# Supplementary material for: Early life risk factors of motor, cognitive and language development: a pooled analysis of studies from low/middle-income countries
Source: PubMed Central journal article supplement — BMJ Open. 2019 Oct 3;9(10):e026449. doi: 10.1136/bmjopen-2018-026449 (PMC6797384; doi:10.1136/bmjopen-2018-026449), 2019-10-03
Supplement: bmjopen-2018-026449.draft_revisions.pdf [file bmjopen-2018-026449.draft_revisions.pdf]

# BMJ Open

BMJ Open is committed to open peer review. As part of this commitment we make the peer review history of every article we publish publicly available.

When an article is published we post the peer reviewers' comments and the authors' responses online. We also post the versions of the paper that were used during peer review. These are the versions that the peer review comments apply to.

The versions of the paper that follow are the versions that were submitted during the peer review process. They are not the versions of record or the final published versions. They should not be cited or distributed as the published version of this manuscript.

BMJ Open is an open access journal and the full, final, typeset and author-corrected version of record of the manuscript is available on our site with no access controls, subscription charges or pay-per-view fees (<http://bmjopen.bmj.com>).

If you have any questions on BMJ Open's open peer review process please email [info.bmjopen@bmj.com](mailto:info.bmjopen@bmj.com)

# BMJ Open

## Early life risk factors of motor, cognitive, and language development: a pooled analysis of studies from low-and middle-income countries

|                               |                                                                                                                                                                                                                                                                                                                                                                                                                                                                                                                                                                                                                                                                                                                                                                                                                                                                                                                                                                                                                                                                                                                                                                                                                                                                                                                                                                                                                                                                                                                                                                                                                                                                                                                                                                                                                                                                                                                                                                                                                                                                                                                                                                                                                                                                                                                                                                                     |
|-------------------------------|-------------------------------------------------------------------------------------------------------------------------------------------------------------------------------------------------------------------------------------------------------------------------------------------------------------------------------------------------------------------------------------------------------------------------------------------------------------------------------------------------------------------------------------------------------------------------------------------------------------------------------------------------------------------------------------------------------------------------------------------------------------------------------------------------------------------------------------------------------------------------------------------------------------------------------------------------------------------------------------------------------------------------------------------------------------------------------------------------------------------------------------------------------------------------------------------------------------------------------------------------------------------------------------------------------------------------------------------------------------------------------------------------------------------------------------------------------------------------------------------------------------------------------------------------------------------------------------------------------------------------------------------------------------------------------------------------------------------------------------------------------------------------------------------------------------------------------------------------------------------------------------------------------------------------------------------------------------------------------------------------------------------------------------------------------------------------------------------------------------------------------------------------------------------------------------------------------------------------------------------------------------------------------------------------------------------------------------------------------------------------------------|
| Journal:                      | <i>BMJ Open</i>                                                                                                                                                                                                                                                                                                                                                                                                                                                                                                                                                                                                                                                                                                                                                                                                                                                                                                                                                                                                                                                                                                                                                                                                                                                                                                                                                                                                                                                                                                                                                                                                                                                                                                                                                                                                                                                                                                                                                                                                                                                                                                                                                                                                                                                                                                                                                                     |
| Manuscript ID                 | bmjopen-2018-026449                                                                                                                                                                                                                                                                                                                                                                                                                                                                                                                                                                                                                                                                                                                                                                                                                                                                                                                                                                                                                                                                                                                                                                                                                                                                                                                                                                                                                                                                                                                                                                                                                                                                                                                                                                                                                                                                                                                                                                                                                                                                                                                                                                                                                                                                                                                                                                 |
| Article Type:                 | Research                                                                                                                                                                                                                                                                                                                                                                                                                                                                                                                                                                                                                                                                                                                                                                                                                                                                                                                                                                                                                                                                                                                                                                                                                                                                                                                                                                                                                                                                                                                                                                                                                                                                                                                                                                                                                                                                                                                                                                                                                                                                                                                                                                                                                                                                                                                                                                            |
| Date Submitted by the Author: | 02-Sep-2018                                                                                                                                                                                                                                                                                                                                                                                                                                                                                                                                                                                                                                                                                                                                                                                                                                                                                                                                                                                                                                                                                                                                                                                                                                                                                                                                                                                                                                                                                                                                                                                                                                                                                                                                                                                                                                                                                                                                                                                                                                                                                                                                                                                                                                                                                                                                                                         |
| Complete List of Authors:     | <p>Sania, Ayesha; Columbia University Medical Center, Neurology<br/>Sudfeld, CR; Harvard University T H Chan School of Public Health, Departments of Global Health and Population<br/>Danaei, Goodarz; Harvard School of Public Health, Global Health and Population<br/>Fink, Günther ; Schweizerisches Tropen- und Public Health-Institut, Household Economics and Health System Research Unit<br/>McCoy, D; Harvard Graduate School of Education<br/>Zhu, Zhaozhong; Harvard University T H Chan School of Public Health<br/>Fawzi, Mary C; Harvard Medical School, Department of Global Health and Social Medicine<br/>Akman, Mehmet; Marmara University School of Medicine,<br/>Arifeen, Shams E.; ICDDR B, Maternal and Child Health Division (MCHD)<br/>Barros, Aluisio; Federal University of Pelotas, Pelotas, Brazil<br/>Bellinger, David; Harvard Medical School<br/>Black, Maureen; University of Maryland School of Medicine,<br/>Bogale, Alemtsehay; The Nature's Bounty Co<br/>Braun, Joseph M; Brown University School of Public Health<br/>van den Broek, Nynke; Liverpool School of Tropical Medicine, aternal and Newborn Health; Liverpool School of Tropical Medicine<br/>Carrara, Verena; Shoklo Malaria Research Unit<br/>Duazo, Paulita; University of San Carlos<br/>Duggan, Christopher; Children's Hospital Boston<br/>Fernald, Lia; University of California, Berkeley, School of Public Health<br/>Gladstone, Melissa; University of Liverpool Institute of Translational Medicine, Women and Children's Health<br/>Hamadani, Jena; International Centre for Diarrhoeal Disease Research<br/>Handal, Alexis; University of New Mexico<br/>Harlow, Siobán; University of Michigan School of Public Health<br/>Hidrobo, Melissa; International Food Policy Research Institute<br/>Kuzawa, Chris ; Northwestern University, Department of Anthropology<br/>Kvestad, Ingrid; Uni Health, Uni Research, Regional Centre for Child and Youth Mental Health and Child Welfare<br/>Locks, Lindsey; Harvard University T H Chan School of Public Health, Nutrition<br/>Manji, Karim; Muhibili University of Health and Allied Sciences, Department of Pediatrics and Child Health<br/>Masanja, Honorati; Ifakara Health Institute, P.O Box 78373, Dar es Salaam, Tanzania, Health<br/>Matijasevich, Alicia; Universidade de Sao Paulo Faculdade de Medicina</p> |

|           |                                                                                                                                                                                                                                                                                                                                                                                                                                                                                                                                                                                                                                                                                                                                                                                                                                                                                                                                                                                                                                                                                                                                                                                                                                                                                                                                                                                                                                                                                                                                                                                                                                 |
|-----------|---------------------------------------------------------------------------------------------------------------------------------------------------------------------------------------------------------------------------------------------------------------------------------------------------------------------------------------------------------------------------------------------------------------------------------------------------------------------------------------------------------------------------------------------------------------------------------------------------------------------------------------------------------------------------------------------------------------------------------------------------------------------------------------------------------------------------------------------------------------------------------------------------------------------------------------------------------------------------------------------------------------------------------------------------------------------------------------------------------------------------------------------------------------------------------------------------------------------------------------------------------------------------------------------------------------------------------------------------------------------------------------------------------------------------------------------------------------------------------------------------------------------------------------------------------------------------------------------------------------------------------|
|           | <p>McDonald, Christine; UCSF Benioff Children's Hospital Oakland<br/>         McGready, Rose; Shoklo Malaria Research Unit, Mahidol-Oxford Tropical<br/>         Medicine Research Unit, Faculty of Tropical Medicine, Mahidol University;<br/>         Centre for Tropical Medicine and Global Health, Nuffield Department of<br/>         Medicine, University of Oxford<br/>         Rizvi, Arjumand; Aga Khan Medical University, Pediatrics and Child Health<br/>         Santos, Darci; Universidade Federal da Bahia<br/>         Santos, Leticia ; Universidade Federal da Bahia<br/>         Save, Dilsad ; Marmara Universitesi Tip Fakultesi<br/>         Shapiro, Roger; Harvard University T H Chan School of Public Health,<br/>         Department of Immunology and Infectious Disease<br/>         Stoecker, Barbara; Oklahoma State University College of Human<br/>         Environmental Sciences, Department of Nutritional Sciences<br/>         Strand, Tor A.; Sykehuset Innlandet Helseforetaket, Research<br/>         Taneja, Sunita; Centre for Health Research and Development, Society for<br/>         Applied Studies<br/>         Tellez-Rojo, Martha-Maria; Instituto Nacional de Perinatologia<br/>         Tofail, Fahmida; International Centre for Diarrhoeal Disease Research,<br/>         Centre for Nutrition &amp; Food Security<br/>         Yousafzai, Aisha; Harvard University T H Chan School of Public Health<br/>         Ezzati, Majid; Imperial College London School of Public Health<br/>         Fawzi, Wafaie.; Harvard University T H Chan School of Public Health</p> |
| Keywords: | Community child health < PAEDIATRICS, Developmental neurology & neurodisability < PAEDIATRICS, PUBLIC HEALTH                                                                                                                                                                                                                                                                                                                                                                                                                                                                                                                                                                                                                                                                                                                                                                                                                                                                                                                                                                                                                                                                                                                                                                                                                                                                                                                                                                                                                                                                                                                    |
|           |                                                                                                                                                                                                                                                                                                                                                                                                                                                                                                                                                                                                                                                                                                                                                                                                                                                                                                                                                                                                                                                                                                                                                                                                                                                                                                                                                                                                                                                                                                                                                                                                                                 |

SCHOLARONE™  
 Manuscripts  
 view only

## Early life risk factors of motor, cognitive, and language development: a pooled analysis of studies from low-and middle-income countries

Ayesha Sania<sup>1</sup>(M.B.B.S, Sc.D), Christopher Sudfeld<sup>2</sup>(Sc.D), Goodarz Danaei<sup>2,3</sup>(Sc.D), Günther Fink<sup>4</sup>(Ph.D), Dana Charles McCoy<sup>5</sup>(Ph.D), Zhaozhong Zhu<sup>6</sup>(Sc.D), Mary C. Smith Fawzi<sup>7</sup>(Sc.D), Mehmet Akman<sup>8</sup>(MD, MPH), Shams Arifeen<sup>9</sup>(M.B.B.S, Dr.PH), Aluísio J. D. Barros<sup>10</sup>(MD, Ph.D), David Bellinger<sup>6,11</sup>(Ph.D), Maureen Black<sup>12</sup>(Ph.D), Alemtsehay Bogale<sup>13</sup>(Ph.D), Joseph Braun<sup>14</sup>(Ph.D), Nynke van den Broek<sup>15</sup>(Ph.D, FRCOG), Verena Ilona Carrara<sup>16</sup>(MD, Ph.D), Paulita Duazo<sup>17</sup>(BS), Christopher P. Duggan<sup>2,18,19</sup>(MD, MPH), Lia Fernald<sup>20</sup>(Ph.D, MBA), Melissa Gladstone<sup>21</sup>(MD, MRCP), Jena Hamadani<sup>9</sup>(Ph.D), Alexis J. Handal<sup>22</sup>(Ph.D., MPH), Siobán Harlow<sup>23</sup>(Ph.D.), Melissa Hidrobo<sup>24</sup>(Ph.D), Christopher W. Kuzawa<sup>25</sup>(Ph.D), Ingrid Kvestad<sup>26</sup>(Ph.D), Lindsey Locks<sup>18</sup>(Sc.D), Karim Manji<sup>27</sup>(MD, MPH), Honorati Masanja<sup>28</sup>(Ph.D), Alicia Matijasevich<sup>29</sup>(MD, Ph.D), Christine McDonald<sup>30</sup>(Sc.D), Rose McGready<sup>31</sup>(Ph.D), Arjumand Rizvi<sup>32</sup>(MSC), Darci Santos<sup>33</sup>(Ph.D), Leticia Santos<sup>33</sup>(Ph.D), Dilsad Save<sup>34</sup>(MD, MPH), Roger Shapiro<sup>35</sup>(MD, MPH), Barbara J. Stoecker<sup>36</sup>(Ph.D), Tor A. Strand<sup>37,38</sup>(MD, Ph.D), Sunita Taneja<sup>39</sup>(Ph.D), Martha-Maria Tellez-Rojo<sup>40</sup>(Ph.D), Fahmida Tofail<sup>41</sup>(M.B.B.S, Ph.D), Aisha K. Yousafzai<sup>2</sup>(Ph.D), Majid Ezzati<sup>42</sup>(Ph.D), Wafaie Fawzi<sup>2</sup>(M.B.B.S., Dr.PH)

### Affiliations:

<sup>1</sup>ICAP, Columbia University, Mailman School of Public Health, 722 W 168th St, New York, NY 10032, USA

<sup>2</sup>Department of Global Health and Population, Harvard T. H. Chan School of Public Health, 665 Huntington Ave, Boston, MA 02115, USA

<sup>3</sup>Department of Epidemiology, Harvard T. H. Chan School of Public Health, 677 Huntington Ave, Boston, MA 02115, USA

<sup>4</sup> Household Economics and Health System Research Unit, Swiss Tropical and Public Health Institute, Socinstrasse 57, 4002 Basel, Switzerland

<sup>5</sup>Harvard Graduate School of Education, Harvard University, 13 Appian Way, Cambridge, MA 02138, USA

<sup>6</sup>Department of Environmental Health, Harvard T. H. Chan School of Public Health, 665 Huntington Ave, Boston, MA 02115, USA

<sup>7</sup>Department of Global Health and Social Medicine, Harvard Medical School, 641 Huntington Ave, Boston, MA 02115, USA

<sup>8</sup>Department of Family Medicine, Marmara University Faculty of Medicine, Pendik, Istanbul, Turkey

<sup>9</sup>Maternal and Child Health Division, icddr,b, Dhaka, Bangladesh

<sup>10</sup>International Center for Equity in Health, Federal University of Pelotas, Pelotas, Brazil

<sup>11</sup>Boston Children's Hospital, 300 Longwood Ave, Boston, MA 02115, USA

<sup>12</sup>Department of Pediatrics, University of Maryland School of Medicine, 737 W. Lombard Street, Baltimore, MD 21201, USA

- 1  
2  
3 <sup>13</sup>The Nature's Bounty Co, 2100 Smithtown Avenue, Ronkonkoma, NY 11779, USA  
4 <sup>14</sup>Department of Epidemiology, Brown University School of Public Health, 121 South Main  
5 Street, Providence, RI 02912, USA  
6  
7 <sup>15</sup>Centre for Maternal and Newborn Health, Liverpool School of Tropical Medicine, University  
8 of Liverpool, Pembroke Place, Liverpool L3 5QA, UK  
9  
10 <sup>16</sup>Shoklo Malaria Research Unit, Mahidol-Oxford Tropical Medicine Research Unit, Faculty of  
11 Tropical Medicine, Mahidol University, Mae Sot, Thailand  
12  
13 <sup>17</sup>Office of Population Studies, University of San Carlos, Cebu City, Philippines  
14  
15 <sup>18</sup>Department of Nutrition, Harvard T. H. Chan School of Public Health, 665 Huntington Ave,  
16 Boston, MA 02115, USA  
17  
18 <sup>19</sup>Center for Nutrition, Boston Children's Hospital, 300 Longwood Ave, Boston, MA 02115,  
19 USA  
20  
21 <sup>20</sup>Public Health Nutrition and Community Health Sciences, University of California Berkeley  
22 School of Public Health, Berkeley, CA 94720, USA  
23  
24 <sup>21</sup>Department of Women's and Children's Health, Institute of Translational Medicine, University  
25 of Liverpool, Liverpool L8 7SS, UK  
26  
27 <sup>22</sup>College of Population Health, UNM Health Sciences Center, University of New Mexico,  
28 Albuquerque, NM 87131, USA  
29  
30 <sup>23</sup>Department of Epidemiology, School of Public Health, University of Michigan, 1415  
31 Washington Heights, Ann Arbor, MI 48109, USA  
32  
33 <sup>24</sup>Poverty, Health and Nutrition Division, International Food Policy Research Institute,  
34 Washington, DC, USA  
35  
36 <sup>25</sup>Department of Anthropology, Northwestern University, 1810 Hinman Avenue, Evanston, IL  
37 60208, USA  
38  
39 <sup>26</sup>Regional Centre for Child and Youth Mental Health and Child Welfare, Uni Research Health  
40 Department, Uni Research, Bergen, Norway  
41  
42 <sup>27</sup>Department of Paediatrics and Child Health, Muhimbili University of Health and Allied  
43 Sciences, Dar es Salaam, Tanzania  
44  
45 <sup>28</sup>Ifakara Health Institute, Tanzania  
46  
47 <sup>29</sup>Department of Preventive Medicine, School of Medicine, University of São Paulo, São Paulo,  
48 Brazil  
49  
50 <sup>30</sup>Children's Hospital Oakland Research Institute, UCSF Benioff Children's Hospital, Oakland,  
51 CA 94609, USA  
52  
53 <sup>31</sup>Mahidol University Faculty of Tropical Medicine. Shoklo Malaria Research Unit, Mahidol-  
54 Oxford Tropical Medicine Research Unit, Mae Sot, Thailand  
55  
56 <sup>32</sup>Department of Paediatrics and Child Health, Aga Khan University, Karachi, Pakistan  
57  
58 <sup>33</sup>Department of Collective Health, Institute of Collective Health, Federal University of Bahia,  
59 Salvador, Bahia, Brazil  
60  
61 <sup>34</sup>Marmara University School of Medicine, Department of Public Health, Istanbul, Turkey  
62  
63 <sup>35</sup>Department of Immunology and Infectious Disease, Harvard T. H. Chan School of Public  
64 Health, 665 Huntington Ave, Boston, MA 02115, USA  
65  
66 <sup>36</sup>Department of Nutritional Sciences, College of Human Environmental Sciences, Oklahoma  
67 State University, Stillwater, OK 74078, USA

<sup>37</sup>Department of Laboratory Medicine, Sykehuset Innlandet, Lillehammer, Norway

<sup>38</sup>Centre for International Health, University of Bergen, Bergen, Norway

<sup>39</sup>Center for Health Research and Development, Society for Applied Studies, New Delhi, India

<sup>40</sup>Division of Research on Public Health, National Institute of Perinatology, Mexico City, Mexico

<sup>41</sup>Nutrition and Clinical Services Division, icddr,b, Dhaka, Bangladesh

<sup>42</sup>Faculty of Medicine, School of Public Health, Imperial College London, London SW7 2AZ, UK

**Corresponding author:** Ayesha Sania,

Department of Neurology, Columbia University Medical Center\*, 710 W 168th St, New York, NY 10032, USA. Phone: 617-997-5005

Email: ays328@mail.harvard.edu

\*Current affiliation

**Short title:** Risk factors of child development in LMIC

**Financial Disclosure:** The authors have no financial relationships relevant to this article to disclose.

**Role of funding source:**

This study was supported by Grand Challenges Canada under the Saving Brains program (grant # 0073-03) to Harvard T. H. Chan School of Public Health. Ayesha Sania was supported by National Institute of Allergy & Infectious Diseases of the National Institutes of Health under award number T32AI114398. The funding source was not involved in the design, conduct, analysis, interpretation, and writing up of the results, nor the decision to submit it for publication. The authors are independent from the study sponsors.

**Potential Conflicts of Interest:** The authors have no conflicts of interest relevant to this article to disclose

**Ethics committee approval:** The pooled study was approved by the Harvard T.H. Chan School of Public Health (IRB16-0256).

**Abbreviations:**

AGA= Appropriate for gestational age

BSID=Bayley Scales of Infant and Toddler Development

IUGR= intra-uterine growth restriction

LBW= Low birth weight, <2500 grams

LMIC= Low-and-middle income countries

LMP= last menstrual period

ECD=Early childhood development

SDGs=Sustainable Development Goals

SMDs=standardized mean differences

SGA=Small-for-gestational age

**Word Count:**

Abstract: 303

Manuscript: 3341

**Authors' contributions:**

Ayesha Sania conceptualized the study, conducted the literature review, data analysis and drafted the manuscript. Christopher Sudfeld, and Wafaie Fawzi conceptualized the study and drafted the manuscript. Goodarz Danaei, Günther Fink, Dana Charles McCoy, Mary C. Smith Fawzi and Majid Ezzati provided critical input in the study design, interpretation of results and reviewed the manuscript. Zhaozhong Zhu participated in literature review and data analysis for the study. Mehmet Akman, Shams Arifeen, Aluísio J. D. Barros, David Bellinger, Maureen Black, Alemtsehay Bogale, Joseph Braun, Nynke van den Broek, Verena Ilona Carrara, Paulita Duazo, Christopher P. Duggan, Lia Fernald, Melissa Gladstone, Jena Hamadani, Alexis J. Handal, Siobán Harlow, Melissa Hidrobo, Christopher W. Kuzawa, Ingrid Kvestad, Lindsey Locks, Karim Manji, Honorati Masanja, Alicia Matijasevich, Christine McDonald, Rose McGready, Arjumand Rizvi, Darci Santos, Leticia Santos, Dilsad Save, Roger Shapiro, Barbara J. Stoecker, Tor A. Strand, Sunita Taneja, Martha-Maria Tellez-Rojo, Fahmida Tofail, and Aisha K.Yousafzai contributed data to the study, analyzed data and reviewed the manuscript. All authors had full access to their respective study data and to all statistical reports and tables of the pooled analyses, and can take responsibility for the integrity of the data and accuracy of data analyses. The corresponding author attests that all listed authors meet authorship criteria and that no others meeting the criteria have been omitted.

**Abstract:**

**Objective:** To determine the magnitude of relationships of early life factors with child development in LMICs.

**Design:** Meta-analyses of standardized mean differences (SMD) estimated from published and unpublished data.

**Data sources:** We searched Medline, bibliographies of key articles and reviews, and grey literature to identify studies from LMICs that collected data on early life exposures and child development. We then invited the first authors of the publications and investigators of unpublished studies to participate in the study.

**Eligibility criteria for selecting studies:** Studies that assessed at least one domain of child development in at least 100 children under 7 years of age, and collected at least one early life factor of interest were included in the study.

**Analyses:** Linear regression models were used to assess SMDs in child development by parental and child factors within each study. We then produced pooled estimates across studies using random effects meta-analyses.

**Results:** We retrieved data from 21 studies including 20,882 children across 13 LMICs, to assess the associations of exposure to 14 major risk factors with child development. Children of mothers with secondary schooling had 0.14 SD (95% Confidence Interval, CI: 0.05, 0.25) higher cognitive scores compared to children whose mothers had primary education. Preterm birth was associated with 0.14 SD (-0.24, -0.05) and 0.23 SD (-0.42, -0.03) reductions in cognitive and motor scores, respectively. Maternal short stature, anemia in infancy, and lack of access to clean water and sanitation had significant negative associations with cognitive and motor development with effects ranging from -0.18 to -0.10 SDs.

**Conclusions:** Differential parental, environmental, and nutritional factors contribute to disparities in child development across LMICs. Targeting these factors from pre-pregnancy through childhood may improve health and development of children.

**Funding:** Grand Challenges Canada under the Saving Brains program (grant # 0073-03), National Institute of Health (grant # T32AI114398).



**Strengths and Limitations of this study:**

- Pooling data from 21 studies, this study provides the most comprehensive analysis of early life risk factors of child development in low-and middle-income countries
- The study cohorts were selected from 13 countries across the globe
- Uniform classifications of early life exposures and statistical analyses applied across studies
- 14 major risk factors, - parental, environmental and nutritional factors are included
- Data on important risk factors such as exposure to environmental neurotoxicants, responsive parenting behaviors, and child stimulation were not available

For peer review only

## Introduction:

More than 250 million children under age 5 years in low-and middle-income countries (LMICs) are at risk of not attaining their full development potential.<sup>1-3</sup> The first 1000 days (from conception through 24 months of age) is critical for children's development, as the plasticity of the rapidly developing brain makes it vulnerable to harmful exposures as well as receptive to positive stimuli during this period.<sup>4 5</sup> Suboptimal development in early childhood may have long-term detrimental effects on education<sup>6</sup> and income attainment,<sup>7</sup> which in turn contribute to poverty and inequality across the lifecycle, and possibly also across generations.<sup>8</sup> Disadvantaged children with developmental deficits lose an estimated 19.8% of adult income yearly,<sup>9</sup> with an estimated global cost of US\$ 177 billion for physical growth delays alone.<sup>10</sup> In recognition of the high burden and cost associated with early life disadvantage, the 2030 Sustainable Development Goals (SDGs) directly target early childhood development under SDG 4,<sup>11</sup> which calls for ensuring access to quality early childhood development care and pre-primary education for all children.

The relative importance of exposures to nutritional, socioeconomic and environmental risk factors in early life on different domains of child development in LMICs is poorly understood. Studies systematically reviewing the evidence linking early life risk factors to child outcomes primarily focused on growth (e.g., stunting),<sup>9 12</sup> identifying iodine deficiency, iron deficiency anemia, intrauterine growth restriction, maternal depression, exposure to violence, HIV infection as risk factors, and cognitive stimulation, maternal education, breastfeeding as protective factors.<sup>13 14</sup> However, the independent pathways from these risks to cognitive, motor and language development are not fully elucidated yet.<sup>15 16</sup> Consequently, priority risk factors and

1  
2  
3 interventions for improving cognitive, language, and motor development may differ from those  
4  
5 designed to improve physical development in LMICs.  
6

7  
8 To determine the magnitude of the relationships linking early life exposures with child  
9  
10 development in LMICs, we pooled data from 21 studies conducted in LMICs. We then examined  
11  
12 the associations of early life risk factors on cognitive, motor and language development among  
13  
14 children aged less than 7 years across studies. These pooled observational estimates are intended  
15  
16 to inform the design of individual and packaged intervention studies to promote early child  
17  
18 development in LMICs.  
19  
20  
21  
22  
23  
24  
25  
26  
27  
28  
29  
30  
31  
32  
33  
34  
35  
36  
37  
38  
39  
40  
41  
42  
43  
44  
45  
46  
47  
48  
49  
50  
51  
52  
53  
54  
55  
56  
57  
58  
59  
60

## Methods

### *Study identification:*

We searched Medline, bibliographies of key articles and reviews, and grey literature to identify studies from low-income and middle-income countries (LMICs) that collected data on early life exposures and child development. Search terms included a list of risk factors, terms related to motor, cognitive, language and socioemotional development, and a list of low and middle income countries (list of search terms, appendix 1). We also identified studies via personal communication with researchers of published studies. We initially contacted 50 first authors of the publications and investigators of unpublished studies, of whom 33 (66%) responded to participate in the present study (figure 1).

We then asked researchers to complete a survey that included questions about child development assessment tools used, age of developmental assessment and details on the early life factors measured in their study. The primary inclusion criterion for studies was the assessment of at least one domain of child development (cognitive, motor, language and socioemotional) using a standard child development assessment instrument in at least 100 children before 7 years of age, as well as the collection of at least one early life factor of interest as part of the study. Following the survey, 10 investigators declined to participate, 2 studies were excluded as the eligible sample size was less than 100 and 1 study was excluded as development was assessed after age 7 years. The investigators then shared results of pre-defined analyses on their data or shared data with researchers at the Harvard T.H. Chan School of Public Health to complete the analyses of individual studies and the meta-analyses.

### ***Outcomes and early life factors:***

We included cognitive, motor and language outcomes in the analyses, socioemotional outcomes were not measured in a sufficient number of studies. If a study measured child development on multiple occasions, we included the measurement obtained at the age closest to 24 months.

Based on the survey responses we identified 14 early life factors for the pooled analyses and grouped them into parental factors: father's education (none <1 year; primary 1 - <6 years; secondary 6-<10 years; higher  $\geq 10$  years), mother's education (none <1 year; primary 1 - <6 years; secondary 6-<10 years; higher  $\geq 10$  years), maternal age (<15 years, 15-<20 years, 20-<35 years;  $\geq 35$  years), maternal height (<145 cm, 145-<150 cm, 150-<155 cm,  $>155$  cm) maternal body mass index (BMI; <18.5 kg/m<sup>2</sup>, 18.5-<25 kg/m<sup>2</sup>, 25-<30 kg/m<sup>2</sup>,  $\geq 30$  kg/m<sup>2</sup>), hemoglobin level during pregnancy (normal  $\geq 110$  g/L; mild anemia 100-109 g/L; moderate anemia 70-99 g/L) and child factors: birth weight (low birth weight <2500g; moderate low 2000-2500g; very low birth weight <2000g), preterm birth (preterm <37 weeks; late preterm 34-37 weeks; early preterm <34 weeks), small-for-gestational-age (SGA; <10 percentile; moderate SGA 3-<10 percentile; severe SGA <3 percentile) as determined by Alexander and Oken standards, exclusive breastfeeding until 6 months of age, hemoglobin levels in infancy (normal  $\geq 110$  g/L; mild anemia 100-109 g/L; moderate anemia 70-99 g/L), access to clean water (yes, no), access to sanitation (yes, no) and diarrhea preceding the 6 months before development assessment (yes, no). Details on the definition and categories of the risk factors are included in appendix 2. We also enquired about data on birth spacing, maternal HIV infection, malaria, intimate partner violence and depression, but a limited number of studies had data on these factors.

### ***Analyses of individual studies:***

Within each study, linear regression models were used to assess standardized mean differences (SMDs) in cognitive, motor, and language scores for selected risk factors. Multivariable models were adjusted for child's age and sex, maternal education and a measure of socioeconomic status (e.g. household income or wealth index). In addition, estimates for preterm birth and gestation-specific birth weight category (SGA and appropriate-for-gestational-age) were adjusted for each other. If a study was a randomized trial, intervention assignment was also included in the adjusted model. The missing indicator method was used for covariates when <10% of the data were missing; if more than 10% were missing the covariate was excluded from the analyses.

### ***Meta-analysis:***

Meta-analysis for a given risk factor was conducted if estimates from at least four studies were available. To account for the variation in tools used for measuring development we only pooled the means and standard errors of the standardized outcomes scores. As multivariable adjustment substantially changed the effect estimates, we used the adjusted effect estimates for meta-analysis. Given that heterogeneous effects seemed likely across the large variety of contexts studied, random effects meta-analysis was conducted using the DerSimonian and Laird method.<sup>17</sup> Heterogeneity was assessed using  $I^2$  statistics. All analyses were conducted using the metaan commands in Stata 12.0 (StataCorp, College Station, TX)

### ***Ethical consideration:***

The pooled study was approved by the Harvard T.H. Chan School of Public Health (IRB16-0256).

## Results:

Table 1 shows the characteristics of the studies included in the analyses. We included 21 data sets with developmental measurements on 20,882 children of which 8 were from Asia,<sup>18-25</sup> 7 were from sub-Saharan Africa,<sup>26-32</sup> 5 were from Latin America and 1 from Europe.<sup>33-38</sup> The majority of studies (n=18), including 12 randomized trials,<sup>18-22 25 26 29-32 38</sup> followed up the participants prospectively. The Bayley Scales of Infant and Toddler Development (BSID) was used to assess child development in most of the studies with, BSID-III administered in 5 studies,<sup>23 26 30-32</sup> BSID-II in 5 studies,<sup>18-21 29</sup> and BSID I in 1 study.<sup>38</sup> The Ages and Stages questionnaire was used in 2 studies,<sup>22 36</sup> and a few studies used local adaptations of standard tools.<sup>28 35</sup> The majority of the studies had data on both motor and cognitive development,<sup>18-24 26-38</sup> 1 study had data on motor development only<sup>25</sup> and 6 studies provided data on language development.<sup>28 30-33</sup> Development was assessed before age 2 years in most studies,<sup>18-26 28-34 37 38</sup> except for 3 studies that assessed development at ages between 3-6 years.<sup>27 35 36</sup>

## Parental factors:

Pooled estimates for the association of parental factors with child cognitive, motor, and language development are presented in Table 2. Higher attained maternal education was associated with improved cognitive, motor, and language development scores. Children whose mothers attended or completed secondary school had 0.14 SD (95% CI: 0.05, 0.25), 0.12 SD (95% CI: 0.06, 0.18), and 0.13 SD (95% CI: 0.04, 0.21) higher cognitive, motor and language scores, respectively, as compared to children whose mothers only had primary school education. Compared to children of mothers with primary education, children of mothers with  $\geq$  ten years of education scored 0.36 SD (95% CI: 0.19, 0.48), 0.26 SD (95% CI: 0.14, 0.38) and 0.21 SD (95% CI 0.09, 0.33) higher

1  
2  
3 in cognitive, motor and language scores, respectively. Children of mothers with no formal  
4 schooling scored lowest in cognitive, motor and language scores. There was a significant  
5  
6 positive association between father's education and cognitive and motor development after  
7  
8 adjusting for maternal education, although the magnitude of the effect sizes was smaller than for  
9  
10 those of maternal education. We found no significant relationships between maternal age at birth  
11  
12 and cognitive, motor, or language development.  
13  
14  
15

16  
17  
18  
19 Children of mothers with short stature (height <155 cm) tended to have lower cognitive, motor,  
20  
21 and language scores as compared with a maternal height >155cm. Children whose mothers were  
22  
23 <145cm scored 0.10 SD (95% CI -0.20, -0.004), 0.11 SD (95% CI: -0.19, -0.03), and 0.11 SD  
24  
25 (95% CI: -0.31, 0.09) lower on cognitive, motor, and language development, respectively. Low  
26  
27 maternal BMI (<18.5 kg/m<sup>2</sup>) was significantly associated with lower cognitive development  
28  
29 scores (SD: -0.10; 95% CI -0.19, -0.02), but not motor or language development. There was no  
30  
31 significant association of maternal hemoglobin with child cognition.  
32  
33  
34  
35  
36  
37

### 38 ***Child factors:***

39  
40 Pooled estimates for the association of child factors with development are presented in Table 3.  
41  
42 Compared to children born with normal birth weight, children born with low birth weight  
43  
44 (<2500g) had significantly poorer cognitive and motor scores. Children with birthweights  
45  
46 <2000g had on average 0.27 SD (95% CI: -0.49, -0.07) lower cognitive, 0.26 SD (95% CI: -0.40,  
47  
48 -0.12) lower motor and 0.28 SD (95% CI: -0.60, 0.05) lower language scores, compared with  
49  
50 normal birthweight children (≥2500 g). Compared to term and appropriate for gestational age  
51  
52 (AGA) infants, preterm-AGA infants had 0.14 SD (95% CI: -0.24, -0.05) and 0.23 SD (95% CI:  
53  
54  
55  
56  
57  
58  
59  
60



1  
2  
3 -0.42, -0.03) lower cognitive and motor scores, respectively. Term-SGA infants had poorer  
4  
5 developmental scores in some studies, but the pooled effect estimates for term-SGA, adjusted for  
6  
7 preterm birth, were not statistically significant.  
8  
9

10  
11  
12 Anemia in infancy was significantly and negatively associated with both motor and cognitive  
13  
14 development scores. Combined effect sizes of moderate anemia were -0.18 SD (95% CI -0.27, -  
15  
16 0.09) for motor and -0.11 SD (95% CI -0.12, - 0.10) for cognitive scores. Compared to children  
17  
18 residing in households with access to clean water, children without access had 0.10 SD (95% CI:  
19  
20 -0.12, -0.09) lower cognitive and 0.07 SD (95% CI: -0.16, 0.01) lower motor and 0.15 SD (95%  
21  
22 CI: -0.35, -0.05) lower language scores. Children without access to clean sanitation had 0.13 SD  
23  
24 (95% CI: -0.18, -0.07) lower cognitive and 0.10 SD (95% CI: -0.19, -0.01) lower motor scores.  
25  
26  
27 In the pooled analyses, exclusive breastfeeding until 6 months of age and diarrhea during the  
28  
29 preceding 6-month of development assessment did not have significant associations with either  
30  
31 cognitive or motor development.  
32  
33

34  
35 Figure 2 presents effect sizes of all risk factors included in the analyses. Forests plots of  
36  
37  
38  
39  
40  
41  
42  
43  
44  
45  
46  
47  
48  
49  
50  
51  
52  
53  
54  
55  
56  
57  
58  
59  
60  
61  
62  
63  
64  
65  
66  
67  
68  
69  
70  
71  
72  
73  
74  
75  
76  
77  
78  
79  
80  
81  
82  
83  
84  
85  
86  
87  
88  
89  
90  
91  
92  
93  
94  
95  
96  
97  
98  
99  
100  
101  
102  
103  
104  
105  
106  
107  
108  
109  
110  
111  
112  
113  
114  
115  
116  
117  
118  
119  
120  
121  
122  
123  
124  
125  
126  
127  
128  
129  
130  
131  
132  
133  
134  
135  
136  
137  
138  
139  
140  
141  
142  
143  
144  
145  
146  
147  
148  
149  
150  
151  
152  
153  
154  
155  
156  
157  
158  
159  
160  
161  
162  
163  
164  
165  
166  
167  
168  
169  
170  
171  
172  
173  
174  
175  
176  
177  
178  
179  
180  
181  
182  
183  
184  
185  
186  
187  
188  
189  
190  
191  
192  
193  
194  
195  
196  
197  
198  
199  
200  
201  
202  
203  
204  
205  
206  
207  
208  
209  
210  
211  
212  
213  
214  
215  
216  
217  
218  
219  
220  
221  
222  
223  
224  
225  
226  
227  
228  
229  
230  
231  
232  
233  
234  
235  
236  
237  
238  
239  
240  
241  
242  
243  
244  
245  
246  
247  
248  
249  
250  
251  
252  
253  
254  
255  
256  
257  
258  
259  
260  
261  
262  
263  
264  
265  
266  
267  
268  
269  
270  
271  
272  
273  
274  
275  
276  
277  
278  
279  
280  
281  
282  
283  
284  
285  
286  
287  
288  
289  
290  
291  
292  
293  
294  
295  
296  
297  
298  
299  
300  
301  
302  
303  
304  
305  
306  
307  
308  
309  
310  
311  
312  
313  
314  
315  
316  
317  
318  
319  
320  
321  
322  
323  
324  
325  
326  
327  
328  
329  
330  
331  
332  
333  
334  
335  
336  
337  
338  
339  
340  
341  
342  
343  
344  
345  
346  
347  
348  
349  
350  
351  
352  
353  
354  
355  
356  
357  
358  
359  
360  
361  
362  
363  
364  
365  
366  
367  
368  
369  
370  
371  
372  
373  
374  
375  
376  
377  
378  
379  
380  
381  
382  
383  
384  
385  
386  
387  
388  
389  
390  
391  
392  
393  
394  
395  
396  
397  
398  
399  
400  
401  
402  
403  
404  
405  
406  
407  
408  
409  
410  
411  
412  
413  
414  
415  
416  
417  
418  
419  
420  
421  
422  
423  
424  
425  
426  
427  
428  
429  
430  
431  
432  
433  
434  
435  
436  
437  
438  
439  
440  
441  
442  
443  
444  
445  
446  
447  
448  
449  
450  
451  
452  
453  
454  
455  
456  
457  
458  
459  
460  
461  
462  
463  
464  
465  
466  
467  
468  
469  
470  
471  
472  
473  
474  
475  
476  
477  
478  
479  
480  
481  
482  
483  
484  
485  
486  
487  
488  
489  
490  
491  
492  
493  
494  
495  
496  
497  
498  
499  
500  
501  
502  
503  
504  
505  
506  
507  
508  
509  
510  
511  
512  
513  
514  
515  
516  
517  
518  
519  
520  
521  
522  
523  
524  
525  
526  
527  
528  
529  
530  
531  
532  
533  
534  
535  
536  
537  
538  
539  
540  
541  
542  
543  
544  
545  
546  
547  
548  
549  
550  
551  
552  
553  
554  
555  
556  
557  
558  
559  
560  
561  
562  
563  
564  
565  
566  
567  
568  
569  
570  
571  
572  
573  
574  
575  
576  
577  
578  
579  
580  
581  
582  
583  
584  
585  
586  
587  
588  
589  
590  
591  
592  
593  
594  
595  
596  
597  
598  
599  
600  
601  
602  
603  
604  
605  
606  
607  
608  
609  
610  
611  
612  
613  
614  
615  
616  
617  
618  
619  
620  
621  
622  
623  
624  
625  
626  
627  
628  
629  
630  
631  
632  
633  
634  
635  
636  
637  
638  
639  
640  
641  
642  
643  
644  
645  
646  
647  
648  
649  
650  
651  
652  
653  
654  
655  
656  
657  
658  
659  
660  
661  
662  
663  
664  
665  
666  
667  
668  
669  
670  
671  
672  
673  
674  
675  
676  
677  
678  
679  
680  
681  
682  
683  
684  
685  
686  
687  
688  
689  
690  
691  
692  
693  
694  
695  
696  
697  
698  
699  
700  
701  
702  
703  
704  
705  
706  
707  
708  
709  
710  
711  
712  
713  
714  
715  
716  
717  
718  
719  
720  
721  
722  
723  
724  
725  
726  
727  
728  
729  
730  
731  
732  
733  
734  
735  
736  
737  
738  
739  
740  
741  
742  
743  
744  
745  
746  
747  
748  
749  
750  
751  
752  
753  
754  
755  
756  
757  
758  
759  
760  
761  
762  
763  
764  
765  
766  
767  
768  
769  
770  
771  
772  
773  
774  
775  
776  
777  
778  
779  
780  
781  
782  
783  
784  
785  
786  
787  
788  
789  
790  
791  
792  
793  
794  
795  
796  
797  
798  
799  
800  
801  
802  
803  
804  
805  
806  
807  
808  
809  
810  
811  
812  
813  
814  
815  
816  
817  
818  
819  
820  
821  
822  
823  
824  
825  
826  
827  
828  
829  
830  
831  
832  
833  
834  
835  
836  
837  
838  
839  
840  
841  
842  
843  
844  
845  
846  
847  
848  
849  
850  
851  
852  
853  
854  
855  
856  
857  
858  
859  
860  
861  
862  
863  
864  
865  
866  
867  
868  
869  
870  
871  
872  
873  
874  
875  
876  
877  
878  
879  
880  
881  
882  
883  
884  
885  
886  
887  
888  
889  
890  
891  
892  
893  
894  
895  
896  
897  
898  
899  
900  
901  
902  
903  
904  
905  
906  
907  
908  
909  
910  
911  
912  
913  
914  
915  
916  
917  
918  
919  
920  
921  
922  
923  
924  
925  
926  
927  
928  
929  
930  
931  
932  
933  
934  
935  
936  
937  
938  
939  
940  
941  
942  
943  
944  
945  
946  
947  
948  
949  
950  
951  
952  
953  
954  
955  
956  
957  
958  
959  
960  
961  
962  
963  
964  
965  
966  
967  
968  
969  
970  
971  
972  
973  
974  
975  
976  
977  
978  
979  
980  
981  
982  
983  
984  
985  
986  
987  
988  
989  
990  
991  
992  
993  
994  
995  
996  
997  
998  
999  
1000

## Discussion:

This pooled analysis of development assessment of 20,882 children from 21 LMIC studies determined that low maternal and paternal education, short maternal stature, low birth weight, preterm birth, anemia in infancy, and lack of access to clean water and sanitation were associated with lower child development scores among children < 7 years of age. We did not find significant associations of maternal anemia, fetal growth restriction, exclusive breastfeeding, or childhood diarrhea with development scores.

We observed a dose-response relationship between parental education and child development. While a large body of literature supports the consistent role of maternal education in promoting children's language and cognitive developments, evidence on the role of paternal education is more limited.<sup>34 39 40</sup> Recent reports suggest advanced language and cognitive development among children of more educated fathers that persisted after adjustment for family income and mothers' education.<sup>41</sup> Maternal education is associated with more warm, responsive, and stimulating home environments, which in turn are predictive of more positive developmental outcomes for children.<sup>42</sup> High maternal education is also linked with protective factors like good feeding and hygiene practices and frequent utilization of antenatal care and child immunization.<sup>43 44</sup> In addition, low maternal education is associated with known risk factors of poor child development such as malnutrition in children, and depression and stress in mothers.<sup>45 46</sup> Although prior work suggests that less educated mothers tend to be less receptive to early childhood development (ECD) messages, research also shows that their children may benefit more from ECD interventions.<sup>47</sup> Therefore, adopting a 2-generational intervention approach to empower parents and improve parenting capacity are likely to generate long-term benefits for child development.

1  
2  
3 Due to the availability of maternal education data, low maternal education can serve as a simple  
4 risk marker to target children in need of ECD intervention.<sup>48</sup>  
5  
6  
7  
8  
9

10 We found significant negative associations of preterm birth with cognitive and motor  
11 development but not with language development. Meta-analyses of studies conducted in  
12 developed countries reported lower IQ scores and cognitive functioning,<sup>49-51</sup> along with deficits  
13 in motor<sup>52</sup>, language<sup>53</sup>, and visual-spatial abilities<sup>54</sup> in preterm infants. Reduction of the  
14 intrauterine period interrupts the trajectory of neurodevelopmental processes such as synapse  
15 formation and myelination, which often leads to neurocognitive deficits.<sup>55</sup> Although most  
16 preterm infants catch up in physical growth<sup>56</sup>, this deficit in neurocognitive development often  
17 persists into childhood and adolescence.<sup>57 58</sup> Given the high incidence of preterm delivery in  
18 LMIC<sup>59</sup> and the increased survival of preterm infants with medical advances, the burden of the  
19 developmental deficits caused by preterm birth in LMIC may be increasing. There are currently  
20 few interventions to prevent preterm birth<sup>60</sup>; however, a variety of psychosocial interventions to  
21 alleviate the adverse neurodevelopmental effects of preterm birth implemented at different points  
22 in early childhood have shown modest short-term benefits.<sup>61</sup>  
23  
24  
25  
26  
27  
28  
29  
30  
31  
32  
33  
34  
35  
36  
37  
38  
39  
40  
41

42 We found that fetal growth restriction, assessed via SGA, was not significantly associated with  
43 child development. This agrees with several reports from developed countries<sup>62-64</sup> whereas others  
44 have reported adverse effects of SGA on cognitive and motor functioning<sup>31 65 66</sup>. These disparate  
45 findings could be caused by different definitions of SGA and/or timing of the developmental  
46 assessment. Most studies from LMICs used LBW (as marker of SGA), which is also caused by  
47 prematurity, a major risk predictor of child development. There is some evidence that with  
48  
49  
50  
51  
52  
53  
54  
55  
56  
57  
58  
59  
60

1  
2  
3 adequate nutrition, the developmental deficit in SGA infants is often compensated with age,  
4  
5 although the gap in physical growth remains<sup>67</sup>. This finding underscores the potentially  
6  
7 differential roles and separate causal mechanisms of effects of early life risk factors for physical  
8  
9 and mental development. It is important to note that the effect size for SGA may be biased  
10  
11 downwards considering the heterogeneity in outcome and the measurement error due to the use  
12  
13 of last menstrual period (LMP) date for the estimation of gestational age in most the studies. We  
14  
15 found significant negative associations between short maternal stature (<145 cm) and low BMI  
16  
17 (<18.5 kg/m<sup>2</sup>)<sup>68</sup> on cognitive function, which may indicate the role of chronic malnutrition of  
18  
19 mothers over their life course on pregnancy health and development of fetus. These are also  
20  
21 known risk factors of SGA,<sup>68</sup> suggesting that adverse effects of fetal growth restriction on child  
22  
23 development are possible. Further research is needed to quantify the effects of fetal growth  
24  
25 restriction on children's development and evaluate the effects of interventions to alleviate the  
26  
27 negative impacts of SGA on development.  
28  
29  
30  
31  
32  
33  
34

35 We found an adverse role of anemia in infancy with motor and cognitive development. Prior  
36  
37 studies reported significant effects of anemia on cognitive, motor and socioemotional  
38  
39 development that persisted into middle childhood during longitudinal follow-up<sup>69</sup>. Worldwide,  
40  
41 the predominant cause of anemia for infants and children is iron deficiency<sup>70</sup>, which can interfere  
42  
43 with myelination, synapse formation and protein expression during sensitive periods of  
44  
45 neurodevelopment<sup>71</sup>. Meta-analyses of randomized trials of infant iron supplementation have not  
46  
47 established an effect on child development; however statistical power to detect effect sizes of <  
48  
49 0.2 SD as our analysis predicts is limited due to few trials with large enough sample sizes.<sup>72 73</sup> In  
50  
51 our pooled analyses, maternal anemia during pregnancy, an important determinant of anemia in  
52  
53  
54  
55  
56  
57  
58  
59  
60

1  
2  
3 infancy<sup>74</sup>, was not significantly associated with children's development. We also did not find a  
4  
5 significant association between exclusive breastfeeding until 6 months of age and children's  
6  
7 development. Nevertheless, few studies included in our pooled analyses had a sufficient number  
8  
9 of infants who were exclusively breastfed until six months to allow for a well-powered analysis.  
10  
11 Because of the multidimensional benefits of breastfeeding from infection prevention to fostering  
12  
13 mother-infant bonding and infant attachment, significant positive effects of exclusive  
14  
15 breastfeeding on child development are plausible. Meta-analyses of studies of effects of  
16  
17 breastfeeding on children's development reported significant increases in intelligence and  
18  
19 cognitive scores<sup>75 76</sup>; however some studies have attributed these associations entirely to the  
20  
21 presence of confounding by socioeconomic status and stimulation at home.<sup>77</sup>  
22  
23  
24  
25  
26  
27

28  
29 This study is among the first to report on the associations between lack of access to safe water  
30  
31 and sanitation and child cognitive development. The burden of developmental deficit attributed  
32  
33 to these risk factors is likely very high as a large proportion of the population in LMICs reside in  
34  
35 unhygienic environments with limited access to safe water. The effects of poor sanitation and  
36  
37 unsafe water on child cognitive development are potentially mediated through childhood anemia,  
38  
39 inflammation and undernutrition resulting from frequent enteric infections<sup>78</sup>. However, in the  
40  
41 pooled analyses, we did not find any significant adverse associations between diarrhea and  
42  
43 development, which is different from previously published evidence<sup>22 79 80</sup>. One potential  
44  
45 explanation for the lack of association found in this study may be measurement error: diarrhea is  
46  
47 inherently complex and hard to measure; variations in the definitions of episodes as well as  
48  
49 parental inability to correctly report diarrhea may have led to the failure to detect potential  
50  
51 effects of diarrhea on cognitive, motor and language development in this study.  
52  
53  
54  
55  
56  
57  
58  
59  
60

1  
2  
3 The strengths of this pooled study include the global coverage of the cohorts, the large sample  
4 size, and uniform classifications of early life exposures and statistical analyses across studies.  
5  
6 Nevertheless, there are also several limitations, including the lack of data on exposure to  
7  
8 environmental neurotoxicants, maternal depression, responsive parenting behaviors, and child  
9  
10 stimulation and early education. A recent meta-analysis determined that the potential effect of  
11  
12 responsive stimulation on cognitive development at 2 years of age was +0.42SD (95% CI: 0.36,  
13  
14 0.48)<sup>81</sup>, which is larger than all risk factors examined in our analysis. Thus, comprehensive  
15  
16 packages of environmental, nutrition, and stimulation interventions may produce larger effect  
17  
18 sizes than interventions targeting single risks. In addition, due to the observational nature of the  
19  
20 studies included in this analysis, we are unable to determine a causal relationship between  
21  
22 parental and child factors with child development. Although we have adjusted for major  
23  
24 confounders the potential for residual confounding remains. Last, there was moderate to high  
25  
26 levels of heterogeneity, as indicated by the  $I^2$  values, in some of our pooled estimates. The  
27  
28 magnitude of the relationship for maternal education, prematurity, birthweight, SGA, and access  
29  
30 to water and sanitation appeared to vary by study cohort. Accordingly, future intervention studies  
31  
32 should be conducted among diverse study populations as their effect may importantly differ by  
33  
34 setting.  
35  
36  
37  
38  
39  
40  
41  
42  
43

44 In summary, in a pooled study of 21 studies in LMICs, we determined that multiple risk factors  
45  
46 classically associated with child morbidity and mortality also appear to have negative  
47  
48 associations with cognitive, motor, and language development. As a result, our study suggests  
49  
50 that interventions that span pre-pregnancy through early and middle childhood may be necessary  
51  
52 to provide optimal child development in LMICs. Future research should focus on determining  
53  
54  
55  
56  
57  
58  
59  
60

1  
2  
3  
4  
5  
6  
7  
8  
9  
10  
11  
12  
13  
14  
15  
16  
17  
18  
19  
20  
21  
22  
23  
24  
25  
26  
27  
28  
29  
30  
31  
32  
33  
34  
35  
36  
37  
38  
39  
40  
41  
42  
43  
44  
45  
46  
47  
48  
49  
50  
51  
52  
53  
54  
55  
56  
57  
58  
59  
60

the effectiveness of, and delivery strategies for comprehensive intervention packages to promote child development.

For peer review only

1  
2  
3  
4  
5 **Key Words:**  
6

7 Motor development  
8 cognitive development  
9 Language development  
10 Early life risk factors  
11 Preterm  
12 SGA  
13 Maternal education  
14 Paternal education  
15 Maternal short stature  
16 Maternal anemia  
17 anemia in infancy,  
18 Access to clean water  
19 Access to sanitation  
20 Breastfeeding  
21 Diarrhea  
22  
23  
24  
25  
26  
27  
28  
29

30 **Figure Legends**  
31

32 Figure 1: flow chart of study selection  
33

34 Figure 2- Panel A: Pooled estimates of association between maternal factors and development  
35

36 Panel B: Pooled estimates of association between child factors and development  
37  
38  
39  
40  
41  
42  
43  
44  
45  
46  
47  
48  
49  
50  
51  
52  
53  
54  
55  
56  
57  
58  
59  
60



Table 1: Characteristics of the included studies

| Study                     | Setting                         | Primary study design | Study population                                       | N<br>(data on child development)        | Child development tool used | Child age in years at assessment (mean±SD)                                                                                                          |            |
|---------------------------|---------------------------------|----------------------|--------------------------------------------------------|-----------------------------------------|-----------------------------|-----------------------------------------------------------------------------------------------------------------------------------------------------|------------|
| <b>Asia</b>               |                                 |                      |                                                        |                                         |                             |                                                                                                                                                     |            |
| 1                         | Black (2004) <sup>18</sup>      | Bangladesh           | randomized controlled trial                            | birth cohort                            | 221                         | Bayley Scales of Infant and Toddler Development, 2nd edition (BSID-II) and the Home Observation for Measurement of the Environment (HOME) Inventory | 1.06±0.03  |
| 2                         | Tofail (2008) <sup>19</sup>     | Bangladesh           | randomized controlled trial                            | birth cohort                            | 2853 total (2116 tested)    | 2 problem-solving tests, motor index of Bayley Scales of Infant and Toddler Development, 2nd edition (BSID-II) and Wolke's behavior ratings         | 0.61±0.02  |
| 3                         | Tofail (2012) <sup>20</sup>     | Bangladesh           | randomized controlled trial                            | prospective, community-based cohort     | 249                         | Bayley Scales of Infant and Toddler Development, 2nd edition (BSID-II)                                                                              | 0.84±0.01  |
| 4                         | Taneja (2005) <sup>21</sup>     | India                | randomized placebo-controlled trial                    | Prospective, community-based cohort     | 571                         | Bayley Scales of Infant and Toddler Development, 2nd edition (BSID-II)                                                                              | 1.25±0.16  |
| 5                         | Kvestad (2015) <sup>22</sup>    | India                | randomized placebo-controlled trial                    | prospective, community-based cohort     | 422                         | Ages and Stages Questionnaire, 3 <sup>rd</sup> edition (ASQ-3)                                                                                      | 1.37±0.60  |
| 6                         | Yousafzai (2014) <sup>23</sup>  | Pakistan             | community-based cluster-randomized effectiveness trial | prospective, community-based cohort     | 1357                        | Bayley Scales of Infant and Toddler Development, 3rd edition (BSID-III)                                                                             | 11.6 ±0.83 |
| 7                         | Duazo (2010) <sup>24</sup>      | Philippines          | longitudinal program evaluation                        | birth cohort                            | 4904                        | Philippines Revised Early Childhood Development Checklist (REC)                                                                                     | 1.62±0.88  |
| 8                         | McGready (2007) <sup>25</sup>   | Thailand             | randomized controlled trial                            | prospective, facility-based cohort      | 503                         | Shoklo Developmental Test                                                                                                                           | 1.62±0.02  |
| <b>Sub-Saharan Africa</b> |                                 |                      |                                                        |                                         |                             |                                                                                                                                                     |            |
| 9                         | Shapiro (2013) <sup>26</sup>    | Botswana             | randomized controlled trial                            | prospective, community-based cohort     | 224                         | Bayley Scales of Infant and Toddler Development, 3rd edition (BSID-III)                                                                             | 2.03±0.08  |
| 10                        | Alemtsehay (2009) <sup>27</sup> | Ethiopia             | cross-sectional study                                  | cross-sectional, community-based cohort | 100                         | Raven's Colored Progressive Matrices (CPM) and Kaufman Assessment Battery for Children-II (KABC-II)                                                 | 5.11±0.24  |
| 11                        | Gladstone (2011) <sup>28</sup>  | Malawi               | cross-sectional community-based cohort study           | community-based cohort                  | 840                         | Ten Question Questionnaire [TQQ] and Malawi Developmental Assessment Tool [MDAT]                                                                    | 1.74±0.33  |
| 12                        | McDonald (2013) <sup>29</sup>   | Tanzania             | randomized placebo-controlled trial                    | birth cohort                            | 305                         | Bayley Scales of Infant and Toddler Development, 2nd edition (BSID-II)                                                                              | 1.28±0.04  |
| 13                        | Manji (2014) <sup>30</sup>      | Tanzania             | randomized placebo-controlled trial                    | birth cohort                            | 206                         | Bayley Scales of Infant and Toddler Development, 3rd edition (BSID-III)                                                                             | 1.28±0.04  |
| 14                        | Sudfeld (2015) <sup>31</sup>    | Tanzania             | randomized placebo-controlled trial                    | birth cohort                            | 958                         | Bayley Scales of Infant and Toddler Development, 3rd edition (BSID-III)                                                                             | 2.25±0.52  |
| 15                        | Locks                           | Tanzania             | randomized placebo-                                    | birth cohort                            | 248                         | Bayley Scales of Infant and Toddler                                                                                                                 | 1.21±0.03  |

| Study                                | Setting           | Primary study design                | Study population                                           | N<br>(data on child<br>development) | Child development tool used                                                                                                    | Child age in<br>years at<br>assessment<br>(mean±SD) |
|--------------------------------------|-------------------|-------------------------------------|------------------------------------------------------------|-------------------------------------|--------------------------------------------------------------------------------------------------------------------------------|-----------------------------------------------------|
| (2016) <sup>32</sup>                 |                   | controlled trial                    |                                                            |                                     | Development, 3rd edition (BSID-III)                                                                                            |                                                     |
| <b>Latin America</b>                 |                   |                                     |                                                            |                                     |                                                                                                                                |                                                     |
| 16 Santos IS<br>(2011) <sup>33</sup> | Brazil            | longitudinal birth<br>cohort survey | 2004 Pelotas birth<br>cohort                               | 3868                                | Battelle Screening Developmental<br>Inventory (BSDI)                                                                           | 1.99 ± 0.05                                         |
| 17 Santos<br>(2008) <sup>34</sup>    | Brazil            | longitudinal birth<br>cohort survey | Longitudinal,<br>community-based<br>cohort                 | 365                                 | Wechsler Pre-School and Primary<br>Scale of Intelligence-Revised (WPPSI-R)                                                     | 5.80±3.02                                           |
| 18 Fernald<br>(2011) <sup>35</sup>   | Ecuador           | randomized<br>effectiveness trial   | Prospective,<br>community-based<br>cohort                  | 1265                                | MacArthur-Bates Communicative<br>Development Inventory, short form,<br>Spanish version                                         | 4.59±0.87                                           |
| 19 Handal<br>(2008) <sup>36</sup>    | Ecuador           | cross-sectional                     | Community based,<br>selected using door-<br>to-door survey | 283                                 | Ages and Stages Questionnaire<br>(ASQ)                                                                                         | 2.46±1.46                                           |
| 20 Braun<br>(2012) <sup>37</sup>     | Mexico            | prospective cohort study            | prospective, facility-<br>based cohort                     | 1032                                | Bayley Scales of Infant and Toddler<br>Development, 2nd edition (BSID-II)<br>McCarthy Scales of Children's Abilities<br>(MSCA) | 2.02±0.03                                           |
| <b>Europe</b>                        |                   |                                     |                                                            |                                     |                                                                                                                                |                                                     |
| 21 Akman<br>(2004) <sup>38</sup>     | Europe-<br>Turkey | randomized clinical trial           | facility-based<br>hospital                                 | 108                                 | Bayley Scales of Infant and Toddler<br>Development, 1st edition (BSID-I)                                                       | 1.42±0.59                                           |

Table 2: Summary results of meta-analysis of associations of parental factors and cognitive, motor and language developments

| Risk Factor                            | Cognitive      |                                    |                 |                    | Motor          |                                    |                 |                    | Language       |                                    |                 |                    |
|----------------------------------------|----------------|------------------------------------|-----------------|--------------------|----------------|------------------------------------|-----------------|--------------------|----------------|------------------------------------|-----------------|--------------------|
|                                        | No. of studies | Adjusted <sup>1</sup> SMD (95% CI) | <i>p</i> -value | I <sup>2</sup> (%) | No. of studies | Adjusted <sup>1</sup> SMD (95% CI) | <i>p</i> -value | I <sup>2</sup> (%) | No. of studies | Adjusted <sup>1</sup> SMD (95% CI) | <i>p</i> -value | I <sup>2</sup> (%) |
| <b>Mother's education</b>              |                |                                    |                 |                    |                |                                    |                 |                    |                |                                    |                 |                    |
| No education (<1 years)                | 15             | -0.12 (-0.24, -0.008)              | 0.05            | 50.8               | 18             | -0.07 (-0.13, -0.01)               | 0.03            | 18.2               | 5              | -0.06 (-0.21, -0.09)               | 0.49            | 35.5               |
| Primary (1- <6 years)                  |                | Reference                          |                 |                    |                | Reference                          |                 |                    |                | Reference                          |                 |                    |
| Secondary (6- <10 years)               | 17             | 0.14 (0.05, 0.24)                  | < 0.01          | 59.7               | 19             | 0.12 (0.06, 0.18)                  | < 0.01          | 51.8               | 5              | 0.13 (0.04, 0.21)                  | 0.04            | 0.0                |
| Higher (≥10 years)                     | 17             | 0.36 (0.19, 0.48)                  | < 0.01          | 65.8               | 19             | 0.26 (0.14, 0.38)                  | < 0.01          | 70.6               | 5              | 0.21 (0.09, 0.33)                  | 0.03            | 0.0                |
| <b>Father's education</b>              |                |                                    |                 |                    |                |                                    |                 |                    |                |                                    |                 |                    |
| No education (<1 years)                | 13             | -0.005 (-0.08, 0.07)               | 0.91            | 0.0                | 17             | -0.08 (-0.11, -0.04)               | < 0.01          | 0.0                | 4              | 0.02 (-0.15, 0.20)                 | 0.80            | 30.0               |
| Primary (1- <6 years)                  |                | Reference                          |                 |                    |                | Reference                          |                 |                    |                | Reference                          |                 |                    |
| Secondary (6- <10 years)               | 15             | 0.06 (0.015, 0.11)                 | 0.02            | 0.0                | 17             | 0.08 (0.03, 0.13)                  | < 0.01          | 30.3               | 4              | 0.09 (0.02, 0.16)                  | 0.08            | 0.0                |
| Higher (≥10 years)                     | 15             | 0.15 (0.08, 0.21)                  | < 0.01          | 0.0                | 17             | 0.18 (0.10, 0.26)                  | < 0.01          | 42.3               | 4              | 0.22 (0.11, 0.32)                  | 0.03            | 17.9               |
| <b>Mother's age</b>                    |                |                                    |                 |                    |                |                                    |                 |                    |                |                                    |                 |                    |
| <15 years                              | 5              | -0.06 (-0.13, 0.25)                | 0.57            | 0.0                | 5              | 0.12 (-0.06, 0.30)                 | 0.25            | 0.0                | 2              | n/a                                | n/a             | n/a                |
| 15-<20 years                           | 18             | -0.007 (-0.06, 0.05)               | 0.80            | 10.7               | 20             | -0.02 (-0.11, 0.08)                | 0.75            | 83.6               | 6              | 0.01 (-0.09, 0.11)                 | 0.85            | 37.0               |
| 20-34 years                            |                | Reference                          |                 |                    |                | Reference                          |                 |                    |                | Reference                          |                 |                    |
| ≥35 years                              | 18             | -0.01 (-0.06, 0.04)                | 0.58            | 0.0                | 20             | -0.006 (-0.07, 0.05)               | 0.85            | 50.1               | 6              | 0.02 (-0.05, 0.09)                 | 0.59            | 0.0                |
| <b>Mother's height</b>                 |                |                                    |                 |                    |                |                                    |                 |                    |                |                                    |                 |                    |
| <145 cm                                | 11             | -0.10 (-0.20, -0.004)              | 0.07            | 0.0                | 13             | -0.11 (-0.19, -0.03)               | 0.02            | 21.5               | 5              | -0.11 (-0.31, 0.09)                | 0.35            | 0.0                |
| 145 -<150 cm                           | 13             | -0.11 (-0.19, -0.02)               | 0.03            | 27.1               | 15             | -0.07 (-0.16, 0.03)                | 0.17            | 71.1               | 5              | -0.06 (-0.13, 0.06)                | 0.52            | 0.0                |
| 150- <155 cm                           | 13             | -0.09 (-0.14, -0.04)               | < 0.01          | 3.3                | 15             | -0.04 (-0.09, 0.009)               | 0.14            | 31.5               | 5              | -0.05 (-0.12, 0.02)                | 0.22            | 0.0                |
| >155 cm                                |                | Reference                          |                 |                    |                | Reference                          |                 |                    |                | Reference                          |                 |                    |
| <b>Mother's BMI (kg/m<sup>2</sup>)</b> |                |                                    |                 |                    |                |                                    |                 |                    |                |                                    |                 |                    |

| Risk Factor                            | Cognitive      |                                    |                 |                    | Motor          |                                    |                 |                    | Language       |                                    |                 |                    |
|----------------------------------------|----------------|------------------------------------|-----------------|--------------------|----------------|------------------------------------|-----------------|--------------------|----------------|------------------------------------|-----------------|--------------------|
|                                        | No. of studies | Adjusted <sup>1</sup> SMD (95% CI) | <i>p</i> -value | I <sup>2</sup> (%) | No. of studies | Adjusted <sup>1</sup> SMD (95% CI) | <i>p</i> -value | I <sup>2</sup> (%) | No. of studies | Adjusted <sup>1</sup> SMD (95% CI) | <i>p</i> -value | I <sup>2</sup> (%) |
| <18.5                                  | 11             | -0.11 (-0.20, -0.02)               | 0.03            | 12.7               | 13             | -0.02 (-0.11, 0.07)                | 0.69            | 51.4               | 3              | n/a                                | n/a             | n/a                |
| 18.5 -<25                              |                | Reference                          |                 |                    |                | Reference                          |                 |                    |                | Reference                          |                 |                    |
| 25-<30                                 | 12             | 0.03 (-0.04, 0.09)                 | 0.44            | 23.3               | 14             | 0.04 (-0.03, 0.11)                 | 0.31            | 64.6               | 4              | -0.04 (-0.21, 0.13)                | 0.70            | 61.0               |
| ≥30                                    | 12             | -0.02 (-0.17, 0.14)                | 0.82            | 46.3               | 14             | -0.02 (-0.14, 0.10)                | 0.77            | 63.6               | 4              | -0.14 (-0.34, 0.06)                | 0.26            | 35.9               |
| <b>Mother's hemoglobin level (g/L)</b> |                |                                    |                 |                    |                |                                    |                 |                    |                |                                    |                 |                    |
| Normal (≥110 g/L))                     |                | Reference                          |                 |                    |                | Reference                          |                 |                    |                | Reference                          |                 |                    |
| Mild anemia (100-109 g/L)              | 4              | -0.06 (-0.15, 0.03)                | 0.28            | 0.0                | 11             | 0.06 (0.008, 0.11)                 | 0.04            | 29.7               | 1              | n/a                                | n/a             | n/a                |
| Moderate anemia (70-99 g/L)            | 4              | -0.06 (-0.19, 0.06)                | 0.39            | 0.0                | 6              | -0.01 (-0.06, 0.04)                | 0.68            | 16.3               | 1              | n/a                                | n/a             | n/a                |

<sup>1</sup>Adjusted for child's gender and age, mother's education and household wealth

**Table 3: Summary results of meta-analysis of associations of child factors and cognitive, motor and language developments, standardized scores**

| Risk Factor                                         | Cognitive      |                                    |                 |                    | Motor          |                                    |                 |                    | Language       |                                    |                 |                    |
|-----------------------------------------------------|----------------|------------------------------------|-----------------|--------------------|----------------|------------------------------------|-----------------|--------------------|----------------|------------------------------------|-----------------|--------------------|
|                                                     | No. of studies | Adjusted <sup>1</sup> SMD (95% CI) | <i>p</i> -value | I <sup>2</sup> (%) | No. of studies | Adjusted <sup>1</sup> SMD (95% CI) | <i>p</i> -value | I <sup>2</sup> (%) | No. of studies | Adjusted <sup>1</sup> SMD (95% CI) | <i>p</i> -value | I <sup>2</sup> (%) |
| <b>Birth weight (g)</b>                             |                |                                    |                 |                    |                |                                    |                 |                    |                |                                    |                 |                    |
| Normal (≥2500 g)                                    |                | Reference                          |                 |                    |                | Reference                          |                 |                    |                | Reference                          |                 |                    |
| Low (<2500 g)                                       | 14             | -0.13 (-0.20, -0.07)               | < 0.01          | 51.0               | 15             | -0.14 (-0.23, -0.06)               | < 0.01          | 66.5               | 5              | -0.11 (-0.22, 0.00)                | 0.12            | 74.6               |
| Moderate low (2000-2500 g)                          | 14             | -0.07 (-0.12, -0.03)               | < 0.01          | 17.2               | 15             | -0.11 (-0.20, -0.02)               | 0.03            | 64.0               | 5              | -0.05 (-0.10, 0.01)                | 0.20            | 29.6               |
| Very low (<2000 g)                                  | 14             | -0.27 (-0.49, -0.07)               | 0.02            | 74.0               | 13             | -0.26 (-0.40, -0.12)               | < 0.01          | 74.9               | 5              | -0.28 (-0.60, 0.05)                | 0.17            | 81.1               |
| <b>Gestational age (g)<sup>2</sup></b>              |                |                                    |                 |                    |                |                                    |                 |                    |                |                                    |                 |                    |
| Term (≥37 weeks)                                    |                | Reference                          |                 |                    |                | Reference                          |                 |                    |                | Reference                          |                 |                    |
| Late preterm (34-37 weeks)                          | 8              | -0.21 (-0.39, -0.04)               | 0.04            | 69.8               | 8              | -0.14 (-0.33, 0.04)                | 0.17            | 74.5               | 5              | -0.05 (-0.23, 0.13)                | 0.64            | 72.1               |
| Early preterm (<34 weeks)                           | 8              | -0.16 (-0.34, 0.31)                | 0.15            | 53.5               | 7              | -0.26 (-0.53, 0.006)               | 0.10            | 65.0               | 4              | -0.20 (-0.55, 0.15)                | 0.35            | 75.4               |
| <b>Size for gestational age<sup>3</sup></b>         |                |                                    |                 |                    |                |                                    |                 |                    |                |                                    |                 |                    |
| AGA (≥10 percentile)                                |                | Reference                          |                 |                    |                | Reference                          |                 |                    |                | Reference                          |                 |                    |
| Moderate SGA (3-<10 percentile)                     | 8              | -0.05 (-0.11, 0.12)                | 0.16            | 0.0                | 9              | -0.01 (-0.10, 0.07)                | 0.77            | 36.6               | 4              | -0.06 (-0.18, 0.06)                | 0.40            | 29.4               |
| Severe SGA (<3 percentile)                          | 8              | -0.09 (-0.24, 0.07)                | 0.30            | 72.0               | 9              | 0.02 (-0.09, 0.12)                 | 0.78            | 37.4               | 4              | 0.03 (-0.13, 0.19)                 | 0.73            | 37.7               |
| <b>Gestational age and Size-for-gestational age</b> |                |                                    |                 |                    |                |                                    |                 |                    |                |                                    |                 |                    |
| Term-AGA                                            |                | Reference                          |                 |                    |                | Reference                          |                 |                    |                | Reference                          |                 |                    |
| Preterm-AGA                                         | 8              | -0.14 (-0.24, -0.05)               | 0.02            | 17.0               | 9              | -0.23 (-0.42, -0.03)               | 0.05            | 76.5               | 4              | -0.02 (-0.23, 0.19)                | 0.87            | 78.0               |
| Term-SGA                                            | 8              | -0.02 (-0.10, 0.06)                | 0.66            | 44.6               | 9              | -0.007 (-0.08, 0.06)               | 0.84            | 31.4               | 4              | -0.03 (-0.12, 0.06)                | 0.55            | 9.3                |
| Preterm-SGA                                         | 5              | -0.17 (-0.29, -0.05)               | 0.05            | 0.0                | 5              | -0.15 (-0.40, 0.09)                | 0.29            | 53.1               | 3              | n/a                                | n/a             | n/a                |
| <b>Exclusive breastfeeding</b>                      |                |                                    |                 |                    |                |                                    |                 |                    |                |                                    |                 |                    |
| Yes                                                 |                | Reference                          |                 |                    |                | Reference                          |                 |                    |                | Reference                          |                 |                    |
| No                                                  | 4              | -0.02 (-0.08, 0.04)                | 0.60            | 0.0                | 4              | -0.05 (-0.13, 0.04)                | 0.36            | 16.4               | 3              | n/a                                | n/a             | n/a                |

| Risk Factor                         | Cognitive      |                                    |                 |                    | Motor          |                                    |                 |                    | Language       |                                    |                 |                    |
|-------------------------------------|----------------|------------------------------------|-----------------|--------------------|----------------|------------------------------------|-----------------|--------------------|----------------|------------------------------------|-----------------|--------------------|
|                                     | No. of studies | Adjusted <sup>1</sup> SMD (95% CI) | <i>p</i> -value | I <sup>2</sup> (%) | No. of studies | Adjusted <sup>1</sup> SMD (95% CI) | <i>p</i> -value | I <sup>2</sup> (%) | No. of studies | Adjusted <sup>1</sup> SMD (95% CI) | <i>p</i> -value | I <sup>2</sup> (%) |
| <b>Child hemoglobin level (g/L)</b> |                |                                    |                 |                    |                |                                    |                 |                    |                |                                    |                 |                    |
| Normal ( $\geq 110$ g/L)            |                | Reference                          |                 |                    |                | Reference                          |                 |                    |                | Reference                          |                 |                    |
| Mild anemia (100-109 g/L)           | 9              | -0.06 (-0.13, 0.01)                | 0.14            | 27.7               | 9              | -0.03 (-0.13, 0.07)                | 0.54            | 51.2               | 3              | n/a                                | n/a             | n/a                |
| Moderate anemia (70-99 g/L)         | 9              | -0.11 (-0.12, -0.10)               | < 0.01          | 0.0                | 9              | -0.18 (-0.28, -0.09)               | < 0.01          | 49.0               | 3              | n/a                                | n/a             | n/a                |
| <b>Access to clean water</b>        |                |                                    |                 |                    |                |                                    |                 |                    |                |                                    |                 |                    |
| Yes                                 |                | Reference                          |                 |                    |                | Reference                          |                 |                    |                | Reference                          |                 |                    |
| No                                  | 8              | -0.10 (-0.12, -0.09)               | < 0.01          | 0.0                | 8              | -0.07 (-0.16, 0.01)                | 0.14            | 71.0               | 4              | -0.15 (-0.35, 0.05)                | 0.23            | 82.5               |
| <b>Access to sanitation</b>         |                |                                    |                 |                    |                |                                    |                 |                    |                |                                    |                 |                    |
| Yes                                 |                | Reference                          |                 |                    |                | Reference                          |                 |                    |                | Reference                          |                 |                    |
| No                                  | 8              | -0.13 (-0.18, -0.07)               | < 0.01          | 47.5               | 8              | -0.10 (-0.19, -0.01)               | 0.05            | 82.8               | 4              | -0.12 (-0.27, 0.03)                | 0.21            | 92.4               |
| <b>Diarrhoea</b>                    |                |                                    |                 |                    |                |                                    |                 |                    |                |                                    |                 |                    |
| Yes                                 | 5              | -0.02 (-0.16, 0.13)                | 0.84            | 66.8               | 5              | -0.02 (-0.14, 0.09)                | 0.71            | 62.8               | 2              | n/a                                | n/a             | n/a                |
| No                                  |                | Reference                          |                 |                    |                | Reference                          |                 |                    |                | Reference                          |                 |                    |

<sup>1</sup>Adjusted for child's gender and age, mother's education and household wealth

<sup>2</sup>Adjusted for small for gestational age

<sup>3</sup>Adjusted for gestational age

AGA: Appropriate for Gestational Age

SGA: Small for Gestational Age

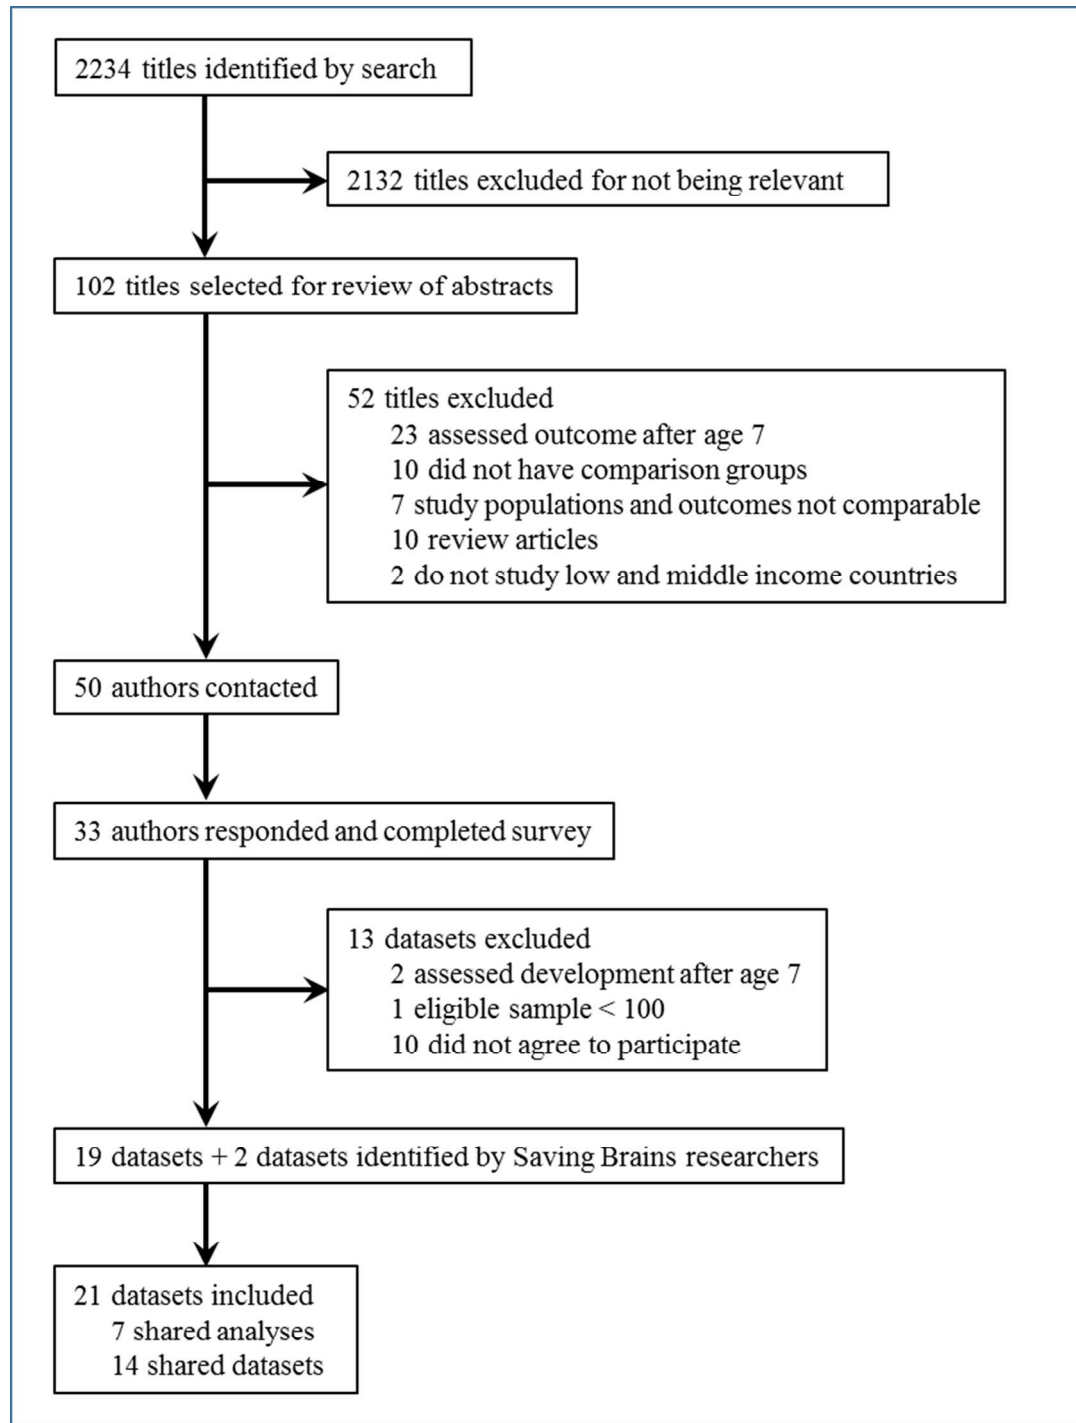

48 **Figure 2: flow chart of study selection**

49

50

51

52

53

54

55

56

57

58

59

60

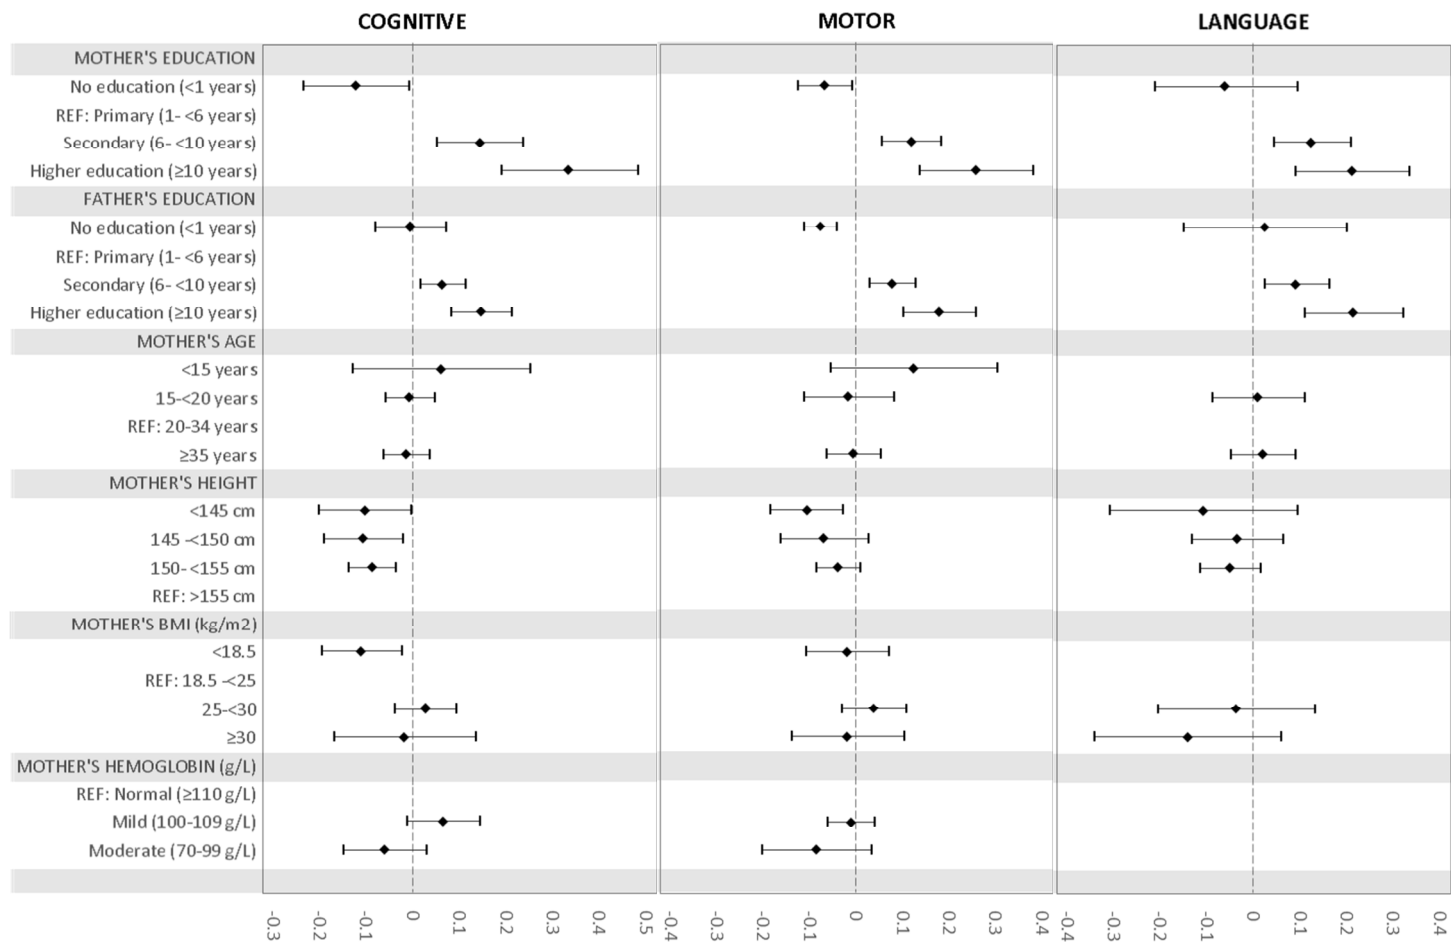

Figure 3, Panel A: Pooled estimates of association between maternal factors and development



1  
2  
3  
4  
5  
6  
7  
8  
9  
10  
11  
12  
13  
14  
15  
16  
17  
18  
19  
20  
21  
22  
23  
24  
25  
26  
27  
28  
29  
30  
31  
32  
33  
34  
35  
36  
37  
38  
39  
40  
41  
42  
43  
44  
45  
46  
47

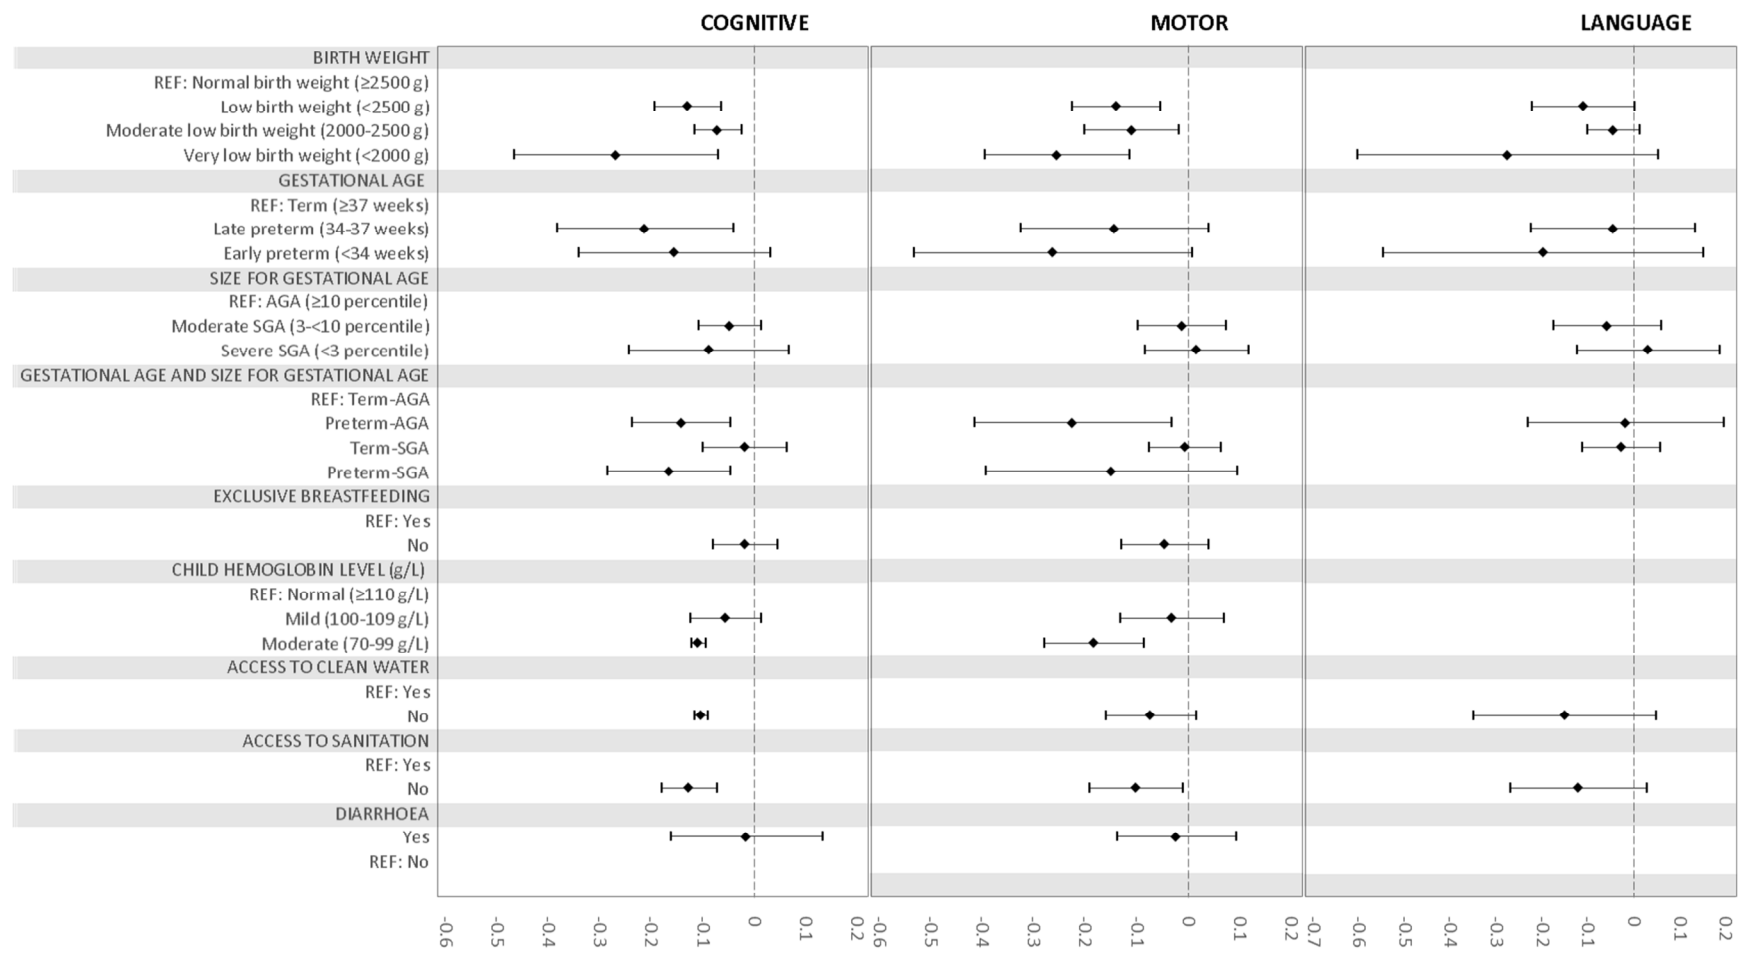

Figure 2, Panel B: Pooled estimates of association between child factors and development

## References

1. Black MM, Walker SP, Fernald LC, et al. Early childhood development coming of age: science through the life course. *Lancet* 2017;389(10064):77-90. doi: 10.1016/S0140-6736(16)31389-7
2. Lu C, Black MM, Richter LM. Risk of poor development in young children in low-income and middle-income countries: an estimation and analysis at the global, regional, and country level. *Lancet Glob Health* 2016;4(12):e916-e22. doi: 10.1016/S2214-109X(16)30266-2
3. McCoy DC, Peet ED, Ezzati M, et al. Early Childhood Developmental Status in Low- and Middle-Income Countries: National, Regional, and Global Prevalence Estimates Using Predictive Modeling. *PLoS Med* 2016;13(6):e1002034. doi: 10.1371/journal.pmed.1002034
4. Knudsen EI. Sensitive periods in the development of the brain and behavior. *J Cogn Neurosci* 2004;16(8):1412-25. doi: 10.1162/0898929042304796
5. Shonkoff JP, Boyce WT, McEwen BS. Neuroscience, molecular biology, and the childhood roots of health disparities: building a new framework for health promotion and disease prevention. *JAMA* 2009;301(21):2252-9. doi: 10.1001/jama.2009.754
6. Peet ED, McCoy DC, Danaei G, et al. Early Childhood Development and Schooling Attainment: Longitudinal Evidence from British, Finnish and Philippine Birth Cohorts. *PLoS One* 2015;10(9):e0137219. doi: 10.1371/journal.pone.0137219
7. Case A, Paxson C. Stature and status: Height, ability, and labor market outcomes. *J Polit Econ* 2008;116(3):499-532. doi: 10.1086/589524
8. Engle PL, Black MM, Behrman JR, et al. Strategies to avoid the loss of developmental potential in more than 200 million children in the developing world. *Lancet* 2007;369(9557):229-42. doi: 10.1016/S0140-6736(07)60112-3
9. Grantham-McGregor S, Cheung YB, Cueto S, et al. Developmental potential in the first 5 years for children in developing countries. *Lancet* 2007;369(9555):60-70. doi: 10.1016/S0140-6736(07)60032-4
10. Fink G, Peet E, Danaei G, et al. Schooling and wage income losses due to early-childhood growth faltering in developing countries: national, regional, and global estimates. *Am J Clin Nutr* 2016;104(1):104-12. doi: 10.3945/ajcn.115.123968
11. UN. The 2030 Agenda for Sustainable Development. In: Nations U, ed. New York: United Nations, 2015.
12. Danaei G, Andrews KG, Sudfeld CR, et al. Risk Factors for Childhood Stunting in 137 Developing Countries: A Comparative Risk Assessment Analysis at Global, Regional, and Country Levels. *PLoS Med* 2016;13(11):e1002164. doi: 10.1371/journal.pmed.1002164
13. Walker SP, Wachs TD, Gardner JM, et al. Child development: risk factors for adverse outcomes in developing countries. *Lancet* 2007;369(9556):145-57. doi: 10.1016/S0140-6736(07)60076-2
14. Walker SP, Wachs TD, Grantham-McGregor S, et al. Inequality in early childhood: risk and protective factors for early child development. *Lancet* 2011;378(9799):1325-38. doi: 10.1016/S0140-6736(11)60555-2
15. Prado EL, Abbeddou S, Yakes Jimenez E, et al. Effects of an intervention on infant growth and development: evidence for different mechanisms at work. *Matern Child Nutr* 2016 doi: 10.1111/mcn.12314
16. Sudfeld CR, McCoy DC, Danaei G, et al. Linear growth and child development in low- and middle-income countries: a meta-analysis. *Pediatrics* 2015;135(5):e1266-75. doi: 10.1542/peds.2014-3111
17. DerSimonian R, Laird N. Meta-analysis in clinical trials. *Control Clin Trials* 1986;7(3):177-88.
18. Black MM, Baqui AH, Zaman K, et al. Iron and zinc supplementation promote motor development and exploratory behavior among Bangladeshi infants. *Am J Clin Nutr* 2004;80(4):903-10.

19. Tofail F, Persson LA, El Arifeen S, et al. Effects of prenatal food and micronutrient supplementation on infant development: a randomized trial from the Maternal and Infant Nutrition Interventions, Matlab (MINIMat) study. *Am J Clin Nutr* 2008;87(3):704-11.
20. Tofail F, Hamadani JD, Ahmed AZ, et al. The mental development and behavior of low-birth-weight Bangladeshi infants from an urban low-income community. *Eur J Clin Nutr* 2012;66(2):237-43.
21. Taneja S, Bhandari N, Bahl R, et al. Impact of zinc supplementation on mental and psychomotor scores of children aged 12 to 18 months: a randomized, double-blind trial. *J Pediatr* 2005;146(4):506-11.
22. Kvestad I, Taneja S, Hysing M, et al. Diarrhea, stimulation and growth predict neurodevelopment in young North Indian children. *PLoS One* 2015;10(3):e0121743. doi: 10.1371/journal.pone.0121743
23. Yousafzai AK, Rasheed MA, Rizvi A, et al. Effect of integrated responsive stimulation and nutrition interventions in the Lady Health Worker programme in Pakistan on child development, growth, and health outcomes: a cluster-randomised factorial effectiveness trial. *Lancet* 2014;384(9950):1282-93. doi: 10.1016/S0140-6736(14)60455-4
24. Duazo P, Avila J, Kuzawa CW. Breastfeeding and later psychosocial development in the Philippines. *Am J Hum Biol* 2010;22(6):725-30.
25. Villegas L, McGready R, Htway M, et al. Chloroquine prophylaxis against vivax malaria in pregnancy: a randomized, double-blind, placebo-controlled trial. *Trop Med Int Health* 2007;12(2):209-18.
26. Shapiro RL, Kitch D, Ogwu A, et al. HIV transmission and 24-month survival in a randomized trial of HAART to prevent MTCT during pregnancy and breastfeeding in Botswana. *AIDS* 2013;27(12):1911-20.
27. Bogale A, Abebe Y, Stoecker BJ, et al. Iodine status and cognitive function of women and their five year-old children in rural Sidama, southern Ethiopia. *East Afr J Public Health* 2009;6(3):296-9.
28. Gladstone M, White S, Kafulafula G, et al. Post-neonatal mortality, morbidity, and developmental outcome after ultrasound-dated preterm birth in rural Malawi: a community-based cohort study. *PLoS Med* 2011;8(11):e1001121.
29. McDonald CM, Manji KP, Kupka R, et al. Stunting and wasting are associated with poorer psychomotor and mental development in HIV-exposed Tanzanian infants. *J Nutr* 2013;143(2):204-14. doi: 10.3945/jn.112.168682
30. Manji KP, McDonald CM, Kupka R, et al. Effect of multivitamin supplementation on the neurodevelopment of HIV-exposed Tanzanian infants: a randomized, double-blind, placebo-controlled clinical trial. *J Trop Pediatr* 2014;60(4):279-86. doi: 10.1093/tropej/fmu011
31. Sudfeld CR, McCoy DC, Fink G, et al. Malnutrition and Its Determinants Are Associated with Suboptimal Cognitive, Communication, and Motor Development in Tanzanian Children. *J Nutr* 2015;145(12):2705-14. doi: 10.3945/jn.115.215996
32. Locks LM, Manji KP, McDonald CM, et al. Effect of zinc and multivitamin supplementation on the growth of Tanzanian children aged 6-84 wk: a randomized, placebo-controlled, double-blind trial. *Am J Clin Nutr* 2016 doi: 10.3945/ajcn.115.120055
33. Santos IS, Barros AJ, Matijasevich A, et al. Cohort profile: the 2004 Pelotas (Brazil) birth cohort study. *Int J Epidemiol* 2011;40(6):1461-8. doi: 10.1093/ije/dyq130
34. Santos DN, Assis AM, Bastos AC, et al. Determinants of cognitive function in childhood: a cohort study in a middle income context. *BMC Public Health* 2008;8:202.
35. Fernald LC, Hidrobo M. Effect of Ecuador's cash transfer program (Bono de Desarrollo Humano) on child development in infants and toddlers: a randomized effectiveness trial. *Soc Sci Med* 2011;72(9):1437-46.

- 1  
2  
3 36. Handal AJ, Harlow SD, Breilh J, et al. Occupational exposure to pesticides during pregnancy and  
4 neurobehavioral development of infants and toddlers. *Epidemiology* 2008;19(6):851-9. doi:  
5 10.1097/EDE.0b013e318187cc5d  
6  
7 37. Braun JM, Hoffman E, Schwartz J, et al. Assessing windows of susceptibility to lead-induced cognitive  
8 deficits in Mexican children. *Neurotoxicology* 2012;33(5):1040-7.  
9  
10 38. Akman M, Cebeci D, Okur V, et al. The effects of iron deficiency on infants' developmental test  
11 performance. *Acta Paediatr* 2004;93(10):1391-6.  
12  
13 39. Patra K, Greene MM, Patel AL, et al. Maternal Education Level Predicts Cognitive, Language, and  
14 Motor Outcome in Preterm Infants in the Second Year of Life. *Am J Perinatol* 2016;33(8):738-44.  
15 doi: 10.1055/s-0036-1572532  
16  
17 40. Vollmer S, Bommer C, Krishna A, et al. The association of parental education with childhood  
18 undernutrition in low- and middle-income countries: comparing the role of paternal and  
19 maternal education. *Int J Epidemiol* 2016 doi: 10.1093/ije/dyw133  
20  
21 41. Pancsofar N, Vernon-Feagans L, The Family Life Project I. Fathers' Early Contributions to Children's  
22 Language Development in Families from Low-income Rural Communities. *Early Child Res Q*  
23 2010;25(4):450-63. doi: 10.1016/j.ecresq.2010.02.001  
24  
25 42. Carneiro P, Meghir C, Parey M. Maternal education, home environments, and the development of  
26 children and adolescents *Journal of the European Economic Association* 2013;11:123-60. doi:  
27 10.1111/j.1542-4774.2012.01096.x  
28  
29 43. Fein SB, Labiner-Wolfe J, Scanlon KS, et al. Selected complementary feeding practices and their  
30 association with maternal education. *Pediatrics* 2008;122 Suppl 2:S91-7. doi:  
31 10.1542/peds.2008-1315l  
32  
33 44. Simkhada B, Teijlingen ER, Porter M, et al. Factors affecting the utilization of antenatal care in  
34 developing countries: systematic review of the literature. *J Adv Nurs* 2008;61(3):244-60. doi:  
35 10.1111/j.1365-2648.2007.04532.x  
36  
37 45. Di Cesare M, Sabates R, Lewin KM. A double prevention: How maternal education can affect  
38 maternal mental health, child health and child cognitive development. *2013* 2013;4(3):14. doi:  
39 10.14301/llcs.v4i3.233 [published Online First: 2013-10-28]  
40  
41 46. Makoka D, Masibo PK. Is there a threshold level of maternal education sufficient to reduce child  
42 undernutrition? Evidence from Malawi, Tanzania and Zimbabwe. *BMC Pediatr* 2015;15:96. doi:  
43 10.1186/s12887-015-0406-8  
44  
45 47. de Souza N, Sardessai V, Joshi K, et al. The determinants of compliance with an early intervention  
46 programme for high-risk babies in India. *Child Care Health Dev* 2006;32(1):63-72. doi:  
47 10.1111/j.1365-2214.2006.00576.x  
48  
49 48. Barros AJ, Matijasevich A, Santos IS, et al. Child development in a birth cohort: effect of child  
50 stimulation is stronger in less educated mothers. *Int J Epidemiol* 2010;39(1):285-94. doi:  
51 10.1093/ije/dyp272  
52  
53 49. de Jong M, Verhoeven M, van Baar AL. School outcome, cognitive functioning, and behaviour  
54 problems in moderate and late preterm children and adults: a review. *Semin Fetal Neonatal*  
55 *Med* 2012;17(3):163-9. doi: 10.1016/j.siny.2012.02.003  
56  
57 50. McGowan JE, Alderdice FA, Holmes VA, et al. Early childhood development of late-preterm infants: a  
58 systematic review. *Pediatrics* 2011;127(6):1111-24. doi: 10.1542/peds.2010-2257  
59  
60 51. Aarnoudse-Moens CS, Weisglas-Kuperus N, van Goudoever JB, et al. Meta-analysis of  
neurobehavioral outcomes in very preterm and/or very low birth weight children. *Pediatrics*  
2009;124(2):717-28. doi: 10.1542/peds.2008-2816  
52  
53 52. de Kieviet JF, Piek JP, Aarnoudse-Moens CS, et al. Motor development in very preterm and very low-  
54 birth-weight children from birth to adolescence: a meta-analysis. *JAMA* 2009;302(20):2235-42.  
55 doi: 10.1001/jama.2009.1708  
56  
57  
58  
59  
60

- 1  
2  
3 53. Mulder H, Pitchford NJ, Hagger MS, et al. Development of executive function and attention in  
4 preterm children: a systematic review. *Dev Neuropsychol* 2009;34(4):393-421. doi:  
5 10.1080/87565640902964524  
6  
7 54. Geldof CJ, van Wassenaer AG, de Kieviet JF, et al. Visual perception and visual-motor integration in  
8 very preterm and/or very low birth weight children: a meta-analysis. *Res Dev Disabil*  
9 2012;33(2):726-36. doi: 10.1016/j.ridd.2011.08.025  
10  
11 55. Counsell SJ, Boardman JP. Differential brain growth in the infant born preterm: current knowledge  
12 and future developments from brain imaging. *Semin Fetal Neonatal Med* 2005;10(5):403-10.  
13 doi: 10.1016/j.siny.2005.05.003  
14  
15 56. Finken MJ, Dekker FW, de Zegher F, et al. Long-term height gain of prematurely born children with  
16 neonatal growth restraint: parallelism with the growth pattern of short children born small for  
17 gestational age. *Pediatrics* 2006;118(2):640-3. doi: 10.1542/peds.2006-0103  
18  
19 57. de Kieviet JF, Zoetebier L, van Elburg RM, et al. Brain development of very preterm and very low-  
20 birthweight children in childhood and adolescence: a meta-analysis. *Dev Med Child Neurol*  
21 2012;54(4):313-23. doi: 10.1111/j.1469-8749.2011.04216.x  
22  
23 58. Mikkola K, Ritari N, Tommiska V, et al. Neurodevelopmental outcome at 5 years of age of a national  
24 cohort of extremely low birth weight infants who were born in 1996-1997. *Pediatrics*  
25 2005;116(6):1391-400. doi: 10.1542/peds.2005-0171  
26  
27 59. Blencowe H, Cousens S, Oestergaard MZ, et al. National, regional, and worldwide estimates of  
28 preterm birth rates in the year 2010 with time trends since 1990 for selected countries: a  
29 systematic analysis and implications. *Lancet* 2012;379(9832):2162-72.  
30  
31 60. Simmons LE, Rubens CE, Darmstadt GL, et al. Preventing preterm birth and neonatal mortality:  
32 exploring the epidemiology, causes, and interventions. *Semin Perinatol* 2010;34(6):408-15. doi:  
33 10.1053/j.semperi.2010.09.005  
34  
35 61. Guralnick MJ. Preventive interventions for preterm children: effectiveness and developmental  
36 mechanisms. *J Dev Behav Pediatr* 2012;33(4):352-64. doi: 10.1097/DBP.0b013e31824eaa3c  
37  
38 62. Nogel SC, Deiters L, Stemmler M, et al. Preterm small-for-gestational age children: predictive role of  
39 gestational age for mental development at the age of 2 years. *Brain Dev* 2015;37(4):394-401.  
40 doi: 10.1016/j.braindev.2014.06.012  
41  
42 63. Bickle Graz M, Tolsa JF, Fischer Fumeaux CJ. Being Small for Gestational Age: Does it Matter for the  
43 Neurodevelopment of Premature Infants? A Cohort Study. *PLoS One* 2015;10(5):e0125769. doi:  
44 10.1371/journal.pone.0125769  
45  
46 64. Tanis JC, van der Ree MH, Roze E, et al. Functional outcome of very preterm-born and small-for-  
47 gestational-age children at school age. *Pediatr Res* 2012;72(6):641-8. doi: 10.1038/pr.2012.130  
48  
49 65. Arcangeli T, Thilaganathan B, Hooper R, et al. Neurodevelopmental delay in small babies at term: a  
50 systematic review. *Ultrasound Obstet Gynecol* 2012;40(3):267-75. doi: 10.1002/uog.11112  
51  
52 66. Savchev S, Sanz-Cortes M, Cruz-Martinez R, et al. Neurodevelopmental outcome of full-term small-  
53 for-gestational-age infants with normal placental function. *Ultrasound Obstet Gynecol*  
54 2013;42(2):201-6. doi: 10.1002/uog.12391  
55  
56 67. Brandt I, Sticker EJ, Lentze MJ. Catch-up growth of head circumference of very low birth weight,  
57 small for gestational age preterm infants and mental development to adulthood. *J Pediatr*  
58 2003;142(5):463-8. doi: 10.1067/mpd.2003.149  
59  
60 68. McCowan L, Horgan RP. Risk factors for small for gestational age infants. *Best Pract Res Clin Obstet*  
61 *Gynaecol* 2009;23(6):779-93. doi: 10.1016/j.bpobgyn.2009.06.003  
62  
63 69. Lozoff B. Iron deficiency and child development. *Food Nutr Bull* 2007;28(4 Suppl):S560-71.  
64  
65 70. McLean E, Cogswell M, Egli I, et al. Worldwide prevalence of anaemia, WHO Vitamin and Mineral  
66 Nutrition Information System, 1993-2005. *Public Health Nutr* 2009;12(4):444-54. doi:  
67 10.1017/S1368980008002401  
68  
69  
70

- 1  
2  
3 71. Beard JL, Felt B, Schallert T, et al. Moderate iron deficiency in infancy: biology and behavior in young  
4 rats. *Behav Brain Res* 2006;170(2):224-32. doi: 10.1016/j.bbr.2006.02.024
- 5 72. Pasricha SR, Hayes E, Kalumba K, et al. Effect of daily iron supplementation on health in children  
6 aged 4-23 months: a systematic review and meta-analysis of randomised controlled trials.  
7 *Lancet Glob Health* 2013;1(2):e77-86. doi: 10.1016/S2214-109X(13)70046-9
- 8 73. Sachdev H, Gera T, Nestel P. Effect of iron supplementation on mental and motor development in  
9 children: systematic review of randomised controlled trials. *Public Health Nutr* 2005;8(2):117-32.
- 10 74. Koura GK, Ouedraogo S, Le Port A, et al. Anaemia during pregnancy: impact on birth outcome and  
11 infant haemoglobin level during the first 18 months of life. *Trop Med Int Health* 2012;17(3):283-  
12 91. doi: 10.1111/j.1365-3156.2011.02932.x
- 13 75. Anderson JW, Johnstone BM, Remley DT. Breast-feeding and cognitive development: a meta-  
14 analysis. *Am J Clin Nutr* 1999;70(4):525-35.
- 15 76. Horta BL, Loret de Mola C, Victora CG. Breastfeeding and intelligence: a systematic review and meta-  
16 analysis. *Acta Paediatr* 2015;104(467):14-9. doi: 10.1111/apa.13139
- 17 77. Walfisch A, Sermer C, Cressman A, et al. Breast milk and cognitive development--the role of  
18 confounders: a systematic review. *BMJ Open* 2013;3(8):e003259. doi: 10.1136/bmjopen-2013-  
19 003259
- 20 78. Ngure FM, Reid BM, Humphrey JH, et al. Water, sanitation, and hygiene (WASH), environmental  
21 enteropathy, nutrition, and early child development: making the links. *Ann N Y Acad Sci*  
22 2014;1308:118-28. doi: 10.1111/nyas.12330
- 23 79. Niehaus MD, Moore SR, Patrick PD, et al. Early childhood diarrhea is associated with diminished  
24 cognitive function 4 to 7 years later in children in a northeast Brazilian shantytown. *Am J Trop*  
25 *Med Hyg* 2002;66(5):590-3.
- 26 80. Petri WA, Jr., Miller M, Binder HJ, et al. Enteric infections, diarrhea, and their impact on function and  
27 development. *J Clin Invest* 2008;118(4):1277-90. doi: 10.1172/JCI34005
- 28 81. Aboud FE, Yousafzai AK. Global health and development in early childhood. *Annu Rev Psychol*  
29 2015;66:433-57. doi: 10.1146/annurev-psych-010814-015128
- 30  
31  
32  
33  
34  
35  
36  
37  
38  
39  
40  
41  
42  
43  
44  
45  
46  
47  
48  
49  
50  
51  
52  
53  
54  
55  
56  
57  
58  
59  
60

## Appendix 1: Search terms

("child"[MeSH] OR "infant"[MeSH]) AND ("child development"[MeSH] OR "cognition"[MeSH] OR "psychomotor disorders"[MeSH] OR "psychomotor performance"[MeSH] OR "motor skills"[MeSH] OR "intelligence"[MeSH] OR "IQ"[All Fields] OR "executive function"[MeSH] OR "attention"[MeSH] OR "memory"[MeSH] OR "learning"[MeSH] OR "education"[MeSH] OR "reading"[MeSH] OR "mathematics"[MeSH] OR "learning disorders"[MeSH] OR "aptitude tests"[MeSH] OR "language tests"[MeSH] OR "mental health"[MeSH] OR "child behavior"[MeSH] OR "emotional intelligence"[MeSH] OR "emotions"[MeSH] OR "temperament"[MeSH] OR "self concept"[MeSH] OR "self efficacy"[MeSH] OR "mental competency"[MeSH] OR "aggression"[MeSH]) AND ("preterm"[All Fields] OR "low birth weight"[All Fields] OR "maternal height" OR "maternal underweight" OR "malaria" OR "birth spacing" OR "Teen pregnancy" OR "anemia" or "hemoglobin" OR "HIV" OR "iron supplement" OR "iron deficiency" OR "childhood diarrhea" OR "HIV" OR "zinc" OR "iodine" OR "sanitation" OR "clean water" OR "breastfeeding" OR "hookworms" ) AND ("Armenia"[All Fields] OR "Azerbaijan"[All Fields] OR "Georgia"[All Fields] OR "Kazakhstan"[All Fields] OR "Kyrgyzstan"[All Fields] OR "Mongolia"[All Fields] OR "Tajikistan"[All Fields] OR "Turkmenistan"[All Fields] OR "Uzbekistan"[All Fields] OR "Afghanistan"[All Fields] OR "Bangladesh"[All Fields] OR "Bhutan"[All Fields] OR "India"[All Fields] OR "Nepal"[All Fields] OR "Pakistan"[All Fields] OR "Cambodia"[All Fields] OR "Indonesia"[All Fields] OR "Lao People's Democratic Republic"[All Fields] OR "Malaysia"[All Fields] OR "Maldives"[All Fields] OR "Mauritius"[All Fields] OR "Mayotte"[All Fields] OR "Myanmar"[All Fields] OR "Philippines"[All Fields] OR "Seychelles"[All Fields] OR "Sri Lanka"[All Fields] OR "Thailand"[All Fields] OR "Viet Nam"[All Fields] OR "Anguilla"[All Fields] OR "Antigua and Barbuda"[All Fields] OR "Aruba"[All Fields] OR "Bahamas"[All Fields] OR "Barbados"[All Fields] OR "Belize"[All Fields] OR "Bermuda"[All Fields] OR "British Virgin Islands"[All Fields] OR "Cayman Islands"[All Fields] OR "Cuba"[All Fields] OR "Turks and Caicos Islands"[All Fields] OR "Bolivia"[All Fields] OR "Ecuador"[All Fields] OR "Peru"[All Fields] OR "Colombia"[All Fields] OR "Costa Rica"[All Fields] OR "El Salvador"[All Fields] OR "Guatemala"[All Fields] OR "Honduras"[All Fields] OR "Mexico"[All Fields] OR "Nicaragua"[All Fields] OR "Panama"[All Fields] OR "Venezuela"[All Fields] OR "Argentina"[All Fields] OR "Chile"[All Fields] OR "Falkland Islands"[All Fields] OR "Malvinas"[All Fields] OR "Uruguay"[All Fields] OR "Brazil"[All Fields] OR "Paraguay"[All Fields] OR "Algeria"[All Fields] OR "Bahrain"[All Fields] OR "Egypt"[All Fields] OR "Iran"[All Fields] OR "Iraq"[All Fields] OR "Jordan"[All Fields] OR "Kuwait"[All Fields] OR "Lebanon"[All Fields] OR "Libyan Arab Jamahiriya"[All Fields] OR "Morocco"[All Fields] OR "Occupied Palestinian Territory"[All Fields] OR "Oman"[All Fields] OR "Qatar"[All Fields] OR "Saudi Arabia"[All Fields] OR "Syrian Arab Republic"[All Fields] OR "Tunisia"[All Fields] OR "Turkey"[All Fields] OR "United Arab Emirates"[All Fields] OR "Western Sahara"[All Fields] OR "Yemen"[All Fields] OR "American Samoa"[All Fields] OR "Cook Islands"[All Fields] OR "Fiji"[All Fields] OR "French Polynesia"[All Fields] OR "Guam"[All Fields] OR "Kiribati"[All Fields] OR "Marshall Islands"[All Fields] OR "Micronesia"[All Fields] OR "Nauru"[All Fields] OR "New Caledonia"[All Fields] OR "Niue"[All Fields] OR "Northern Mariana Islands"[All Fields] OR "Palau"[All Fields] OR "Papua New Guinea"[All Fields] OR "Pitcairn"[All Fields] OR "Samoa"[All Fields] OR "Solomon Islands"[All Fields] OR "Tokelau"[All Fields] OR "Tonga"[All Fields] OR "Tuvalu"[All Fields] OR "Vanuatu"[All Fields] OR "Wallis and Futuna Islands"[All Fields] OR "Angola"[All Fields] OR "Central African Republic"[All Fields] OR

1  
2  
3 "Congo"[All Fields] OR "Democratic Republic of the Congo"[All Fields] OR "Equatorial  
4 Guinea"[All Fields] OR "Gabon"[All Fields] OR "Burundi"[All Fields] OR "Comoros"[All  
5 Fields] OR "Djibouti"[All Fields] OR "Eritrea"[All Fields] OR "Ethiopia"[All Fields] OR  
6 "Kenya"[All Fields] OR "Madagascar"[All Fields] OR "Malawi"[All Fields] OR  
7 "Mozambique"[All Fields] OR "Rwanda"[All Fields] OR "Somalia"[All Fields] OR "Sudan"[All  
8 Fields] OR "Uganda"[All Fields] OR "United Republic of Tanzania"[All Fields] OR  
9 "Zambia"[All Fields] OR "Botswana"[All Fields] OR "Lesotho"[All Fields] OR "Namibia"[All  
10 Fields] OR "South Africa"[All Fields] OR "Swaziland"[All Fields] OR "Zimbabwe"[All Fields]  
11 OR "Benin"[All Fields] OR "Burkina Faso"[All Fields] OR "Cameroon"[All Fields] OR "Cape  
12 Verde"[All Fields] OR "Chad"[All Fields] OR "Cote d'Ivoire"[All Fields] OR "Gambia"[All  
13 Fields] OR "Ghana"[All Fields] OR "Guinea"[All Fields] OR "Guinea-Bissau"[All Fields] OR  
14 "Liberia"[All Fields] OR "Mali"[All Fields] OR "Mauritania"[All Fields] OR "Niger"[All Fields]  
15 OR "Nigeria"[All Fields] OR "Saint Helena"[All Fields] OR "Sao Tome and Principe"[All  
16 Fields] OR "Senegal"[All Fields] OR "Sierra Leone"[All Fields] OR "Togo"[All Fields]  
17  
18  
19  
20  
21  
22  
23  
24  
25  
26  
27  
28  
29  
30  
31  
32  
33  
34  
35  
36  
37  
38  
39  
40  
41  
42  
43  
44  
45  
46  
47  
48  
49  
50  
51  
52  
53  
54  
55  
56  
57  
58  
59  
60



## Appendix 2: Forest plots

|                                                                                                                                |    |
|--------------------------------------------------------------------------------------------------------------------------------|----|
| Figure 1: Association between low birth weight (LBW) and (reference: normal birth weight) and cognitive development. ....      | 7  |
| Figure 2: Association between Moderately low birth Weight (reference, normal birth weight) and cognitive development. ....     | 8  |
| Figure 3: Association between very low Birth weight (reference: normal birth weight)) and cognitive development. ....          | 9  |
| Figure 4: Association between child mild anemia (reference: no anemia) and cognitive development. ...                          | 10 |
| Figure 5: Association between child moderate anemia (reference: no anemia) and cognitive development. ....                     | 11 |
| Figure 6: Association between lack of access to clean water (reference: access to clean water) and cognitive development. .... | 12 |
| Figure 7: Association between lack of access to sanitation (reference: access to sanitation) and cognitive development. ....   | 13 |
| Figure 8: Association between preterm-AGA (reference: term-AGA) and cognitive development. ....                                | 14 |
| Figure 9: Association between term-SGA (reference: term-AGA) and cognitive development. ....                                   | 15 |
| Figure 10: Association between preterm- SGA (reference: term-AGA) and cognitive development. ....                              | 16 |
| Figure 11: Association between late preterm birth, 34-37 weeks (reference: term) and cognitive development. ....               | 17 |
| Figure 12: Association between early preterm birth, < 34 weeks (reference: term) and cognitive development. ....               | 18 |
| Figure 13: Association between moderate SGA (reference: AGA) and cognitive development. ....                                   | 19 |
| Figure 14: Association between severe SGA (reference: AGA) and cognitive development. ....                                     | 20 |
| Figure 15: Association between low birth weight (reference: normal birth weight) and motor development. ....                   | 21 |
| Figure 16: Association between moderately low birth weight (reference: normal birth weight) and motor development. ....        | 22 |
| Figure 17: Association between very low birth weight (reference: normal birth weight) and motor development. ....              | 23 |
| Figure 18: Association between child mild anemia (reference: no anemia) and motor development. ....                            | 24 |
| Figure 19: Association between child moderate anemia (reference: no anemia) and motor development. ....                        | 25 |
| Figure 20: Association between lack of access to clean water (reference: access to clean water) and motor development. ....    | 26 |
| Figure 21: Association between lack of access to sanitation (reference: access to sanitation) and motor development. ....      | 27 |
| Figure 22: Association between preterm-AGA (reference: term-AGA) and motor development. ....                                   | 28 |
| Figure 23: Association between term-SGA (reference: term-AGA) and motor development. ....                                      | 29 |
| Figure 24: Association between preterm-SGA (reference: term-AGA) and motor development. ....                                   | 30 |
| Figure 25: Association between late preterm birth, 34-37 weeks (reference: term) and motor development. ....                   | 31 |

|    |                                                                                                       |    |
|----|-------------------------------------------------------------------------------------------------------|----|
| 1  |                                                                                                       |    |
| 2  |                                                                                                       |    |
| 3  | Figure 26: Association between early preterm birth, < 34 weeks (reference: term) and motor            |    |
| 4  | development.....                                                                                      | 32 |
| 5  | Figure 27: Association between moderate SGA (reference: AGA) and motor development.....               | 33 |
| 6  | Figure 28: Association between severe SGA (reference: AGA) and motor development.....                 | 34 |
| 7  | Figure 29: Association between low birth weight (LBW) and (reference: normal birth weight) and        |    |
| 8  | language development. ....                                                                            | 35 |
| 9  | Figure 30: Association between moderately low birth weight and (reference: normal birth weight) and   |    |
| 10 | language development. ....                                                                            | 36 |
| 11 | Figure 31: Association between very low birth weight and (reference: normal birth weight) and         |    |
| 12 | language development. ....                                                                            | 37 |
| 13 | Figure 32: Association between lack of access to clean water (reference: access to clean water) and   |    |
| 14 | language development. ....                                                                            | 38 |
| 15 | Figure 33: Association between lack of access to sanitation (reference: access to sanitation) and     |    |
| 16 | language development. ....                                                                            | 39 |
| 17 | Figure 34: Association between preterm-AGA (reference: term-AGA) and language development.....        | 40 |
| 18 | Figure 35: Association between term-SGA (reference: term-AGA) and language development.....           | 41 |
| 19 | Figure 36: Association between late preterm birth, 34-37 weeks (reference: term) and language         |    |
| 20 | development.....                                                                                      | 42 |
| 21 | Figure 37: Association between early preterm birth, < 34 weeks (reference: term) and language         |    |
| 22 | development.....                                                                                      | 43 |
| 23 | Figure 38: Association between moderate SGA (reference: AGA) and language development. ....           | 44 |
| 24 | Figure 39: Association between severe SGA (reference: AGA) and language development. ....             | 45 |
| 25 | Figure 40: Association between no maternal education (reference: primary education) and cognitive     |    |
| 26 | development.....                                                                                      | 46 |
| 27 | Figure 41: Association between maternal secondary education (reference: primary education) and        |    |
| 28 | cognitive development. ....                                                                           | 47 |
| 29 | Figure 42: Association between maternal higher education (reference: primary education) and cognitive |    |
| 30 | development.....                                                                                      | 48 |
| 31 | Figure 43: Association between no paternal education (reference: primary education) and cognitive     |    |
| 32 | development.....                                                                                      | 49 |
| 33 | Figure 44: Association between paternal secondary education (reference: primary education) and        |    |
| 34 | cognitive development. ....                                                                           | 50 |
| 35 | Figure 45: Association between paternal higher education (reference: primary education) and cognitive |    |
| 36 | development.....                                                                                      | 51 |
| 37 | Figure 46: Association between maternal ages < 15 (reference: ages 20-34) and cognitive development.  |    |
| 38 | .....                                                                                                 | 52 |
| 39 | Figure 47: Association between maternal ages 15-20 (reference: ages 20-34) and cognitive              |    |
| 40 | development.....                                                                                      | 53 |
| 41 | Figure 48: Association between maternal ages >35 (reference: ages 20-34) and cognitive development.   |    |
| 42 | .....                                                                                                 | 54 |
| 43 | Figure 49: Association between maternal height < 145cm (reference: >155 cm) and cognitive             |    |
| 44 | development.....                                                                                      | 55 |
| 45 |                                                                                                       |    |
| 46 |                                                                                                       |    |
| 47 |                                                                                                       |    |
| 48 |                                                                                                       |    |
| 49 |                                                                                                       |    |
| 50 |                                                                                                       |    |
| 51 |                                                                                                       |    |
| 52 |                                                                                                       |    |
| 53 |                                                                                                       |    |
| 54 |                                                                                                       |    |
| 55 |                                                                                                       |    |
| 56 |                                                                                                       |    |
| 57 |                                                                                                       |    |
| 58 |                                                                                                       |    |
| 59 |                                                                                                       |    |
| 60 |                                                                                                       |    |

|    |                                                                                                                 |
|----|-----------------------------------------------------------------------------------------------------------------|
| 1  |                                                                                                                 |
| 2  |                                                                                                                 |
| 3  | Figure 50: Association between maternal height 145-150cm (reference: >155 cm) and cognitive                     |
| 4  | development..... 56                                                                                             |
| 5  | Figure 51: Association between maternal height 150-155 cm (reference: >155 cm) and cognitive                    |
| 6  | development..... 57                                                                                             |
| 7  | Figure 52: Association between maternal BMI <18.5 kg/m <sup>2</sup> (reference: 18.5-25) and cognitive          |
| 8  | development..... 58                                                                                             |
| 9  | Figure 53: Association between maternal BMI 25-30 kg/m <sup>2</sup> (reference: 18.5-25) and cognitive          |
| 10 | development..... 59                                                                                             |
| 11 | Figure 54: Association between maternal BMI >30 kg/m <sup>2</sup> (reference: 18.5-25) and cognitive            |
| 12 | development..... 60                                                                                             |
| 13 | Figure 55: Association between mild anemia in pregnancy (reference: no anemia) and cognitive                    |
| 14 | development..... 61                                                                                             |
| 15 | Figure 56: Association between maternal moderate anemia (reference: no anemia) and cognitive                    |
| 16 | development..... 62                                                                                             |
| 17 | Figure 57: Association between no maternal education (reference: primary education) and motor                   |
| 18 | development..... 63                                                                                             |
| 19 | Figure 58: Association between maternal secondary education (reference: primary education) and                  |
| 20 | motor development..... 64                                                                                       |
| 21 | Figure 59: Association between maternal higher education (reference: primary education) and motor               |
| 22 | development..... 65                                                                                             |
| 23 | Figure 60: Association between no paternal education (reference: primary education) and motor                   |
| 24 | development..... 66                                                                                             |
| 25 | Figure 61: Association between paternal secondary education (reference: primary education) and motor            |
| 26 | development..... 67                                                                                             |
| 27 | Figure 62: Association between paternal higher education (reference: primary education) and motor               |
| 28 | development..... 68                                                                                             |
| 29 | Figure 63: Association between maternal ages < 15 (reference: ages 20-34) and motor development. ... 69         |
| 30 | Figure 64: Association between maternal ages 15-20 (reference: ages 20-34) and motor development. 70            |
| 31 | Figure 65: Association between maternal ages >35 (reference: ages 20-34) and motor development. ... 71          |
| 32 | Figure 66: Association between maternal height <145 (reference: >155 cm) and motor development... 72            |
| 33 | Figure 67: Association between maternal height 145-150 (reference: >155 cm) and motor development.              |
| 34 | ..... 73                                                                                                        |
| 35 | Figure 68: Association between maternal height 150-155 (reference: >155 cm) and motor development.              |
| 36 | ..... 74                                                                                                        |
| 37 | Figure 69: Association between maternal BMI <18.5 kg/m <sup>2</sup> (reference: 18.5-25) and motor development. |
| 38 | ..... 75                                                                                                        |
| 39 | Figure 70: Association between maternal BMI <25-30 kg/m <sup>2</sup> (reference: 18.5-25) and motor             |
| 40 | development..... 76                                                                                             |
| 41 | Figure 71: Association between maternal BMI >30 kg/m <sup>2</sup> (reference: 18.5-25) and motor development.   |
| 42 | ..... 77                                                                                                        |
| 43 | Figure 72: Association between maternal mild anemia (reference: no anemia) and motor development                |
| 44 | ..... 78                                                                                                        |
| 45 |                                                                                                                 |
| 46 |                                                                                                                 |
| 47 |                                                                                                                 |
| 48 |                                                                                                                 |
| 49 |                                                                                                                 |
| 50 |                                                                                                                 |
| 51 |                                                                                                                 |
| 52 |                                                                                                                 |
| 53 |                                                                                                                 |
| 54 |                                                                                                                 |
| 55 |                                                                                                                 |
| 56 |                                                                                                                 |
| 57 |                                                                                                                 |
| 58 |                                                                                                                 |
| 59 |                                                                                                                 |
| 60 |                                                                                                                 |

|    |                                                                                                       |    |
|----|-------------------------------------------------------------------------------------------------------|----|
| 1  |                                                                                                       |    |
| 2  |                                                                                                       |    |
| 3  | Figure 73: Association between maternal moderate anemia (reference: no anemia) and motor              |    |
| 4  | development.....                                                                                      | 79 |
| 5  |                                                                                                       |    |
| 6  | Figure 74: Association between no maternal education (reference: primary education) and language      |    |
| 7  | development.....                                                                                      | 80 |
| 8  |                                                                                                       |    |
| 9  | Figure 75: Association between maternal secondary education (reference: primary education) and        |    |
| 10 | language development. ....                                                                            | 81 |
| 11 |                                                                                                       |    |
| 12 | Figure 76: Association between maternal higher education (reference: primary education) and language  |    |
| 13 | development.....                                                                                      | 82 |
| 14 |                                                                                                       |    |
| 15 | Figure 77: Association between no paternal education (reference: primary education) and language      |    |
| 16 | development.....                                                                                      | 83 |
| 17 |                                                                                                       |    |
| 18 | Figure 78: Association between paternal secondary education (reference: primary education) and        |    |
| 19 | language development. ....                                                                            | 84 |
| 20 |                                                                                                       |    |
| 21 | Figure 79: Association between paternal higher education (reference: primary education) and language  |    |
| 22 | development.....                                                                                      | 85 |
| 23 |                                                                                                       |    |
| 24 | Figure 80: Association between maternal ages 15-20 (reference: ages 20-34) and language development.  |    |
| 25 | .....                                                                                                 | 86 |
| 26 |                                                                                                       |    |
| 27 | Figure 81: Association between maternal ages >35 (reference: ages 20-34) and language development.    |    |
| 28 | .....                                                                                                 | 87 |
| 29 |                                                                                                       |    |
| 30 | Figure 82: Association between maternal height <145 cm (reference: >155 cm) and language              |    |
| 31 | development.....                                                                                      | 88 |
| 32 |                                                                                                       |    |
| 33 | Figure 83: Association between maternal height 145-150cm (reference: >155 cm) and language            |    |
| 34 | development.....                                                                                      | 89 |
| 35 |                                                                                                       |    |
| 36 | Figure 84: Association between maternal height 150-155 cm (reference: >155 cm) and language           |    |
| 37 | development.....                                                                                      | 90 |
| 38 |                                                                                                       |    |
| 39 | Figure 85: Association between maternal BMI 25-30 kg/m <sup>2</sup> (reference: 18.5-25) and language |    |
| 40 | development.....                                                                                      | 91 |
| 41 |                                                                                                       |    |
| 42 | Figure 86: Association between maternal BMI >30 kg/m <sup>2</sup> (reference: 18.5-25) and language   |    |
| 43 | development.....                                                                                      | 92 |
| 44 |                                                                                                       |    |
| 45 |                                                                                                       |    |
| 46 |                                                                                                       |    |
| 47 |                                                                                                       |    |
| 48 |                                                                                                       |    |
| 49 |                                                                                                       |    |
| 50 |                                                                                                       |    |
| 51 |                                                                                                       |    |
| 52 |                                                                                                       |    |
| 53 |                                                                                                       |    |
| 54 |                                                                                                       |    |
| 55 |                                                                                                       |    |
| 56 |                                                                                                       |    |
| 57 |                                                                                                       |    |
| 58 |                                                                                                       |    |
| 59 |                                                                                                       |    |
| 60 |                                                                                                       |    |

1. **Child Risk Factors on Child's Cognitive Development**

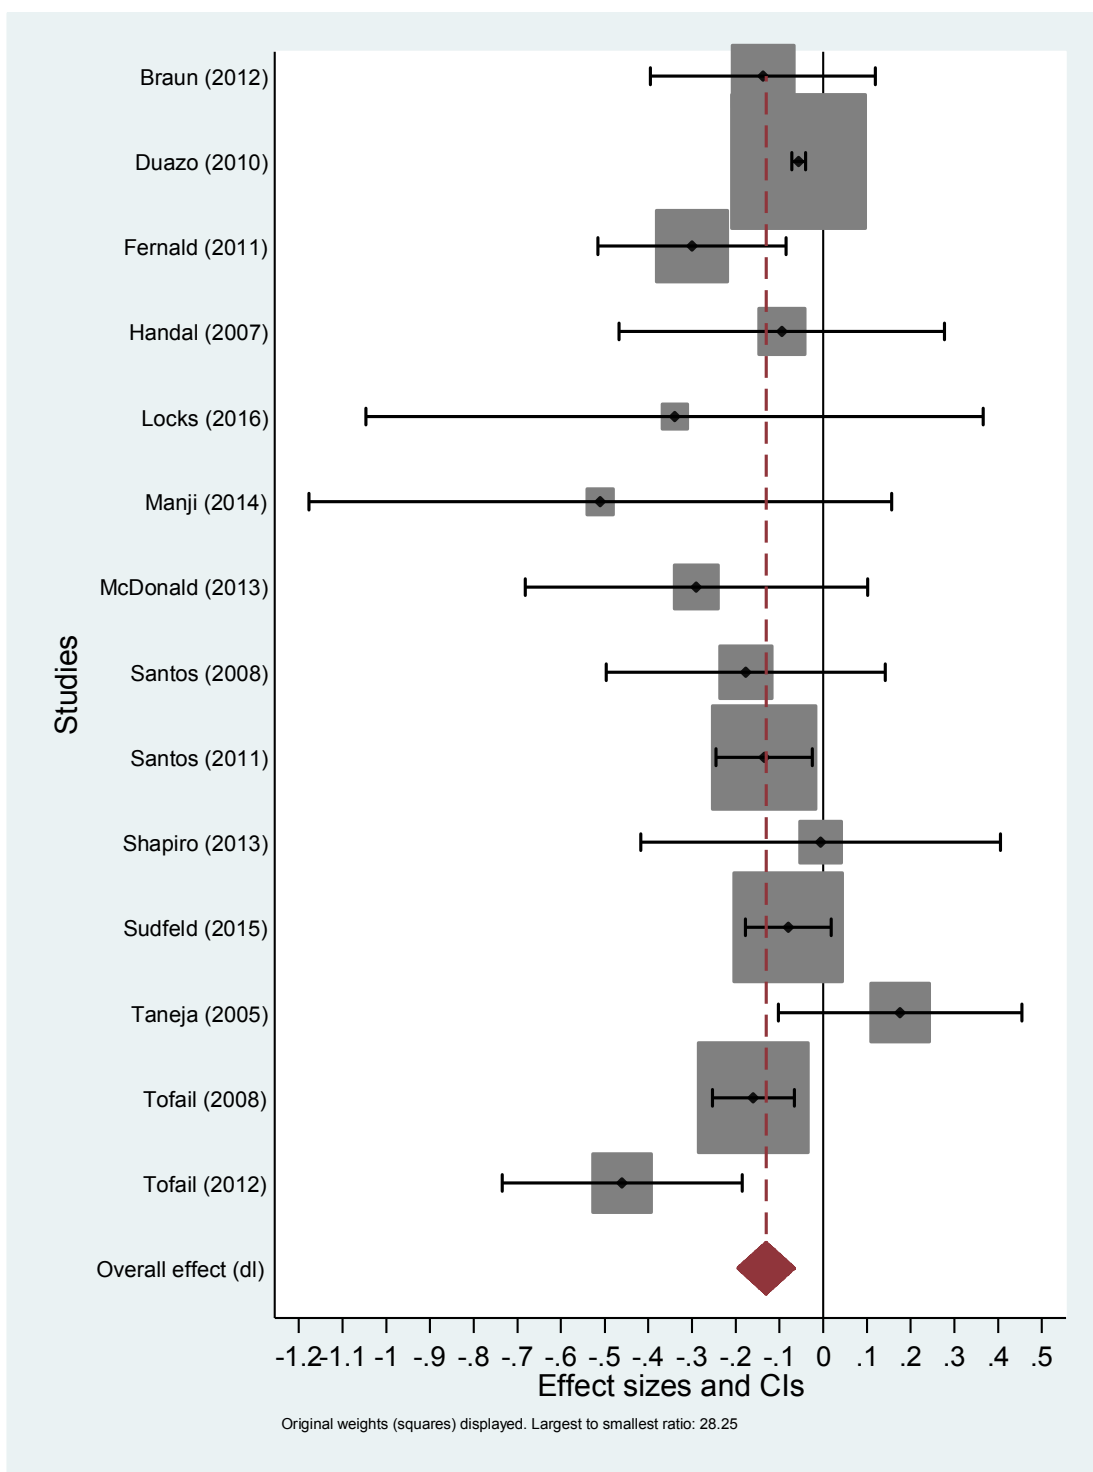

Figure 1: Association between low birth weight (LBW) and (reference: normal birth weight) and cognitive development.

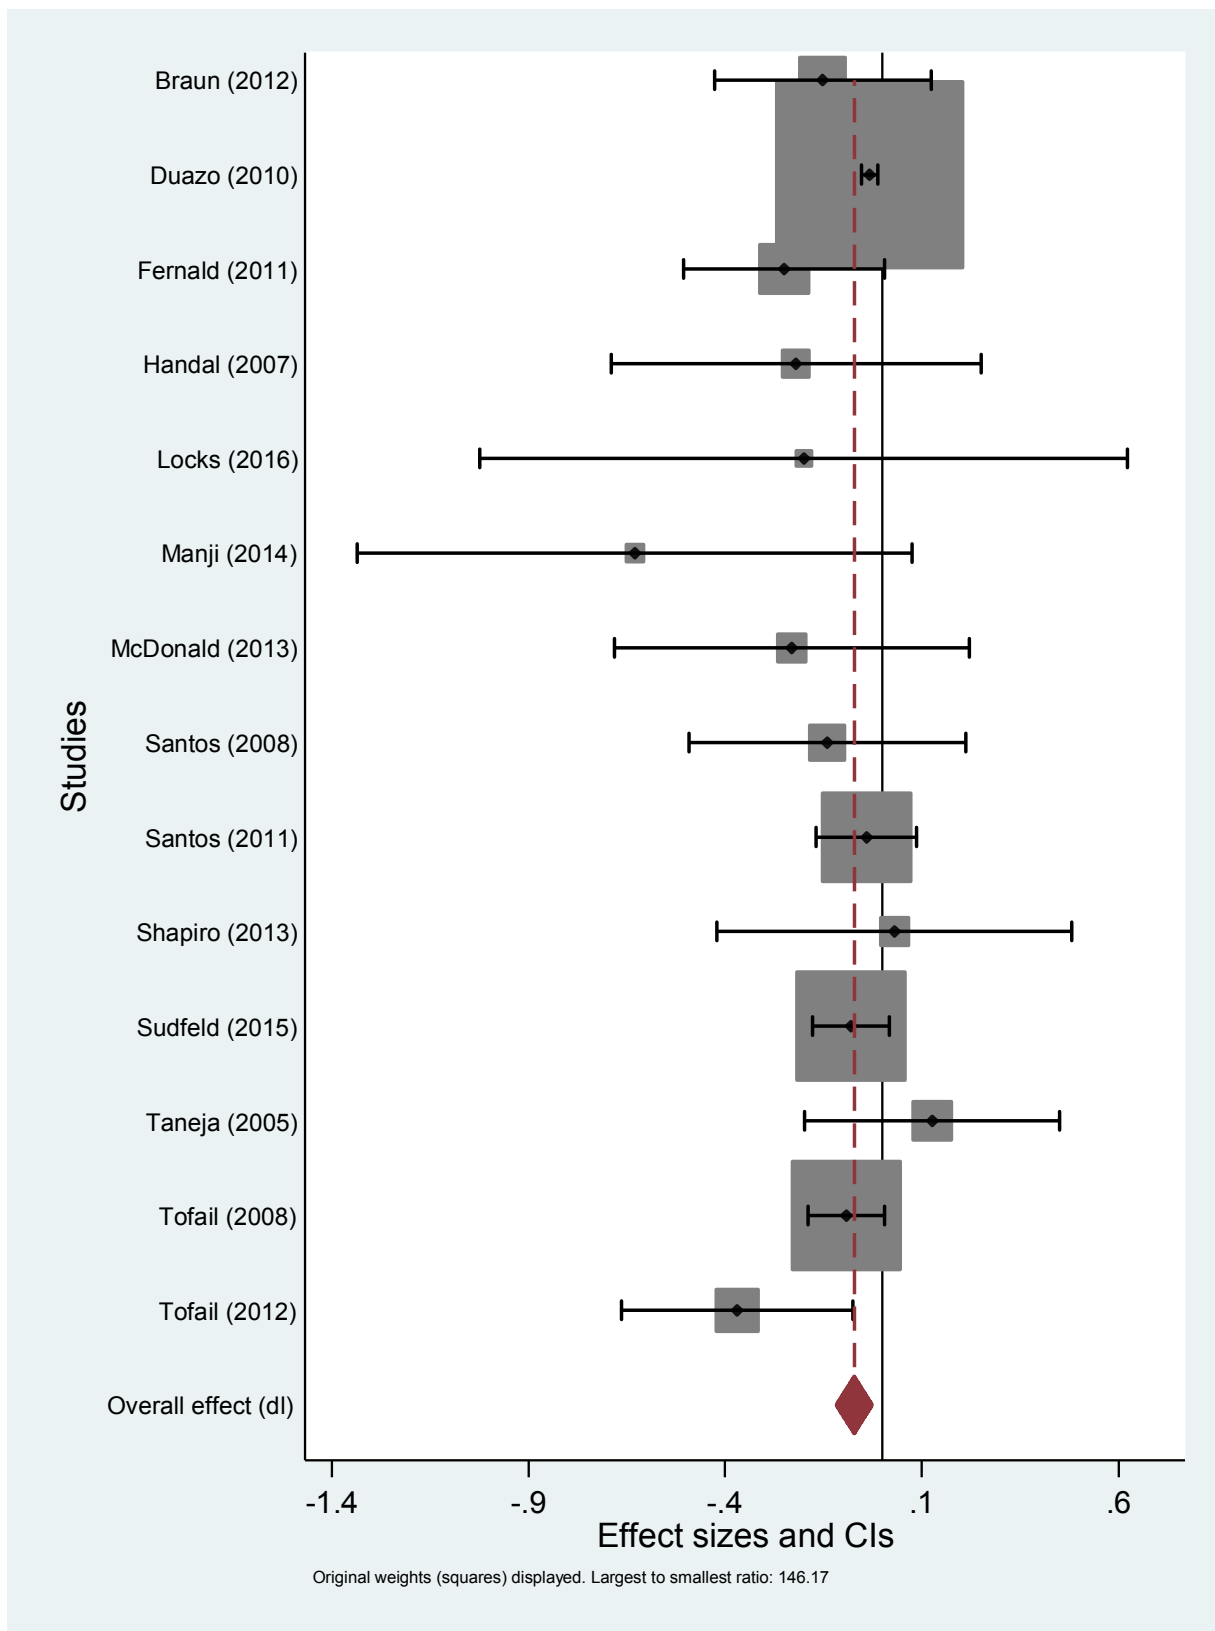

Figure 2: Association between Moderately low birth Weight (reference, normal birth weight) and cognitive development.

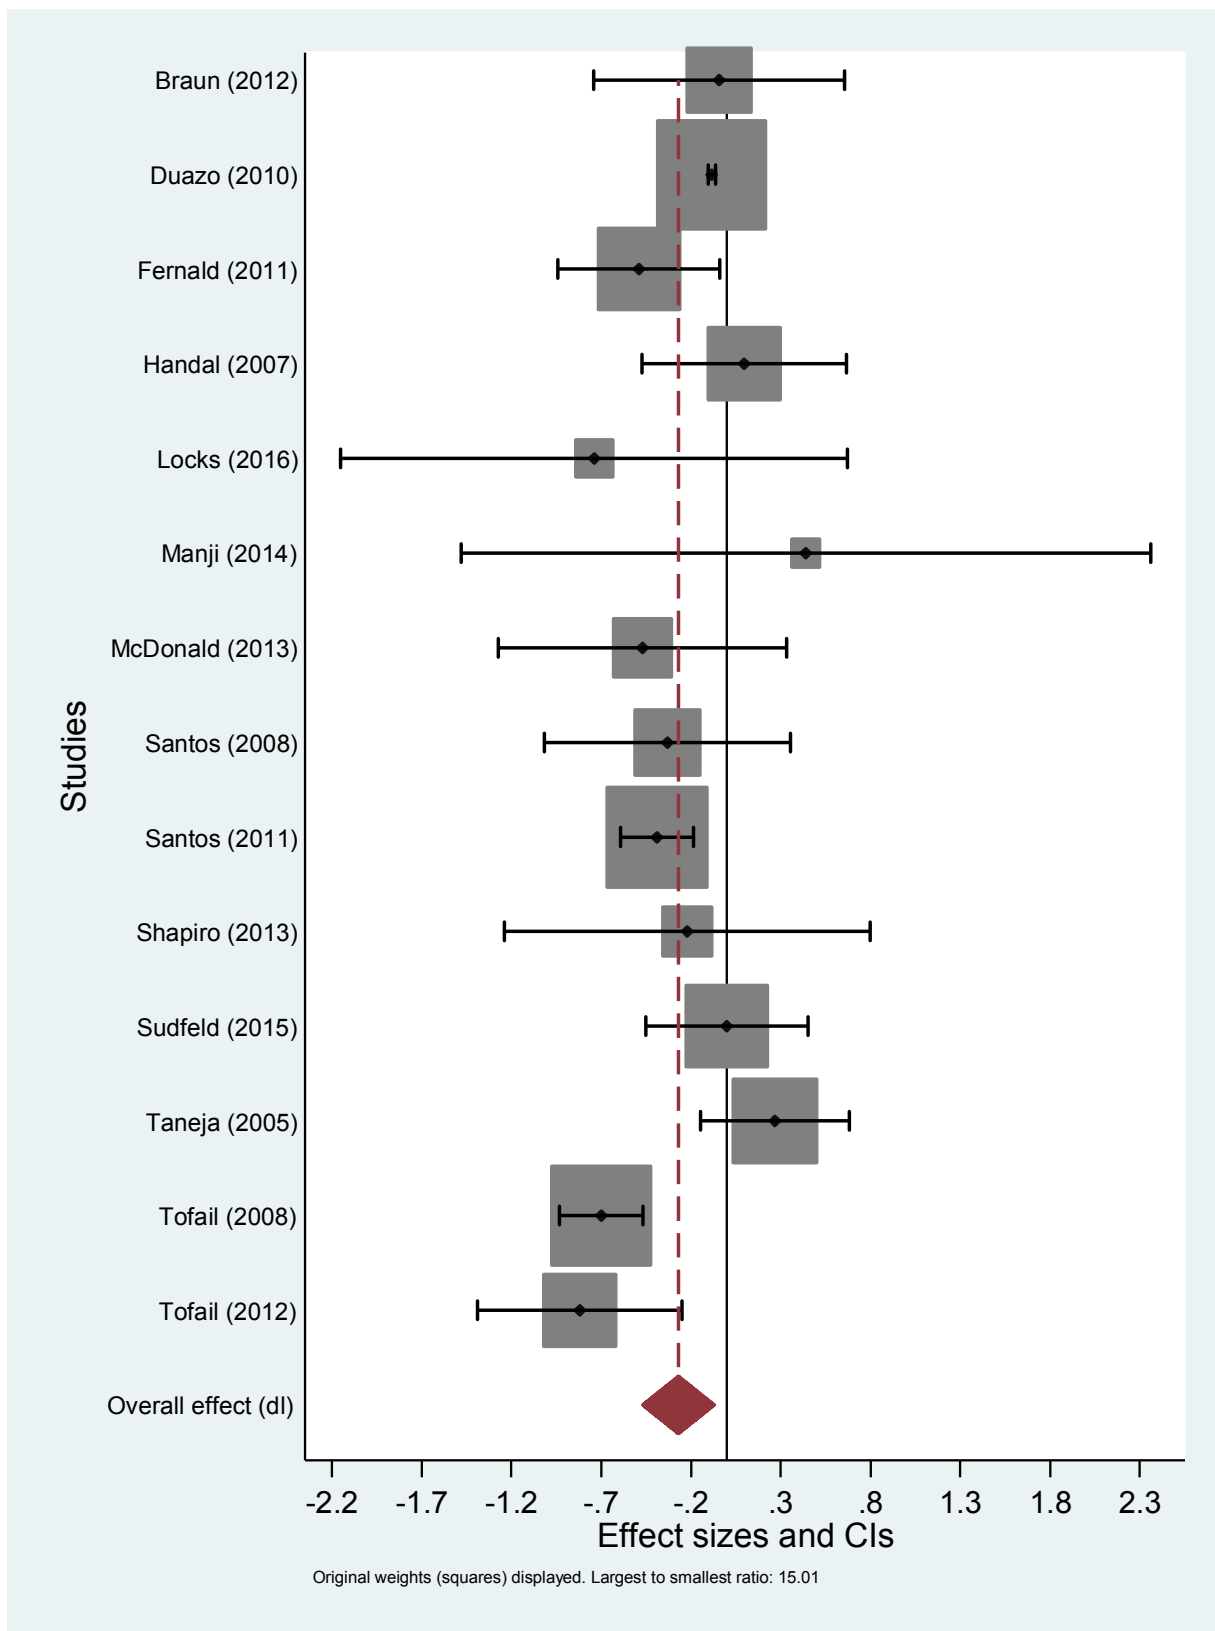

Figure 3: Association between very low Birth weight (reference: normal birth weight) and cognitive development.

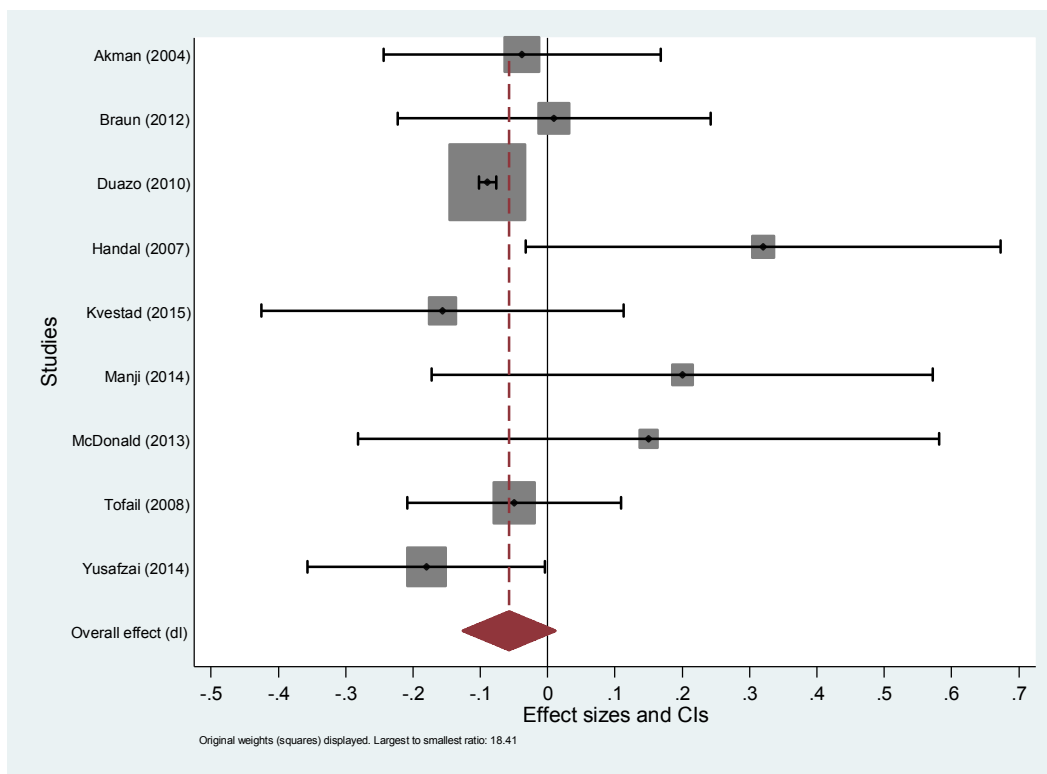

**Figure 4: Association between child mild anemia (reference: no anemia) and cognitive development.**



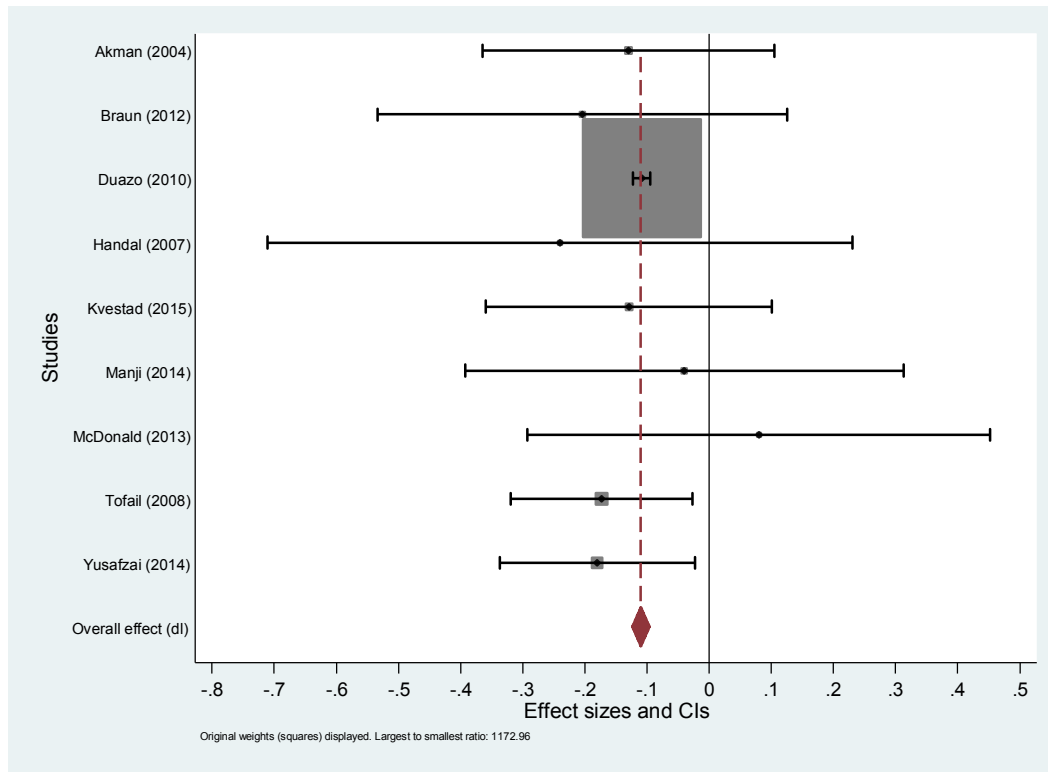

Figure 5: Association between child moderate anemia (reference: no anemia) and cognitive development.

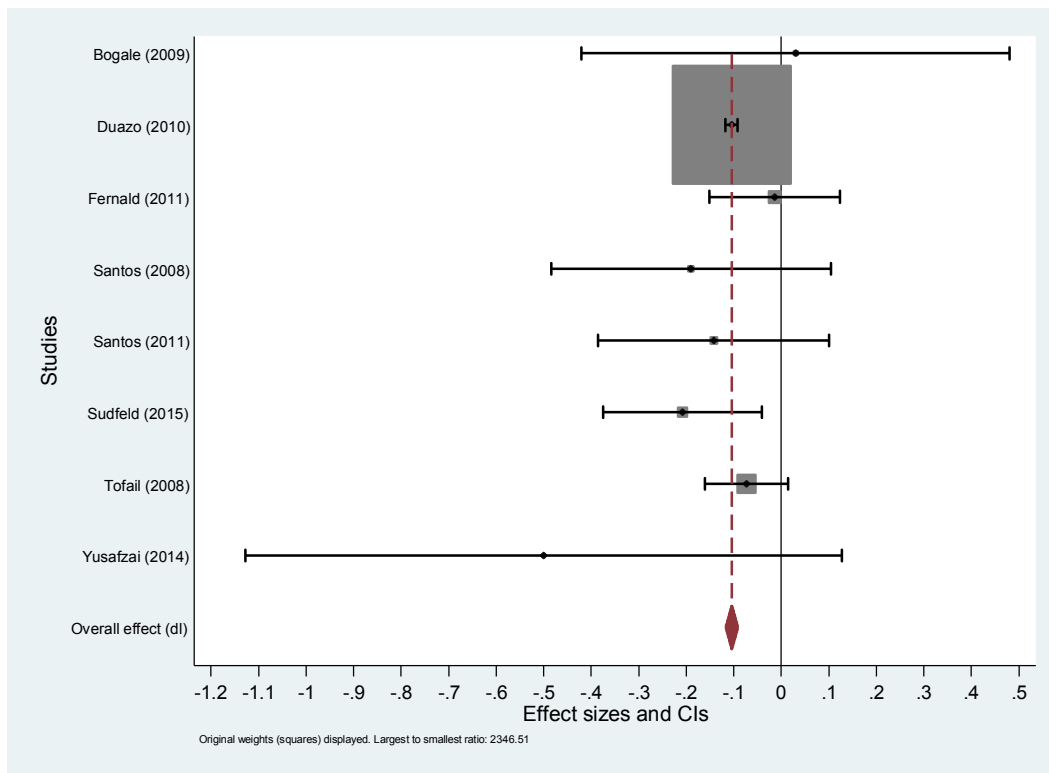

**Figure 6: Association between lack of access to clean water (reference: access to clean water) and cognitive development.**

1  
2  
3  
4  
5  
6  
7  
8  
9  
10  
11  
12  
13  
14  
15  
16  
17  
18  
19  
20  
21  
22  
23  
24  
25  
26  
27  
28  
29  
30  
31  
32  
33  
34  
35  
36  
37  
38  
39  
40  
41  
42  
43  
44  
45  
46  
47  
48  
49  
50  
51  
52  
53  
54  
55  
56  
57  
58  
59  
60

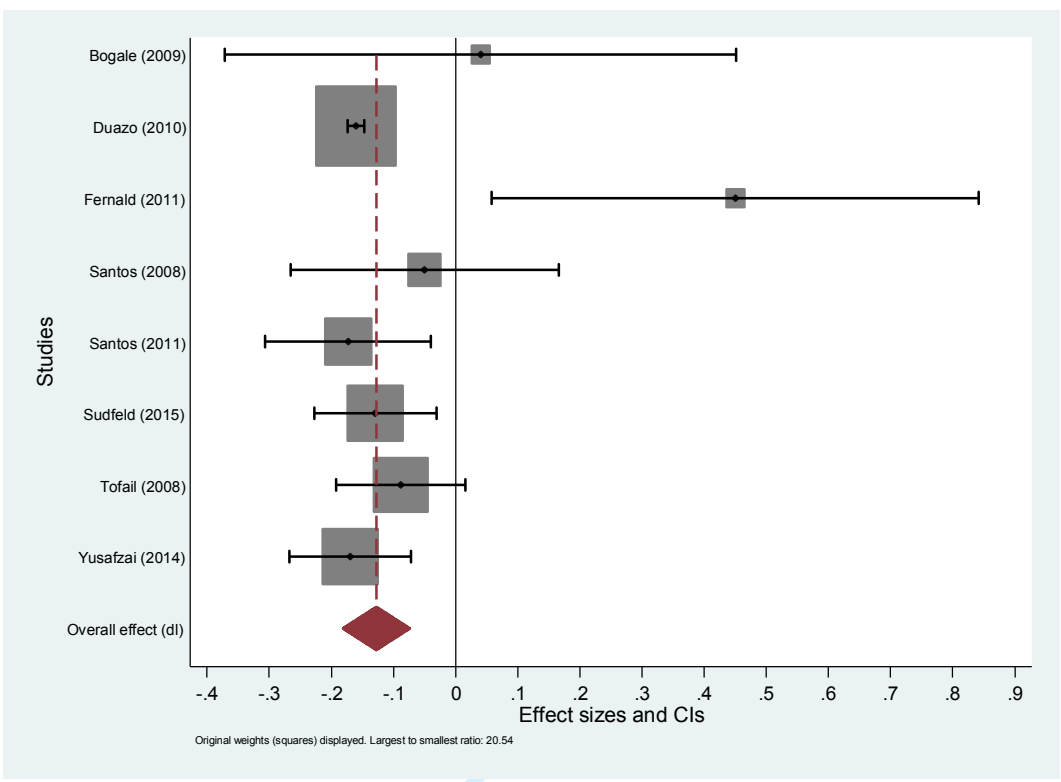

Figure 7: Association between lack of access to sanitation (reference: access to sanitation) and cognitive development.

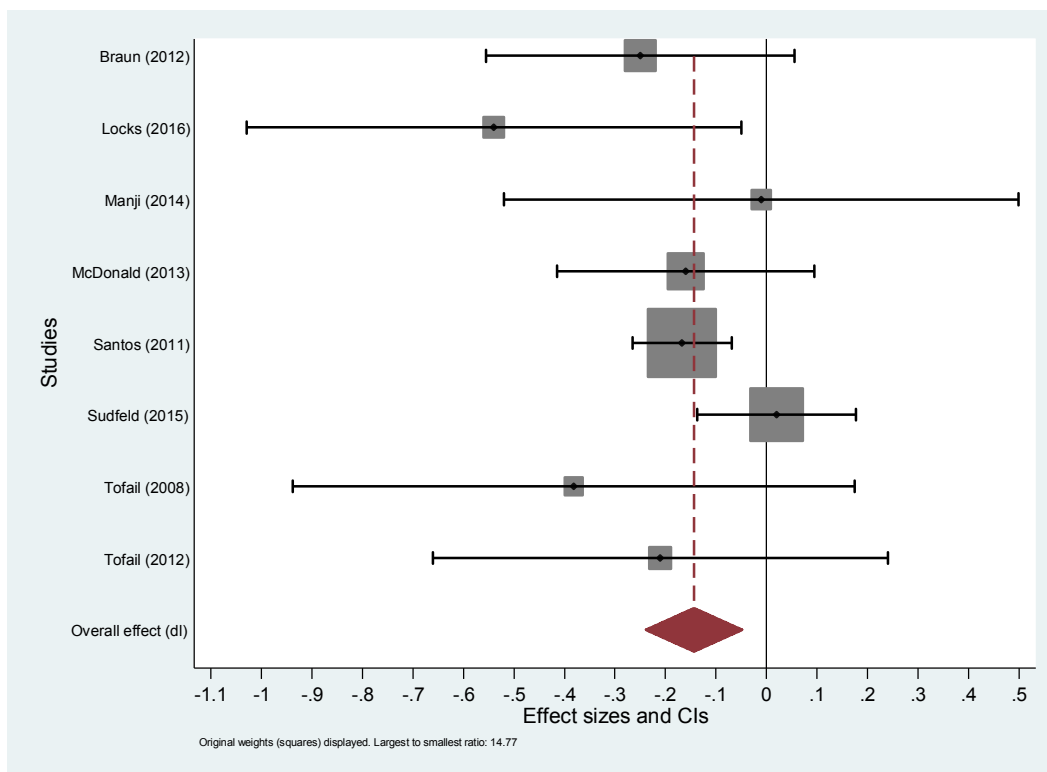

**Figure 8: Association between preterm-AGA (reference: term-AGA) and cognitive development.**

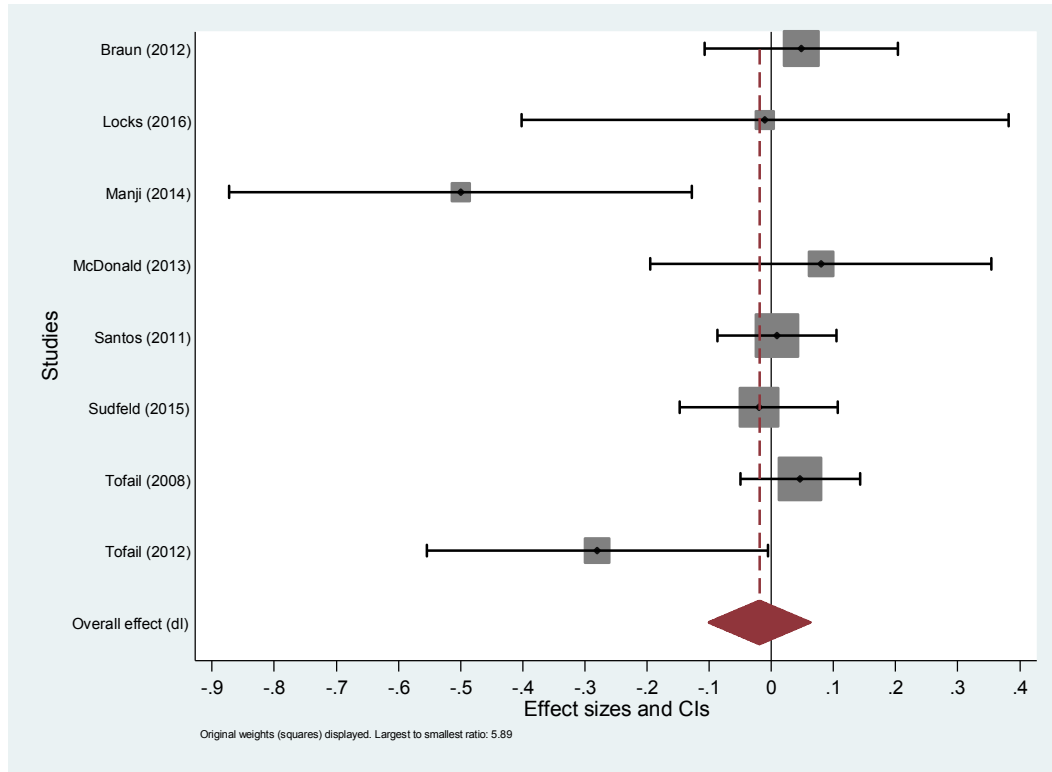

**Figure 9: Association between term-SGA (reference: term-AGA) and cognitive development.**

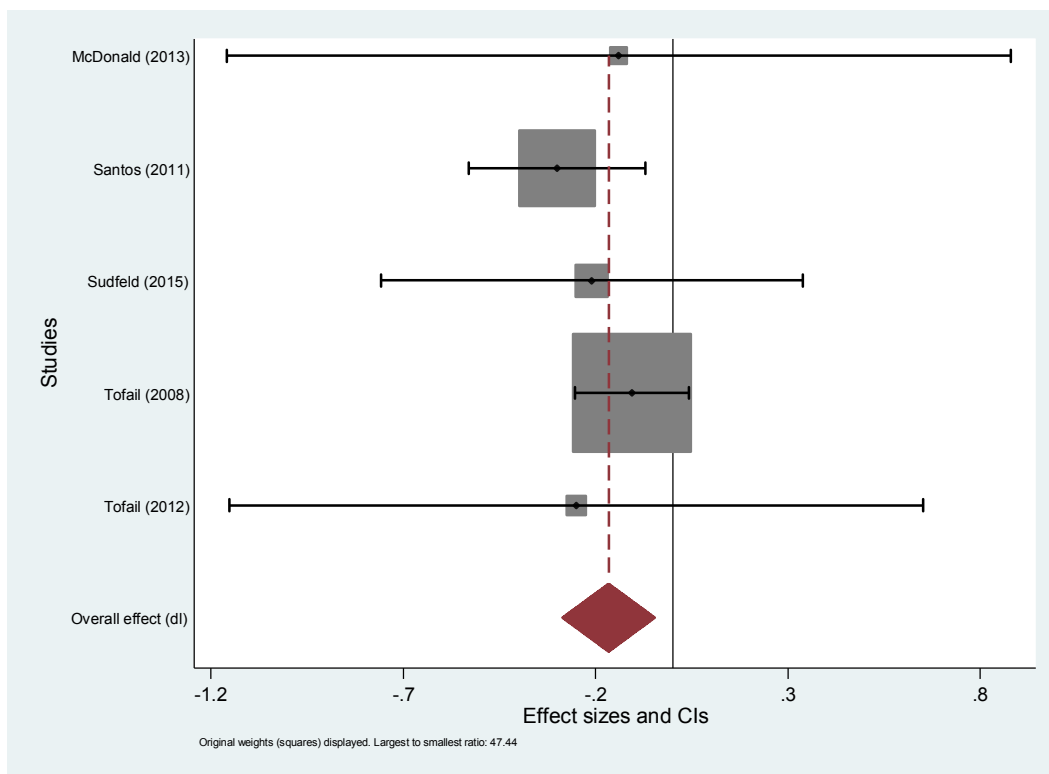

**Figure 10: Association between preterm- SGA (reference: term-AGA) and cognitive development.**

1  
2  
3  
4  
5  
6  
7  
8  
9  
10  
11  
12  
13  
14  
15  
16  
17  
18  
19  
20  
21  
22  
23  
24  
25  
26  
27  
28  
29  
30  
31  
32  
33  
34  
35  
36  
37  
38  
39  
40  
41  
42  
43  
44  
45  
46  
47  
48  
49  
50  
51  
52  
53  
54  
55  
56  
57  
58  
59  
60

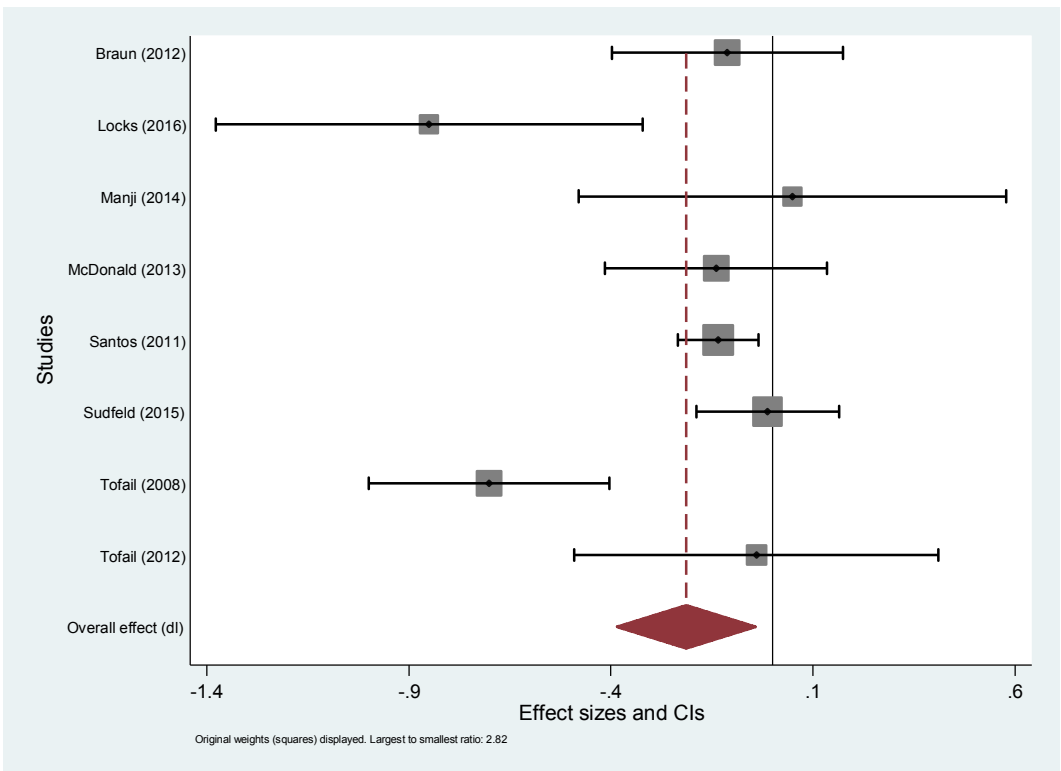

Figure 11: Association between late preterm birth, 34-37 weeks (reference: term) and cognitive development.

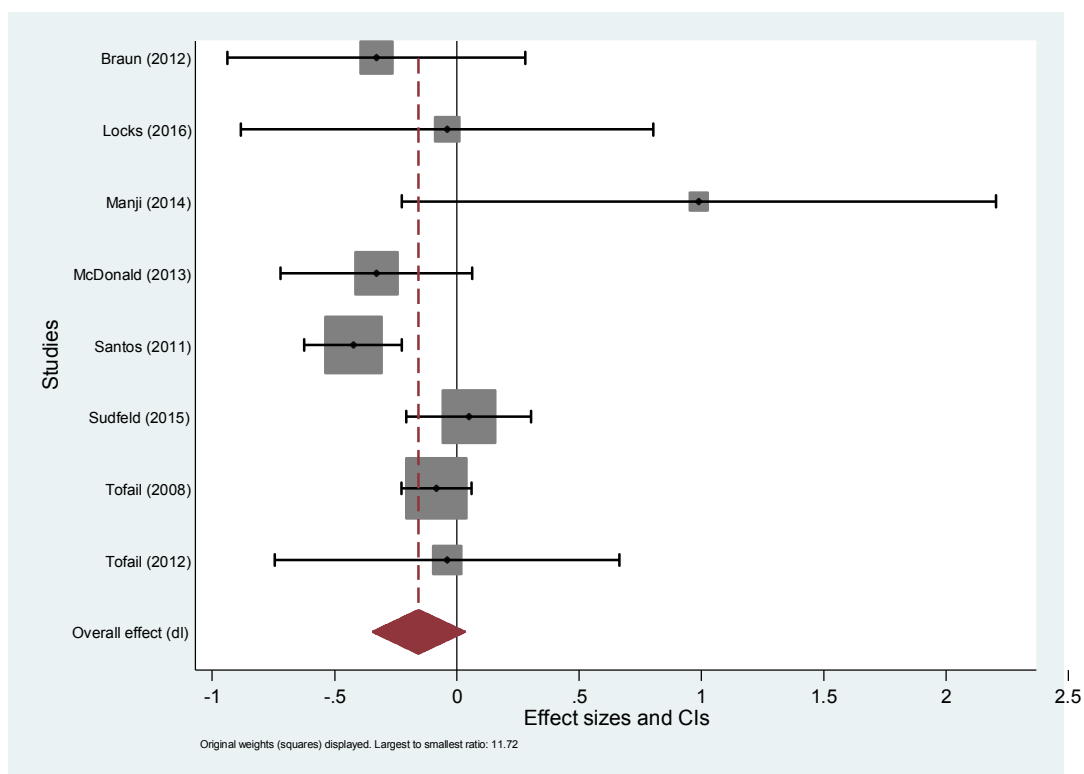

Figure 12: Association between early preterm birth, < 34 weeks (reference: term) and cognitive development.



1  
2  
3  
4  
5  
6  
7  
8  
9  
10  
11  
12  
13  
14  
15  
16  
17  
18  
19  
20  
21  
22  
23  
24  
25  
26  
27  
28  
29  
30  
31  
32  
33  
34  
35  
36  
37  
38  
39  
40  
41  
42  
43  
44  
45  
46  
47  
48  
49  
50  
51  
52  
53  
54  
55  
56  
57  
58  
59  
60

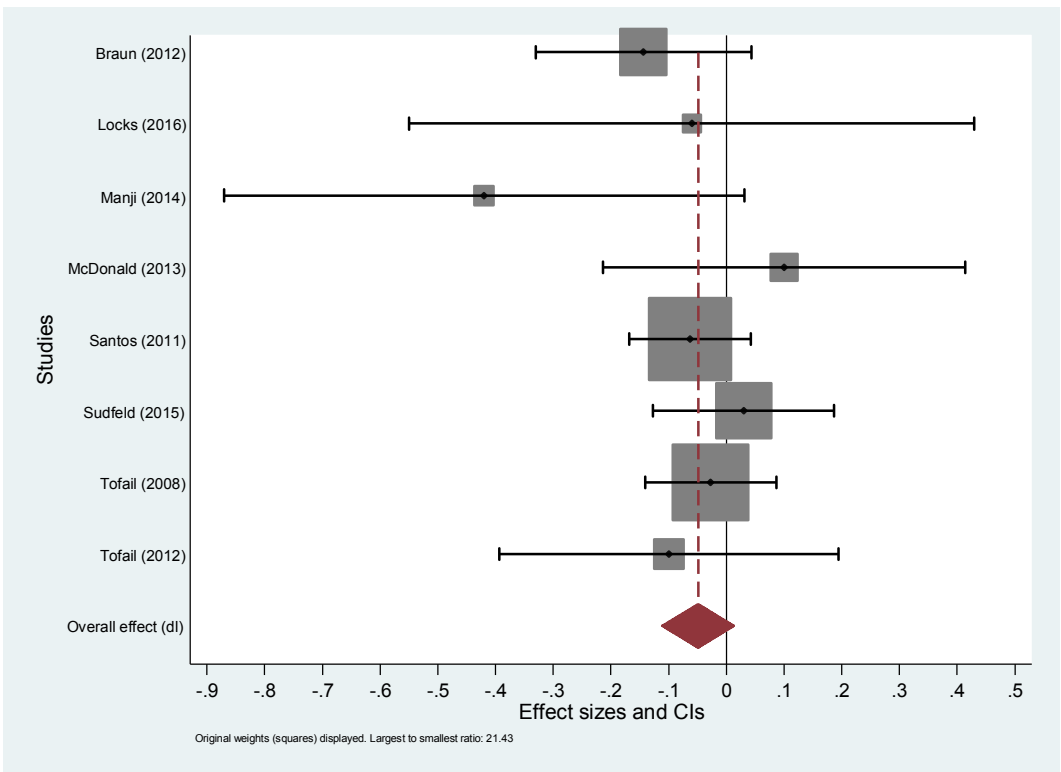

Figure 13: Association between moderate SGA (reference: AGA) and cognitive development.

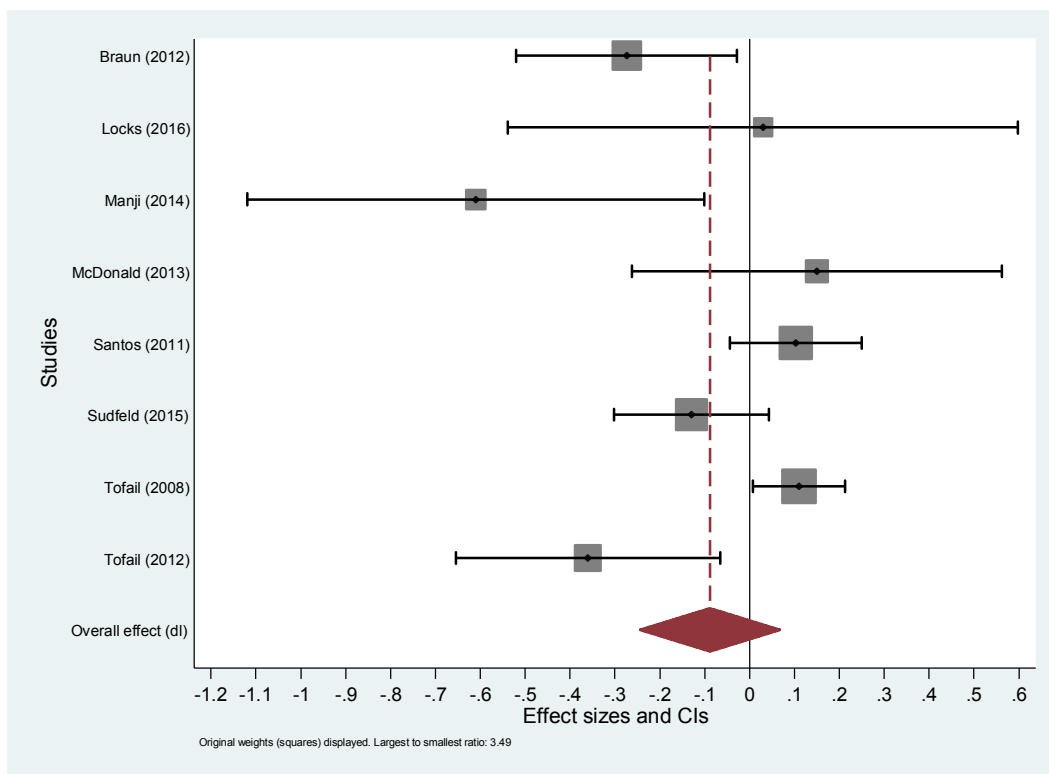

**Figure 14: Association between severe SGA (reference: AGA) and cognitive development.**

2. **Child Risk Factors on Child’s Motor Development**

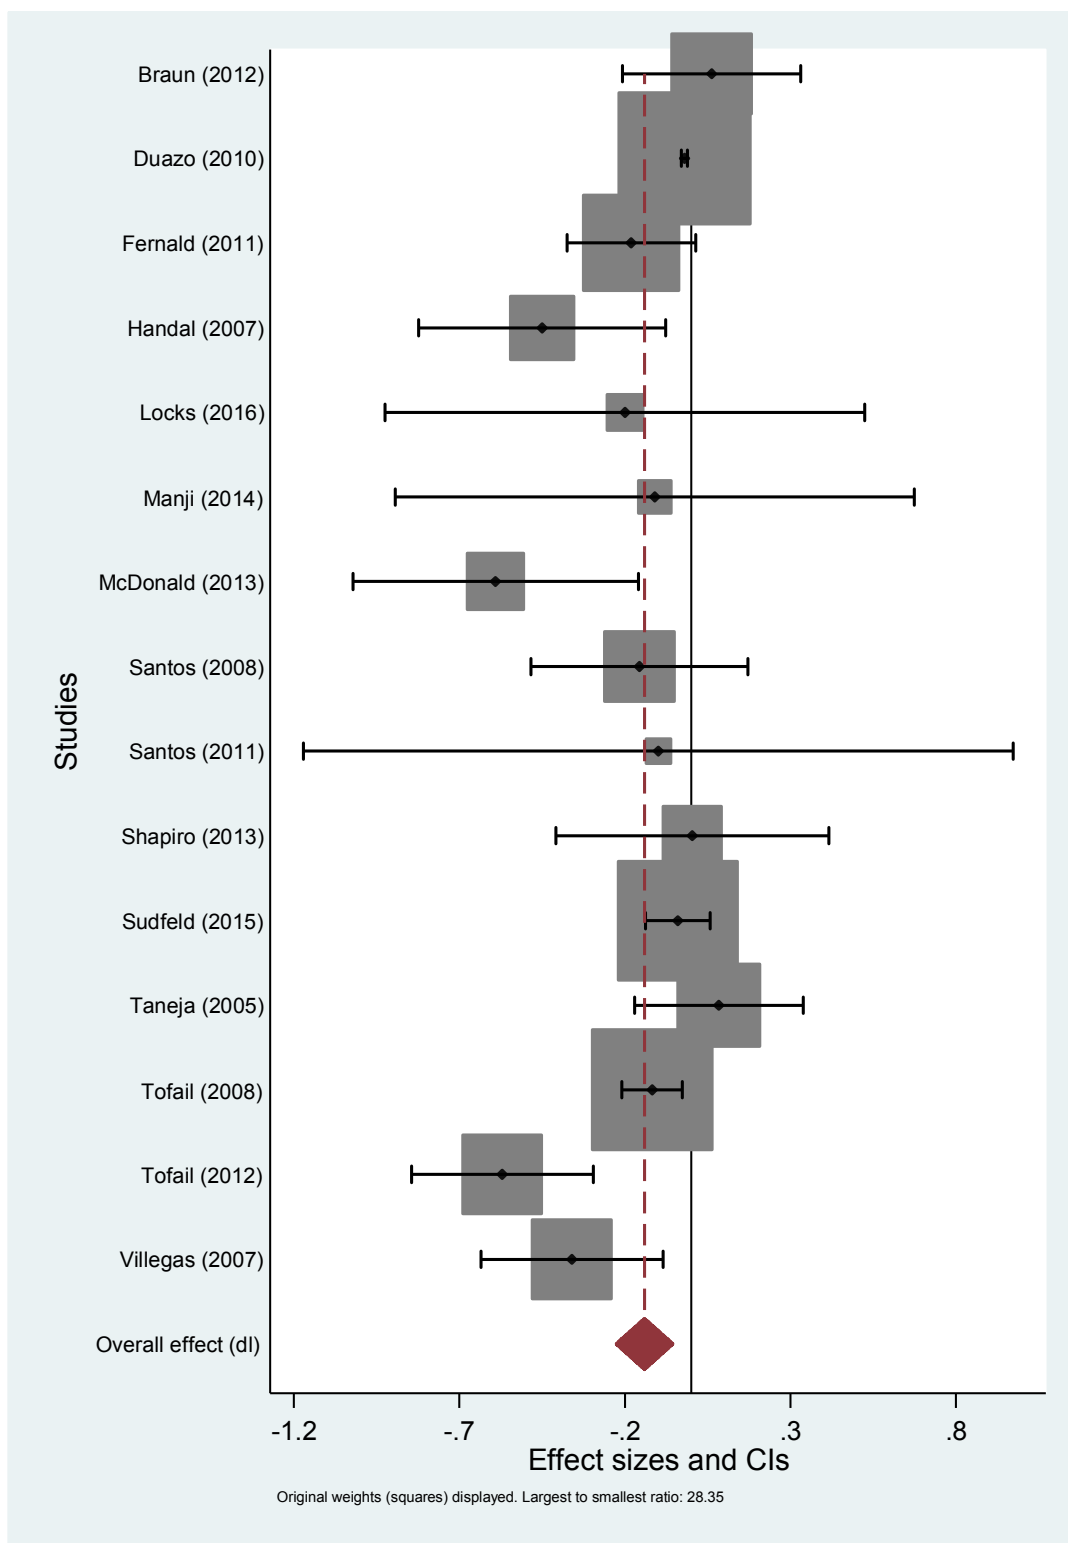

Figure 15: Association between low birth weight (reference: normal birth weight) and motor development.

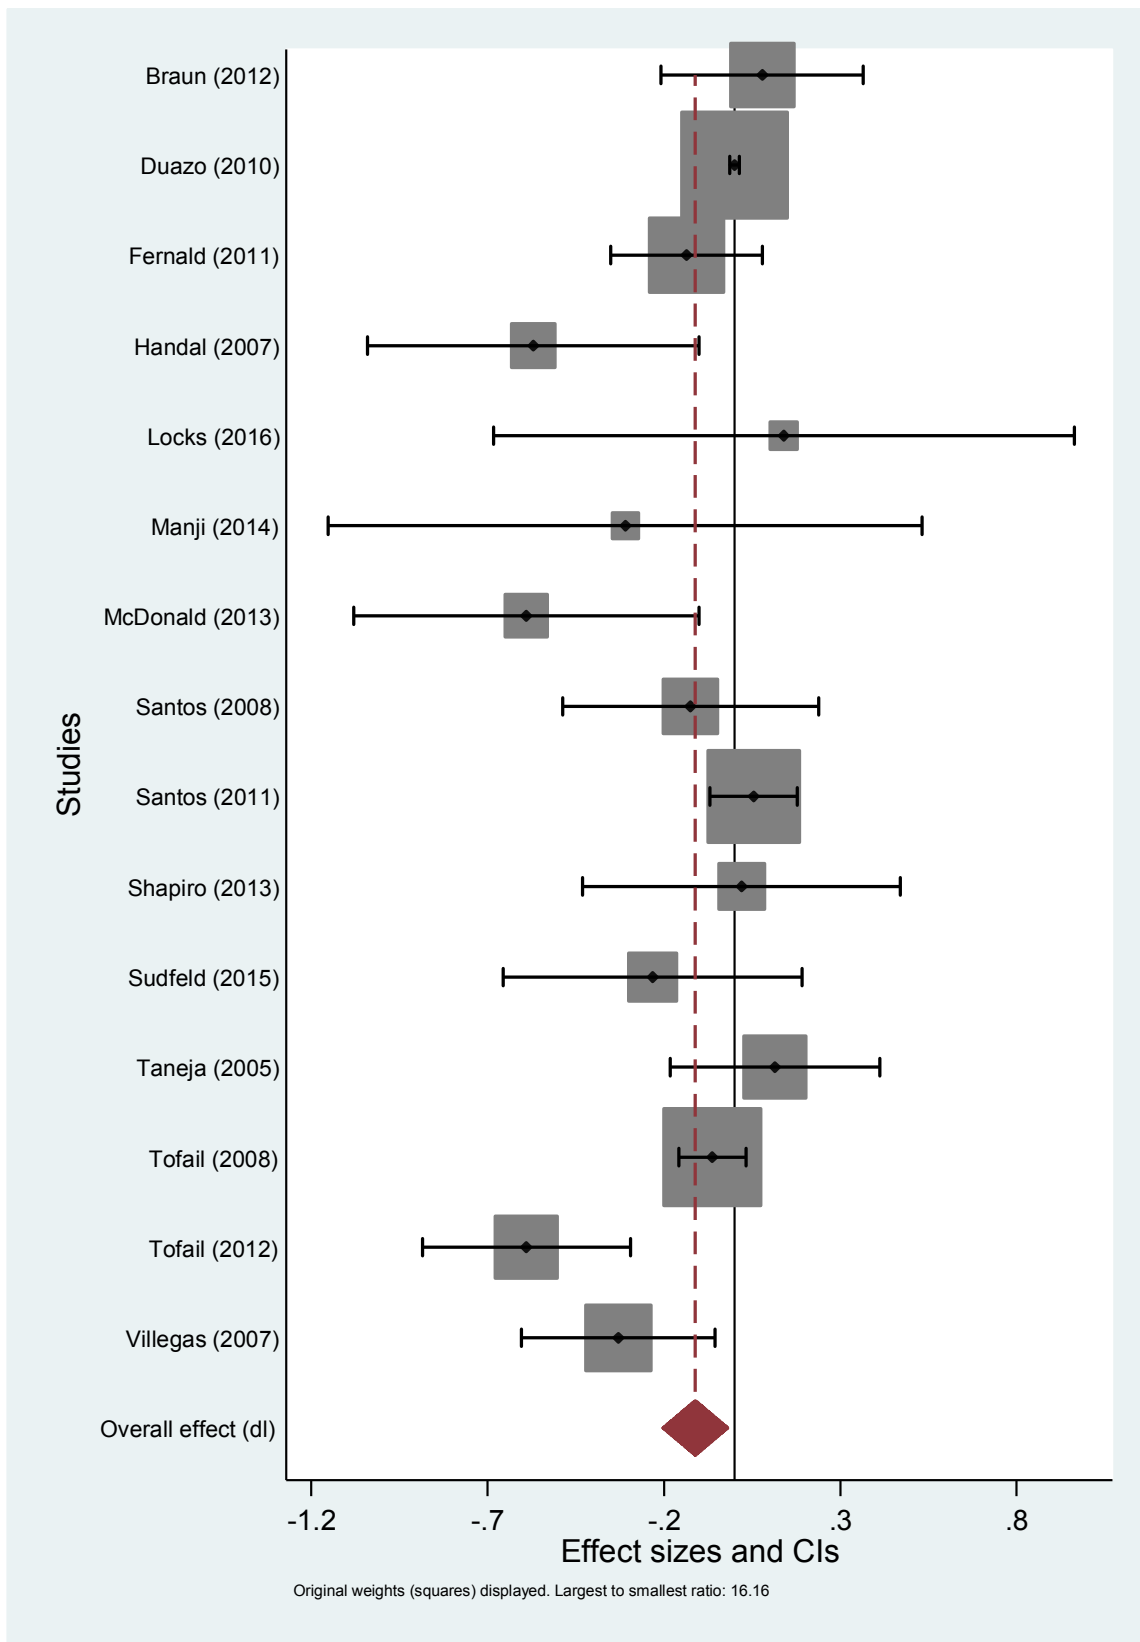

Figure 16: Association between moderately low birth weight (reference: normal birth weight) and motor development.

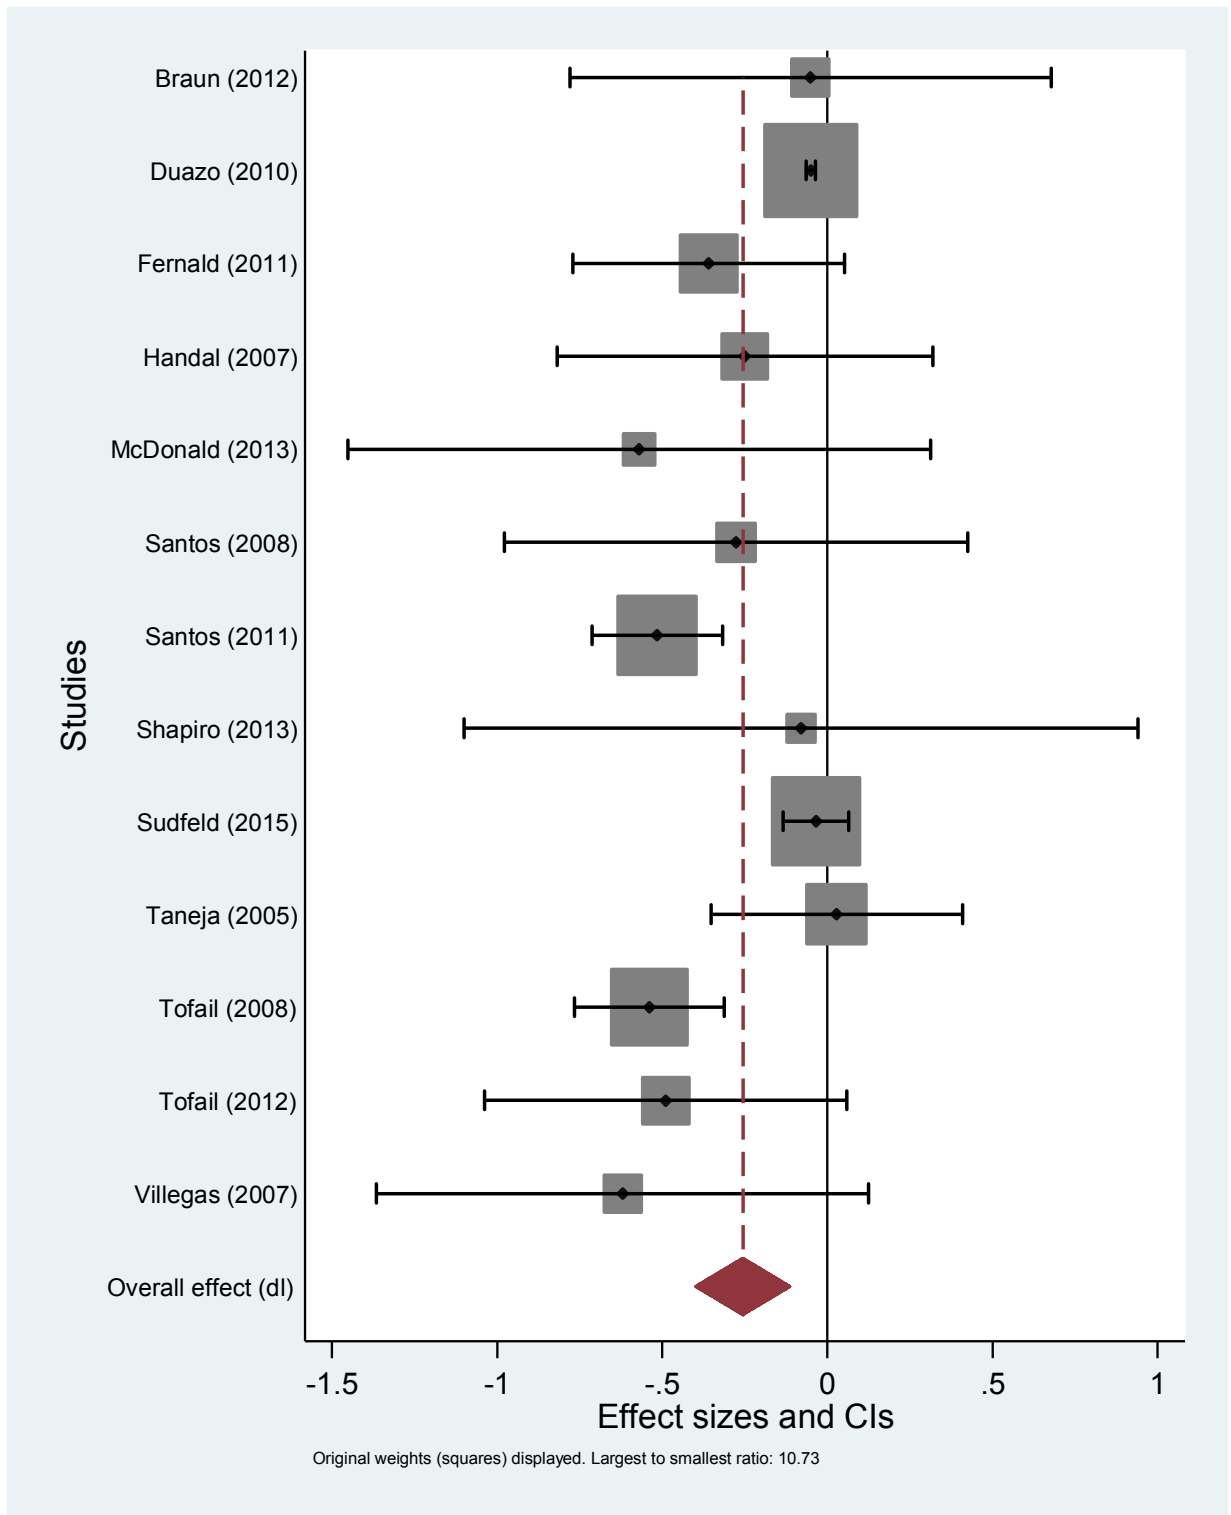

Figure 17: Association between very low birth weight (reference: normal birth weight) and motor development.

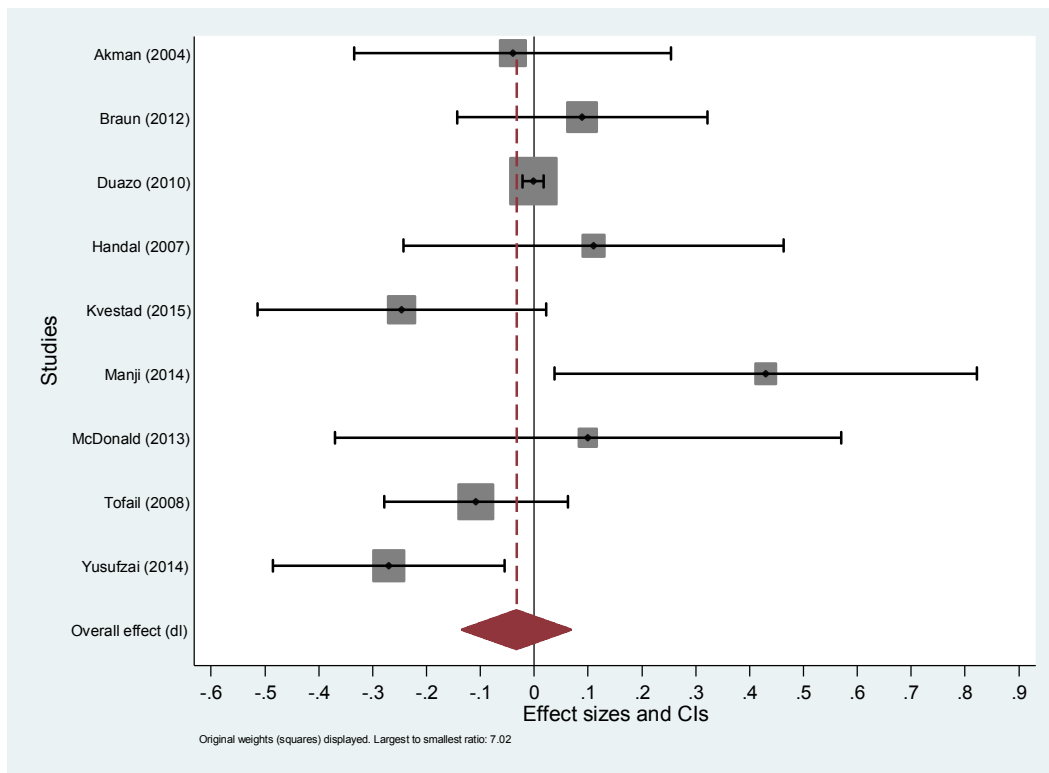

**Figure 18: Association between child mild anemia (reference: no anemia) and motor development.**

Review only

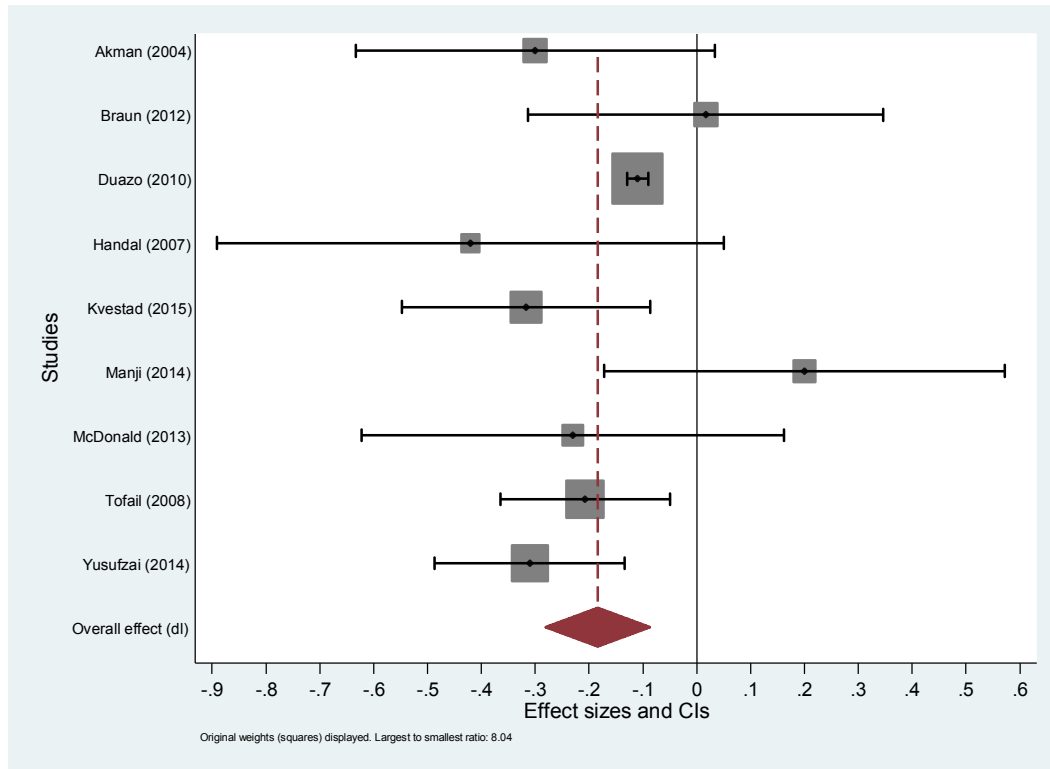

**Figure 19: Association between child moderate anemia (reference: no anemia) and motor development.**

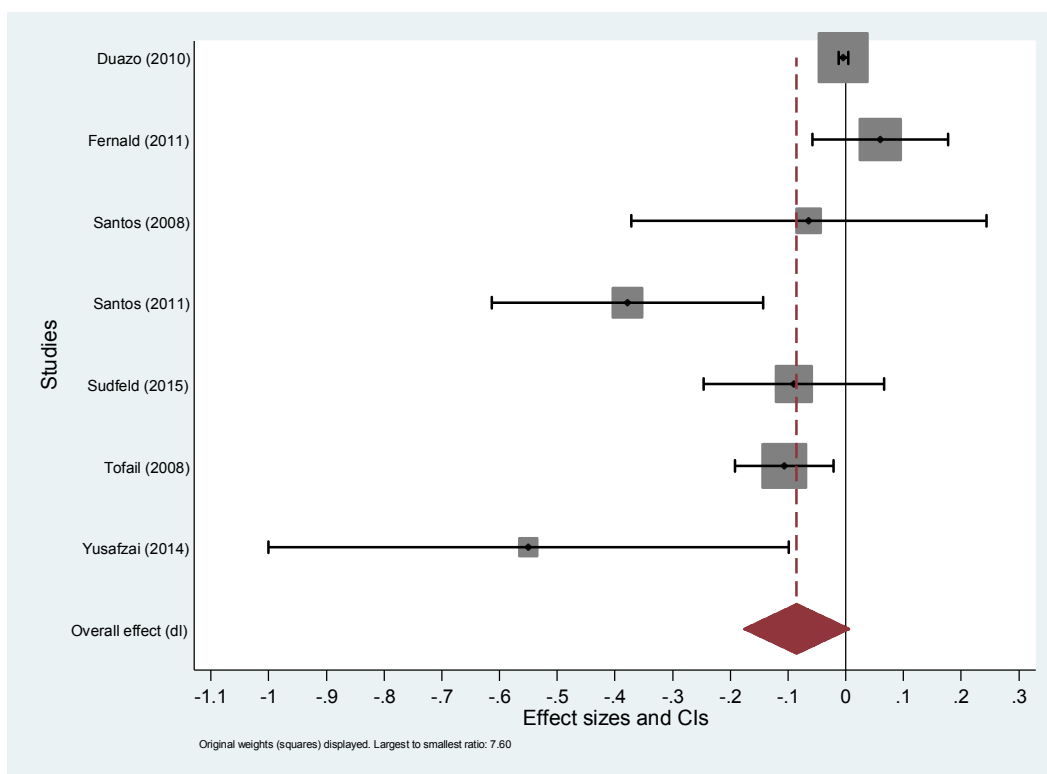

Figure 20: Association between lack of access to clean water (reference: access to clean water) and motor development.



1  
2  
3  
4  
5  
6  
7  
8  
9  
10  
11  
12  
13  
14  
15  
16  
17  
18  
19  
20  
21  
22  
23  
24  
25  
26  
27  
28  
29  
30  
31  
32  
33  
34  
35  
36  
37  
38  
39  
40  
41  
42  
43  
44  
45  
46  
47  
48  
49  
50  
51  
52  
53  
54  
55  
56  
57  
58  
59  
60

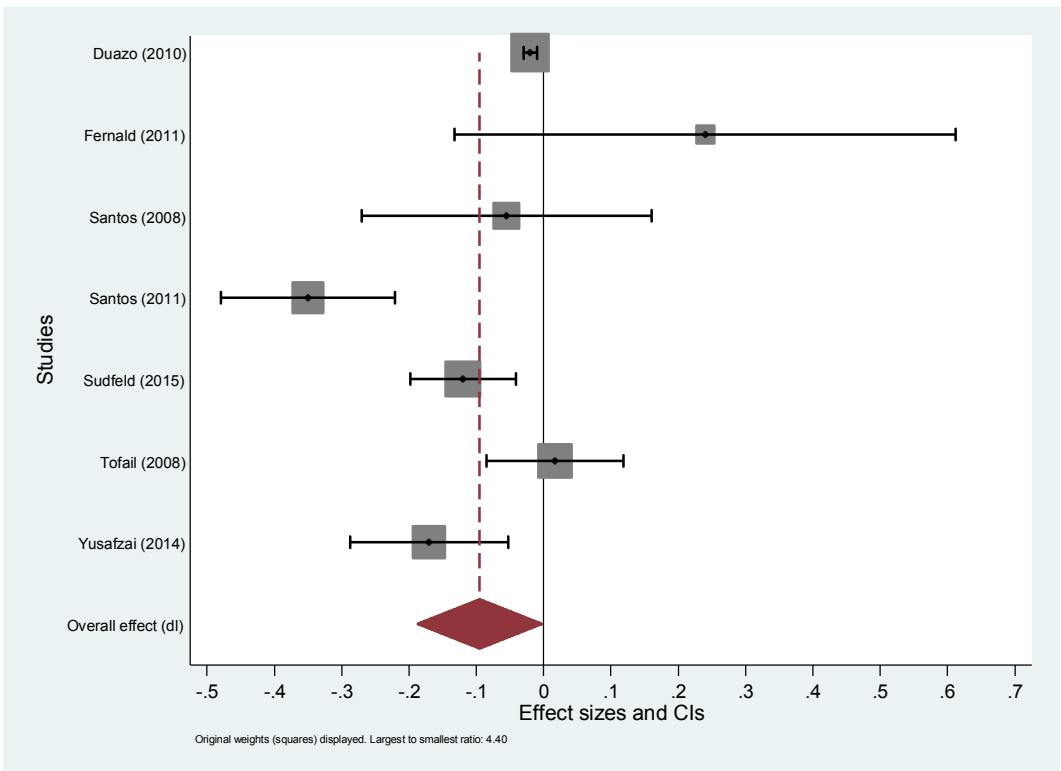

Figure 21: Association between lack of access to sanitation (reference: access to sanitation) and motor development.

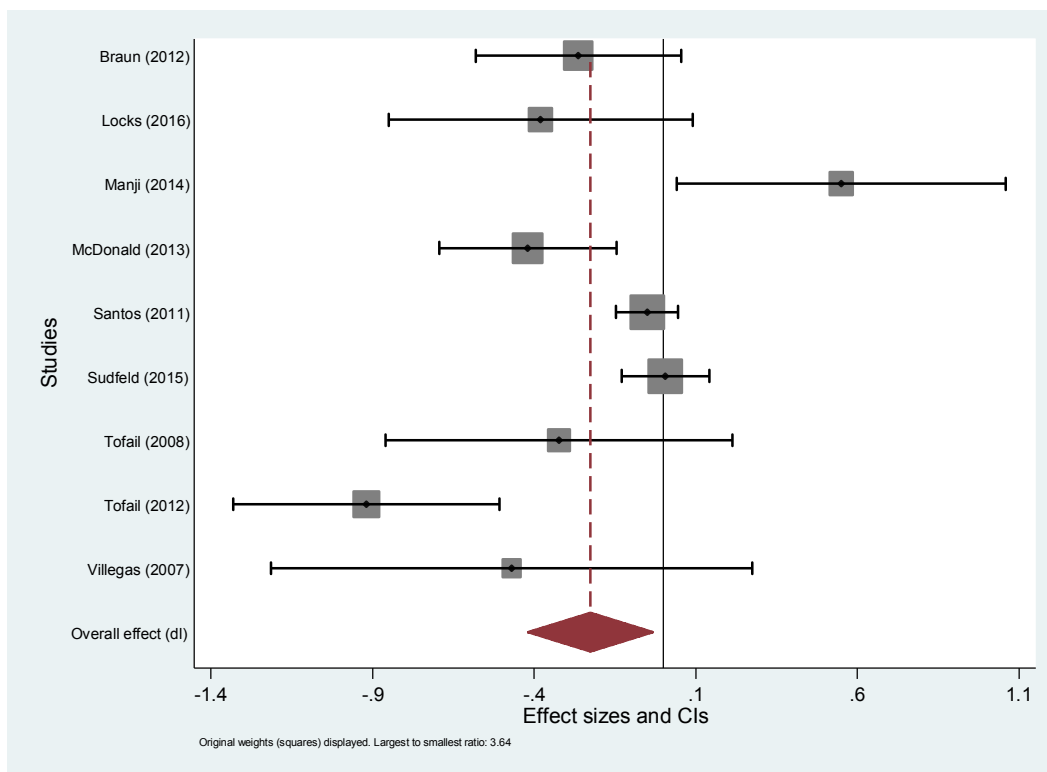

**Figure 22: Association between preterm-AGA (reference: term-AGA) and motor development.**

1  
2  
3  
4  
5  
6  
7  
8  
9  
10  
11  
12  
13  
14  
15  
16  
17  
18  
19  
20  
21  
22  
23  
24  
25  
26  
27  
28  
29  
30  
31  
32  
33  
34  
35  
36  
37  
38  
39  
40  
41  
42  
43  
44  
45  
46  
47  
48  
49  
50  
51  
52  
53  
54  
55  
56  
57  
58  
59  
60

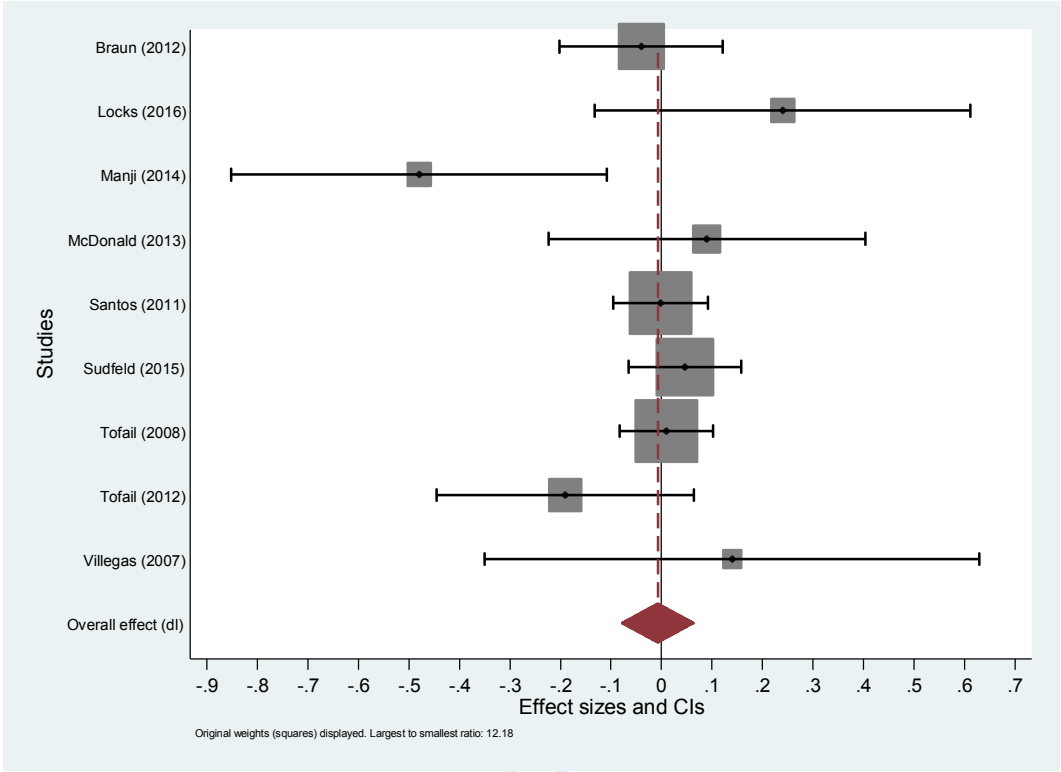

**Figure 23: Association between term-SGA (reference: term-AGA) and motor development.**

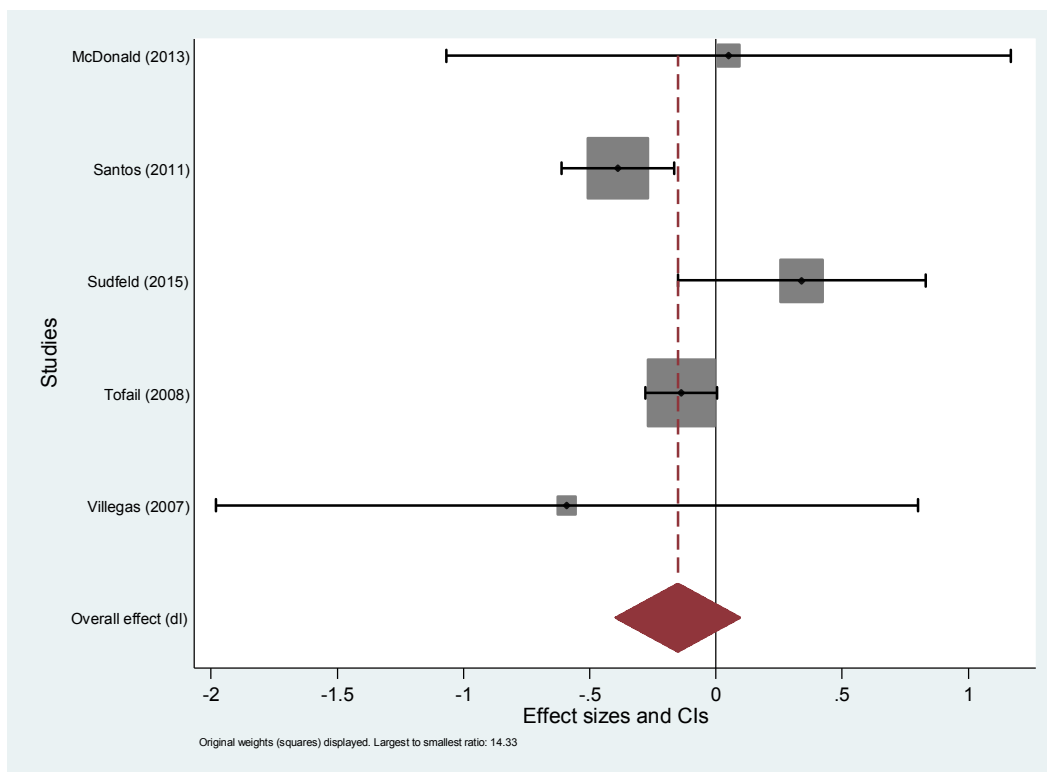

**Figure 24: Association between preterm-SGA (reference: term-AGA) and motor development.**

Review only

1  
2  
3  
4  
5  
6  
7  
8  
9  
10  
11  
12  
13  
14  
15  
16  
17  
18  
19  
20  
21  
22  
23  
24  
25  
26  
27  
28  
29  
30  
31  
32  
33  
34  
35  
36  
37  
38  
39  
40  
41  
42  
43  
44  
45  
46  
47  
48  
49  
50  
51  
52  
53  
54  
55  
56  
57  
58  
59  
60

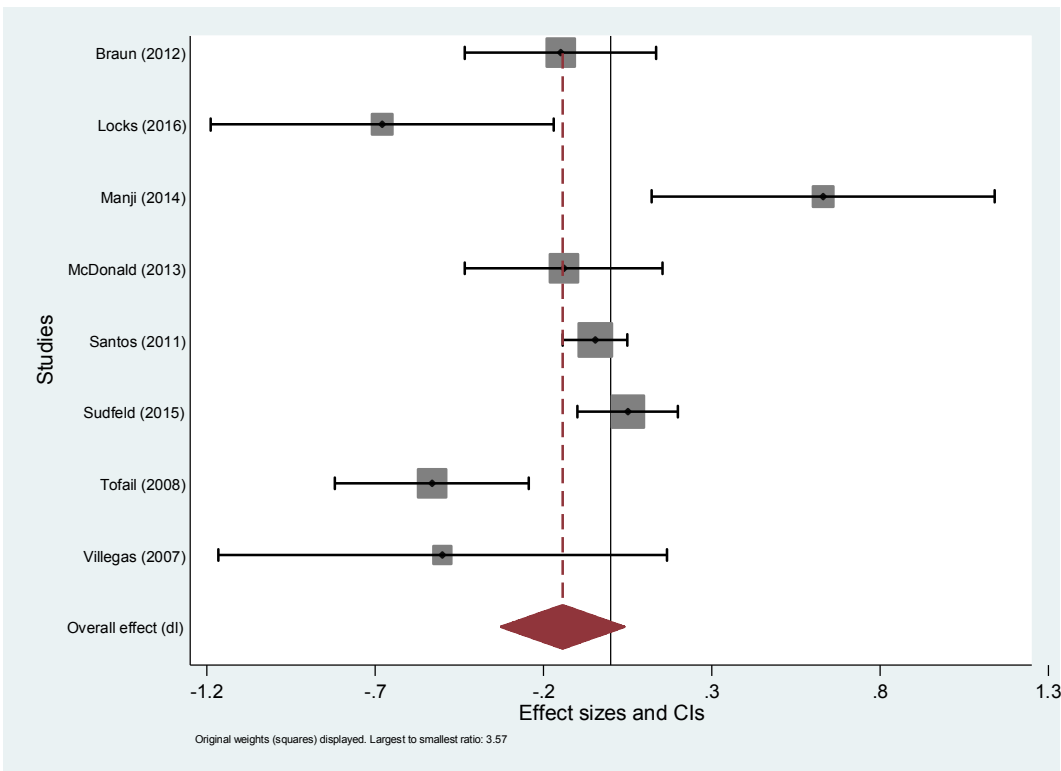

Figure 25: Association between late preterm birth, 34-37 weeks (reference: term) and motor development.

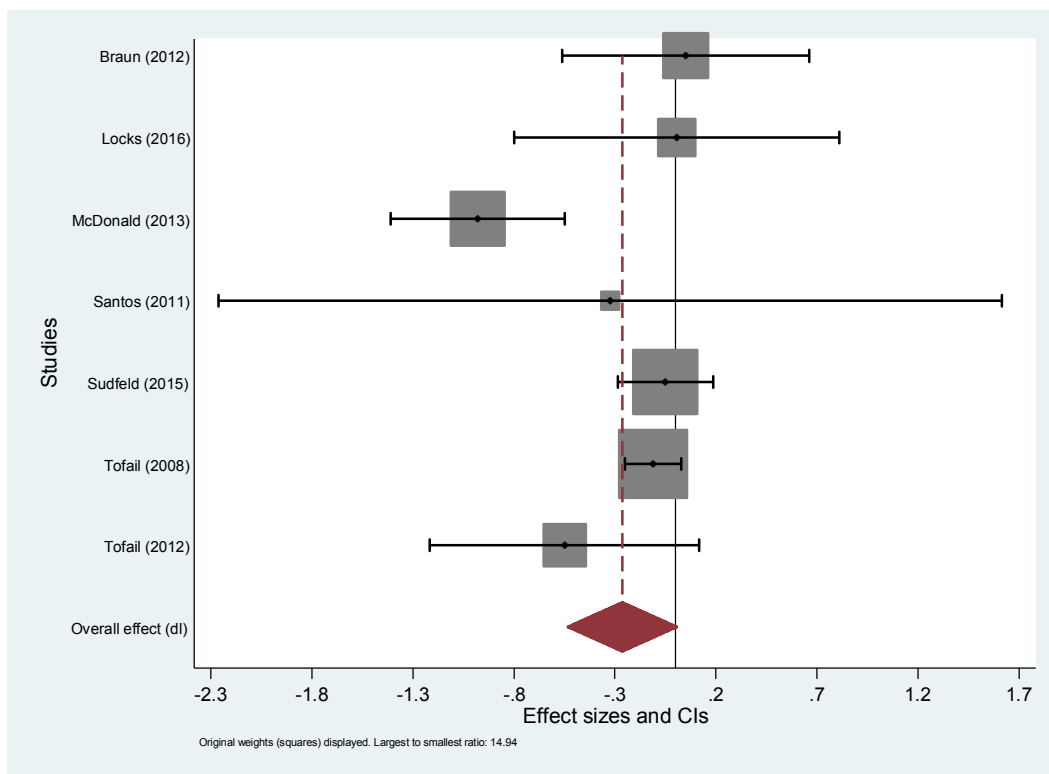

Figure 26: Association between early preterm birth, < 34 weeks (reference: term) and motor development.

1  
2  
3  
4  
5  
6  
7  
8  
9  
10  
11  
12  
13  
14  
15  
16  
17  
18  
19  
20  
21  
22  
23  
24  
25  
26  
27  
28  
29  
30  
31  
32  
33  
34  
35  
36  
37  
38  
39  
40  
41  
42  
43  
44  
45  
46  
47  
48  
49  
50  
51  
52  
53  
54  
55  
56  
57  
58  
59  
60

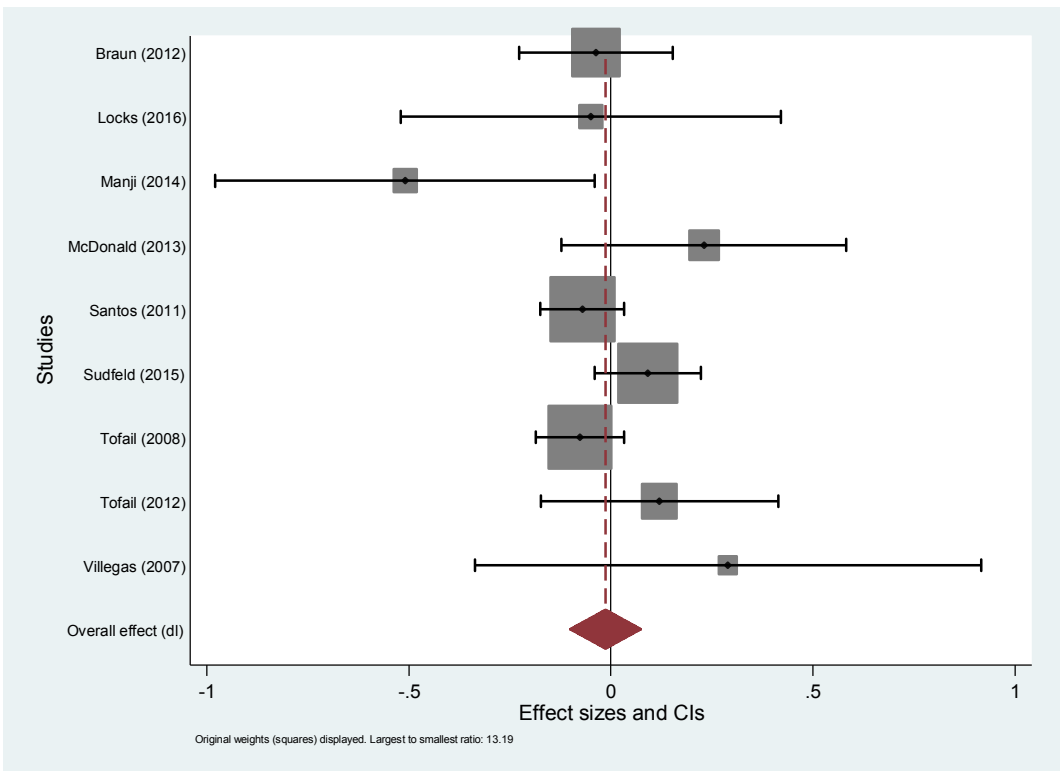

Figure 27: Association between moderate SGA (reference: AGA) and motor development.

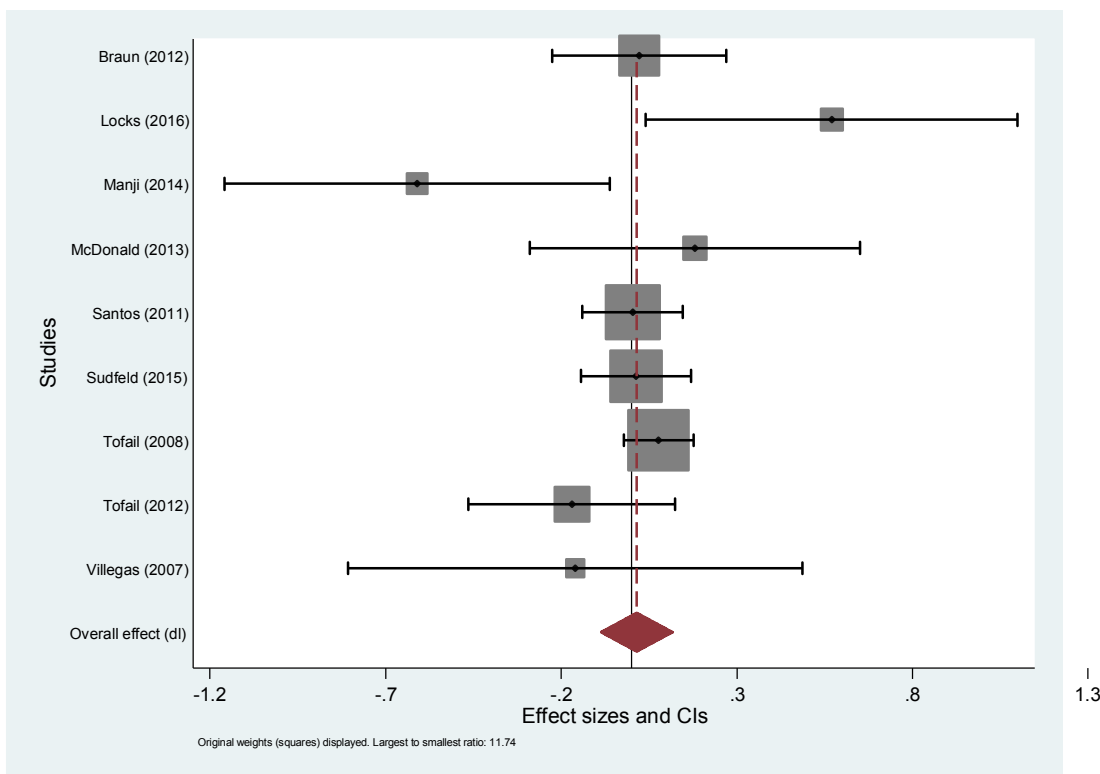

**Figure 28: Association between severe SGA (reference: AGA) and motor development.**



### 3. Child Risk Factors on Child's Language Development

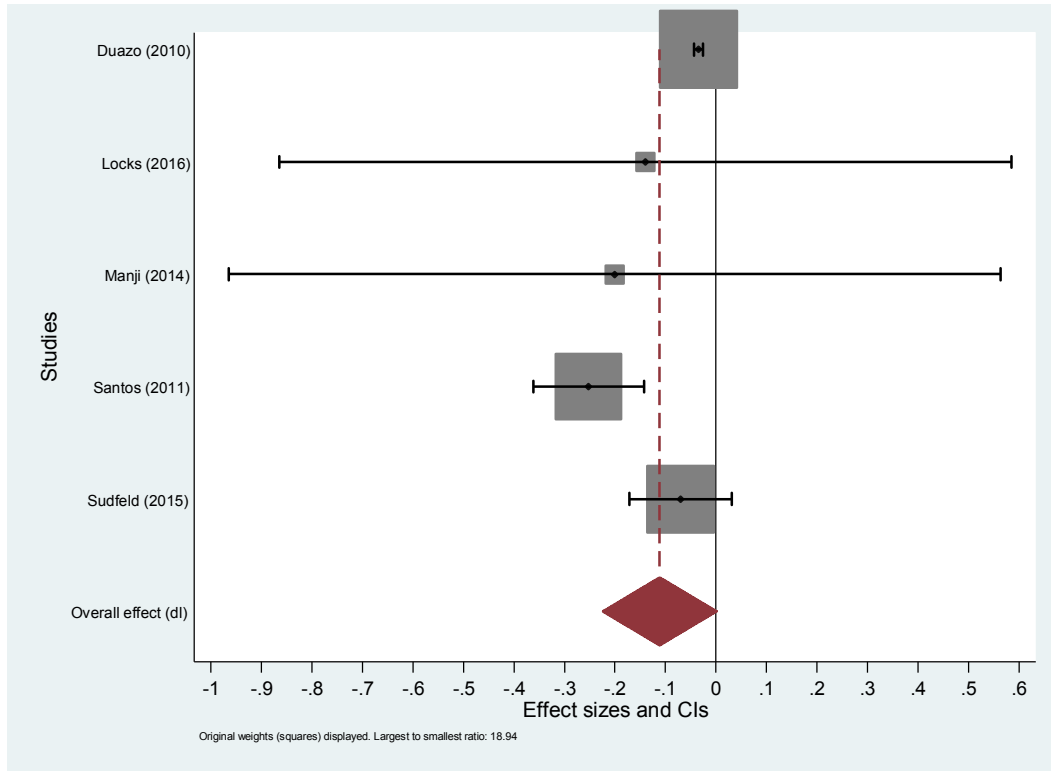

Figure 29: Association between low birth weight (LBW) and (reference: normal birth weight) and language development.

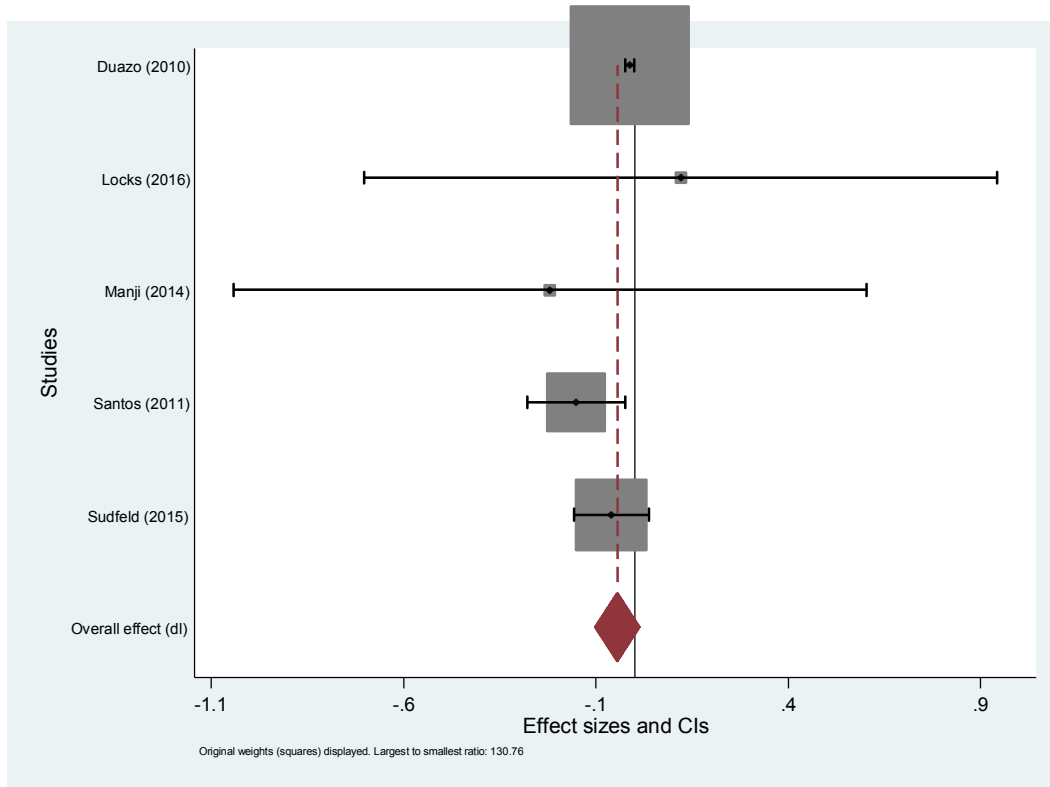

**Figure 30: Association between moderately low birth weight and (reference: normal birth weight) and language development.**

1  
2  
3  
4  
5  
6  
7  
8  
9  
10  
11  
12  
13  
14  
15  
16  
17  
18  
19  
20  
21  
22  
23  
24  
25  
26  
27  
28  
29  
30  
31  
32  
33  
34  
35  
36  
37  
38  
39  
40  
41  
42  
43  
44  
45  
46  
47  
48  
49  
50  
51  
52  
53  
54  
55  
56  
57  
58  
59  
60

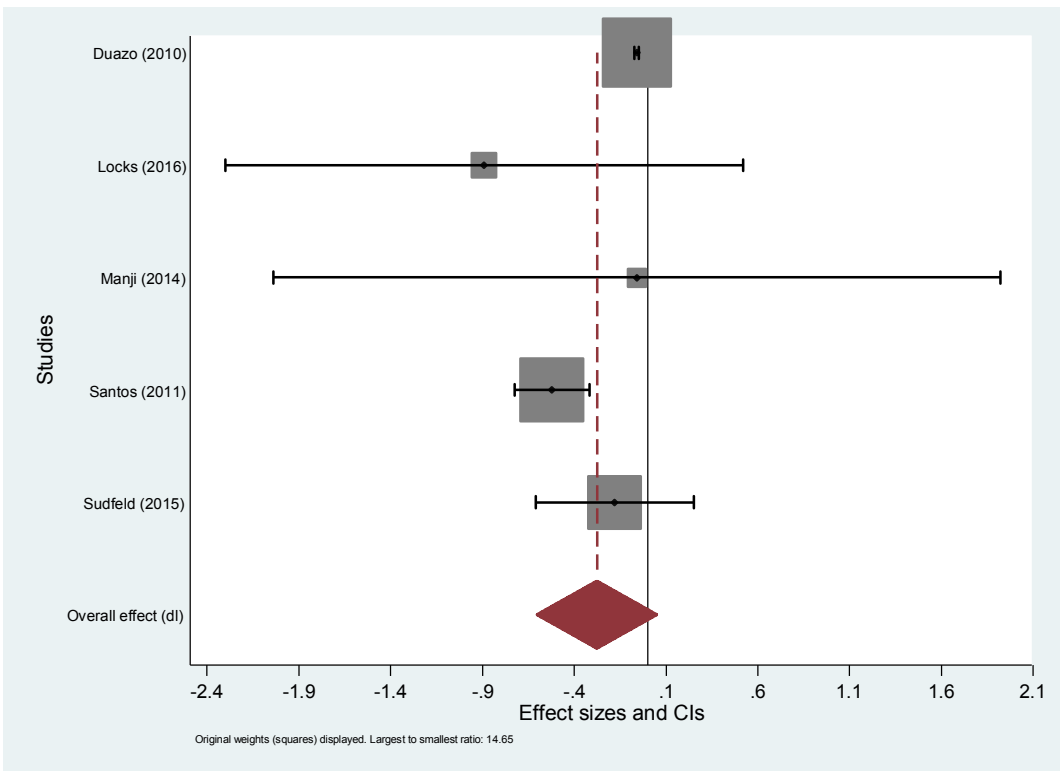

Figure 31: Association between very low birth weight and (reference: normal birth weight) and language development.

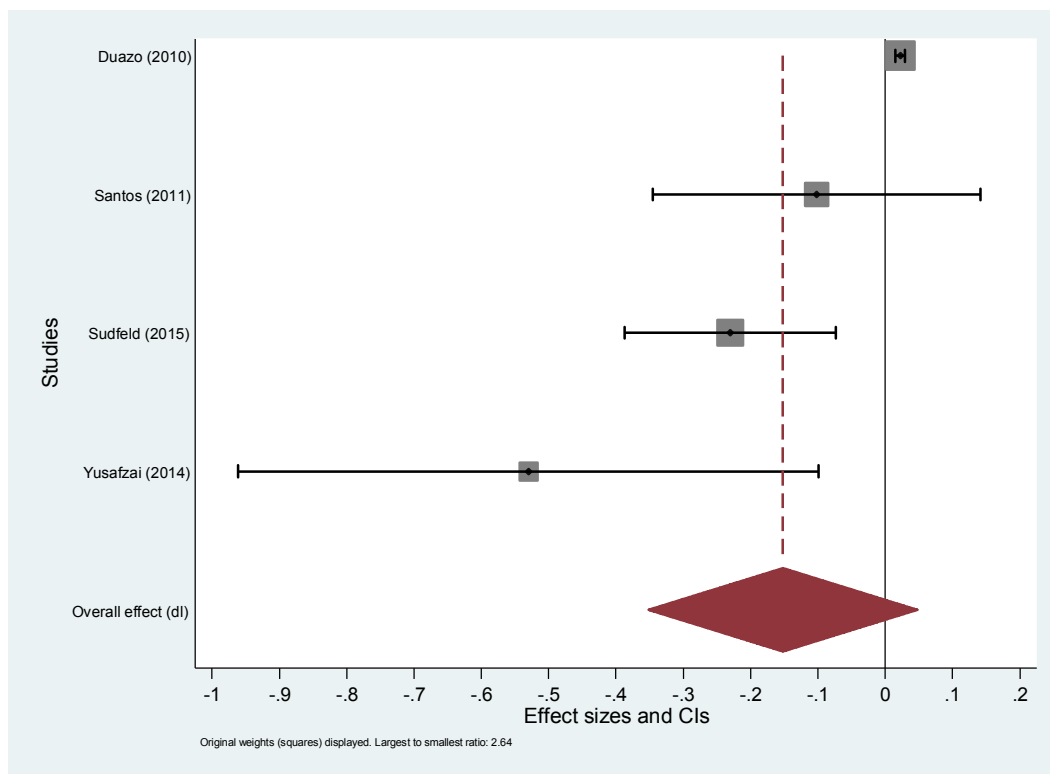

Figure 32: Association between lack of access to clean water (reference: access to clean water) and language development.

1  
2  
3  
4  
5  
6  
7  
8  
9  
10  
11  
12  
13  
14  
15  
16  
17  
18  
19  
20  
21  
22  
23  
24  
25  
26  
27  
28  
29  
30  
31  
32  
33  
34  
35  
36  
37  
38  
39  
40  
41  
42  
43  
44  
45  
46  
47  
48  
49  
50  
51  
52  
53  
54  
55  
56  
57  
58  
59  
60

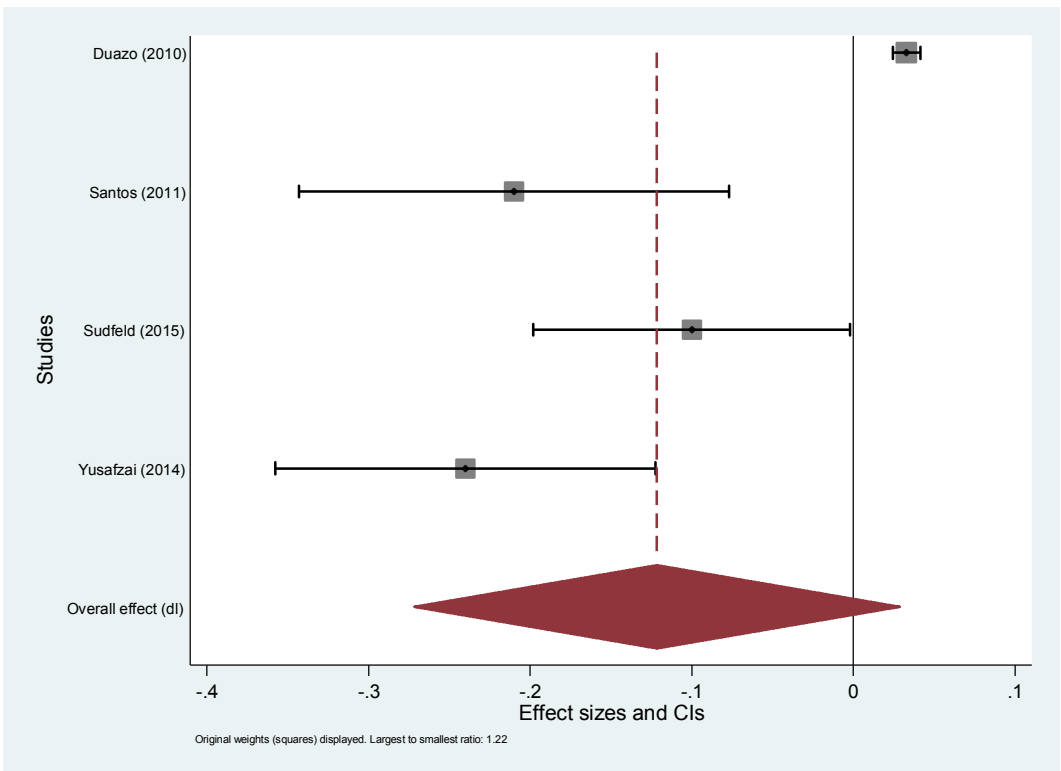

Figure 33: Association between lack of access to sanitation (reference: access to sanitation) and language development.

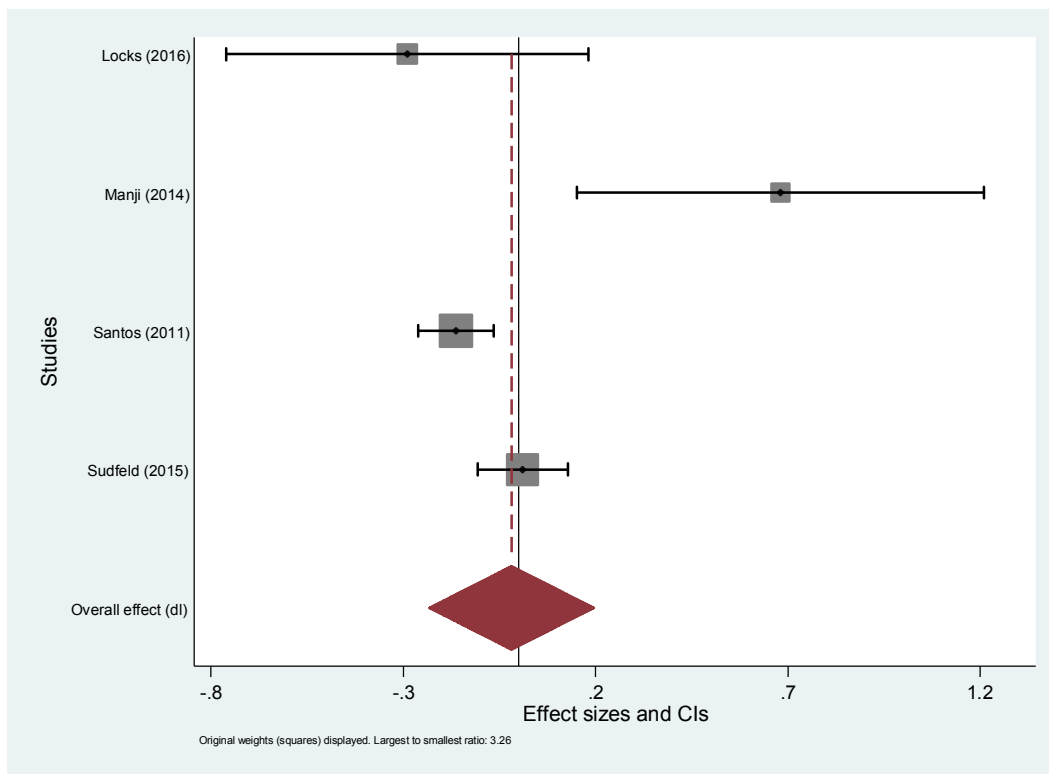

**Figure 34: Association between preterm-AGA (reference: term-AGA) and language development.**

1  
2  
3  
4  
5  
6  
7  
8  
9  
10  
11  
12  
13  
14  
15  
16  
17  
18  
19  
20  
21  
22  
23  
24  
25  
26  
27  
28  
29  
30  
31  
32  
33  
34  
35  
36  
37  
38  
39  
40  
41  
42  
43  
44  
45  
46  
47  
48  
49  
50  
51  
52  
53  
54  
55  
56  
57  
58  
59  
60

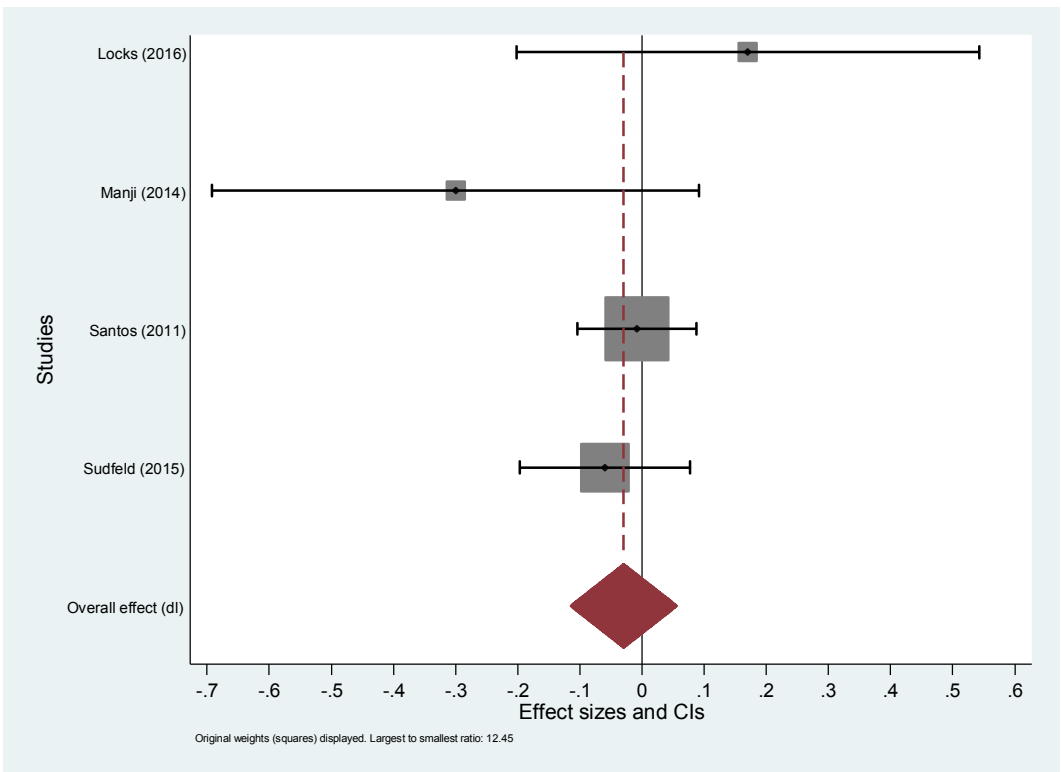

Figure 35: Association between term-SGA (reference: term-AGA) and language development.

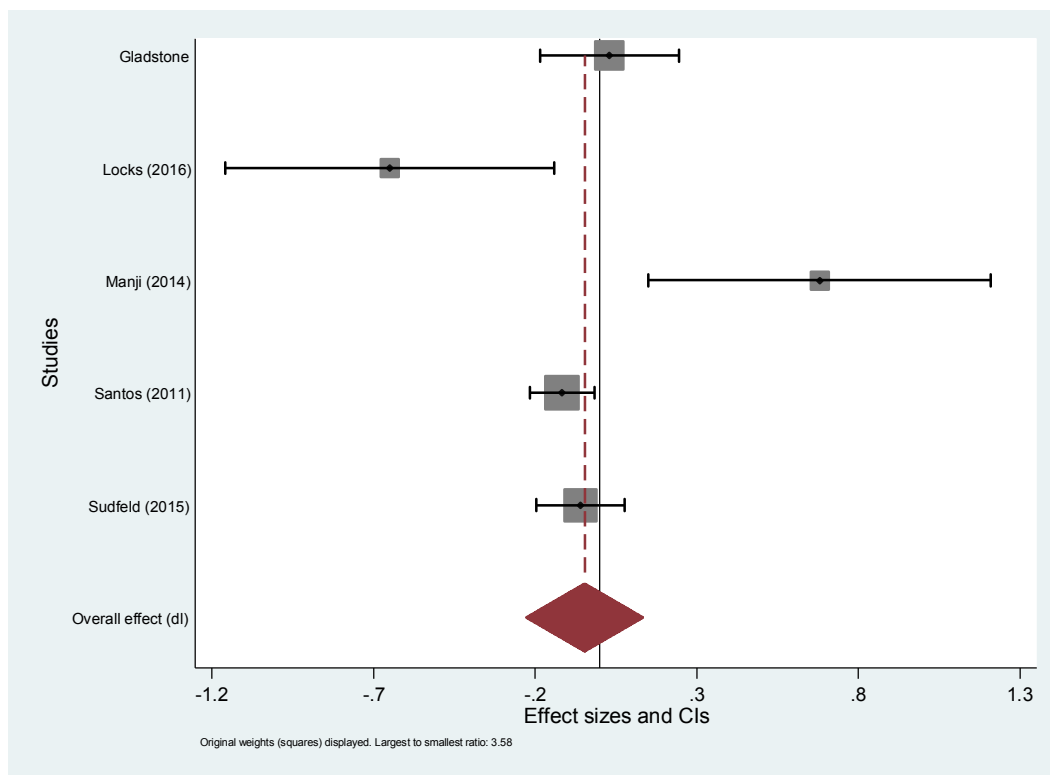

**Figure 36: Association between late preterm birth, 34-37 weeks (reference: term) and language development.**



1  
2  
3  
4  
5  
6  
7  
8  
9  
10  
11  
12  
13  
14  
15  
16  
17  
18  
19  
20  
21  
22  
23  
24  
25  
26  
27  
28  
29  
30  
31  
32  
33  
34  
35  
36  
37  
38  
39  
40  
41  
42  
43  
44  
45  
46  
47  
48  
49  
50  
51  
52  
53  
54  
55  
56  
57  
58  
59  
60

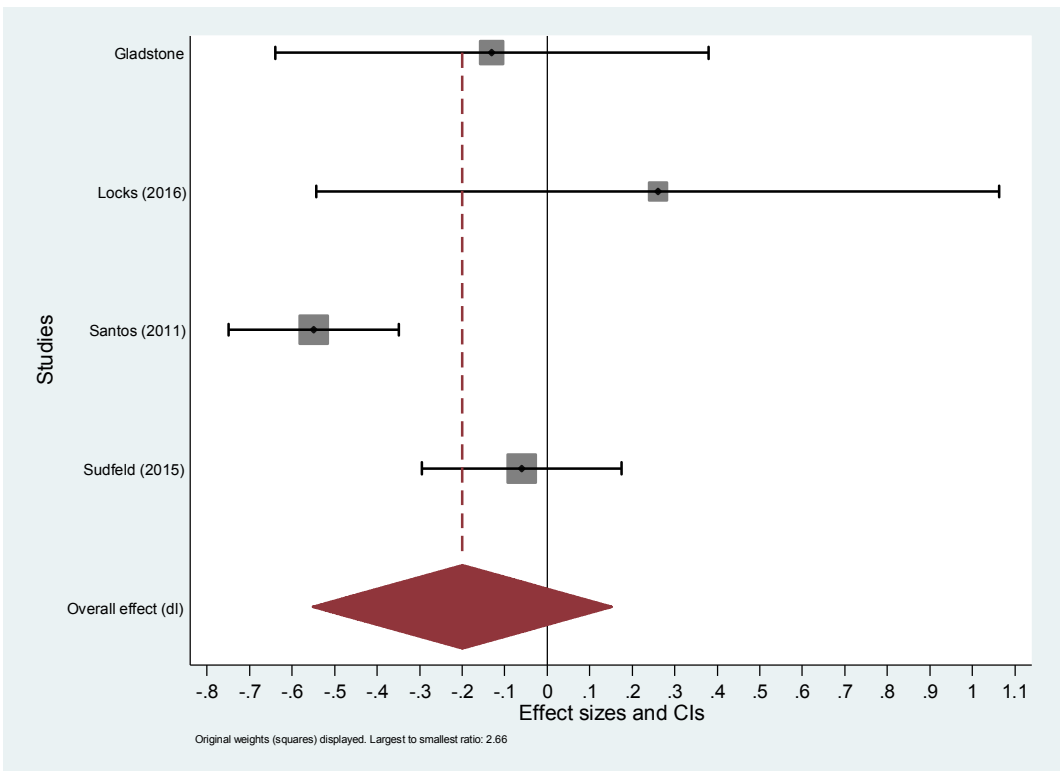

**Figure 37: Association between early preterm birth, < 34 weeks (reference: term) and language development.**

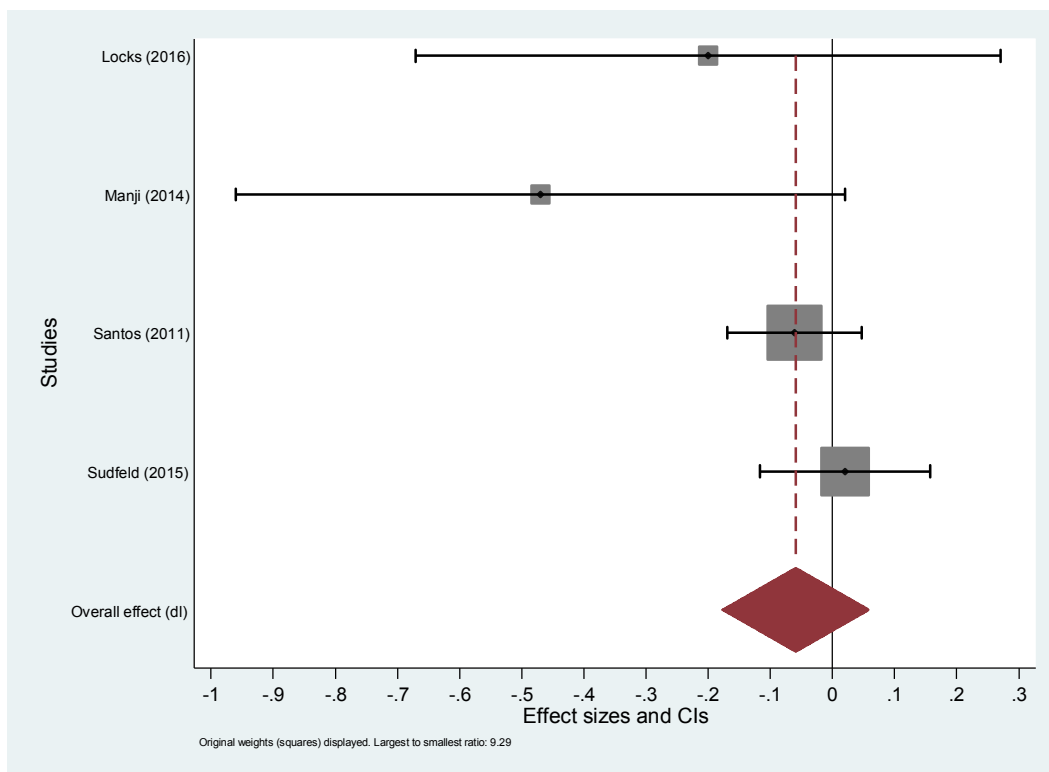

**Figure 38: Association between moderate SGA (reference: AGA) and language development.**

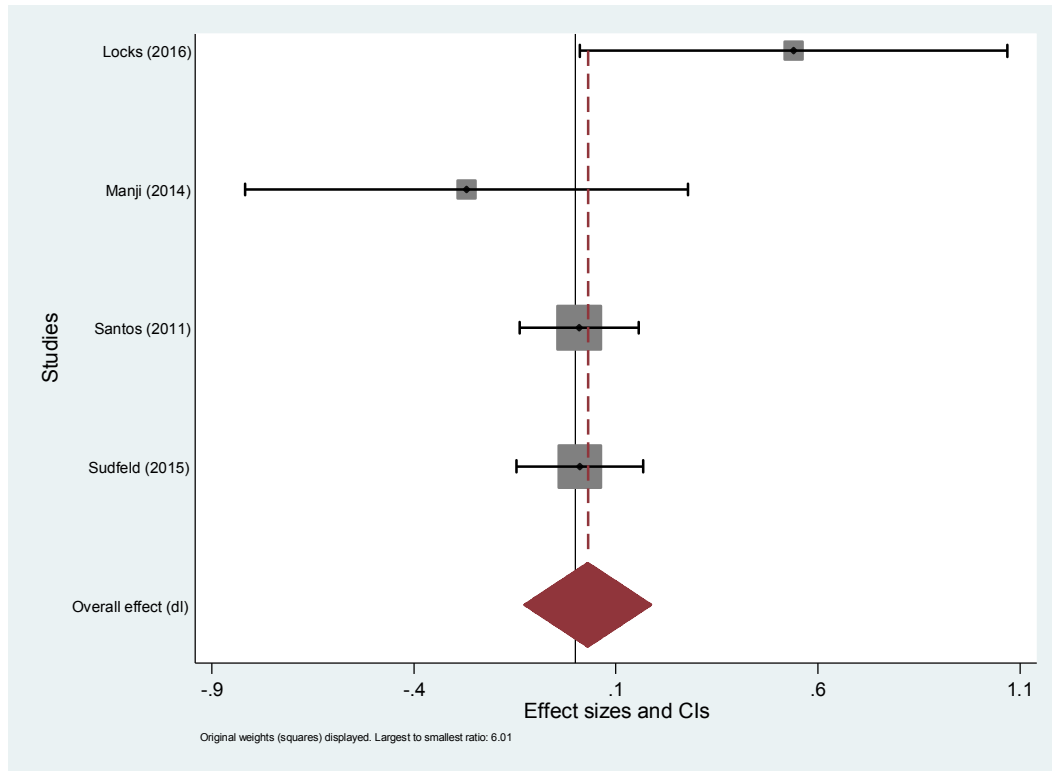

**Figure 39: Association between severe SGA (reference: AGA) and language development.**

4. Parental Risk Factors on Child's Cognitive Development

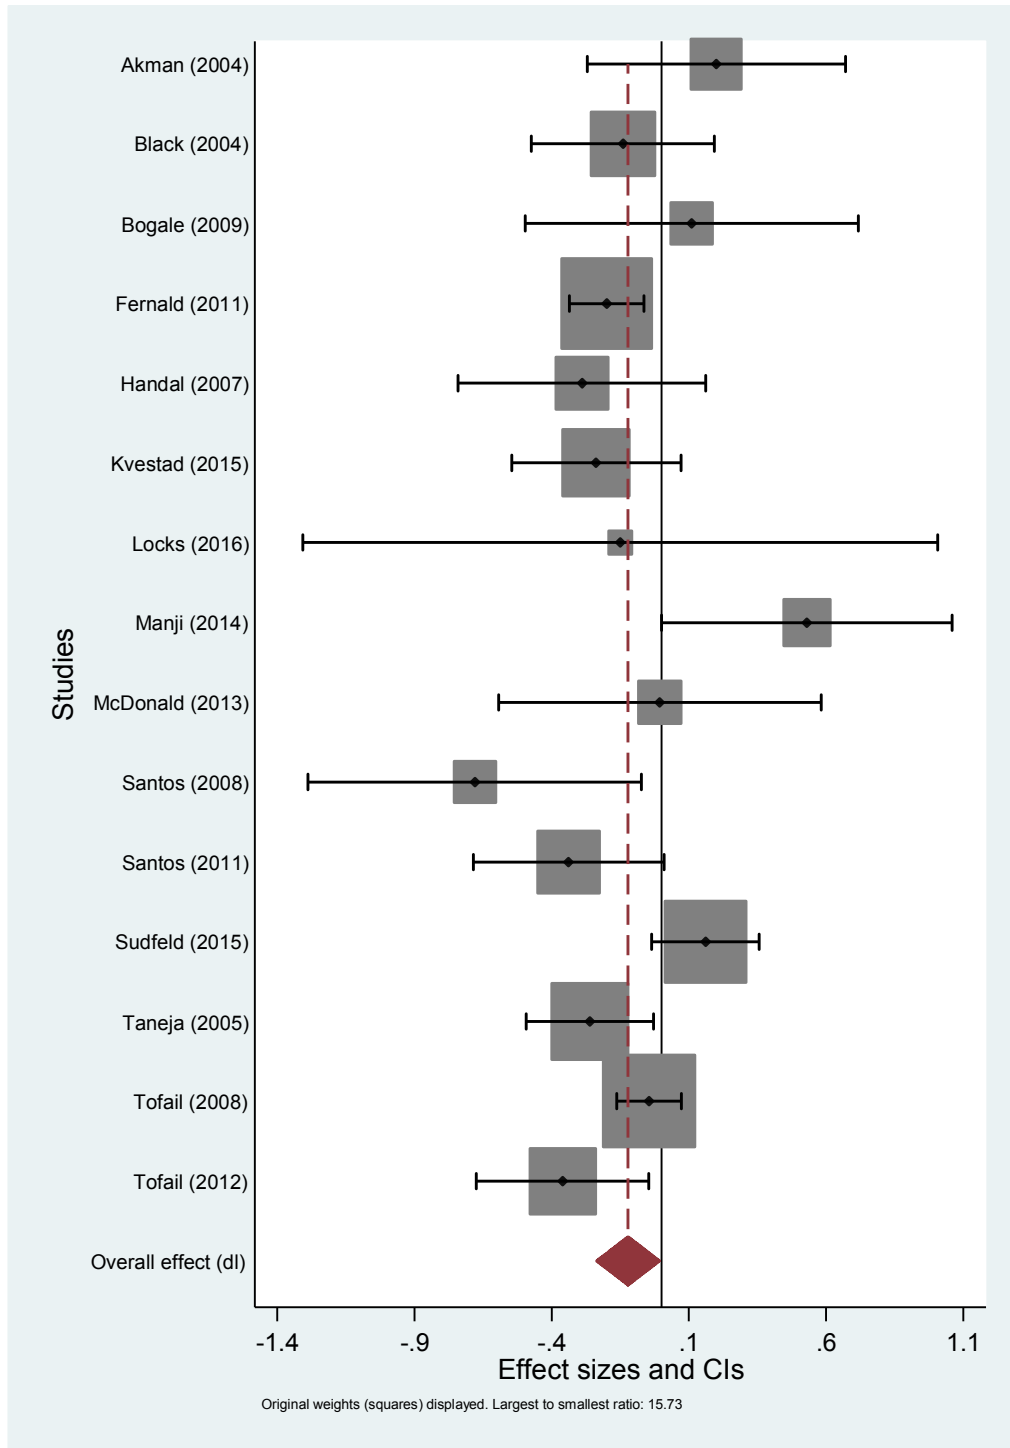

Figure 40: Association between no maternal education (reference: primary education) and cognitive development.

1  
2  
3  
4  
5  
6  
7  
8  
9  
10  
11  
12  
13  
14  
15  
16  
17  
18  
19  
20  
21  
22  
23  
24  
25  
26  
27  
28  
29  
30  
31  
32  
33  
34  
35  
36  
37  
38  
39  
40  
41  
42  
43  
44  
45  
46  
47  
48  
49  
50  
51  
52  
53  
54  
55  
56  
57  
58  
59  
60

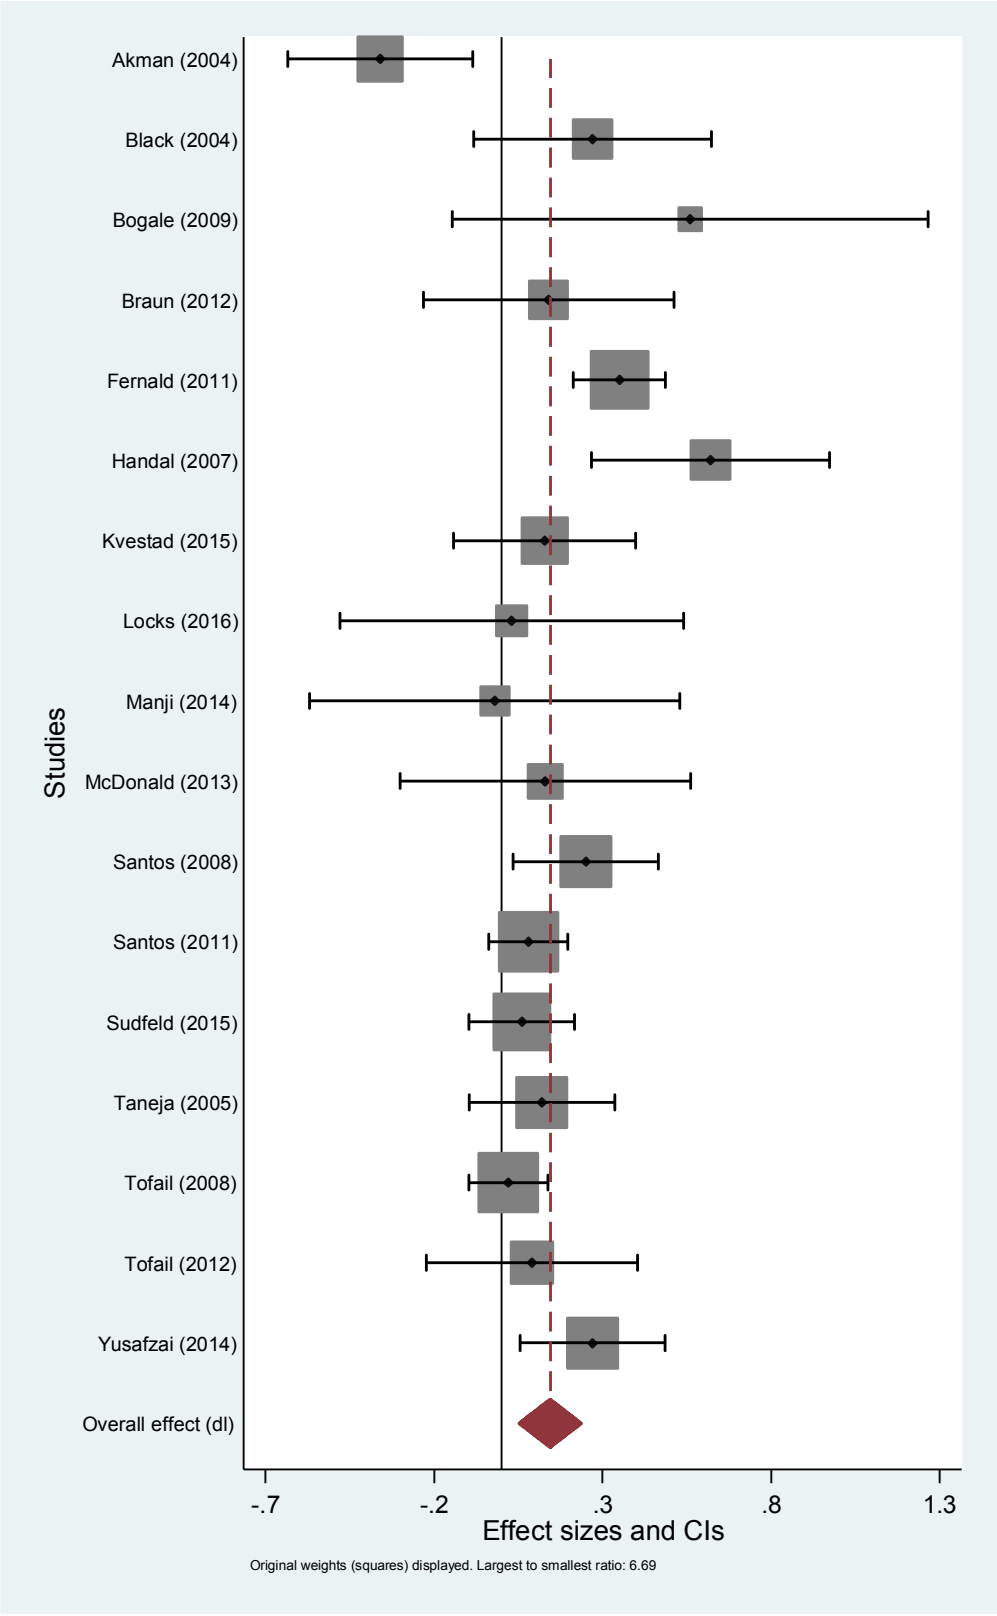

Figure 41: Association between maternal secondary education (reference: primary education) and cognitive development.

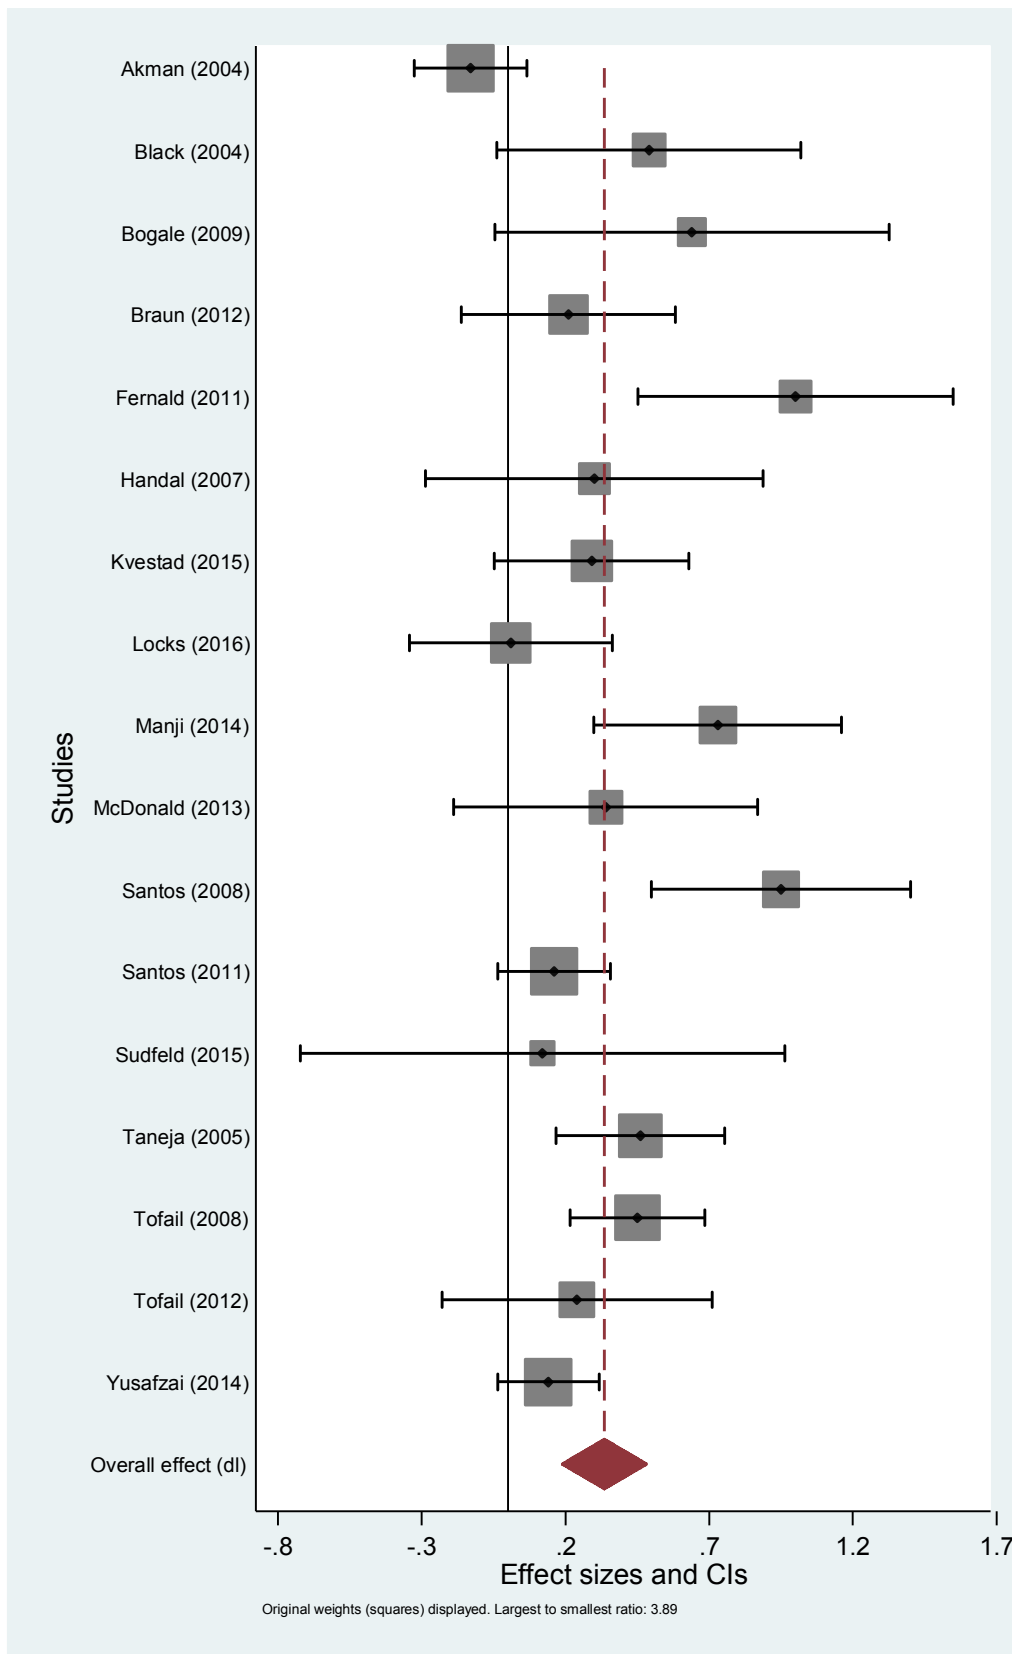

Figure 42: Association between maternal higher education (reference: primary education) and cognitive development.

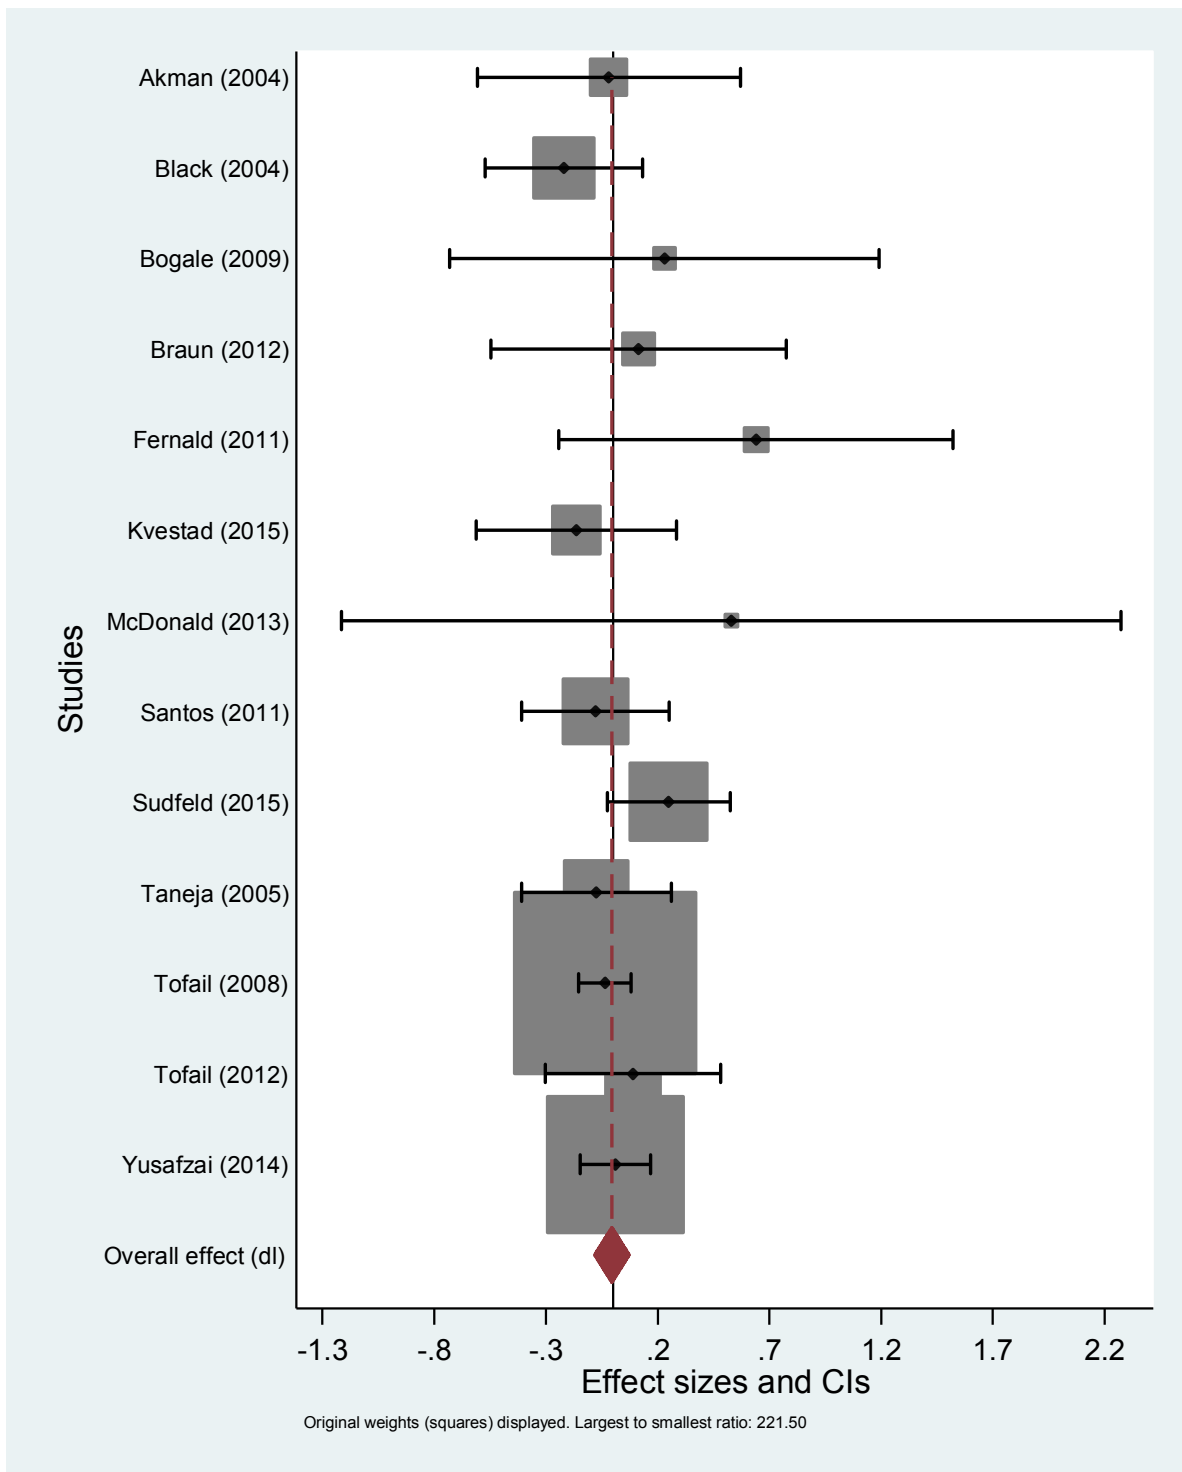

Figure 43: Association between no paternal education (reference: primary education) and cognitive development.

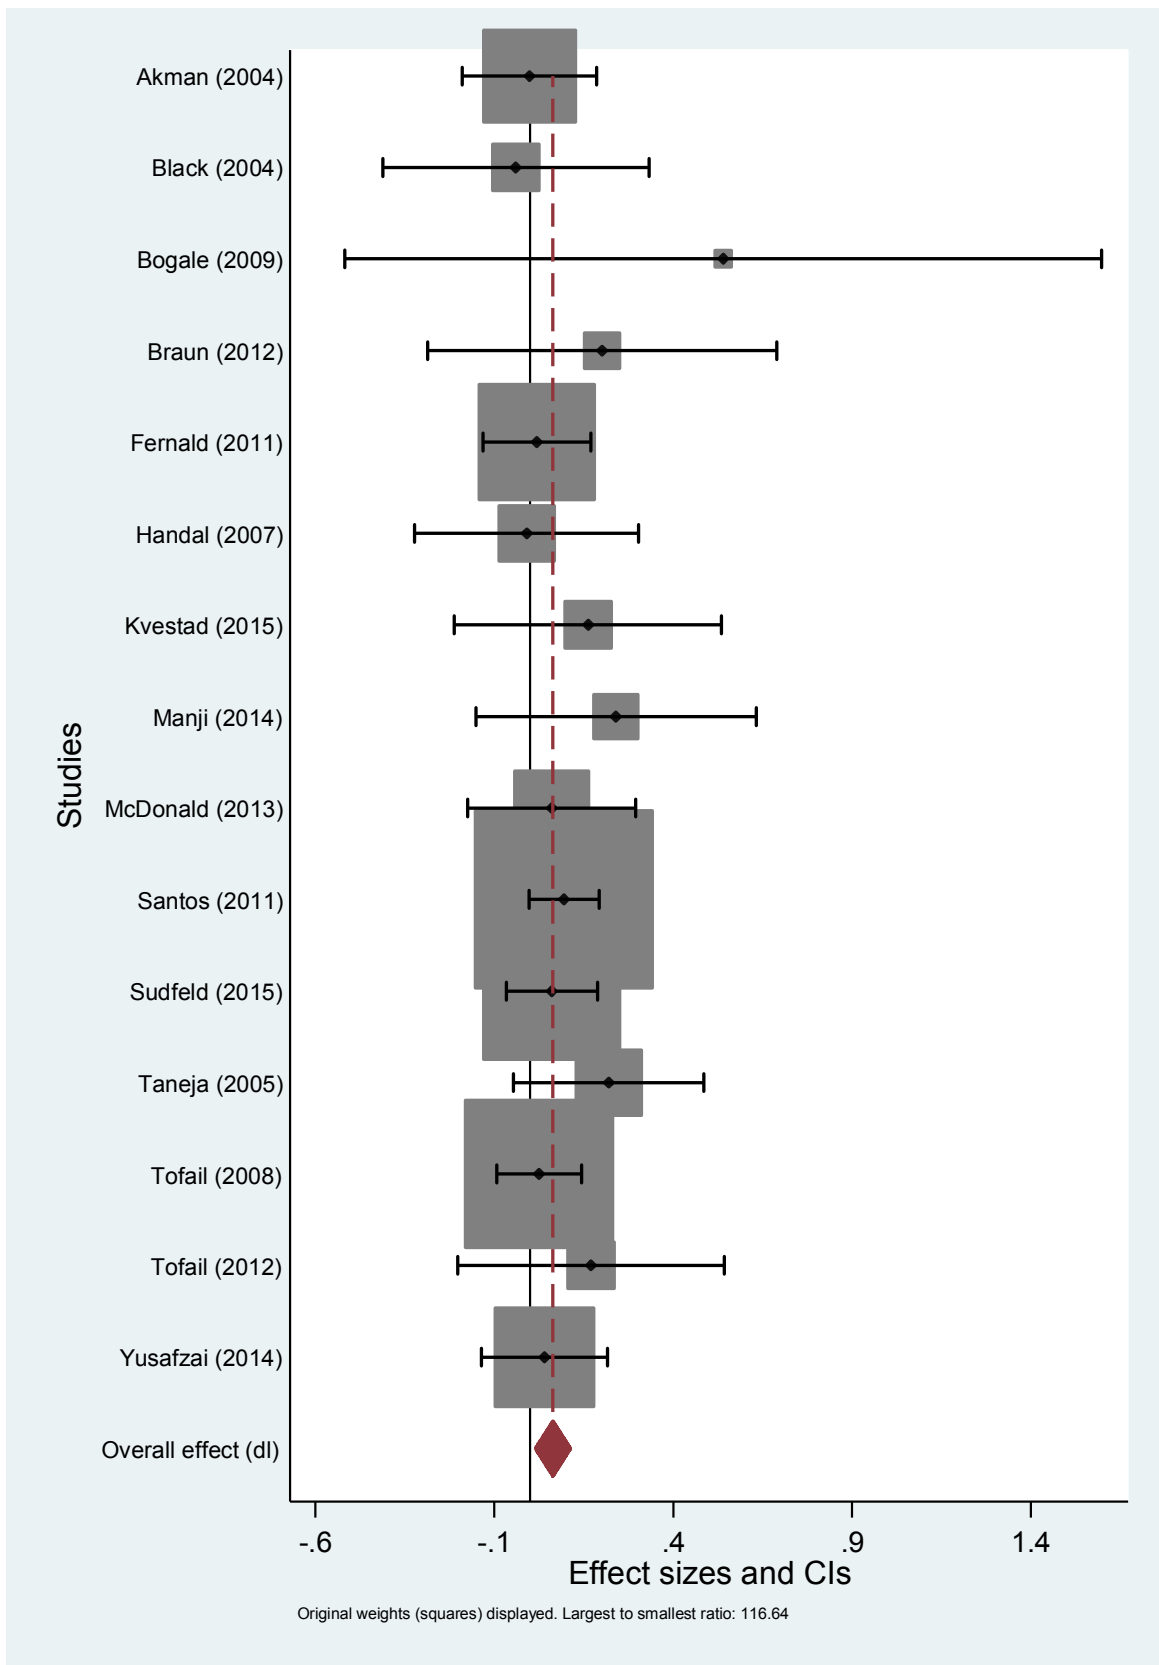

Figure 44: Association between paternal secondary education (reference: primary education) and cognitive development.



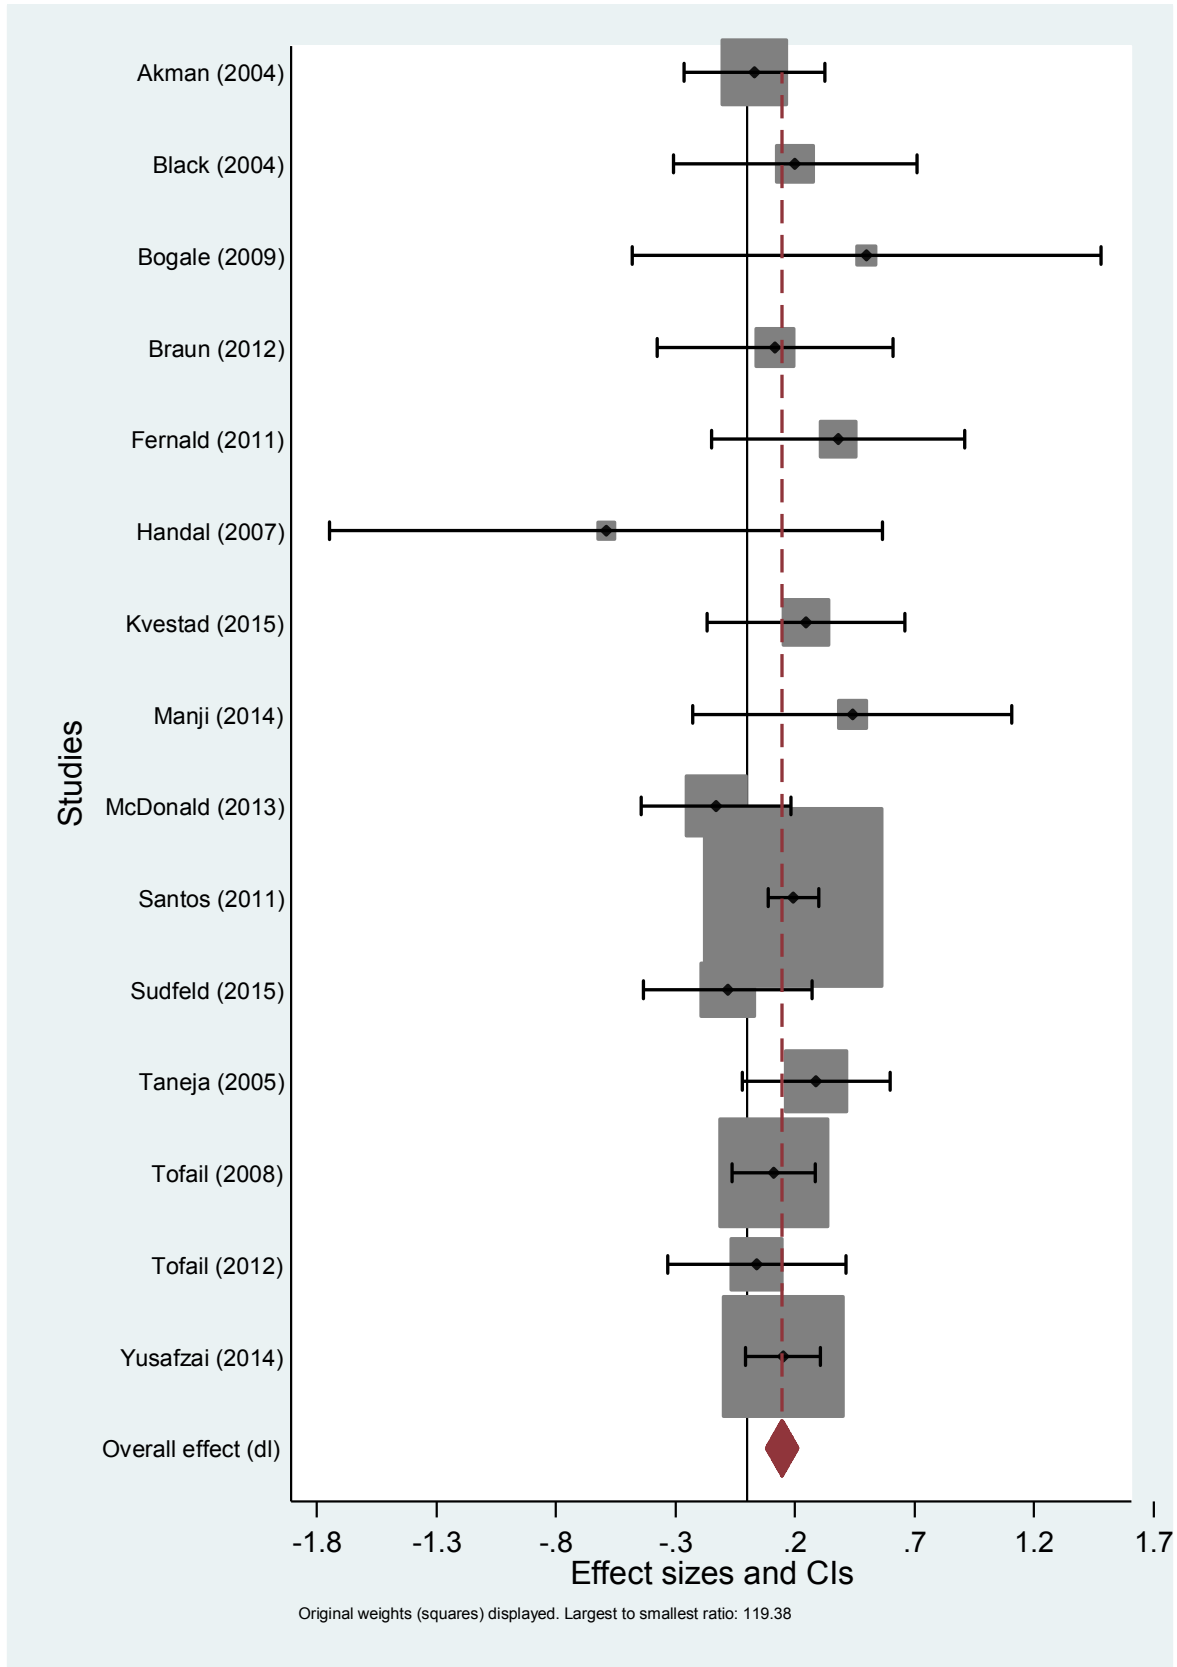

Figure 45: Association between paternal higher education (reference: primary education) and cognitive development.

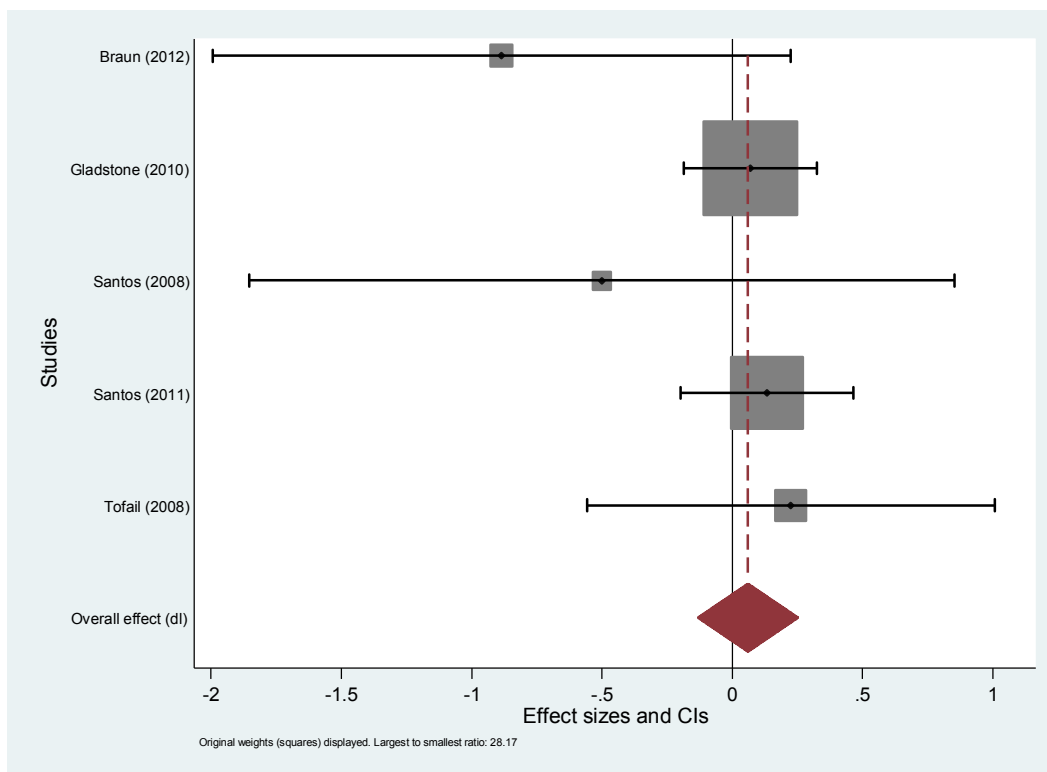

**Figure 46: Association between maternal ages < 15 (reference: ages 20-34) and cognitive development.**

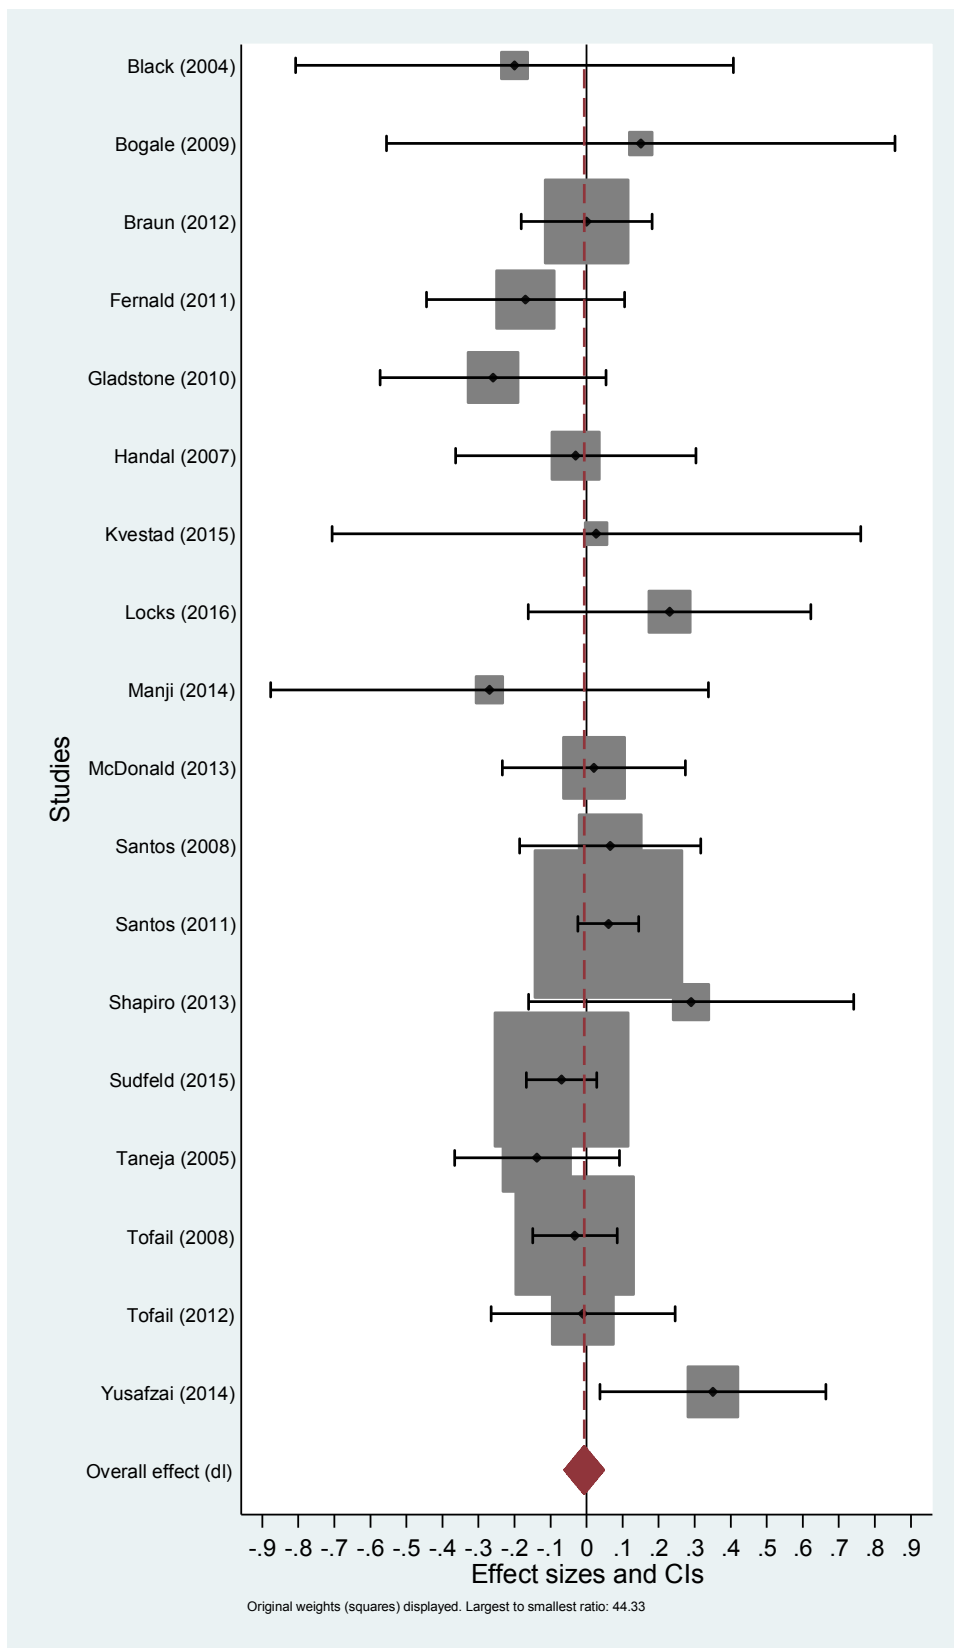

Figure 47: Association between maternal ages 15-20 (reference: ages 20-34) and cognitive development.

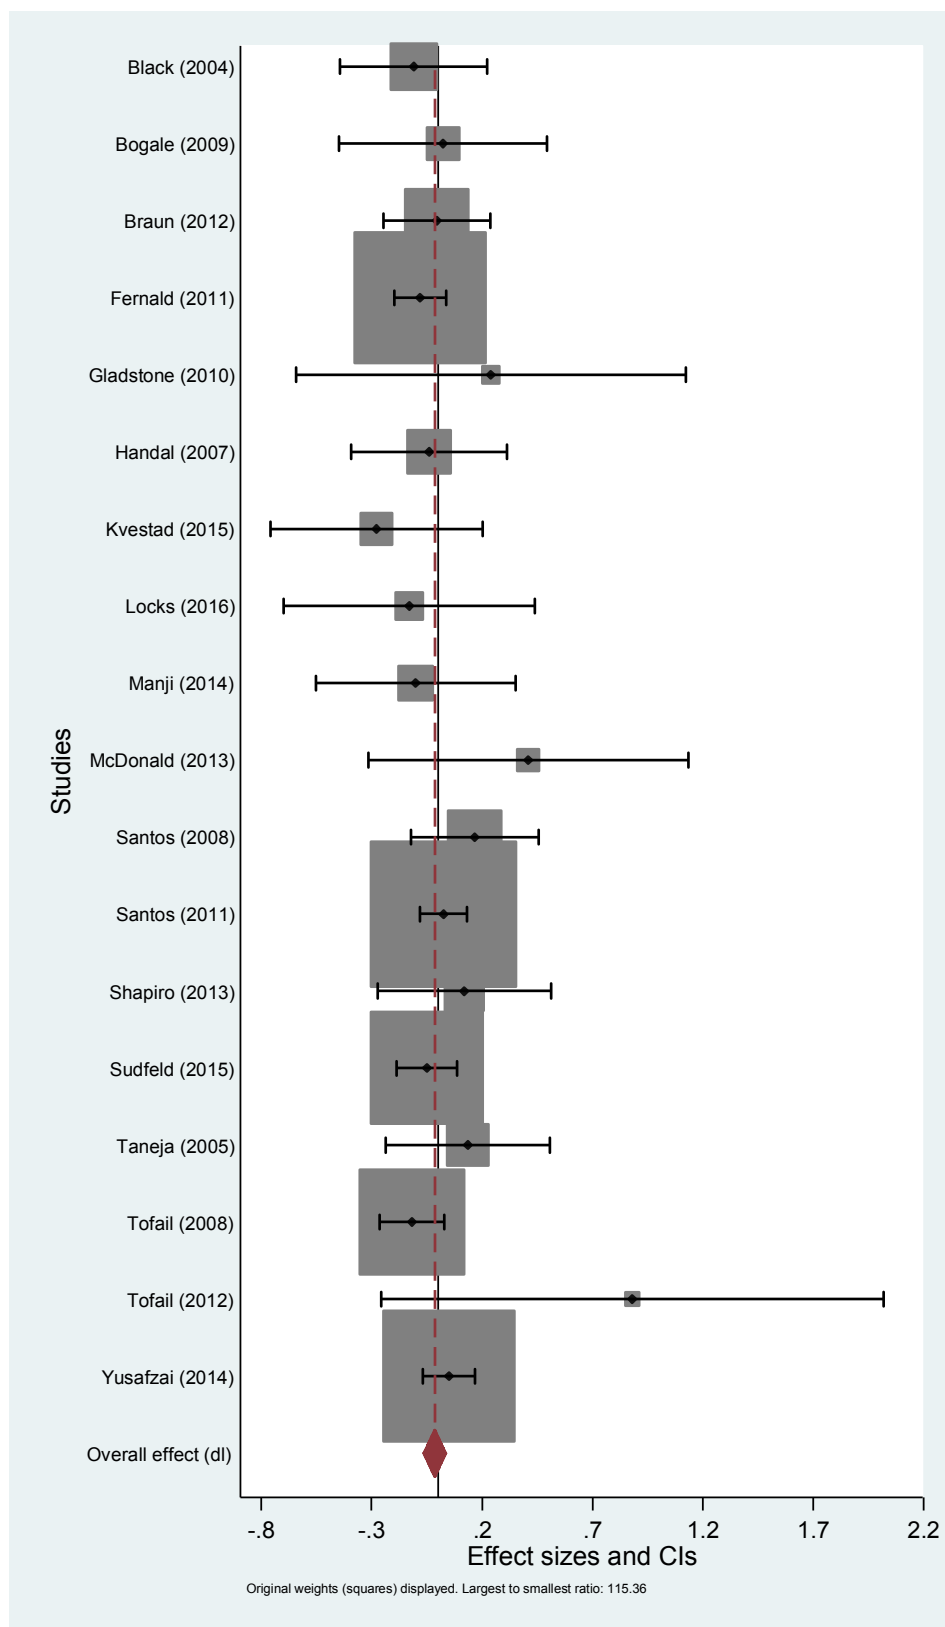

Figure 48: Association between maternal ages >35 (reference: ages 20-34) and cognitive development.

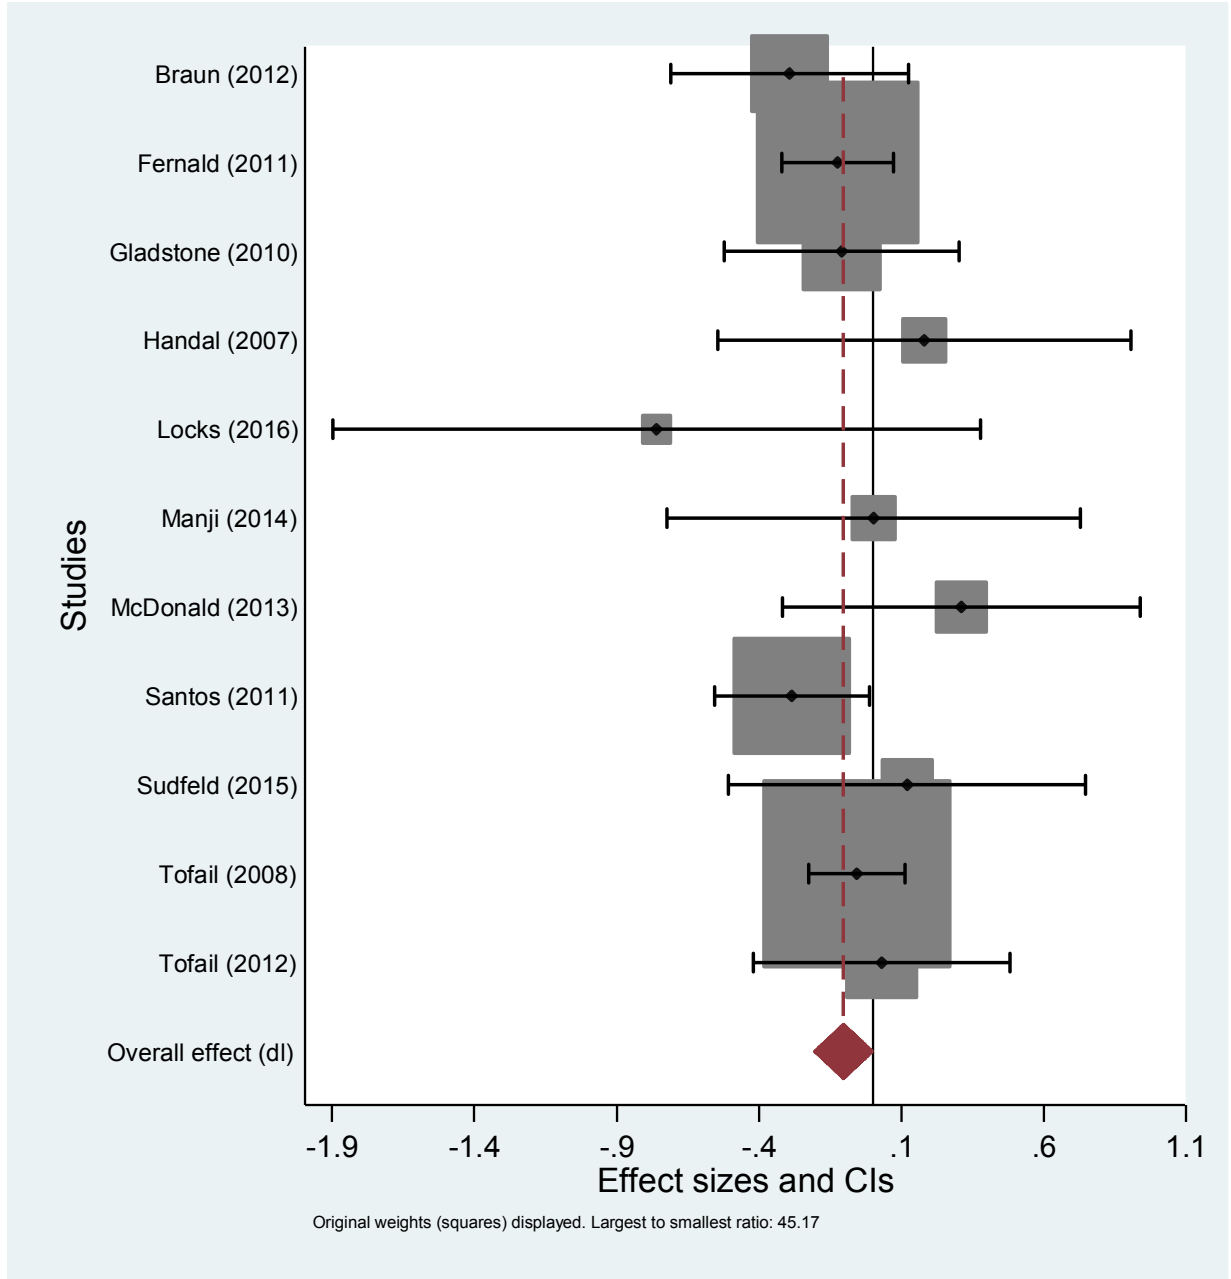

**Figure 49: Association between maternal height < 145cm (reference: >155 cm) and cognitive development.**

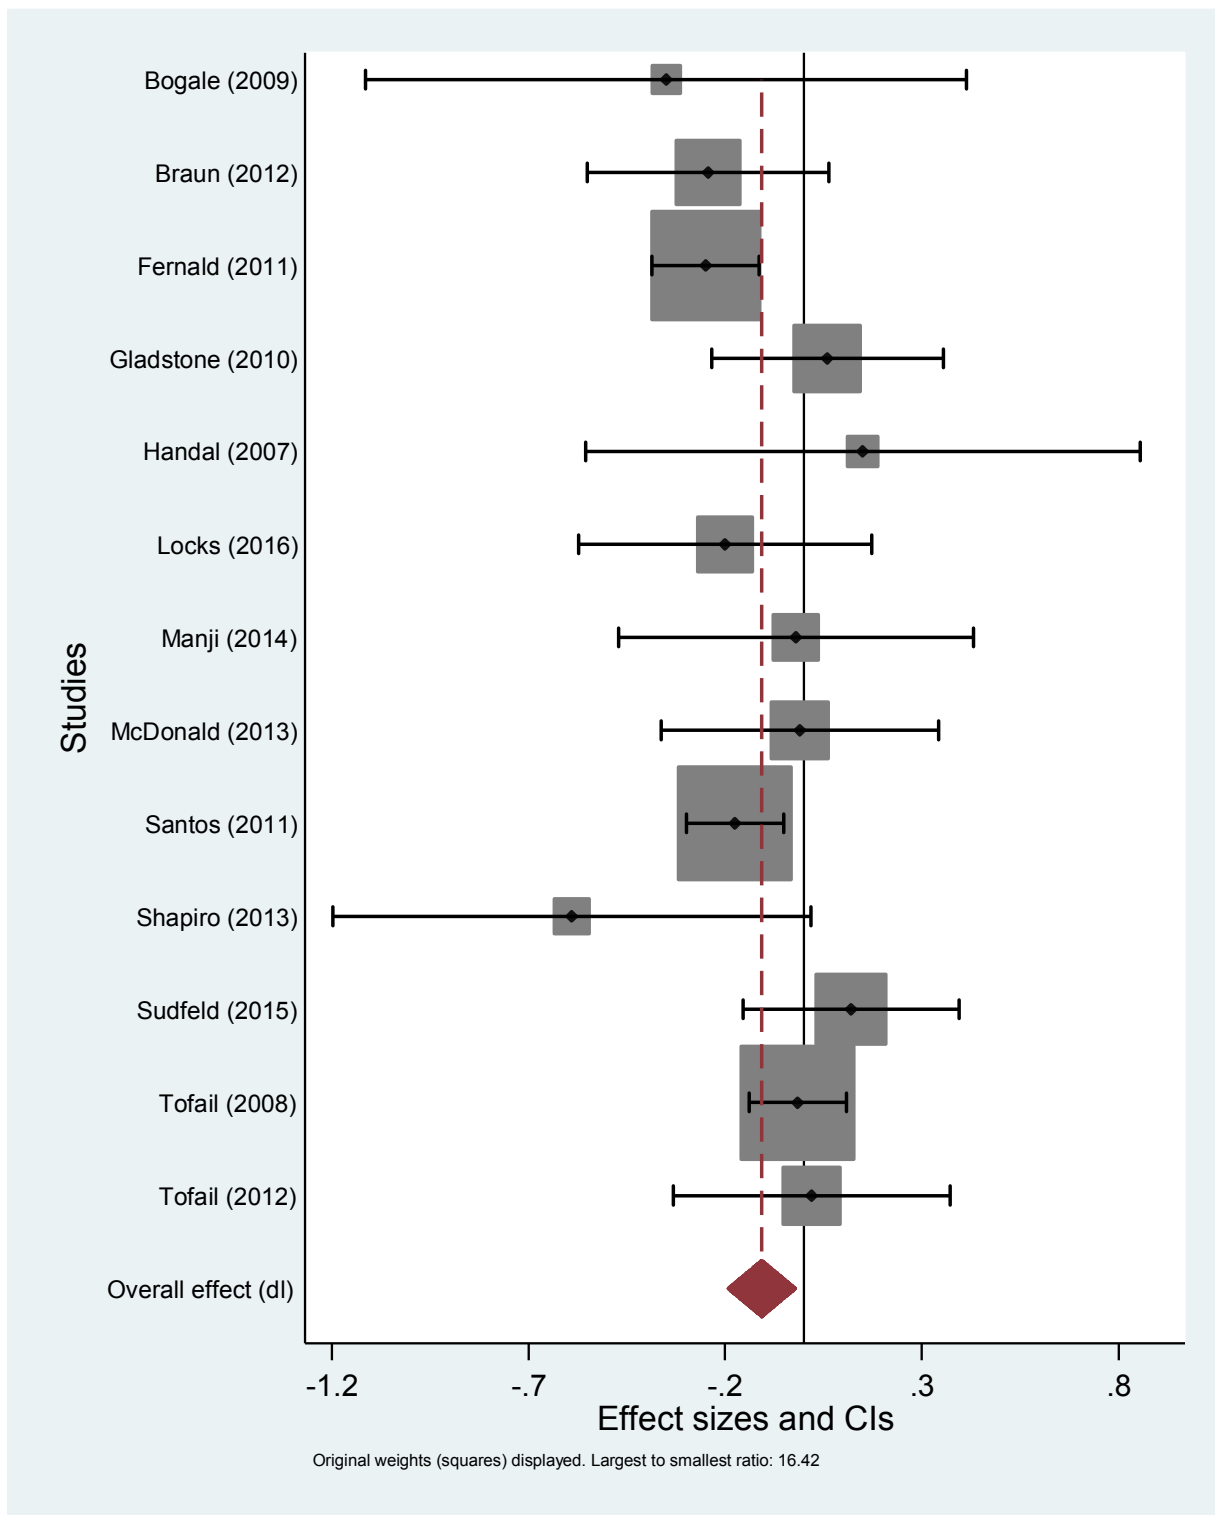

Figure 50: Association between maternal height 145-150cm (reference: >155 cm) and cognitive development.

1  
2  
3  
4  
5  
6  
7  
8  
9  
10  
11  
12  
13  
14  
15  
16  
17  
18  
19  
20  
21  
22  
23  
24  
25  
26  
27  
28  
29  
30  
31  
32  
33  
34  
35  
36  
37  
38  
39  
40  
41  
42  
43  
44  
45  
46  
47  
48  
49  
50  
51  
52  
53  
54  
55  
56  
57  
58  
59  
60

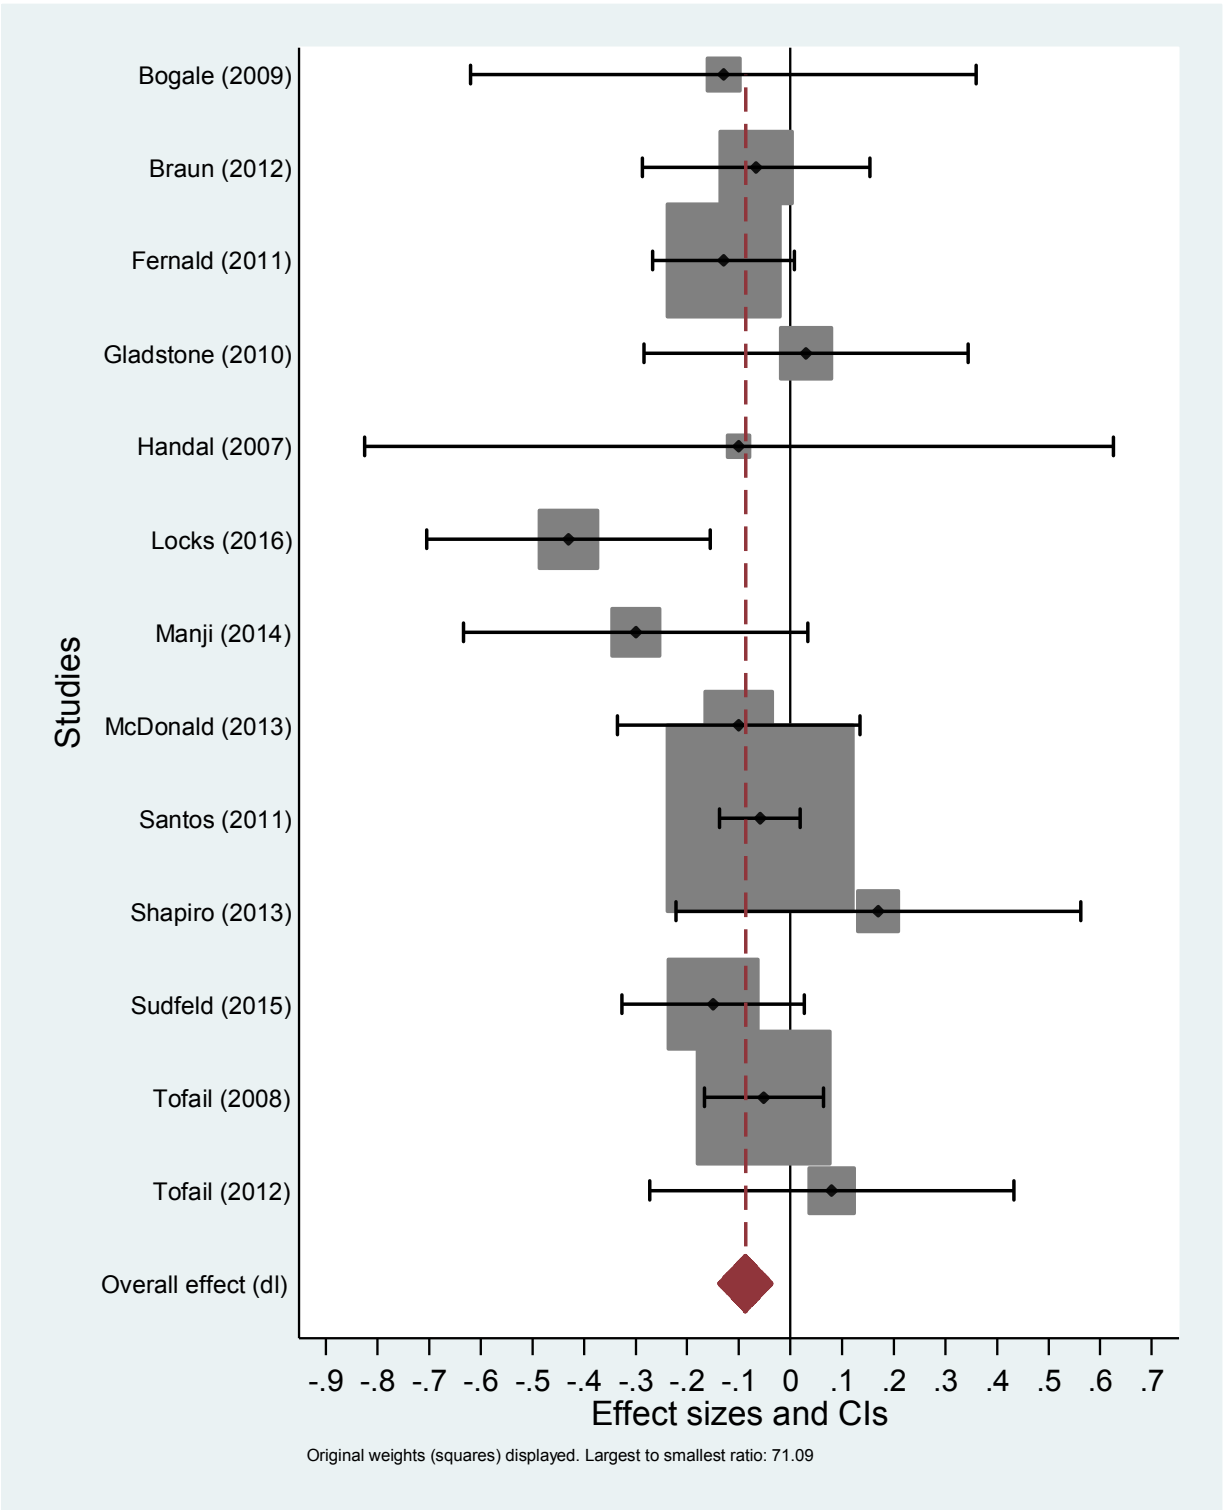

Figure 51: Association between maternal height 150-155 cm (reference: >155 cm) and cognitive development.

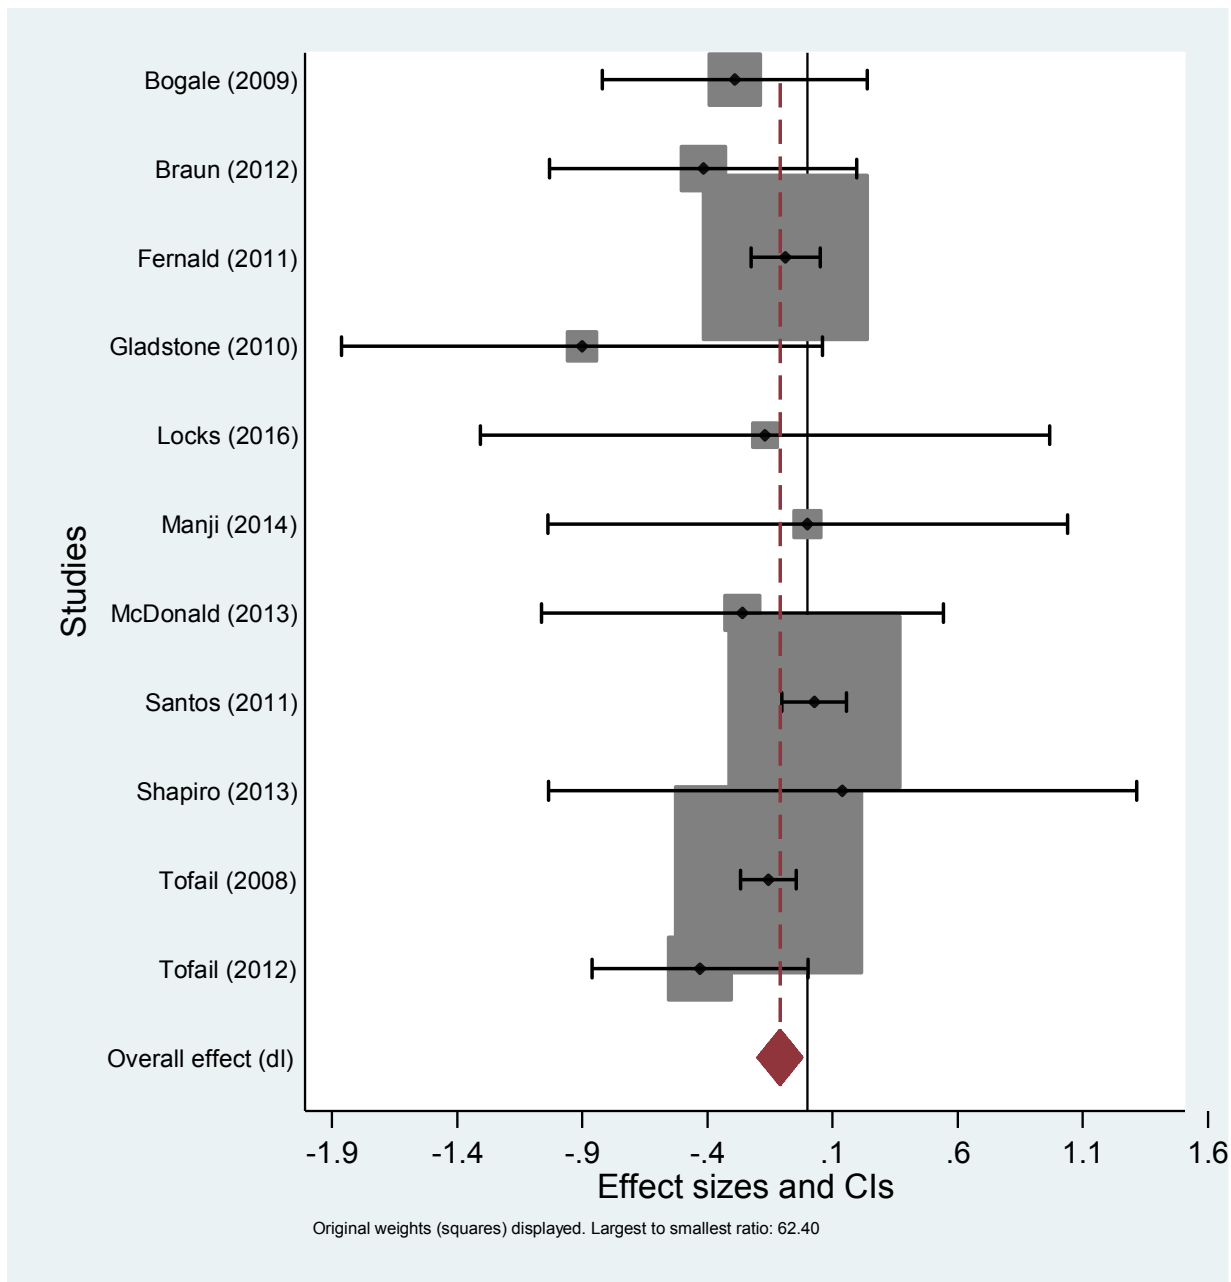

**Figure 52: Association between maternal BMI <18.5 kg/m<sup>2</sup> (reference: 18.5-25) and cognitive development.**



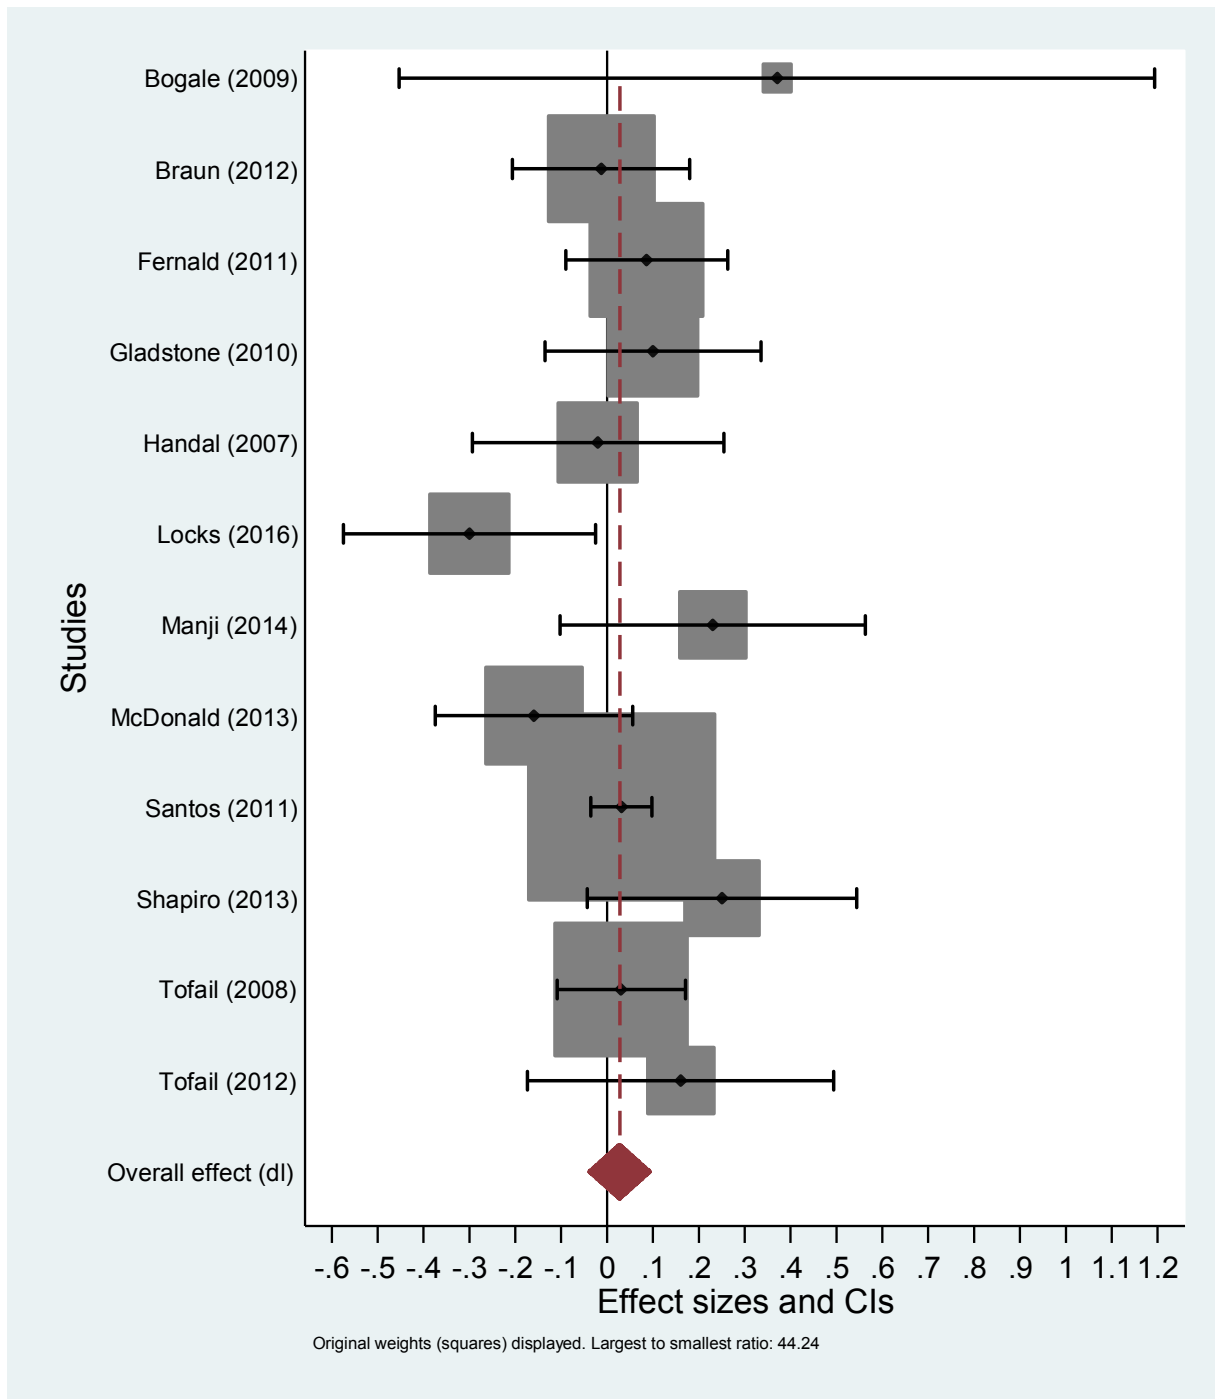

Figure 53: Association between maternal BMI 25-30 kg/m<sup>2</sup> (reference: 18.5-25) and cognitive development.

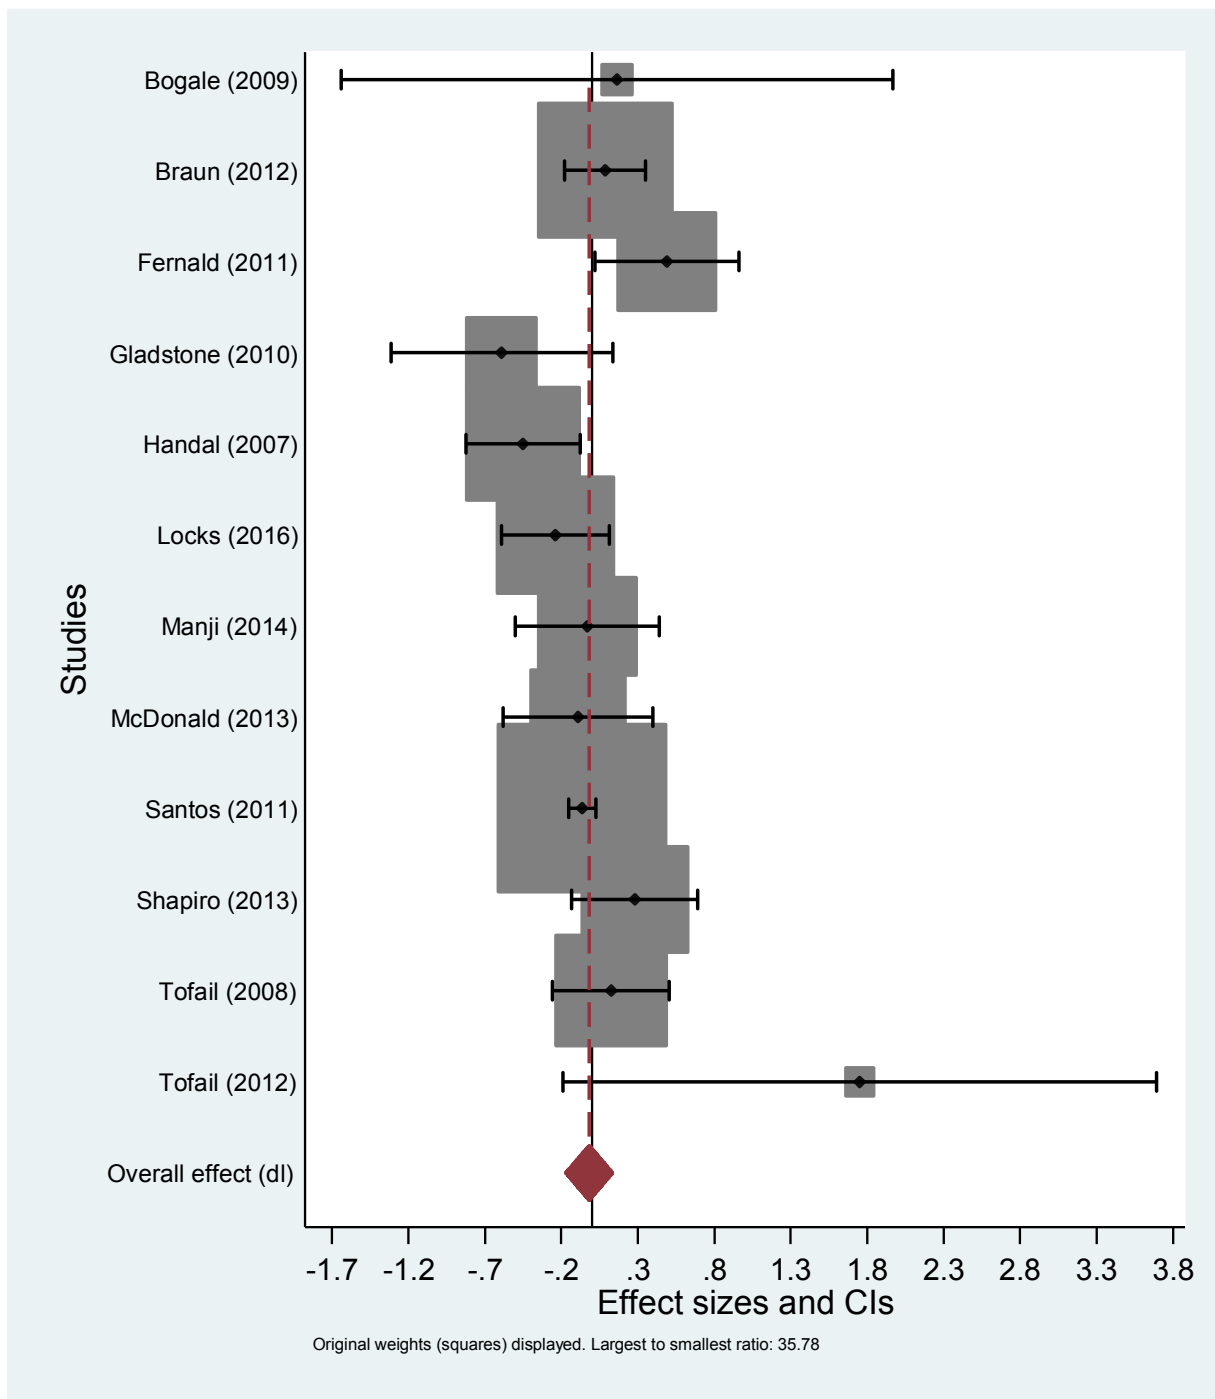

Figure 54: Association between maternal BMI >30 kg/m<sup>2</sup> (reference: 18.5-25) and cognitive development.

1  
2  
3  
4  
5  
6  
7  
8  
9  
10  
11  
12  
13  
14  
15  
16  
17  
18  
19  
20  
21  
22  
23  
24  
25  
26  
27  
28  
29  
30  
31  
32  
33  
34  
35  
36  
37  
38  
39  
40  
41  
42  
43  
44  
45  
46  
47  
48  
49  
50  
51  
52  
53  
54  
55  
56  
57  
58  
59  
60

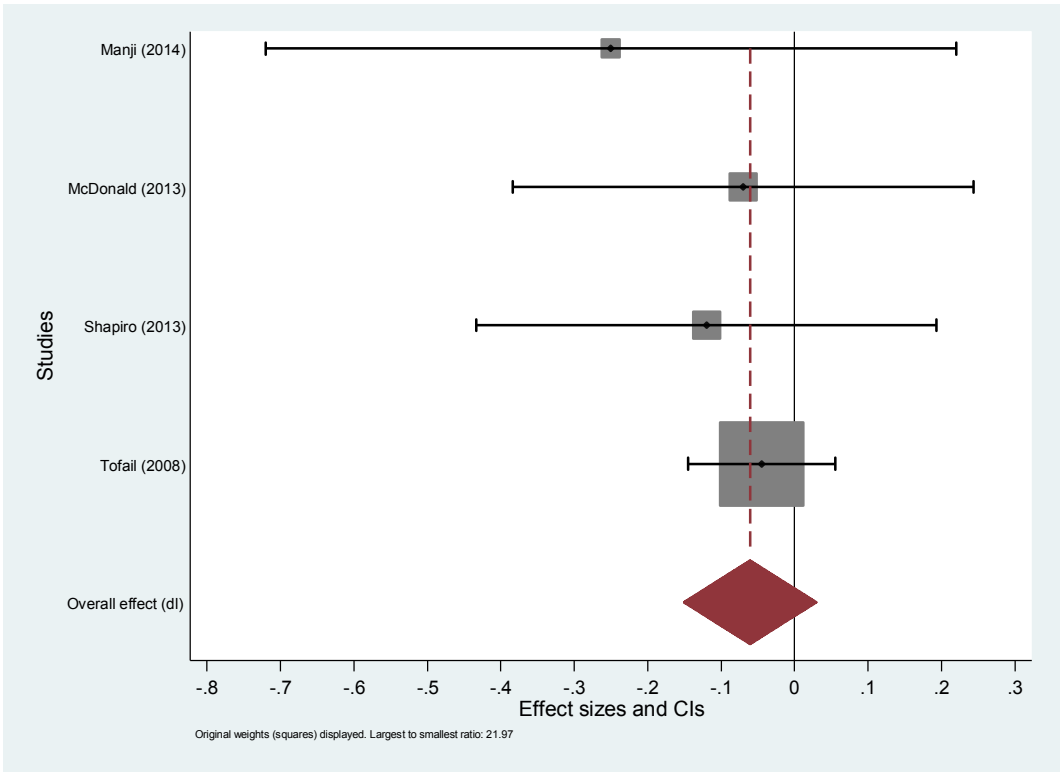

Figure 55: Association between mild anemia in pregnancy (reference: no anemia) and cognitive development.

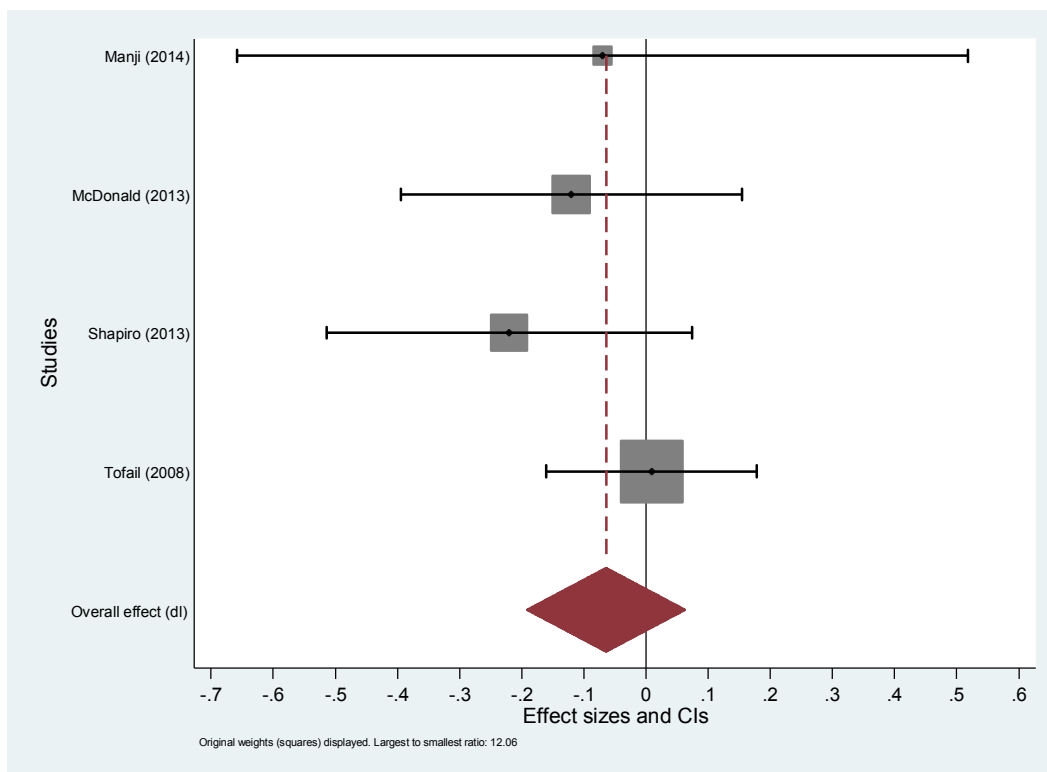

Figure 56: Association between maternal moderate anemia (reference: no anemia) and cognitive development.

5. Parental Risk Factors on Child's Motor Development

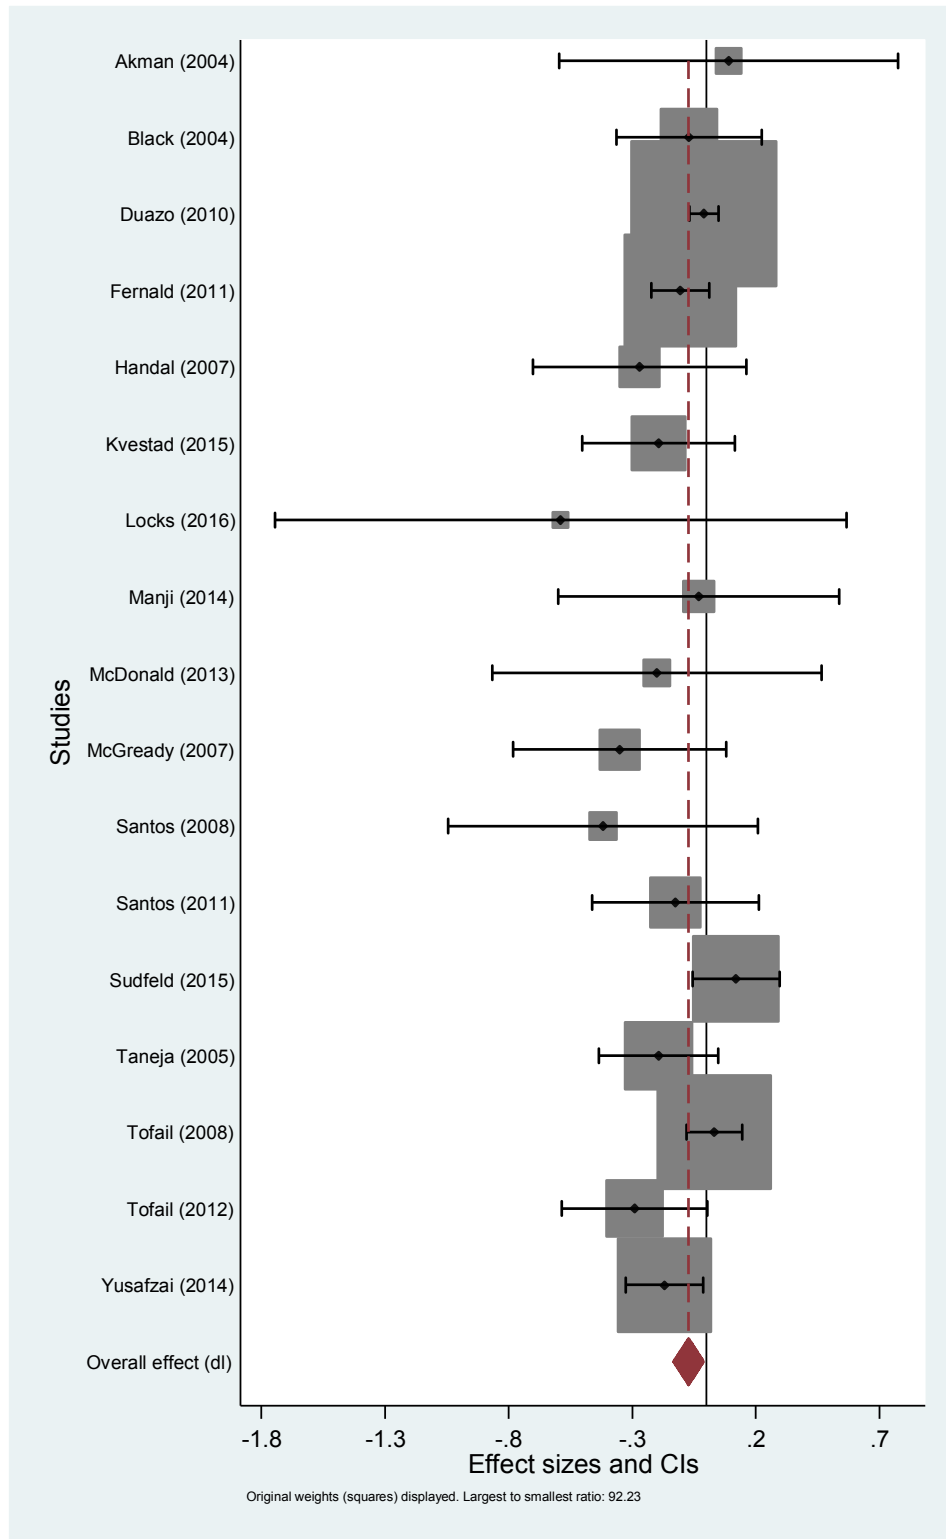

Figure 57: Association between no maternal education (reference: primary education) and motor development.

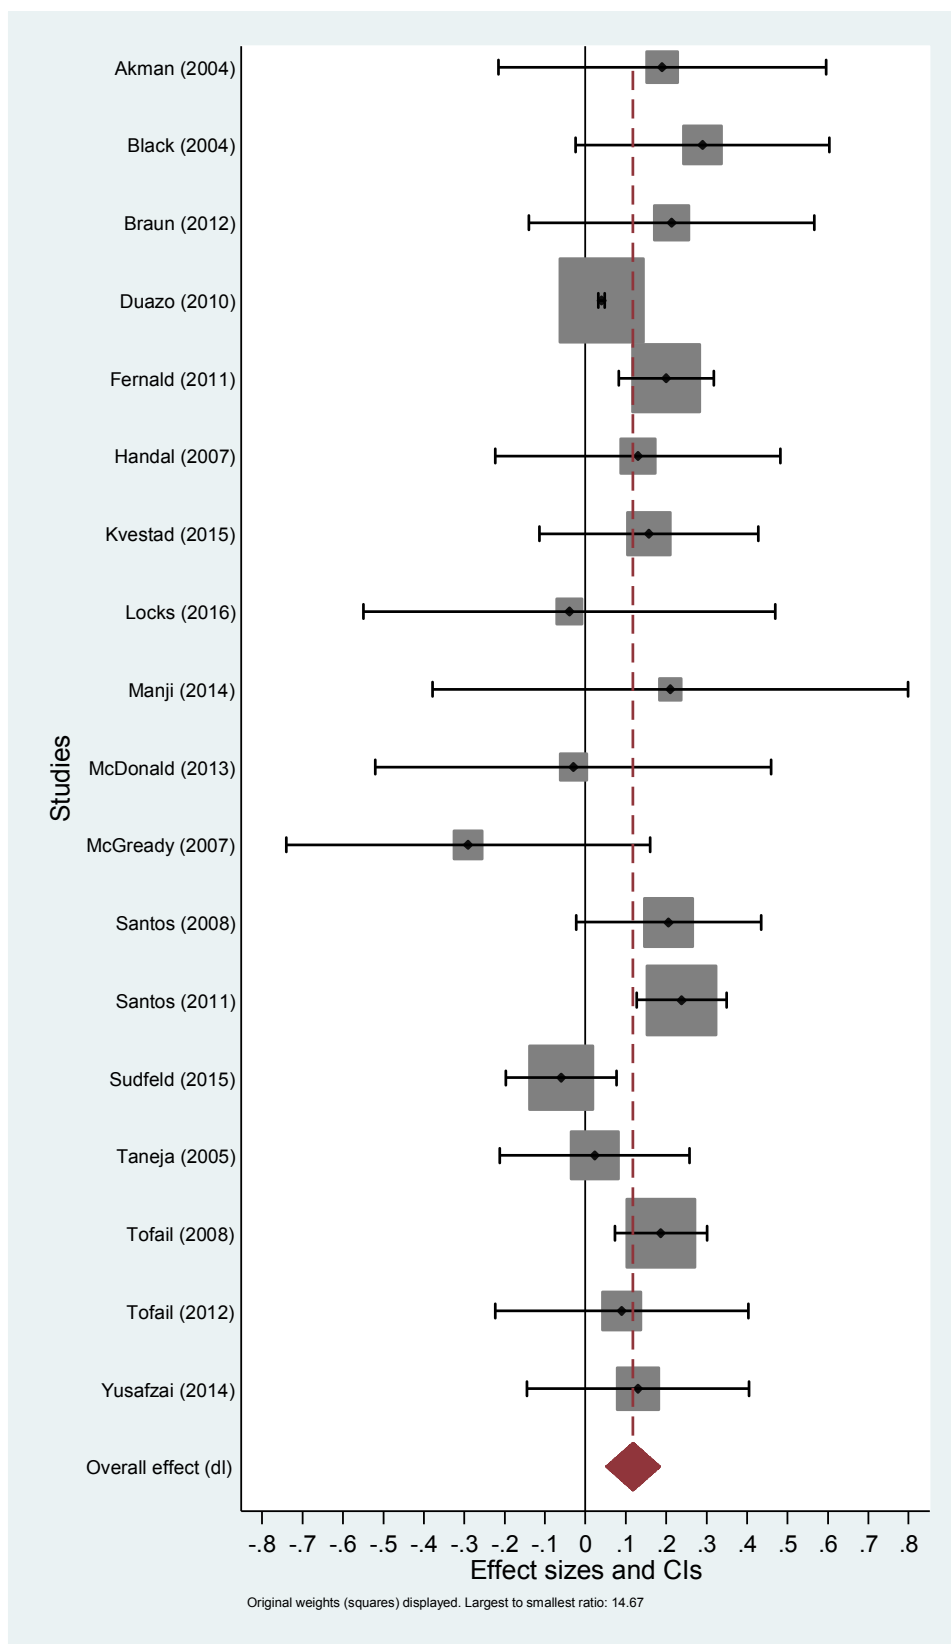

Figure 58: Association between maternal secondary education (reference: primary education) and motor development.

1  
2  
3  
4  
5  
6  
7  
8  
9  
10  
11  
12  
13  
14  
15  
16  
17  
18  
19  
20  
21  
22  
23  
24  
25  
26  
27  
28  
29  
30  
31  
32  
33  
34  
35  
36  
37  
38  
39  
40  
41  
42  
43  
44  
45  
46  
47  
48  
49  
50  
51  
52  
53  
54  
55  
56  
57  
58  
59  
60

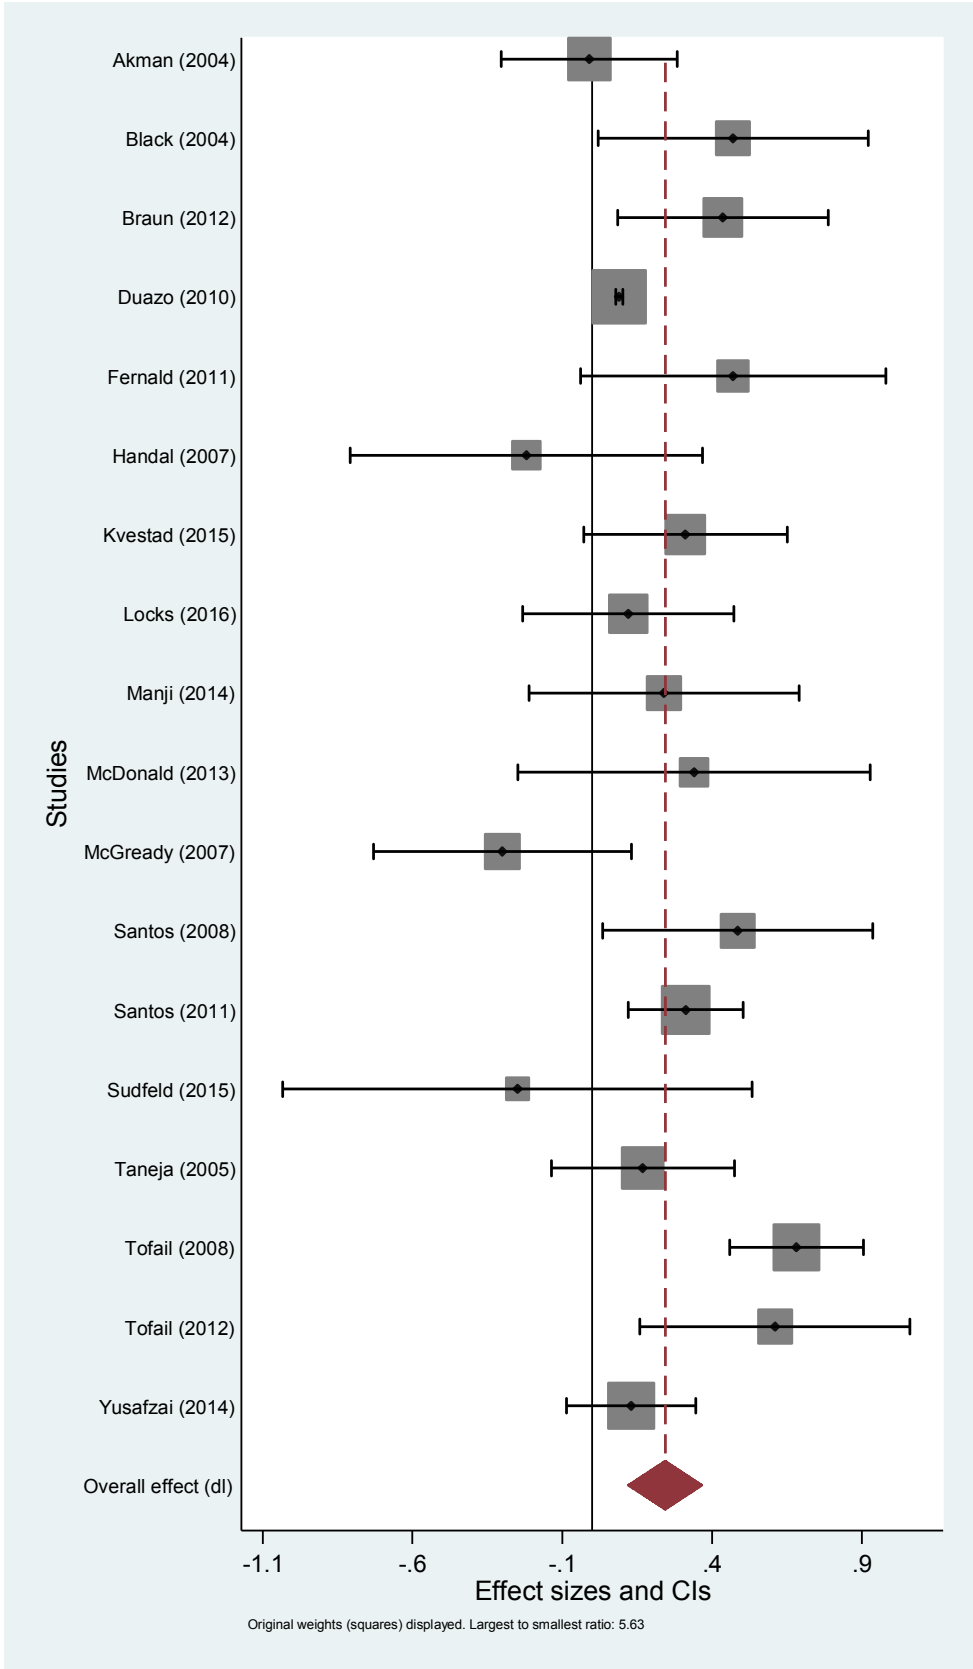

Figure 59: Association between maternal higher education (reference: primary education) and motor development.

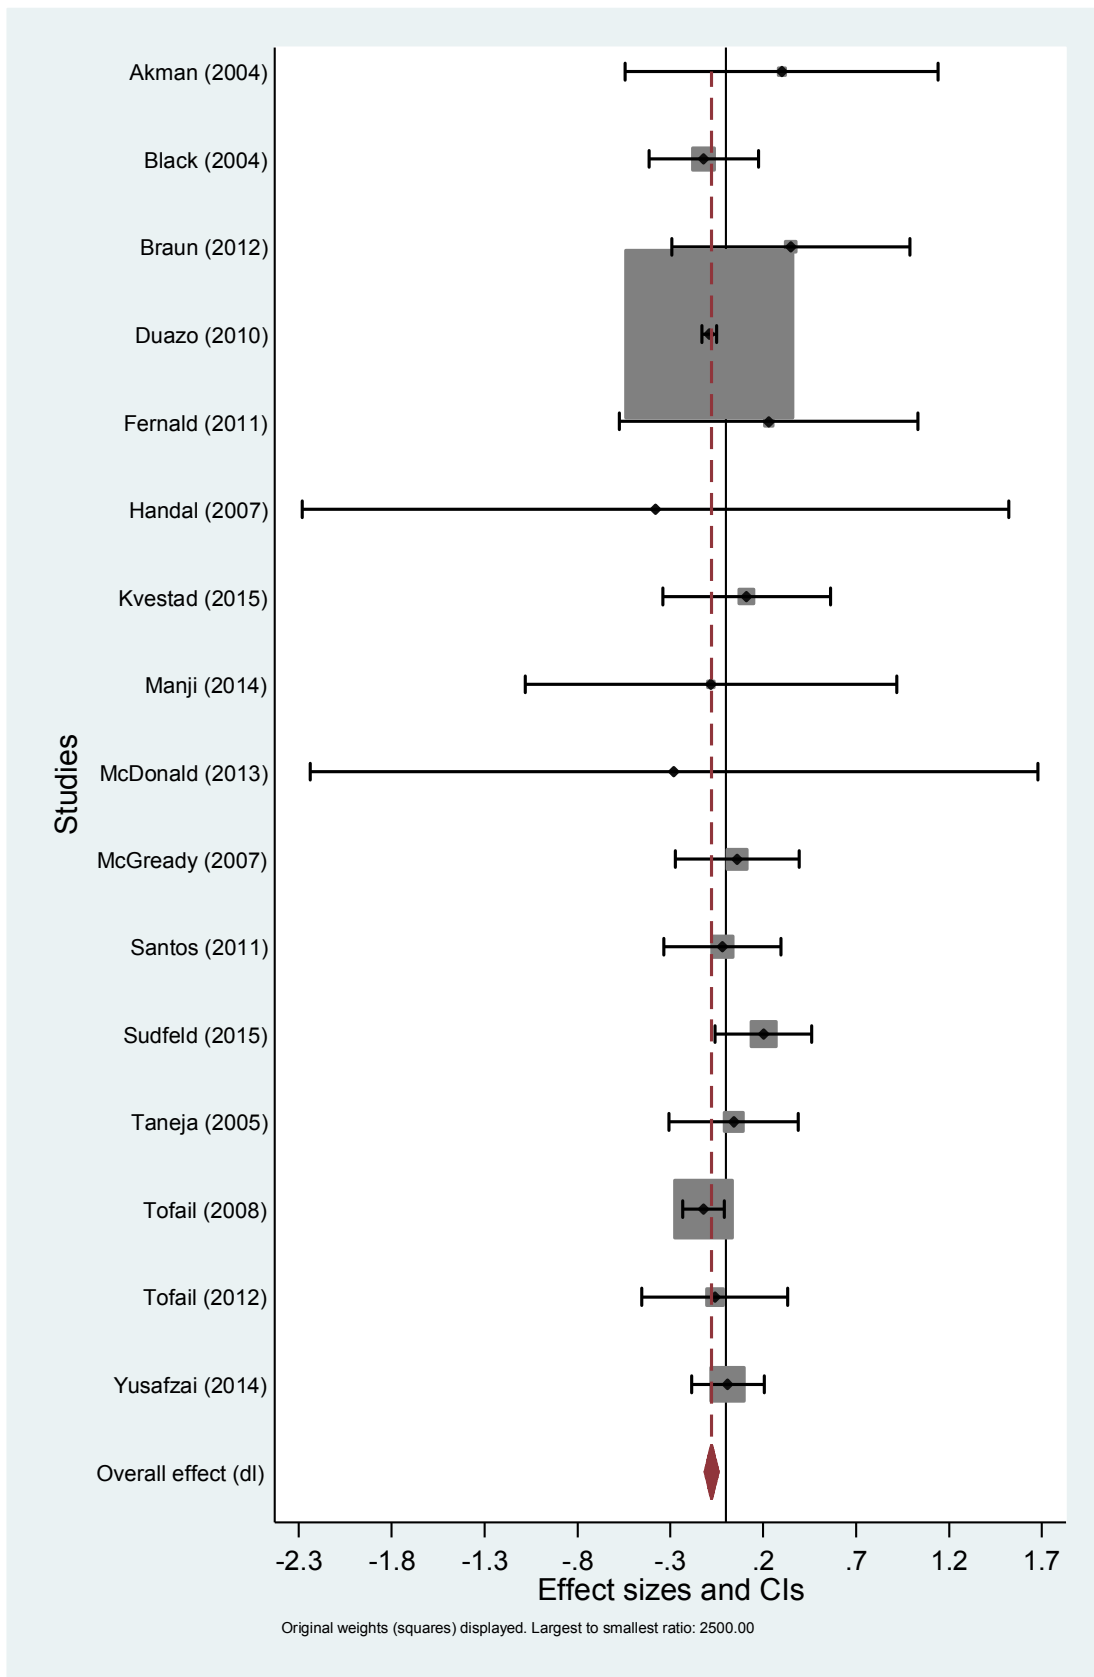

Figure 60: Association between no paternal education (reference: primary education) and motor development.



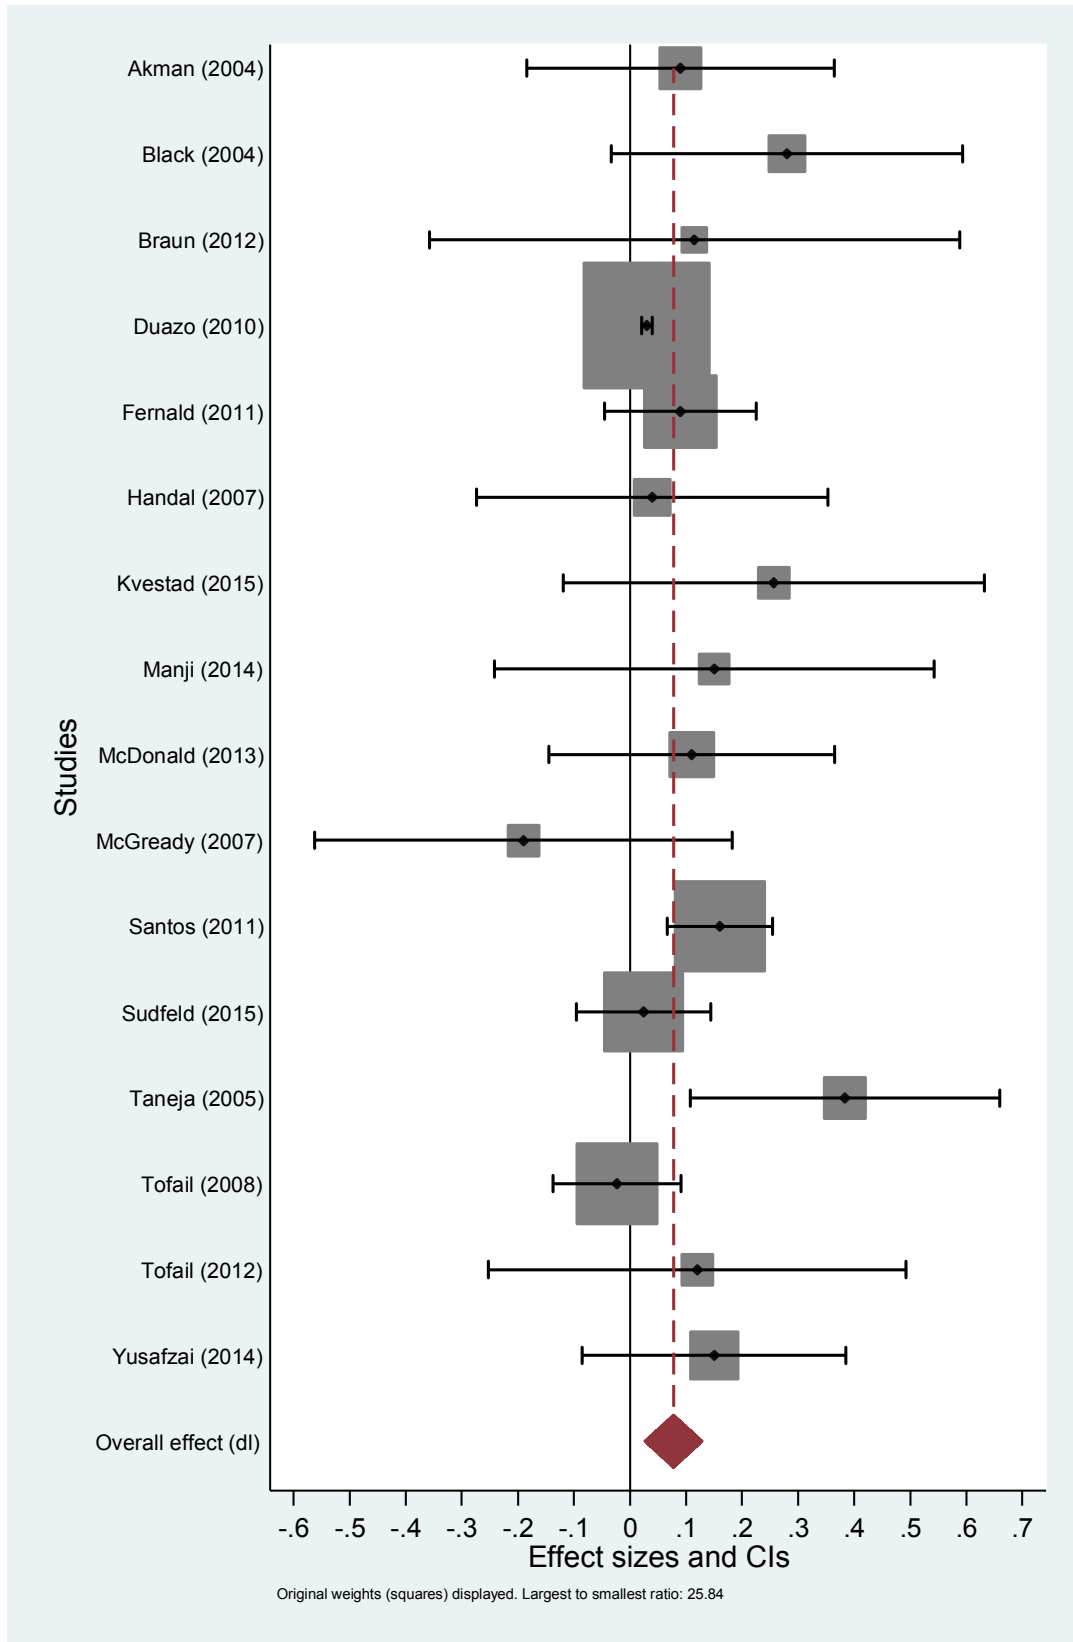

Figure 61: Association between paternal secondary education (reference: primary education) and motor development.

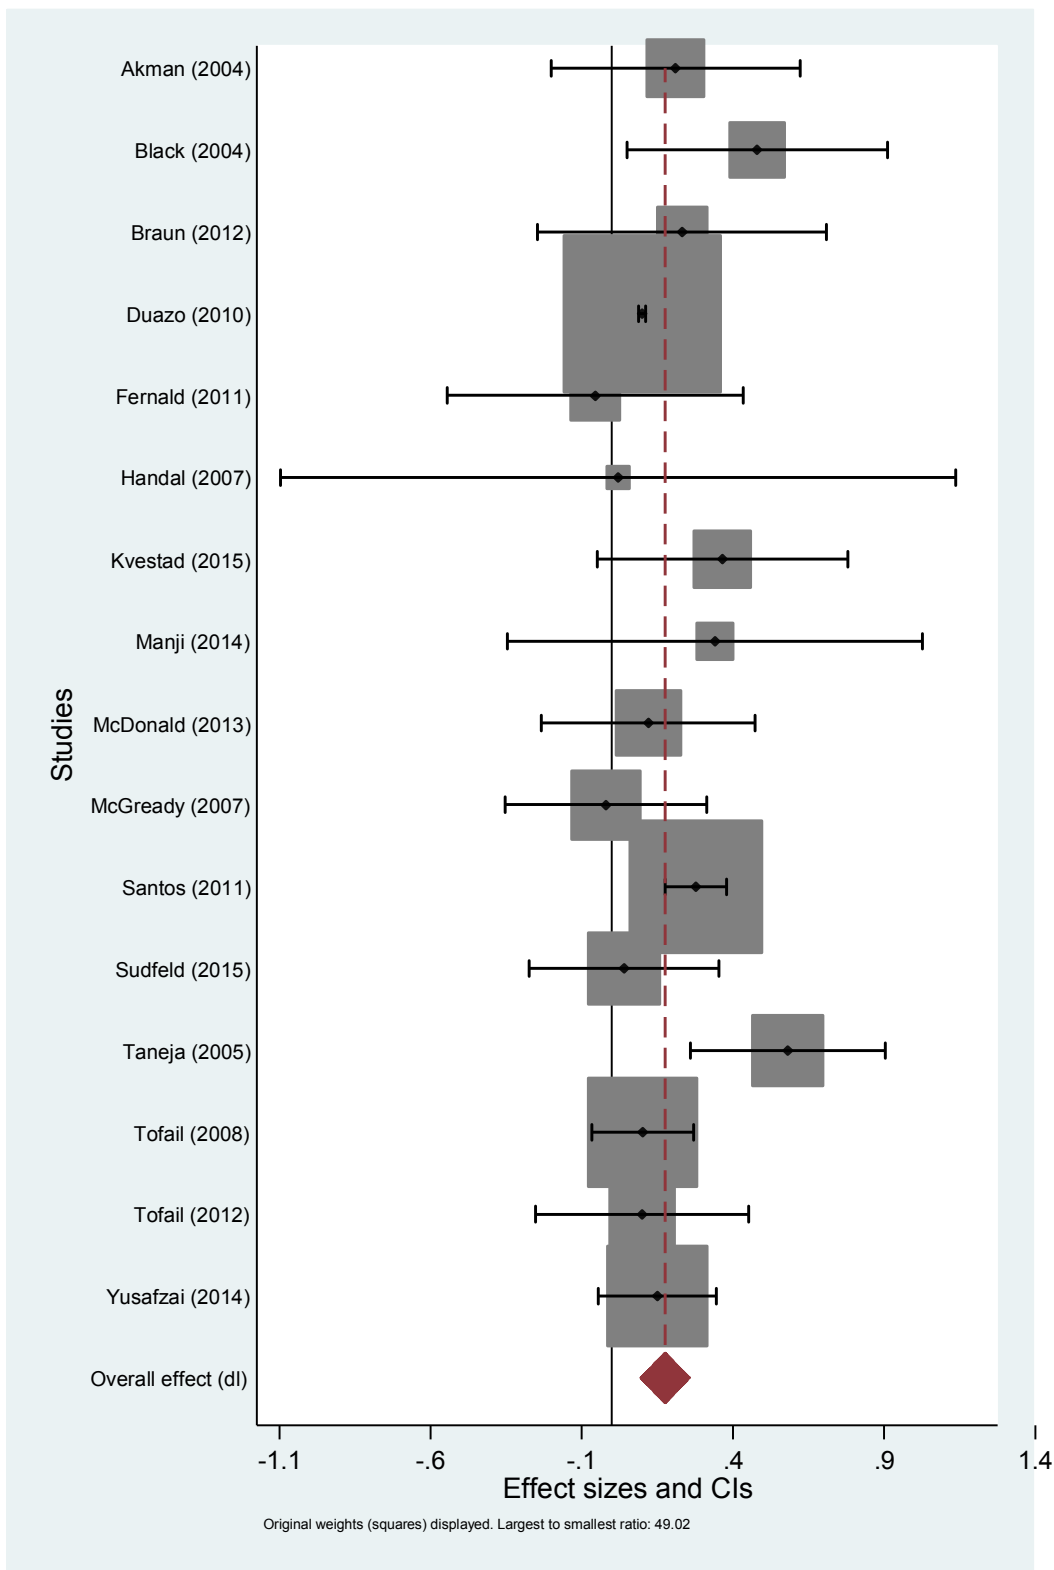

Figure 62: Association between paternal higher education (reference: primary education) and motor development.

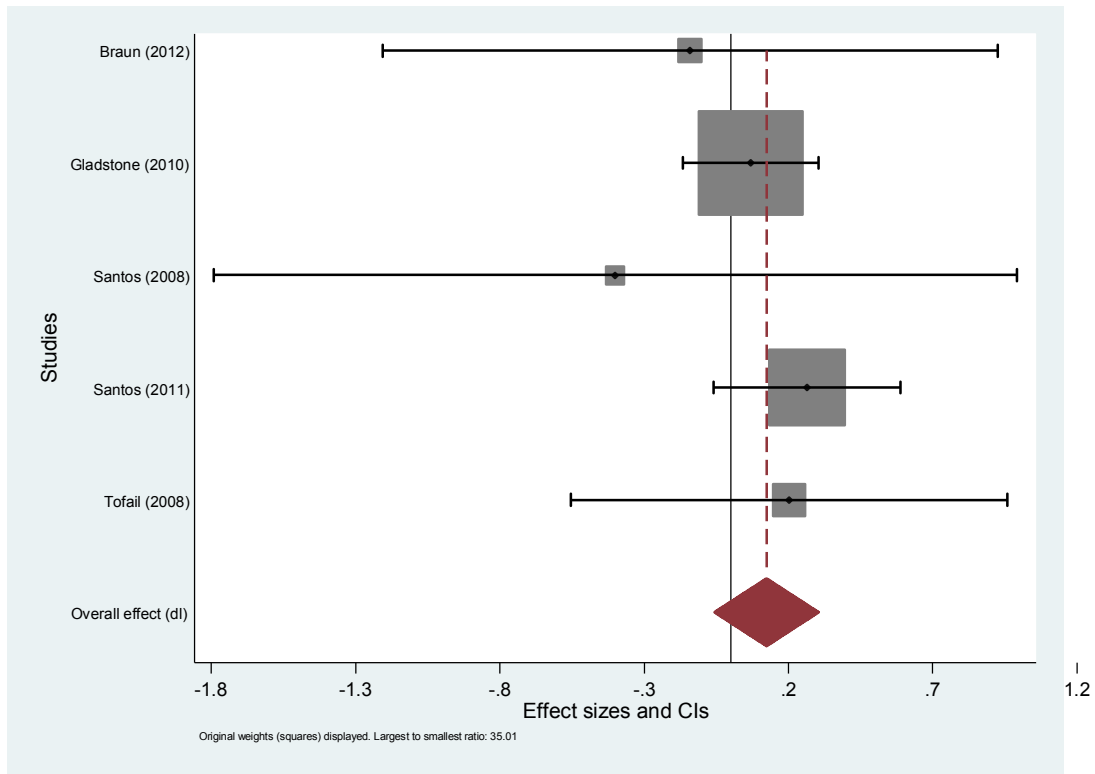

**Figure 63: Association between maternal ages < 15 (reference: ages 20-34) and motor development.**

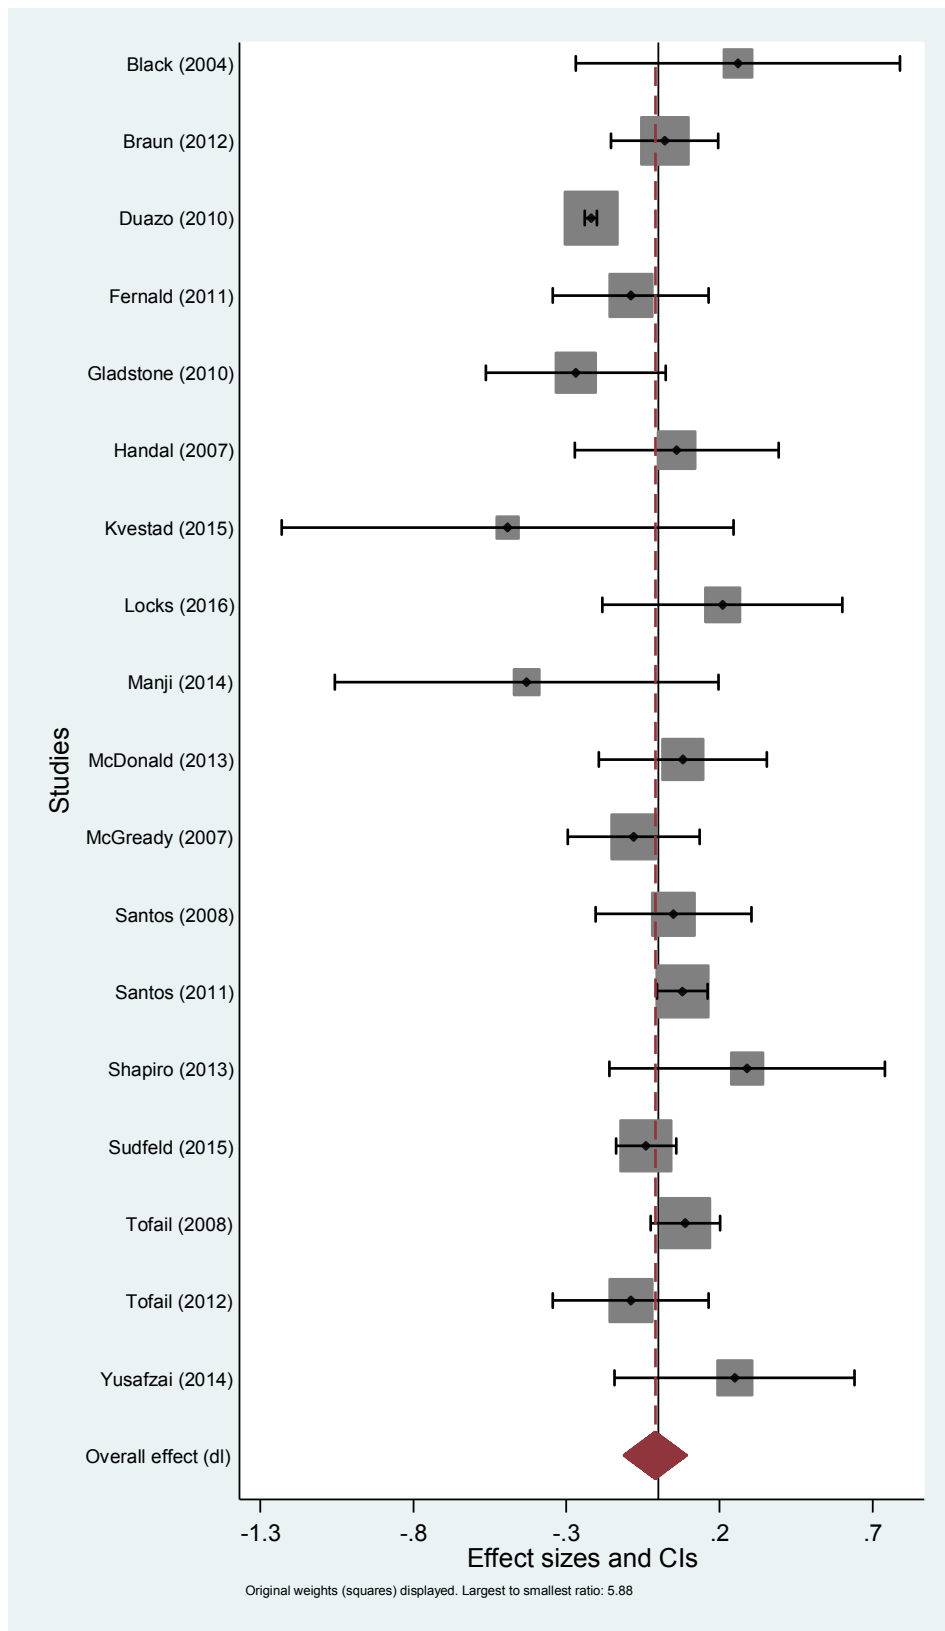

Figure 64: Association between maternal ages 15-20 (reference: ages 20-34) and motor development.

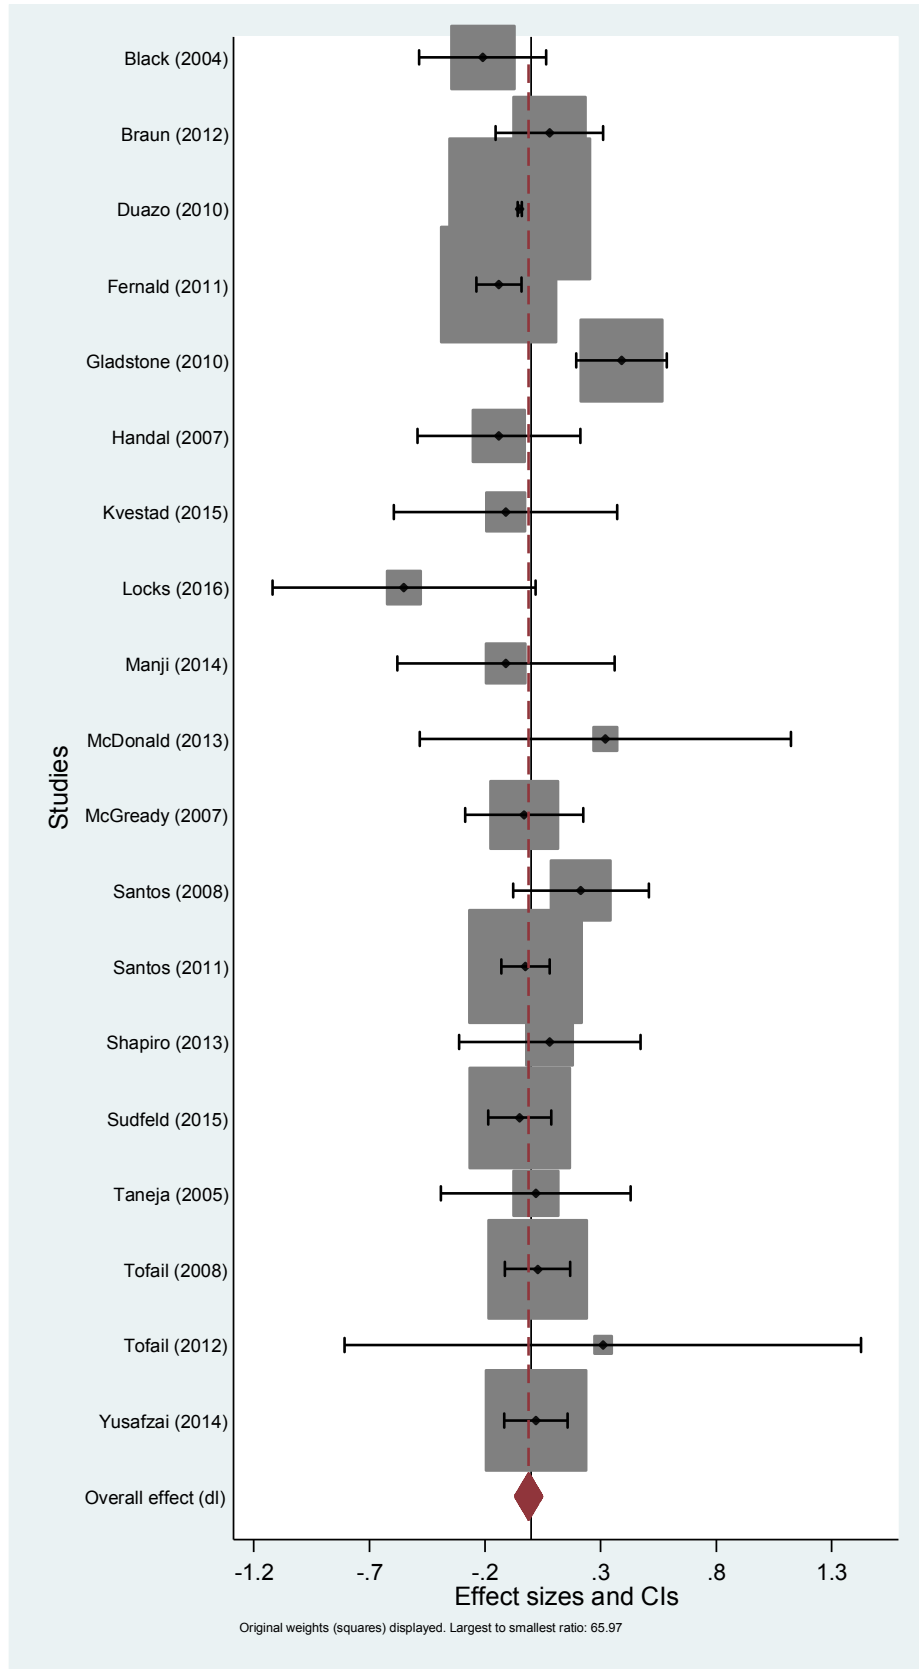

Figure 65: Association between maternal ages >35 (reference: ages 20-34) and motor development.

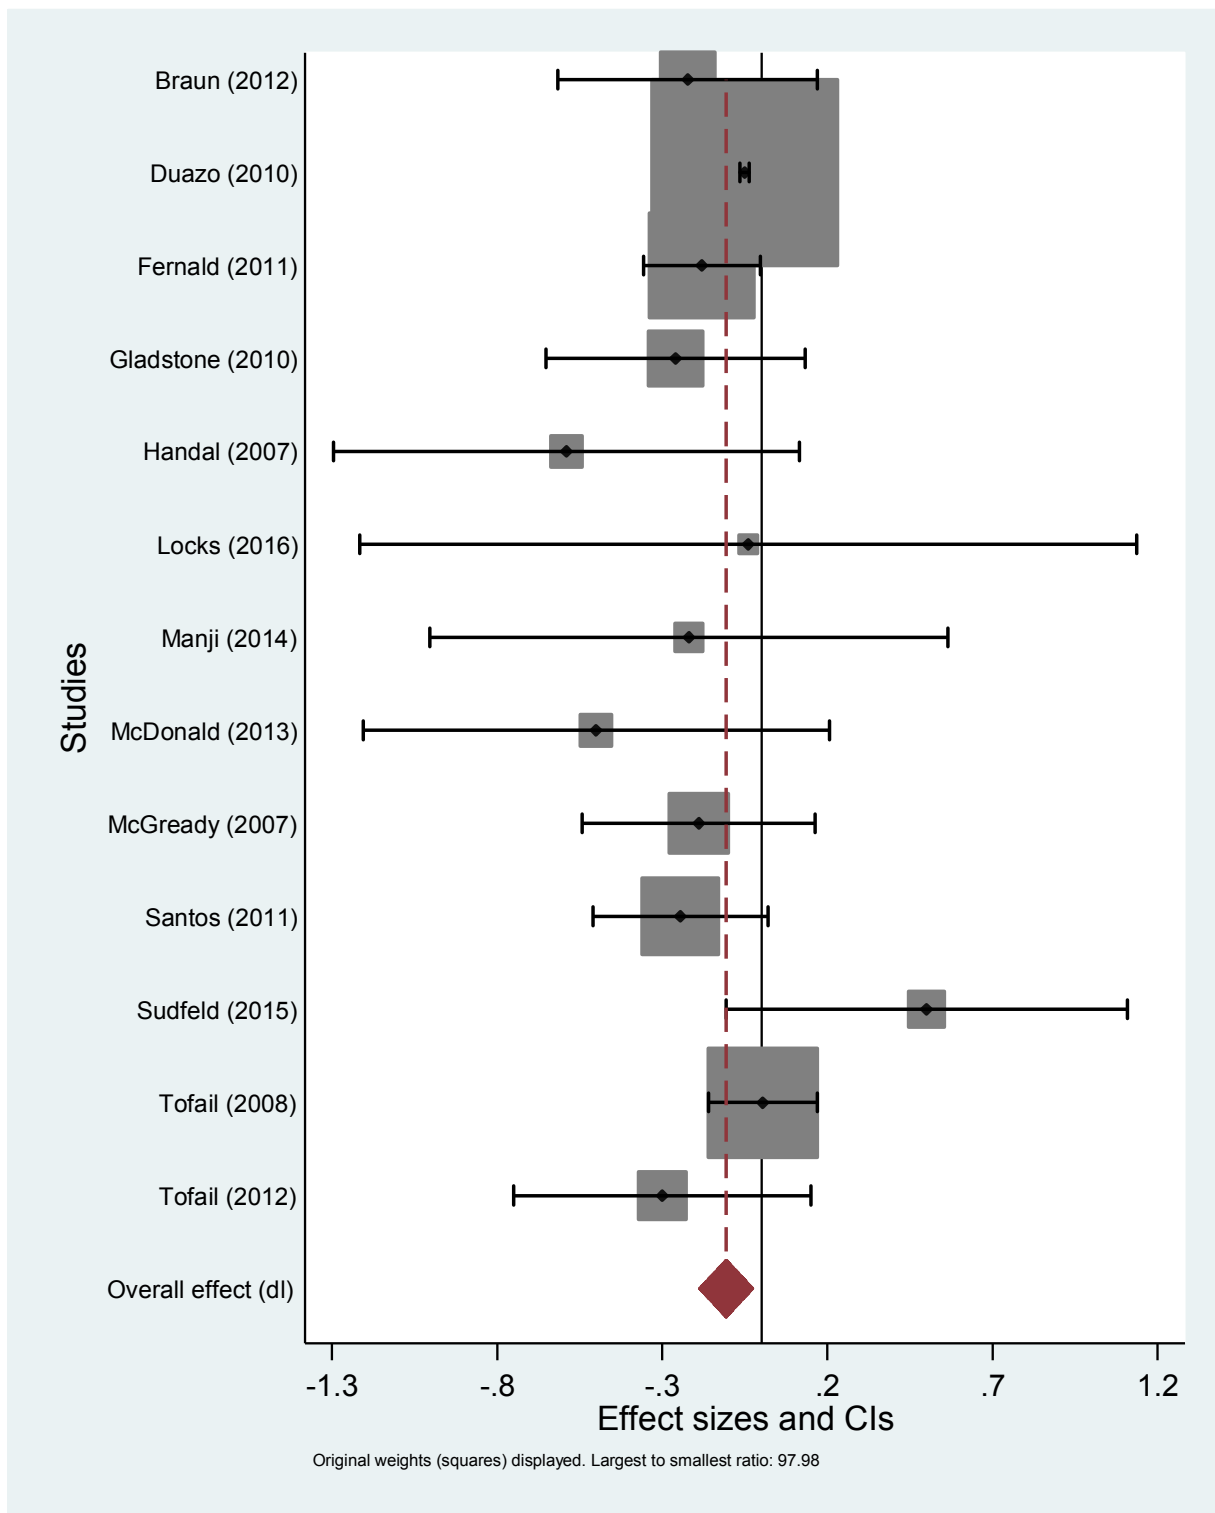

**Figure 66: Association between maternal height <145 (reference: >155 cm) and motor development.**

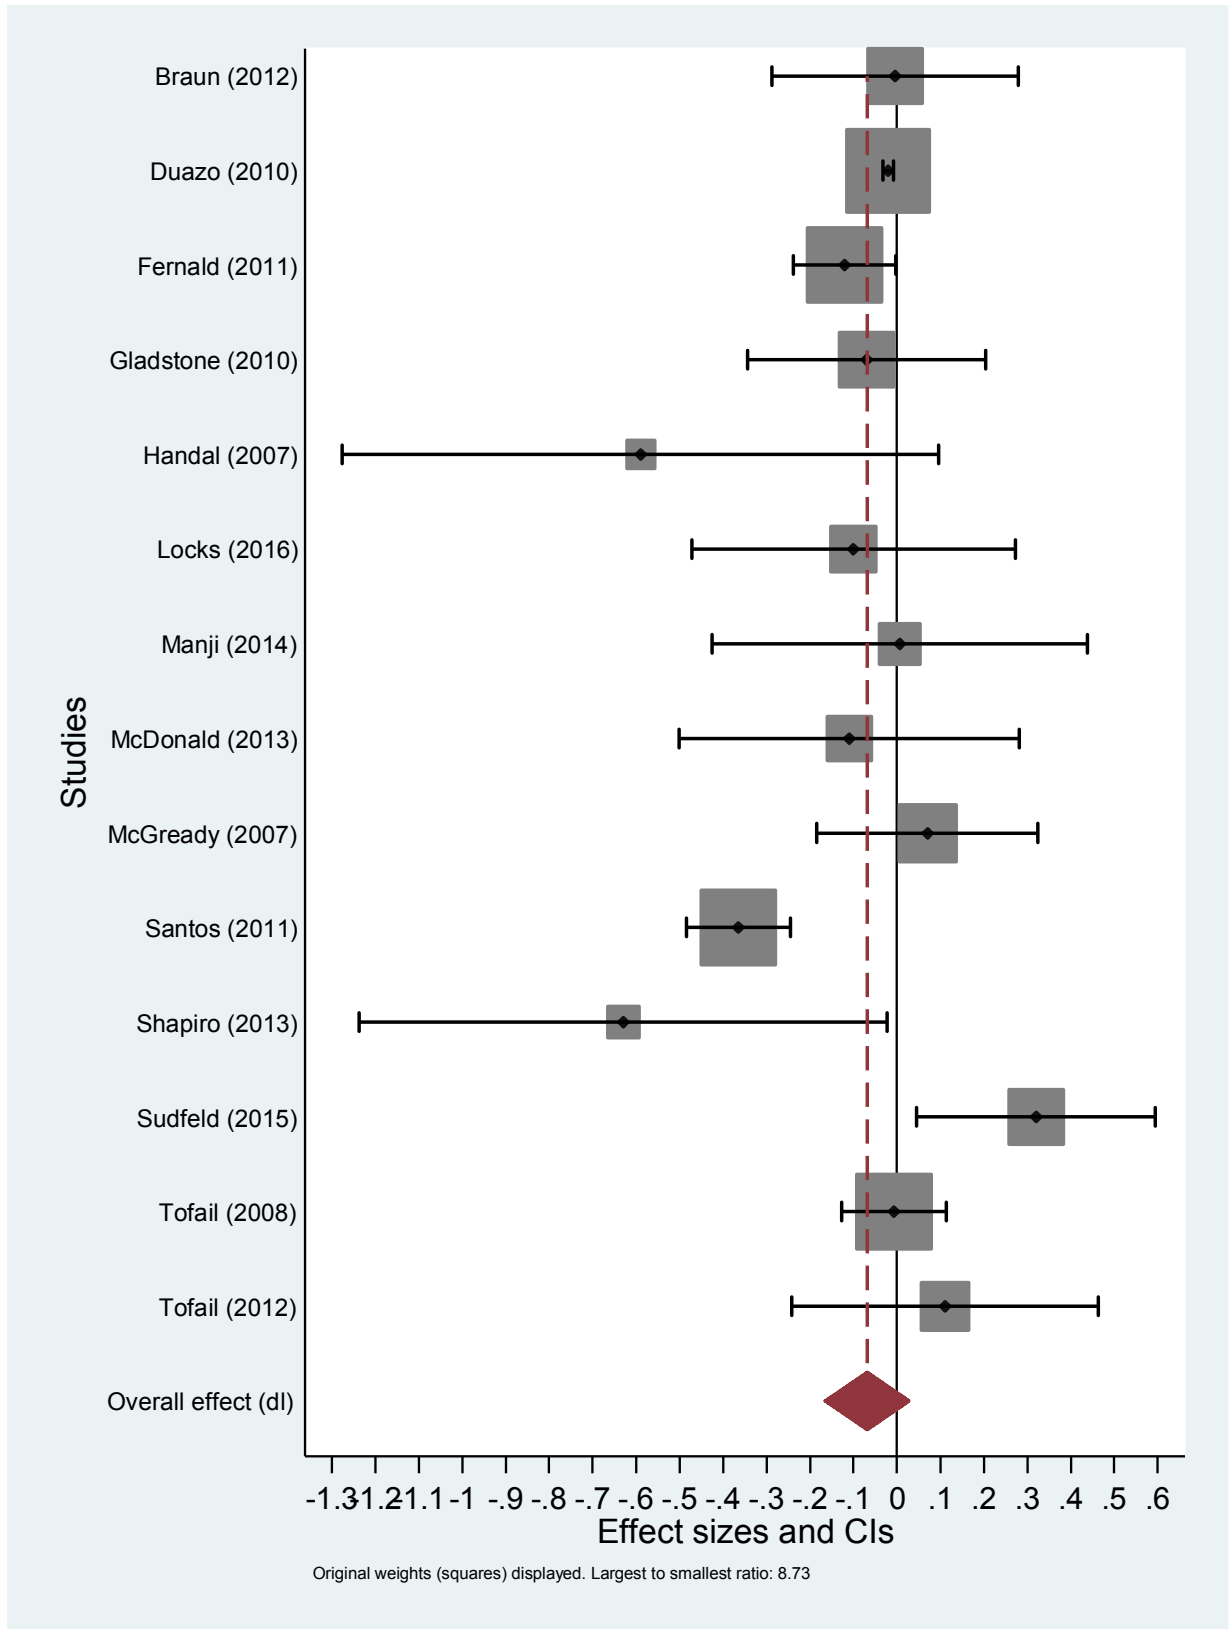

Figure 67: Association between maternal height 145-150 (reference: >155 cm) and motor development.

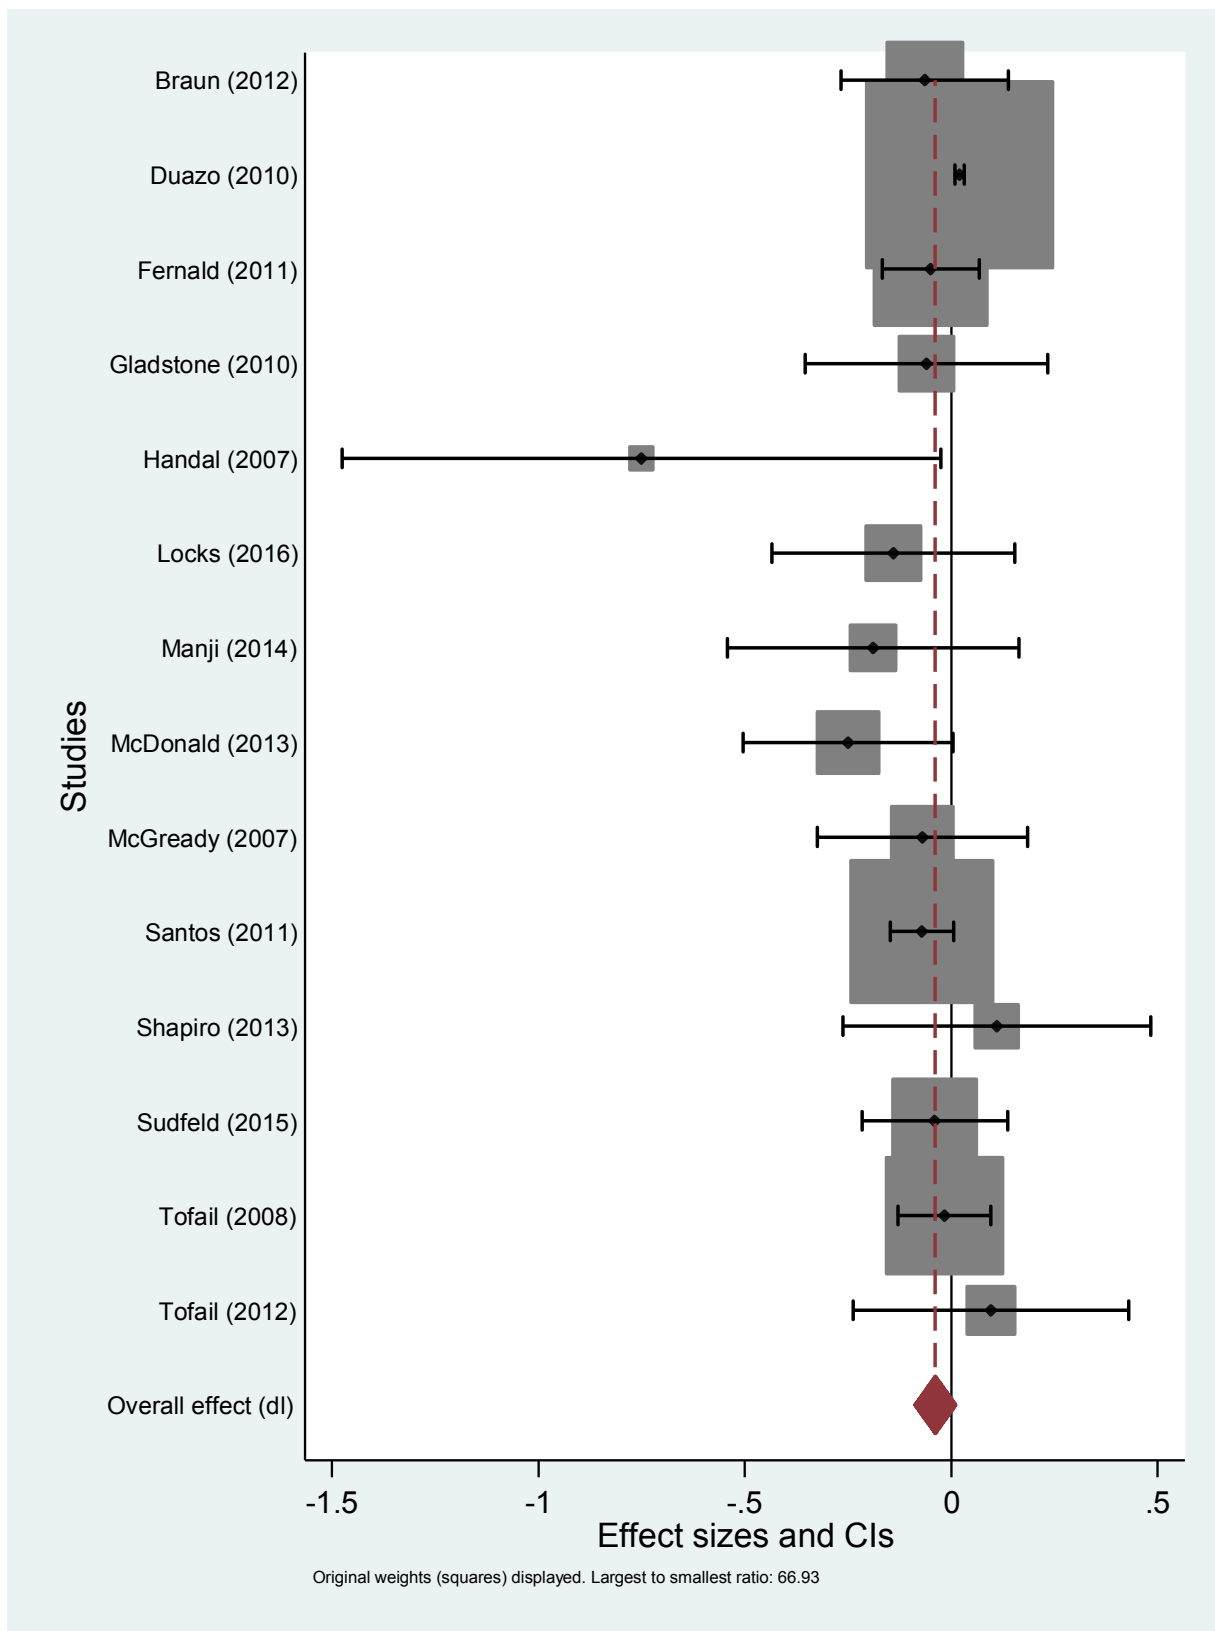

Figure 68: Association between maternal height 150-155 (reference: >155 cm) and motor development.



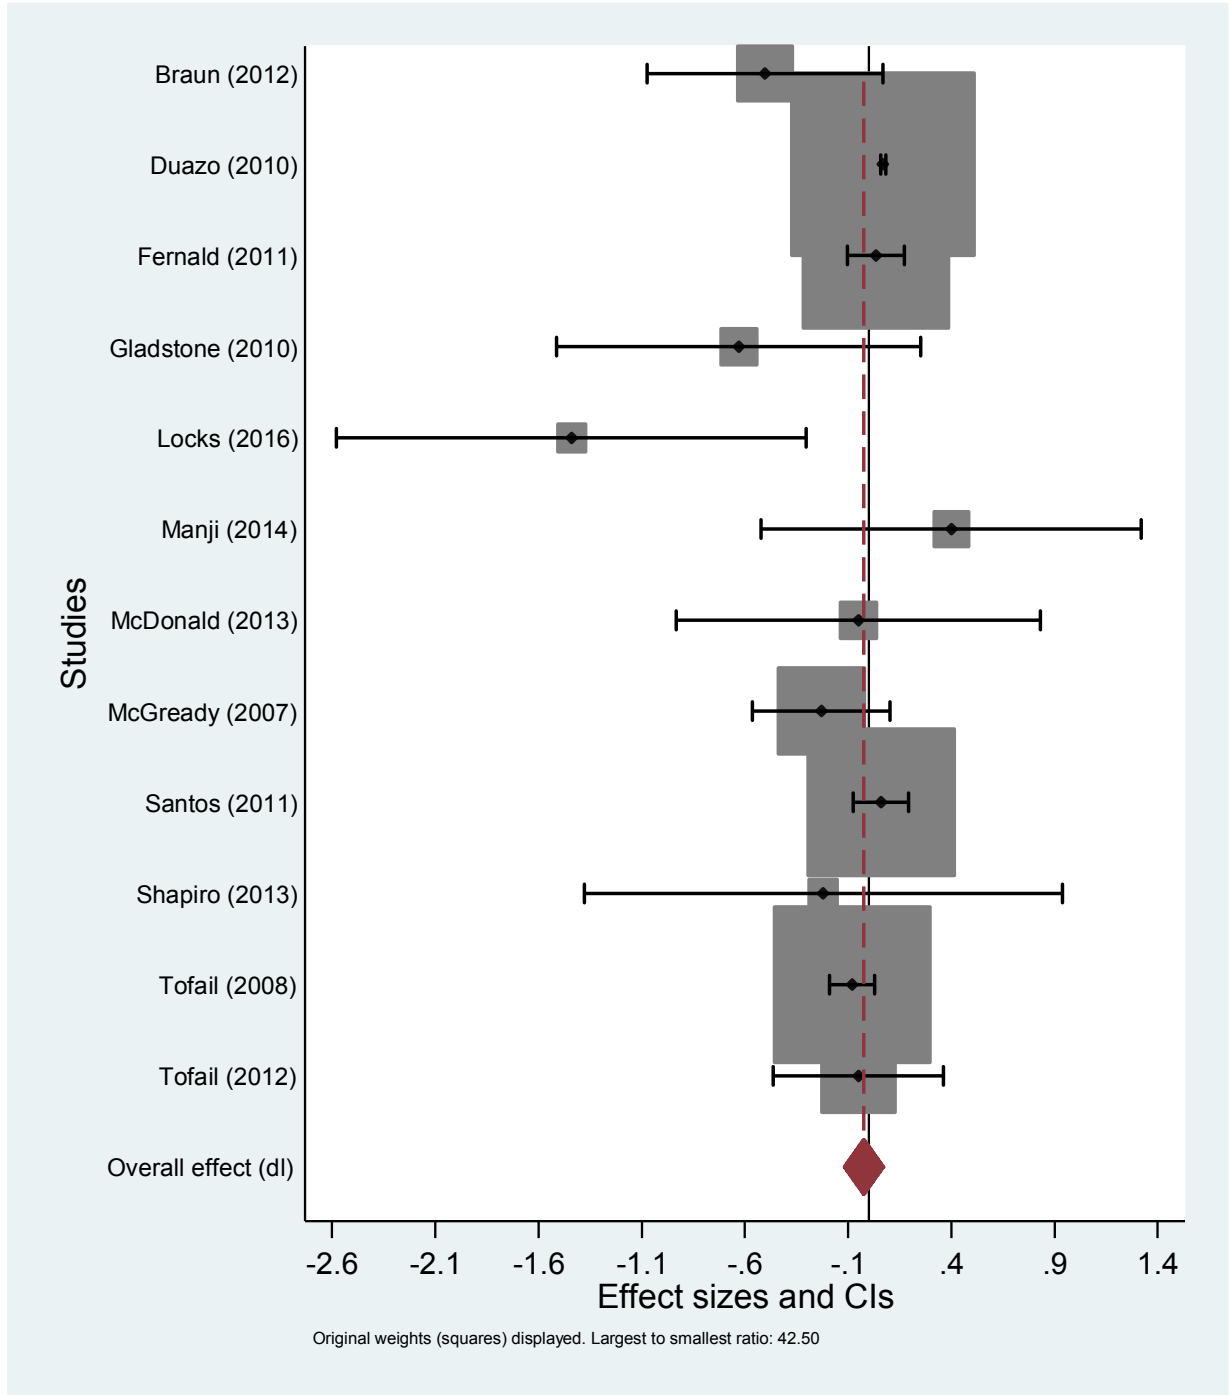

**Figure 69: Association between maternal BMI <18.5 kg/m<sup>2</sup> (reference: 18.5-25) and motor development.**

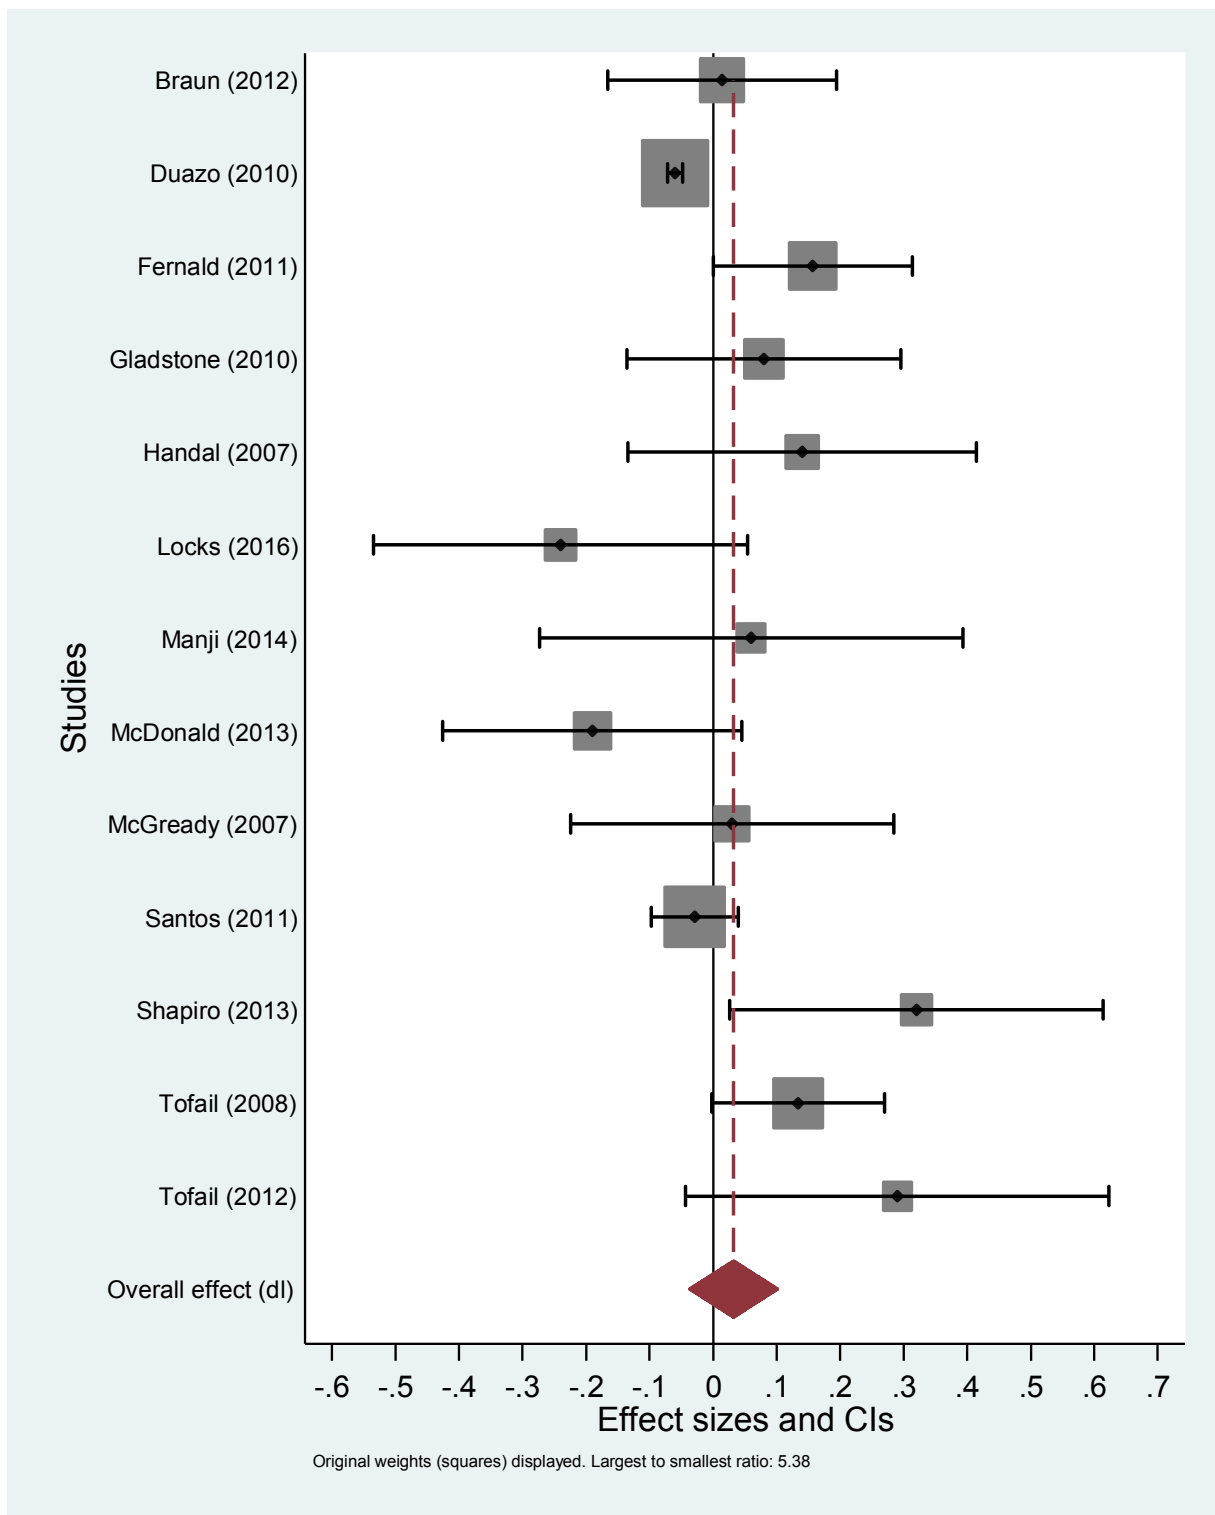

**Figure 70: Association between maternal BMI <25-30 kg/m<sup>2</sup> (reference: 18.5-25) and motor development.**

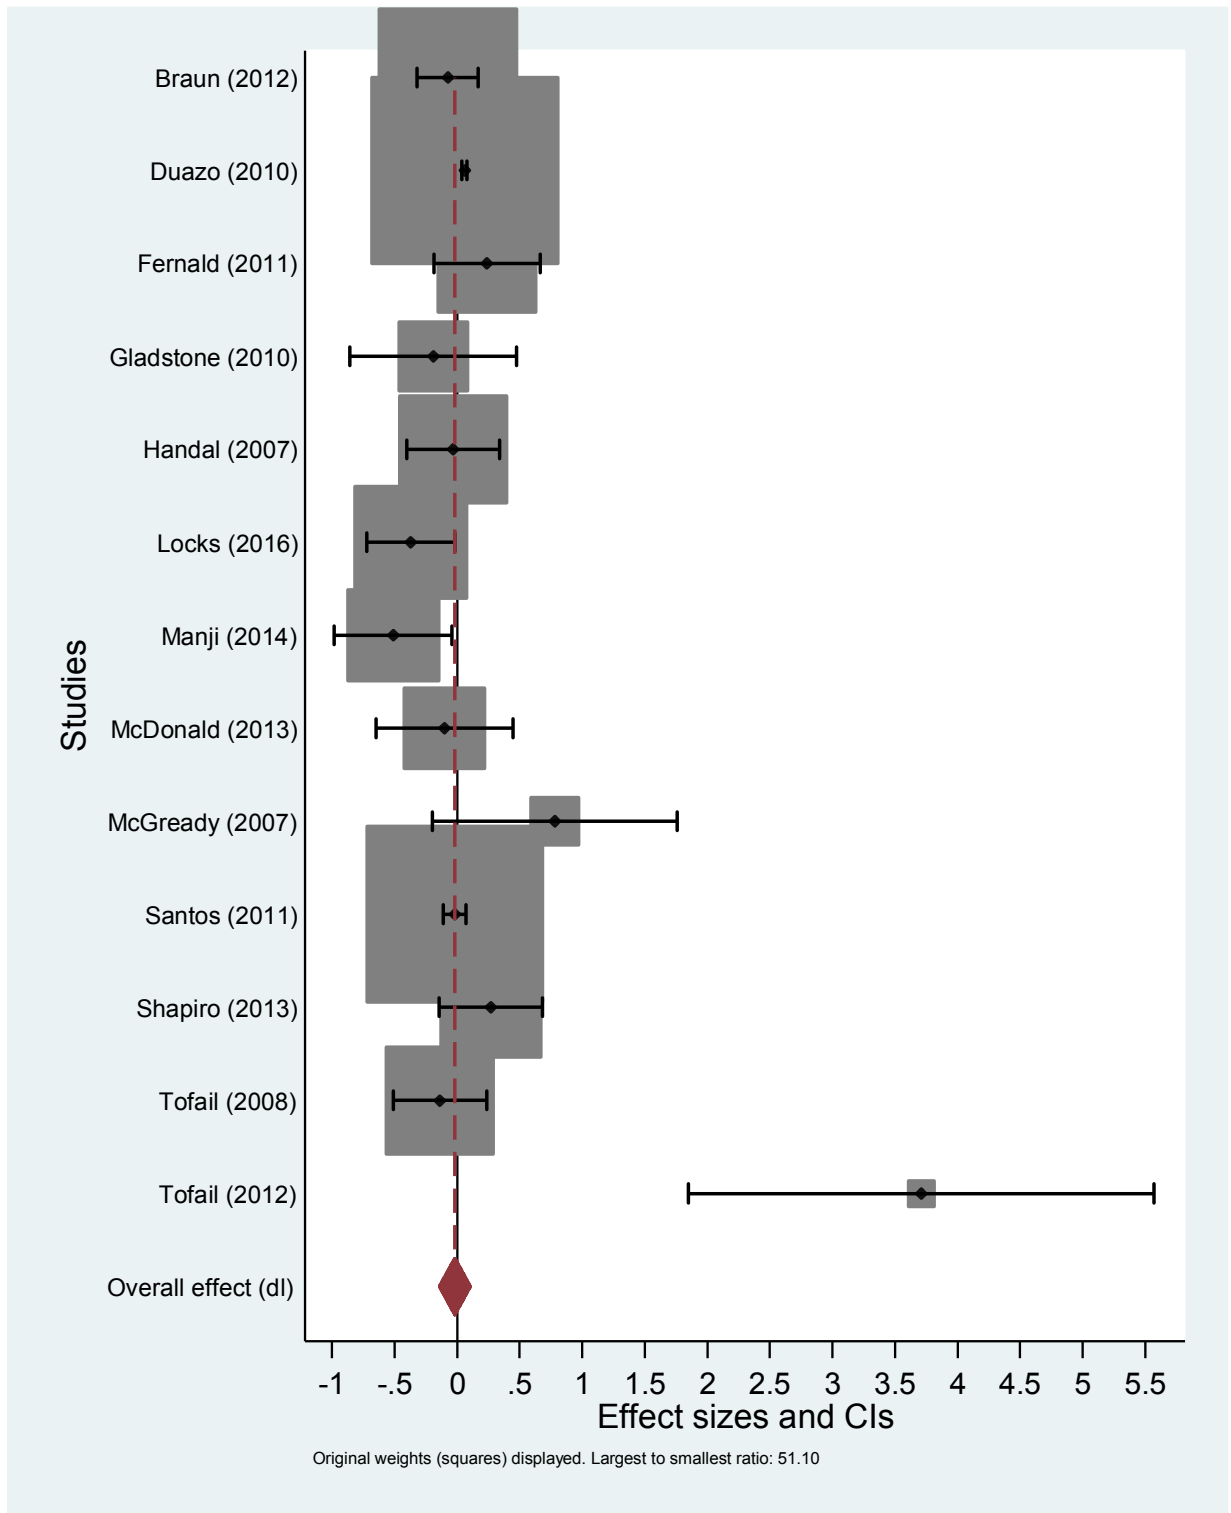

Figure 71: Association between maternal BMI >30 kg/m<sup>2</sup> (reference: 18.5-25) and motor development.

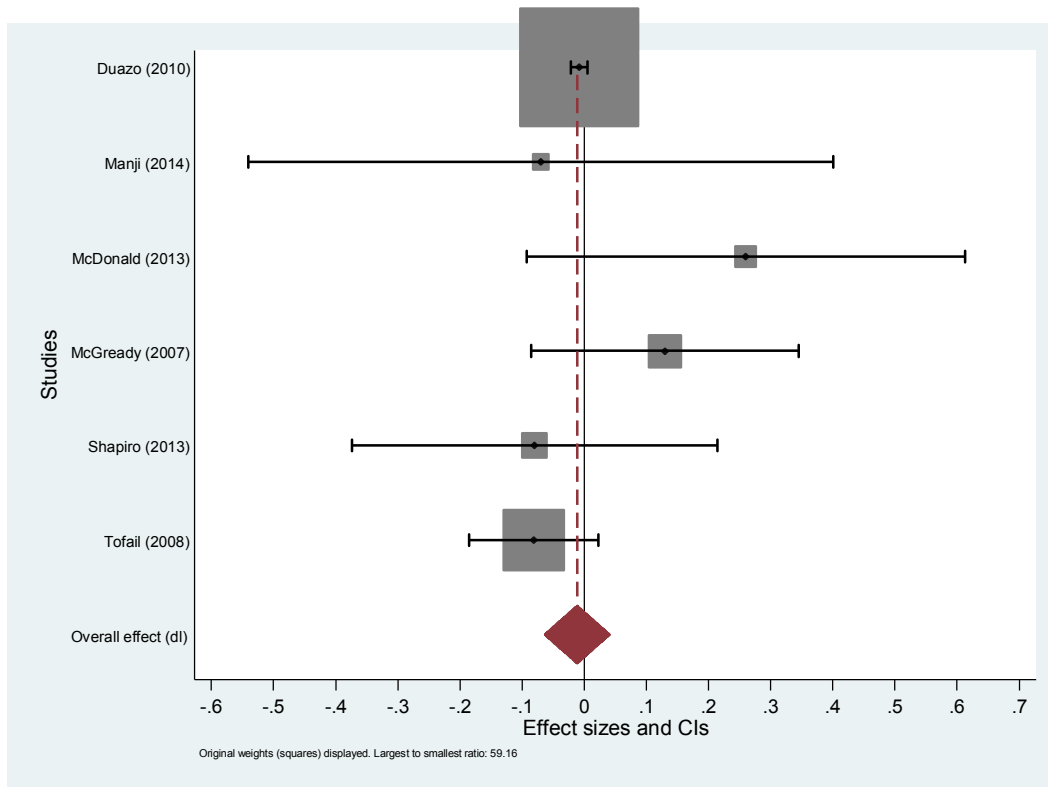

**Figure 72: Association between maternal mild anemia (reference: no anemia) and motor development.**

review only

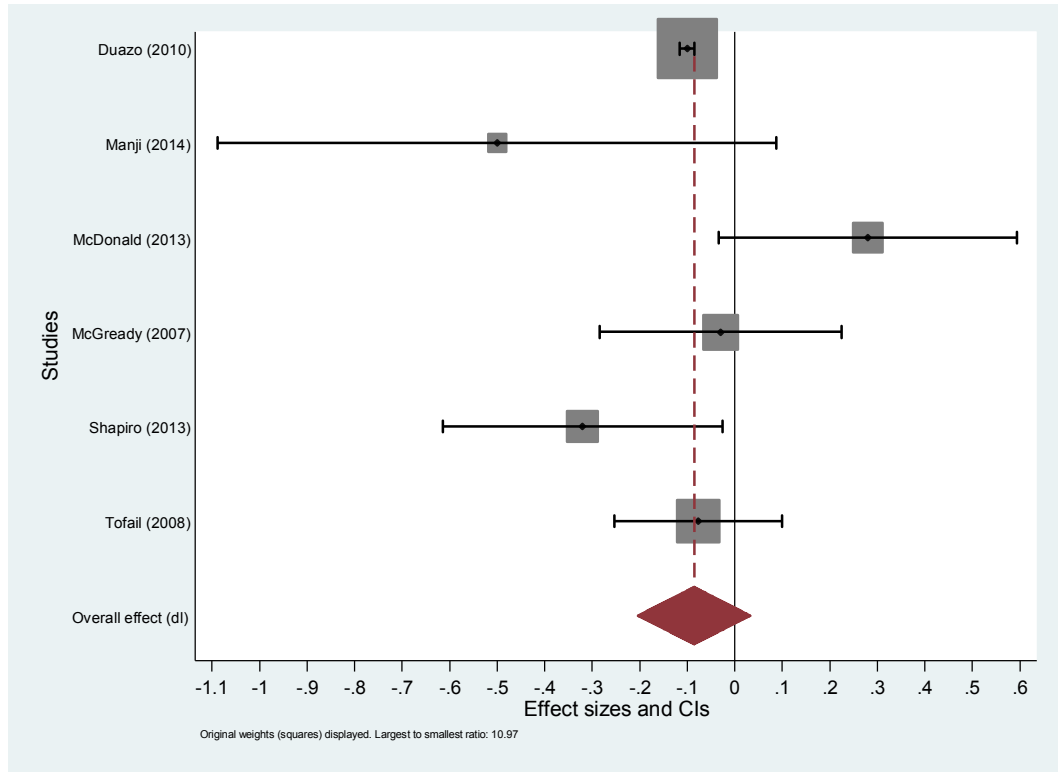

Figure 73: Association between maternal moderate anemia (reference: no anemia) and motor development.

6. Parental Risk Factors on Child's Language Development

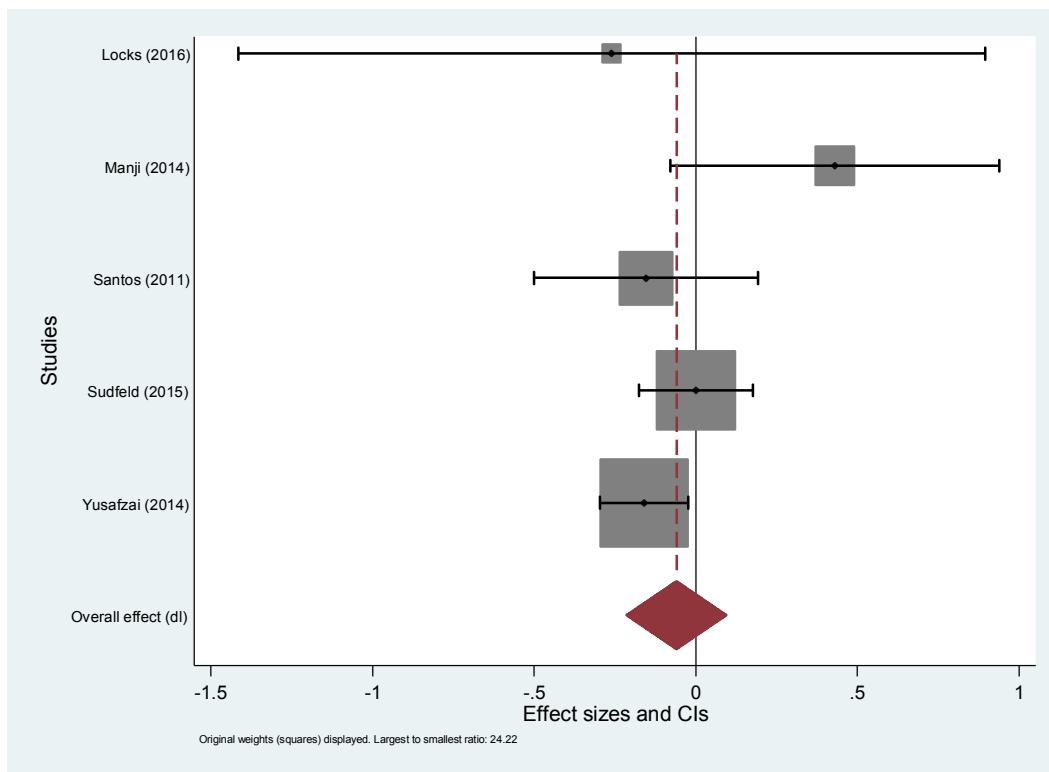

Figure 74: Association between no maternal education (reference: primary education) and language development.

1  
2  
3  
4  
5  
6  
7  
8  
9  
10  
11  
12  
13  
14  
15  
16  
17  
18  
19  
20  
21  
22  
23  
24  
25  
26  
27  
28  
29  
30  
31  
32  
33  
34  
35  
36  
37  
38  
39  
40  
41  
42  
43  
44  
45  
46  
47  
48  
49  
50  
51  
52  
53  
54  
55  
56  
57  
58  
59  
60

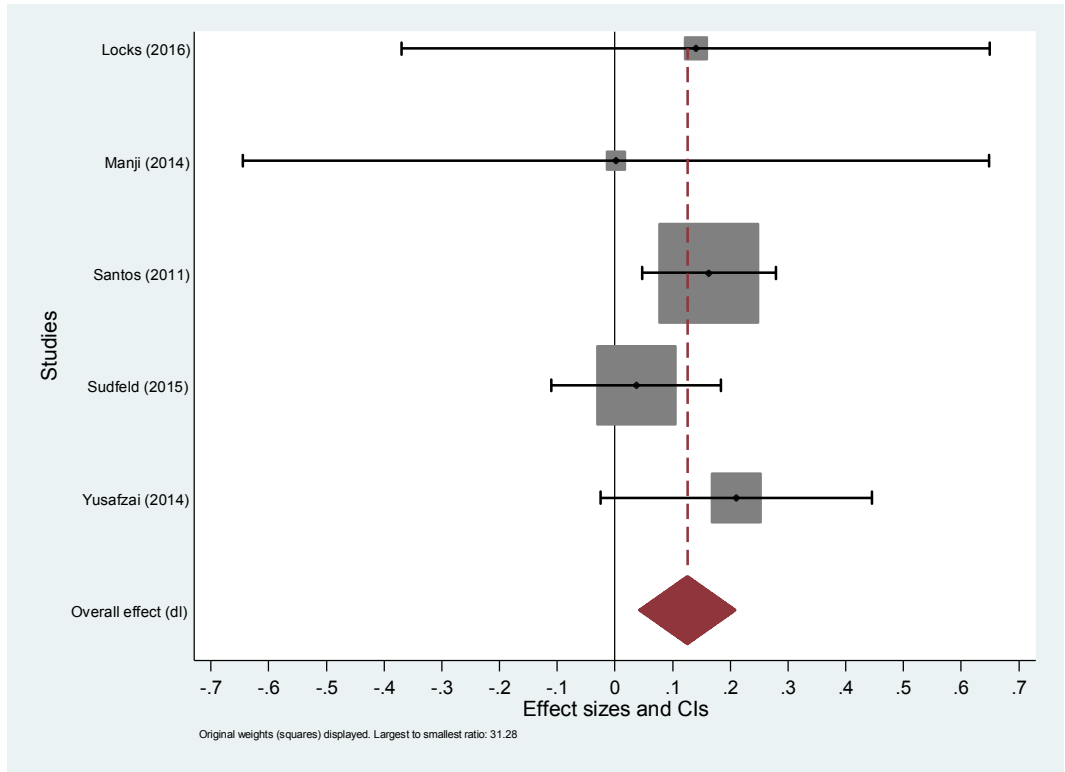

Figure 75: Association between maternal secondary education (reference: primary education) and language development.

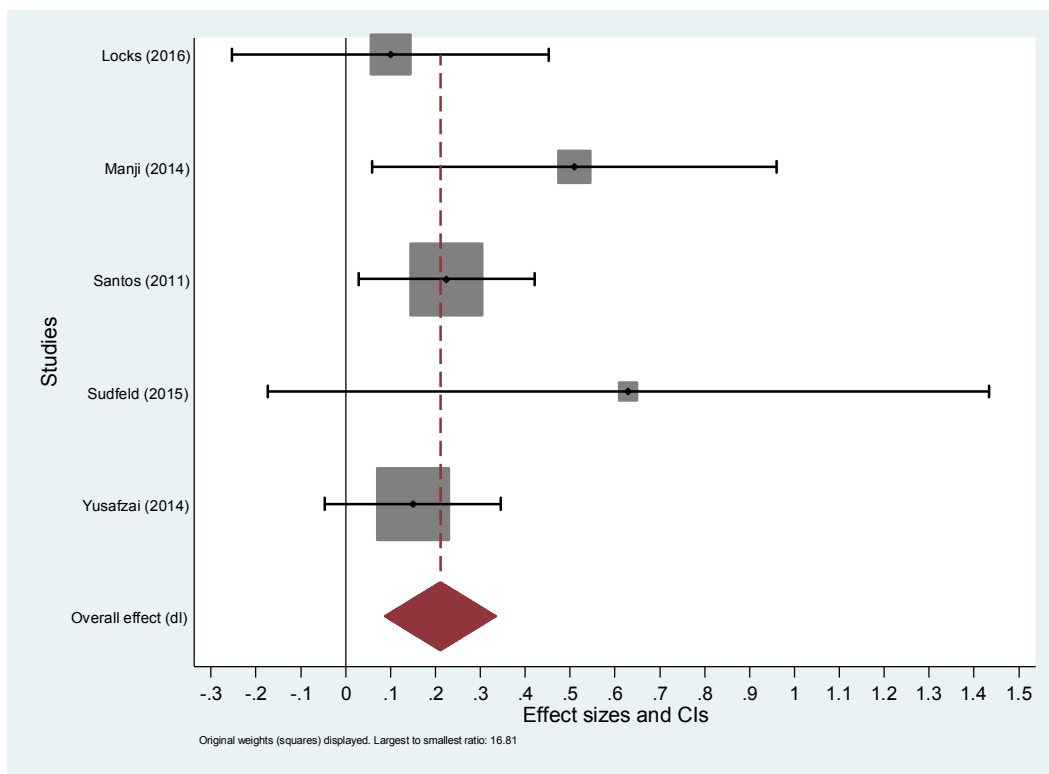

**Figure 76: Association between maternal higher education (reference: primary education) and language development.**



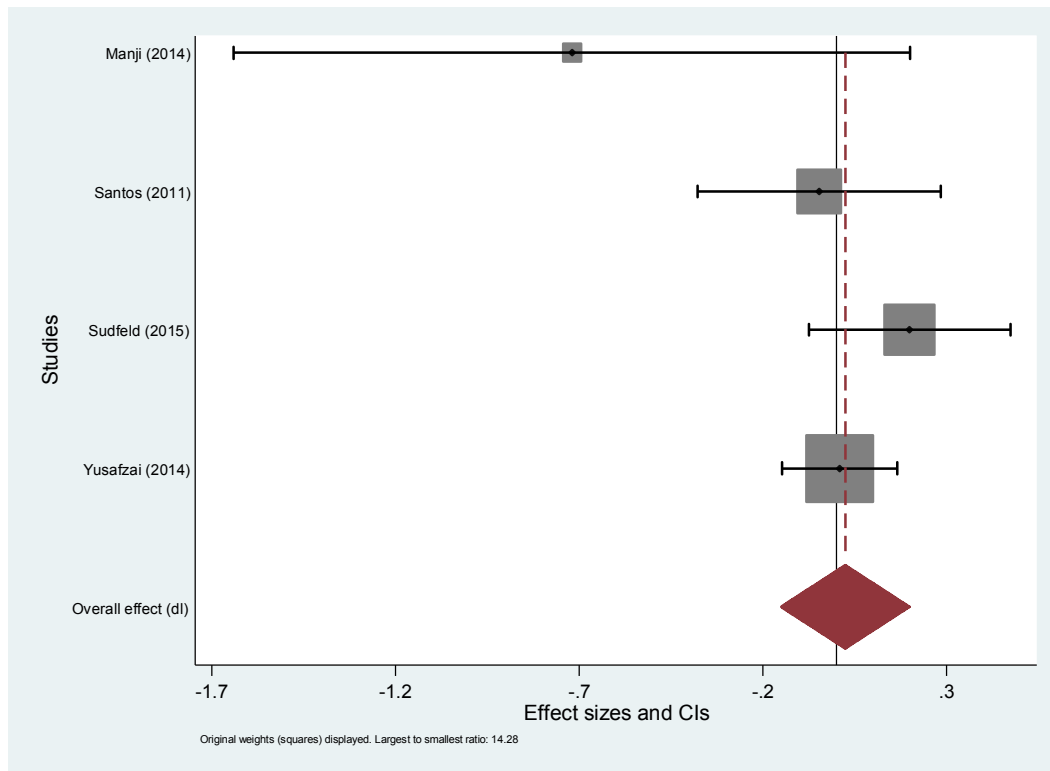

Figure 77: Association between no paternal education (reference: primary education) and language development.

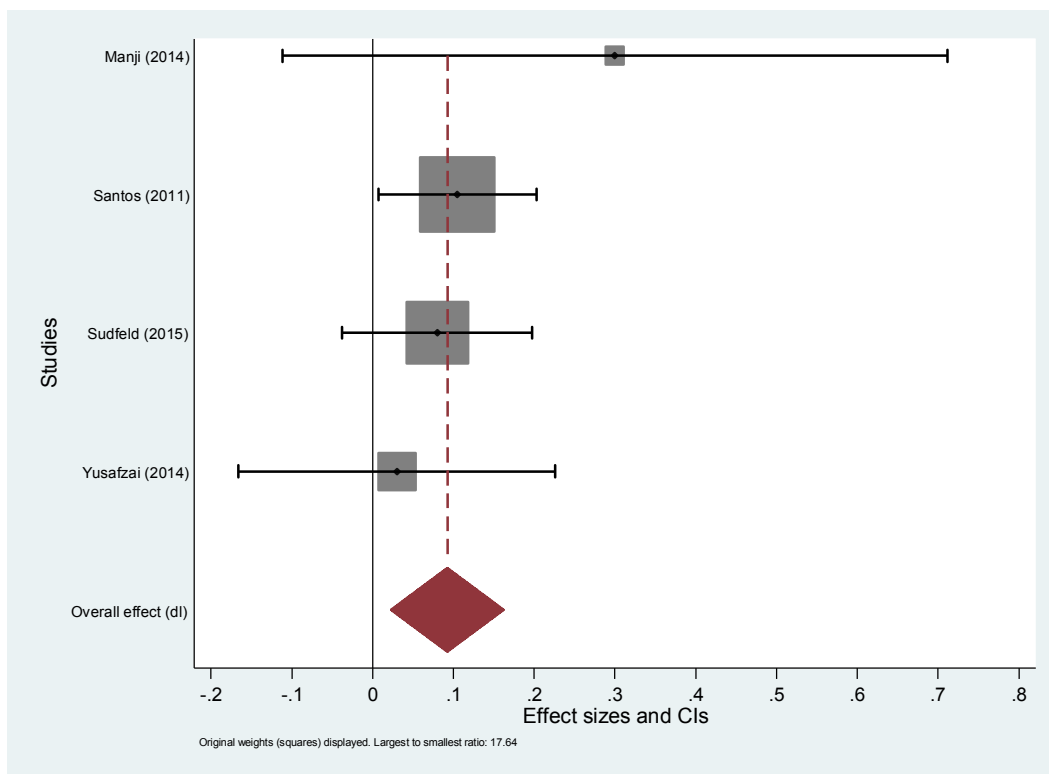

Figure 78: Association between paternal secondary education (reference: primary education) and language development.

1  
2  
3  
4  
5  
6  
7  
8  
9  
10  
11  
12  
13  
14  
15  
16  
17  
18  
19  
20  
21  
22  
23  
24  
25  
26  
27  
28  
29  
30  
31  
32  
33  
34  
35  
36  
37  
38  
39  
40  
41  
42  
43  
44  
45  
46  
47  
48  
49  
50  
51  
52  
53  
54  
55  
56  
57  
58  
59  
60

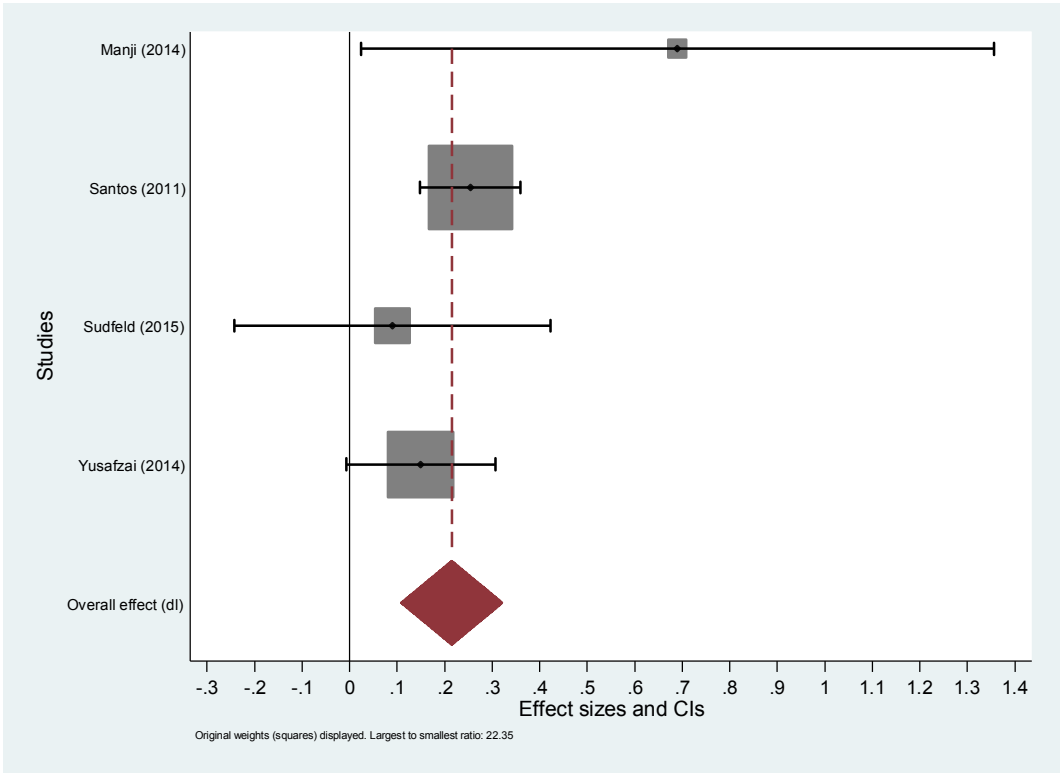

Figure 79: Association between paternal higher education (reference: primary education) and language development.

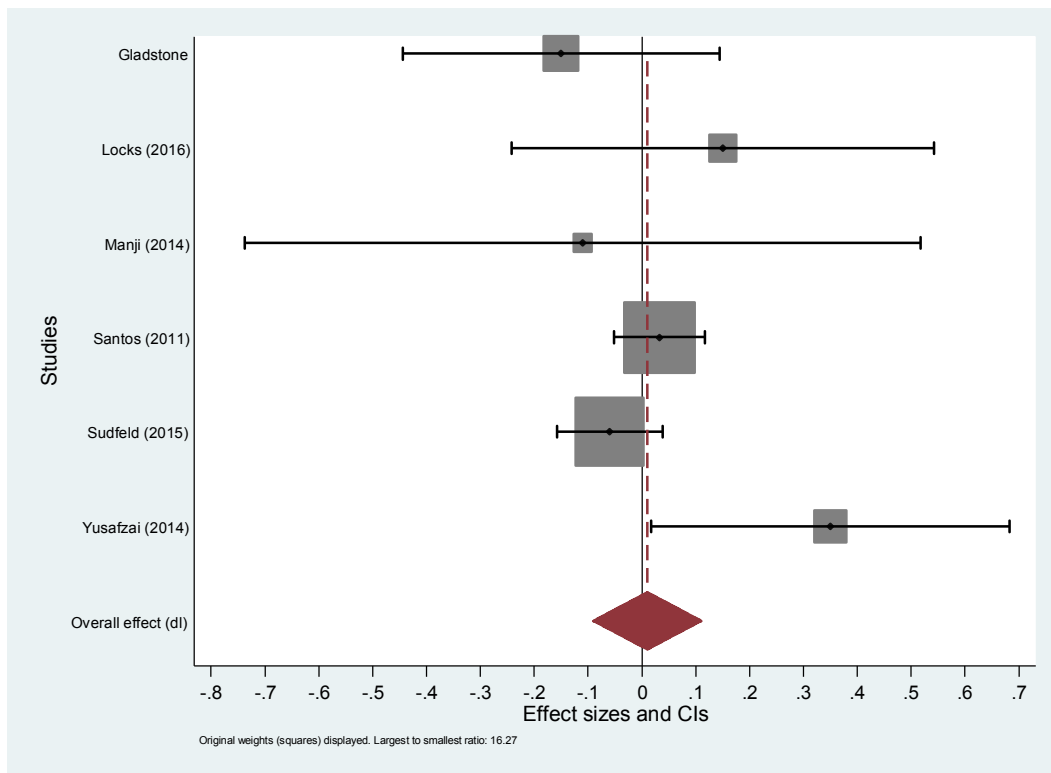

Figure 80: Association between maternal ages 15-20 (reference: ages 20-34) and language development.

1  
2  
3  
4  
5  
6  
7  
8  
9  
10  
11  
12  
13  
14  
15  
16  
17  
18  
19  
20  
21  
22  
23  
24  
25  
26  
27  
28  
29  
30  
31  
32  
33  
34  
35  
36  
37  
38  
39  
40  
41  
42  
43  
44  
45  
46  
47  
48  
49  
50  
51  
52  
53  
54  
55  
56  
57  
58  
59  
60

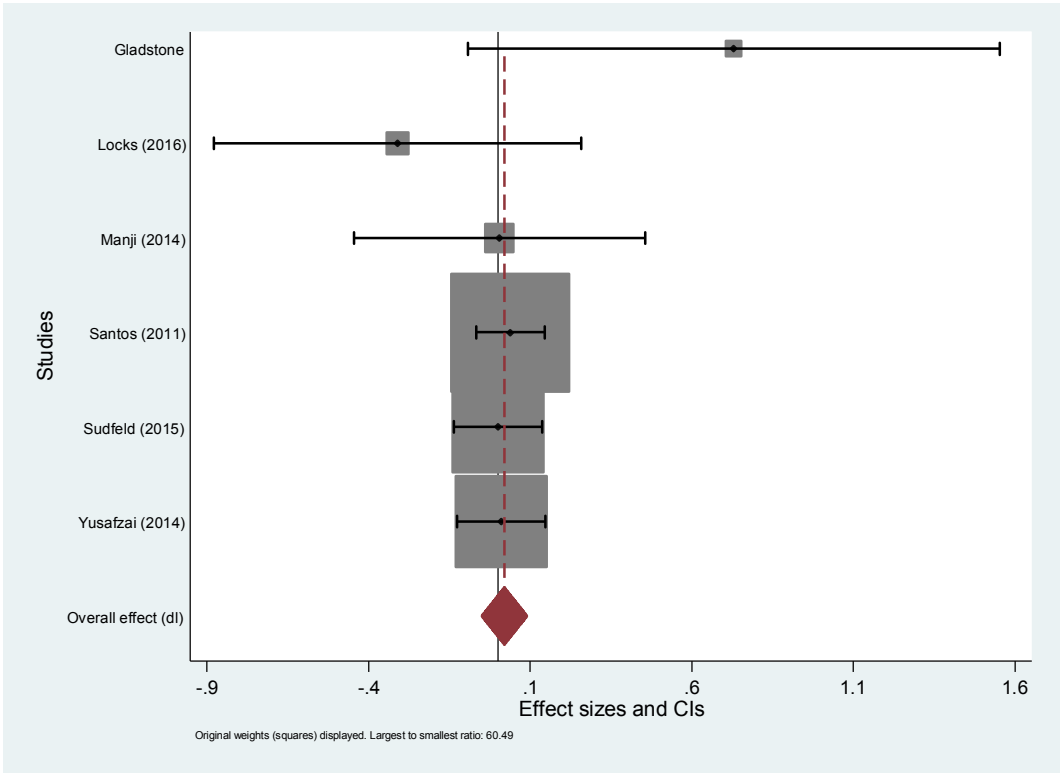

**Figure 81: Association between maternal ages >35 (reference: ages 20-34) and language development.**

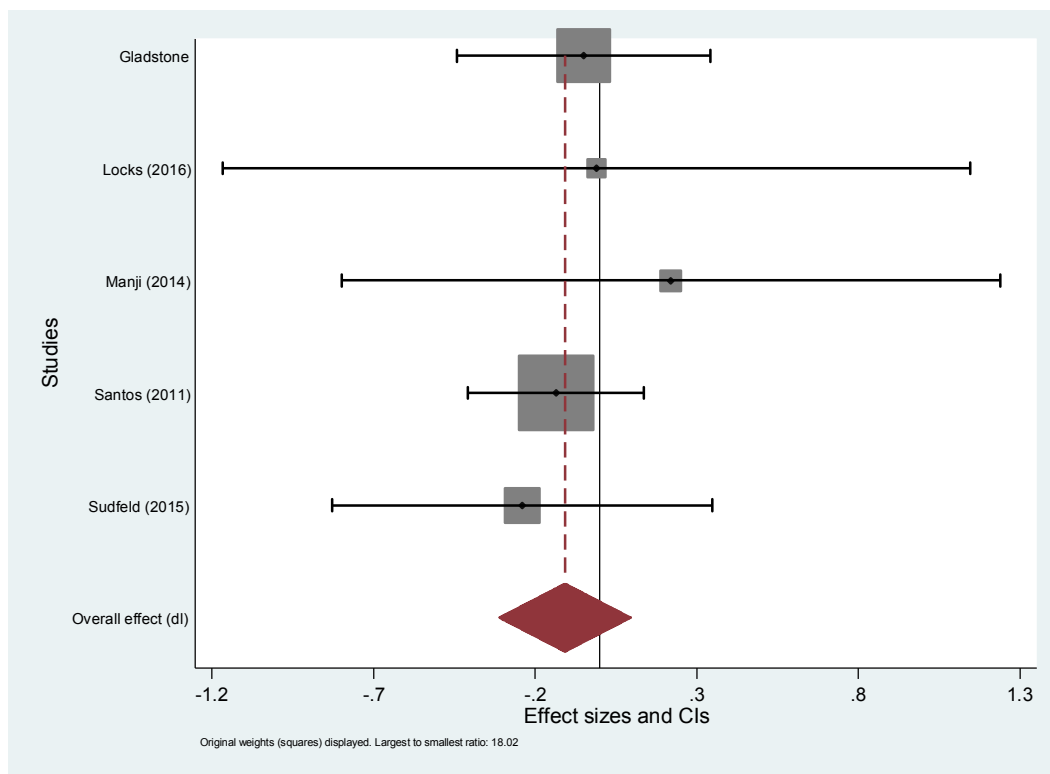

**Figure 82: Association between maternal height <145 cm (reference: >155 cm) and language development.**

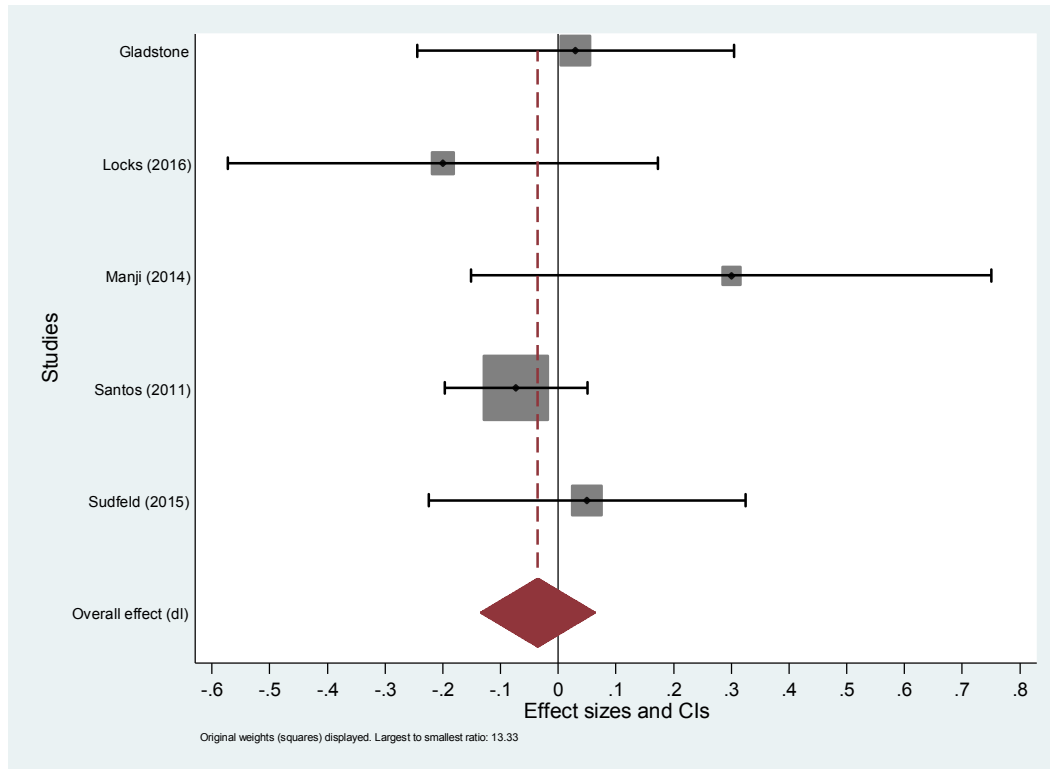

**Figure 83: Association between maternal height 145-150cm (reference: >155 cm) and language development.**

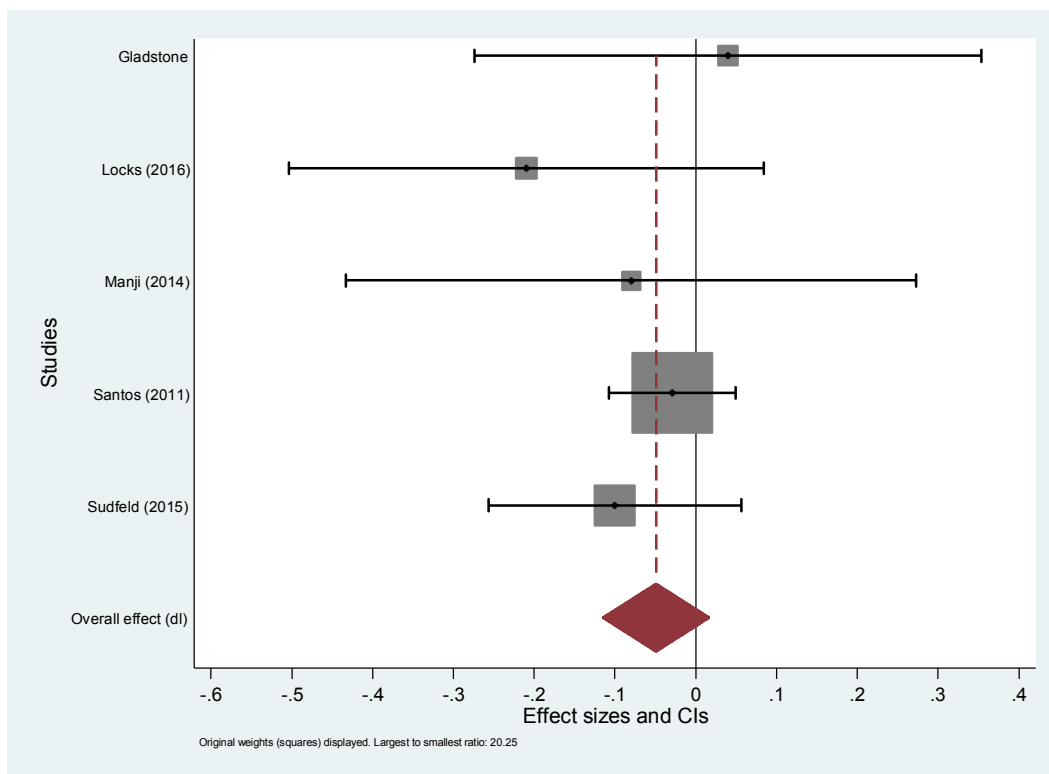

**Figure 84: Association between maternal height 150-155 cm (reference: >155 cm) and language development.**



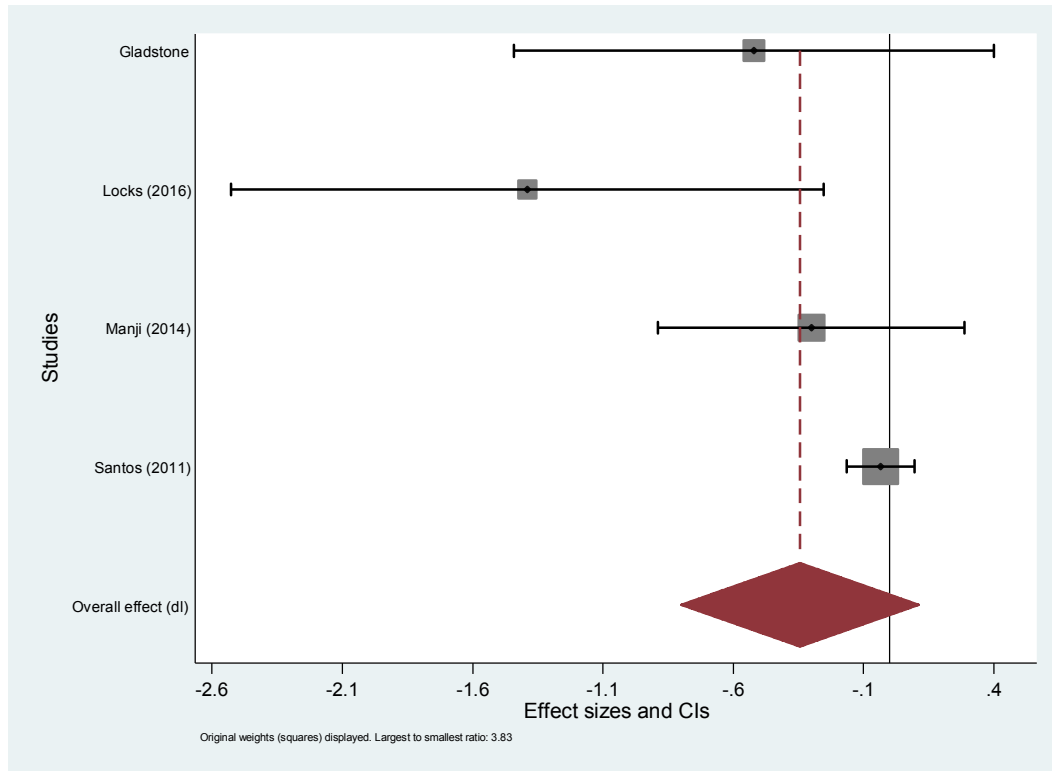

Figure 85: Association between maternal BMI 25-30 kg/m<sup>2</sup> (reference: 18.5-25) and language development.

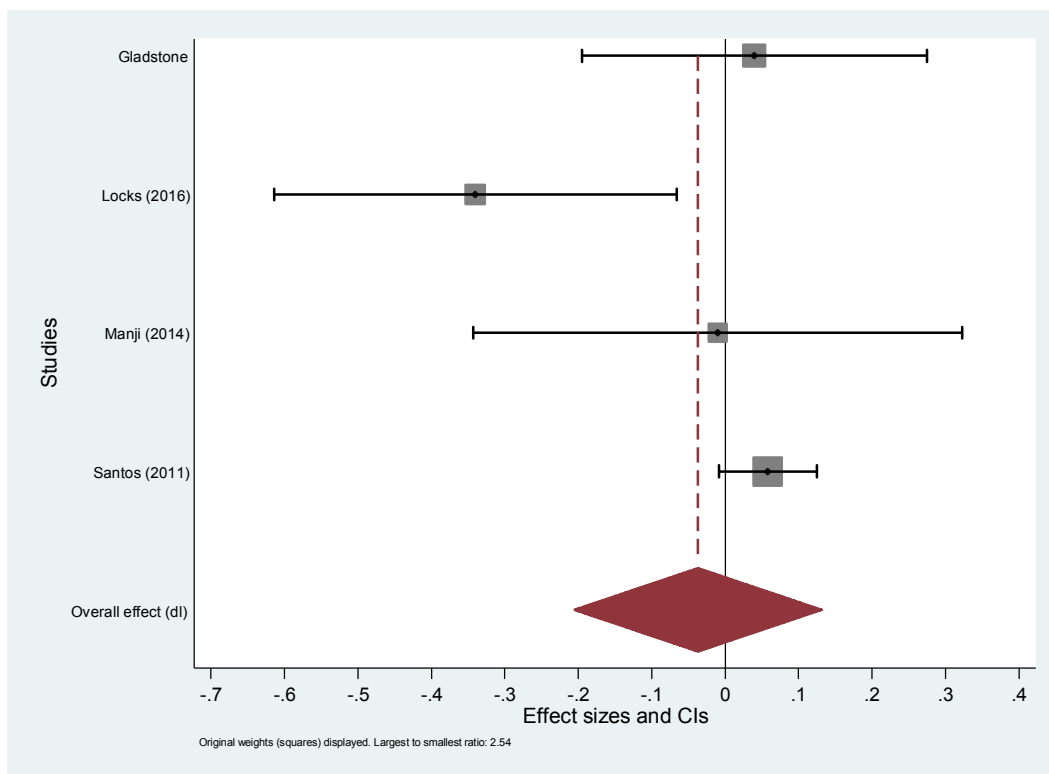

Figure 86: Association between maternal BMI >30 kg/m<sup>2</sup> (reference: 18.5-25) and language development.

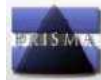

# PRISMA 2009 Checklist

| Section/topic                      | #  | Checklist item                                                                                                                                                                                                                                                                                              | Reported on page # |
|------------------------------------|----|-------------------------------------------------------------------------------------------------------------------------------------------------------------------------------------------------------------------------------------------------------------------------------------------------------------|--------------------|
| <b>TITLE</b>                       |    |                                                                                                                                                                                                                                                                                                             |                    |
| Title                              | 1  | Identify the report as a systematic review, meta-analysis, or both.                                                                                                                                                                                                                                         | No                 |
| <b>ABSTRACT</b>                    |    |                                                                                                                                                                                                                                                                                                             |                    |
| Structured summary                 | 2  | Provide a structured summary including, as applicable: background; objectives; data sources; study eligibility criteria, participants, and interventions; study appraisal and synthesis methods; results; limitations; conclusions and implications of key findings; systematic review registration number. | 5                  |
| <b>INTRODUCTION</b>                |    |                                                                                                                                                                                                                                                                                                             |                    |
| Rationale                          | 3  | Describe the rationale for the review in the context of what is already known.                                                                                                                                                                                                                              | 6                  |
| Objectives                         | 4  | Provide an explicit statement of questions being addressed with reference to participants, interventions, comparisons, outcomes, and study design (PICOS).                                                                                                                                                  | 6-7                |
| <b>METHODS</b>                     |    |                                                                                                                                                                                                                                                                                                             |                    |
| Protocol and registration          | 5  | Indicate if a review protocol exists, if and where it can be accessed (e.g., Web address), and, if available, provide registration information including registration numbers.                                                                                                                              | yes                |
| Eligibility criteria               | 6  | Specify study characteristics (e.g., PICOS, length of follow-up) and report characteristics (e.g., years considered, language, publication status) used as criteria for eligibility, giving rationale.                                                                                                      | 8                  |
| Information sources                | 7  | Describe all information sources (e.g., databases with dates of coverage, contact with study authors to identify additional studies) in the search and date last searched.                                                                                                                                  | 8                  |
| Search                             | 8  | Present full electronic search strategy for at least one database, including any limits used, such that it could be repeated.                                                                                                                                                                               | Appendix 1         |
| Study selection                    | 9  | State the process for selecting studies (i.e., screening, eligibility, included in systematic review, and, if applicable, included in the meta-analysis).                                                                                                                                                   | 8 & 10             |
| Data collection process            | 10 | Describe method of data extraction from reports (e.g., piloted forms, independently, in duplicate) and any processes for obtaining and confirming data from investigators.                                                                                                                                  | 8                  |
| Data items                         | 11 | List and define all variables for which data were sought (e.g., PICOS, funding sources) and any assumptions and simplifications made.                                                                                                                                                                       | 9                  |
| Risk of bias in individual studies | 12 | Describe methods used for assessing risk of bias of individual studies (including specification of whether this was done at the study or outcome level), and how this information is to be used in any data synthesis.                                                                                      | N/A <sup>a</sup>   |
| Summary measures                   | 13 | State the principal summary measures (e.g., risk ratio, difference in means).                                                                                                                                                                                                                               | 10                 |
| Synthesis of results               | 14 | Describe the methods of handling data and combining results of studies, if done, including measures of consistency (e.g., $I^2$ ) for each meta-analysis.                                                                                                                                                   | 10                 |

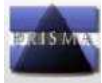

# PRISMA 2009 Checklist

Page 1 of 2

| Section/topic                 | #  | Checklist item                                                                                                                                                                                           | Reported on page # |
|-------------------------------|----|----------------------------------------------------------------------------------------------------------------------------------------------------------------------------------------------------------|--------------------|
| Risk of bias across studies   | 15 | Specify any assessment of risk of bias that may affect the cumulative evidence (e.g., publication bias, selective reporting within studies).                                                             | N/A <sup>b</sup>   |
| Additional analyses           | 16 | Describe methods of additional analyses (e.g., sensitivity or subgroup analyses, meta-regression), if done, indicating which were pre-specified.                                                         | 10                 |
| <b>RESULTS</b>                |    |                                                                                                                                                                                                          |                    |
| Study selection               | 17 | Give numbers of studies screened, assessed for eligibility, and included in the review, with reasons for exclusions at each stage, ideally with a flow diagram.                                          | Figure 1           |
| Study characteristics         | 18 | For each study, present characteristics for which data were extracted (e.g., study size, PICOS, follow-up period) and provide the citations.                                                             | Table 1            |
| Risk of bias within studies   | 19 | Present data on risk of bias of each study and, if available, any outcome level assessment (see item 12).                                                                                                | N/A <sup>b</sup>   |
| Results of individual studies | 20 | For all outcomes considered (benefits or harms), present, for each study: (a) simple summary data for each intervention group (b) effect estimates and confidence intervals, ideally with a forest plot. | Appendix 2         |
| Synthesis of results          | 21 | Present results of each meta-analysis done, including confidence intervals and measures of consistency.                                                                                                  | Tables 2 and 3     |
| Risk of bias across studies   | 22 | Present results of any assessment of risk of bias across studies (see Item 15).                                                                                                                          | N/A <sup>b</sup>   |
| Additional analysis           | 23 | Give results of additional analyses, if done (e.g., sensitivity or subgroup analyses, meta-regression [see Item 16]).                                                                                    | 11-13              |
| <b>DISCUSSION</b>             |    |                                                                                                                                                                                                          |                    |
| Summary of evidence           | 24 | Summarize the main findings including the strength of evidence for each main outcome; consider their relevance to key groups (e.g., healthcare providers, users, and policy makers).                     | 14-17              |
| Limitations                   | 25 | Discuss limitations at study and outcome level (e.g., risk of bias), and at review-level (e.g., incomplete retrieval of identified research, reporting bias).                                            | 18                 |
| Conclusions                   | 26 | Provide a general interpretation of the results in the context of other evidence, and implications for future research.                                                                                  | 18 & 19            |
| <b>FUNDING</b>                |    |                                                                                                                                                                                                          |                    |
| Funding                       | 27 | Describe sources of funding for the systematic review and other support (e.g., supply of data); role of funders for the systematic review.                                                               | 3                  |

- a. Same analyses were conducted in all individual studies by the authors and then estimates from individual studies were combined in pooled estimates. Therefore, assessment of quality of individual studies were not done.
- b. Selection of studies were not based on published literature only, a large number of the studies were unpublished

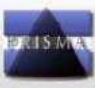

# PRISMA 2009 Checklist

1  
2  
3  
4  
5  
6  
7  
8  
9  
10  
11  
12  
13  
14  
15  
16  
17  
18  
19  
20  
21  
22  
23  
24  
25  
26  
27  
28  
29  
30  
31  
32  
33  
34  
35  
36  
37  
38  
39  
40  
41  
42  
43  
44  
45  
46  
47

*From:* Moher D, Liberati A, Tetzlaff J, Altman DG, The PRISMA Group (2009). Preferred Reporting Items for Systematic Reviews and Meta-Analyses: The PRISMA Statement. PLoS Med 6(7): e1000097. doi:10.1371/journal.pmed1000097

For more information, visit: [www.prisma-statement.org](http://www.prisma-statement.org).

Page 2 of 2

For peer review only

# BMJ Open

## Early life risk factors of motor, cognitive, and language development: a pooled analysis of studies from low-and middle-income countries

|                               |                                                                                                                                                                                                                                                                                                                                                                                                                                                                                                                                                                                                                                                                                                                                                                                                                                                                                                                                                                                                                                                                                                                                                                                                                                                                                                                                                                                                                                                                                                                                                                                                                                                                                                                                                                                                                                                                                                                                                                                                                                                                                                                                                                                                                                                                                                           |
|-------------------------------|-----------------------------------------------------------------------------------------------------------------------------------------------------------------------------------------------------------------------------------------------------------------------------------------------------------------------------------------------------------------------------------------------------------------------------------------------------------------------------------------------------------------------------------------------------------------------------------------------------------------------------------------------------------------------------------------------------------------------------------------------------------------------------------------------------------------------------------------------------------------------------------------------------------------------------------------------------------------------------------------------------------------------------------------------------------------------------------------------------------------------------------------------------------------------------------------------------------------------------------------------------------------------------------------------------------------------------------------------------------------------------------------------------------------------------------------------------------------------------------------------------------------------------------------------------------------------------------------------------------------------------------------------------------------------------------------------------------------------------------------------------------------------------------------------------------------------------------------------------------------------------------------------------------------------------------------------------------------------------------------------------------------------------------------------------------------------------------------------------------------------------------------------------------------------------------------------------------------------------------------------------------------------------------------------------------|
| Journal:                      | <i>BMJ Open</i>                                                                                                                                                                                                                                                                                                                                                                                                                                                                                                                                                                                                                                                                                                                                                                                                                                                                                                                                                                                                                                                                                                                                                                                                                                                                                                                                                                                                                                                                                                                                                                                                                                                                                                                                                                                                                                                                                                                                                                                                                                                                                                                                                                                                                                                                                           |
| Manuscript ID                 | bmjopen-2018-026449.R1                                                                                                                                                                                                                                                                                                                                                                                                                                                                                                                                                                                                                                                                                                                                                                                                                                                                                                                                                                                                                                                                                                                                                                                                                                                                                                                                                                                                                                                                                                                                                                                                                                                                                                                                                                                                                                                                                                                                                                                                                                                                                                                                                                                                                                                                                    |
| Article Type:                 | Research                                                                                                                                                                                                                                                                                                                                                                                                                                                                                                                                                                                                                                                                                                                                                                                                                                                                                                                                                                                                                                                                                                                                                                                                                                                                                                                                                                                                                                                                                                                                                                                                                                                                                                                                                                                                                                                                                                                                                                                                                                                                                                                                                                                                                                                                                                  |
| Date Submitted by the Author: | 21-Jun-2019                                                                                                                                                                                                                                                                                                                                                                                                                                                                                                                                                                                                                                                                                                                                                                                                                                                                                                                                                                                                                                                                                                                                                                                                                                                                                                                                                                                                                                                                                                                                                                                                                                                                                                                                                                                                                                                                                                                                                                                                                                                                                                                                                                                                                                                                                               |
| Complete List of Authors:     | <p>Sania, Ayesha; Columbia University Medical Center, Neurology<br/>Sudfeld, CR; Harvard University T H Chan School of Public Health, Departments of Global Health and Population<br/>Danaei, Goodarz; Harvard School of Public Health, Global Health and Population<br/>Fink, Günther ; Schweizerisches Tropen- und Public Health-Institut, Household Economics and Health System Research Unit<br/>McCoy, D; Harvard Graduate School of Education<br/>Zhu, Zhaozhong; Harvard University T H Chan School of Public Health<br/>Fawzi, Mary C; Harvard Medical School, Department of Global Health and Social Medicine<br/>Akman, Mehmet; Marmara University School of Medicine,<br/>Arifeen, Shams E.; ICDDR B, Maternal and Child Health Division (MCHD)<br/>Barros, Aluisio; Federal University of Pelotas, Pelotas, Brazil<br/>Bellinger, David; Harvard Medical School<br/>Black, Maureen; University of Maryland School of Medicine,<br/>Bogale, Alemtsehay; The Nature's Bounty Co<br/>Braun, Joseph M; Brown University School of Public Health<br/>van den Broek, Nynke; Liverpool School of Tropical Medicine, aternal and Newborn Health; Liverpool School of Tropical Medicine<br/>Carrara, Verena; Shoklo Malaria Research Unit<br/>Duazo, Paulita; University of San Carlos<br/>Duggan, Christopher; Children's Hospital Boston<br/>Fernald, Lia; University of California, Berkeley, School of Public Health<br/>Gladstone, Melissa; University of Liverpool Institute of Translational Medicine, Women and Children's Health<br/>Hamadani, Jena; International Centre for Diarrhoeal Disease Research<br/>Handal, Alexis; University of New Mexico<br/>Harlow, Siobán; University of Michigan School of Public Health<br/>Hidrobo, Melissa; International Food Policy Research Institute<br/>Kuzawa, Chris ; Northwestern University, Department of Anthropology<br/>Kvestad, Ingrid; Uni Health, Uni Research, Regional Centre for Child and Youth Mental Health and Child Welfare<br/>Locks, Lindsey; Harvard University T H Chan School of Public Health, Nutrition<br/>Manji, Karim; Muhibili University of Health and Allied Sciences, Department of Pediatrics and Child Health<br/>Masanja, Honorati; Ifakara Health Institute, P.O Box 78373, Dar es Salaam, Tanzania, Health</p> |

|                                    |                                                                                                                                                                                                                                                                                                                                                                                                                                                                                                                                                                                                                                                                                                                                                                                                                                                                                                                                                                                                                                                                                                                                                                                                                                                                                                                                                                                                                                                                                                                                          |
|------------------------------------|------------------------------------------------------------------------------------------------------------------------------------------------------------------------------------------------------------------------------------------------------------------------------------------------------------------------------------------------------------------------------------------------------------------------------------------------------------------------------------------------------------------------------------------------------------------------------------------------------------------------------------------------------------------------------------------------------------------------------------------------------------------------------------------------------------------------------------------------------------------------------------------------------------------------------------------------------------------------------------------------------------------------------------------------------------------------------------------------------------------------------------------------------------------------------------------------------------------------------------------------------------------------------------------------------------------------------------------------------------------------------------------------------------------------------------------------------------------------------------------------------------------------------------------|
|                                    | <p>Matijasevich, Alicia; Universidade de Sao Paulo Faculdade de Medicina<br/> McDonald, Christine; UCSF Benioff Children's Hospital Oakland<br/> McGready, Rose; Shoklo Malaria Research Unit, Mahidol-Oxford Tropical<br/> Medicine Research Unit, Faculty of Tropical Medicine, Mahidol University;<br/> Centre for Tropical Medicine and Global Health, Nuffield Department of<br/> Medicine, University of Oxford<br/> Rizvi, Arjumand; Aga Khan Medical University, Pediatrics and Child<br/> Health<br/> Santos, Darci; Universidade Federal da Bahia<br/> Santos, Leticia ; Universidade Federal da Bahia<br/> Save, Dilsad ; Marmara Universitesi Tip Fakultesi<br/> Shapiro, Roger; Harvard University T H Chan School of Public Health,<br/> Department of Immunology and Infectious Disease<br/> Stoecker, Barbara; Oklahoma State University College of Human<br/> Environmental Sciences, Department of Nutritional Sciences<br/> Strand, Tor A. ; Sykehuset Innlandet Helseforetaket, Research<br/> Taneja, Sunita; Centre for Health Research and Development, Society<br/> for Applied Studies<br/> Tellez-Rojo, Martha-Maria; Instituto Nacional de Perinatologia<br/> Tofail, Fahmida; International Centre for Diarrhoeal Disease Research,<br/> Centre for Nutrition &amp; Food Security<br/> Yousafzai, Aisha; Harvard University T H Chan School of Public Health<br/> Ezzati, Majid; Imperial College London School of Public Health<br/> Fawzi, Wafaie.; Harvard University T H Chan School of Public Health</p> |
| <b>Primary Subject<br>Heading</b>: | Global health                                                                                                                                                                                                                                                                                                                                                                                                                                                                                                                                                                                                                                                                                                                                                                                                                                                                                                                                                                                                                                                                                                                                                                                                                                                                                                                                                                                                                                                                                                                            |
| Secondary Subject Heading:         | Epidemiology, Paediatrics, Public health                                                                                                                                                                                                                                                                                                                                                                                                                                                                                                                                                                                                                                                                                                                                                                                                                                                                                                                                                                                                                                                                                                                                                                                                                                                                                                                                                                                                                                                                                                 |
| Keywords:                          | Community child health < PAEDIATRICS, Developmental neurology &<br>neurodisability < PAEDIATRICS, PUBLIC HEALTH                                                                                                                                                                                                                                                                                                                                                                                                                                                                                                                                                                                                                                                                                                                                                                                                                                                                                                                                                                                                                                                                                                                                                                                                                                                                                                                                                                                                                          |
|                                    |                                                                                                                                                                                                                                                                                                                                                                                                                                                                                                                                                                                                                                                                                                                                                                                                                                                                                                                                                                                                                                                                                                                                                                                                                                                                                                                                                                                                                                                                                                                                          |

SCHOLARONE™  
Manuscripts

## Early life risk factors of motor, cognitive, and language development: a pooled analysis of studies from low-and middle-income countries

Ayesha Sania<sup>1</sup>(M.B.B.S, Sc.D), Christopher Sudfeld<sup>2</sup>(Sc.D), Goodarz Danaei<sup>2,3</sup>(Sc.D), Günther Fink<sup>4</sup>(Ph.D), Dana Charles McCoy<sup>5</sup>(Ph.D), Zhaozhong Zhu<sup>6</sup>(Sc.D), Mary C. Smith Fawzi<sup>7</sup>(Sc.D), Mehmet Akman<sup>8</sup>(MD, MPH), Shams Arifeen<sup>9</sup>(M.B.B.S, Dr.PH), Aluisio J. D. Barros<sup>10</sup>(MD, Ph.D), David Bellinger<sup>6,11</sup>(Ph.D), Maureen Black<sup>12</sup>(Ph.D), Alemtsehay Bogale<sup>13</sup>(Ph.D), Joseph Braun<sup>14</sup>(Ph.D), Nynke van den Broek<sup>15</sup>(Ph.D, FRCOG), Verena Ilona Carrara<sup>16</sup>(MD, Ph.D), Paulita Duazo<sup>17</sup>(BS), Christopher P. Duggan<sup>2,18,19</sup>(MD, MPH), Lia Fernald<sup>20</sup>(Ph.D, MBA), Melissa Gladstone<sup>21</sup>(MD, MRCP), Jena Hamadani<sup>9</sup>(Ph.D), Alexis J. Handal<sup>22</sup>(Ph.D., MPH), Siobán Harlow<sup>23</sup>(Ph.D.), Melissa Hidrobo<sup>24</sup>(Ph.D), Christopher W. Kuzawa<sup>25</sup>(Ph.D), Ingrid Kvestad<sup>26</sup>(Ph.D), Lindsey Locks<sup>18</sup>(Sc.D), Karim Manji<sup>27</sup>(MD, MPH), Honorati Masanja<sup>28</sup>(Ph.D), Alicia Matijasevich<sup>29</sup>(MD, Ph.D), Christine McDonald<sup>30</sup>(Sc.D), Rose McGready<sup>31</sup>(Ph.D), Arjumand Rizvi<sup>32</sup>(MSC), Darci Santos<sup>33</sup>(Ph.D), Leticia Santos<sup>33</sup>(Ph.D), Dilsad Save<sup>34</sup>(MD, MPH), Roger Shapiro<sup>35</sup>(MD, MPH), Barbara J. Stoecker<sup>36</sup>(Ph.D), Tor A. Strand<sup>37,38</sup>(MD, Ph.D), Sunita Taneja<sup>39</sup>(Ph.D), Martha-Maria Tellez-Rojo<sup>40</sup>(Ph.D), Fahmida Tofail<sup>41</sup>(M.B.B.S, Ph.D), Aisha K.Yousafzai<sup>2</sup>(Ph.D), Majid Ezzati<sup>42</sup>(Ph.D), Wafaie Fawzi<sup>2</sup>(M.B.B.S., Dr.PH)

### Affiliations:

<sup>1</sup>ICAP, Columbia University, Mailman School of Public Health, 722 W 168th St, New York, NY 10032, USA

<sup>2</sup>Department of Global Health and Population, Harvard T. H. Chan School of Public Health, 665 Huntington Ave, Boston, MA 02115, USA

<sup>3</sup>Department of Epidemiology, Harvard T. H. Chan School of Public Health, 677 Huntington Ave, Boston, MA 02115, USA

<sup>4</sup> Household Economics and Health System Research Unit, Swiss Tropical and Public Health Institute, Socinstrasse 57, 4002 Basel, Switzerland

<sup>5</sup>Harvard Graduate School of Education, Harvard University, 13 Appian Way, Cambridge, MA 02138, USA

<sup>6</sup>Department of Environmental Health, Harvard T. H. Chan School of Public Health, 665 Huntington Ave, Boston, MA 02115, USA

<sup>7</sup>Department of Global Health and Social Medicine, Harvard Medical School, 641 Huntington Ave, Boston, MA 02115, USA

<sup>8</sup>Department of Family Medicine, Marmara University Faculty of Medicine, Pendik, Istanbul, Turkey

<sup>9</sup>Maternal and Child Health Division, icddr,b, Dhaka, Bangladesh

<sup>10</sup>International Center for Equity in Health, Federal University of Pelotas, Pelotas, Brazil

<sup>11</sup>Boston Children's Hospital, 300 Longwood Ave, Boston, MA 02115, USA

<sup>12</sup>Department of Pediatrics, University of Maryland School of Medicine, 737 W. Lombard Street, Baltimore, MD 21201, USA



- 1  
2  
3 <sup>13</sup>The Nature's Bounty Co, 2100 Smithtown Avenue, Ronkonkoma, NY 11779, USA  
4 <sup>14</sup>Department of Epidemiology, Brown University School of Public Health, 121 South Main  
5 Street, Providence, RI 02912, USA  
6  
7 <sup>15</sup>Centre for Maternal and Newborn Health, Liverpool School of Tropical Medicine, University  
8 of Liverpool, Pembroke Place, Liverpool L3 5QA, UK  
9  
10 <sup>16</sup>Shoklo Malaria Research Unit, Mahidol-Oxford Tropical Medicine Research Unit, Faculty of  
11 Tropical Medicine, Mahidol University, Mae Sot, Thailand  
12  
13 <sup>17</sup>Office of Population Studies, University of San Carlos, Cebu City, Philippines  
14  
15 <sup>18</sup>Department of Nutrition, Harvard T. H. Chan School of Public Health, 665 Huntington Ave,  
16 Boston, MA 02115, USA  
17  
18 <sup>19</sup>Center for Nutrition, Boston Children's Hospital, 300 Longwood Ave, Boston, MA 02115,  
19 USA  
20  
21 <sup>20</sup>Public Health Nutrition and Community Health Sciences, University of California Berkeley  
22 School of Public Health, Berkeley, CA 94720, USA  
23  
24 <sup>21</sup>Department of Women's and Children's Health, Institute of Translational Medicine, University  
25 of Liverpool, Liverpool L8 7SS, UK  
26  
27 <sup>22</sup>College of Population Health, UNM Health Sciences Center, University of New Mexico,  
28 Albuquerque, NM 87131, USA  
29  
30 <sup>23</sup>Department of Epidemiology, School of Public Health, University of Michigan, 1415  
31 Washington Heights, Ann Arbor, MI 48109, USA  
32  
33 <sup>24</sup>Poverty, Health and Nutrition Division, International Food Policy Research Institute,  
34 Washington, DC, USA  
35  
36 <sup>25</sup>Department of Anthropology, Northwestern University, 1810 Hinman Avenue, Evanston, IL  
37 60208, USA  
38  
39 <sup>26</sup>Regional Centre for Child and Youth Mental Health and Child Welfare, Uni Research Health  
40 Department, Uni Research, Bergen, Norway  
41  
42 <sup>27</sup>Department of Paediatrics and Child Health, Muhimbili University of Health and Allied  
43 Sciences, Dar es Salaam, Tanzania  
44  
45 <sup>28</sup>Ifakara Health Institute, Tanzania  
46  
47 <sup>29</sup>Department of Preventive Medicine, School of Medicine, University of São Paulo, São Paulo,  
48 Brazil  
49  
50 <sup>30</sup>Children's Hospital Oakland Research Institute, UCSF Benioff Children's Hospital, Oakland,  
51 CA 94609, USA  
52  
53 <sup>31</sup>Mahidol University Faculty of Tropical Medicine. Shoklo Malaria Research Unit, Mahidol-  
54 Oxford Tropical Medicine Research Unit, Mae Sot, Thailand  
55  
56 <sup>32</sup>Department of Paediatrics and Child Health, Aga Khan University, Karachi, Pakistan  
57  
58 <sup>33</sup>Department of Collective Health, Institute of Collective Health, Federal University of Bahia,  
59 Salvador, Bahia, Brazil  
60  
61 <sup>34</sup>Marmara University School of Medicine, Department of Public Health, Istanbul, Turkey  
62  
63 <sup>35</sup>Department of Immunology and Infectious Disease, Harvard T. H. Chan School of Public  
64 Health, 665 Huntington Ave, Boston, MA 02115, USA  
65  
66 <sup>36</sup>Department of Nutritional Sciences, College of Human Environmental Sciences, Oklahoma  
67 State University, Stillwater, OK 74078, USA

<sup>37</sup>Department of Laboratory Medicine, Sykehuset Innlandet, Lillehammer, Norway

<sup>38</sup>Centre for International Health, University of Bergen, Bergen, Norway

<sup>39</sup>Center for Health Research and Development, Society for Applied Studies, New Delhi, India

<sup>40</sup>Division of Research on Public Health, National Institute of Perinatology, Mexico City, Mexico

<sup>41</sup>Nutrition and Clinical Services Division, icddr,b, Dhaka, Bangladesh

<sup>42</sup>Faculty of Medicine, School of Public Health, Imperial College London, London SW7 2AZ, UK

**Corresponding author:** Ayesha Sania,  
Department of Psychiatry,  
Columbia University Medical Center\*, 1051 Riverside Drive, New York, NY 10032, USA.  
Email: ays328@mail.harvard.edu  
\*Current affiliation

**Short title:** Risk factors of child development in LMIC

**Financial Disclosure:** The authors have no financial relationships relevant to this article to disclose.

**Role of funding source:**

This study was supported by Grand Challenges Canada under the Saving Brains program (grant # 0073-03) to Harvard T. H. Chan School of Public Health. Ayesha Sania was supported by National Institute of Allergy & Infectious Diseases of the National Institutes of Health under award number T32AI114398. The funding source was not involved in the design, conduct, analysis, interpretation, and writing up of the results, nor the decision to submit it for publication. The authors are independent from the study sponsors.

**Potential Conflicts of Interest:** The authors have no conflicts of interest relevant to this article to disclose

**Ethics committee approval:** The pooled study was approved by the Harvard T.H. Chan School of Public Health (IRB16-0256).

**Abbreviations:**

AGA= Appropriate for gestational age

BSID=Bayley Scales of Infant and Toddler Development

IUGR= intra-uterine growth restriction

LBW= Low birth weight, <2500 grams

LMIC= Low-and-middle income countries

LMP= last menstrual period

ECD=Early childhood development

SDGs=Sustainable Development Goals

SMDs=standardized mean differences

SGA=Small-for-gestational age

**Data availability:**

Data included in the study may be available upon request. This study contains deidentified data from 21 studies. Of them, 14 investigators have shared their data with researchers at Harvard School of Public Health and seven shared results of analyses. Therefore, permission from investigators of individual studies needs to be obtained before data sharing.

All forest plots of the meta-analyses of each risk factors have been uploaded as supplementary document and will be publicly available.

**Word Count:**

Abstract: 293

Manuscript: 3553

**Authors' contributions:**

Ayesha Sania conceptualized the study, conducted the literature review, data analysis and drafted the manuscript. Christopher Sudfeld, and Wafaie Fawzi conceptualized the study and drafted the manuscript. Goodarz Danaei, Günther Fink, Dana Charles McCoy, Mary C. Smith Fawzi and Majid Ezzati provided critical input in the study design, interpretation of results and reviewed the manuscript. Zhaozhong Zhu participated in literature review and data analysis for the study. Mehmet Akman, Shams Arifeen, Aluísio J. D. Barros, David Bellinger, Maureen Black, Alemtsehay Bogale, Joseph Braun, Nynke van den Broek, Verena Ilona Carrara, Paulita Duazo, Christopher P. Duggan, Lia Fernald, Melissa Gladstone, Jena Hamadani, Alexis J. Handal, Siobán Harlow, Melissa Hidrobo, Christopher W. Kuzawa, Ingrid Kvestad, Lindsey Locks, Karim Manji, Honorati Masanja, Alicia Matijasevich, Christine McDonald, Rose McGready, Arjumand Rizvi, Darci Santos, Leticia Santos, Dilsad Save, Roger Shapiro, Barbara J. Stoecker, Tor A. Strand, Sunita Taneja, Martha-Maria Tellez-Rojo, Fahmida Tofail, and Aisha K.Yousafzai contributed data to the study, analyzed data and reviewed the manuscript. All authors had full access to their respective study data and to all statistical reports and tables of the pooled analyses and can take responsibility for the integrity of the data and accuracy of data analyses. The corresponding author attests that all listed authors meet authorship criteria and that no others meeting the criteria have been omitted.

**Abstract:**

**Objective:** To determine the magnitude of relationships of early life factors with child development in LMICs.

**Design:** Meta-analyses of standardized mean differences (SMD) estimated from published and unpublished data.

**Data sources:** We searched Medline, bibliographies of key articles and reviews, and grey literature to identify studies from LMICs that collected data on early life exposures and child development. The most recent search was done on November 4, 2014. We then invited the first authors of the publications and investigators of unpublished studies to participate in the study.

**Eligibility criteria for selecting studies:** Studies that assessed at least one domain of child development in at least 100 children under 7 years of age and collected at least one early life factor of interest were included in the study.

**Analyses:** Linear regression models were used to assess SMDs in child development by parental and child factors within each study. We then produced pooled estimates across studies using random effects meta-analyses.

**Results:** We retrieved data from 21 studies including 20,882 children across 13 LMICs, to assess the associations of exposure to 14 major risk factors with child development. Children of mothers with secondary schooling had 0.14 SD (95% Confidence Interval, CI: 0.05, 0.25) higher cognitive scores compared to children whose mothers had primary education. Preterm birth was associated with 0.14 SD (-0.24, -0.05) and 0.23 SD (-0.42, -0.03) reductions in cognitive and motor scores, respectively. Maternal short stature, anemia in infancy, and lack of access to clean water and sanitation had significant negative associations with cognitive and motor development with effects ranging from -0.18 to -0.10 SDs.

**Conclusions:** Differential parental, environmental, and nutritional factors contribute to disparities in child development across LMICs. Targeting these factors from pre-pregnancy through childhood may improve health and development of children.

**Funding:** Grand Challenges Canada under the Saving Brains program (grant # 0073-03), National Institute of Health (grant # T32AI114398).

**Strengths and Limitations of this study:**

- Pooling data from 21 studies, this study provides the most comprehensive analysis of early life risk factors of child development in low-and middle-income countries
- The study cohorts were selected from 13 countries across the globe
- Uniform classifications of early life exposures and statistical analyses applied across studies
- 14 major risk factors, - parental, environmental and nutritional factors are included
- Data on important risk factors such as exposure to environmental neurotoxicants, responsive parenting behaviors, and child stimulation were not available

For peer review only

## Introduction:

More than 250 million children under age 5 years in low-and middle-income countries (LMICs) are at risk of not attaining their full development potential.<sup>1-3</sup> The first 1000 days (from conception through 24 months of age) is critical for children's development, as the plasticity of the rapidly developing brain makes it vulnerable to harmful exposures as well as receptive to positive stimuli during this period.<sup>4,5</sup> Suboptimal development in early childhood may have long-term detrimental effects on education<sup>6</sup> and income attainment,<sup>7</sup> which in turn contribute to poverty and inequality across the lifecycle, and possibly also across generations.<sup>8</sup> Disadvantaged children with developmental deficits lose an estimated 19.8% of adult income yearly,<sup>9</sup> with an estimated global cost of US\$ 177 billion for physical growth delays alone.<sup>10</sup> In recognition of the high burden and cost associated with early life disadvantage, the 2030 Sustainable Development Goals (SDGs) directly target early childhood development under SDG 4,<sup>11</sup> which calls for ensuring access to quality early childhood development care and pre-primary education for all children.

The relative importance of exposures to nutritional, socioeconomic and environmental risk factors in early life on different domains of child development in LMICs is poorly understood. Studies systematically reviewing the evidence linking early life risk factors to child outcomes primarily focused on growth (e.g., stunting),<sup>9,12</sup> identifying iodine deficiency, iron deficiency anemia, intrauterine growth restriction, maternal depression, exposure to violence, HIV infection as risk factors, and cognitive stimulation, maternal education, breastfeeding as protective factors.<sup>13,14</sup> However, the independent pathways from these risks to cognitive, motor and language development are not fully elucidated yet.<sup>15,16</sup> Consequently, priority risk factors and

1  
2  
3 interventions for improving cognitive, language, and motor development may differ from those  
4  
5 designed to improve physical development in LMICs.  
6

7  
8 To determine the magnitude of the relationships linking early life exposures with child  
9  
10 development in LMICs, we pooled data from 21 studies conducted in LMICs. We then examined  
11  
12 the associations of early life risk factors on cognitive, motor and language development among  
13  
14 children aged less than 7 years across studies. These pooled observational estimates are intended  
15  
16 to inform the design of individual and packaged intervention studies to promote early child  
17  
18 development in LMICs.  
19  
20  
21  
22  
23  
24  
25  
26  
27  
28  
29  
30  
31  
32  
33  
34  
35  
36  
37  
38  
39  
40  
41  
42  
43  
44  
45  
46  
47  
48  
49  
50  
51  
52  
53  
54  
55  
56  
57  
58  
59  
60

## Methods

### *Study identification:*

We searched Medline, bibliographies of key articles and reviews, and grey literature to identify datasets from low-income and middle-income countries (LMICs) that collected data on early life exposures and child development. Search terms included a list of risk factors, terms related to motor, cognitive, language and socioemotional development, and a list of low and middle income countries (list of search terms, appendix 1). The most recent search was done on November 4, 2014. We also identified additional datasets via communication with researchers of published studies that were not retrieved in our search. The primary criterion for inclusion of the datasets was the assessment of at least one domain of child development (cognitive, motor, language and socioemotional) using a standard child development assessment instrument in at least 100 children before 7 years of age, as well as the collection of at least one early life factor of interest as part of the study.

Following identification of the potential datasets, we contacted 50 first authors of the publications and investigators of unpublished studies, of whom 33 (66%) responded to participate in the present study (figure 1). We asked researchers to complete a survey that included questions about child development assessment tools used, age of developmental assessment and details on the early life factors measured in their study. Following the survey, 10 investigators declined to participate, 2 studies were excluded as the eligible sample size was less than 100 and 1 study was excluded as development was assessed after age 7 years. The investigators then shared results of pre-defined analyses on their data or shared data with researchers at the Harvard T.H. Chan School of Public Health to complete the analyses of individual studies and the meta-analyses.



### *Early life factors*

We created a list of early life risk factors based on the review of the current literature<sup>13 14</sup>. These risk factors are represented in the ‘Good Health’ and ‘Adequate Nutrition’ components of nurturing care framework for early childhood development proposed by the WHO<sup>17</sup>. We enquired about the availability of data on a list of risk factors in the preliminary survey sent to the investigators. Based on the survey responses, we then selected 14 early life factors that were available in at least four datasets to include in the pooled analyses. Following the standard definitions of categories used in published studies and the survey responses on how individual studies recorded data on each risk factors, we used uniform categorization of the risk factors applicable to all datasets. Risk factors were grouped into parental factors: father’s education and mother’s education (categories for each variable: none <1 year; primary 1 - <6 years; secondary 6-<10 years; higher  $\geq 10$  years), maternal age (<15 years, 15-<20 years, 20-<35 years;  $\geq 35$  years), maternal height (<145 cm, 145-<150 cm, 150-<155 cm, >155 cm) maternal body mass index (BMI; <18.5 kg/m<sup>2</sup>, 18.5-<25 kg/m<sup>2</sup>, 25-<30 kg/m<sup>2</sup>,  $\geq 30$  kg/m<sup>2</sup>), hemoglobin level during pregnancy (normal  $\geq 110$  g/L; mild anemia 100-109 g/L; moderate anemia 70-99 g/L) and child factors: birth weight (low birth weight <2500g; moderate low 2000-2500g; very low birth weight <2000g), preterm birth (preterm <37 weeks; late preterm 34-37 weeks; early preterm <34 weeks), small-for-gestational-age (SGA; <10 percentile; moderate SGA 3-<10 percentile; severe SGA <3 percentile) as determined by Alexander and Oken standards, exclusive breastfeeding until 6 months of age, hemoglobin levels in infancy (normal  $\geq 110$  g/L; mild anemia 100-109 g/L; moderate anemia 70-99 g/L), access to clean water (yes, no), access to sanitation (yes, no) and diarrhea preceding the 6 months before development assessment (yes, no). Details on the definition and categories of the risk factors are included in appendix 2. We also enquired about

1  
2  
3 data on birth spacing, maternal HIV infection, malaria, intimate partner violence and depression,  
4  
5 but a limited number of studies had data on these factors.  
6  
7

8  
9  
10 ***Outcomes:***  
11

12 We included cognitive, motor and language outcomes in the analyses, socioemotional outcomes  
13 were not measured in a sufficient number of studies. If a study measured child development on  
14 multiple occasions, we included the measurement obtained at the age closest to 24 months. Since  
15 different tools were used for development assessment across studies, all development scores  
16 were standardized (z-scored) to ensure comparability between the measurements in different  
17 studies.  
18  
19  
20  
21  
22  
23  
24  
25  
26  
27

28 ***Analyses of individual studies:***  
29

30 Within each study, linear regression models were used to assess standardized mean differences  
31 (SMDs) in cognitive, motor, and language scores for the selected risk factors. Multivariable  
32 models were adjusted for child's age and sex, maternal education and a measure of  
33 socioeconomic status (e.g. household income or wealth index). Maternal education was adjusted  
34 as a confounder in all models except for the model that estimated the effects of maternal  
35 education. If a study was a randomized trial, intervention assignment was also included in the  
36 adjusted model. In addition, estimates for preterm birth and gestation-specific birth weight  
37 category (SGA and appropriate-for-gestational-age) were adjusted for each other. The missing  
38 indicator method was used for covariates when <10% of the data were missing; if more than 10%  
39 were missing the covariate was excluded from the analyses.  
40  
41  
42  
43  
44  
45  
46  
47  
48  
49  
50  
51  
52  
53  
54  
55  
56  
57  
58  
59  
60

***Meta-analysis:***

Meta-analysis for a given risk factor was conducted if estimates from at least four studies were available. To account for the variation in tools used for measuring development we only pooled the means and standard errors of the standardized outcomes scores. As multivariable adjustment substantially changed the effect estimates, we used the adjusted effect estimates for meta-analysis. Given that heterogeneous effects seemed likely across the large variety of contexts studied, random effects meta-analysis was conducted using the DerSimonian and Laird method.<sup>18</sup> Heterogeneity was assessed using  $I^2$  statistics. All analyses were conducted using the metaan commands in Stata 12.0 (StataCorp, College Station, TX)

***Ethical consideration:***

The pooled study was approved by the Harvard T.H. Chan School of Public Health (IRB16-0256).

***Patient and Public Involvement:***

Patients and or public were not involved.

## Results:

Table 1 shows the characteristics of the studies included in the analyses. We included 21 data sets with developmental measurements on 20,882 children of which 8 were from Asia,<sup>19-26</sup> 7 were from sub-Saharan Africa,<sup>27-33</sup> 5 were from Latin America and 1 from Europe.<sup>34-39</sup> The majority of studies (n=18), including 12 randomized trials,<sup>19-23 26 27 30-33 39</sup> followed up the participants prospectively. The Bayley Scales of Infant and Toddler Development (BSID) was used to assess child development in most of the studies with, BSID-III administered in 5 studies,<sup>24 27 31-33</sup> BSID-II in 5 studies,<sup>19-22 30</sup> and BSID I in 1 study.<sup>39</sup> The Ages and Stages questionnaire was used in 2 studies,<sup>23 37</sup> and a few studies used local adaptations of standard tools.<sup>29 36</sup> The majority of the studies had data on both motor and cognitive development,<sup>19-25 27-39</sup> 1 study had data on motor development only<sup>26</sup> and 6 studies provided data on language development.<sup>29 31-34</sup> Development was assessed before age 2 years in most studies,<sup>19-27 29-35 38 39</sup> except for 3 studies that assessed development at ages between 3-6 years.<sup>28 36 37</sup>

### *Parental factors:*

Pooled estimates for the association of parental factors with child cognitive, motor, and language development are presented in Table 2. Higher attained maternal education was associated with improved cognitive, motor, and language development scores. Children whose mothers attended or completed secondary school had 0.14 SD (95% CI: 0.05, 0.25), 0.12 SD (95% CI: 0.06, 0.18), and 0.13 SD (95% CI: 0.04, 0.21) higher cognitive, motor and language scores, respectively, as compared to children whose mothers only had primary school education. Compared to children of mothers with primary education, children of mothers with  $\geq$  ten years of education scored 0.36 SD (95% CI: 0.19, 0.48), 0.26 SD (95% CI: 0.14, 0.38) and 0.21 SD (95% CI 0.09, 0.33) higher

1  
2  
3 in cognitive, motor and language scores, respectively. Children of mothers with no formal  
4 schooling scored lowest in cognitive, motor and language scores. There was a significant  
5  
6 positive association between father's education and cognitive and motor development after  
7  
8 adjusting for maternal education, although the magnitude of the effect sizes was smaller than for  
9  
10 those of maternal education. We found no significant relationships between maternal age at birth  
11  
12 and cognitive, motor, or language development.  
13  
14  
15

16  
17  
18  
19 Children of mothers with short stature (height <155 cm) tended to have lower cognitive, motor,  
20  
21 and language scores as compared with a maternal height >155cm. Children whose mothers were  
22  
23 <145cm scored 0.10 SD (95% CI -0.20, -0.004), 0.11 SD (95% CI: -0.19, -0.03), and 0.11 SD  
24  
25 (95% CI: -0.31, 0.09) lower on cognitive, motor, and language development, respectively. Low  
26  
27 maternal BMI (<18.5 kg/m<sup>2</sup>) was significantly associated with lower cognitive development  
28  
29 scores (SD: -0.10; 95% CI -0.19, -0.02), but not motor or language development. There was no  
30  
31 significant association of maternal hemoglobin with child cognition.  
32  
33  
34  
35  
36  
37

### 38 ***Child factors:***

39  
40 Pooled estimates for the association of child factors with development are presented in Table 3.  
41  
42 Compared to children born with normal birth weight, children born with low birth weight  
43  
44 (<2500g) had significantly poorer cognitive and motor scores. Children with birthweights  
45  
46 <2000g had on average 0.27 SD (95% CI: -0.49, -0.07) lower cognitive, 0.26 SD (95% CI: -0.40,  
47  
48 -0.12) lower motor and 0.28 SD (95% CI: -0.60, 0.05) lower language scores, compared with  
49  
50 normal birthweight children (≥2500 g). Compared to term and appropriate for gestational age  
51  
52 (AGA) infants, preterm-AGA infants had 0.14 SD (95% CI: -0.24, -0.05) and 0.23 SD (95% CI:  
53  
54  
55  
56  
57  
58  
59  
60

1  
2  
3 -0.42, -0.03) lower cognitive and motor scores, respectively. Term-SGA infants had poorer  
4  
5 developmental scores in some studies, but the pooled effect estimates for term-SGA, adjusted for  
6  
7 preterm birth, were not statistically significant.  
8  
9

10  
11  
12 Anemia in infancy was significantly and negatively associated with both motor and cognitive  
13  
14 development scores. Combined effect sizes of moderate anemia were -0.18 SD (95% CI -0.27, -  
15  
16 0.09) for motor and -0.11 SD (95% CI -0.12, - 0.10) for cognitive scores. Compared to children  
17  
18 residing in households with access to clean water, children without access had 0.10 SD (95% CI:  
19  
20 -0.12, -0.09) lower cognitive and 0.07 SD (95% CI: -0.16, 0.01) lower motor and 0.15 SD (95%  
21  
22 CI: -0.35, -0.05) lower language scores. Children without access to clean sanitation had 0.13 SD  
23  
24 (95% CI: -0.18, -0.07) lower cognitive and 0.10 SD (95% CI: -0.19, -0.01) lower motor scores.  
25  
26  
27

28 In the pooled analyses, exclusive breastfeeding until 6 months of age and diarrhea during the  
29  
30 preceding 6-month of development assessment did not have significant associations with either  
31  
32 cognitive or motor development.  
33  
34

35 Figures 2 and 3 present effect sizes of all risk factors included in the analyses. Forests plots of  
36  
37 metanalysis of individual risk factors are included in appendix 2, Figures 1-86.  
38  
39  
40  
41  
42  
43  
44  
45  
46  
47  
48  
49  
50  
51  
52  
53  
54  
55  
56  
57  
58  
59  
60

### Discussion:

This pooled analysis of development assessment of 20,882 children from 21 LMIC studies determined that low maternal and paternal education, short maternal stature, low birth weight, preterm birth, anemia in infancy, and lack of access to clean water and sanitation were associated with lower child development scores among children < 7 years of age. We did not find significant associations of maternal anemia, fetal growth restriction, exclusive breastfeeding, or childhood diarrhea with development scores.

We observed a dose-response relationship between parental education and child development. While a large body of literature supports the consistent role of maternal education in promoting children's language and cognitive developments, evidence on the role of paternal education is more limited.<sup>35 40 41</sup> Recent reports suggest advanced language and cognitive development among children of more educated fathers that persisted after adjustment for family income and mothers' education.<sup>42</sup> Maternal education is associated with more warm, responsive, and stimulating home environments, which in turn are predictive of more positive developmental outcomes for children.<sup>43</sup> High maternal education is also linked with protective factors like good feeding and hygiene practices and frequent utilization of antenatal care and child immunization.<sup>44 45</sup> In addition, low maternal education is associated with known risk factors of poor child development such as malnutrition in children, and depression and stress in mothers.<sup>46 47</sup> Although prior work suggests that less educated mothers tend to be less receptive to early childhood development (ECD) messages, research also shows that their children may benefit more from ECD interventions.<sup>48</sup> Therefore, adopting a 2-generational intervention approach to empower parents and improve parenting capacity are likely to generate long-term benefits for child development.

1  
2  
3 Due to the availability of maternal education data, low maternal education can serve as a simple  
4 risk marker to target children in need of ECD intervention.<sup>49</sup>  
5  
6  
7  
8  
9

10 We found significant negative associations of preterm birth with cognitive and motor  
11 development but not with language development. Meta-analyses of studies conducted in  
12 developed countries reported lower IQ scores and cognitive functioning,<sup>50-52</sup> along with deficits  
13 in motor<sup>53</sup>, language<sup>54</sup>, and visual-spatial abilities<sup>55</sup> in preterm infants. Reduction of the  
14 intrauterine period interrupts the trajectory of neurodevelopmental processes such as synapse  
15 formation and myelination, which often leads to neurocognitive deficits.<sup>56</sup> Although most  
16 preterm infants catch up in physical growth<sup>57</sup>, this deficit in neurocognitive development often  
17 persists into childhood and adolescence.<sup>58 59</sup> Given the high incidence of preterm delivery in  
18 LMIC<sup>60</sup> and the increased survival of preterm infants with medical advances, the burden of the  
19 developmental deficits caused by preterm birth in LMIC may be increasing. There are currently  
20 few interventions to prevent preterm birth<sup>61</sup>; however, a variety of psychosocial interventions to  
21 alleviate the adverse neurodevelopmental effects of preterm birth implemented at different points  
22 in early childhood have shown modest short-term benefits.<sup>62</sup>  
23  
24  
25  
26  
27  
28  
29  
30  
31  
32  
33  
34  
35  
36  
37  
38  
39  
40  
41

42 We found that fetal growth restriction, assessed via SGA, was not significantly associated with  
43 child development. This agrees with several reports from developed countries<sup>63-65</sup> whereas others  
44 have reported adverse effects of SGA on cognitive and motor functioning<sup>32 66 67</sup>. These disparate  
45 findings could be caused by different definitions of SGA and/or timing of the developmental  
46 assessment. Most studies from LMICs used LBW (as marker of SGA), which is also caused by  
47 prematurity, a major risk predictor of child development. There is some evidence that with  
48  
49  
50  
51  
52  
53  
54  
55  
56  
57  
58  
59  
60



1  
2  
3 adequate nutrition, the developmental deficit in SGA infants is often compensated with age,  
4  
5 although the gap in physical growth remains<sup>68</sup>. This finding underscores the potentially  
6  
7 differential roles and separate causal mechanisms of effects of early life risk factors for physical  
8  
9 and mental development. It is important to note that the effect size for SGA may be biased  
10  
11 downwards considering the heterogeneity in outcome and the measurement error due to the use  
12  
13 of last menstrual period (LMP) date for the estimation of gestational age in most the studies. We  
14  
15 found significant negative associations between short maternal stature (<145 cm) and low BMI  
16  
17 (<18.5 kg/m<sup>2</sup>)<sup>69</sup> on cognitive function, which may indicate the role of chronic malnutrition of  
18  
19 mothers over their life course on pregnancy health and development of fetus. These are also  
20  
21 known risk factors of SGA,<sup>69</sup> suggesting that adverse effects of fetal growth restriction on child  
22  
23 development are possible. Further research is needed to quantify the effects of fetal growth  
24  
25 restriction on children's development and evaluate the effects of interventions to alleviate the  
26  
27 negative impacts of SGA on development.  
28  
29  
30  
31  
32  
33  
34

35 We found an adverse role of anemia in infancy with motor and cognitive development. Prior  
36  
37 studies reported significant effects of anemia on cognitive, motor and socioemotional  
38  
39 development that persisted into middle childhood during longitudinal follow-up<sup>70</sup>. Worldwide,  
40  
41 the predominant cause of anemia for infants and children is iron deficiency<sup>71</sup>, which can interfere  
42  
43 with myelination, synapse formation and protein expression during sensitive periods of  
44  
45 neurodevelopment<sup>72</sup>. Meta-analyses of randomized trials of infant iron supplementation have not  
46  
47 established an effect on child development; however statistical power to detect effect sizes of <  
48  
49 0.2 SD as our analysis predicts is limited due to few trials with large enough sample sizes.<sup>73 74</sup> In  
50  
51 our pooled analyses, maternal anemia during pregnancy, an important determinant of anemia in  
52  
53  
54  
55  
56  
57  
58  
59  
60

1  
2  
3 infancy<sup>75</sup>, was not significantly associated with children's development. We also did not find a  
4  
5 significant association between exclusive breastfeeding until 6 months of age and children's  
6  
7 development. Nevertheless, few studies included in our pooled analyses had a sufficient number  
8  
9 of infants who were exclusively breastfed until six months to allow for a well-powered analysis.  
10  
11 Because of the multidimensional benefits of breastfeeding from infection prevention to fostering  
12  
13 mother-infant bonding and infant attachment, significant positive effects of exclusive  
14  
15 breastfeeding on child development are plausible. Meta-analyses of studies of effects of  
16  
17 breastfeeding on children's development reported significant increases in intelligence and  
18  
19 cognitive scores<sup>76 77</sup>; however some studies have attributed these associations entirely to the  
20  
21 presence of confounding by socioeconomic status and stimulation at home.<sup>78</sup>  
22  
23  
24  
25  
26  
27

28  
29 This study is among the first to report on the associations between lack of access to safe water  
30  
31 and sanitation and child cognitive development. The burden of developmental deficit attributed  
32  
33 to these risk factors is likely very high as a large proportion of the population in LMICs reside in  
34  
35 unhygienic environments with limited access to safe water. The effects of poor sanitation and  
36  
37 unsafe water on child cognitive development are potentially mediated through childhood anemia,  
38  
39 inflammation and undernutrition resulting from frequent enteric infections<sup>79</sup>. However, in the  
40  
41 pooled analyses, we did not find any significant adverse associations between diarrhea and  
42  
43 development, which is different from previously published evidence<sup>23 80 81</sup>. One potential  
44  
45 explanation for the lack of association found in this study may be measurement error: diarrhea is  
46  
47 inherently complex and hard to measure; variations in the definitions of episodes as well as  
48  
49 parental inability to correctly report diarrhea may have led to the failure to detect potential  
50  
51 effects of diarrhea on cognitive, motor and language development in this study.  
52  
53  
54  
55  
56  
57  
58  
59  
60

1  
2  
3 The strengths of this pooled study include the global coverage of the cohorts, the large sample  
4 size, and uniform classifications of early life exposures and statistical analyses across studies.  
5  
6 Nevertheless, there are also several limitations, including the lack of data on exposure to  
7  
8 environmental neurotoxicants, maternal depression, responsive parenting behaviors, and child  
9  
10 stimulation and early education. A recent meta-analysis determined that the potential effect of  
11  
12 responsive stimulation on cognitive development at 2 years of age was +0.42SD (95% CI: 0.36,  
13  
14 0.48)<sup>82</sup>, which is larger than all risk factors examined in our analysis. Thus, comprehensive  
15  
16 packages of environmental, nutrition, and stimulation interventions may produce larger effect  
17  
18 sizes than interventions targeting single risks. In addition, due to the observational nature of the  
19  
20 studies included in this analysis, we are unable to determine a causal relationship between  
21  
22 parental and child factors with child development. Although we have adjusted for major  
23  
24 confounders the potential for residual confounding remains. Last, there was moderate to high  
25  
26 levels of heterogeneity, as indicated by the  $I^2$  values, in some of our pooled estimates. The  
27  
28 magnitude of the relationship for maternal education, prematurity, birthweight, SGA, and access  
29  
30 to water and sanitation appeared to vary by study cohort. As a result, cultural and other  
31  
32 contextual factors may be important in determining the strength of the relationship between  
33  
34 health and nutrition exposures with child development outcomes. Accordingly, future  
35  
36 intervention studies should be conducted among diverse study populations as their effect may  
37  
38 importantly differ by setting.  
39  
40  
41  
42  
43  
44  
45  
46  
47  
48

49 In summary, in a pooled study of 21 studies in LMICs, we determined that multiple risk factors  
50  
51 classically associated with child morbidity and mortality also appear to have negative  
52  
53 associations with cognitive, motor, and language development. As a result, our study suggests  
54  
55  
56  
57  
58  
59  
60

1  
2  
3 that interventions that span pre-pregnancy through early and middle childhood may be necessary  
4  
5 to provide optimal child development in LMICs. Future research should focus on determining  
6  
7 the effectiveness of, and delivery strategies for comprehensive intervention packages to promote  
8  
9 child development.  
10  
11  
12  
13  
14  
15  
16  
17  
18  
19  
20  
21  
22  
23  
24  
25  
26  
27  
28  
29  
30  
31  
32  
33  
34  
35  
36  
37  
38  
39  
40  
41  
42  
43  
44  
45  
46  
47  
48  
49  
50  
51  
52  
53  
54  
55  
56  
57  
58  
59  
60

For peer review only

**Key Words:**

Motor development  
cognitive development  
Language development  
Early life risk factors  
Preterm  
SGA  
Maternal education  
Paternal education  
Maternal short stature  
Maternal anemia  
anemia in infancy,  
Access to clean water  
Access to sanitation  
Breastfeeding  
Diarrhea

**Figure Legends**

Figure 1: Flow chart of study selection

Figure 2: Pooled estimates of association between maternal factors and development

Figure 3: Pooled estimates of association between child factors and development

Table 1: Characteristics of the included studies

| Study                     | Setting                        | Primary study design | Study population                                       | N (data on child development)           | Child development tool used | Child age in years at assessment (mean±SD)                                                                                                          |            |
|---------------------------|--------------------------------|----------------------|--------------------------------------------------------|-----------------------------------------|-----------------------------|-----------------------------------------------------------------------------------------------------------------------------------------------------|------------|
| <b>Asia</b>               |                                |                      |                                                        |                                         |                             |                                                                                                                                                     |            |
| 1                         | Black (2004) <sup>19</sup>     | Bangladesh           | randomized controlled trial                            | birth cohort                            | 221                         | Bayley Scales of Infant and Toddler Development, 2nd edition (BSID-II) and the Home Observation for Measurement of the Environment (HOME) Inventory | 1.06±0.03  |
| 2                         | Tofail (2008) <sup>20</sup>    | Bangladesh           | randomized controlled trial                            | birth cohort                            | 2853 total (2116 tested)    | 2 problem-solving tests, motor index of Bayley Scales of Infant and Toddler Development, 2nd edition (BSID-II) and Wolke's behavior ratings         | 0.61±0.02  |
| 3                         | Tofail (2012) <sup>21</sup>    | Bangladesh           | randomized controlled trial                            | prospective, community-based cohort     | 249                         | Bayley Scales of Infant and Toddler Development, 2nd edition (BSID-II)                                                                              | 0.84±0.01  |
| 4                         | Taneja (2005) <sup>22</sup>    | India                | randomized placebo-controlled trial                    | Prospective, community-based cohort     | 571                         | Bayley Scales of Infant and Toddler Development, 2nd edition (BSID-II)                                                                              | 1.25±0.16  |
| 5                         | Kvestad (2015) <sup>23</sup>   | India                | randomized placebo-controlled trial                    | prospective, community-based cohort     | 422                         | Ages and Stages Questionnaire, 3 <sup>rd</sup> edition (ASQ-3)                                                                                      | 1.37±0.60  |
| 6                         | Yousafzai (2014) <sup>24</sup> | Pakistan             | community-based cluster-randomized effectiveness trial | prospective, community-based cohort     | 1357                        | Bayley Scales of Infant and Toddler Development, 3rd edition (BSID-III)                                                                             | 11.6 ±0.83 |
| 7                         | Duazo (2010) <sup>25</sup>     | Philippines          | longitudinal program evaluation                        | birth cohort                            | 4904                        | Philippines Revised Early Childhood Development Checklist (REC)                                                                                     | 1.62±0.88  |
| 8                         | McGready (2007) <sup>26</sup>  | Thailand             | randomized controlled trial                            | prospective, facility-based cohort      | 503                         | Shoklo Developmental Test                                                                                                                           | 1.62±0.02  |
| <b>Sub-Saharan Africa</b> |                                |                      |                                                        |                                         |                             |                                                                                                                                                     |            |
| 9                         | Shapiro (2013) <sup>27</sup>   | Botswana             | randomized controlled trial                            | prospective, community-based cohort     | 224                         | Bayley Scales of Infant and Toddler Development, 3rd edition (BSID-III)                                                                             | 2.03±0.08  |
| 10                        | Alemtehay (2009) <sup>28</sup> | Ethiopia             | cross-sectional study                                  | cross-sectional, community-based cohort | 100                         | Raven's Colored Progressive Matrices (CPM) and Kaufman Assessment Battery for Children-II (KABC-II)                                                 | 5.11±0.24  |
| 11                        | Gladstone (2011) <sup>29</sup> | Malawi               | cross-sectional community-based cohort study           | community-based cohort                  | 840                         | Ten Question Questionnaire [TQQ] and Malawi Developmental Assessment Tool [MDAT]                                                                    | 1.74±0.33  |
| 12                        | McDonald (2013) <sup>30</sup>  | Tanzania             | randomized placebo-controlled trial                    | birth cohort                            | 305                         | Bayley Scales of Infant and Toddler Development, 2nd edition (BSID-II)                                                                              | 1.28±0.04  |
| 13                        | Manji (2014) <sup>31</sup>     | Tanzania             | randomized placebo-controlled trial                    | birth cohort                            | 206                         | Bayley Scales of Infant and Toddler Development, 3rd edition (BSID-III)                                                                             | 1.28±0.04  |
| 14                        | Sudfeld (2015) <sup>32</sup>   | Tanzania             | randomized placebo-controlled trial                    | birth cohort                            | 958                         | Bayley Scales of Infant and Toddler Development, 3rd edition (BSID-III)                                                                             | 2.25±0.52  |

|    | <b>Study</b>                   | <b>Setting</b> | <b>Primary study design</b>         | <b>Study population</b>                             | <b>N<br/>(data on child development)</b> | <b>Child development tool used</b>                                                                                       | <b>Child age in years at assessment (mean±SD)</b> |
|----|--------------------------------|----------------|-------------------------------------|-----------------------------------------------------|------------------------------------------|--------------------------------------------------------------------------------------------------------------------------|---------------------------------------------------|
| 15 | Locks (2016) <sup>33</sup>     | Tanzania       | randomized placebo-controlled trial | birth cohort                                        | 248                                      | Bayley Scales of Infant and Toddler Development, 3rd edition (BSID-III)                                                  | 1.21±0.03                                         |
|    | <b>Latin America</b>           |                |                                     |                                                     |                                          |                                                                                                                          |                                                   |
| 16 | Santos IS (2011) <sup>34</sup> | Brazil         | longitudinal birth cohort survey    | 2004 Pelotas birth cohort                           | 3868                                     | Battelle Screening Developmental Inventory (BSDI)                                                                        | 1.99 ± 0.05                                       |
| 17 | Santos (2008) <sup>35</sup>    | Brazil         | longitudinal birth cohort survey    | Longitudinal, community-based cohort                | 365                                      | Wechsler Pre-School and Primary Scale of Intelligence-Revised (WPPSI-R)                                                  | 5.80±3.02                                         |
| 18 | Fernald (2011) <sup>36</sup>   | Ecuador        | randomized effectiveness trial      | Prospective, community-based cohort                 | 1265                                     | MacArthur-Bates Communicative Development Inventory, short form, Spanish version                                         | 4.59±0.87                                         |
| 19 | Handal (2008) <sup>37</sup>    | Ecuador        | cross-sectional                     | Community based, selected using door-to-door survey | 283                                      | Ages and Stages Questionnaire (ASQ)                                                                                      | 2.46±1.46                                         |
| 20 | Braun (2012) <sup>38</sup>     | Mexico         | prospective cohort study            | prospective, facility-based cohort                  | 1032                                     | Bayley Scales of Infant and Toddler Development, 2nd edition (BSID-II)<br>McCarthy Scales of Children's Abilities (MSCA) | 2.02±0.03                                         |
|    | <b>Europe</b>                  |                |                                     |                                                     |                                          |                                                                                                                          |                                                   |
| 21 | Akman (2004) <sup>39</sup>     | Europe-Turkey  | randomized clinical trial           | facility-based hospital                             | 108                                      | Bayley Scales of Infant and Toddler Development, 1st edition (BSID-I)                                                    | 1.42±0.59                                         |

view only

Table 2: Summary results of meta-analysis of associations of parental factors and cognitive, motor and language developments

| Risk Factor                            | Cognitive      |                                    |                 |                    | Motor          |                                    |                 |                    | Language       |                                    |                 |                    |
|----------------------------------------|----------------|------------------------------------|-----------------|--------------------|----------------|------------------------------------|-----------------|--------------------|----------------|------------------------------------|-----------------|--------------------|
|                                        | No. of studies | Adjusted <sup>1</sup> SMD (95% CI) | <i>p</i> -value | I <sup>2</sup> (%) | No. of studies | Adjusted <sup>1</sup> SMD (95% CI) | <i>p</i> -value | I <sup>2</sup> (%) | No. of studies | Adjusted <sup>1</sup> SMD (95% CI) | <i>p</i> -value | I <sup>2</sup> (%) |
| <b>Mother's education</b>              |                |                                    |                 |                    |                |                                    |                 |                    |                |                                    |                 |                    |
| No education (<1 years)                | 15             | -0.12 (-0.24, -0.008)              | 0.05            | 50.8               | 18             | -0.07 (-0.13, -0.01)               | 0.03            | 18.2               | 5              | -0.06 (-0.21, -0.09)               | 0.49            | 35.5               |
| Primary (1- <6 years)                  |                | Reference                          |                 |                    |                | Reference                          |                 |                    |                | Reference                          |                 |                    |
| Secondary (6- <10 years)               | 17             | 0.14 (0.05, 0.24)                  | < 0.01          | 59.7               | 19             | 0.12 (0.06, 0.18)                  | < 0.01          | 51.8               | 5              | 0.13 (0.04, 0.21)                  | 0.04            | 0.0                |
| Higher (≥10 years)                     | 17             | 0.36 (0.19, 0.48)                  | < 0.01          | 65.8               | 19             | 0.26 (0.14, 0.38)                  | < 0.01          | 70.6               | 5              | 0.21 (0.09, 0.33)                  | 0.03            | 0.0                |
| <b>Father's education</b>              |                |                                    |                 |                    |                |                                    |                 |                    |                |                                    |                 |                    |
| No education (<1 years)                | 13             | -0.005 (-0.08, 0.07)               | 0.91            | 0.0                | 17             | -0.08 (-0.11, -0.04)               | < 0.01          | 0.0                | 4              | 0.02 (-0.15, 0.20)                 | 0.80            | 30.0               |
| Primary (1- <6 years)                  |                | Reference                          |                 |                    |                | Reference                          |                 |                    |                | Reference                          |                 |                    |
| Secondary (6- <10 years)               | 15             | 0.06 (0.015, 0.11)                 | 0.02            | 0.0                | 17             | 0.08 (0.03, 0.13)                  | < 0.01          | 30.3               | 4              | 0.09 (0.02, 0.16)                  | 0.08            | 0.0                |
| Higher (≥10 years)                     | 15             | 0.15 (0.08, 0.21)                  | < 0.01          | 0.0                | 17             | 0.18 (0.10, 0.26)                  | < 0.01          | 42.3               | 4              | 0.22 (0.11, 0.32)                  | 0.03            | 17.9               |
| <b>Mother's age</b>                    |                |                                    |                 |                    |                |                                    |                 |                    |                |                                    |                 |                    |
| <15 years                              | 5              | -0.06 (-0.13, 0.25)                | 0.57            | 0.0                | 5              | 0.12 (-0.06, 0.30)                 | 0.25            | 0.0                | 2              | n/a                                | n/a             | n/a                |
| 15-<20 years                           | 18             | -0.007 (-0.06, 0.05)               | 0.80            | 10.7               | 20             | -0.02 (-0.11, 0.08)                | 0.75            | 83.6               | 6              | 0.01 (-0.09, 0.11)                 | 0.85            | 37.0               |
| 20-34 years                            |                | Reference                          |                 |                    |                | Reference                          |                 |                    |                | Reference                          |                 |                    |
| ≥35 years                              | 18             | -0.01 (-0.06, 0.04)                | 0.58            | 0.0                | 20             | -0.006 (-0.07, 0.05)               | 0.85            | 50.1               | 6              | 0.02 (-0.05, 0.09)                 | 0.59            | 0.0                |
| <b>Mother's height</b>                 |                |                                    |                 |                    |                |                                    |                 |                    |                |                                    |                 |                    |
| <145 cm                                | 11             | -0.10 (-0.20, -0.004)              | 0.07            | 0.0                | 13             | -0.11 (-0.19, -0.03)               | 0.02            | 21.5               | 5              | -0.11 (-0.31, 0.09)                | 0.35            | 0.0                |
| 145 -<150 cm                           | 13             | -0.11 (-0.19, -0.02)               | 0.03            | 27.1               | 15             | -0.07 (-0.16, 0.03)                | 0.17            | 71.1               | 5              | -0.06 (-0.13, 0.06)                | 0.52            | 0.0                |
| 150- <155 cm                           | 13             | -0.09 (-0.14, -0.04)               | < 0.01          | 3.3                | 15             | -0.04 (-0.09, 0.009)               | 0.14            | 31.5               | 5              | -0.05 (-0.12, 0.02)                | 0.22            | 0.0                |
| >155 cm                                |                | Reference                          |                 |                    |                | Reference                          |                 |                    |                | Reference                          |                 |                    |
| <b>Mother's BMI (kg/m<sup>2</sup>)</b> |                |                                    |                 |                    |                |                                    |                 |                    |                |                                    |                 |                    |



| Risk Factor                            | Cognitive      |                                    |         |                    | Motor          |                                    |         |                    | Language       |                                    |         |                    |
|----------------------------------------|----------------|------------------------------------|---------|--------------------|----------------|------------------------------------|---------|--------------------|----------------|------------------------------------|---------|--------------------|
|                                        | No. of studies | Adjusted <sup>1</sup> SMD (95% CI) | p-value | I <sup>2</sup> (%) | No. of studies | Adjusted <sup>1</sup> SMD (95% CI) | p-value | I <sup>2</sup> (%) | No. of studies | Adjusted <sup>1</sup> SMD (95% CI) | p-value | I <sup>2</sup> (%) |
| <18.5                                  | 11             | -0.11 (-0.20, -0.02)               | 0.03    | 12.7               | 13             | -0.02 (-0.11, 0.07)                | 0.69    | 51.4               | 3              | n/a                                | n/a     | n/a                |
| 18.5 -<25                              |                | Reference                          |         |                    |                | Reference                          |         |                    |                | Reference                          |         |                    |
| 25-<30                                 | 12             | 0.03 (-0.04, 0.09)                 | 0.44    | 23.3               | 14             | 0.04 (-0.03, 0.11)                 | 0.31    | 64.6               | 4              | -0.04 (-0.21, 0.13)                | 0.70    | 61.0               |
| ≥30                                    | 12             | -0.02 (-0.17, 0.14)                | 0.82    | 46.3               | 14             | -0.02 (-0.14, 0.10)                | 0.77    | 63.6               | 4              | -0.14 (-0.34, 0.06)                | 0.26    | 35.9               |
| <b>Mother's hemoglobin level (g/L)</b> |                |                                    |         |                    |                |                                    |         |                    |                |                                    |         |                    |
| Normal (≥110 g/L))                     |                | Reference                          |         |                    |                | Reference                          |         |                    |                | Reference                          |         |                    |
| Mild anemia (100-109 g/L)              | 4              | -0.06 (-0.15, 0.03)                | 0.28    | 0.0                | 11             | 0.06 (0.008, 0.11)                 | 0.04    | 29.7               | 1              | n/a                                | n/a     | n/a                |
| Moderate anemia (70-99 g/L)            | 4              | -0.06 (-0.19, 0.06)                | 0.39    | 0.0                | 6              | -0.01 (-0.06, 0.04)                | 0.68    | 16.3               | 1              | n/a                                | n/a     | n/a                |

<sup>1</sup>Adjusted for child's gender and age, mother's education and household wealth

Review only

Table 3: Summary results of meta-analysis of associations of child factors and cognitive, motor and language developments, standardized scores

| Risk Factor                                         | Cognitive      |                                    |                 |                    | Motor          |                                    |                 |                    | Language       |                                    |                 |                    |
|-----------------------------------------------------|----------------|------------------------------------|-----------------|--------------------|----------------|------------------------------------|-----------------|--------------------|----------------|------------------------------------|-----------------|--------------------|
|                                                     | No. of studies | Adjusted <sup>1</sup> SMD (95% CI) | <i>p</i> -value | I <sup>2</sup> (%) | No. of studies | Adjusted <sup>1</sup> SMD (95% CI) | <i>p</i> -value | I <sup>2</sup> (%) | No. of studies | Adjusted <sup>1</sup> SMD (95% CI) | <i>p</i> -value | I <sup>2</sup> (%) |
| <b>Birth weight (g)</b>                             |                |                                    |                 |                    |                |                                    |                 |                    |                |                                    |                 |                    |
| Normal (≥2500 g)                                    |                | Reference                          |                 |                    |                | Reference                          |                 |                    |                | Reference                          |                 |                    |
| Low (<2500 g)                                       | 14             | -0.13 (-0.20, -0.07)               | < 0.01          | 51.0               | 15             | -0.14 (-0.23, -0.06)               | < 0.01          | 66.5               | 5              | -0.11 (-0.22, 0.00)                | 0.12            | 74.6               |
| Moderate low (2000-2500 g)                          | 14             | -0.07 (-0.12, -0.03)               | < 0.01          | 17.2               | 15             | -0.11 (-0.20, -0.02)               | 0.03            | 64.0               | 5              | -0.05 (-0.10, 0.01)                | 0.20            | 29.6               |
| Very low (<2000 g)                                  | 14             | -0.27 (-0.49, -0.07)               | 0.02            | 74.0               | 13             | -0.26 (-0.40, -0.12)               | < 0.01          | 74.9               | 5              | -0.28 (-0.60, 0.05)                | 0.17            | 81.1               |
| <b>Gestational age (g)<sup>2</sup></b>              |                |                                    |                 |                    |                |                                    |                 |                    |                |                                    |                 |                    |
| Term (≥37 weeks)                                    |                | Reference                          |                 |                    |                | Reference                          |                 |                    |                | Reference                          |                 |                    |
| Late preterm (34-37 weeks)                          | 8              | -0.21 (-0.39, -0.04)               | 0.04            | 69.8               | 8              | -0.14 (-0.33, 0.04)                | 0.17            | 74.5               | 5              | -0.05 (-0.23, 0.13)                | 0.64            | 72.1               |
| Early preterm (<34 weeks)                           | 8              | -0.16 (-0.34, 0.31)                | 0.15            | 53.5               | 7              | -0.26 (-0.53, 0.006)               | 0.10            | 65.0               | 4              | -0.20 (-0.55, 0.15)                | 0.35            | 75.4               |
| <b>Size for gestational age<sup>3</sup></b>         |                |                                    |                 |                    |                |                                    |                 |                    |                |                                    |                 |                    |
| AGA (≥10 percentile)                                |                | Reference                          |                 |                    |                | Reference                          |                 |                    |                | Reference                          |                 |                    |
| Moderate SGA (3-<10 percentile)                     | 8              | -0.05 (-0.11, 0.12)                | 0.16            | 0.0                | 9              | -0.01 (-0.10, 0.07)                | 0.77            | 36.6               | 4              | -0.06 (-0.18, 0.06)                | 0.40            | 29.4               |
| Severe SGA (<3 percentile)                          | 8              | -0.09 (-0.24, 0.07)                | 0.30            | 72.0               | 9              | 0.02 (-0.09, 0.12)                 | 0.78            | 37.4               | 4              | 0.03 (-0.13, 0.19)                 | 0.73            | 37.7               |
| <b>Gestational age and Size-for-gestational age</b> |                |                                    |                 |                    |                |                                    |                 |                    |                |                                    |                 |                    |
| Term-AGA                                            |                | Reference                          |                 |                    |                | Reference                          |                 |                    |                | Reference                          |                 |                    |
| Preterm-AGA                                         | 8              | -0.14 (-0.24, -0.05)               | 0.02            | 17.0               | 9              | -0.23 (-0.42, -0.03)               | 0.05            | 76.5               | 4              | -0.02 (-0.23, 0.19)                | 0.87            | 78.0               |
| Term-SGA                                            | 8              | -0.02 (-0.10, 0.06)                | 0.66            | 44.6               | 9              | -0.007 (-0.08, 0.06)               | 0.84            | 31.4               | 4              | -0.03 (-0.12, 0.06)                | 0.55            | 9.3                |
| Preterm-SGA                                         | 5              | -0.17 (-0.29, -0.05)               | 0.05            | 0.0                | 5              | -0.15 (-0.40, 0.09)                | 0.29            | 53.1               | 3              | n/a                                | n/a             | n/a                |
| <b>Exclusive breastfeeding</b>                      |                |                                    |                 |                    |                |                                    |                 |                    |                |                                    |                 |                    |
| Yes                                                 |                | Reference                          |                 |                    |                | Reference                          |                 |                    |                | Reference                          |                 |                    |
| No                                                  | 4              | -0.02 (-0.08, 0.04)                | 0.60            | 0.0                | 4              | -0.05 (-0.13, 0.04)                | 0.36            | 16.4               | 3              | n/a                                | n/a             | n/a                |

| Risk Factor                         | Cognitive      |                                    |                 |                    | Motor          |                                    |                 |                    | Language       |                                    |                 |                    |
|-------------------------------------|----------------|------------------------------------|-----------------|--------------------|----------------|------------------------------------|-----------------|--------------------|----------------|------------------------------------|-----------------|--------------------|
|                                     | No. of studies | Adjusted <sup>1</sup> SMD (95% CI) | <i>p</i> -value | I <sup>2</sup> (%) | No. of studies | Adjusted <sup>1</sup> SMD (95% CI) | <i>p</i> -value | I <sup>2</sup> (%) | No. of studies | Adjusted <sup>1</sup> SMD (95% CI) | <i>p</i> -value | I <sup>2</sup> (%) |
| <b>Child hemoglobin level (g/L)</b> |                |                                    |                 |                    |                |                                    |                 |                    |                |                                    |                 |                    |
| Normal (≥110 g/L)                   |                | Reference                          |                 |                    |                | Reference                          |                 |                    |                | Reference                          |                 |                    |
| Mild anemia (100-109 g/L)           | 9              | -0.06 (-0.13, 0.01)                | 0.14            | 27.7               | 9              | -0.03 (-0.13, 0.07)                | 0.54            | 51.2               | 3              | n/a                                | n/a             | n/a                |
| Moderate anemia (70-99 g/L)         | 9              | -0.11 (-0.12, -0.10)               | < 0.01          | 0.0                | 9              | -0.18 (-0.28, -0.09)               | < 0.01          | 49.0               | 3              | n/a                                | n/a             | n/a                |
| <b>Access to clean water</b>        |                |                                    |                 |                    |                |                                    |                 |                    |                |                                    |                 |                    |
| Yes                                 |                | Reference                          |                 |                    |                | Reference                          |                 |                    |                | Reference                          |                 |                    |
| No                                  | 8              | -0.10 (-0.12, -0.09)               | < 0.01          | 0.0                | 8              | -0.07 (-0.16, 0.01)                | 0.14            | 71.0               | 4              | -0.15 (-0.35, 0.05)                | 0.23            | 82.5               |
| <b>Access to sanitation</b>         |                |                                    |                 |                    |                |                                    |                 |                    |                |                                    |                 |                    |
| Yes                                 |                | Reference                          |                 |                    |                | Reference                          |                 |                    |                | Reference                          |                 |                    |
| No                                  | 8              | -0.13 (-0.18, -0.07)               | < 0.01          | 47.5               | 8              | -0.10 (-0.19, -0.01)               | 0.05            | 82.8               | 4              | -0.12 (-0.27, 0.03)                | 0.21            | 92.4               |
| <b>Diarrhoea</b>                    |                |                                    |                 |                    |                |                                    |                 |                    |                |                                    |                 |                    |
| Yes                                 | 5              | -0.02 (-0.16, 0.13)                | 0.84            | 66.8               | 5              | -0.02 (-0.14, 0.09)                | 0.71            | 62.8               | 2              | n/a                                | n/a             | n/a                |
| No                                  |                | Reference                          |                 |                    |                | Reference                          |                 |                    |                | Reference                          |                 |                    |

<sup>1</sup>Adjusted for child’s gender and age, mother’s education and household wealth

<sup>2</sup>Adjusted for small for gestational age

<sup>3</sup>Adjusted for gestational age

AGA: Appropriate for Gestational Age

SGA: Small for Gestational Age

Only

## References

1. Black MM, Walker SP, Fernald LC, et al. Early childhood development coming of age: science through the life course. *Lancet* 2017;389(10064):77-90. doi: 10.1016/S0140-6736(16)31389-7
2. Lu C, Black MM, Richter LM. Risk of poor development in young children in low-income and middle-income countries: an estimation and analysis at the global, regional, and country level. *Lancet Glob Health* 2016;4(12):e916-e22. doi: 10.1016/S2214-109X(16)30266-2
3. McCoy DC, Peet ED, Ezzati M, et al. Early Childhood Developmental Status in Low- and Middle-Income Countries: National, Regional, and Global Prevalence Estimates Using Predictive Modeling. *PLoS Med* 2016;13(6):e1002034. doi: 10.1371/journal.pmed.1002034
4. Knudsen EI. Sensitive periods in the development of the brain and behavior. *J Cogn Neurosci* 2004;16(8):1412-25. doi: 10.1162/0898929042304796
5. Shonkoff JP, Boyce WT, McEwen BS. Neuroscience, molecular biology, and the childhood roots of health disparities: building a new framework for health promotion and disease prevention. *JAMA* 2009;301(21):2252-9. doi: 10.1001/jama.2009.754
6. Peet ED, McCoy DC, Danaei G, et al. Early Childhood Development and Schooling Attainment: Longitudinal Evidence from British, Finnish and Philippine Birth Cohorts. *PLoS One* 2015;10(9):e0137219. doi: 10.1371/journal.pone.0137219
7. Case A, Paxson C. Stature and status: Height, ability, and labor market outcomes. *J Polit Econ* 2008;116(3):499-532. doi: 10.1086/589524
8. Engle PL, Black MM, Behrman JR, et al. Strategies to avoid the loss of developmental potential in more than 200 million children in the developing world. *Lancet* 2007;369(9557):229-42. doi: 10.1016/S0140-6736(07)60112-3
9. Grantham-McGregor S, Cheung YB, Cueto S, et al. Developmental potential in the first 5 years for children in developing countries. *Lancet* 2007;369(9555):60-70. doi: 10.1016/S0140-6736(07)60032-4
10. Fink G, Peet E, Danaei G, et al. Schooling and wage income losses due to early-childhood growth faltering in developing countries: national, regional, and global estimates. *Am J Clin Nutr* 2016;104(1):104-12. doi: 10.3945/ajcn.115.123968
11. UN. The 2030 Agenda for Sustainable Development. In: United Nations, ed. New York: United Nations, 2015.
12. Danaei G, Andrews KG, Sudfeld CR, et al. Risk Factors for Childhood Stunting in 137 Developing Countries: A Comparative Risk Assessment Analysis at Global, Regional, and Country Levels. *PLoS Med* 2016;13(11):e1002164. doi: 10.1371/journal.pmed.1002164
13. Walker SP, Wachs TD, Gardner JM, et al. Child development: risk factors for adverse outcomes in developing countries. *Lancet* 2007;369(9556):145-57. doi: 10.1016/S0140-6736(07)60076-2
14. Walker SP, Wachs TD, Grantham-McGregor S, et al. Inequality in early childhood: risk and protective factors for early child development. *Lancet* 2011;378(9799):1325-38. doi: 10.1016/S0140-6736(11)60555-2
15. Prado EL, Abbeddou S, Yakes Jimenez E, et al. Effects of an intervention on infant growth and development: evidence for different mechanisms at work. *Matern Child Nutr* 2016 doi: 10.1111/mcn.12314
16. Sudfeld CR, McCoy DC, Danaei G, et al. Linear growth and child development in low- and middle-income countries: a meta-analysis. *Pediatrics* 2015;135(5):e1266-75. doi: 10.1542/peds.2014-3111
17. World Health Organization. Nurturing care for early childhood development: a framework for helping children survive and thrive to transform health and human potential 2018.
18. DerSimonian R, Laird N. Meta-analysis in clinical trials. *Control Clin Trials* 1986;7(3):177-88.

19. Black MM, Baqui AH, Zaman K, et al. Iron and zinc supplementation promote motor development and exploratory behavior among Bangladeshi infants. *Am J Clin Nutr* 2004;80(4):903-10.
20. Tofail F, Persson LA, El Arifeen S, et al. Effects of prenatal food and micronutrient supplementation on infant development: a randomized trial from the Maternal and Infant Nutrition Interventions, Matlab (MINIMat) study. *Am J Clin Nutr* 2008;87(3):704-11.
21. Tofail F, Hamadani JD, Ahmed AZ, et al. The mental development and behavior of low-birth-weight Bangladeshi infants from an urban low-income community. *Eur J Clin Nutr* 2012;66(2):237-43.
22. Taneja S, Bhandari N, Bahl R, et al. Impact of zinc supplementation on mental and psychomotor scores of children aged 12 to 18 months: a randomized, double-blind trial. *J Pediatr* 2005;146(4):506-11.
23. Kvestad I, Taneja S, Hysing M, et al. Diarrhea, stimulation and growth predict neurodevelopment in young North Indian children. *PLoS One* 2015;10(3):e0121743. doi: 10.1371/journal.pone.0121743
24. Yousafzai AK, Rasheed MA, Rizvi A, et al. Effect of integrated responsive stimulation and nutrition interventions in the Lady Health Worker programme in Pakistan on child development, growth, and health outcomes: a cluster-randomised factorial effectiveness trial. *Lancet* 2014;384(9950):1282-93. doi: 10.1016/S0140-6736(14)60455-4
25. Duazo P, Avila J, Kuzawa CW. Breastfeeding and later psychosocial development in the Philippines. *Am J Hum Biol* 2010;22(6):725-30.
26. Villegas L, McGready R, Htway M, et al. Chloroquine prophylaxis against vivax malaria in pregnancy: a randomized, double-blind, placebo-controlled trial. *Trop Med Int Health* 2007;12(2):209-18.
27. Shapiro RL, Kitch D, Ogwu A, et al. HIV transmission and 24-month survival in a randomized trial of HAART to prevent MTCT during pregnancy and breastfeeding in Botswana. *AIDS* 2013;27(12):1911-20.
28. Bogale A, Abebe Y, Stoecker BJ, et al. Iodine status and cognitive function of women and their five year-old children in rural Sidama, southern Ethiopia. *East Afr J Public Health* 2009;6(3):296-9.
29. Gladstone M, White S, Kafulafula G, et al. Post-neonatal mortality, morbidity, and developmental outcome after ultrasound-dated preterm birth in rural Malawi: a community-based cohort study. *PLoS Med* 2011;8(11):e1001121.
30. McDonald CM, Manji KP, Kupka R, et al. Stunting and wasting are associated with poorer psychomotor and mental development in HIV-exposed Tanzanian infants. *J Nutr* 2013;143(2):204-14. doi: 10.3945/jn.112.168682
31. Manji KP, McDonald CM, Kupka R, et al. Effect of multivitamin supplementation on the neurodevelopment of HIV-exposed Tanzanian infants: a randomized, double-blind, placebo-controlled clinical trial. *J Trop Pediatr* 2014;60(4):279-86. doi: 10.1093/tropej/fmu011
32. Sudfeld CR, McCoy DC, Fink G, et al. Malnutrition and Its Determinants Are Associated with Suboptimal Cognitive, Communication, and Motor Development in Tanzanian Children. *J Nutr* 2015;145(12):2705-14. doi: 10.3945/jn.115.215996
33. Locks LM, Manji KP, McDonald CM, et al. Effect of zinc and multivitamin supplementation on the growth of Tanzanian children aged 6-84 wk: a randomized, placebo-controlled, double-blind trial. *Am J Clin Nutr* 2016 doi: 10.3945/ajcn.115.120055
34. Santos IS, Barros AJ, Matijasevich A, et al. Cohort profile: the 2004 Pelotas (Brazil) birth cohort study. *Int J Epidemiol* 2011;40(6):1461-8. doi: 10.1093/ije/dyq130
35. Santos DN, Assis AM, Bastos AC, et al. Determinants of cognitive function in childhood: a cohort study in a middle income context. *BMC Public Health* 2008;8:202. doi: 10.1186/1471-2458-8-202
36. Fernald LC, Hidrobo M. Effect of Ecuador's cash transfer program (Bono de Desarrollo Humano) on child development in infants and toddlers: a randomized effectiveness trial. *Soc Sci Med* 2011;72(9):1437-46.

- 1
- 2
- 3
- 4 37. Handal AJ, Harlow SD, Breilh J, et al. Occupational exposure to pesticides during pregnancy and
- 5 neurobehavioral development of infants and toddlers. *Epidemiology* 2008;19(6):851-9. doi:
- 6 10.1097/EDE.0b013e318187cc5d
- 7 38. Braun JM, Hoffman E, Schwartz J, et al. Assessing windows of susceptibility to lead-induced cognitive
- 8 deficits in Mexican children. *Neurotoxicology* 2012;33(5):1040-7.
- 9 39. Akman M, Cebeci D, Okur V, et al. The effects of iron deficiency on infants' developmental test
- 10 performance. *Acta Paediatr* 2004;93(10):1391-6.
- 11 40. Patra K, Greene MM, Patel AL, et al. Maternal Education Level Predicts Cognitive, Language, and
- 12 Motor Outcome in Preterm Infants in the Second Year of Life. *Am J Perinatol* 2016;33(8):738-44.
- 13 doi: 10.1055/s-0036-1572532
- 14 41. Vollmer S, Bommer C, Krishna A, et al. The association of parental education with childhood
- 15 undernutrition in low- and middle-income countries: comparing the role of paternal and
- 16 maternal education. *Int J Epidemiol* 2016 doi: 10.1093/ije/dyw133
- 17 42. Pancsofar N, Vernon-Feagans L, The Family Life Project I. Fathers' Early Contributions to Children's
- 18 Language Development in Families from Low-income Rural Communities. *Early Child Res Q*
- 19 2010;25(4):450-63. doi: 10.1016/j.ecresq.2010.02.001
- 20 43. Carneiro P, Meghir C, Parey M. Maternal education, home environments, and the development of
- 21 children and adolescents *Journal of the European Economic Association* 2013;11:123-60. doi:
- 22 10.1111/j.1542-4774.2012.01096.x
- 23 44. Fein SB, Labiner-Wolfe J, Scanlon KS, et al. Selected complementary feeding practices and their
- 24 association with maternal education. *Pediatrics* 2008;122 Suppl 2:S91-7. doi:
- 25 10.1542/peds.2008-1315l
- 26 45. Simkhada B, Teijlingen ER, Porter M, et al. Factors affecting the utilization of antenatal care in
- 27 developing countries: systematic review of the literature. *J Adv Nurs* 2008;61(3):244-60. doi:
- 28 10.1111/j.1365-2648.2007.04532.x
- 29 46. Di Cesare M, Sabates R, Lewin KM. A double prevention: How maternal education can affect
- 30 maternal mental health, child health and child cognitive development. *2013* 2013;4(3):14. doi:
- 31 10.14301/llcs.v4i3.233 [published Online First: 2013-10-28]
- 32 47. Makoka D, Masibo PK. Is there a threshold level of maternal education sufficient to reduce child
- 33 undernutrition? Evidence from Malawi, Tanzania and Zimbabwe. *BMC Pediatr* 2015;15:96. doi:
- 34 10.1186/s12887-015-0406-8
- 35 48. de Souza N, Sardessai V, Joshi K, et al. The determinants of compliance with an early intervention
- 36 programme for high-risk babies in India. *Child Care Health Dev* 2006;32(1):63-72. doi:
- 37 10.1111/j.1365-2214.2006.00576.x
- 38 49. Barros AJ, Matijasevich A, Santos IS, et al. Child development in a birth cohort: effect of child
- 39 stimulation is stronger in less educated mothers. *Int J Epidemiol* 2010;39(1):285-94. doi:
- 40 10.1093/ije/dyp272
- 41 50. de Jong M, Verhoeven M, van Baar AL. School outcome, cognitive functioning, and behaviour
- 42 problems in moderate and late preterm children and adults: a review. *Semin Fetal Neonatal*
- 43 *Med* 2012;17(3):163-9. doi: 10.1016/j.siny.2012.02.003
- 44 51. McGowan JE, Alderdice FA, Holmes VA, et al. Early childhood development of late-preterm infants: a
- 45 systematic review. *Pediatrics* 2011;127(6):1111-24. doi: 10.1542/peds.2010-2257
- 46 52. Aarnoudse-Moens CS, Weisglas-Kuperus N, van Goudoever JB, et al. Meta-analysis of
- 47 neurobehavioral outcomes in very preterm and/or very low birth weight children. *Pediatrics*
- 48 2009;124(2):717-28. doi: 10.1542/peds.2008-2816
- 49 53. de Kieviet JF, Piek JP, Aarnoudse-Moens CS, et al. Motor development in very preterm and very low-
- 50 birth-weight children from birth to adolescence: a meta-analysis. *JAMA* 2009;302(20):2235-42.
- 51 doi: 10.1001/jama.2009.1708
- 52
- 53
- 54
- 55
- 56
- 57
- 58
- 59
- 60

- 1  
2  
3 54. Mulder H, Pitchford NJ, Hagger MS, et al. Development of executive function and attention in  
4 preterm children: a systematic review. *Dev Neuropsychol* 2009;34(4):393-421. doi:  
5 10.1080/87565640902964524  
6  
7 55. Geldof CJ, van Wassenaer AG, de Kieviet JF, et al. Visual perception and visual-motor integration in  
8 very preterm and/or very low birth weight children: a meta-analysis. *Res Dev Disabil*  
9 2012;33(2):726-36. doi: 10.1016/j.ridd.2011.08.025  
10  
11 56. Counsell SJ, Boardman JP. Differential brain growth in the infant born preterm: current knowledge  
12 and future developments from brain imaging. *Semin Fetal Neonatal Med* 2005;10(5):403-10.  
13 doi: 10.1016/j.siny.2005.05.003  
14  
15 57. Finken MJ, Dekker FW, de Zegher F, et al. Long-term height gain of prematurely born children with  
16 neonatal growth restraint: parallelism with the growth pattern of short children born small for  
17 gestational age. *Pediatrics* 2006;118(2):640-3. doi: 10.1542/peds.2006-0103  
18  
19 58. de Kieviet JF, Zoetebier L, van Elburg RM, et al. Brain development of very preterm and very low-  
20 birthweight children in childhood and adolescence: a meta-analysis. *Dev Med Child Neurol*  
21 2012;54(4):313-23. doi: 10.1111/j.1469-8749.2011.04216.x  
22  
23 59. Mikkola K, Ritari N, Tommiska V, et al. Neurodevelopmental outcome at 5 years of age of a national  
24 cohort of extremely low birth weight infants who were born in 1996-1997. *Pediatrics*  
25 2005;116(6):1391-400. doi: 10.1542/peds.2005-0171  
26  
27 60. Blencowe H, Cousens S, Oestergaard MZ, et al. National, regional, and worldwide estimates of  
28 preterm birth rates in the year 2010 with time trends since 1990 for selected countries: a  
29 systematic analysis and implications. *Lancet* 2012;379(9832):2162-72.  
30  
31 61. Simmons LE, Rubens CE, Darmstadt GL, et al. Preventing preterm birth and neonatal mortality:  
32 exploring the epidemiology, causes, and interventions. *Semin Perinatol* 2010;34(6):408-15. doi:  
33 10.1053/j.semperi.2010.09.005  
34  
35 62. Guralnick MJ. Preventive interventions for preterm children: effectiveness and developmental  
36 mechanisms. *J Dev Behav Pediatr* 2012;33(4):352-64. doi: 10.1097/DBP.0b013e31824eaa3c  
37  
38 63. Nogel SC, Deiters L, Stemmler M, et al. Preterm small-for-gestational age children: predictive role of  
39 gestational age for mental development at the age of 2 years. *Brain Dev* 2015;37(4):394-401.  
40 doi: 10.1016/j.braindev.2014.06.012  
41  
42 64. Bickle Graz M, Tolsa JF, Fischer Fumeaux CJ. Being Small for Gestational Age: Does it Matter for the  
43 Neurodevelopment of Premature Infants? A Cohort Study. *PLoS One* 2015;10(5):e0125769. doi:  
44 10.1371/journal.pone.0125769  
45  
46 65. Tanis JC, van der Ree MH, Roze E, et al. Functional outcome of very preterm-born and small-for-  
47 gestational-age children at school age. *Pediatr Res* 2012;72(6):641-8. doi: 10.1038/pr.2012.130  
48  
49 66. Arcangeli T, Thilaganathan B, Hooper R, et al. Neurodevelopmental delay in small babies at term: a  
50 systematic review. *Ultrasound Obstet Gynecol* 2012;40(3):267-75. doi: 10.1002/uog.11112  
51  
52 67. Savchev S, Sanz-Cortes M, Cruz-Martinez R, et al. Neurodevelopmental outcome of full-term small-  
53 for-gestational-age infants with normal placental function. *Ultrasound Obstet Gynecol*  
54 2013;42(2):201-6. doi: 10.1002/uog.12391  
55  
56 68. Brandt I, Sticker EJ, Lentze MJ. Catch-up growth of head circumference of very low birth weight,  
57 small for gestational age preterm infants and mental development to adulthood. *J Pediatr*  
58 2003;142(5):463-8. doi: 10.1067/mpd.2003.149  
59  
60 69. McCowan L, Horgan RP. Risk factors for small for gestational age infants. *Best Pract Res Clin Obstet*  
61 *Gynaecol* 2009;23(6):779-93. doi: 10.1016/j.bpobgyn.2009.06.003  
62  
63 70. Lozoff B. Iron deficiency and child development. *Food Nutr Bull* 2007;28(4 Suppl):S560-71.  
64  
65 71. McLean E, Cogswell M, Egli I, et al. Worldwide prevalence of anaemia, WHO Vitamin and Mineral  
66 Nutrition Information System, 1993-2005. *Public Health Nutr* 2009;12(4):444-54. doi:  
67 10.1017/S1368980008002401

- 1  
2  
3 72. Beard JL, Felt B, Schallert T, et al. Moderate iron deficiency in infancy: biology and behavior in young  
4 rats. *Behav Brain Res* 2006;170(2):224-32. doi: 10.1016/j.bbr.2006.02.024  
5  
6 73. Pasricha SR, Hayes E, Kalumba K, et al. Effect of daily iron supplementation on health in children  
7 aged 4-23 months: a systematic review and meta-analysis of randomised controlled trials.  
8 *Lancet Glob Health* 2013;1(2):e77-86. doi: 10.1016/S2214-109X(13)70046-9  
9  
10 74. Sachdev H, Gera T, Nestel P. Effect of iron supplementation on mental and motor development in  
11 children: systematic review of randomised controlled trials. *Public Health Nutr* 2005;8(2):117-32.  
12  
13 75. Koura GK, Ouedraogo S, Le Port A, et al. Anaemia during pregnancy: impact on birth outcome and  
14 infant haemoglobin level during the first 18 months of life. *Trop Med Int Health* 2012;17(3):283-  
15 91. doi: 10.1111/j.1365-3156.2011.02932.x  
16  
17 76. Anderson JW, Johnstone BM, Remley DT. Breast-feeding and cognitive development: a meta-  
18 analysis. *Am J Clin Nutr* 1999;70(4):525-35.  
19  
20 77. Horta BL, Loret de Mola C, Victora CG. Breastfeeding and intelligence: a systematic review and meta-  
21 analysis. *Acta Paediatr* 2015;104(467):14-9. doi: 10.1111/apa.13139  
22  
23 78. Walfisch A, Sermer C, Cressman A, et al. Breast milk and cognitive development--the role of  
24 confounders: a systematic review. *BMJ Open* 2013;3(8):e003259. doi: 10.1136/bmjopen-2013-  
25 003259  
26  
27 79. Ngure FM, Reid BM, Humphrey JH, et al. Water, sanitation, and hygiene (WASH), environmental  
28 enteropathy, nutrition, and early child development: making the links. *Ann N Y Acad Sci*  
29 2014;1308:118-28. doi: 10.1111/nyas.12330  
30  
31 80. Niehaus MD, Moore SR, Patrick PD, et al. Early childhood diarrhea is associated with diminished  
32 cognitive function 4 to 7 years later in children in a northeast Brazilian shantytown. *Am J Trop*  
33 *Med Hyg* 2002;66(5):590-3.  
34  
35 81. Petri WA, Jr., Miller M, Binder HJ, et al. Enteric infections, diarrhea, and their impact on function and  
36 development. *J Clin Invest* 2008;118(4):1277-90. doi: 10.1172/JCI34005  
37  
38 82. Aboud FE, Yousafzai AK. Global health and development in early childhood. *Annu Rev Psychol*  
39 2015;66:433-57. doi: 10.1146/annurev-psych-010814-015128  
40  
41  
42  
43  
44  
45  
46  
47  
48  
49  
50  
51  
52  
53  
54  
55  
56  
57  
58  
59  
60



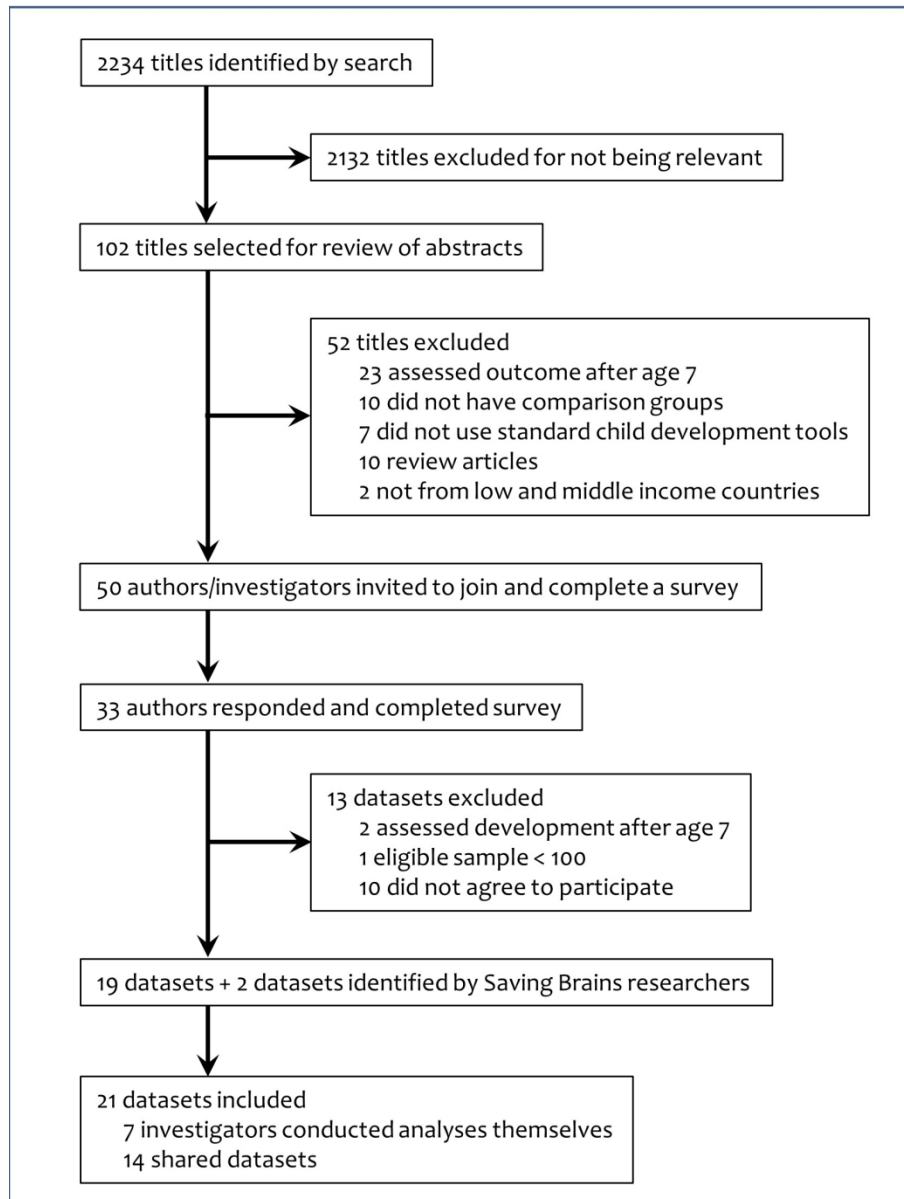

Figure 1: flow chart of study selection

142x187mm (300 x 300 DPI)

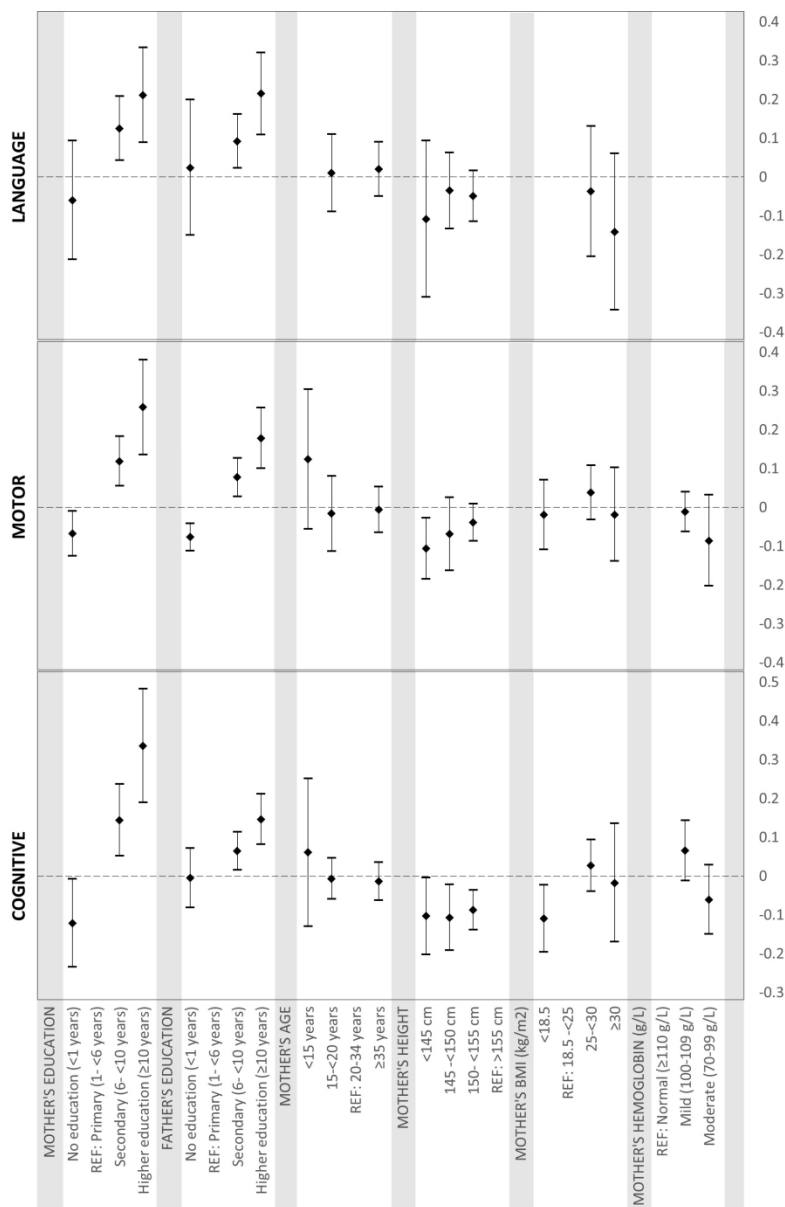

Figure 2: Pooled estimates of association between maternal factors and development

157x237mm (300 x 300 DPI)

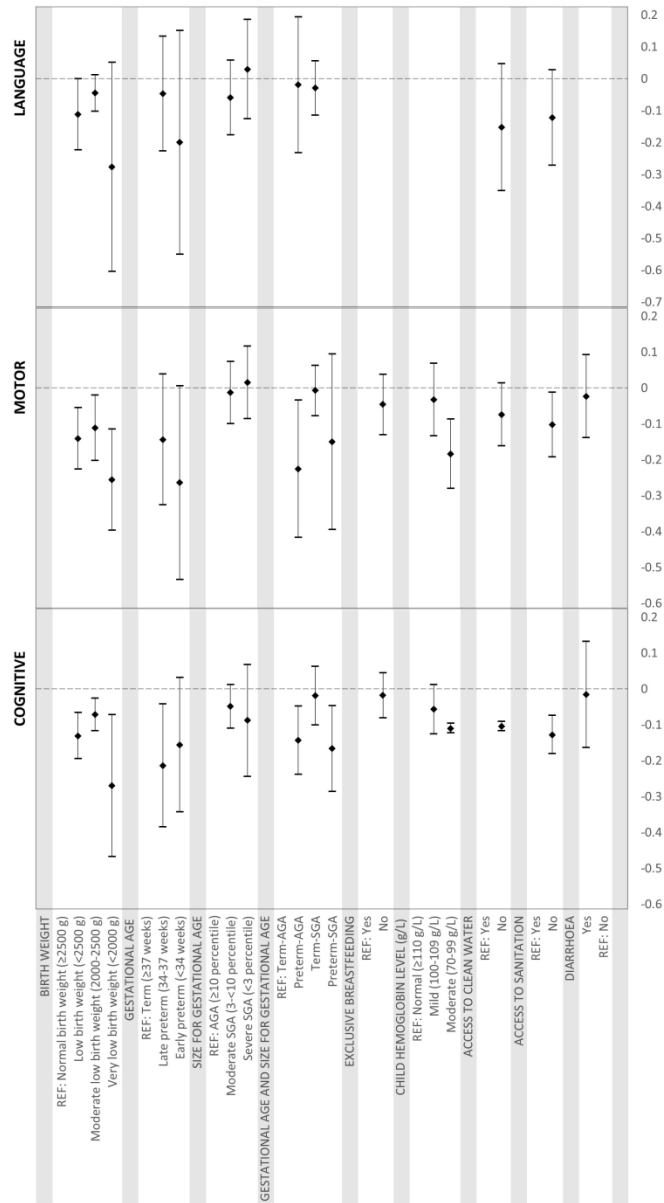

Figure 3: Pooled estimates of association between child factors and development.

157x284mm (300 x 300 DPI)

## Appendix 1: Search terms

("child"[MeSH] OR "infant"[MeSH]) AND ("child development"[MeSH] OR "cognition"[MeSH] OR "psychomotor disorders"[MeSH] OR "psychomotor performance"[MeSH] OR "motor skills"[MeSH] OR "intelligence"[MeSH] OR "IQ"[All Fields] OR "executive function"[MeSH] OR "attention"[MeSH] OR "memory"[MeSH] OR "learning"[MeSH] OR "education"[MeSH] OR "reading"[MeSH] OR "mathematics"[MeSH] OR "learning disorders"[MeSH] OR "aptitude tests"[MeSH] OR "language tests"[MeSH] OR "mental health"[MeSH] OR "child behavior"[MeSH] OR "emotional intelligence"[MeSH] OR "emotions"[MeSH] OR "temperament"[MeSH] OR "self concept"[MeSH] OR "self efficacy"[MeSH] OR "mental competency"[MeSH] OR "aggression"[MeSH]) AND ("preterm"[All Fields] OR "low birth weight"[All Fields] OR "maternal height" OR "maternal underweight" OR "malaria" OR "birth spacing" OR "Teen pregnancy" OR "anemia" or "hemoglobin" OR "HIV" OR "iron supplement" OR "iron deficiency" OR "childhood diarrhea" OR "HIV" OR "zinc" OR "iodine" OR "sanitation" OR "clean water" OR "breastfeeding" OR "hookworms" ) AND ("Armenia"[All Fields] OR "Azerbaijan"[All Fields] OR "Georgia"[All Fields] OR "Kazakhstan"[All Fields] OR "Kyrgyzstan"[All Fields] OR "Mongolia"[All Fields] OR "Tajikistan"[All Fields] OR "Turkmenistan"[All Fields] OR "Uzbekistan"[All Fields] OR "Afghanistan"[All Fields] OR "Bangladesh"[All Fields] OR "Bhutan"[All Fields] OR "India"[All Fields] OR "Nepal"[All Fields] OR "Pakistan"[All Fields] OR "Cambodia"[All Fields] OR "Indonesia"[All Fields] OR "Lao People's Democratic Republic"[All Fields] OR "Malaysia"[All Fields] OR "Maldives"[All Fields] OR "Mauritius"[All Fields] OR "Mayotte"[All Fields] OR "Myanmar"[All Fields] OR "Philippines"[All Fields] OR "Seychelles"[All Fields] OR "Sri Lanka"[All Fields] OR "Thailand"[All Fields] OR "Viet Nam"[All Fields] OR "Anguilla"[All Fields] OR "Antigua and Barbuda"[All Fields] OR "Aruba"[All Fields] OR "Bahamas"[All Fields] OR "Barbados"[All Fields] OR "Belize"[All Fields] OR "Bermuda"[All Fields] OR "British Virgin Islands"[All Fields] OR "Cayman Islands"[All Fields] OR "Cuba"[All Fields] OR "Turks and Caicos Islands"[All Fields] OR "Bolivia"[All Fields] OR "Ecuador"[All Fields] OR "Peru"[All Fields] OR "Colombia"[All Fields] OR "Costa Rica"[All Fields] OR "El Salvador"[All Fields] OR "Guatemala"[All Fields] OR "Honduras"[All Fields] OR "Mexico"[All Fields] OR "Nicaragua"[All Fields] OR "Panama"[All Fields] OR "Venezuela"[All Fields] OR "Argentina"[All Fields] OR "Chile"[All Fields] OR "Falkland Islands"[All Fields] OR "Malvinas"[All Fields] OR "Uruguay"[All Fields] OR "Brazil"[All Fields] OR "Paraguay"[All Fields] OR "Algeria"[All Fields] OR "Bahrain"[All Fields] OR "Egypt"[All Fields] OR "Iran"[All Fields] OR "Iraq"[All Fields] OR "Jordan"[All Fields] OR "Kuwait"[All Fields] OR "Lebanon"[All Fields] OR "Libyan Arab Jamahiriya"[All Fields] OR "Morocco"[All Fields] OR "Occupied Palestinian Territory"[All Fields] OR "Oman"[All Fields] OR "Qatar"[All Fields] OR "Saudi Arabia"[All Fields] OR "Syrian Arab Republic"[All Fields] OR "Tunisia"[All Fields] OR "Turkey"[All Fields] OR "United Arab Emirates"[All Fields] OR "Western Sahara"[All Fields] OR "Yemen"[All Fields] OR "American Samoa"[All Fields] OR "Cook Islands"[All Fields] OR "Fiji"[All Fields] OR "French Polynesia"[All Fields] OR "Guam"[All Fields] OR "Kiribati"[All Fields] OR "Marshall Islands"[All Fields] OR "Micronesia"[All Fields] OR "Nauru"[All Fields] OR "New Caledonia"[All Fields] OR "Niue"[All Fields] OR "Northern Mariana Islands"[All Fields] OR "Palau"[All Fields] OR "Papua New Guinea"[All Fields] OR "Pitcairn"[All Fields] OR "Samoa"[All Fields] OR "Solomon Islands"[All Fields] OR "Tokelau"[All Fields] OR "Tonga"[All Fields] OR "Tuvalu"[All Fields] OR "Vanuatu"[All Fields] OR "Wallis and Futuna Islands"[All Fields] OR "Angola"[All Fields] OR "Central African Republic"[All Fields] OR

1  
2  
3 "Congo"[All Fields] OR "Democratic Republic of the Congo"[All Fields] OR "Equatorial  
4 Guinea"[All Fields] OR "Gabon"[All Fields] OR "Burundi"[All Fields] OR "Comoros"[All  
5 Fields] OR "Djibouti"[All Fields] OR "Eritrea"[All Fields] OR "Ethiopia"[All Fields] OR  
6 "Kenya"[All Fields] OR "Madagascar"[All Fields] OR "Malawi"[All Fields] OR  
7 "Mozambique"[All Fields] OR "Rwanda"[All Fields] OR "Somalia"[All Fields] OR "Sudan"[All  
8 Fields] OR "Uganda"[All Fields] OR "United Republic of Tanzania"[All Fields] OR  
9 "Zambia"[All Fields] OR "Botswana"[All Fields] OR "Lesotho"[All Fields] OR "Namibia"[All  
10 Fields] OR "South Africa"[All Fields] OR "Swaziland"[All Fields] OR "Zimbabwe"[All Fields]  
11 OR "Benin"[All Fields] OR "Burkina Faso"[All Fields] OR "Cameroon"[All Fields] OR "Cape  
12 Verde"[All Fields] OR "Chad"[All Fields] OR "Cote d'Ivoire"[All Fields] OR "Gambia"[All  
13 Fields] OR "Ghana"[All Fields] OR "Guinea"[All Fields] OR "Guinea-Bissau"[All Fields] OR  
14 "Liberia"[All Fields] OR "Mali"[All Fields] OR "Mauritania"[All Fields] OR "Niger"[All Fields]  
15 OR "Nigeria"[All Fields] OR "Saint Helena"[All Fields] OR "Sao Tome and Principe"[All  
16 Fields] OR "Senegal"[All Fields] OR "Sierra Leone"[All Fields] OR "Togo"[All Fields]  
17  
18  
19  
20  
21  
22  
23  
24  
25  
26  
27  
28  
29  
30  
31  
32  
33  
34  
35  
36  
37  
38  
39  
40  
41  
42  
43  
44  
45  
46  
47  
48  
49  
50  
51  
52  
53  
54  
55  
56  
57  
58  
59  
60

## Appendix 2: Forest plots

|                                                                                                                                |    |
|--------------------------------------------------------------------------------------------------------------------------------|----|
| Figure 1: Association between low birth weight (LBW) and (reference: normal birth weight) and cognitive development. ....      | 7  |
| Figure 2: Association between Moderately low birth Weight (reference, normal birth weight) and cognitive development. ....     | 8  |
| Figure 3: Association between very low Birth weight (reference: normal birth weight)) and cognitive development. ....          | 9  |
| Figure 4: Association between child mild anemia (reference: no anemia) and cognitive development. ...                          | 10 |
| Figure 5: Association between child moderate anemia (reference: no anemia) and cognitive development. ....                     | 11 |
| Figure 6: Association between lack of access to clean water (reference: access to clean water) and cognitive development. .... | 12 |
| Figure 7: Association between lack of access to sanitation (reference: access to sanitation) and cognitive development. ....   | 13 |
| Figure 8: Association between preterm-AGA (reference: term-AGA) and cognitive development. ....                                | 14 |
| Figure 9: Association between term-SGA (reference: term-AGA) and cognitive development. ....                                   | 15 |
| Figure 10: Association between preterm- SGA (reference: term-AGA) and cognitive development. ....                              | 16 |
| Figure 11: Association between late preterm birth, 34-37 weeks (reference: term) and cognitive development. ....               | 17 |
| Figure 12: Association between early preterm birth, < 34 weeks (reference: term) and cognitive development. ....               | 18 |
| Figure 13: Association between moderate SGA (reference: AGA) and cognitive development. ....                                   | 19 |
| Figure 14: Association between severe SGA (reference: AGA) and cognitive development. ....                                     | 20 |
| Figure 15: Association between low birth weight (reference: normal birth weight) and motor development. ....                   | 21 |
| Figure 16: Association between moderately low birth weight (reference: normal birth weight) and motor development. ....        | 22 |
| Figure 17: Association between very low birth weight (reference: normal birth weight) and motor development. ....              | 23 |
| Figure 18: Association between child mild anemia (reference: no anemia) and motor development. ....                            | 24 |
| Figure 19: Association between child moderate anemia (reference: no anemia) and motor development. ....                        | 25 |
| Figure 20: Association between lack of access to clean water (reference: access to clean water) and motor development. ....    | 26 |
| Figure 21: Association between lack of access to sanitation (reference: access to sanitation) and motor development. ....      | 27 |
| Figure 22: Association between preterm-AGA (reference: term-AGA) and motor development. ....                                   | 28 |
| Figure 23: Association between term-SGA (reference: term-AGA) and motor development. ....                                      | 29 |
| Figure 24: Association between preterm-SGA (reference: term-AGA) and motor development. ....                                   | 30 |
| Figure 25: Association between late preterm birth, 34-37 weeks (reference: term) and motor development. ....                   | 31 |

|    |                                                                                                       |    |
|----|-------------------------------------------------------------------------------------------------------|----|
| 1  |                                                                                                       |    |
| 2  |                                                                                                       |    |
| 3  | Figure 26: Association between early preterm birth, < 34 weeks (reference: term) and motor            |    |
| 4  | development.....                                                                                      | 32 |
| 5  | Figure 27: Association between moderate SGA (reference: AGA) and motor development.....               | 33 |
| 6  | Figure 28: Association between severe SGA (reference: AGA) and motor development.....                 | 34 |
| 7  | Figure 29: Association between low birth weight (LBW) and (reference: normal birth weight) and        |    |
| 8  | language development. ....                                                                            | 35 |
| 9  | Figure 30: Association between moderately low birth weight and (reference: normal birth weight) and   |    |
| 10 | language development. ....                                                                            | 36 |
| 11 | Figure 31: Association between very low birth weight and (reference: normal birth weight) and         |    |
| 12 | language development. ....                                                                            | 37 |
| 13 | Figure 32: Association between lack of access to clean water (reference: access to clean water) and   |    |
| 14 | language development. ....                                                                            | 38 |
| 15 | Figure 33: Association between lack of access to sanitation (reference: access to sanitation) and     |    |
| 16 | language development. ....                                                                            | 39 |
| 17 | Figure 34: Association between preterm-AGA (reference: term-AGA) and language development.....        | 40 |
| 18 | Figure 35: Association between term-SGA (reference: term-AGA) and language development.....           | 41 |
| 19 | Figure 36: Association between late preterm birth, 34-37 weeks (reference: term) and language         |    |
| 20 | development.....                                                                                      | 42 |
| 21 | Figure 37: Association between early preterm birth, < 34 weeks (reference: term) and language         |    |
| 22 | development.....                                                                                      | 43 |
| 23 | Figure 38: Association between moderate SGA (reference: AGA) and language development. ....           | 44 |
| 24 | Figure 39: Association between severe SGA (reference: AGA) and language development. ....             | 45 |
| 25 | Figure 40: Association between no maternal education (reference: primary education) and cognitive     |    |
| 26 | development.....                                                                                      | 46 |
| 27 | Figure 41: Association between maternal secondary education (reference: primary education) and        |    |
| 28 | cognitive development. ....                                                                           | 47 |
| 29 | Figure 42: Association between maternal higher education (reference: primary education) and cognitive |    |
| 30 | development.....                                                                                      | 48 |
| 31 | Figure 43: Association between no paternal education (reference: primary education) and cognitive     |    |
| 32 | development.....                                                                                      | 49 |
| 33 | Figure 44: Association between paternal secondary education (reference: primary education) and        |    |
| 34 | cognitive development. ....                                                                           | 50 |
| 35 | Figure 45: Association between paternal higher education (reference: primary education) and cognitive |    |
| 36 | development.....                                                                                      | 51 |
| 37 | Figure 46: Association between maternal ages < 15 (reference: ages 20-34) and cognitive development.  |    |
| 38 | .....                                                                                                 | 52 |
| 39 | Figure 47: Association between maternal ages 15-20 (reference: ages 20-34) and cognitive              |    |
| 40 | development.....                                                                                      | 53 |
| 41 | Figure 48: Association between maternal ages >35 (reference: ages 20-34) and cognitive development.   |    |
| 42 | .....                                                                                                 | 54 |
| 43 | Figure 49: Association between maternal height < 145cm (reference: >155 cm) and cognitive             |    |
| 44 | development.....                                                                                      | 55 |
| 45 |                                                                                                       |    |
| 46 |                                                                                                       |    |
| 47 |                                                                                                       |    |
| 48 |                                                                                                       |    |
| 49 |                                                                                                       |    |
| 50 |                                                                                                       |    |
| 51 |                                                                                                       |    |
| 52 |                                                                                                       |    |
| 53 |                                                                                                       |    |
| 54 |                                                                                                       |    |
| 55 |                                                                                                       |    |
| 56 |                                                                                                       |    |
| 57 |                                                                                                       |    |
| 58 |                                                                                                       |    |
| 59 |                                                                                                       |    |
| 60 |                                                                                                       |    |

|    |                                                                                                                 |    |
|----|-----------------------------------------------------------------------------------------------------------------|----|
| 1  |                                                                                                                 |    |
| 2  |                                                                                                                 |    |
| 3  | Figure 50: Association between maternal height 145-150cm (reference: >155 cm) and cognitive                     |    |
| 4  | development.....                                                                                                | 56 |
| 5  | Figure 51: Association between maternal height 150-155 cm (reference: >155 cm) and cognitive                    |    |
| 6  | development.....                                                                                                | 57 |
| 7  | Figure 52: Association between maternal BMI <18.5 kg/m <sup>2</sup> (reference: 18.5-25) and cognitive          |    |
| 8  | development.....                                                                                                | 58 |
| 9  | Figure 53: Association between maternal BMI 25-30 kg/m <sup>2</sup> (reference: 18.5-25) and cognitive          |    |
| 10 | development.....                                                                                                | 59 |
| 11 | Figure 54: Association between maternal BMI >30 kg/m <sup>2</sup> (reference: 18.5-25) and cognitive            |    |
| 12 | development.....                                                                                                | 60 |
| 13 | Figure 55: Association between mild anemia in pregnancy (reference: no anemia) and cognitive                    |    |
| 14 | development.....                                                                                                | 61 |
| 15 | Figure 56: Association between maternal moderate anemia (reference: no anemia) and cognitive                    |    |
| 16 | development.....                                                                                                | 62 |
| 17 | Figure 57: Association between no maternal education (reference: primary education) and motor                   |    |
| 18 | development.....                                                                                                | 63 |
| 19 | Figure 58: Association between maternal secondary education (reference: primary education) and                  |    |
| 20 | motor development.....                                                                                          | 64 |
| 21 | Figure 59: Association between maternal higher education (reference: primary education) and motor               |    |
| 22 | development.....                                                                                                | 65 |
| 23 | Figure 60: Association between no paternal education (reference: primary education) and motor                   |    |
| 24 | development.....                                                                                                | 66 |
| 25 | Figure 61: Association between paternal secondary education (reference: primary education) and motor            |    |
| 26 | development.....                                                                                                | 67 |
| 27 | Figure 62: Association between paternal higher education (reference: primary education) and motor               |    |
| 28 | development.....                                                                                                | 68 |
| 29 | Figure 63: Association between maternal ages < 15 (reference: ages 20-34) and motor development. ...            | 69 |
| 30 | Figure 64: Association between maternal ages 15-20 (reference: ages 20-34) and motor development. ...           | 70 |
| 31 | Figure 65: Association between maternal ages >35 (reference: ages 20-34) and motor development. ...             | 71 |
| 32 | Figure 66: Association between maternal height <145 (reference: >155 cm) and motor development... ..            | 72 |
| 33 | Figure 67: Association between maternal height 145-150 (reference: >155 cm) and motor development.              |    |
| 34 | .....                                                                                                           | 73 |
| 35 | Figure 68: Association between maternal height 150-155 (reference: >155 cm) and motor development.              |    |
| 36 | .....                                                                                                           | 74 |
| 37 | Figure 69: Association between maternal BMI <18.5 kg/m <sup>2</sup> (reference: 18.5-25) and motor development. |    |
| 38 | .....                                                                                                           | 75 |
| 39 | Figure 70: Association between maternal BMI <25-30 kg/m <sup>2</sup> (reference: 18.5-25) and motor             |    |
| 40 | development.....                                                                                                | 76 |
| 41 | Figure 71: Association between maternal BMI >30 kg/m <sup>2</sup> (reference: 18.5-25) and motor development.   |    |
| 42 | .....                                                                                                           | 77 |
| 43 | Figure 72: Association between maternal mild anemia (reference: no anemia) and motor development                |    |
| 44 | .....                                                                                                           | 78 |
| 45 |                                                                                                                 |    |
| 46 |                                                                                                                 |    |
| 47 |                                                                                                                 |    |
| 48 |                                                                                                                 |    |
| 49 |                                                                                                                 |    |
| 50 |                                                                                                                 |    |
| 51 |                                                                                                                 |    |
| 52 |                                                                                                                 |    |
| 53 |                                                                                                                 |    |
| 54 |                                                                                                                 |    |
| 55 |                                                                                                                 |    |
| 56 |                                                                                                                 |    |
| 57 |                                                                                                                 |    |
| 58 |                                                                                                                 |    |
| 59 |                                                                                                                 |    |
| 60 |                                                                                                                 |    |



|    |                                                                                                       |    |
|----|-------------------------------------------------------------------------------------------------------|----|
| 1  |                                                                                                       |    |
| 2  |                                                                                                       |    |
| 3  | Figure 73: Association between maternal moderate anemia (reference: no anemia) and motor              |    |
| 4  | development.....                                                                                      | 79 |
| 5  |                                                                                                       |    |
| 6  | Figure 74: Association between no maternal education (reference: primary education) and language      |    |
| 7  | development.....                                                                                      | 80 |
| 8  |                                                                                                       |    |
| 9  | Figure 75: Association between maternal secondary education (reference: primary education) and        |    |
| 10 | language development. ....                                                                            | 81 |
| 11 |                                                                                                       |    |
| 12 | Figure 76: Association between maternal higher education (reference: primary education) and language  |    |
| 13 | development.....                                                                                      | 82 |
| 14 |                                                                                                       |    |
| 15 | Figure 77: Association between no paternal education (reference: primary education) and language      |    |
| 16 | development.....                                                                                      | 83 |
| 17 |                                                                                                       |    |
| 18 | Figure 78: Association between paternal secondary education (reference: primary education) and        |    |
| 19 | language development. ....                                                                            | 84 |
| 20 |                                                                                                       |    |
| 21 | Figure 79: Association between paternal higher education (reference: primary education) and language  |    |
| 22 | development.....                                                                                      | 85 |
| 23 |                                                                                                       |    |
| 24 | Figure 80: Association between maternal ages 15-20 (reference: ages 20-34) and language development.  |    |
| 25 | .....                                                                                                 | 86 |
| 26 |                                                                                                       |    |
| 27 | Figure 81: Association between maternal ages >35 (reference: ages 20-34) and language development.    |    |
| 28 | .....                                                                                                 | 87 |
| 29 |                                                                                                       |    |
| 30 | Figure 82: Association between maternal height <145 cm (reference: >155 cm) and language              |    |
| 31 | development.....                                                                                      | 88 |
| 32 |                                                                                                       |    |
| 33 | Figure 83: Association between maternal height 145-150cm (reference: >155 cm) and language            |    |
| 34 | development.....                                                                                      | 89 |
| 35 |                                                                                                       |    |
| 36 | Figure 84: Association between maternal height 150-155 cm (reference: >155 cm) and language           |    |
| 37 | development.....                                                                                      | 90 |
| 38 |                                                                                                       |    |
| 39 | Figure 85: Association between maternal BMI 25-30 kg/m <sup>2</sup> (reference: 18.5-25) and language |    |
| 40 | development.....                                                                                      | 91 |
| 41 |                                                                                                       |    |
| 42 | Figure 86: Association between maternal BMI >30 kg/m <sup>2</sup> (reference: 18.5-25) and language   |    |
| 43 | development.....                                                                                      | 92 |
| 44 |                                                                                                       |    |
| 45 |                                                                                                       |    |
| 46 |                                                                                                       |    |
| 47 |                                                                                                       |    |
| 48 |                                                                                                       |    |
| 49 |                                                                                                       |    |
| 50 |                                                                                                       |    |
| 51 |                                                                                                       |    |
| 52 |                                                                                                       |    |
| 53 |                                                                                                       |    |
| 54 |                                                                                                       |    |
| 55 |                                                                                                       |    |
| 56 |                                                                                                       |    |
| 57 |                                                                                                       |    |
| 58 |                                                                                                       |    |
| 59 |                                                                                                       |    |
| 60 |                                                                                                       |    |

1. **Child Risk Factors on Child's Cognitive Development**

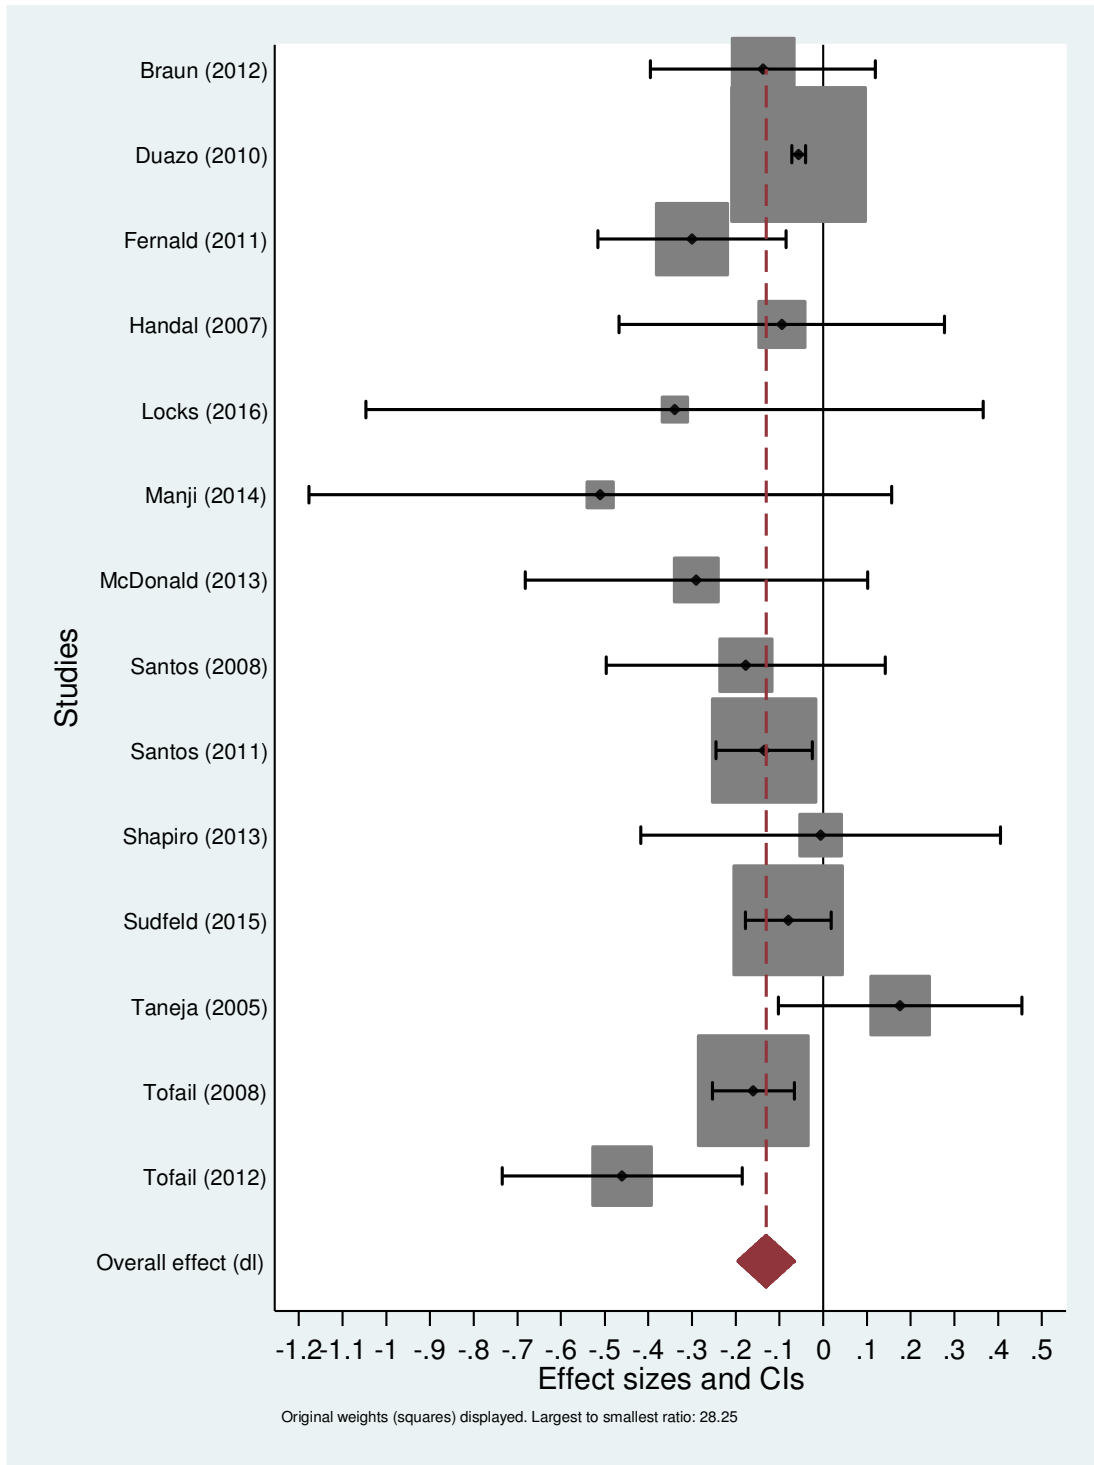

Figure 1: Association between low birth weight (LBW) and (reference: normal birth weight) and cognitive development.

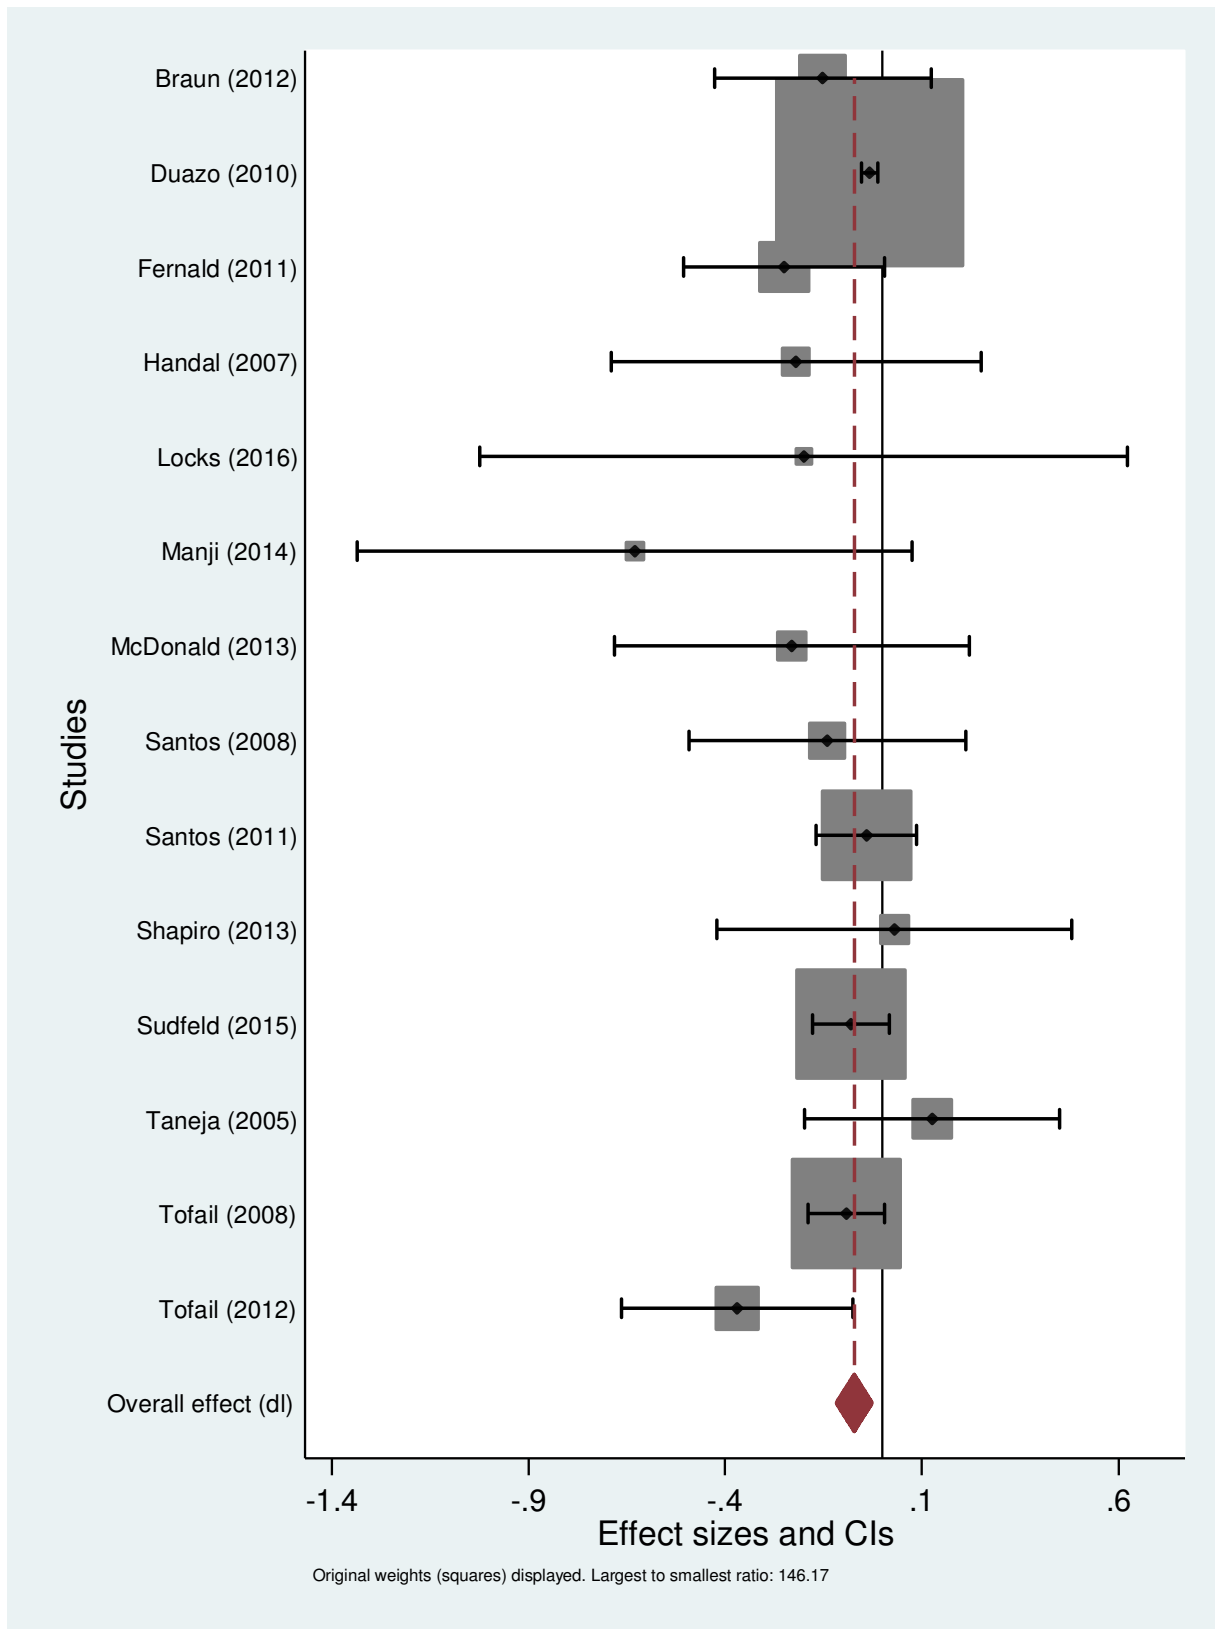

Figure 2: Association between Moderately low birth Weight (reference, normal birth weight) and cognitive development.

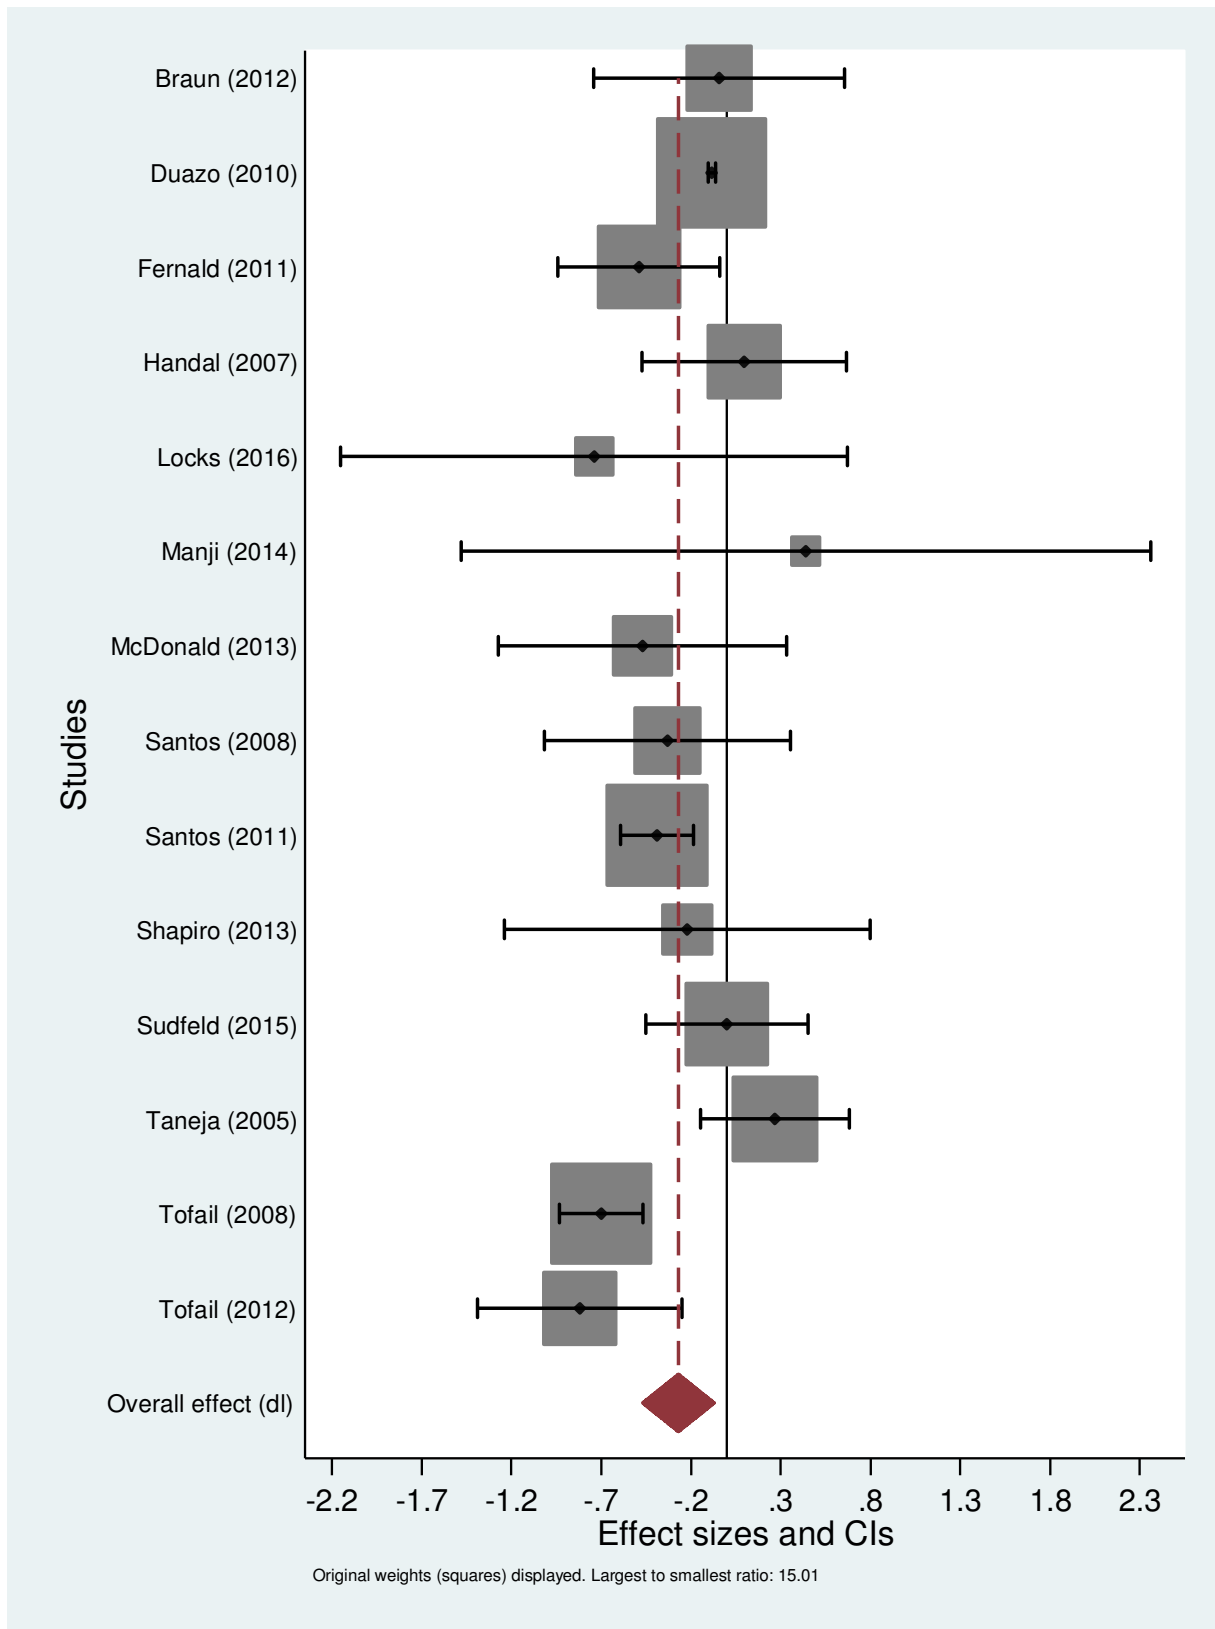

Figure 3: Association between very low Birth weight (reference: normal birth weight) and cognitive development.

1  
2  
3  
4  
5  
6  
7  
8  
9  
10  
11  
12  
13  
14  
15  
16  
17  
18  
19  
20  
21  
22  
23  
24  
25  
26  
27  
28  
29  
30  
31  
32  
33  
34  
35  
36  
37  
38  
39  
40  
41  
42  
43  
44  
45  
46  
47  
48  
49  
50  
51  
52  
53  
54  
55  
56  
57  
58  
59  
60

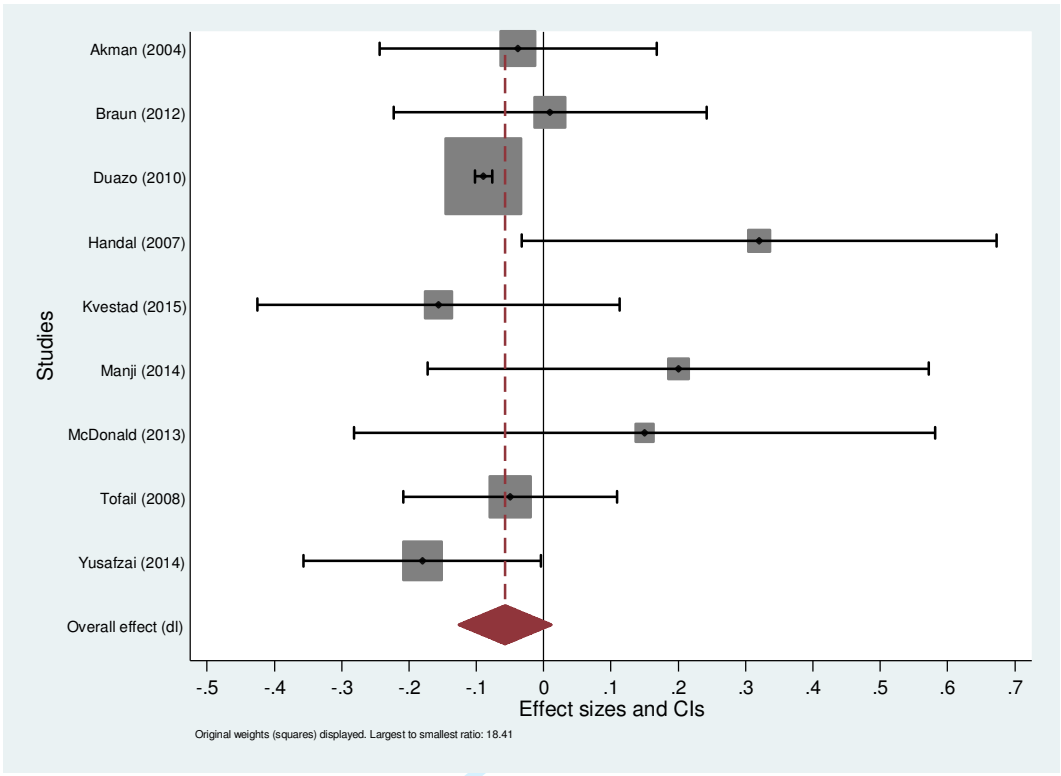

Figure 4: Association between child mild anemia (reference: no anemia) and cognitive development.

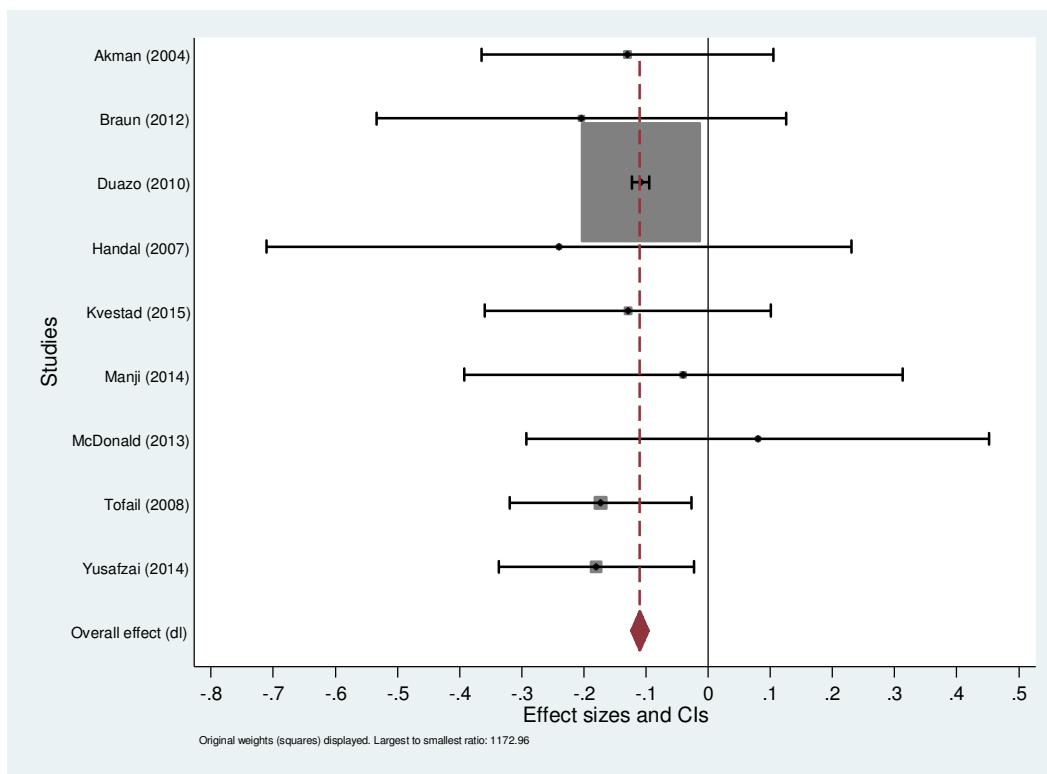

**Figure 5: Association between child moderate anemia (reference: no anemia) and cognitive development.**

1  
2  
3  
4  
5  
6  
7  
8  
9  
10  
11  
12  
13  
14  
15  
16  
17  
18  
19  
20  
21  
22  
23  
24  
25  
26  
27  
28  
29  
30  
31  
32  
33  
34  
35  
36  
37  
38  
39  
40  
41  
42  
43  
44  
45  
46  
47  
48  
49  
50  
51  
52  
53  
54  
55  
56  
57  
58  
59  
60

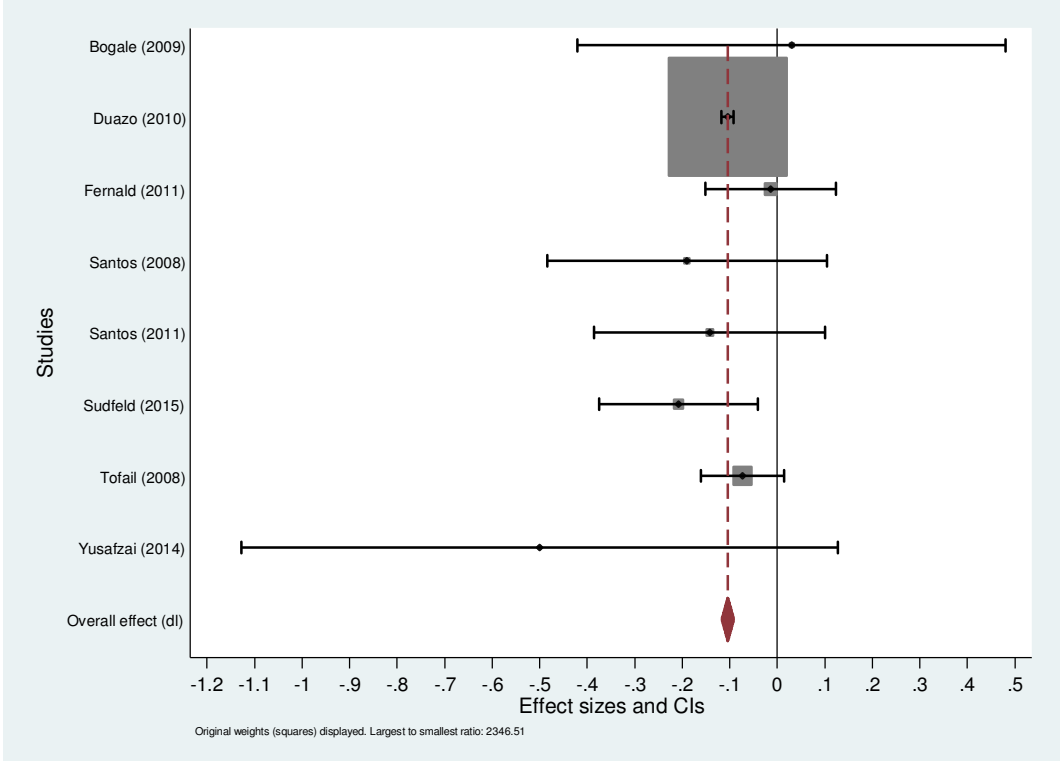

Figure 6: Association between lack of access to clean water (reference: access to clean water) and cognitive development.

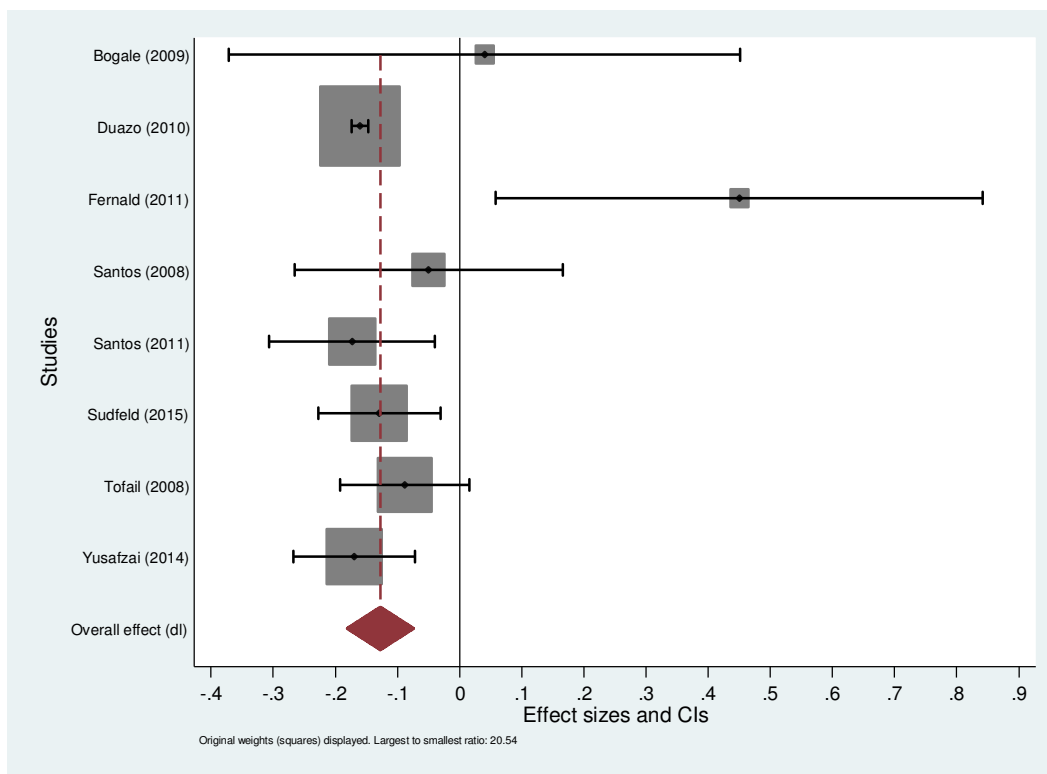

**Figure 7: Association between lack of access to sanitation (reference: access to sanitation) and cognitive development.**



1  
2  
3  
4  
5  
6  
7  
8  
9  
10  
11  
12  
13  
14  
15  
16  
17  
18  
19  
20  
21  
22  
23  
24  
25  
26  
27  
28  
29  
30  
31  
32  
33  
34  
35  
36  
37  
38  
39  
40  
41  
42  
43  
44  
45  
46  
47  
48  
49  
50  
51  
52  
53  
54  
55  
56  
57  
58  
59  
60

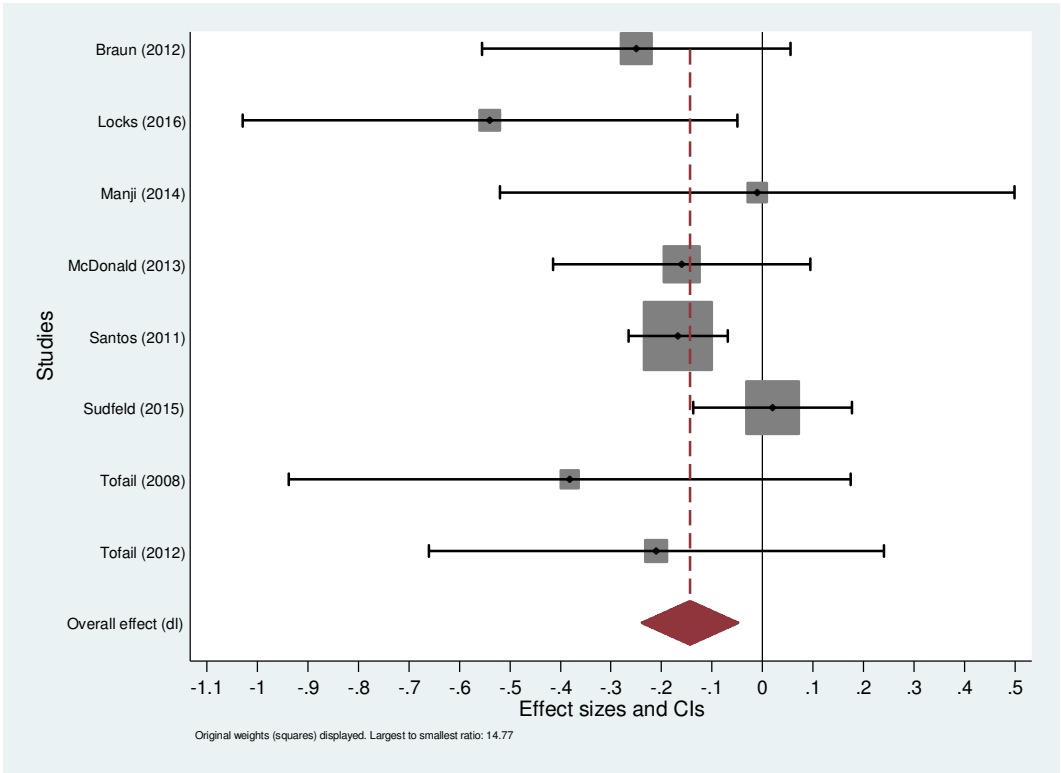

Figure 8: Association between preterm-AGA (reference: term-AGA) and cognitive development.

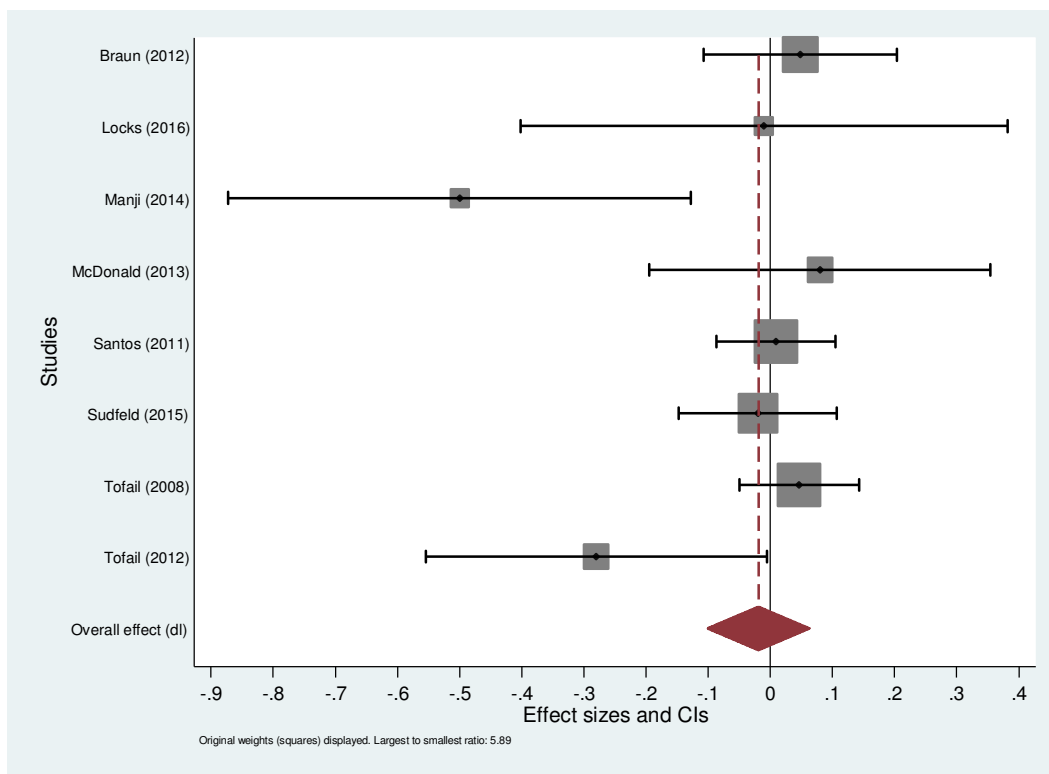

**Figure 9: Association between term-SGA (reference: term-AGA) and cognitive development.**

1  
2  
3  
4  
5  
6  
7  
8  
9  
10  
11  
12  
13  
14  
15  
16  
17  
18  
19  
20  
21  
22  
23  
24  
25  
26  
27  
28  
29  
30  
31  
32  
33  
34  
35  
36  
37  
38  
39  
40  
41  
42  
43  
44  
45  
46  
47  
48  
49  
50  
51  
52  
53  
54  
55  
56  
57  
58  
59  
60

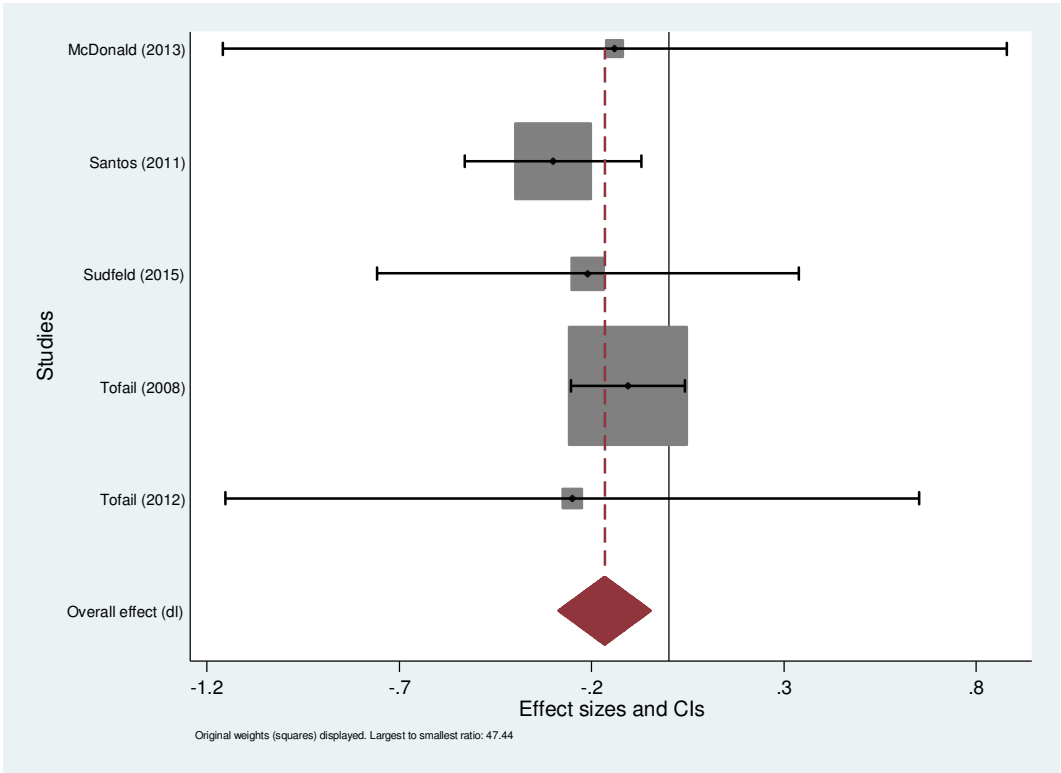

**Figure 10: Association between preterm- SGA (reference: term-AGA) and cognitive development.**

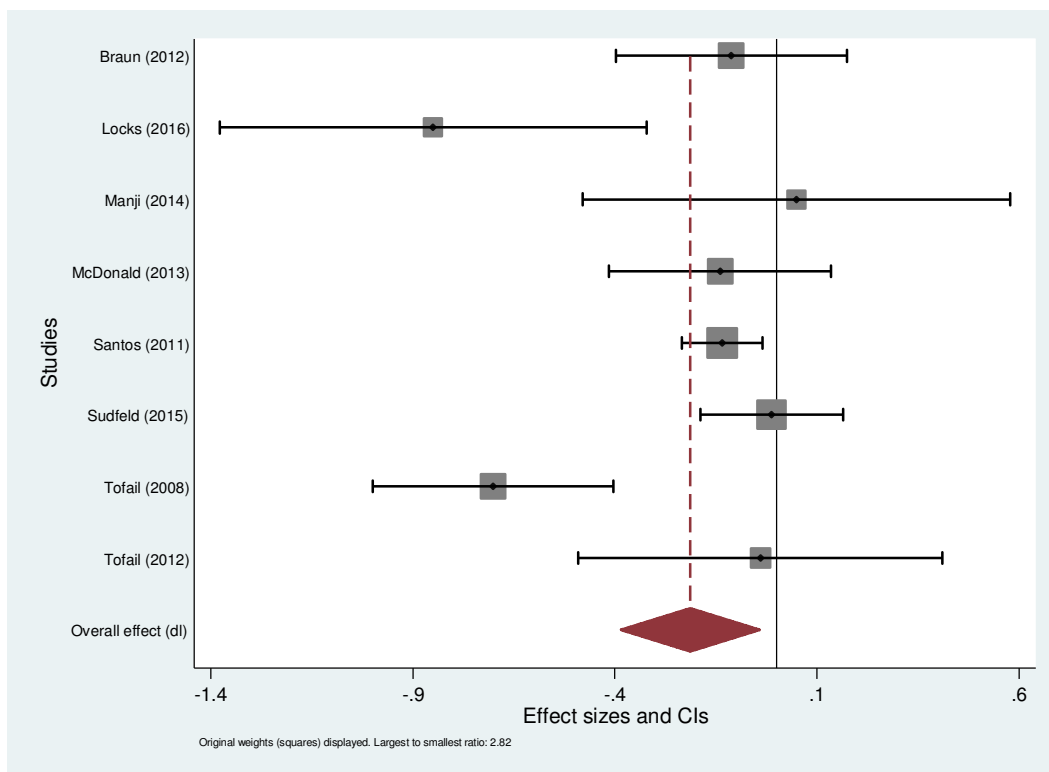

Figure 11: Association between late preterm birth, 34-37 weeks (reference: term) and cognitive development.

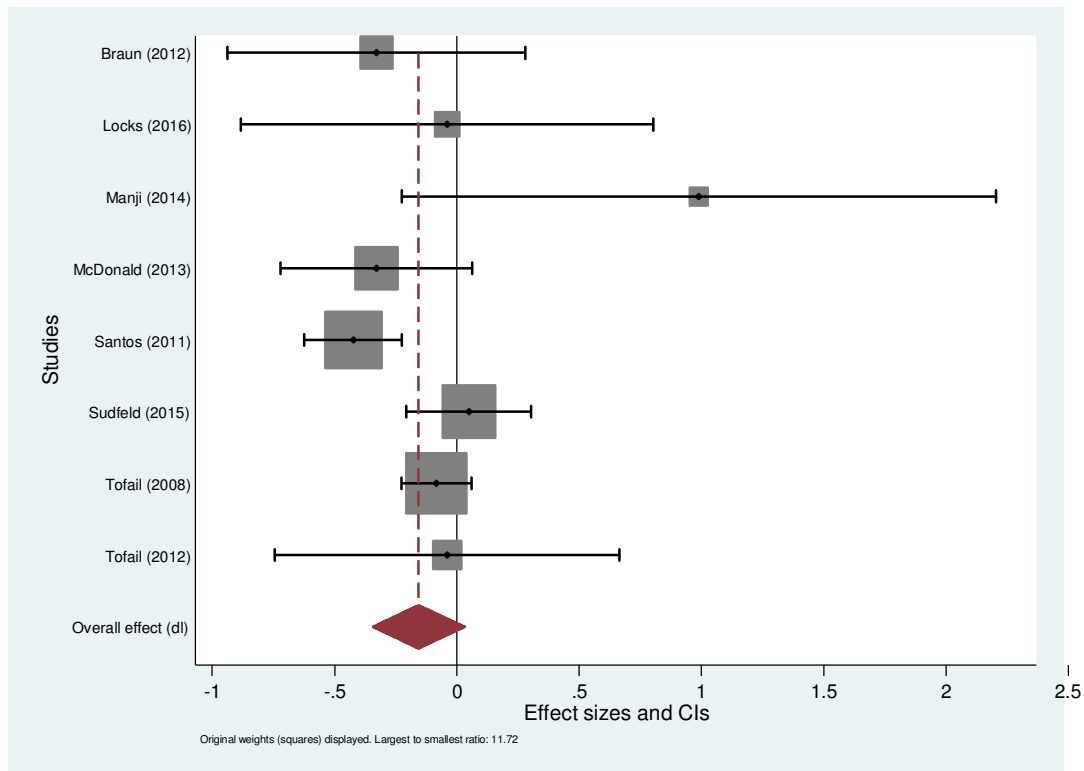

Figure 12: Association between early preterm birth, < 34 weeks (reference: term) and cognitive development.

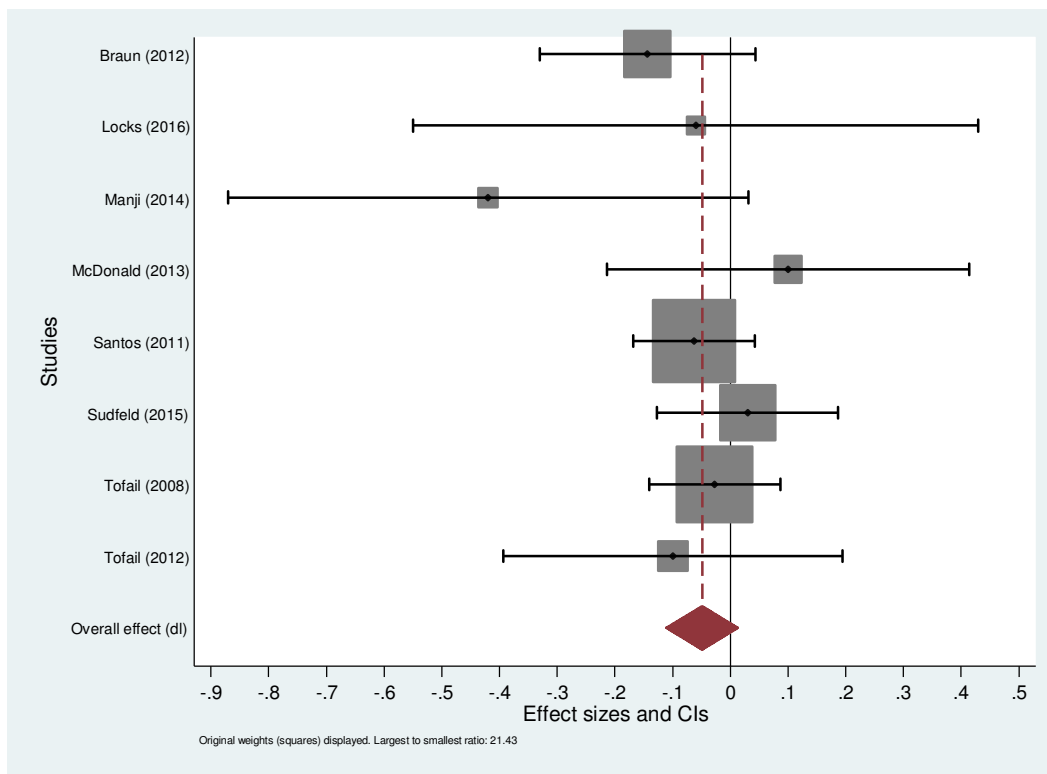

**Figure 13: Association between moderate SGA (reference: AGA) and cognitive development.**

1  
2  
3  
4  
5  
6  
7  
8  
9  
10  
11  
12  
13  
14  
15  
16  
17  
18  
19  
20  
21  
22  
23  
24  
25  
26  
27  
28  
29  
30  
31  
32  
33  
34  
35  
36  
37  
38  
39  
40  
41  
42  
43  
44  
45  
46  
47  
48  
49  
50  
51  
52  
53  
54  
55  
56  
57  
58  
59  
60

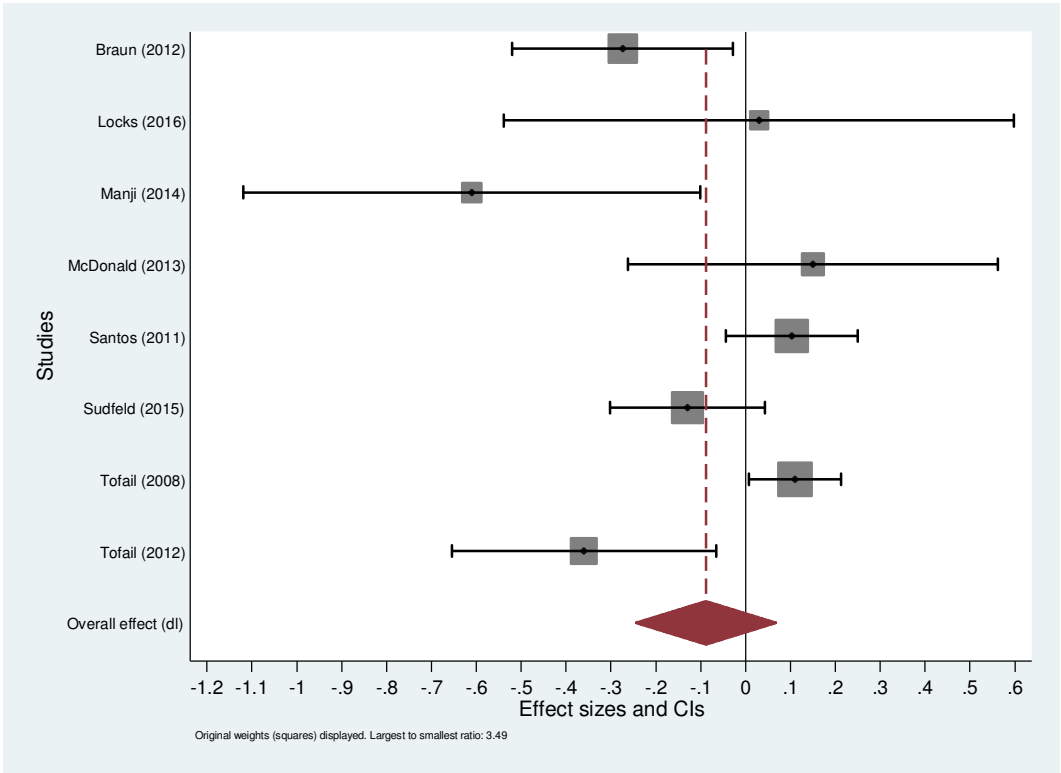

**Figure 14: Association between severe SGA (reference: AGA) and cognitive development.**

2. Child Risk Factors on Child’s Motor Development

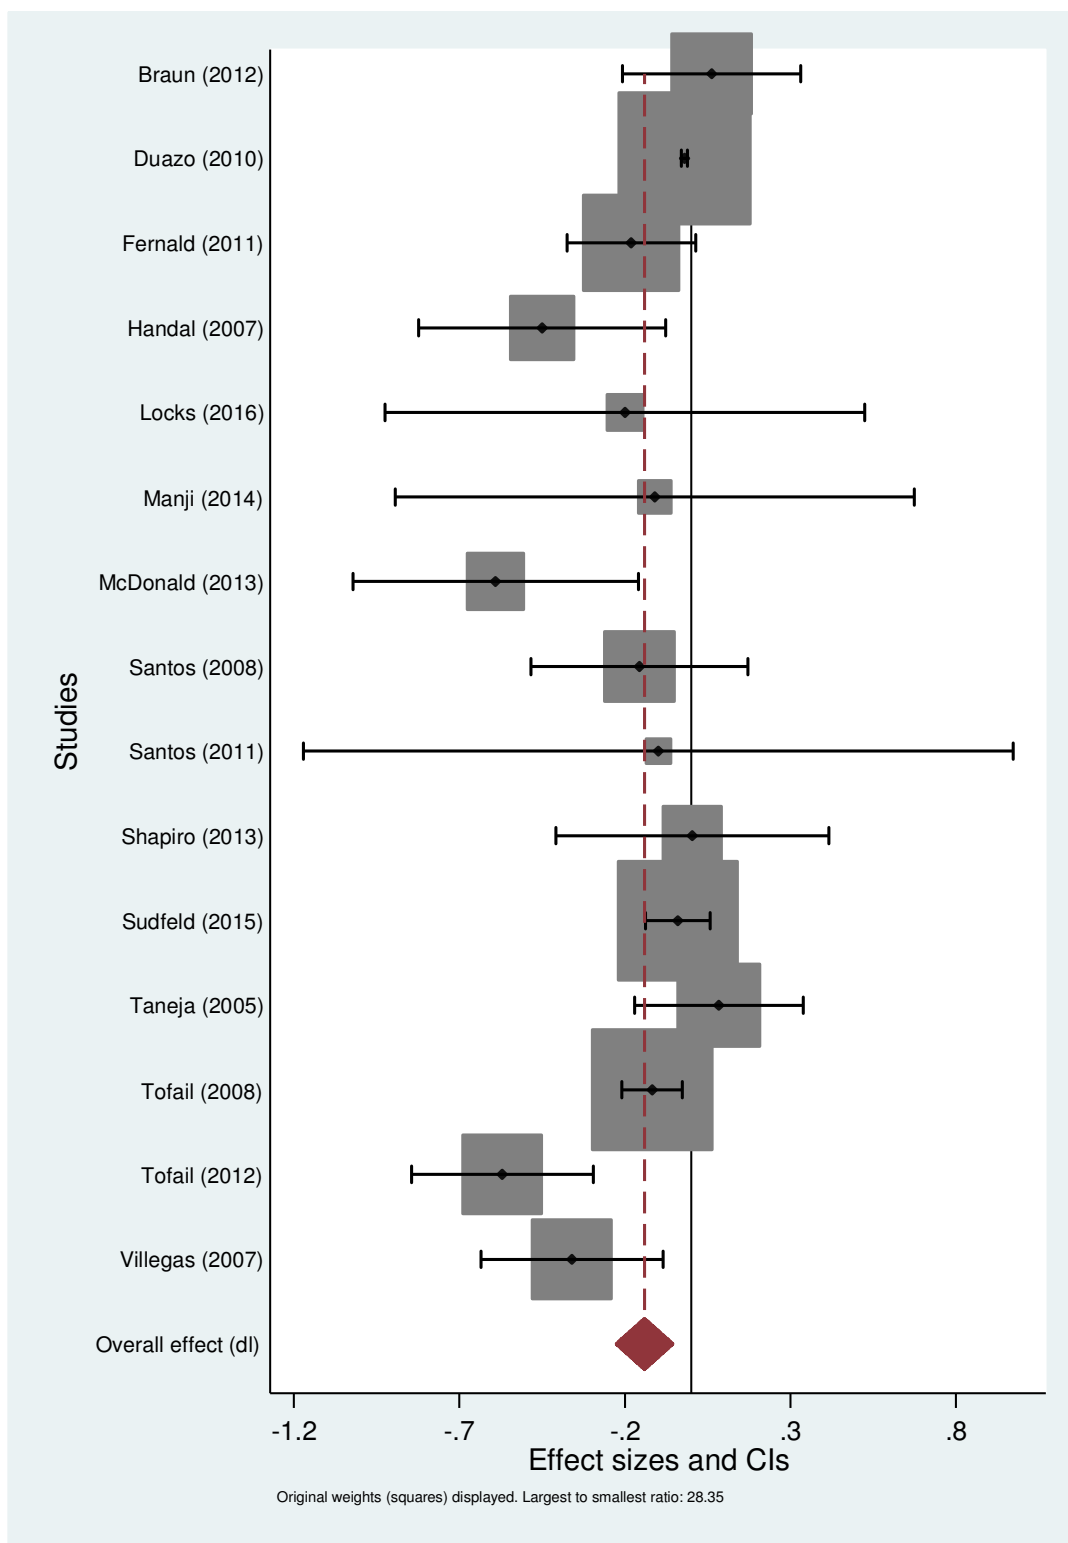

Figure 15: Association between low birth weight (reference: normal birth weight) and motor development.



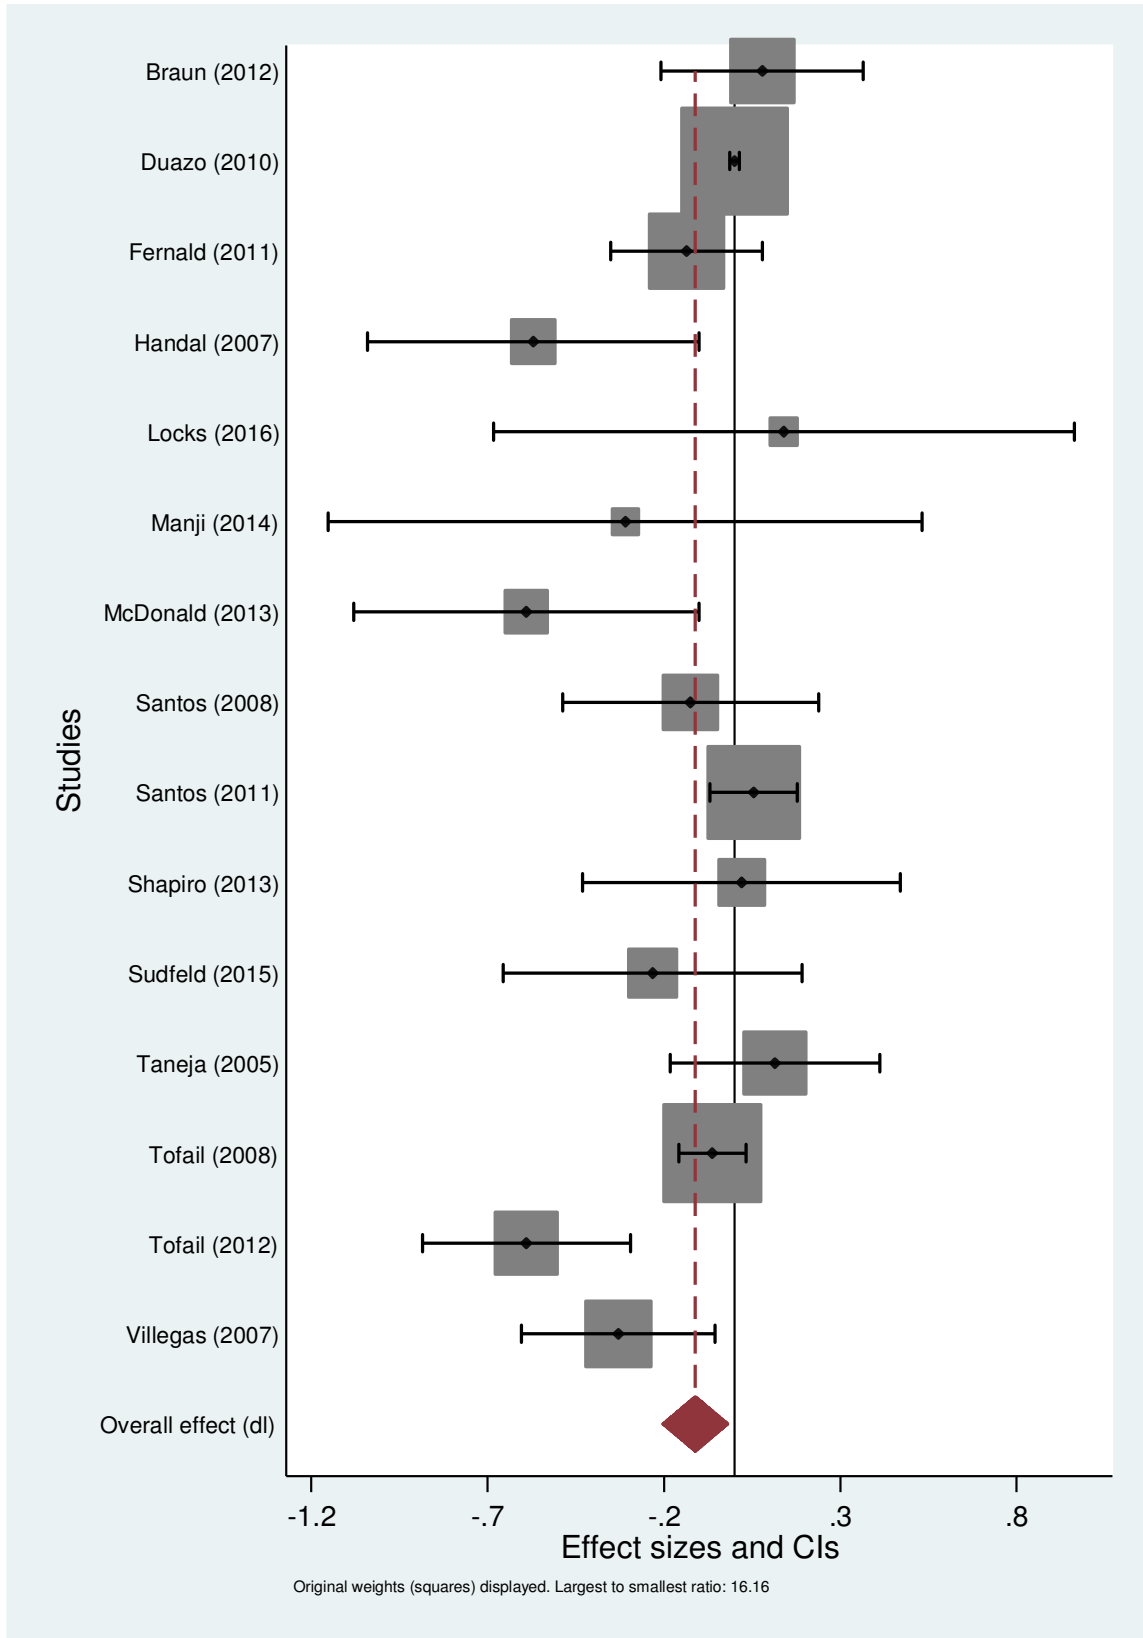

Figure 16: Association between moderately low birth weight (reference: normal birth weight) and motor development.

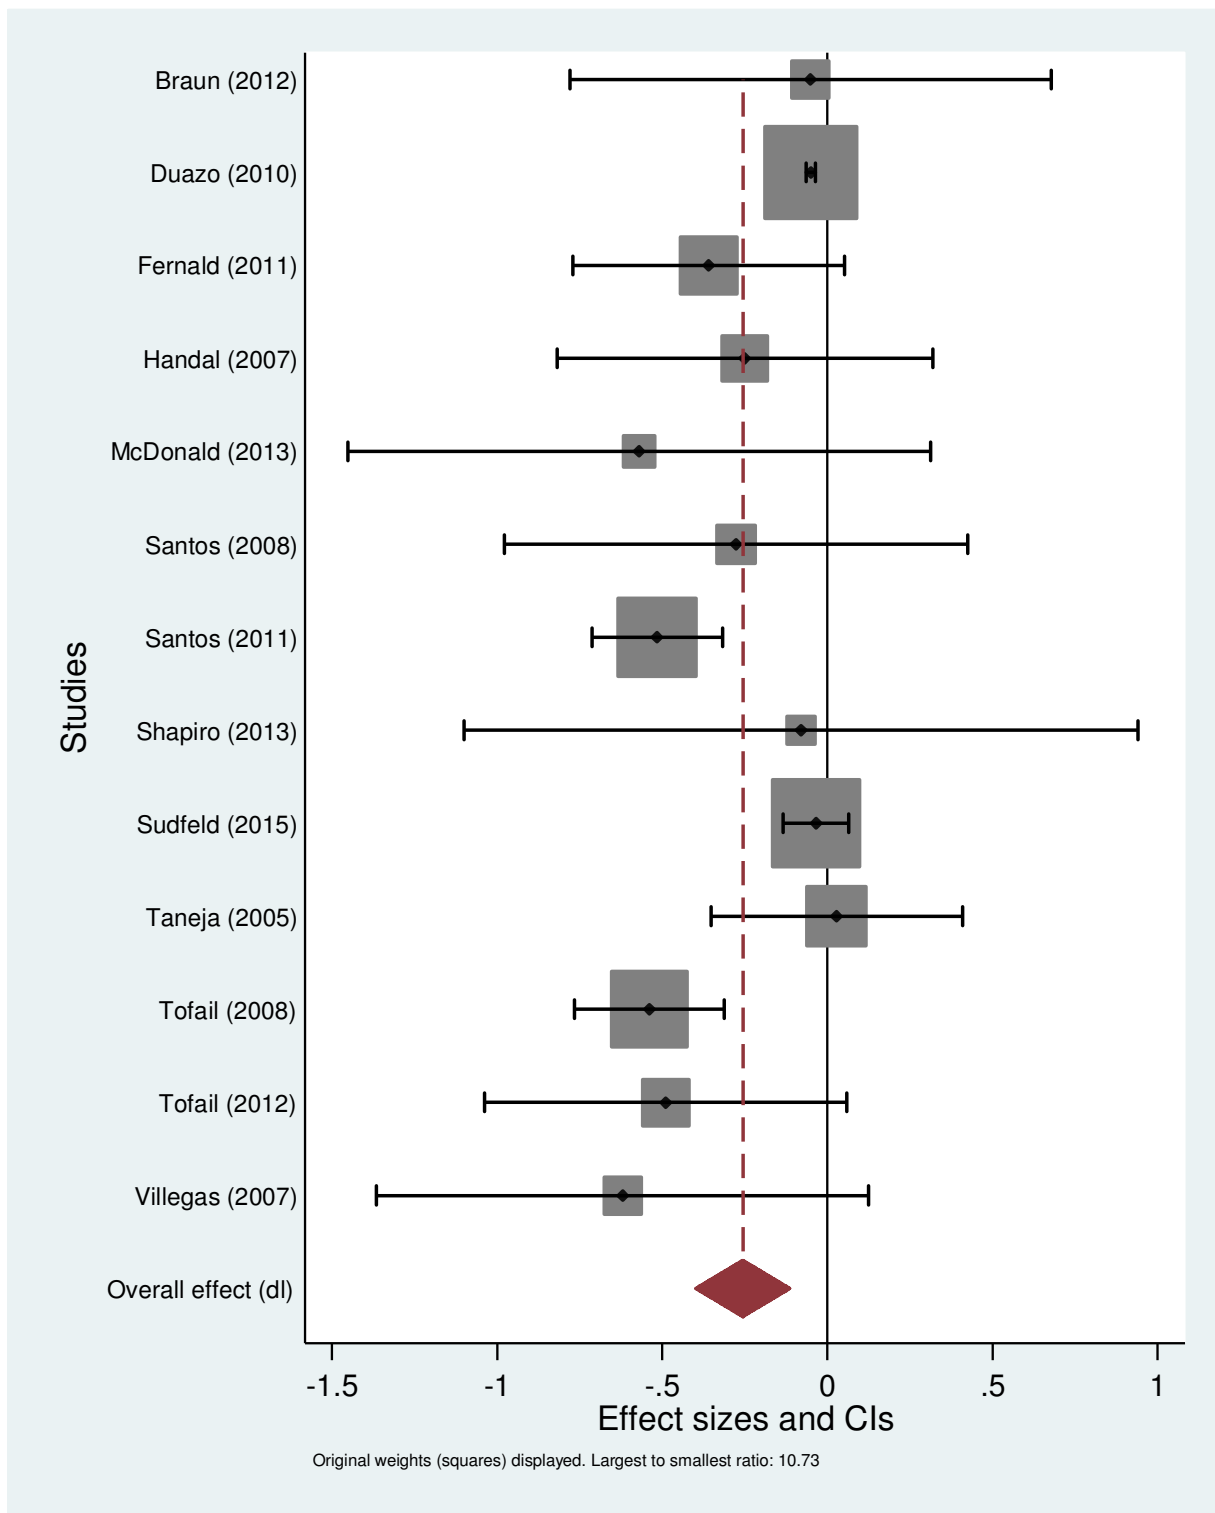

Figure 17: Association between very low birth weight (reference: normal birth weight) and motor development.

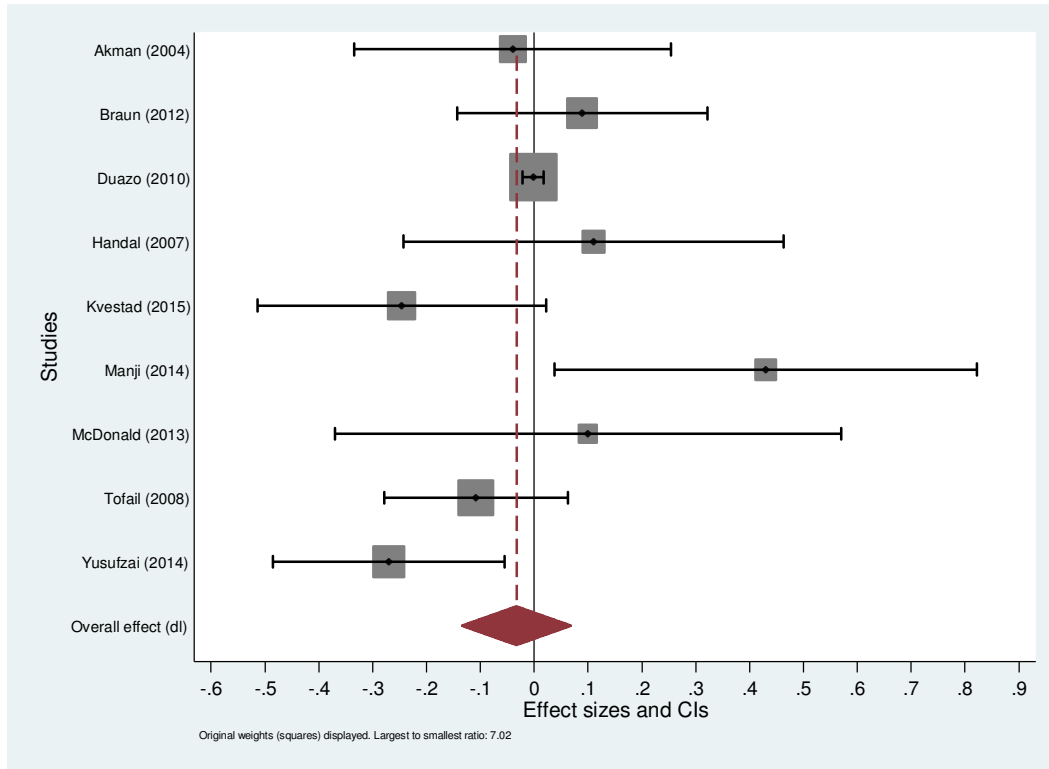

**Figure 18: Association between child mild anemia (reference: no anemia) and motor development.**

Review only

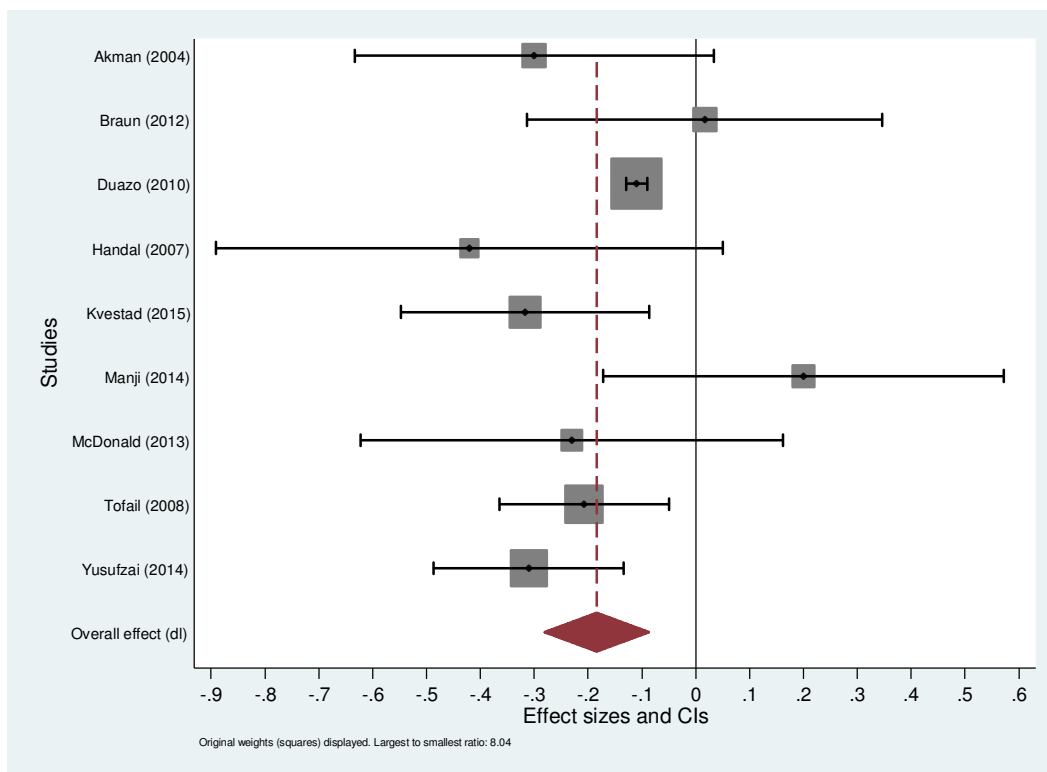

**Figure 19: Association between child moderate anemia (reference: no anemia) and motor development.**

1  
2  
3  
4  
5  
6  
7  
8  
9  
10  
11  
12  
13  
14  
15  
16  
17  
18  
19  
20  
21  
22  
23  
24  
25  
26  
27  
28  
29  
30  
31  
32  
33  
34  
35  
36  
37  
38  
39  
40  
41  
42  
43  
44  
45  
46  
47  
48  
49  
50  
51  
52  
53  
54  
55  
56  
57  
58  
59  
60

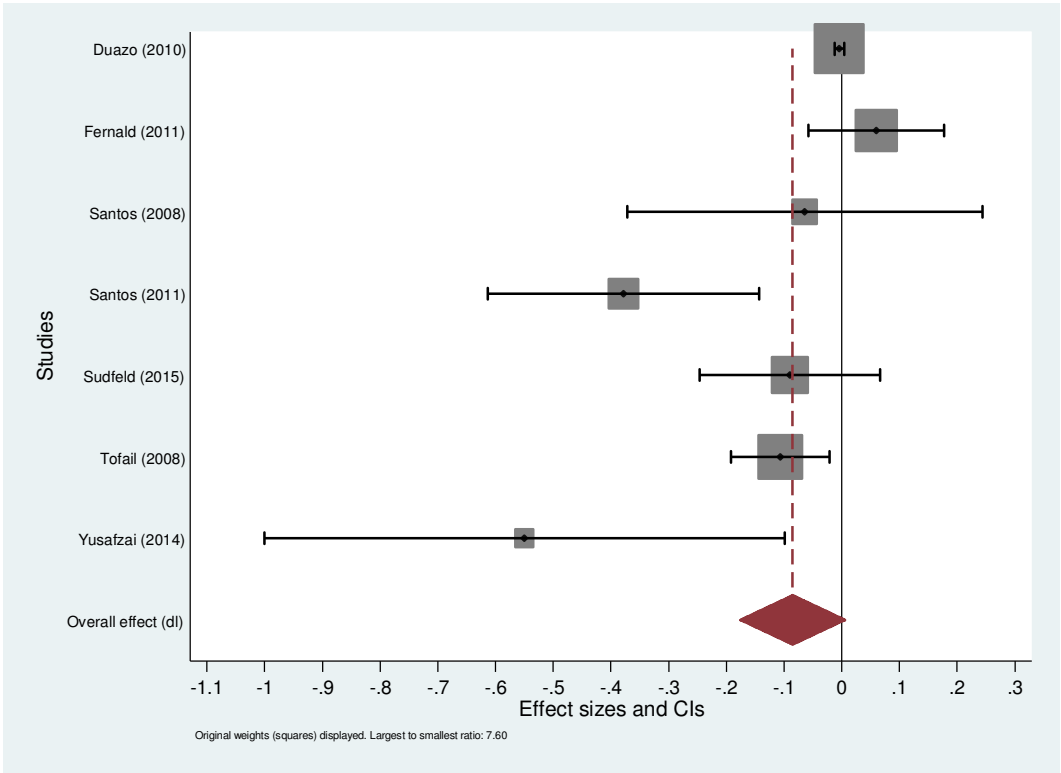

Figure 20: Association between lack of access to clean water (reference: access to clean water) and motor development.

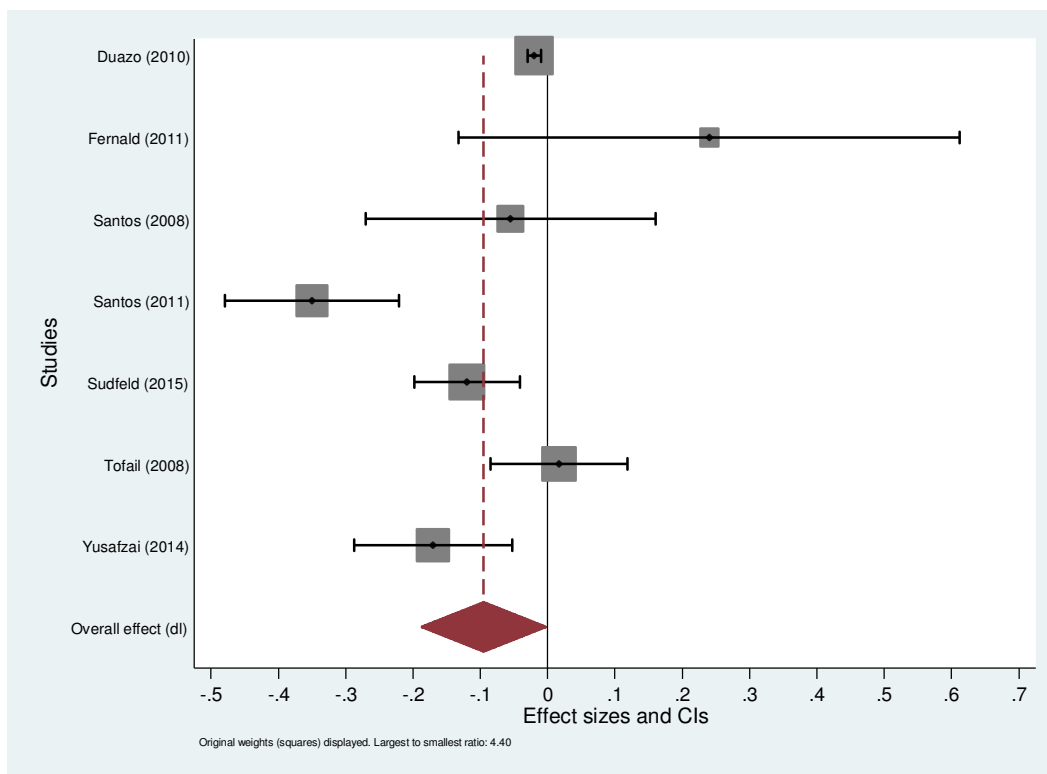

Figure 21: Association between lack of access to sanitation (reference: access to sanitation) and motor development.

1  
2  
3  
4  
5  
6  
7  
8  
9  
10  
11  
12  
13  
14  
15  
16  
17  
18  
19  
20  
21  
22  
23  
24  
25  
26  
27  
28  
29  
30  
31  
32  
33  
34  
35  
36  
37  
38  
39  
40  
41  
42  
43  
44  
45  
46  
47  
48  
49  
50  
51  
52  
53  
54  
55  
56  
57  
58  
59  
60

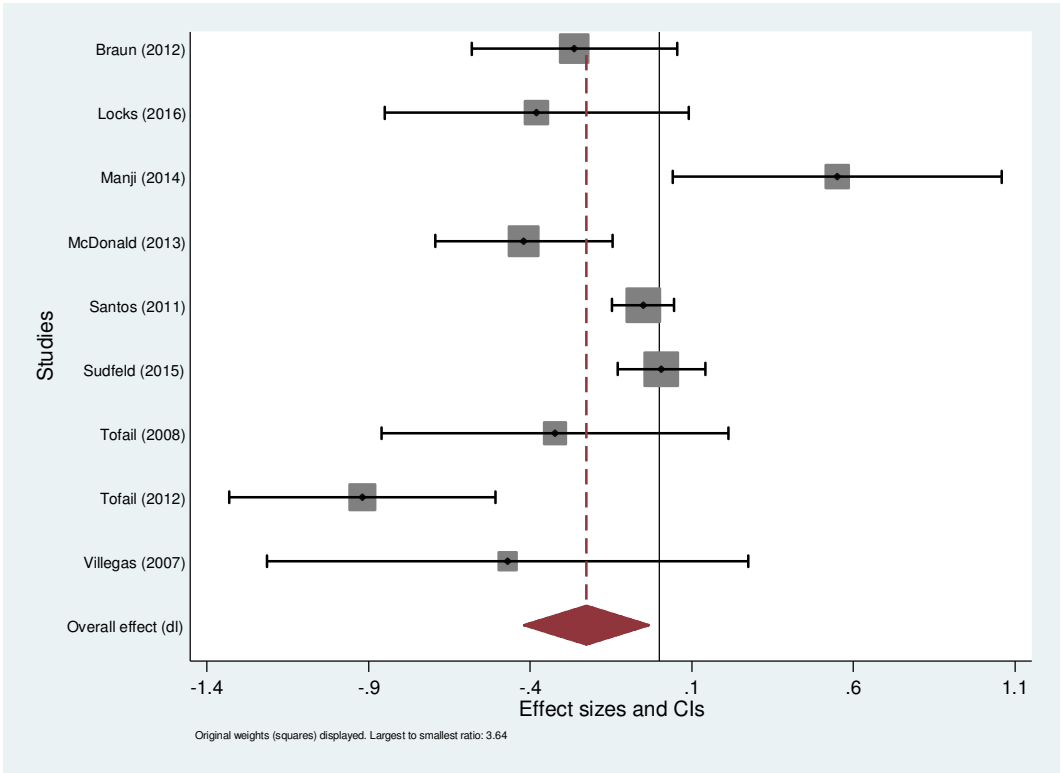

**Figure 22: Association between preterm-AGA (reference: term-AGA) and motor development.**

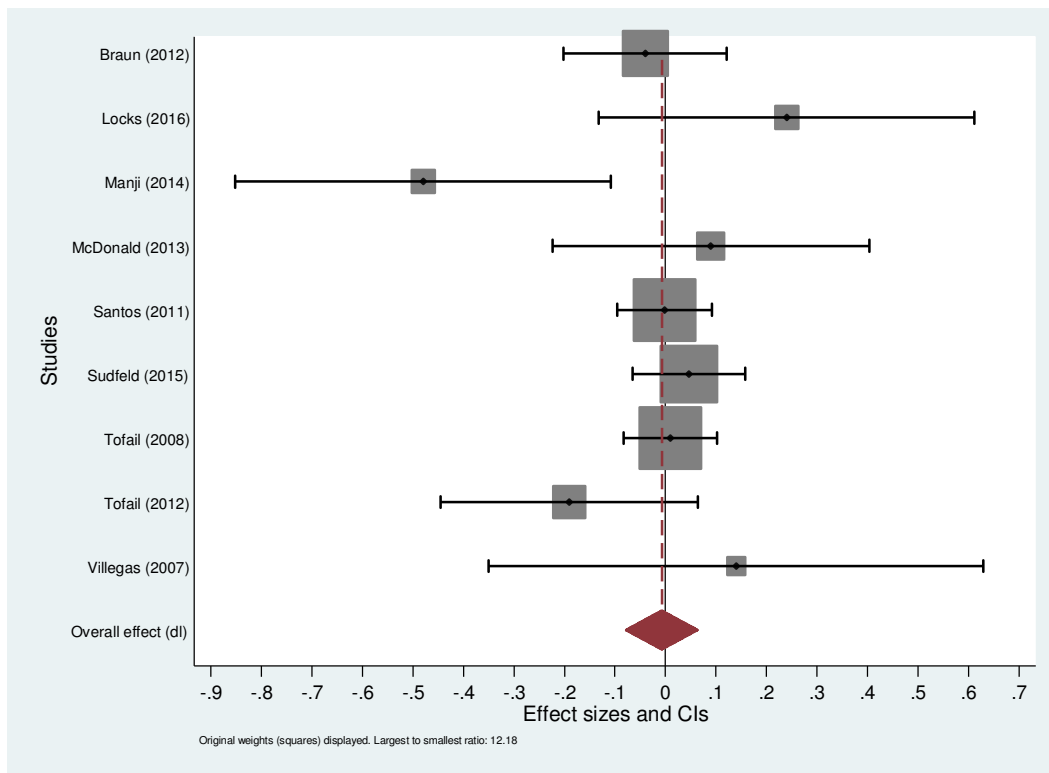

**Figure 23: Association between term-SGA (reference: term-AGA) and motor development.**



1  
2  
3  
4  
5  
6  
7  
8  
9  
10  
11  
12  
13  
14  
15  
16  
17  
18  
19  
20  
21  
22  
23  
24  
25  
26  
27  
28  
29  
30  
31  
32  
33  
34  
35  
36  
37  
38  
39  
40  
41  
42  
43  
44  
45  
46  
47  
48  
49  
50  
51  
52  
53  
54  
55  
56  
57  
58  
59  
60

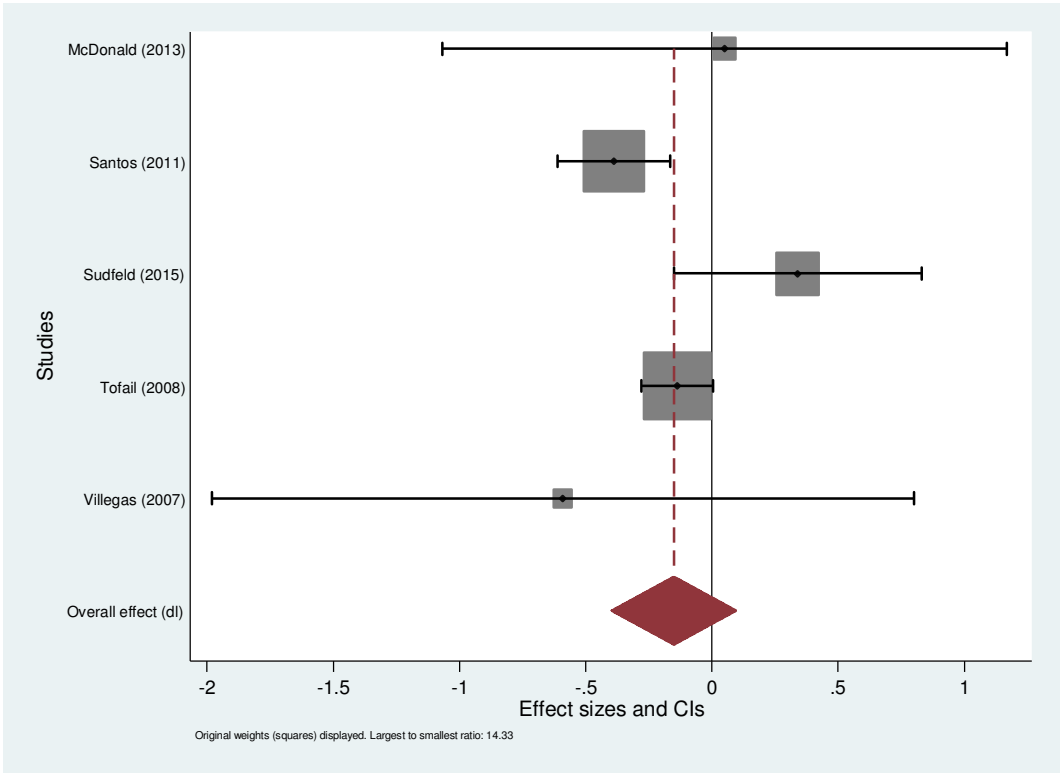

Figure 24: Association between preterm-SGA (reference: term-AGA) and motor development.

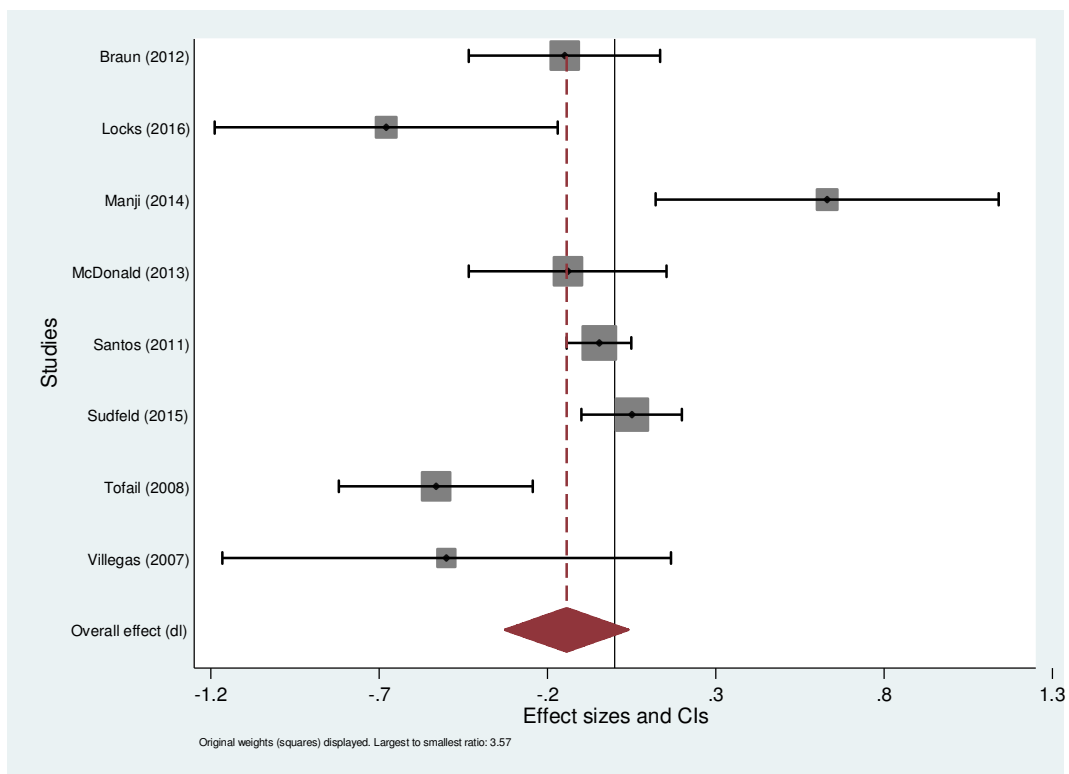

**Figure 25: Association between late preterm birth, 34-37 weeks (reference: term) and motor development.**

1  
2  
3  
4  
5  
6  
7  
8  
9  
10  
11  
12  
13  
14  
15  
16  
17  
18  
19  
20  
21  
22  
23  
24  
25  
26  
27  
28  
29  
30  
31  
32  
33  
34  
35  
36  
37  
38  
39  
40  
41  
42  
43  
44  
45  
46  
47  
48  
49  
50  
51  
52  
53  
54  
55  
56  
57  
58  
59  
60

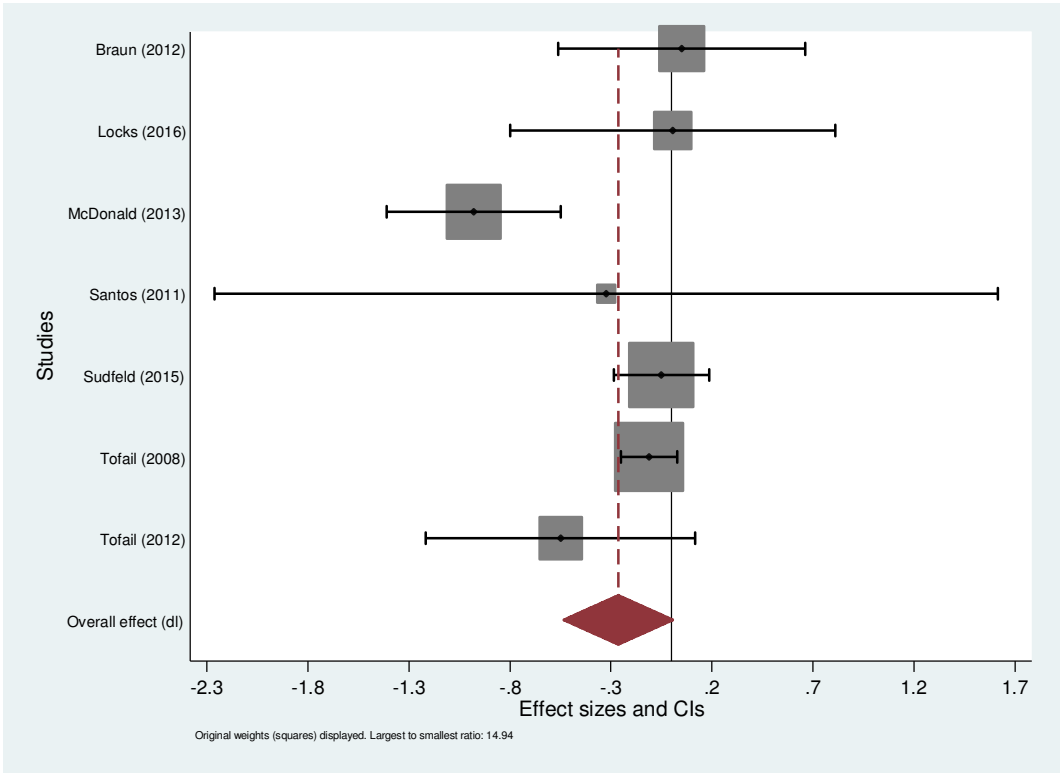

**Figure 26: Association between early preterm birth, < 34 weeks (reference: term) and motor development.**

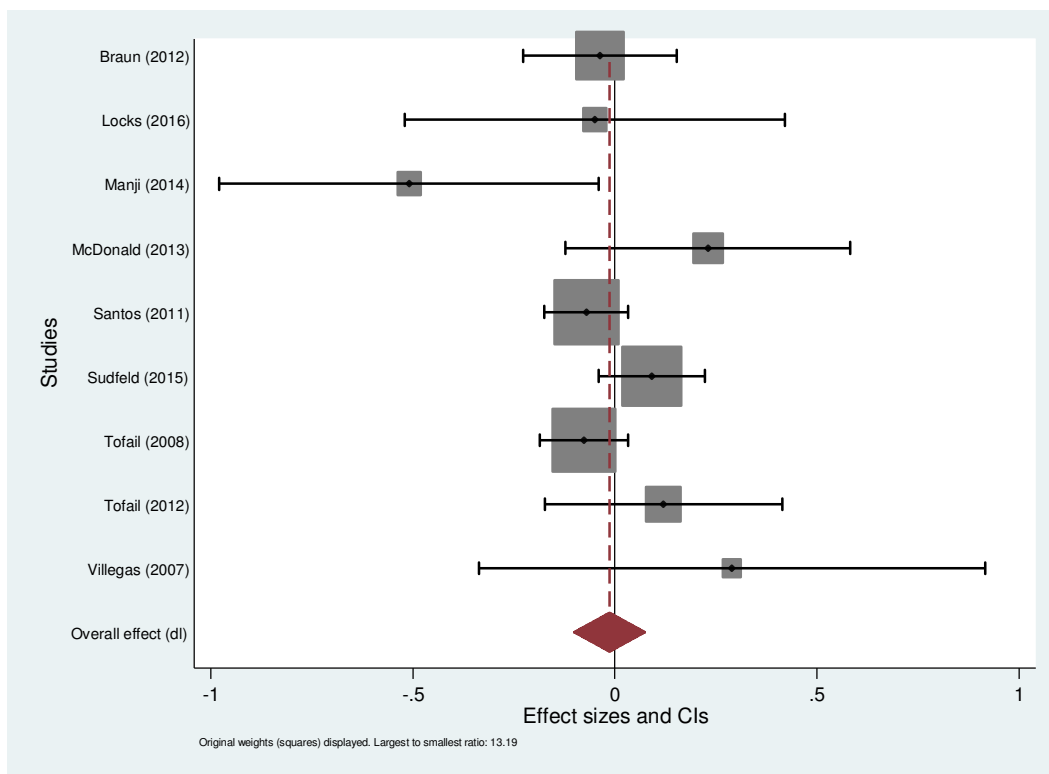

**Figure 27: Association between moderate SGA (reference: AGA) and motor development.**

1  
2  
3  
4  
5  
6  
7  
8  
9  
10  
11  
12  
13  
14  
15  
16  
17  
18  
19  
20  
21  
22  
23  
24  
25  
26  
27  
28  
29  
30  
31  
32  
33  
34  
35  
36  
37  
38  
39  
40  
41  
42  
43  
44  
45  
46  
47  
48  
49  
50  
51  
52  
53  
54  
55  
56  
57  
58  
59  
60

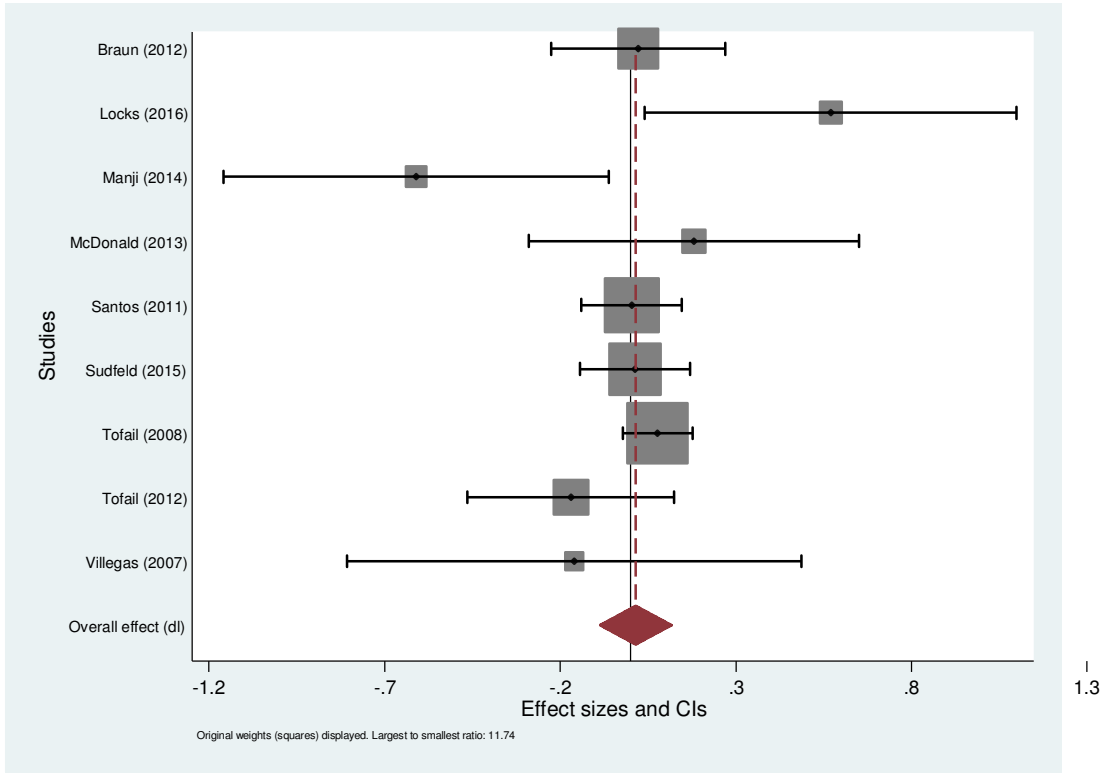

Figure 28: Association between severe SGA (reference: AGA) and motor development.

### 3. Child Risk Factors on Child's Language Development

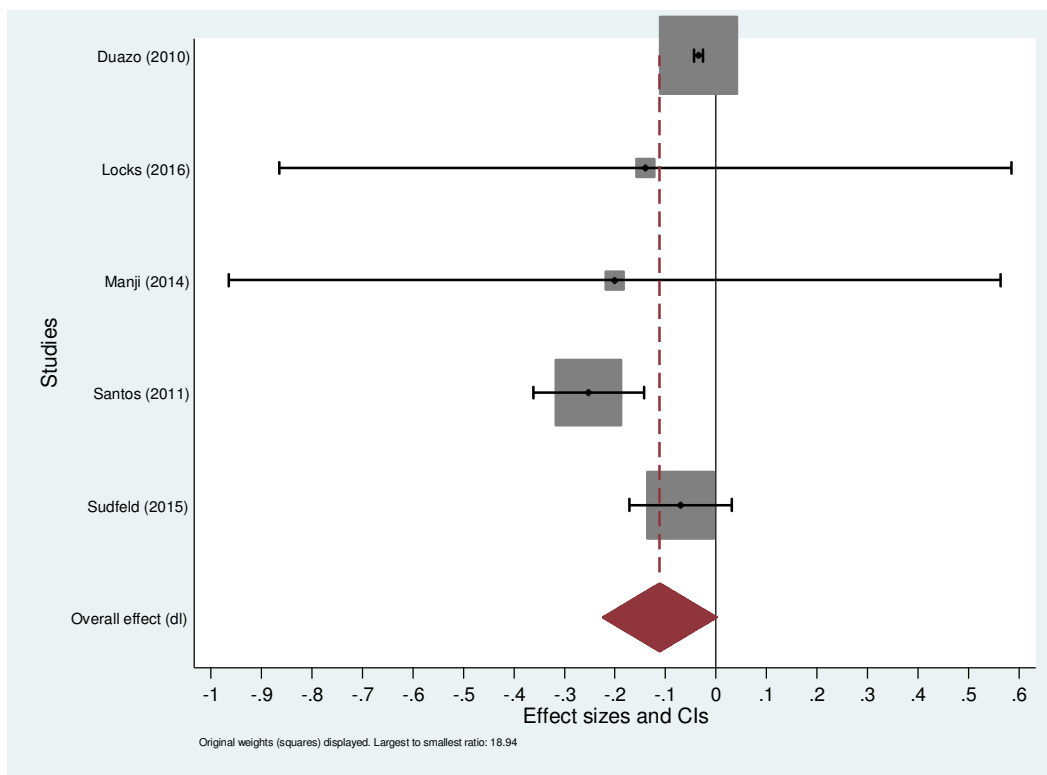

Figure 29: Association between low birth weight (LBW) and (reference: normal birth weight) and language development.

1  
2  
3  
4  
5  
6  
7  
8  
9  
10  
11  
12  
13  
14  
15  
16  
17  
18  
19  
20  
21  
22  
23  
24  
25  
26  
27  
28  
29  
30  
31  
32  
33  
34  
35  
36  
37  
38  
39  
40  
41  
42  
43  
44  
45  
46  
47  
48  
49  
50  
51  
52  
53  
54  
55  
56  
57  
58  
59  
60

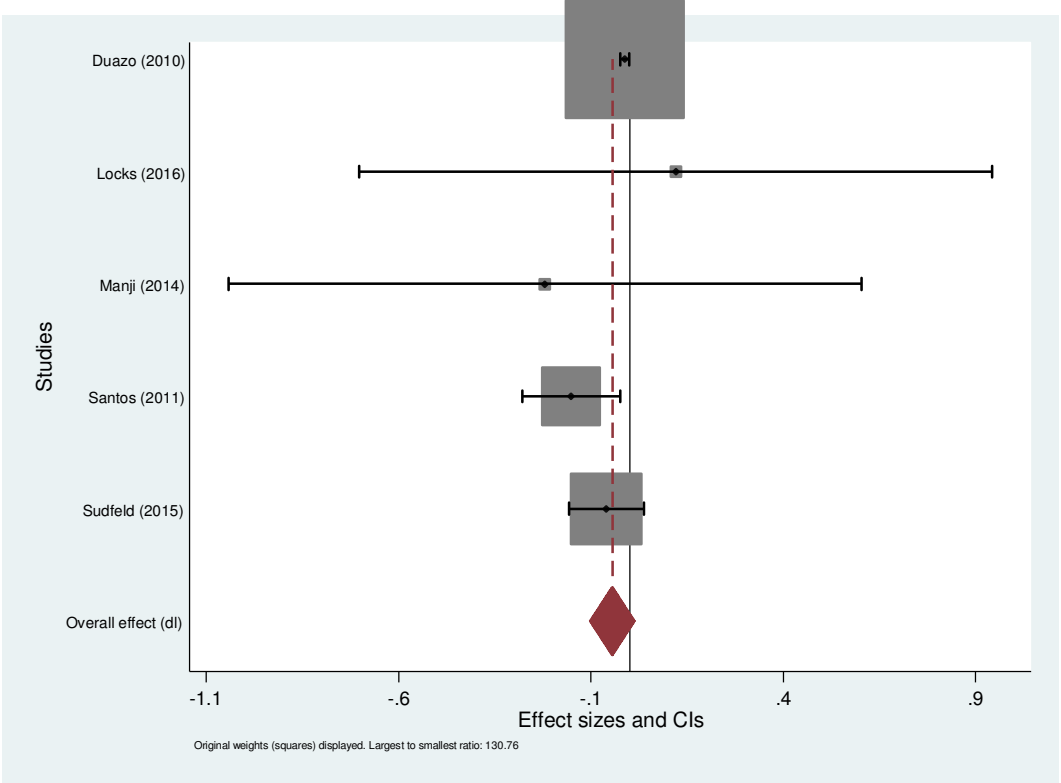

**Figure 30: Association between moderately low birth weight and (reference: normal birth weight) and language development.**

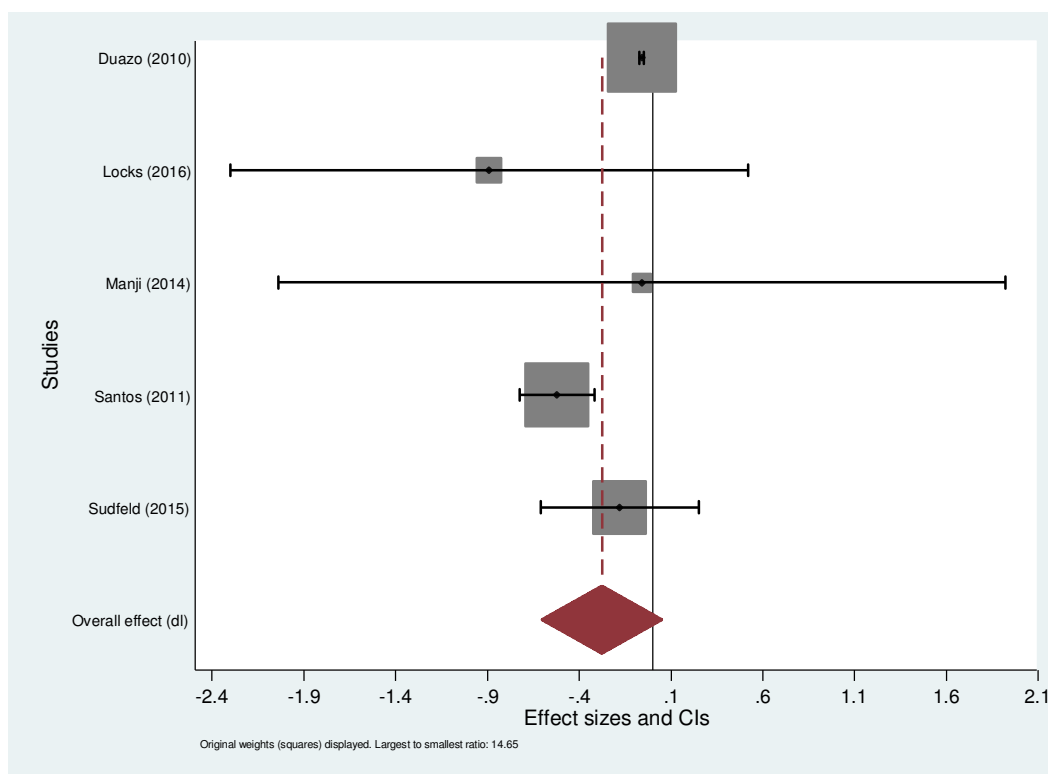

**Figure 31: Association between very low birth weight and (reference: normal birth weight) and language development.**



1  
2  
3  
4  
5  
6  
7  
8  
9  
10  
11  
12  
13  
14  
15  
16  
17  
18  
19  
20  
21  
22  
23  
24  
25  
26  
27  
28  
29  
30  
31  
32  
33  
34  
35  
36  
37  
38  
39  
40  
41  
42  
43  
44  
45  
46  
47  
48  
49  
50  
51  
52  
53  
54  
55  
56  
57  
58  
59  
60

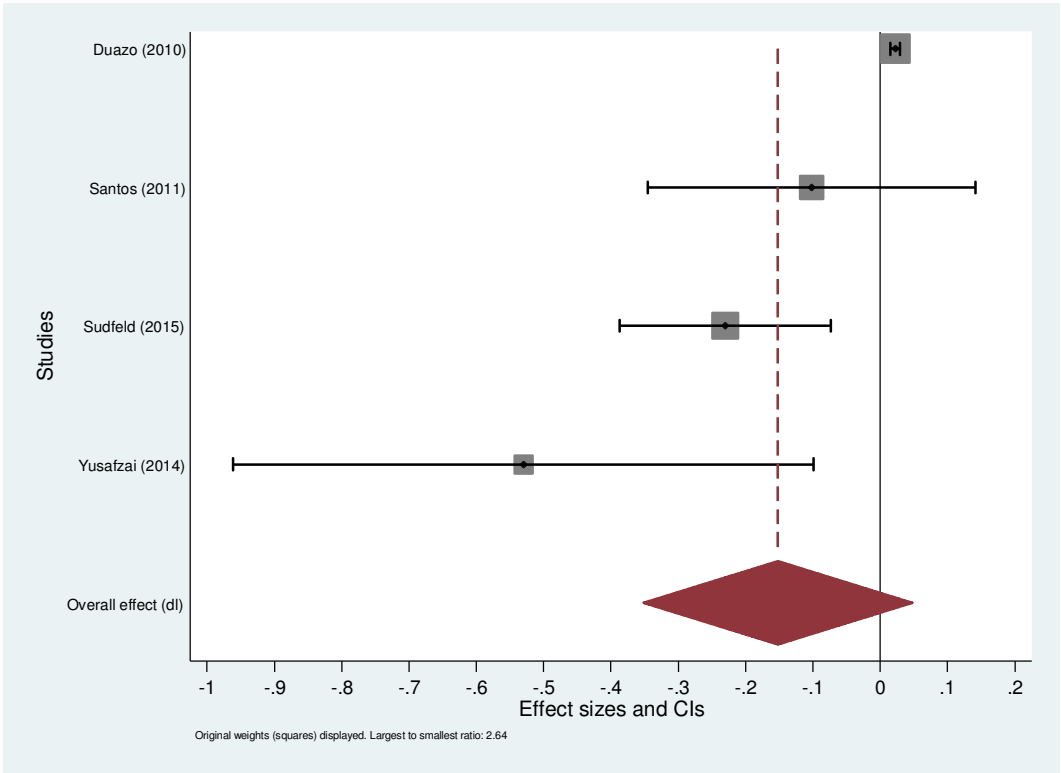

Figure 32: Association between lack of access to clean water (reference: access to clean water) and language development.

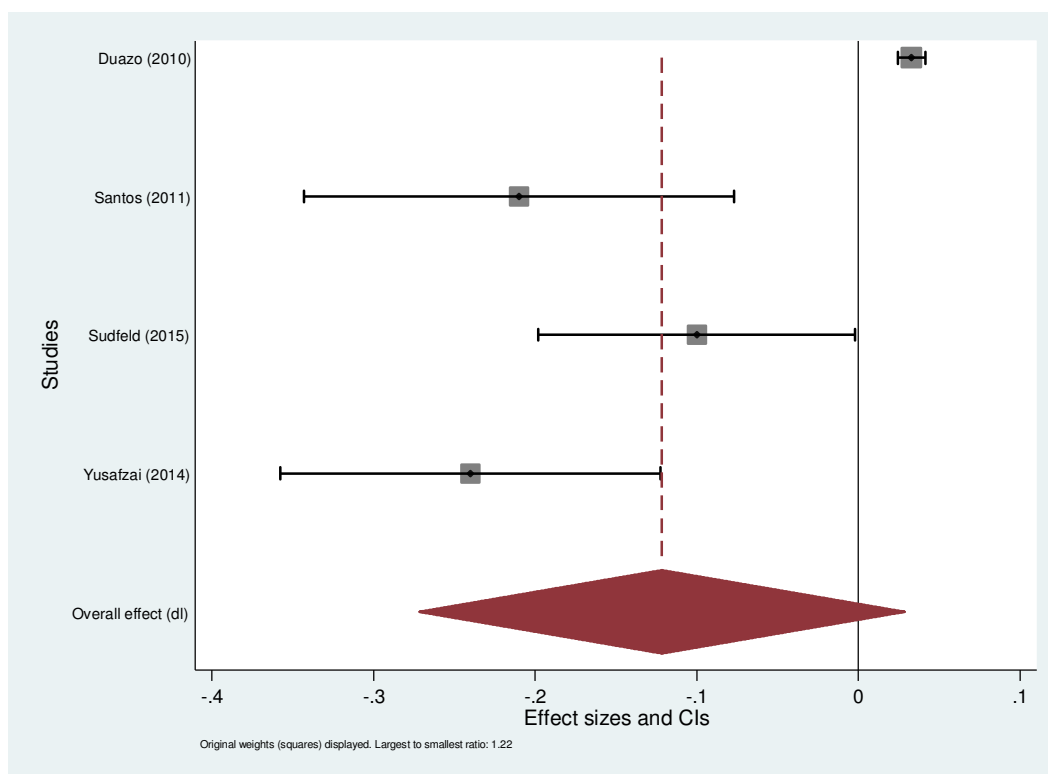

**Figure 33: Association between lack of access to sanitation (reference: access to sanitation) and language development.**

1  
2  
3  
4  
5  
6  
7  
8  
9  
10  
11  
12  
13  
14  
15  
16  
17  
18  
19  
20  
21  
22  
23  
24  
25  
26  
27  
28  
29  
30  
31  
32  
33  
34  
35  
36  
37  
38  
39  
40  
41  
42  
43  
44  
45  
46  
47  
48  
49  
50  
51  
52  
53  
54  
55  
56  
57  
58  
59  
60

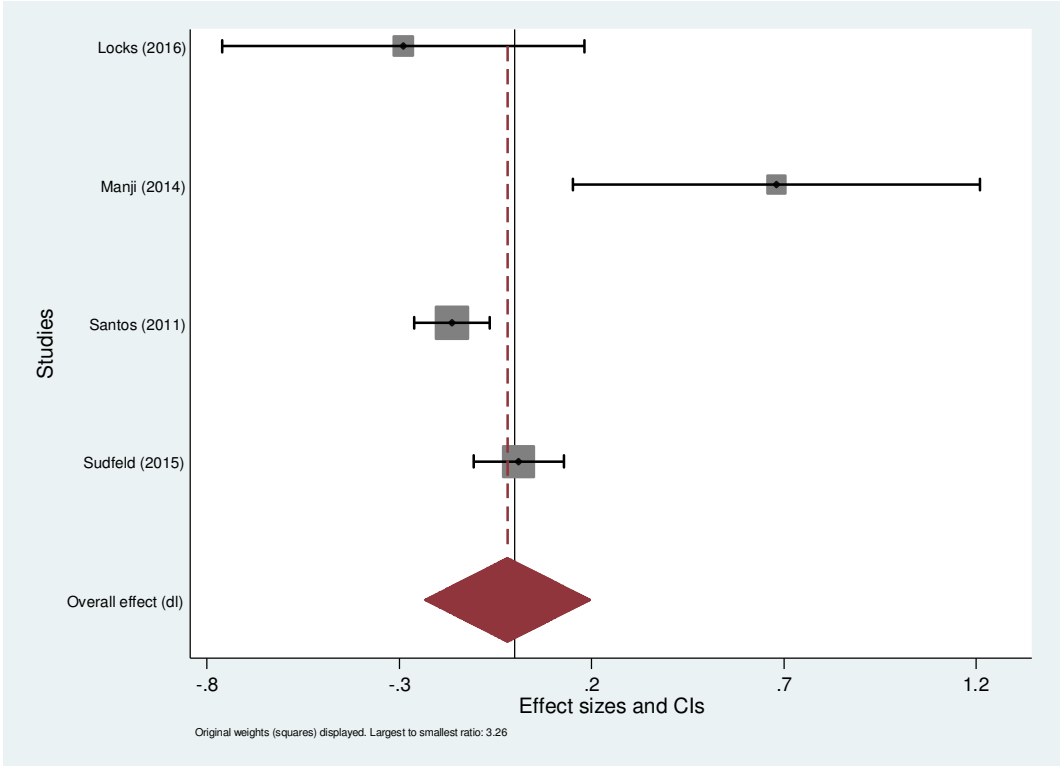

**Figure 34: Association between preterm-AGA (reference: term-AGA) and language development.**

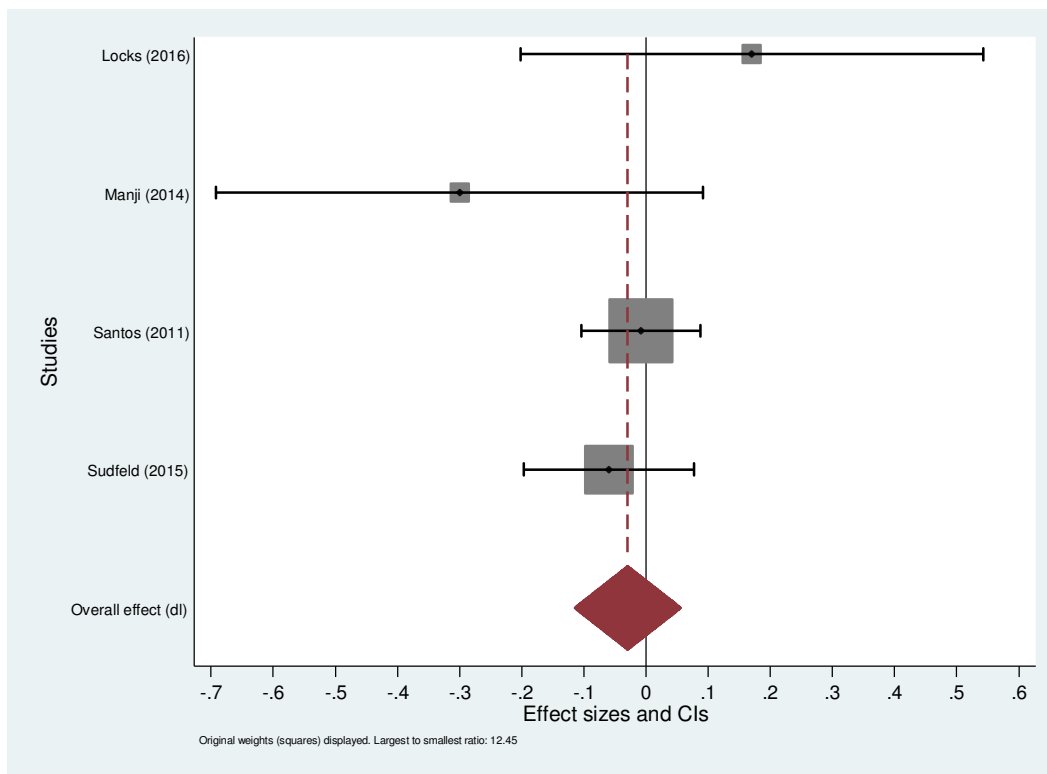

**Figure 35: Association between term-SGA (reference: term-AGA) and language development.**

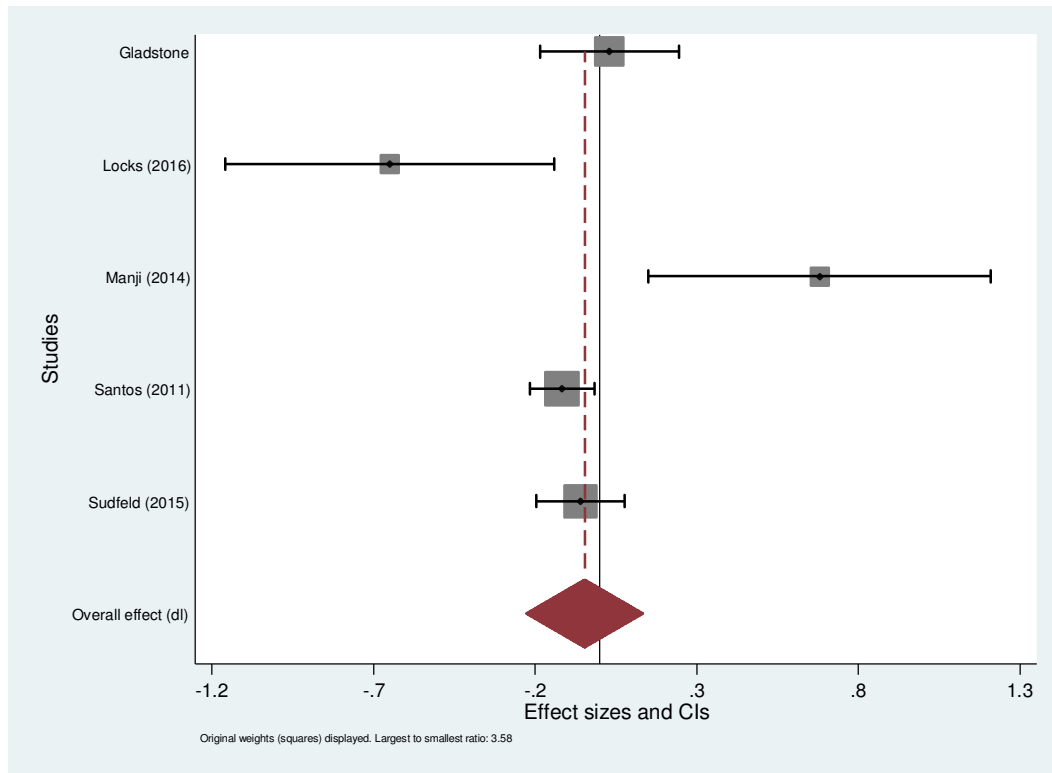

Figure 36: Association between late preterm birth, 34-37 weeks (reference: term) and language development.

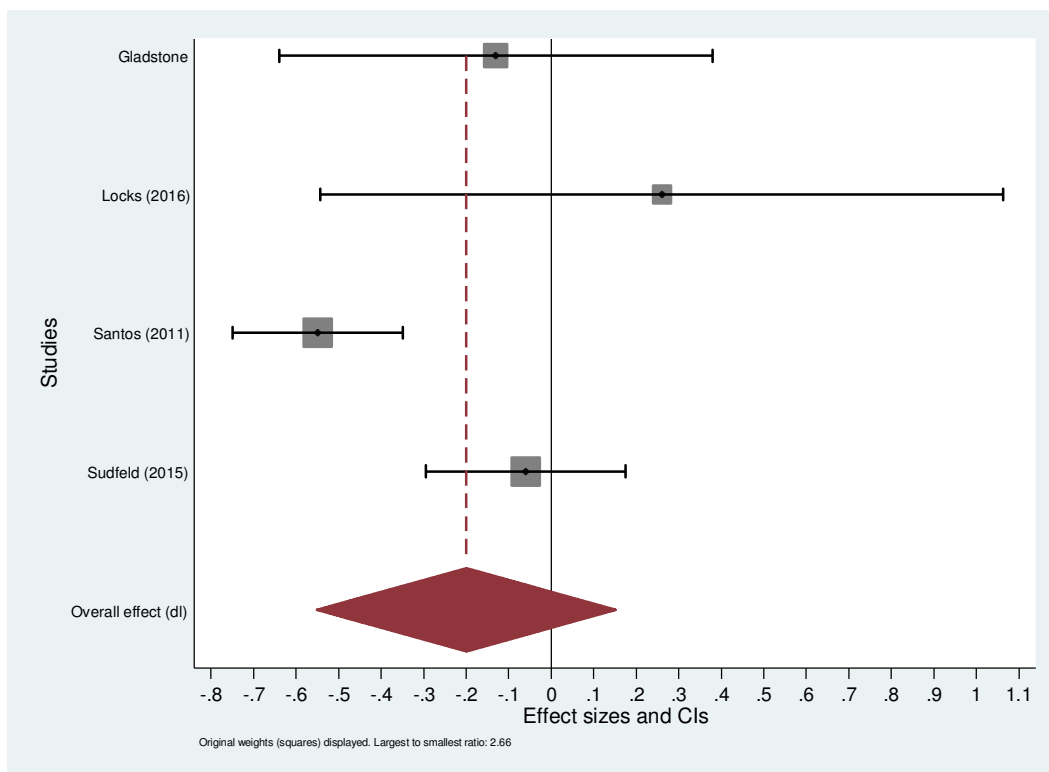

**Figure 37: Association between early preterm birth, < 34 weeks (reference: term) and language development.**

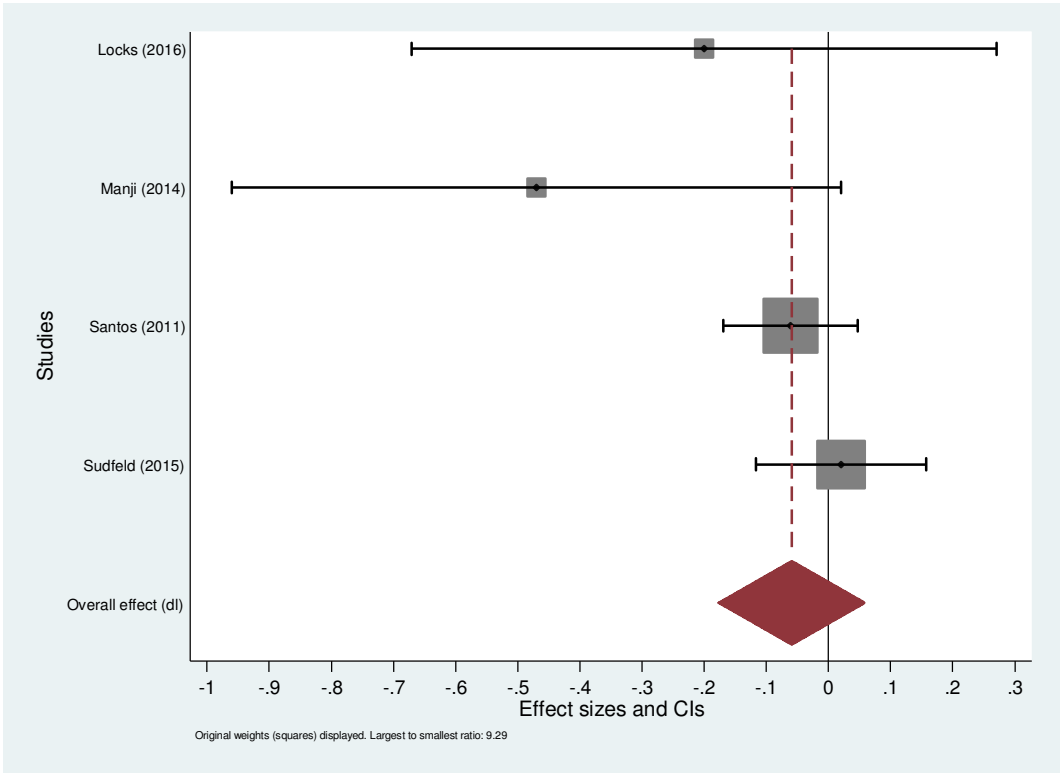

**Figure 38: Association between moderate SGA (reference: AGA) and language development.**

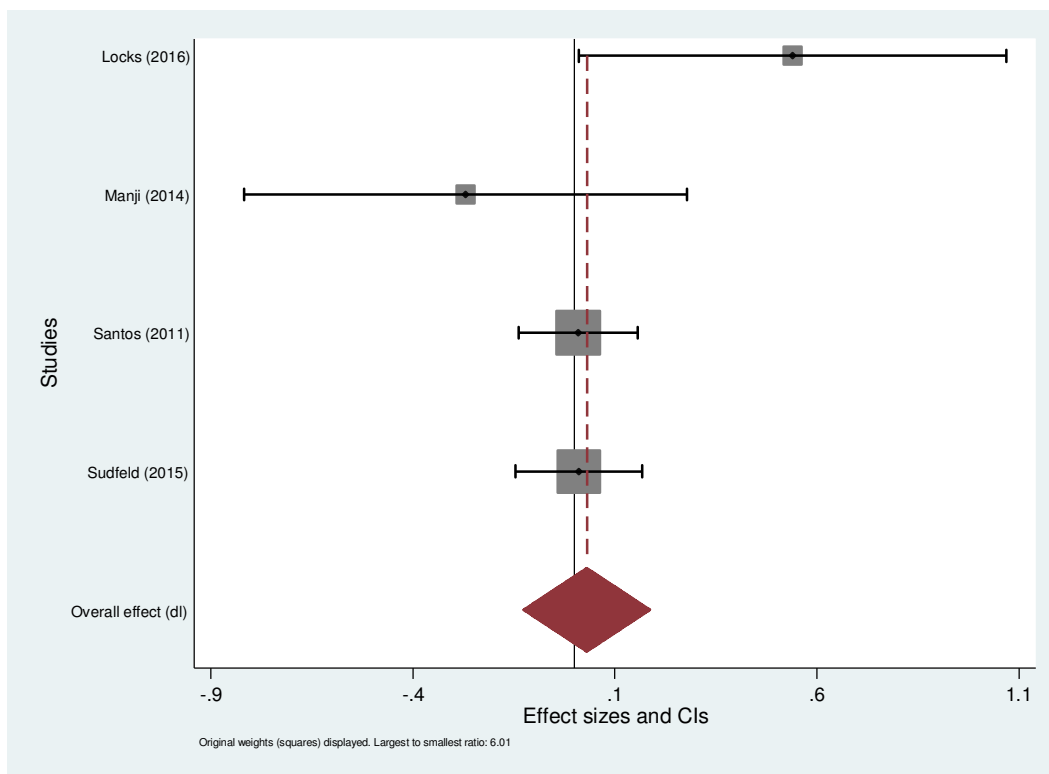

Figure 39: Association between severe SGA (reference: AGA) and language development.



4. Parental Risk Factors on Child's Cognitive Development

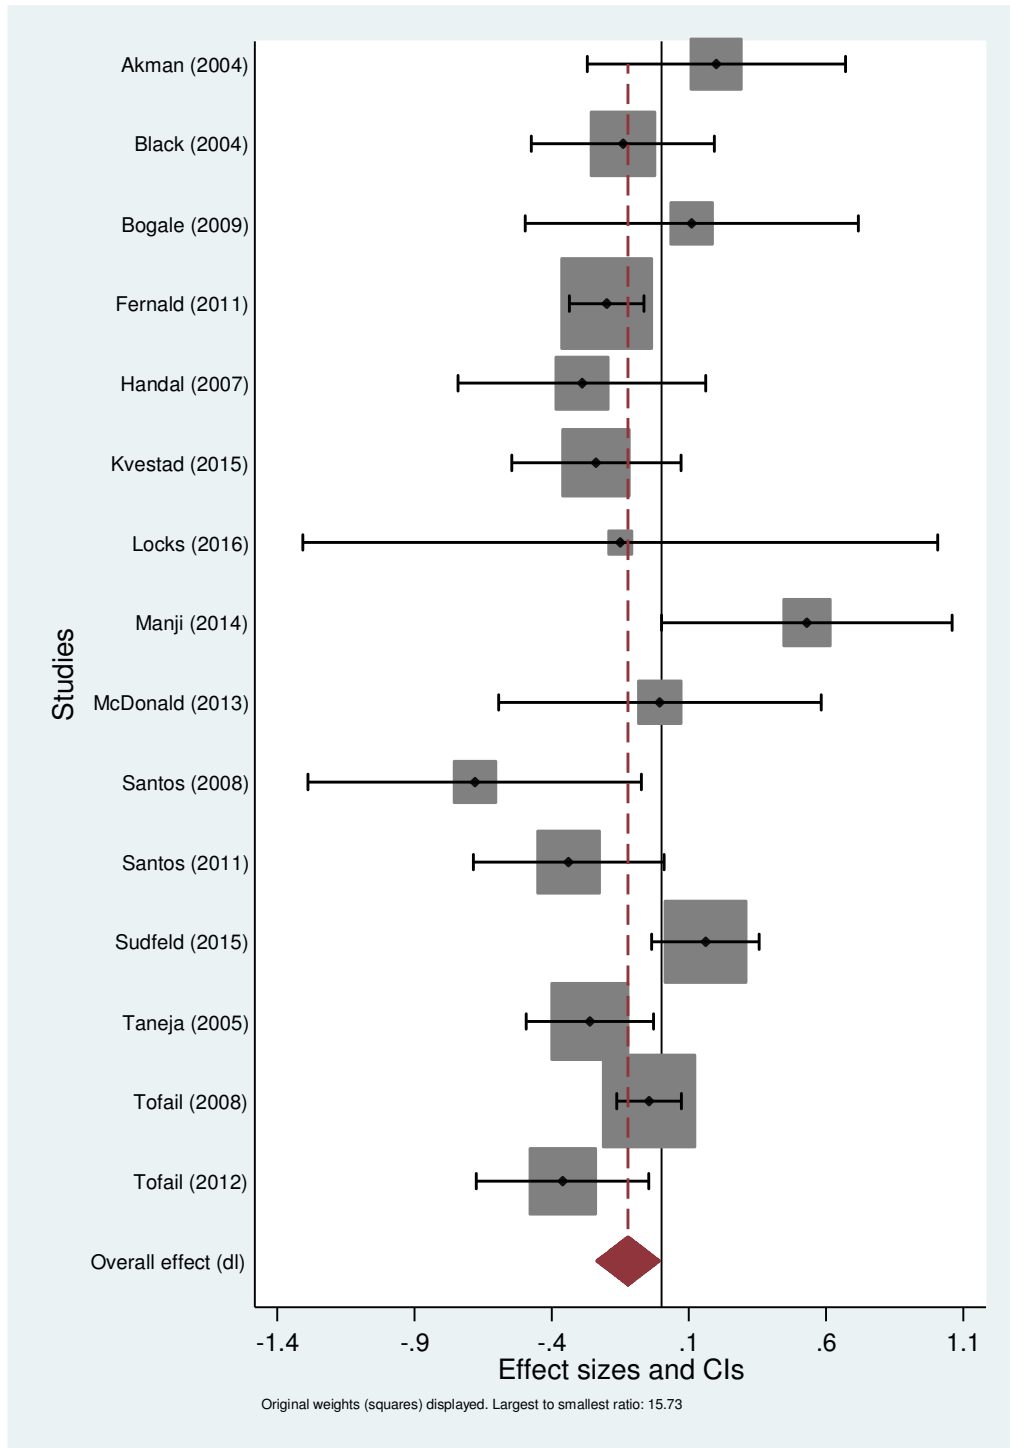

Figure 40: Association between no maternal education (reference: primary education) and cognitive development.

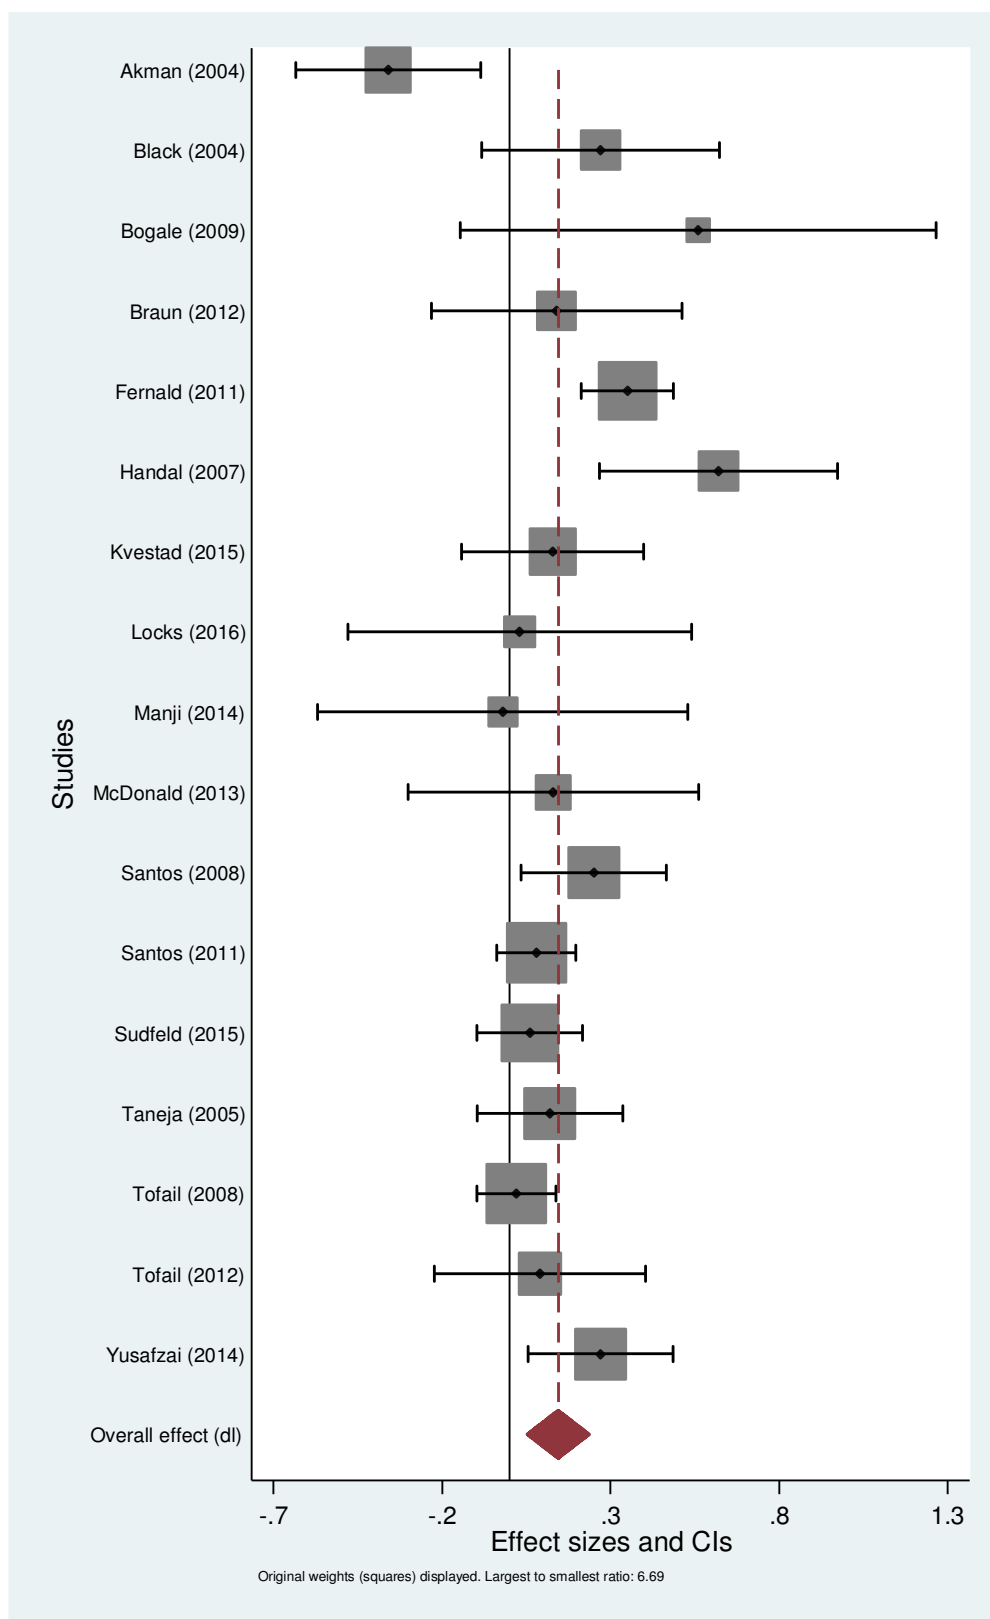

Figure 41: Association between maternal secondary education (reference: primary education) and cognitive development.

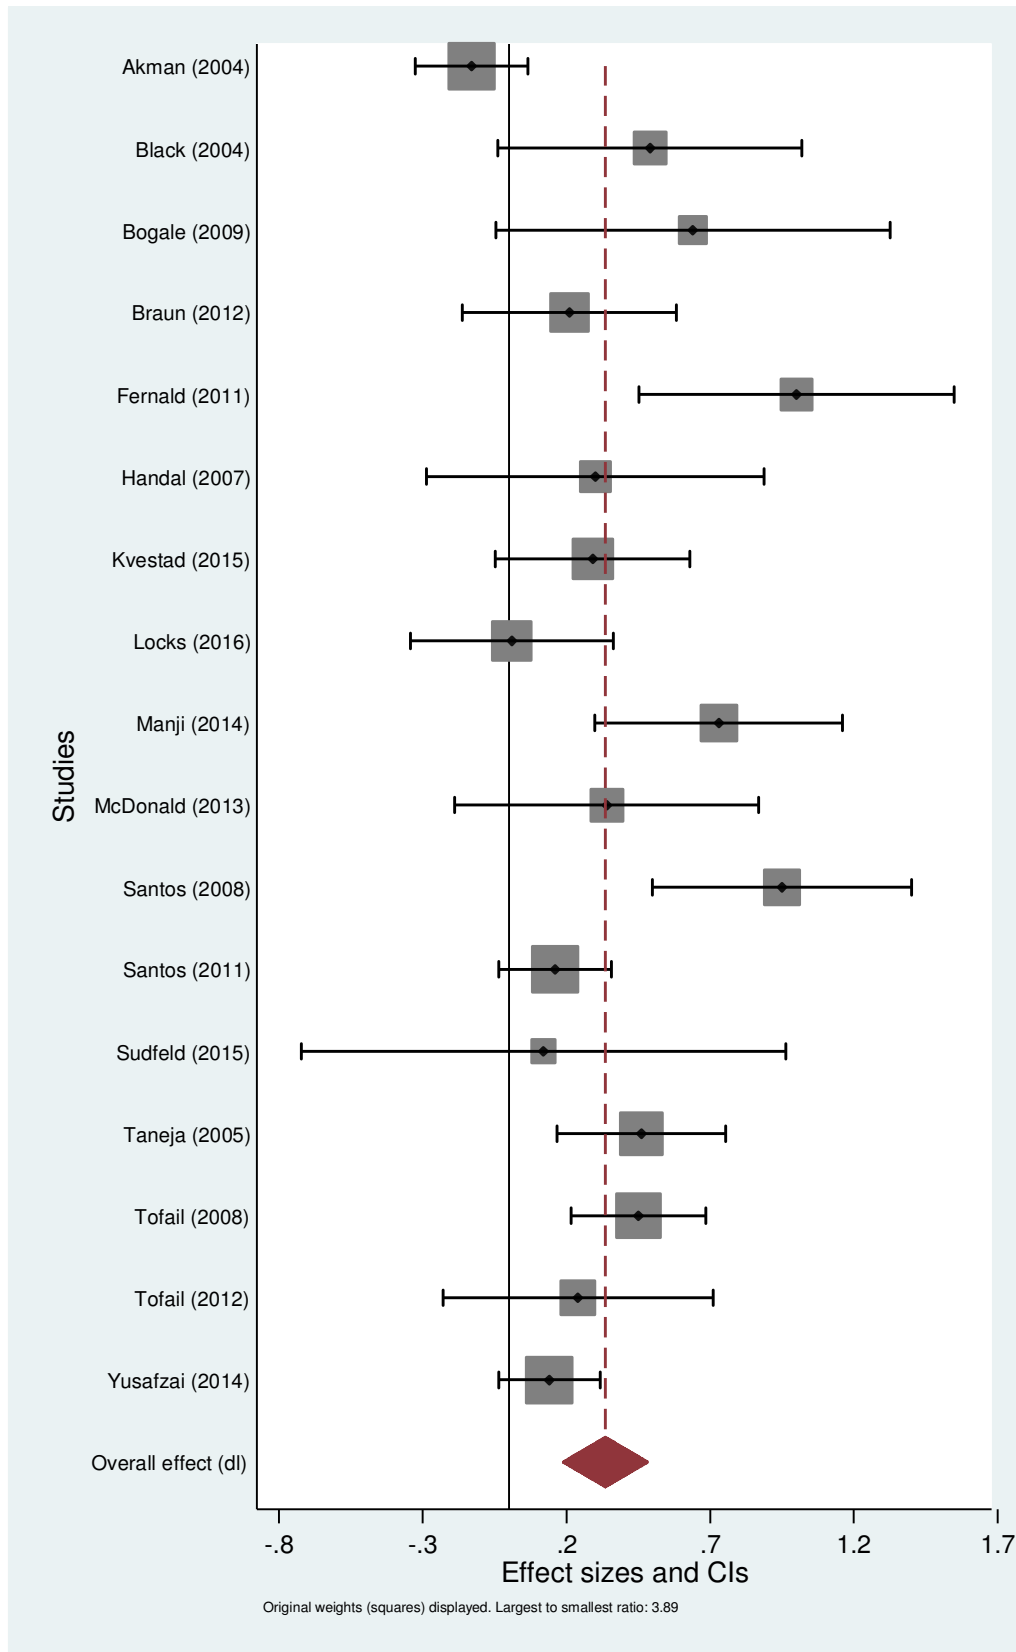

Figure 42: Association between maternal higher education (reference: primary education) and cognitive development.

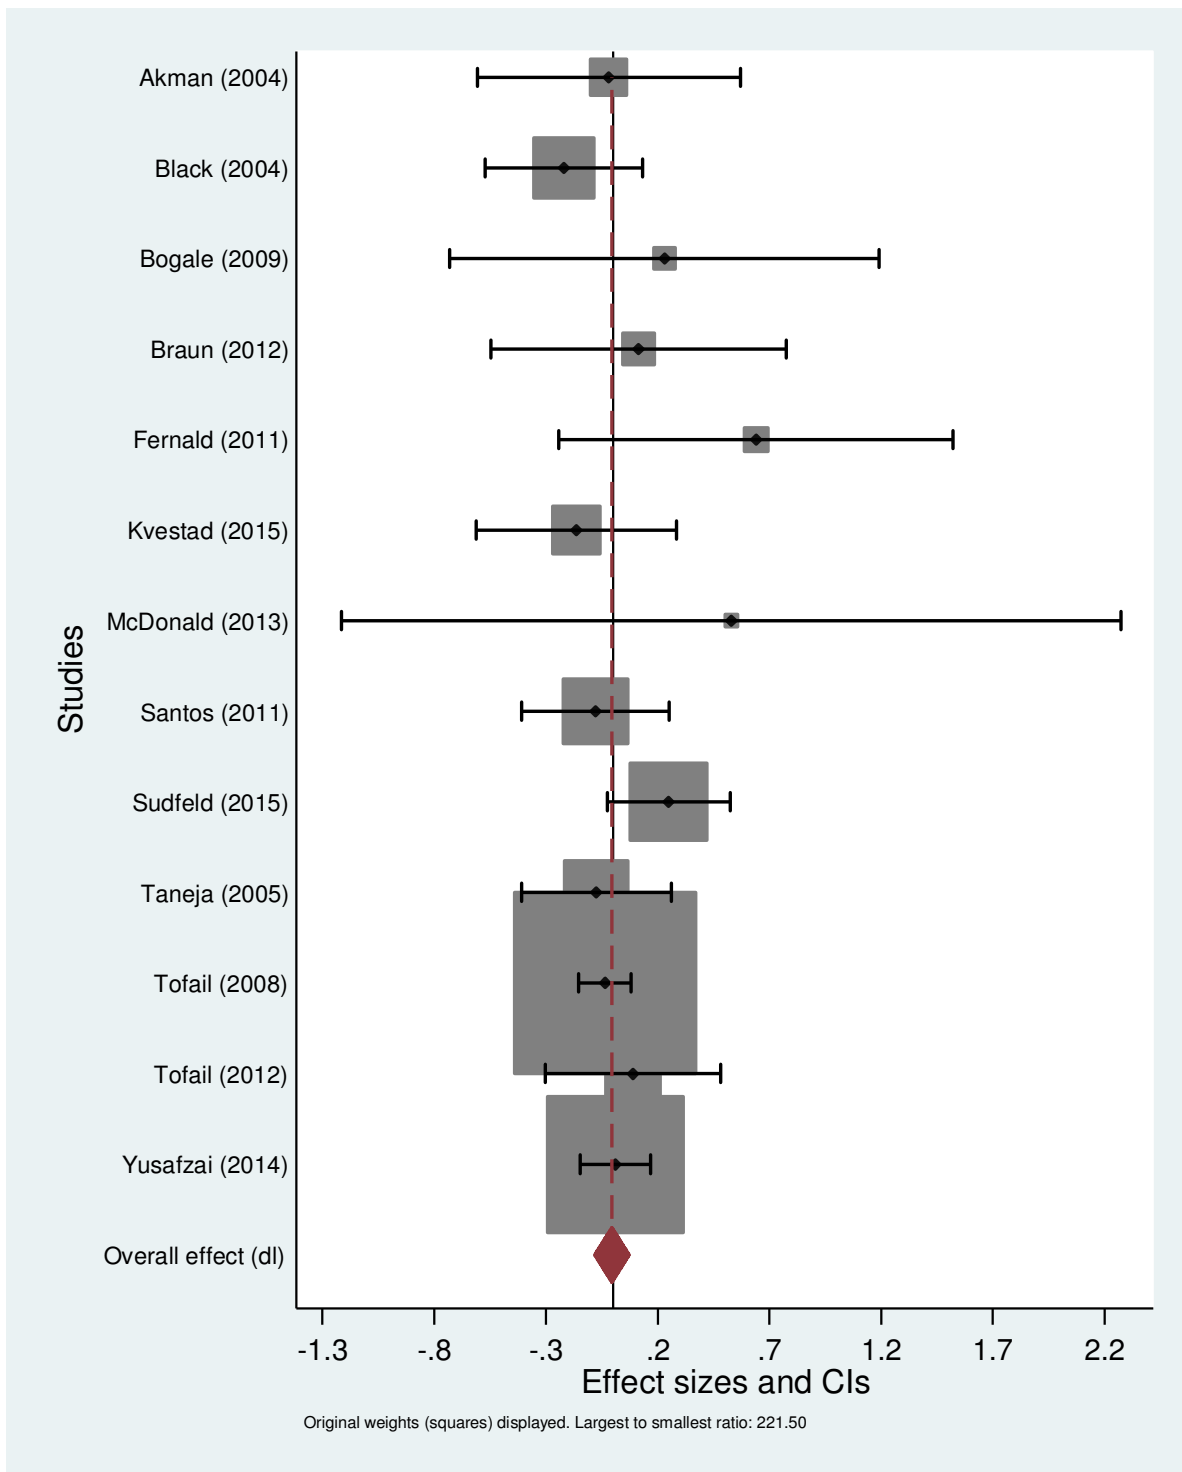

Figure 43: Association between no paternal education (reference: primary education) and cognitive development.

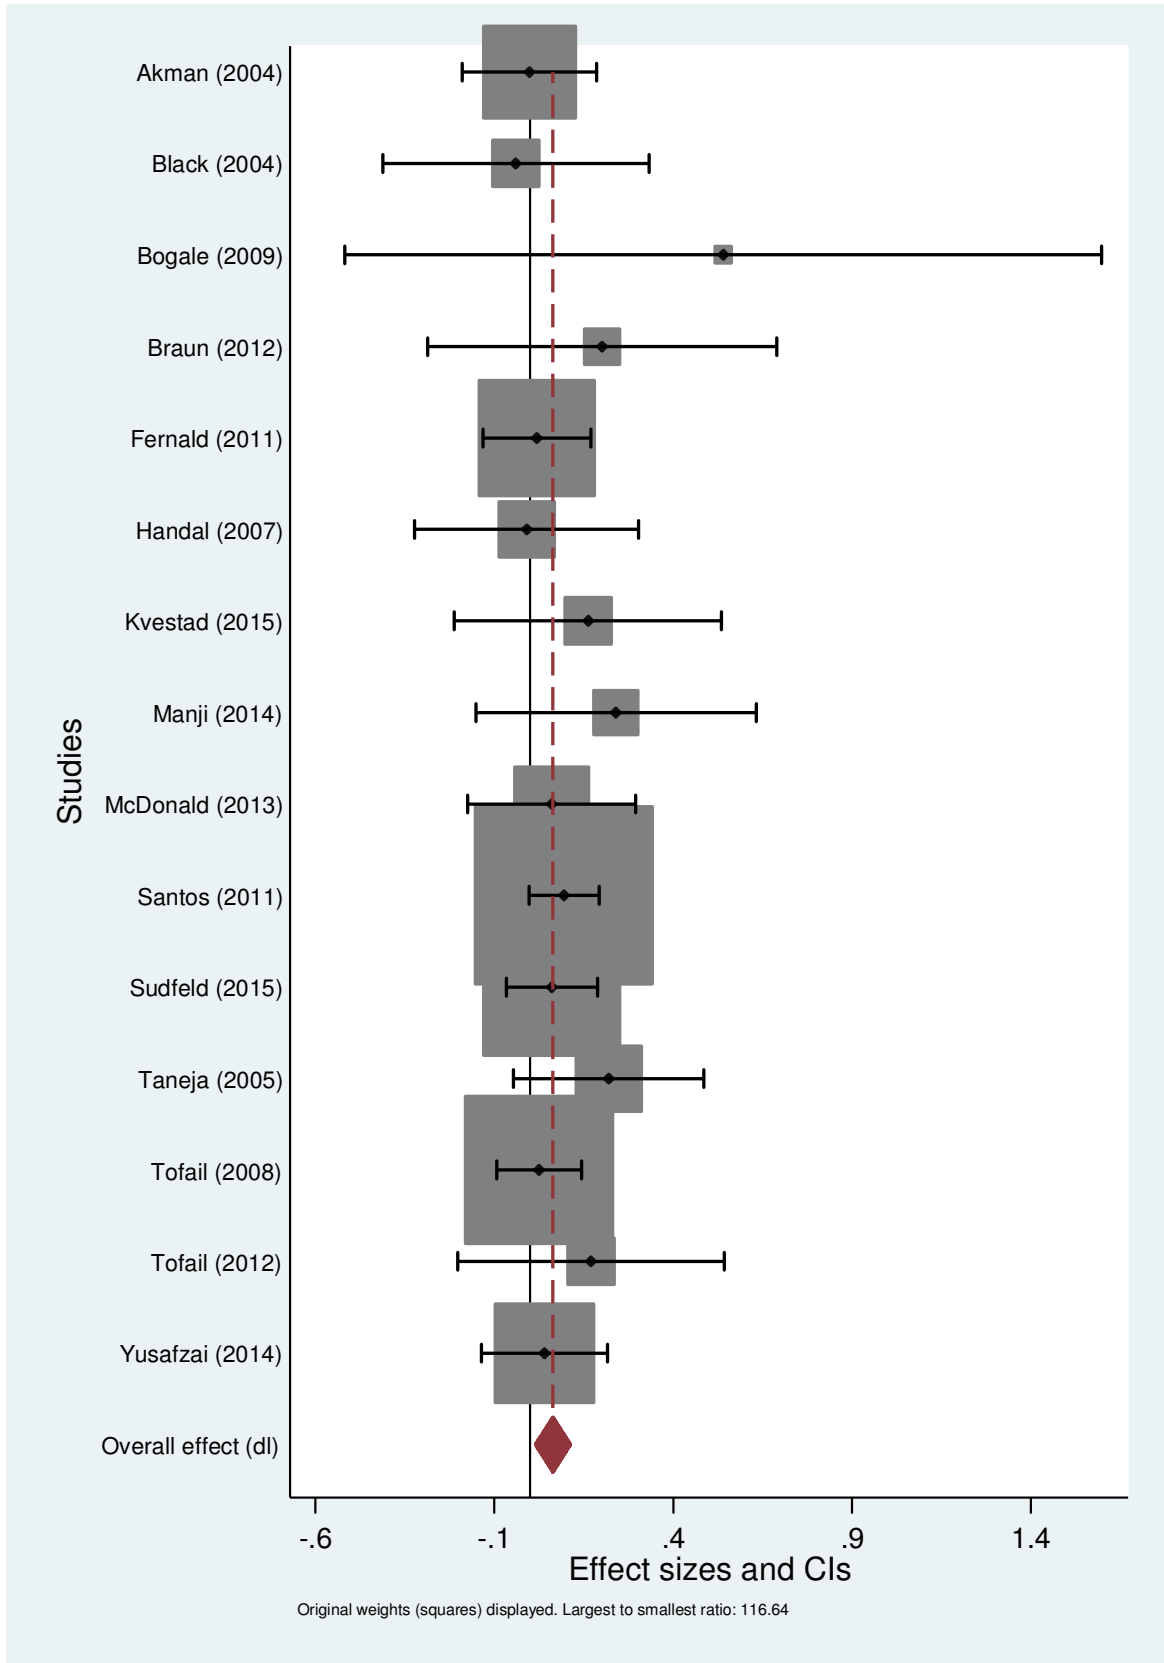

Figure 44: Association between paternal secondary education (reference: primary education) and cognitive development.

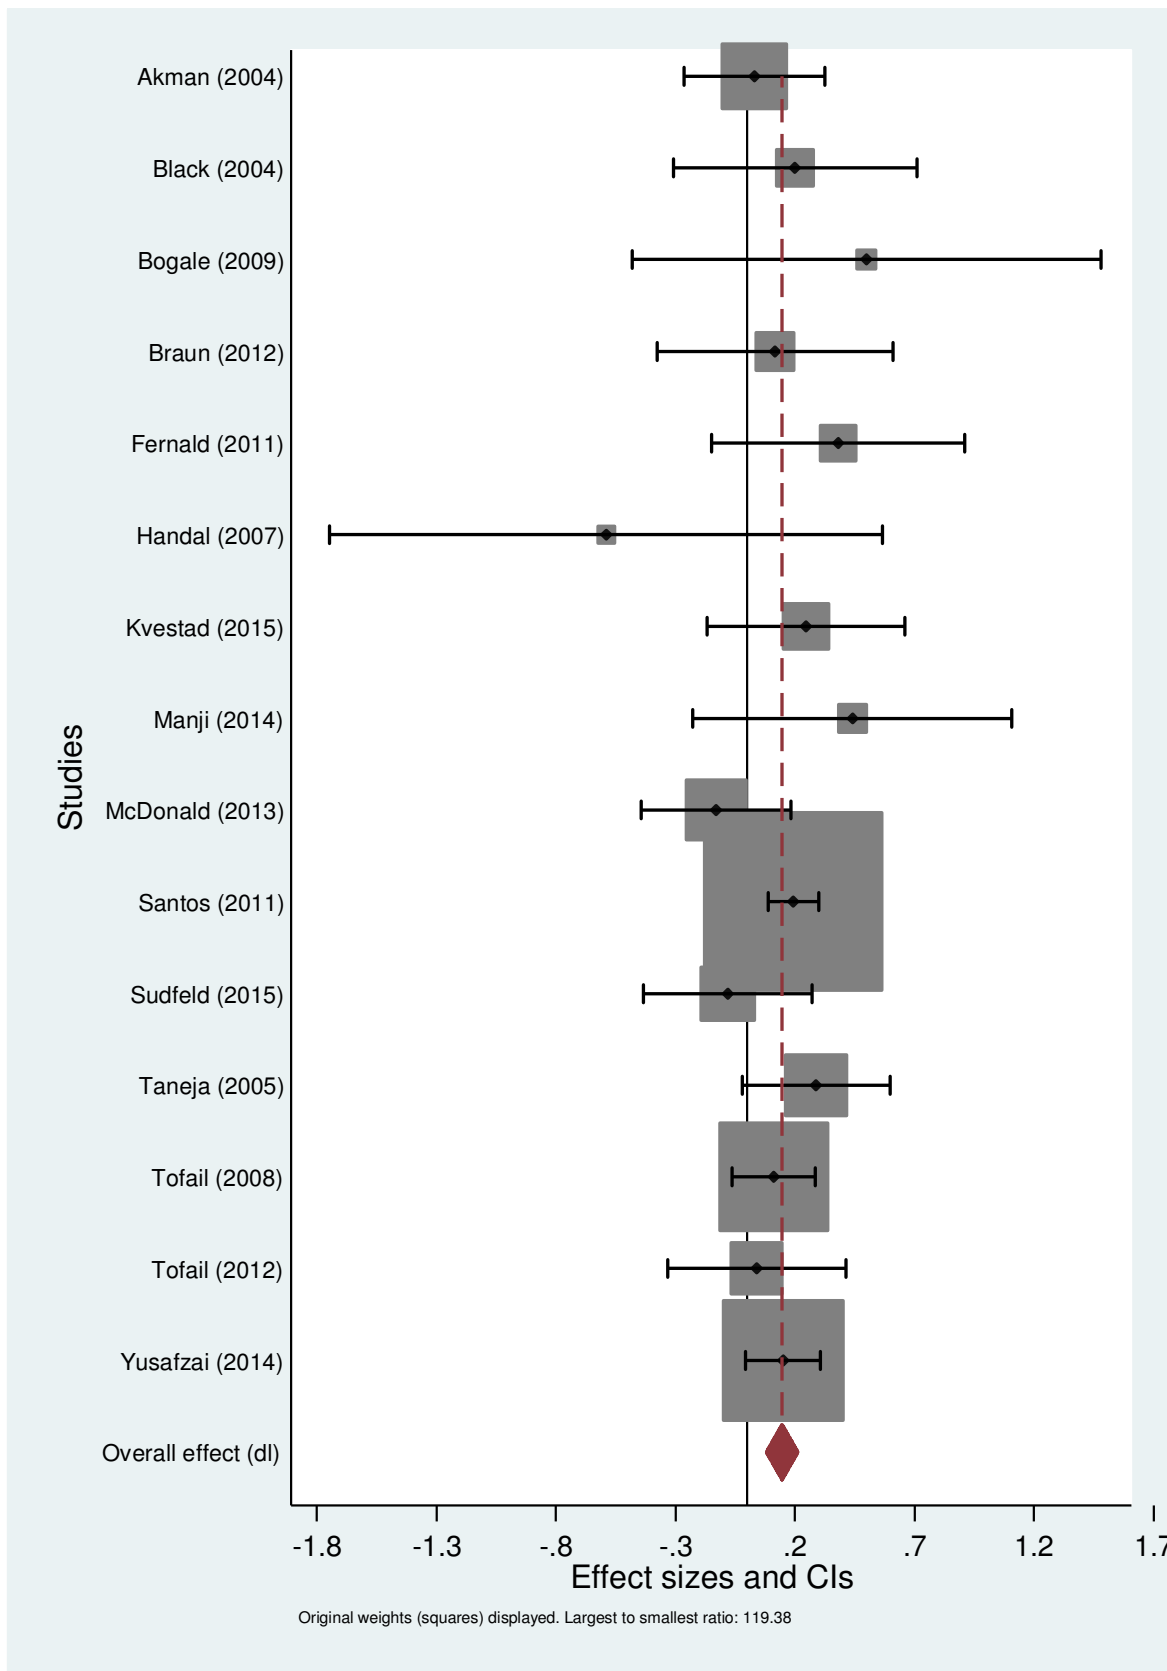

Figure 45: Association between paternal higher education (reference: primary education) and cognitive development.

1  
2  
3  
4  
5  
6  
7  
8  
9  
10  
11  
12  
13  
14  
15  
16  
17  
18  
19  
20  
21  
22  
23  
24  
25  
26  
27  
28  
29  
30  
31  
32  
33  
34  
35  
36  
37  
38  
39  
40  
41  
42  
43  
44  
45  
46  
47  
48  
49  
50  
51  
52  
53  
54  
55  
56  
57  
58  
59  
60

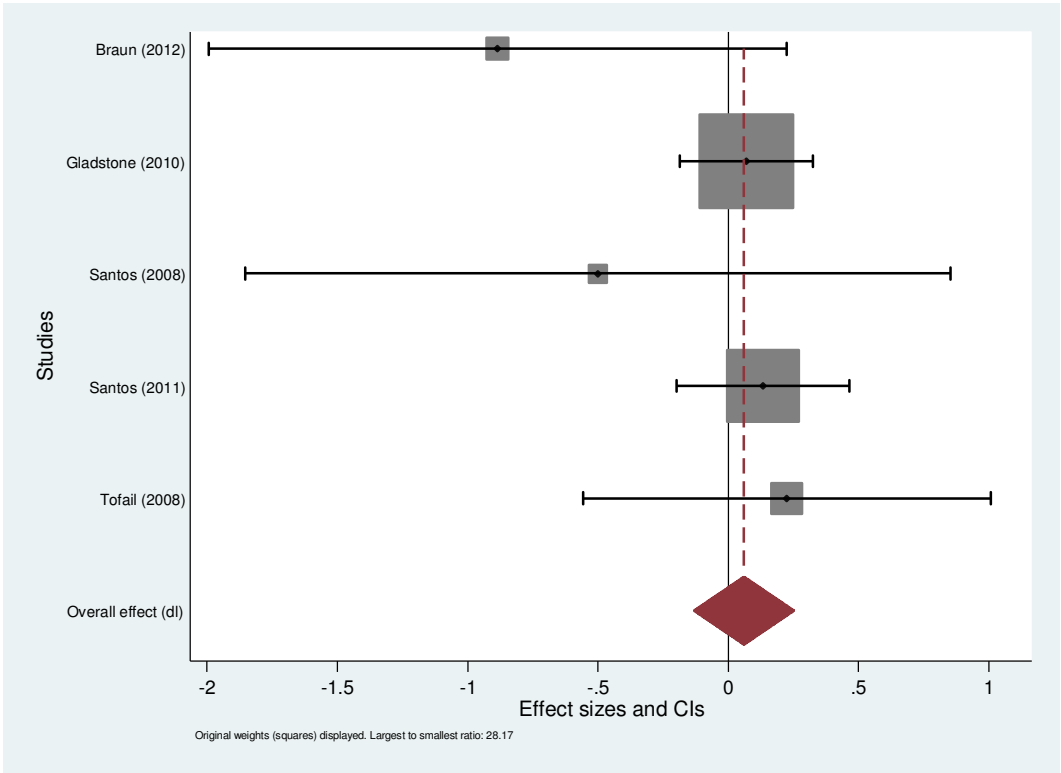

**Figure 46: Association between maternal ages < 15 (reference: ages 20-34) and cognitive development.**

1  
2  
3  
4  
5  
6  
7  
8  
9  
10  
11  
12  
13  
14  
15  
16  
17  
18  
19  
20  
21  
22  
23  
24  
25  
26  
27  
28  
29  
30  
31  
32  
33  
34  
35  
36  
37  
38  
39  
40  
41  
42  
43  
44  
45  
46  
47  
48  
49  
50  
51  
52  
53  
54  
55  
56  
57  
58  
59  
60

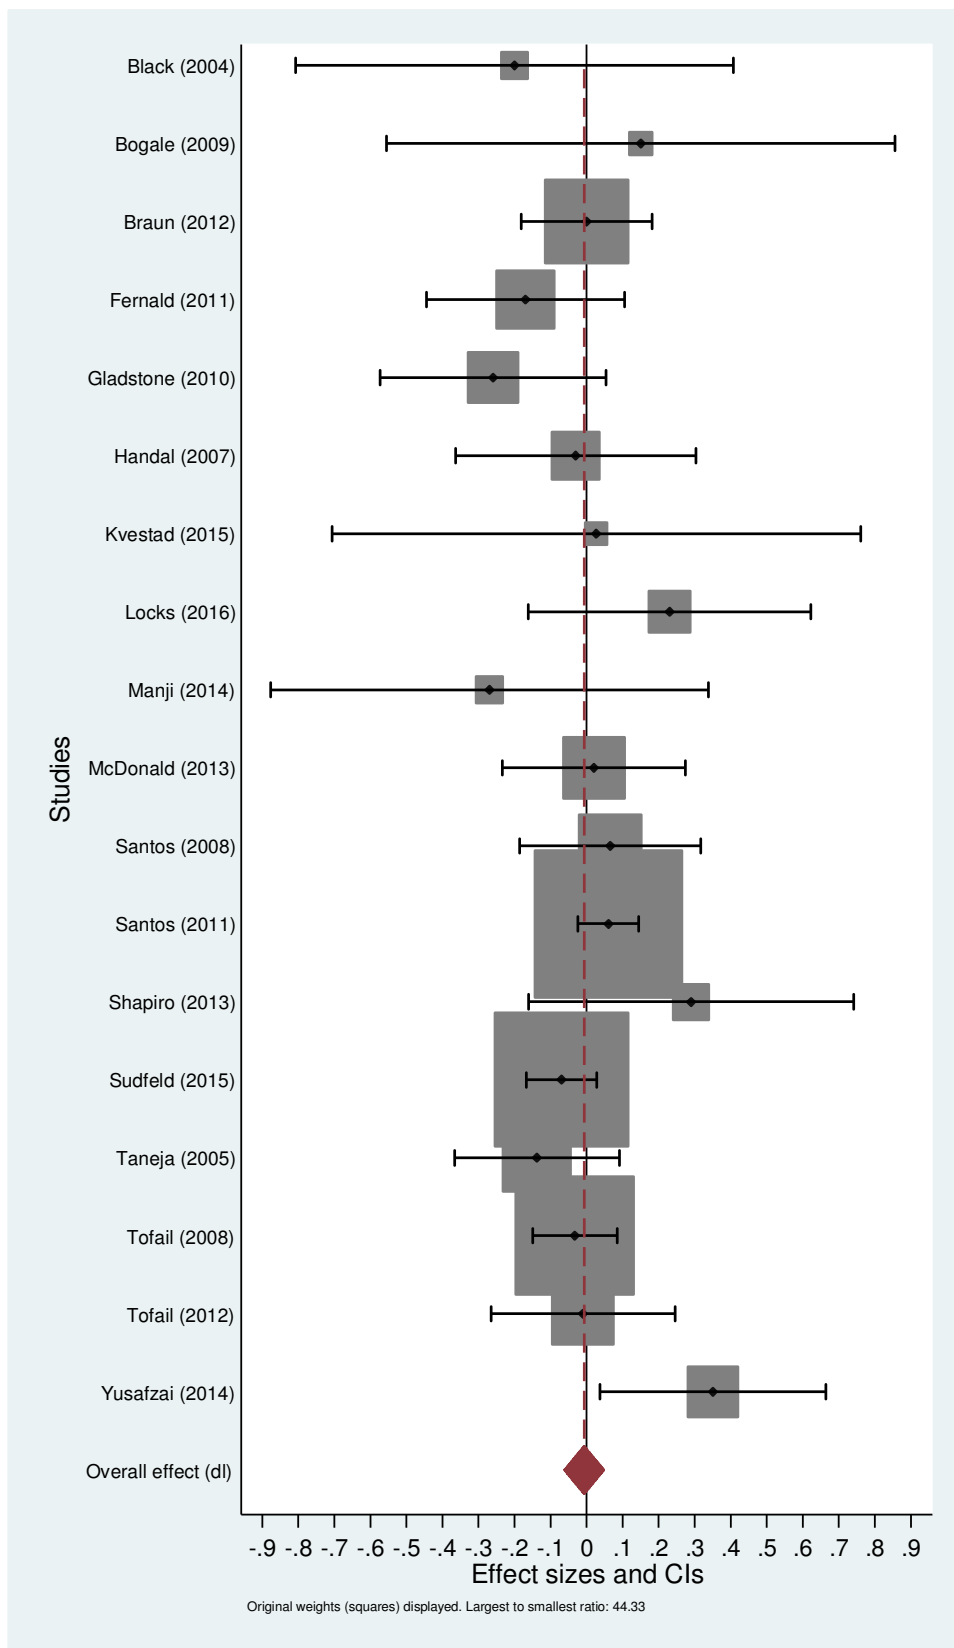

Figure 47: Association between maternal ages 15-20 (reference: ages 20-34) and cognitive development.



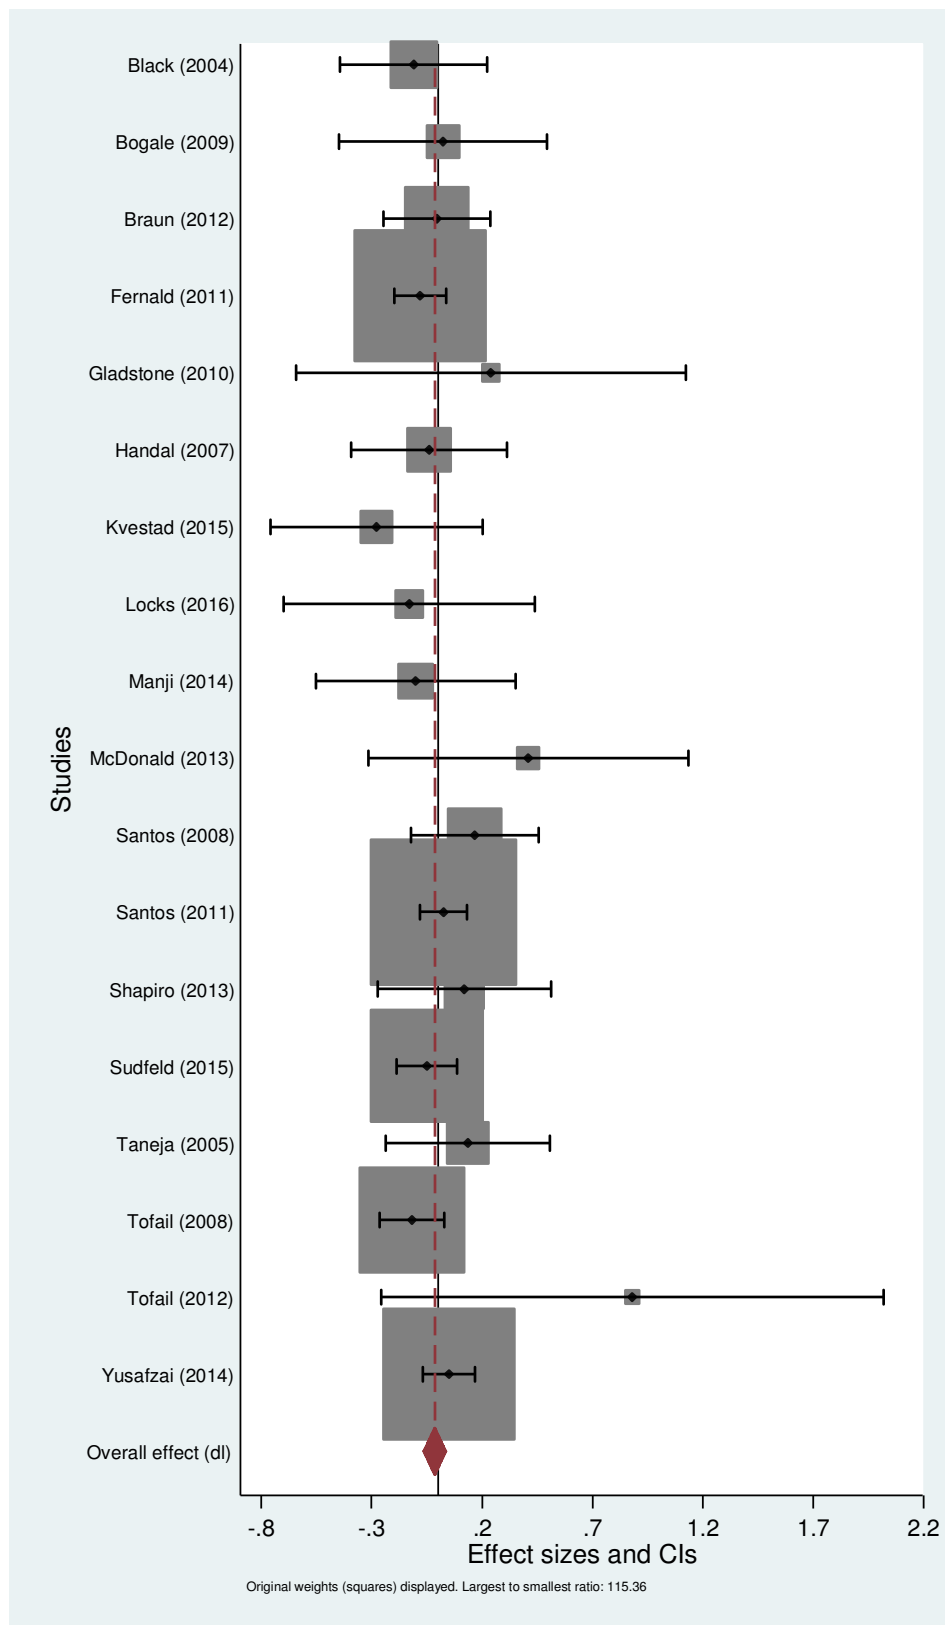

Figure 48: Association between maternal ages >35 (reference: ages 20-34) and cognitive development.

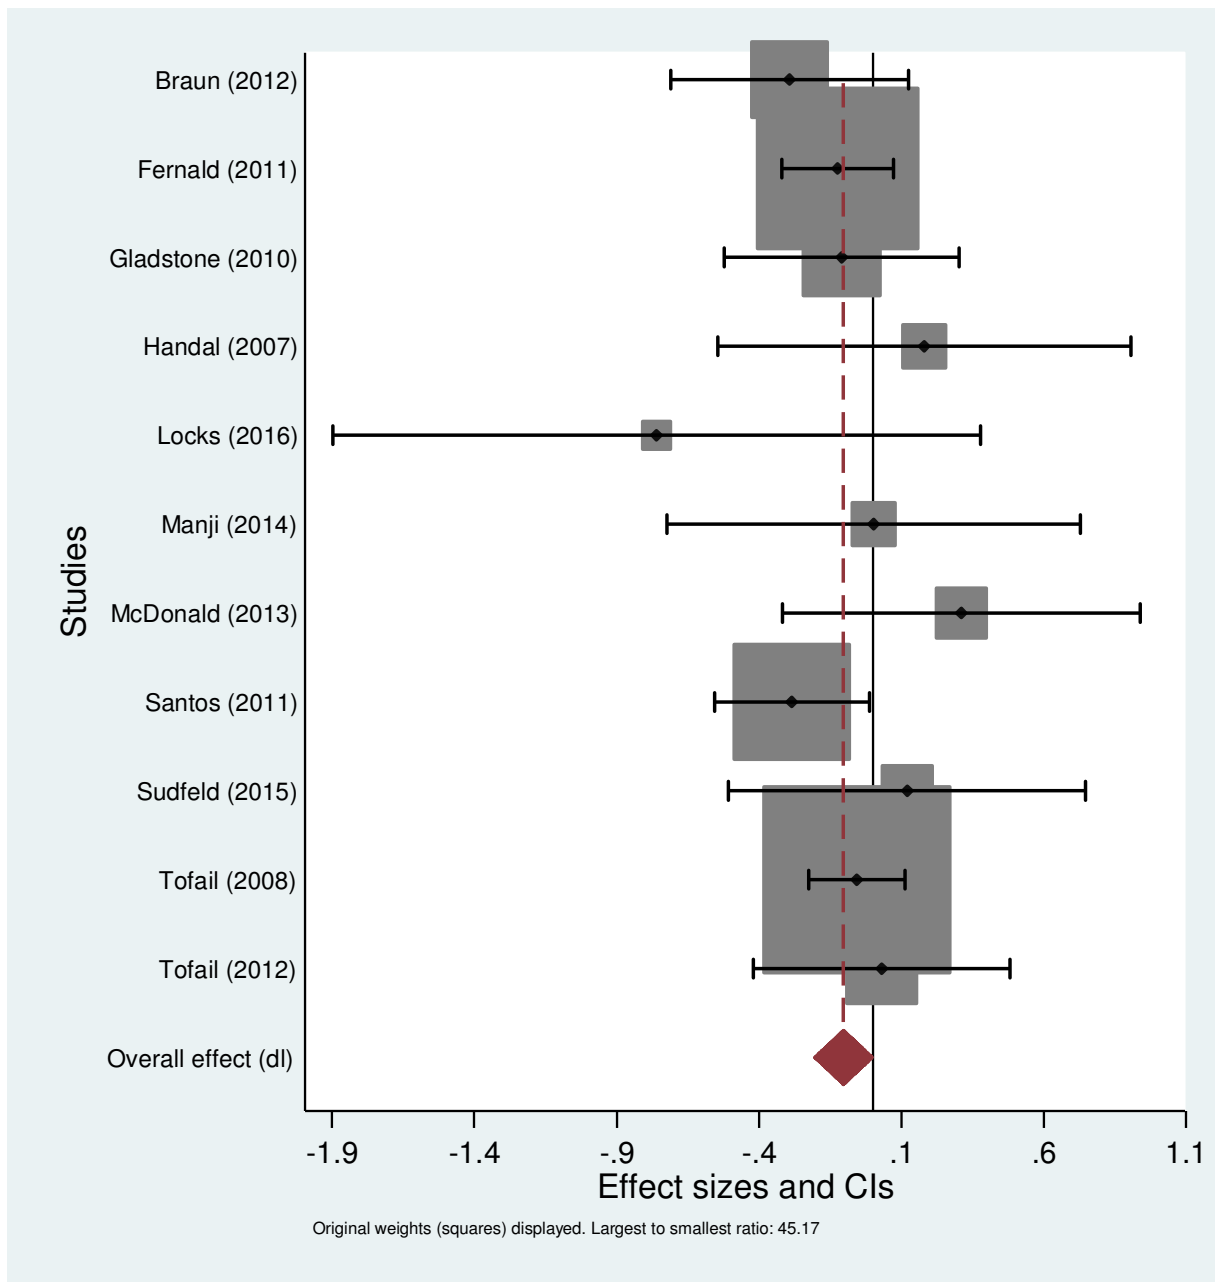

**Figure 49: Association between maternal height < 145cm (reference: >155 cm) and cognitive development.**

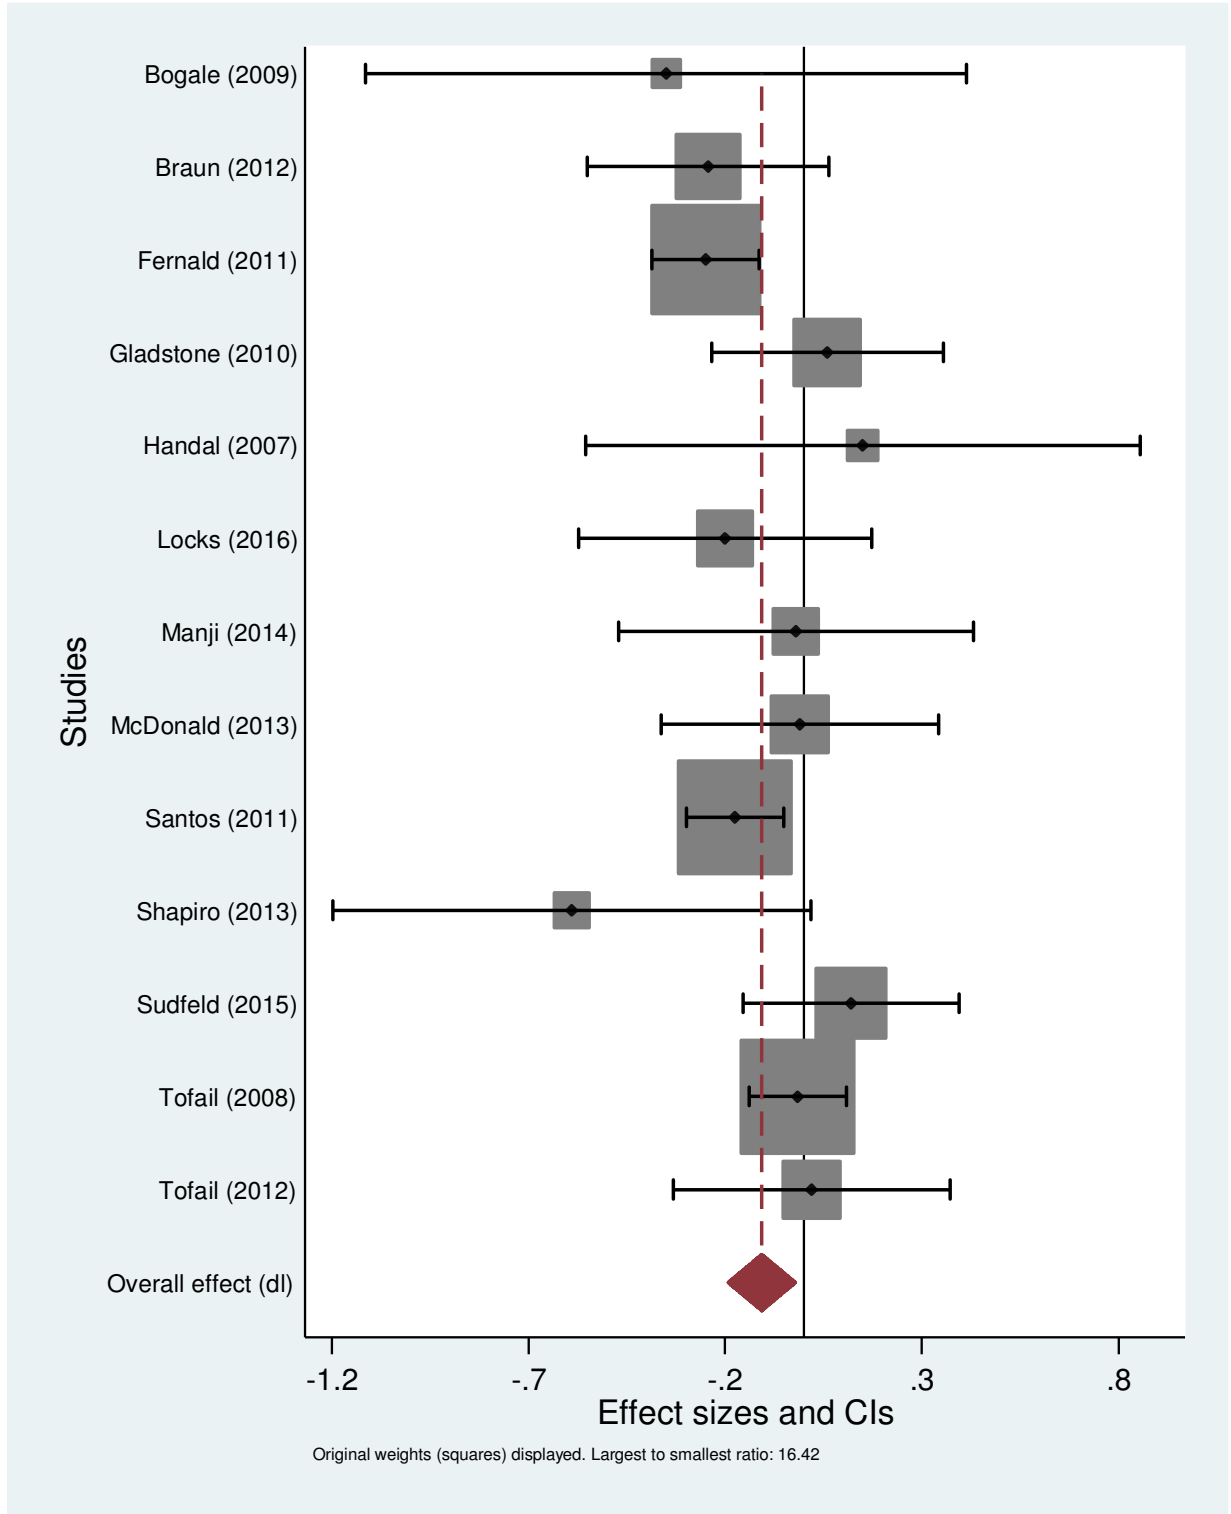

Figure 50: Association between maternal height 145-150cm (reference: >155 cm) and cognitive development.

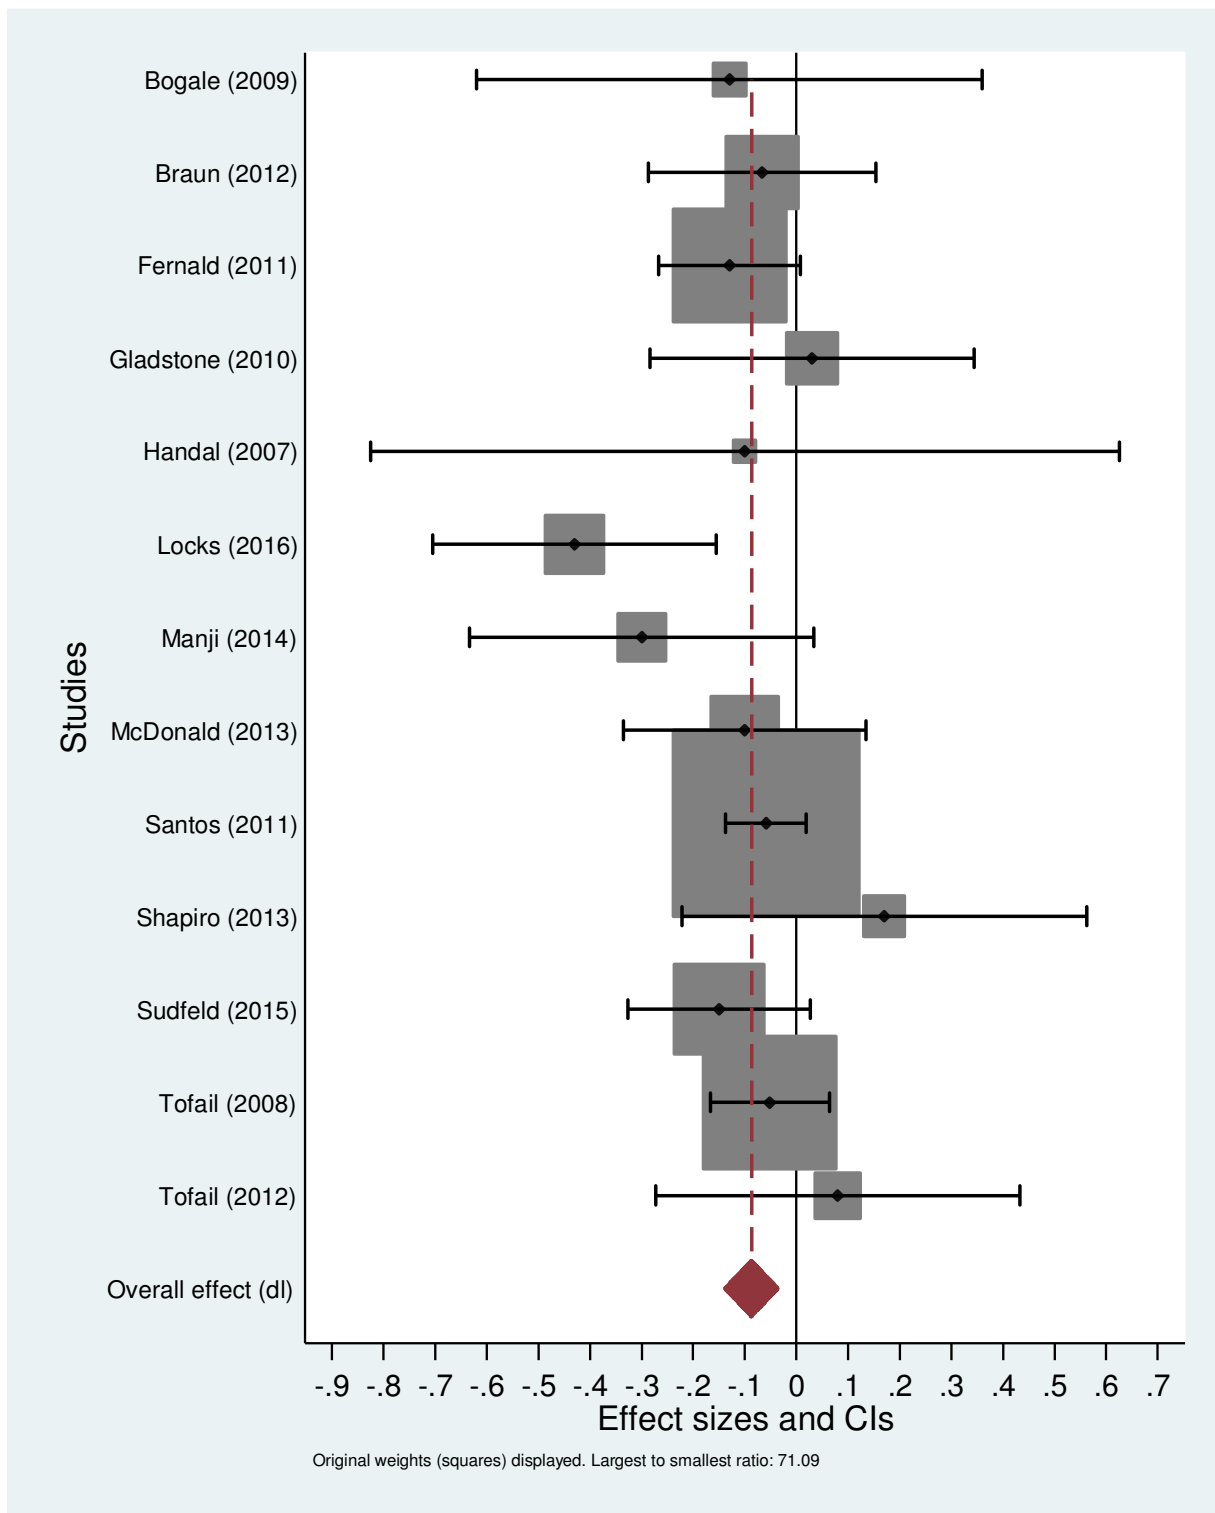

**Figure 51: Association between maternal height 150-155 cm (reference: >155 cm) and cognitive development.**

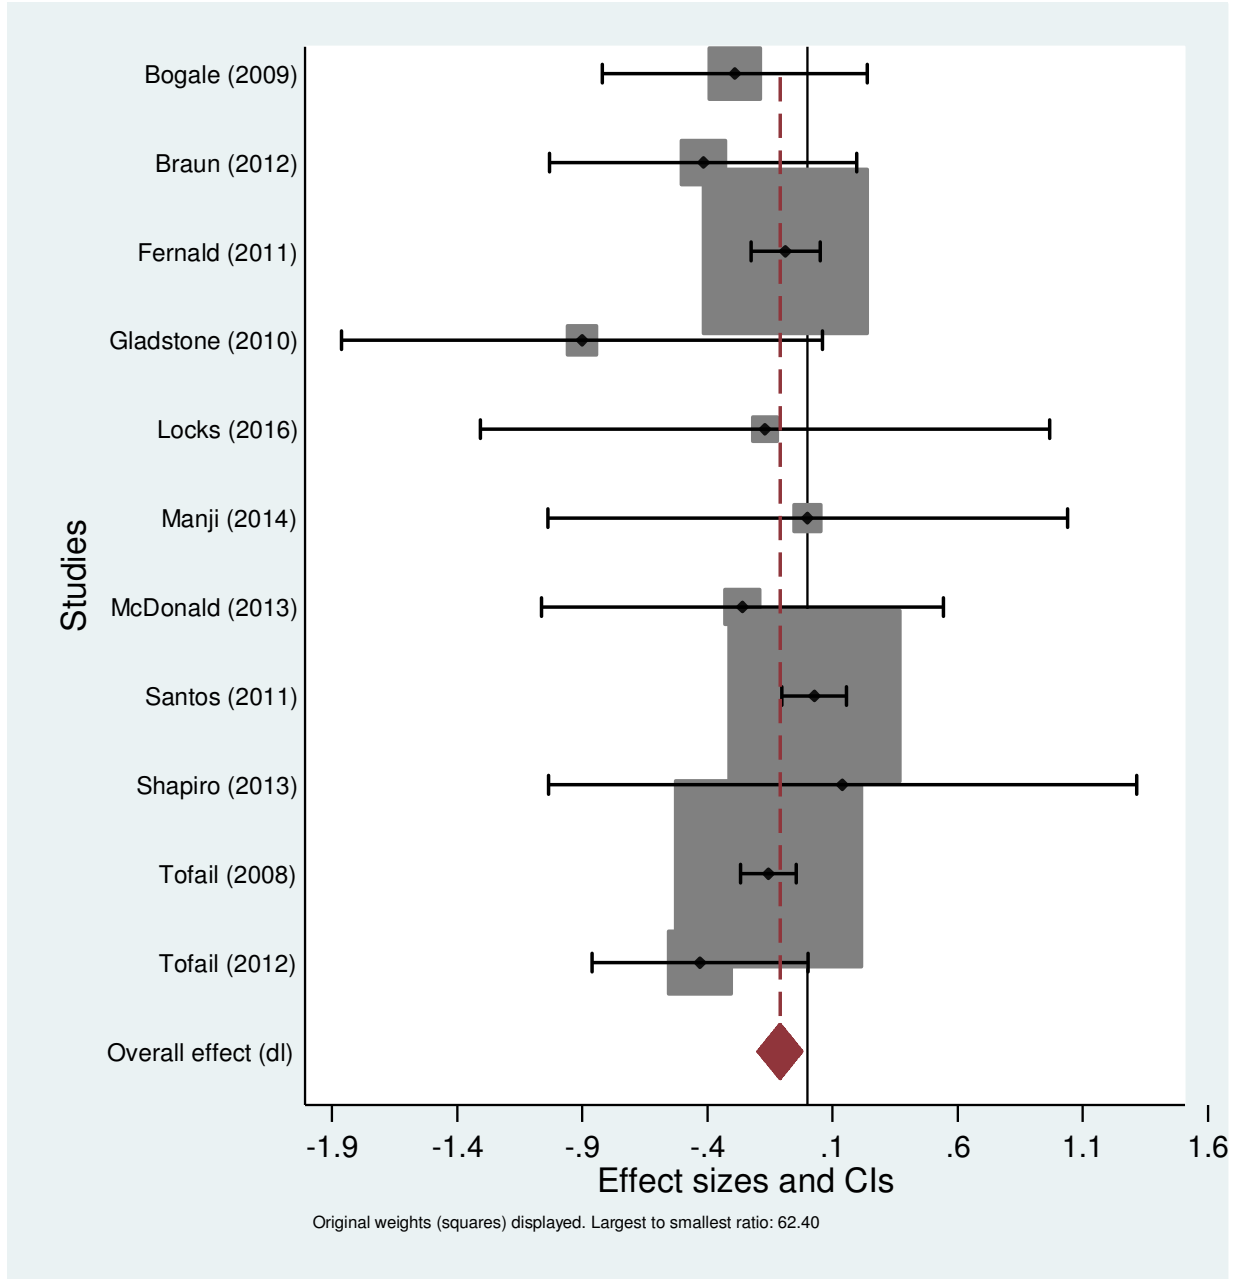

**Figure 52: Association between maternal BMI <18.5 kg/m<sup>2</sup> (reference: 18.5-25) and cognitive development.**

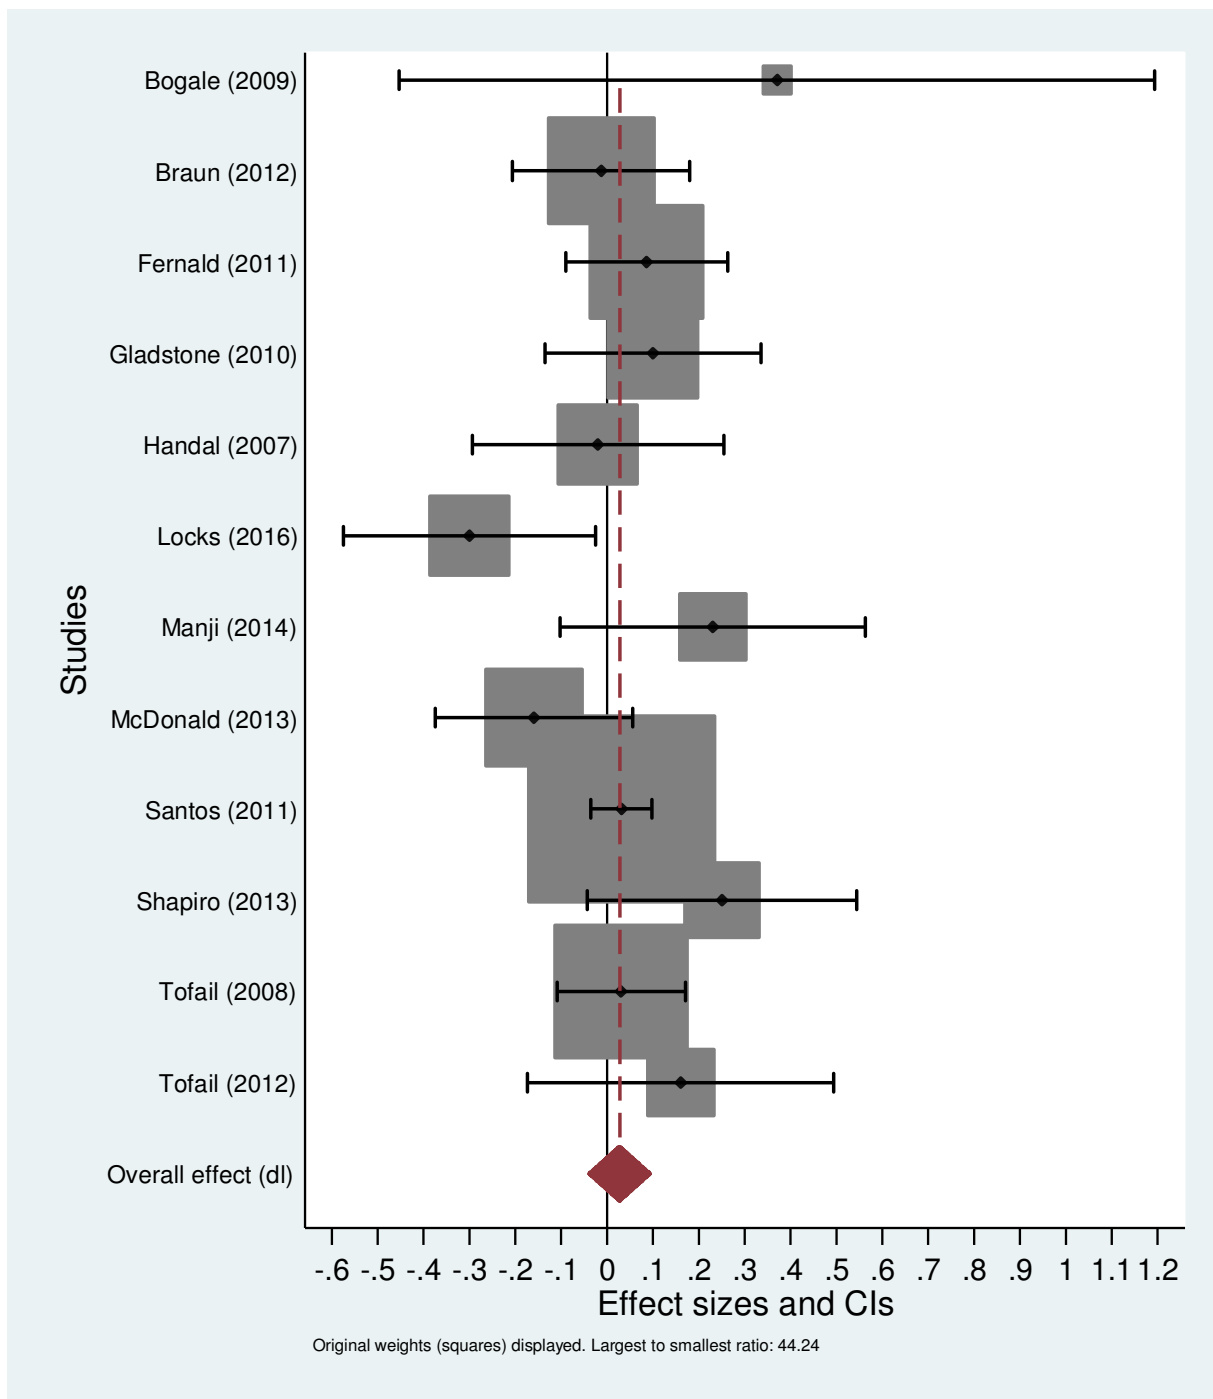

Figure 53: Association between maternal BMI 25-30 kg/m<sup>2</sup> (reference: 18.5-25) and cognitive development.

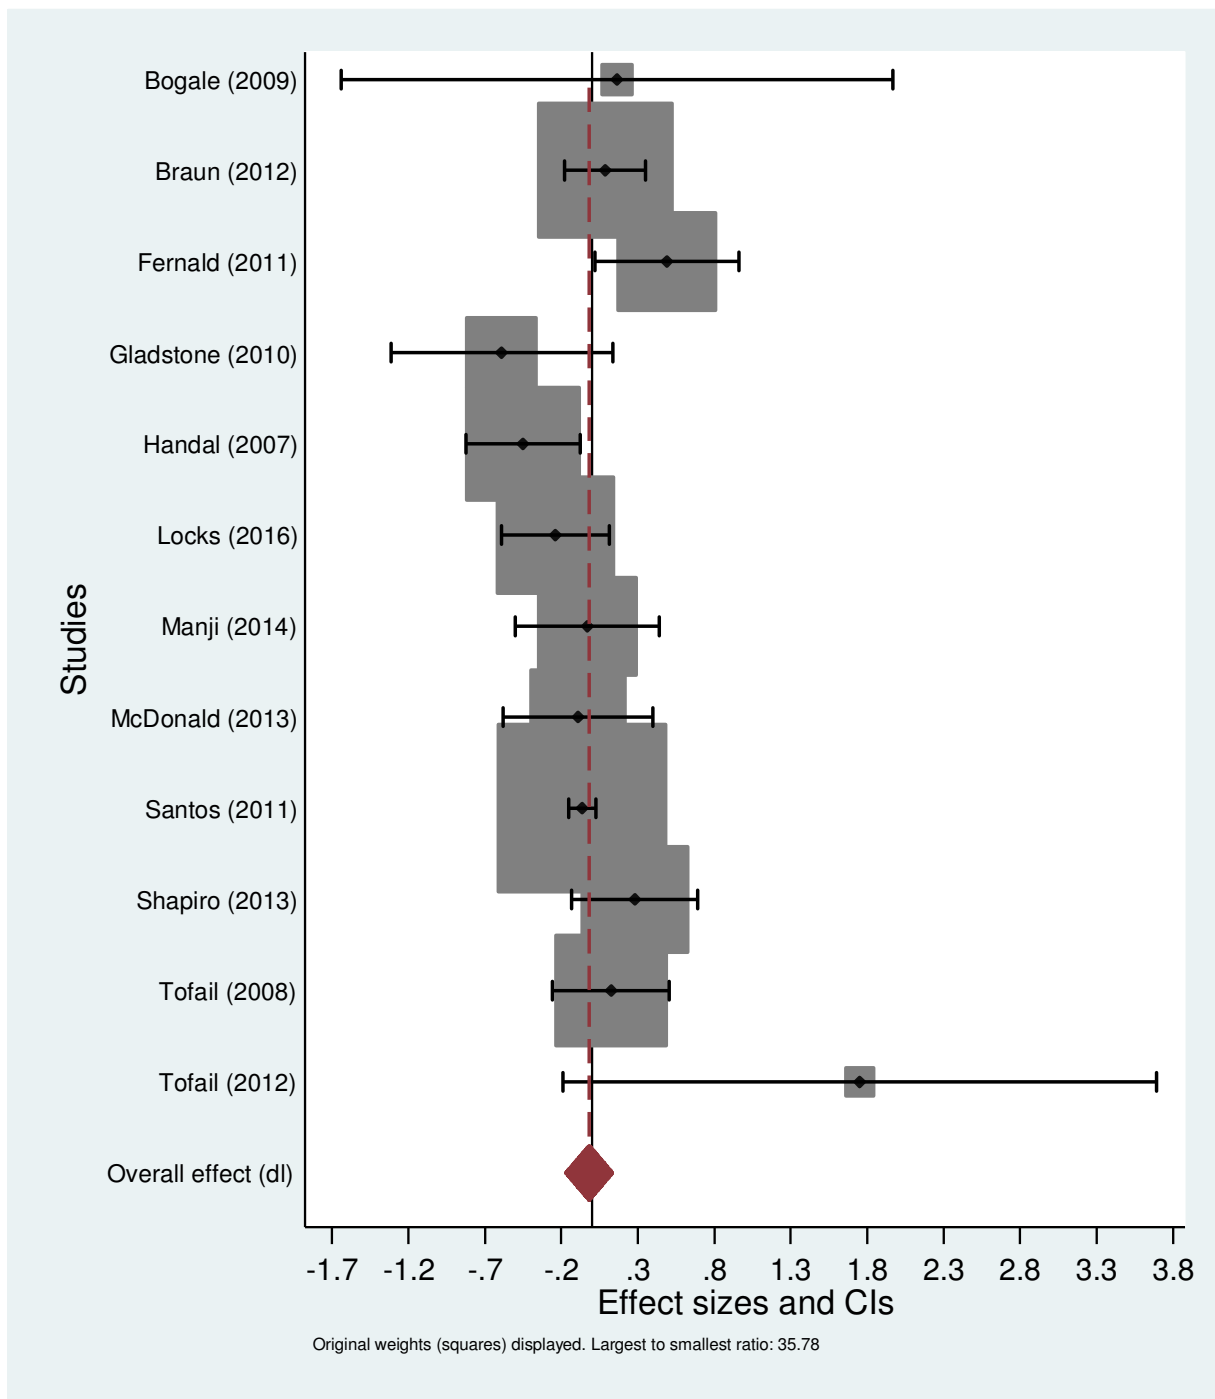

Figure 54: Association between maternal BMI >30 kg/m<sup>2</sup> (reference: 18.5-25) and cognitive development.

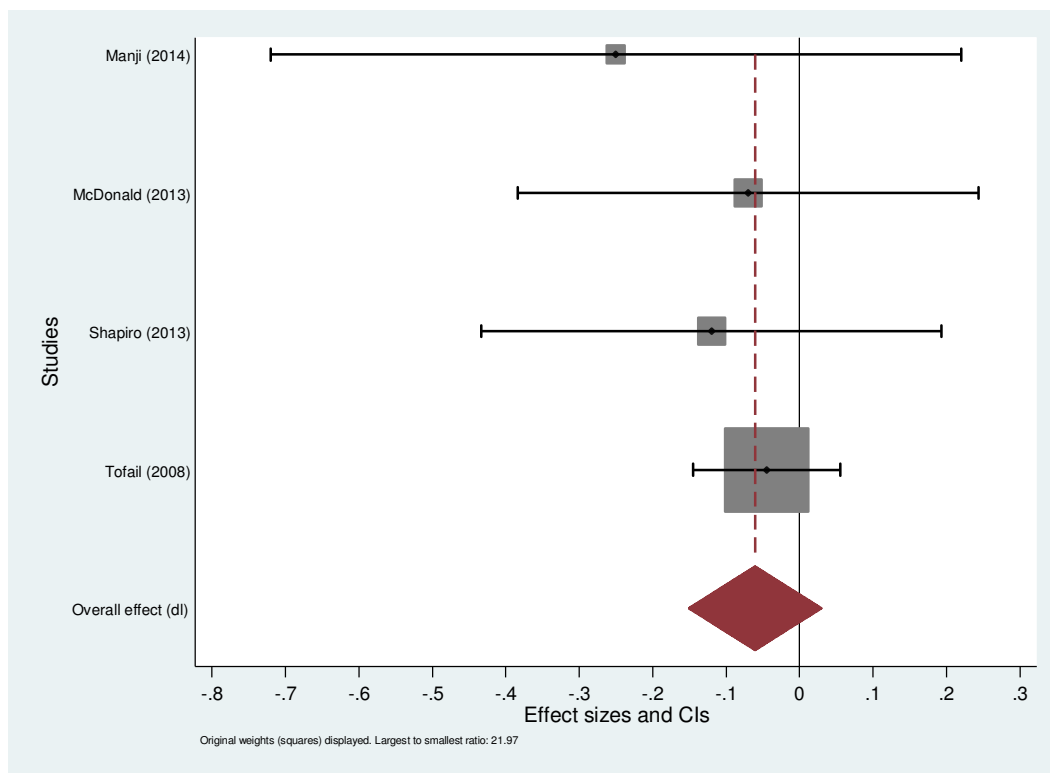

Figure 55: Association between mild anemia in pregnancy (reference: no anemia) and cognitive development.



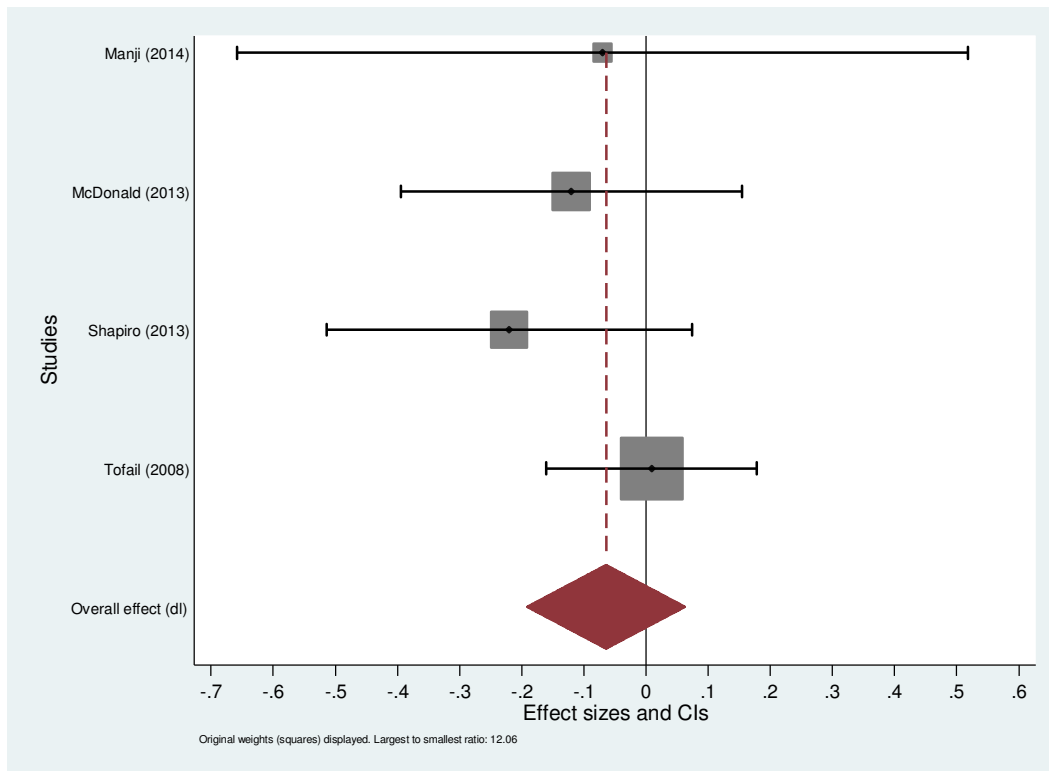

Figure 56: Association between maternal moderate anemia (reference: no anemia) and cognitive development.

5. Parental Risk Factors on Child's Motor Development

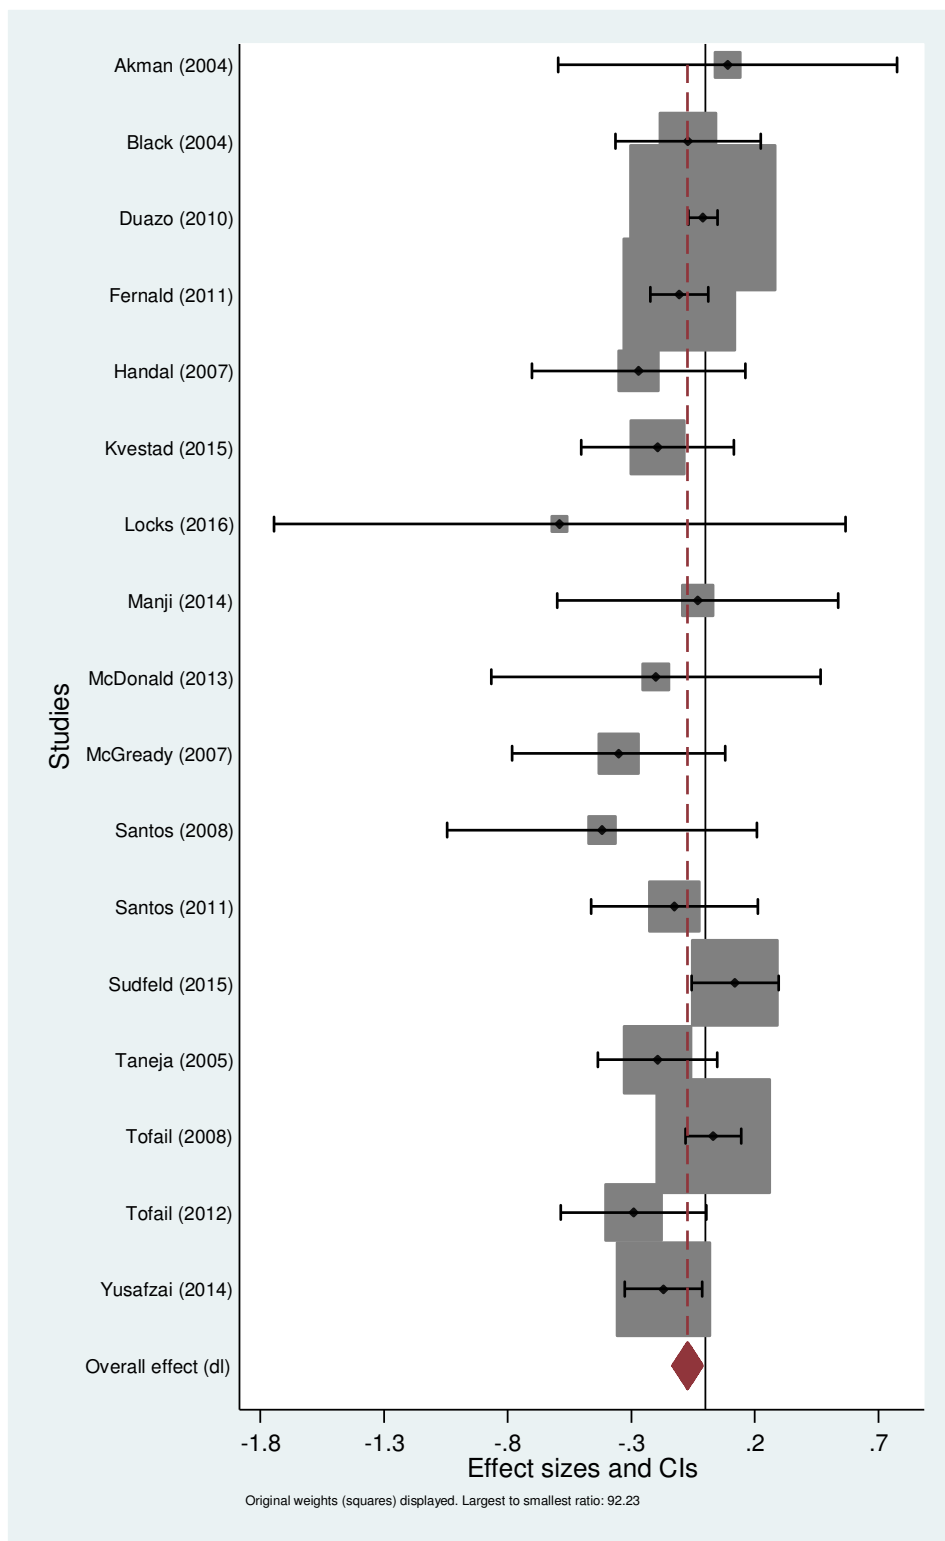

Figure 57: Association between no maternal education (reference: primary education) and motor development.

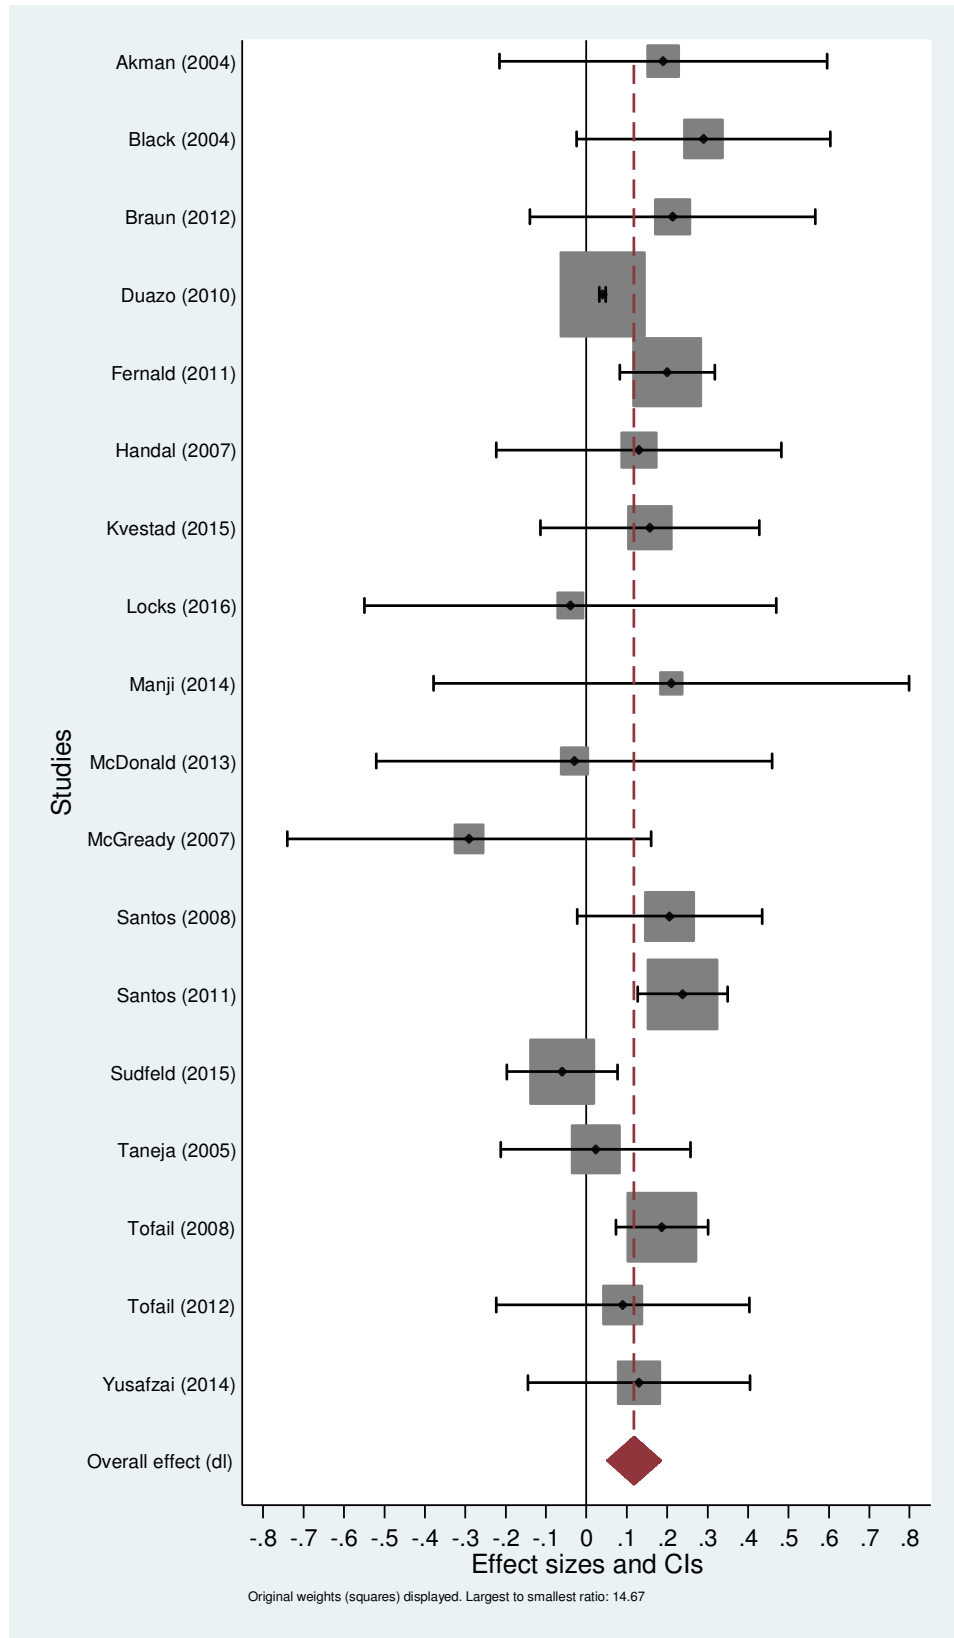

Figure 58: Association between maternal secondary education (reference: primary education) and motor development.

1  
2  
3  
4  
5  
6  
7  
8  
9  
10  
11  
12  
13  
14  
15  
16  
17  
18  
19  
20  
21  
22  
23  
24  
25  
26  
27  
28  
29  
30  
31  
32  
33  
34  
35  
36  
37  
38  
39  
40  
41  
42  
43  
44  
45  
46  
47  
48  
49  
50  
51  
52  
53  
54  
55  
56  
57  
58  
59  
60

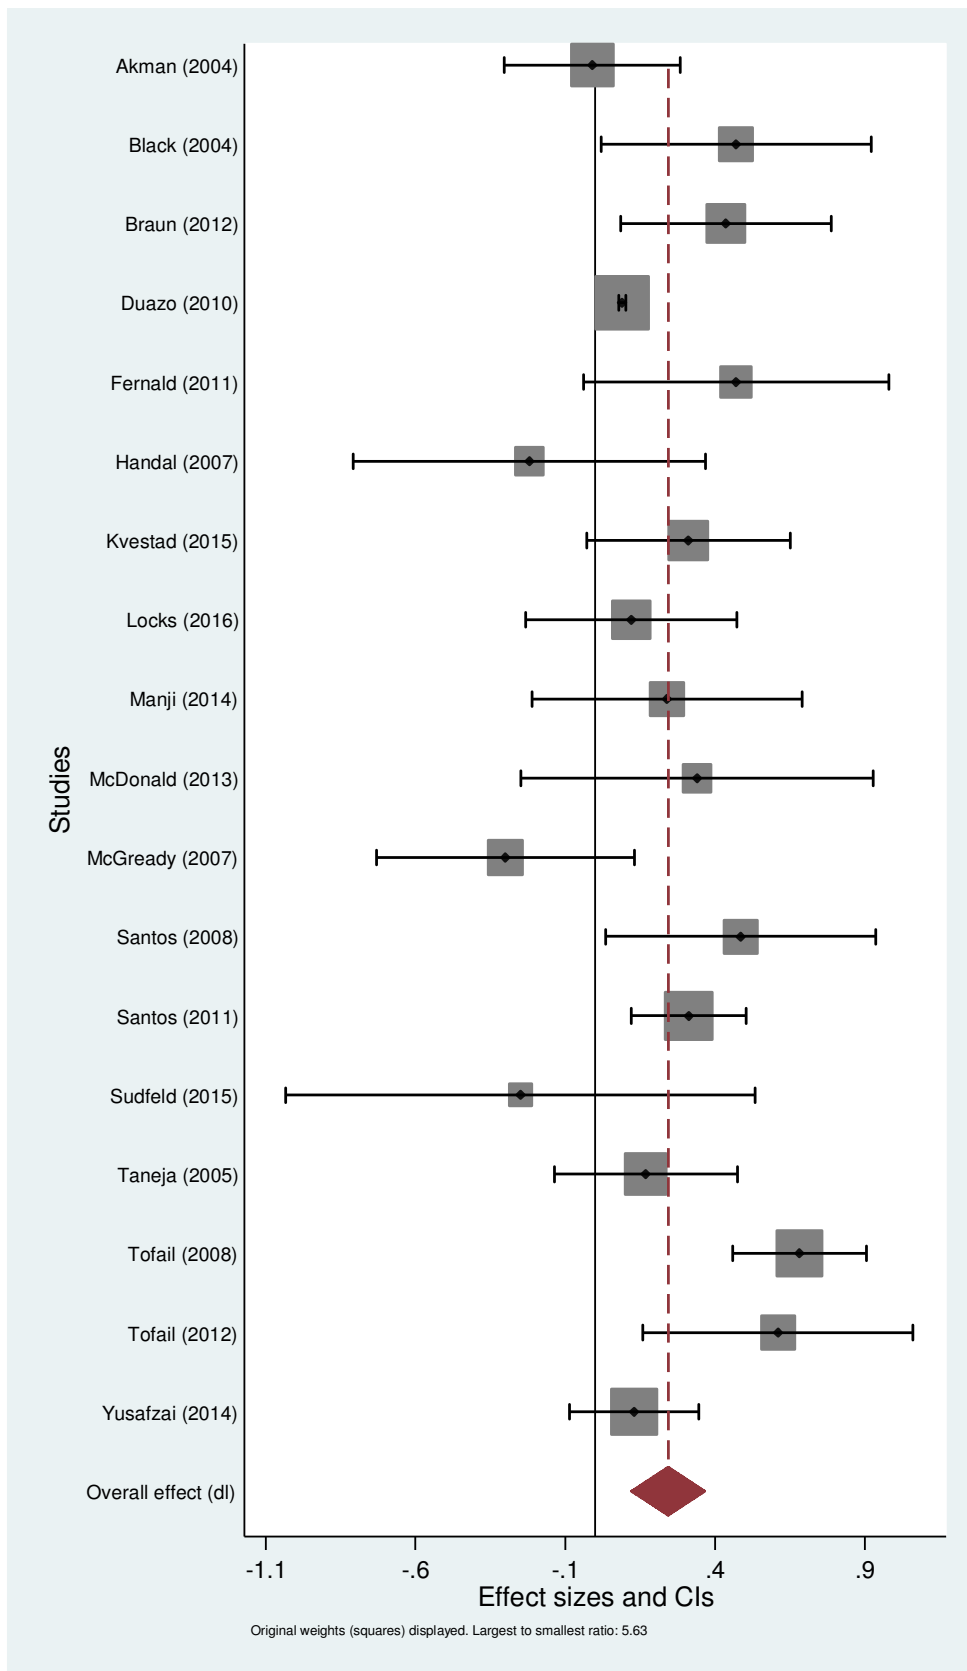

Figure 59: Association between maternal higher education (reference: primary education) and motor development.

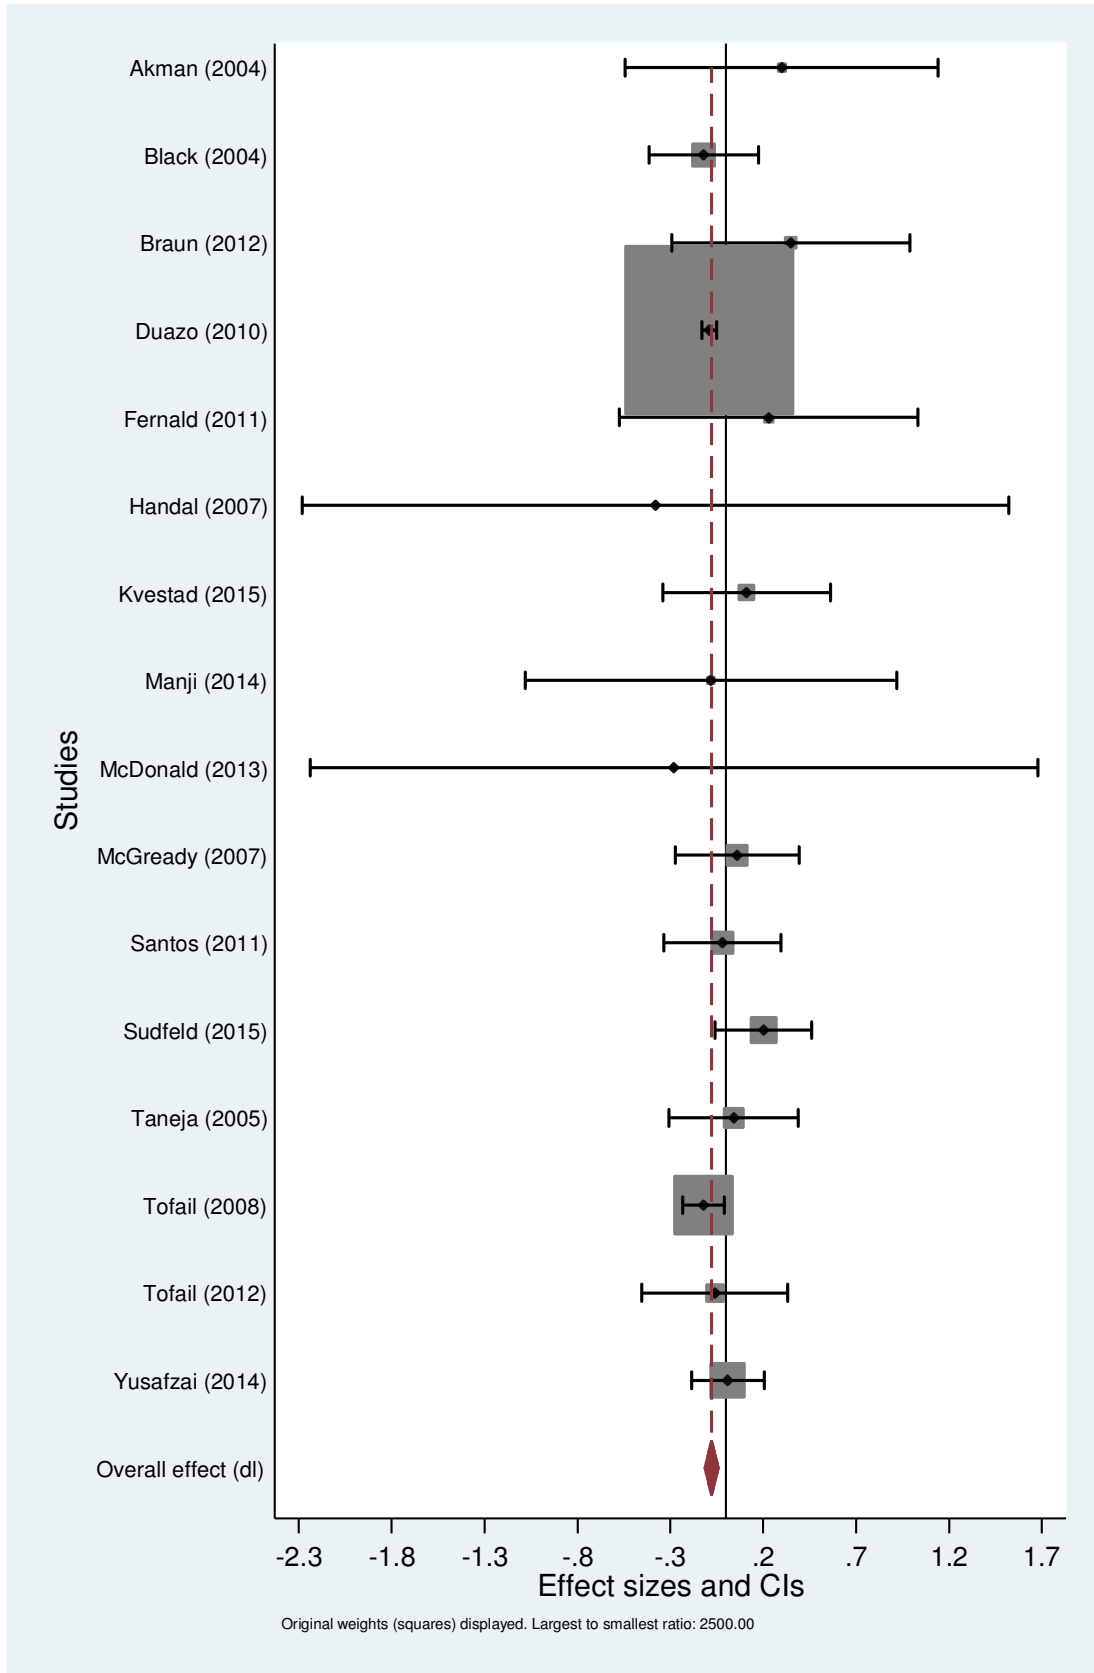

Figure 60: Association between no paternal education (reference: primary education) and motor development.

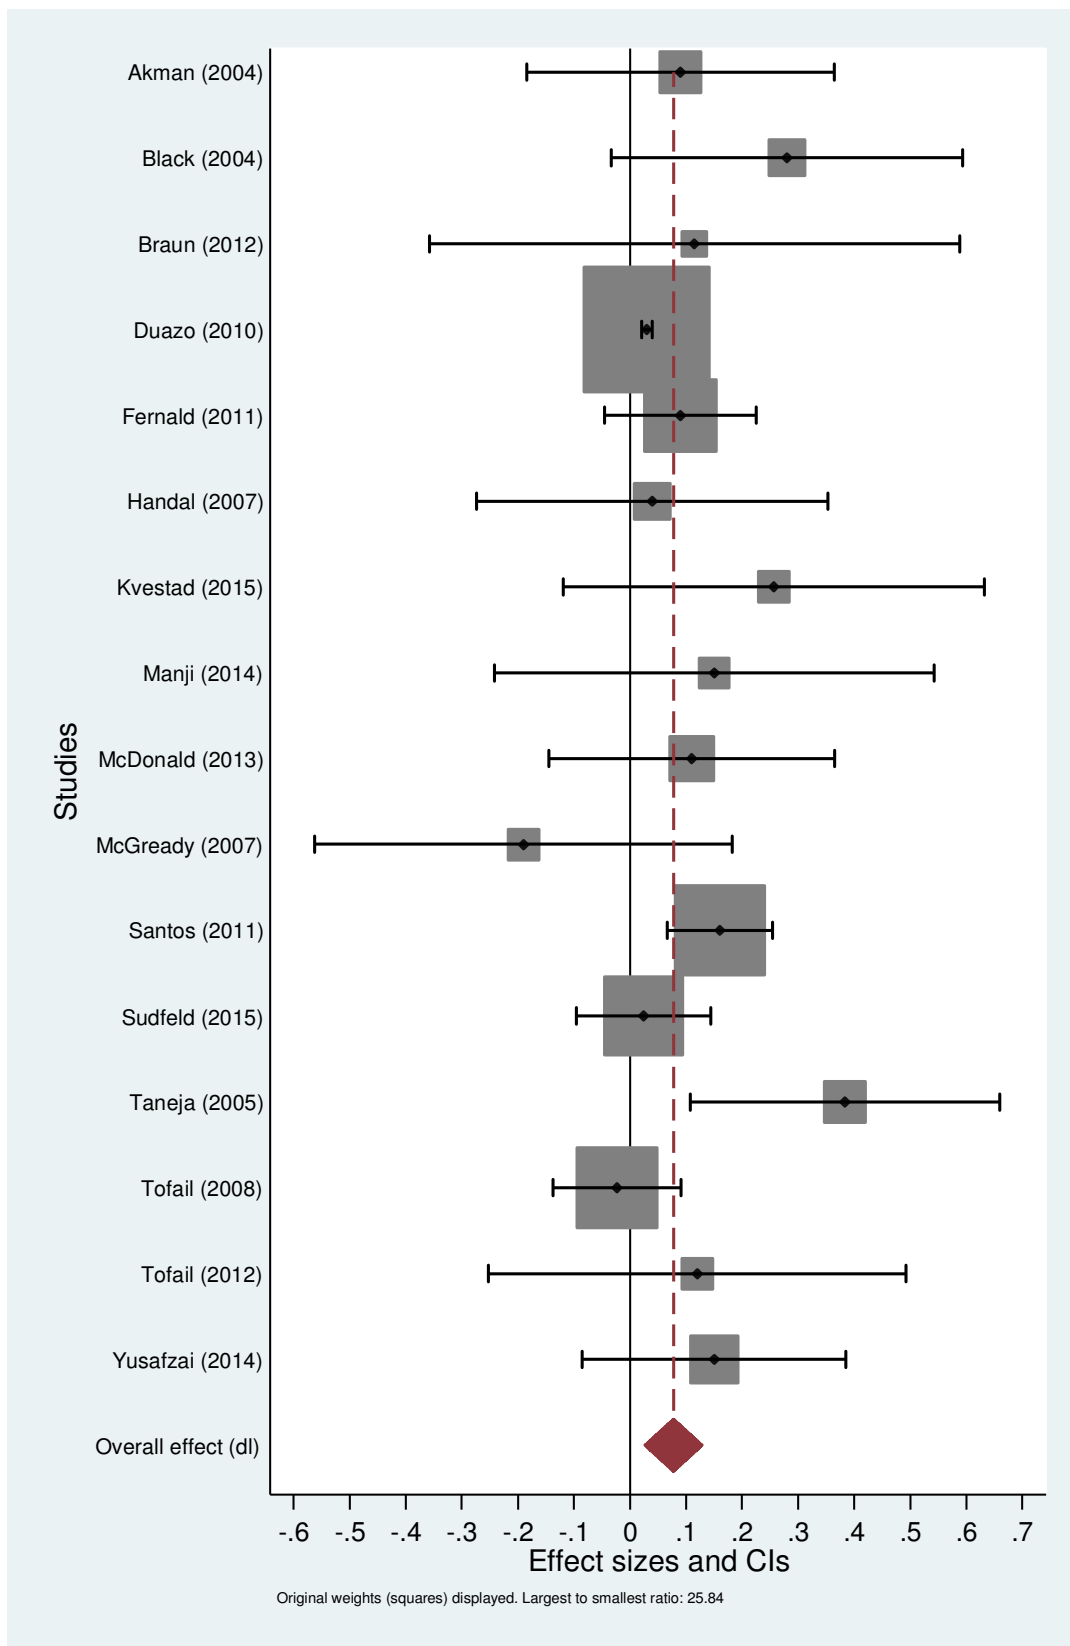

Figure 61: Association between paternal secondary education (reference: primary education) and motor development.

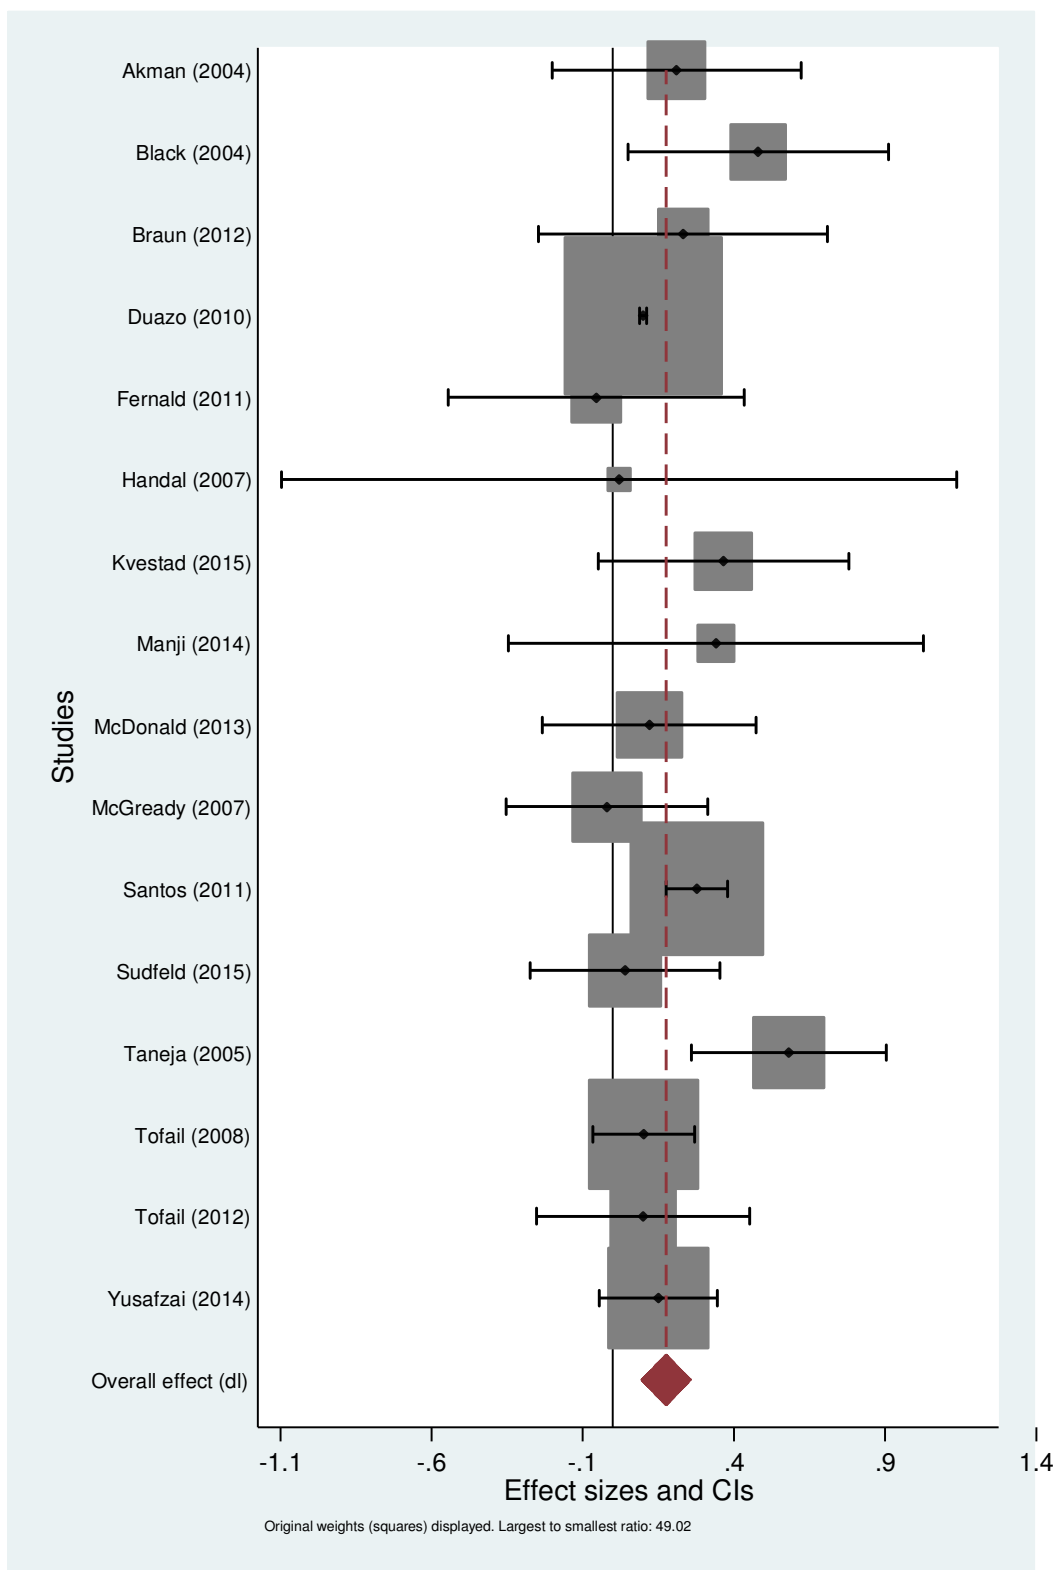

Figure 62: Association between paternal higher education (reference: primary education) and motor development.

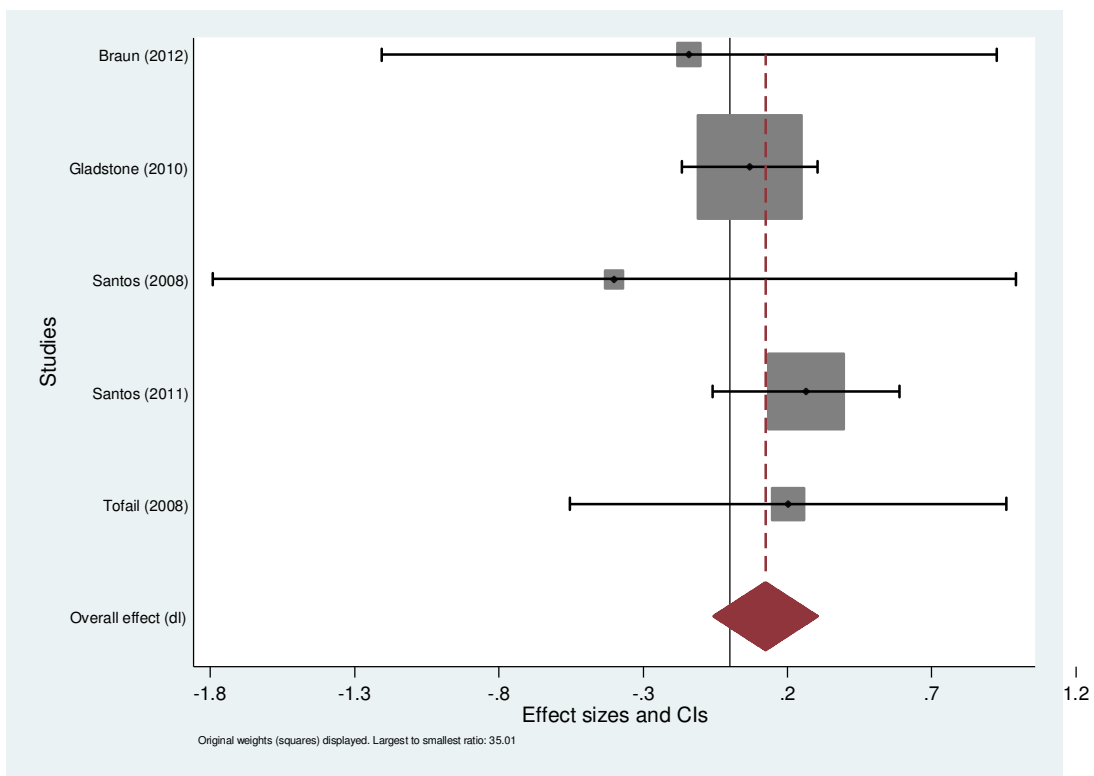

**Figure 63: Association between maternal ages < 15 (reference: ages 20-34) and motor development.**



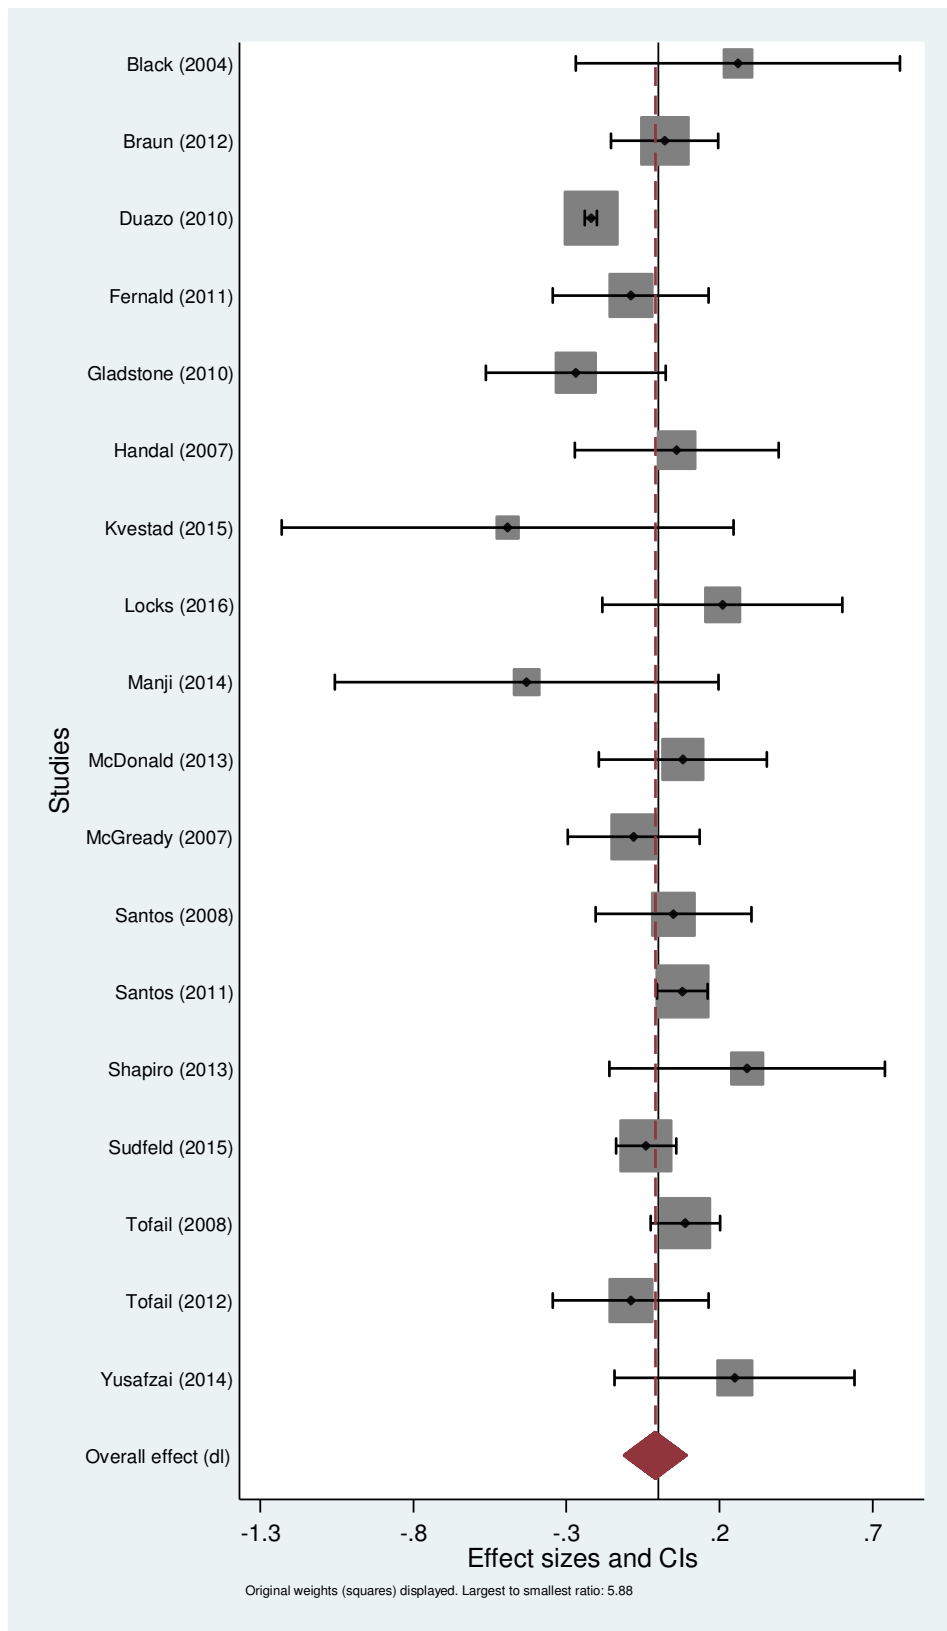

Figure 64: Association between maternal ages 15-20 (reference: ages 20-34) and motor development.

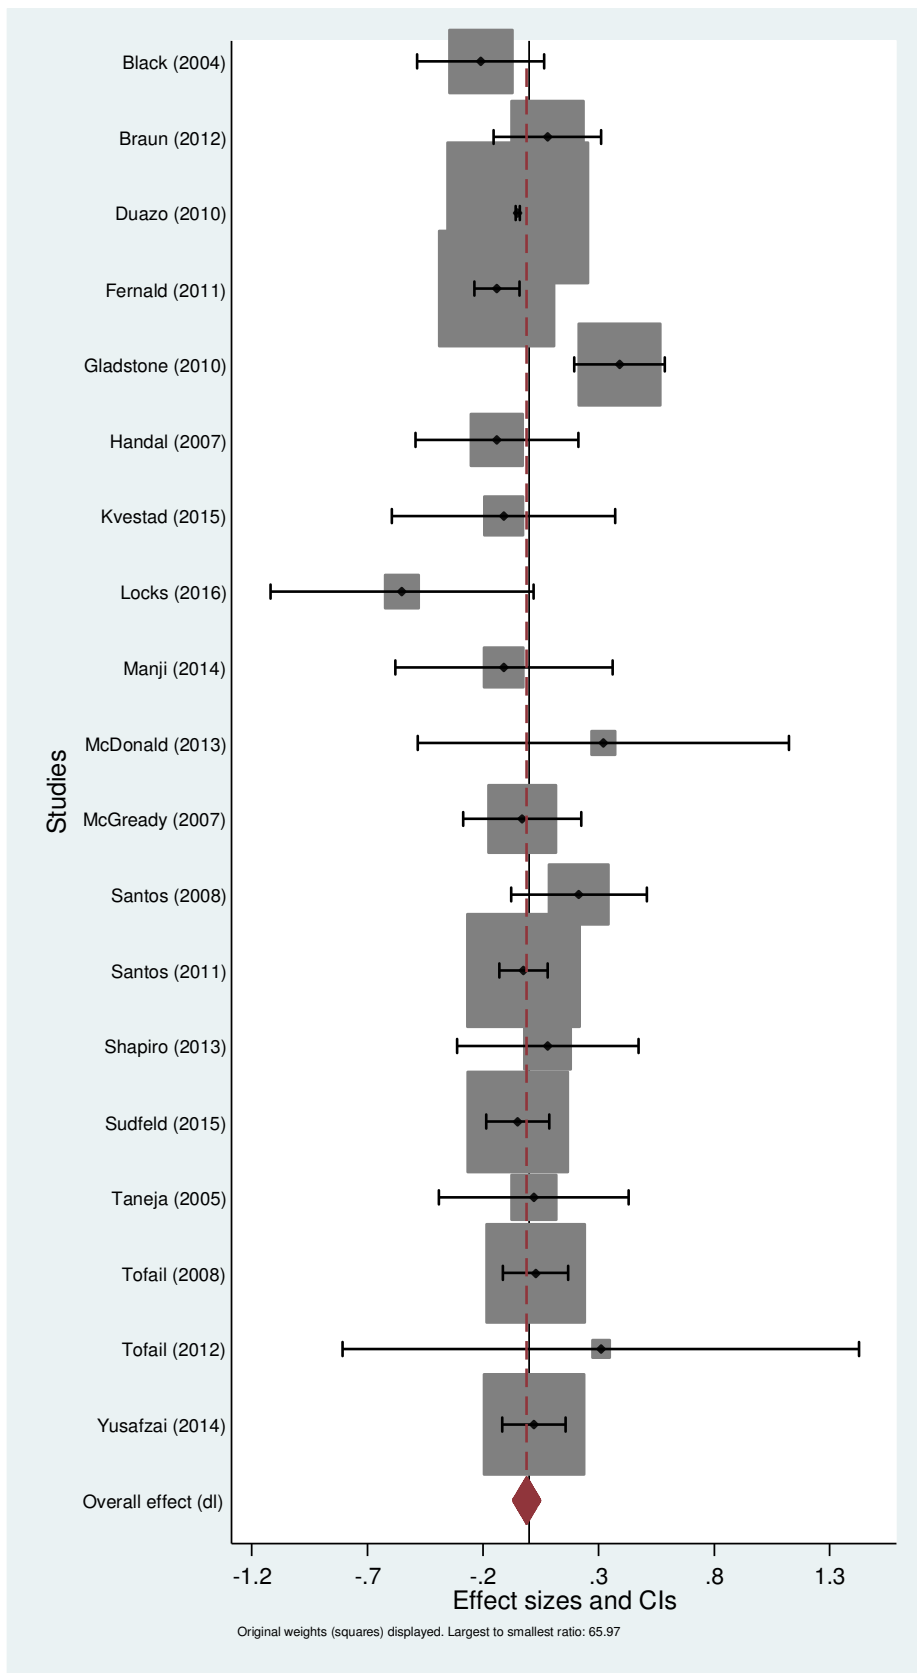

Figure 65: Association between maternal ages >35 (reference: ages 20-34) and motor development.

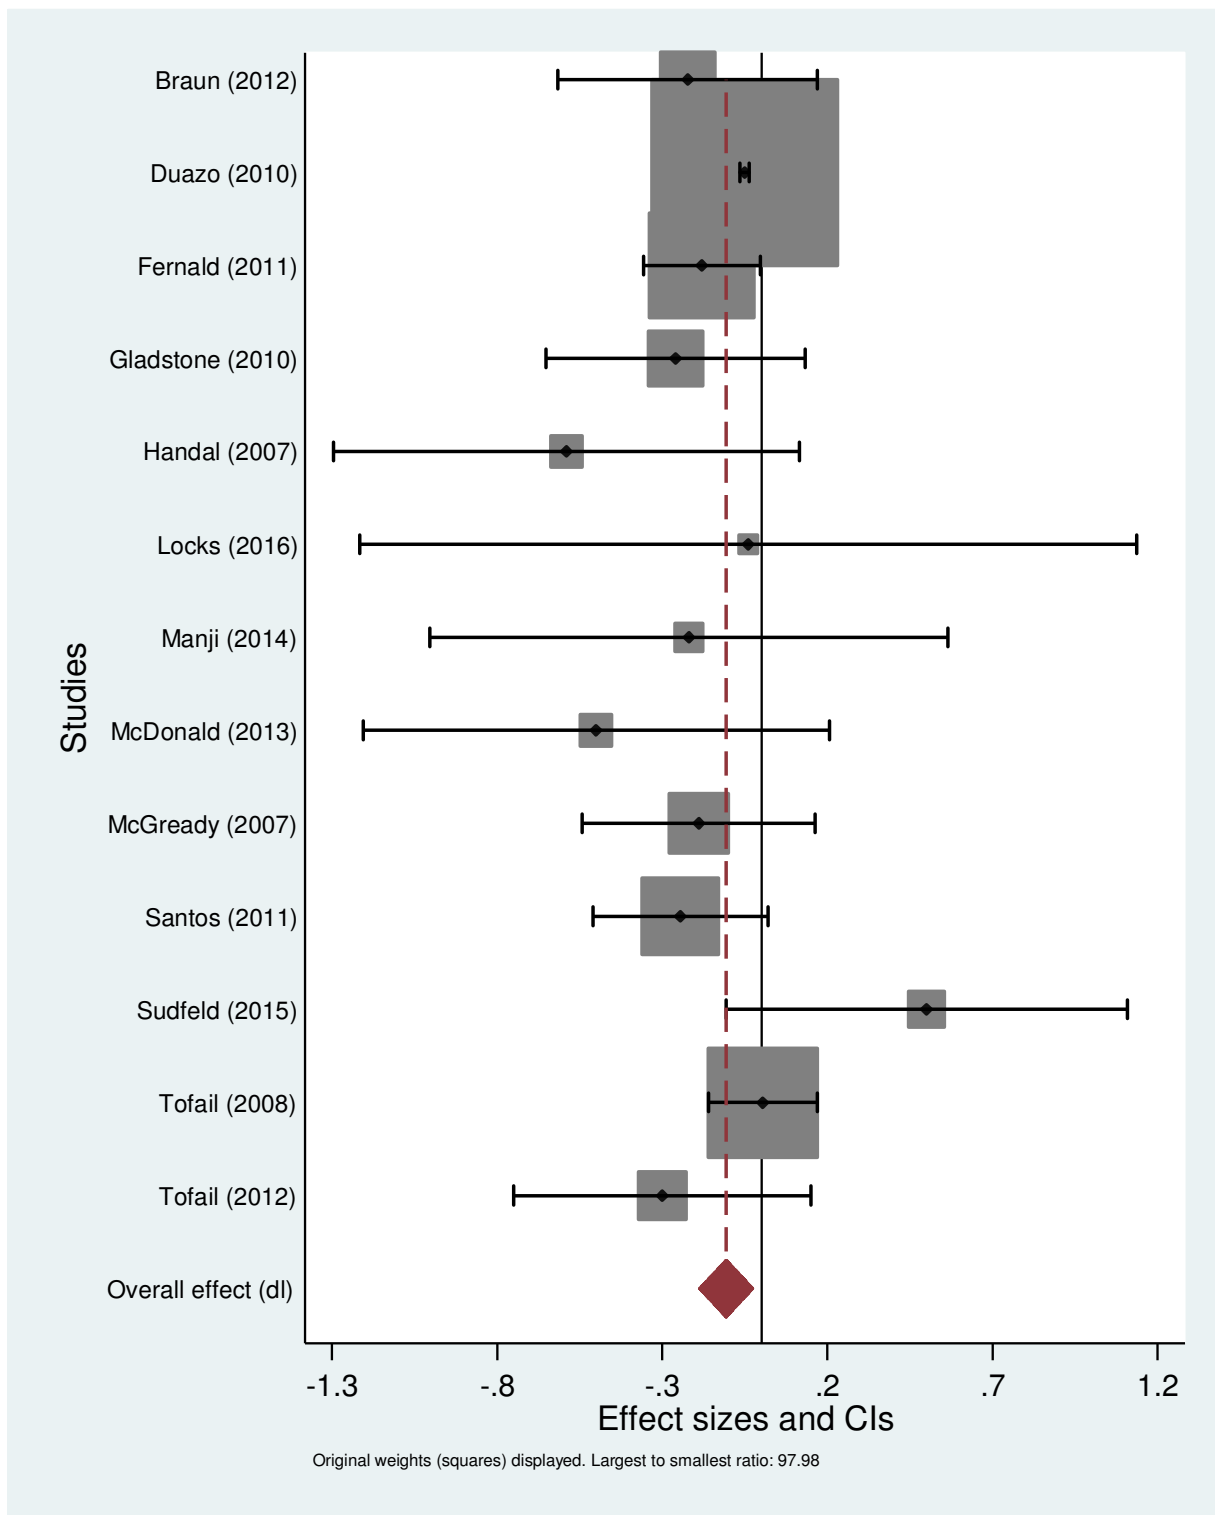

Figure 66: Association between maternal height <145 (reference: >155 cm) and motor development.

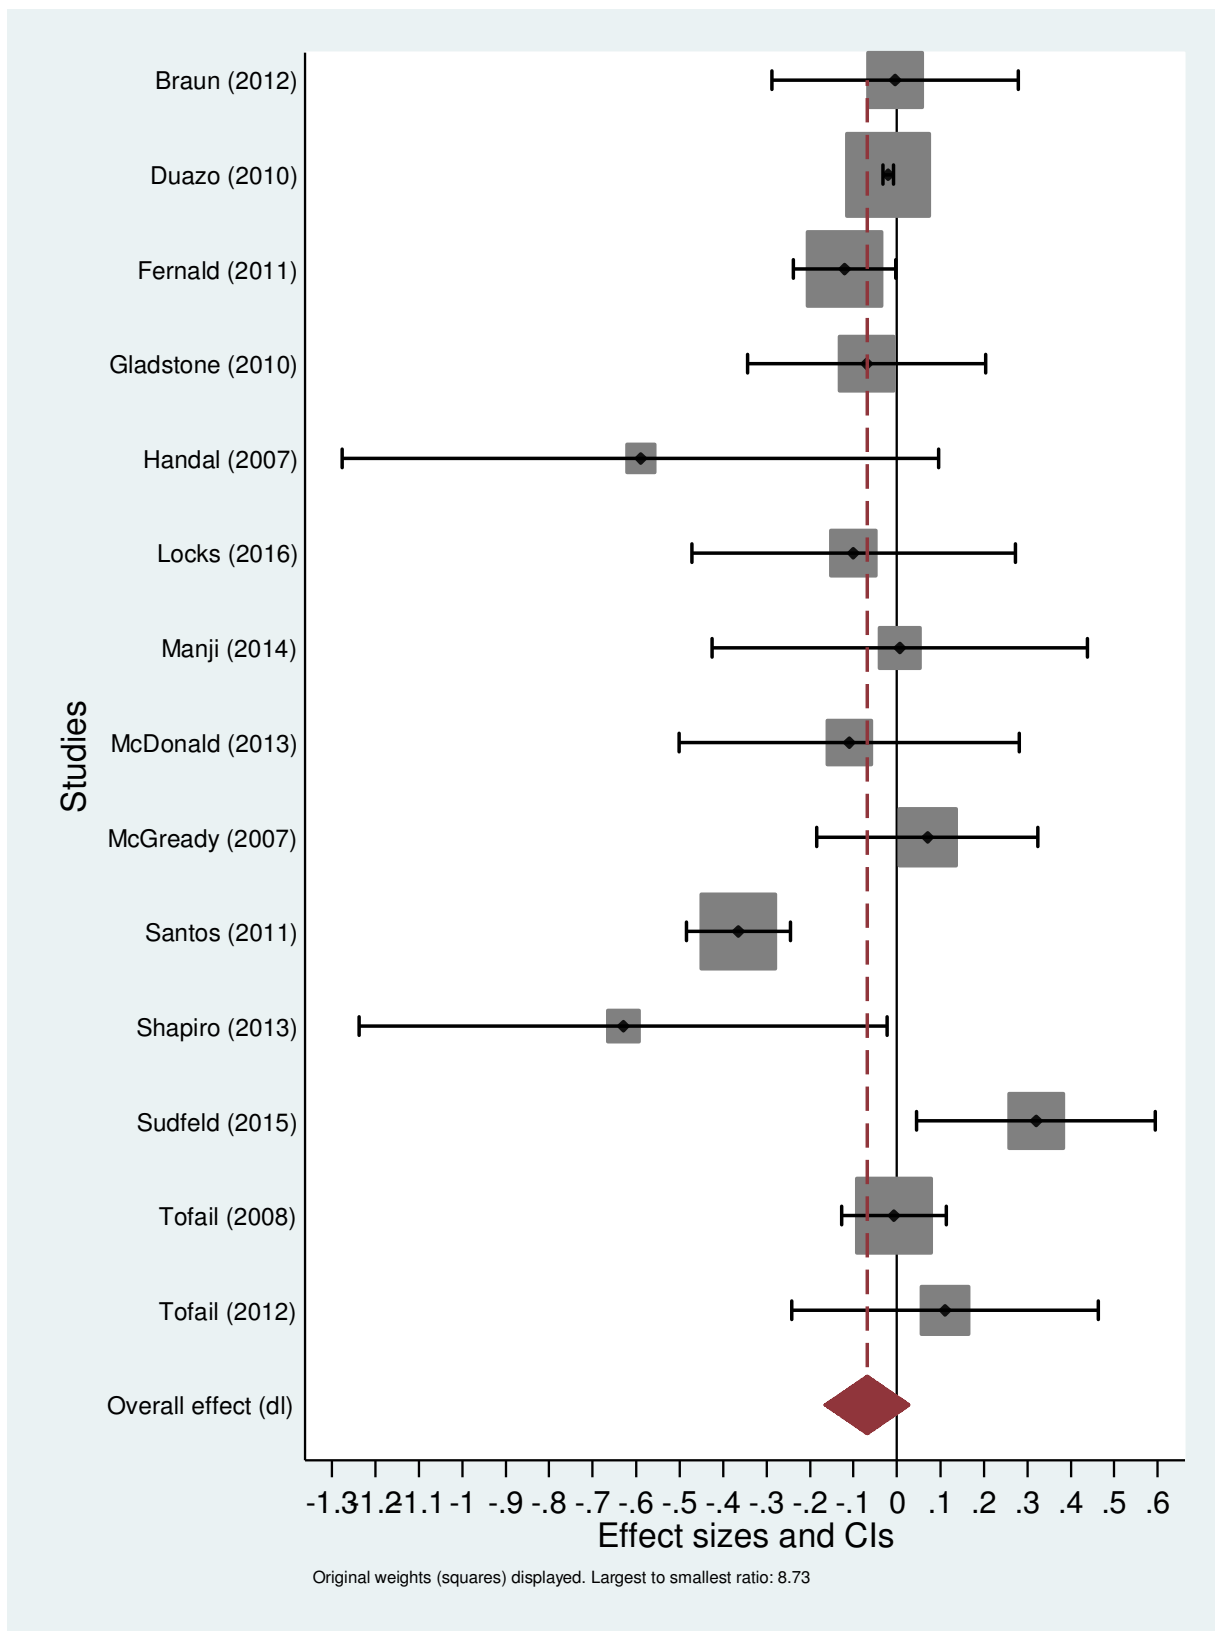

Figure 67: Association between maternal height 145-150 (reference: >155 cm) and motor development.

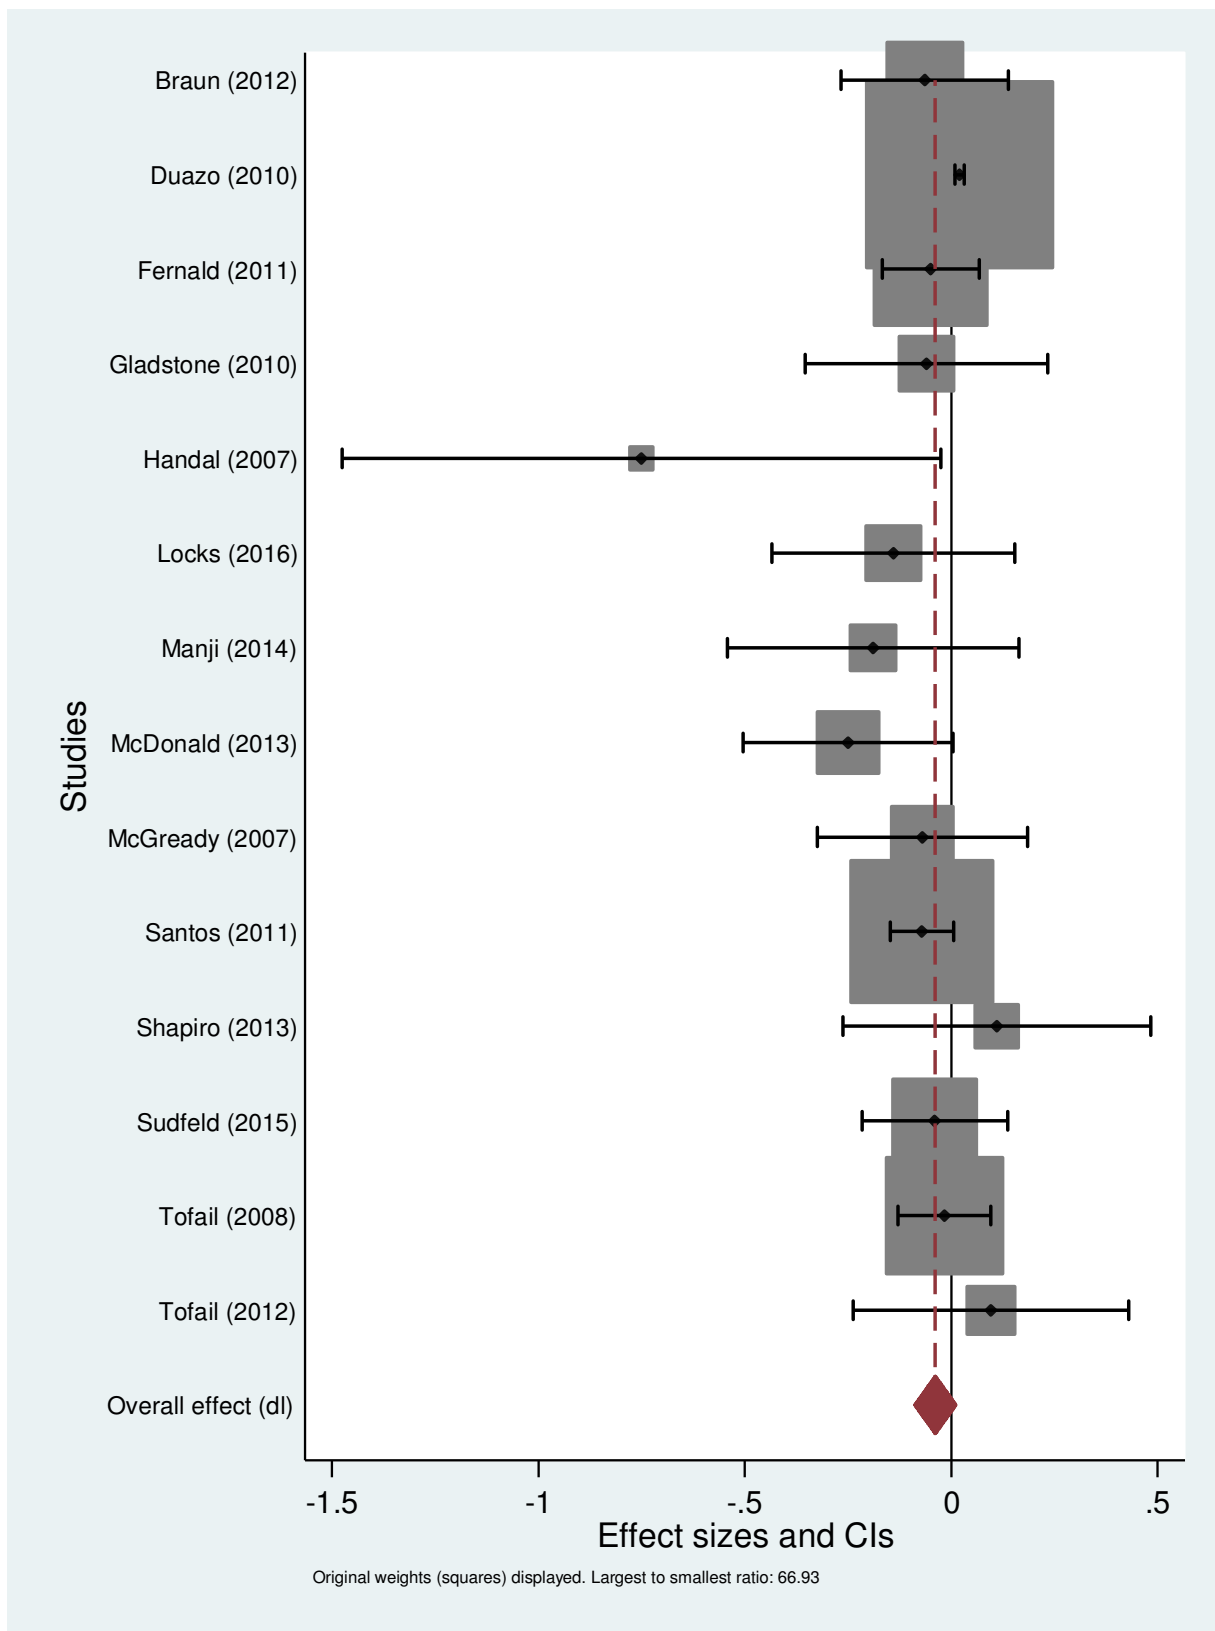

Figure 68: Association between maternal height 150-155 (reference: >155 cm) and motor development.

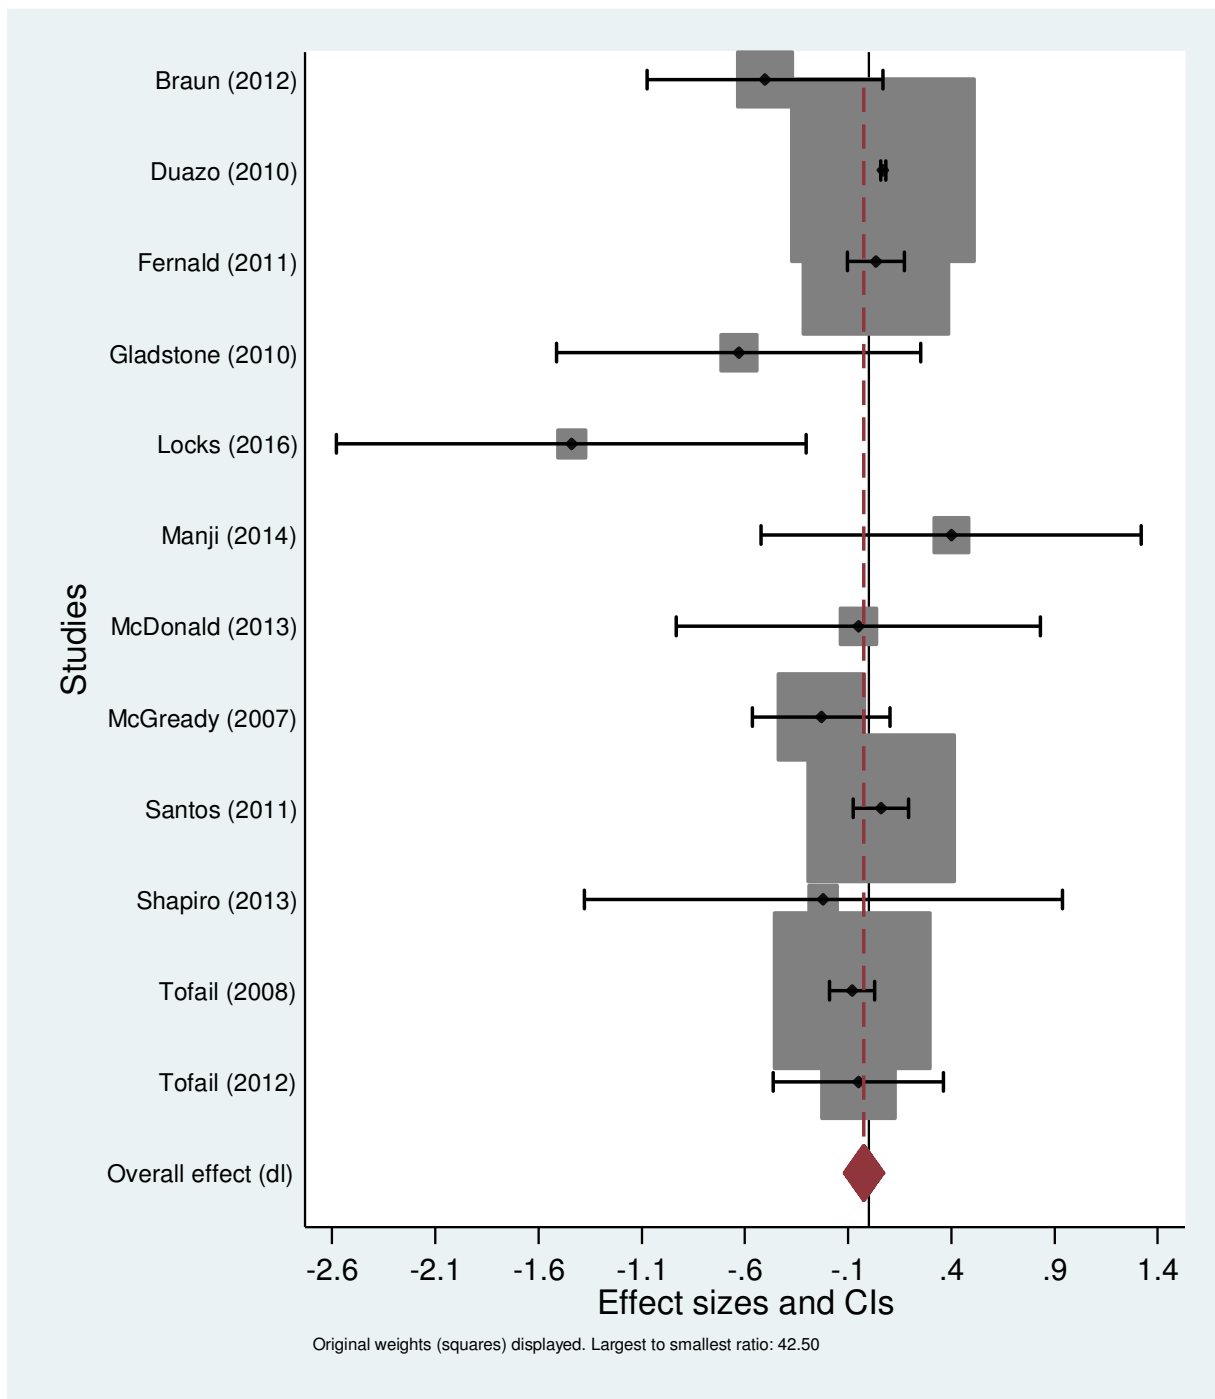

Figure 69: Association between maternal BMI <18.5 kg/m<sup>2</sup> (reference: 18.5-25) and motor development.

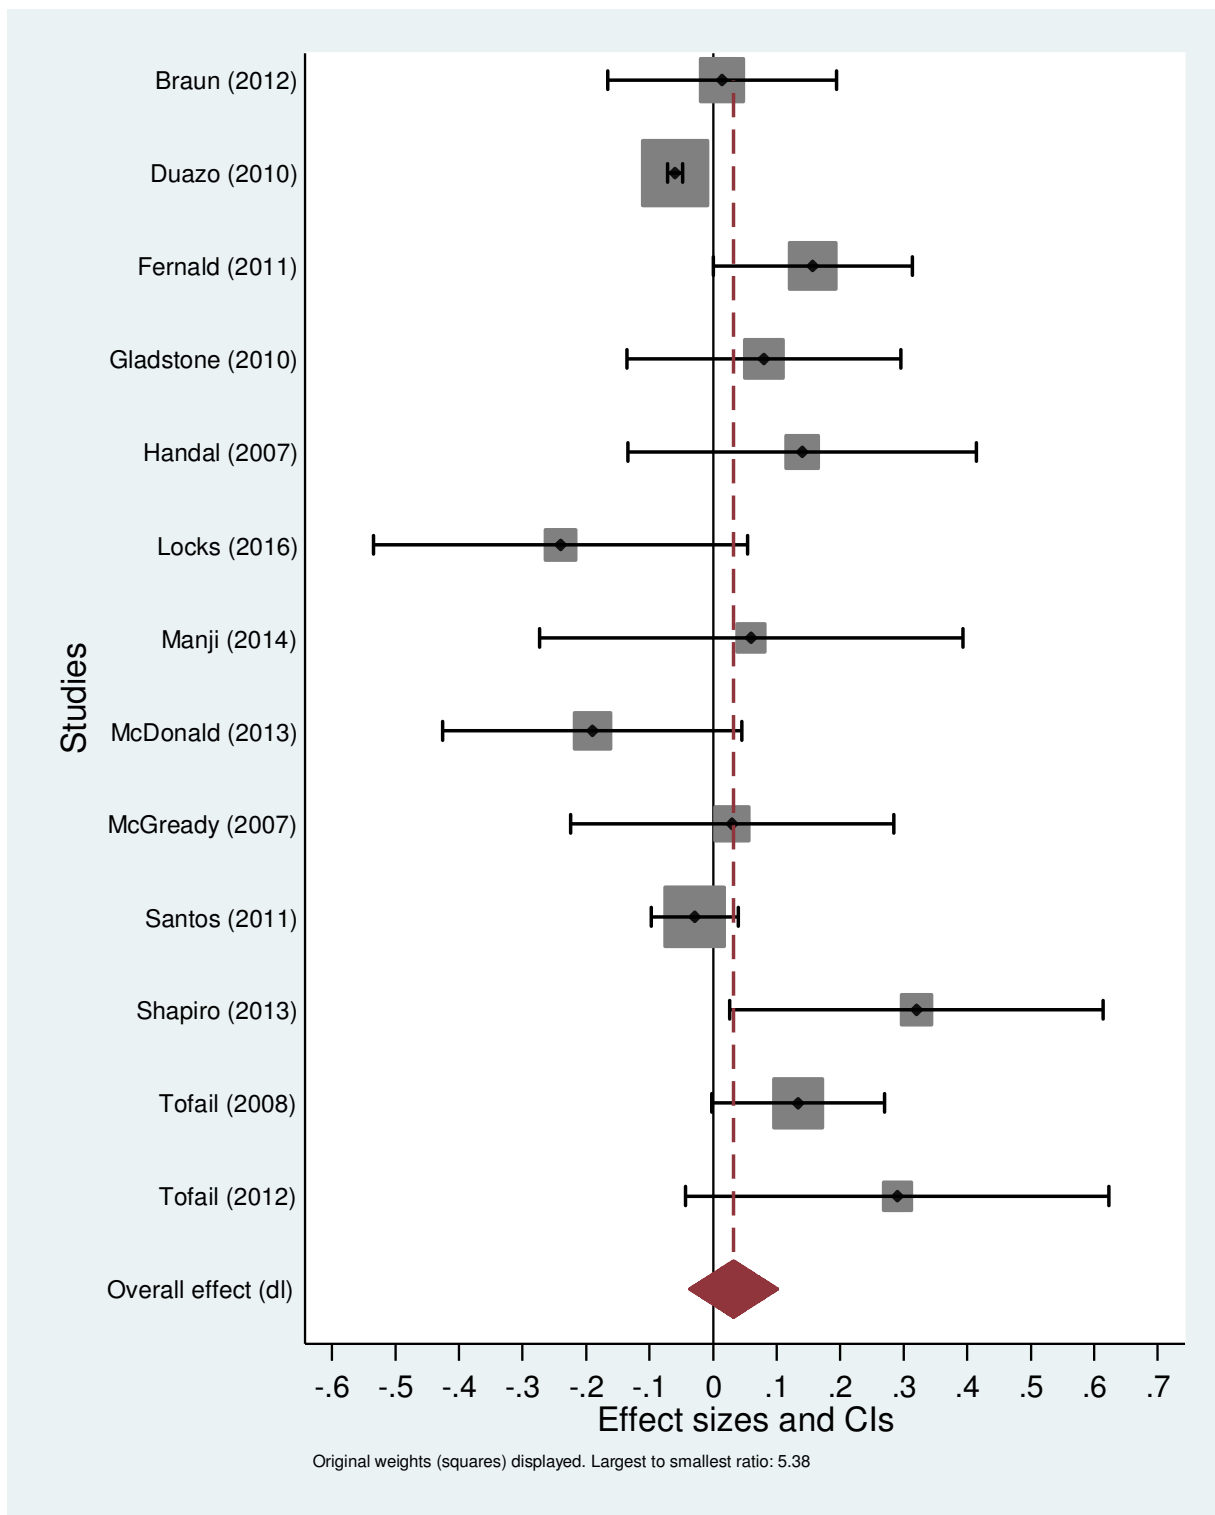

Figure 70: Association between maternal BMI <25-30 kg/m<sup>2</sup> (reference: 18.5-25) and motor development.

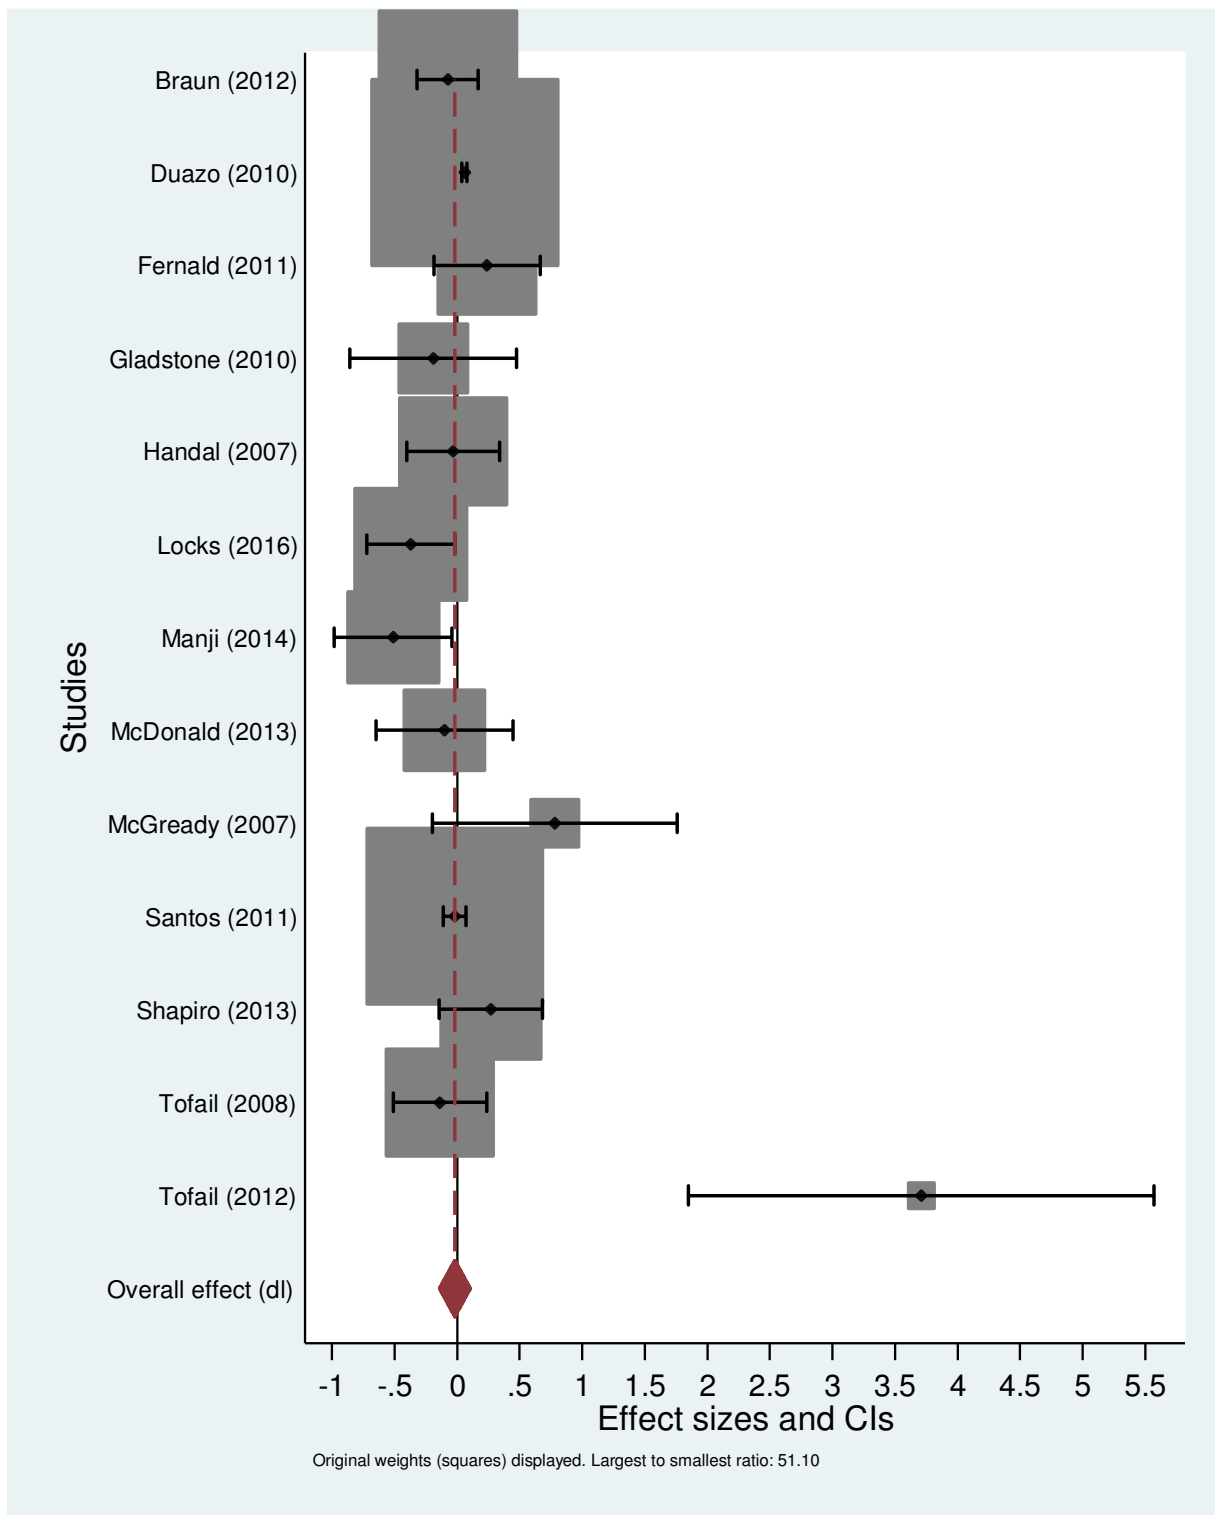

Figure 71: Association between maternal BMI >30 kg/m<sup>2</sup> (reference: 18.5-25) and motor development.



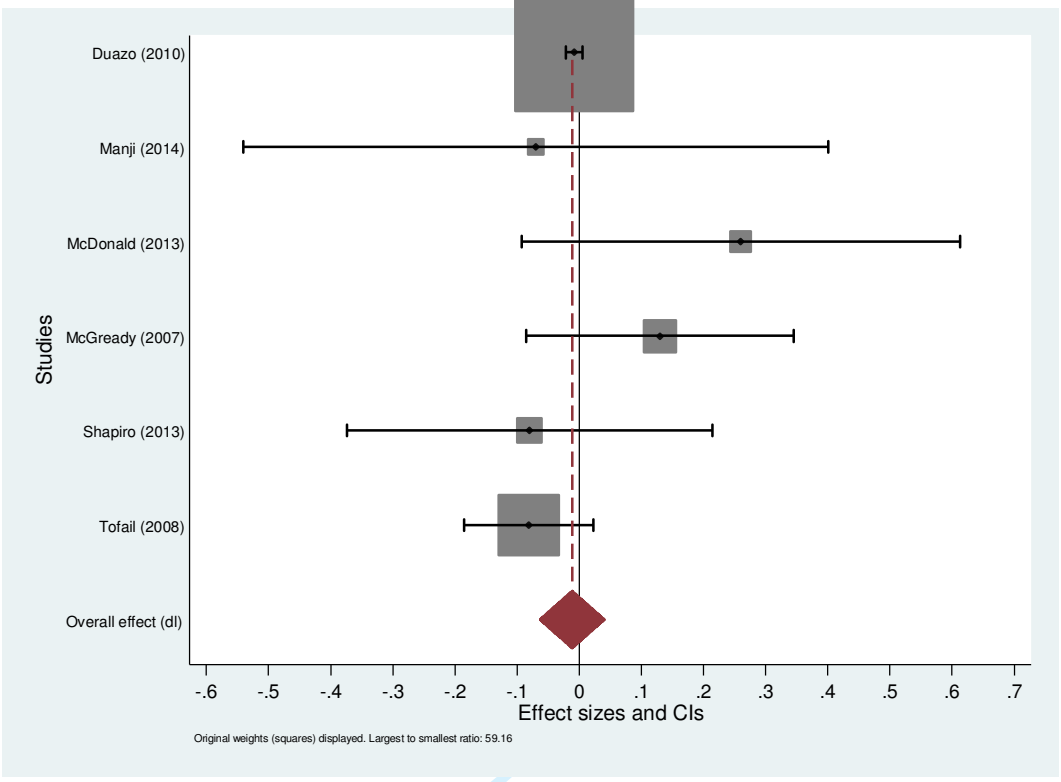

**Figure 72: Association between maternal mild anemia (reference: no anemia) and motor development.**

review only

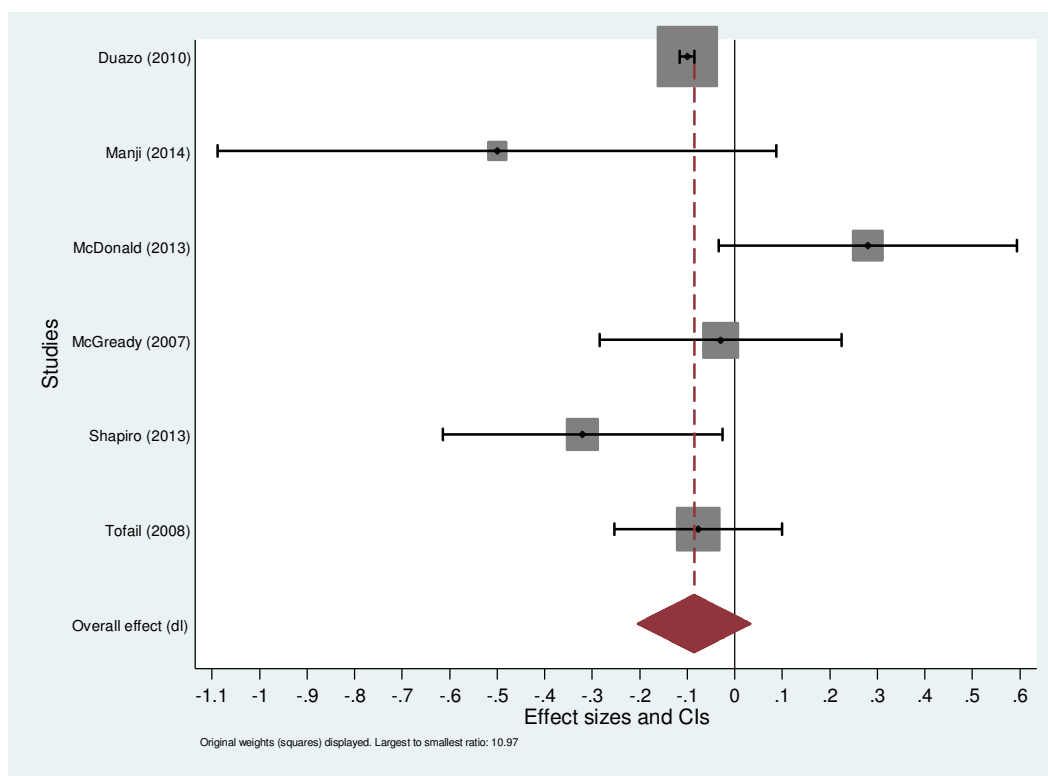

**Figure 73: Association between maternal moderate anemia (reference: no anemia) and motor development.**

## 6. Parental Risk Factors on Child's Language Development

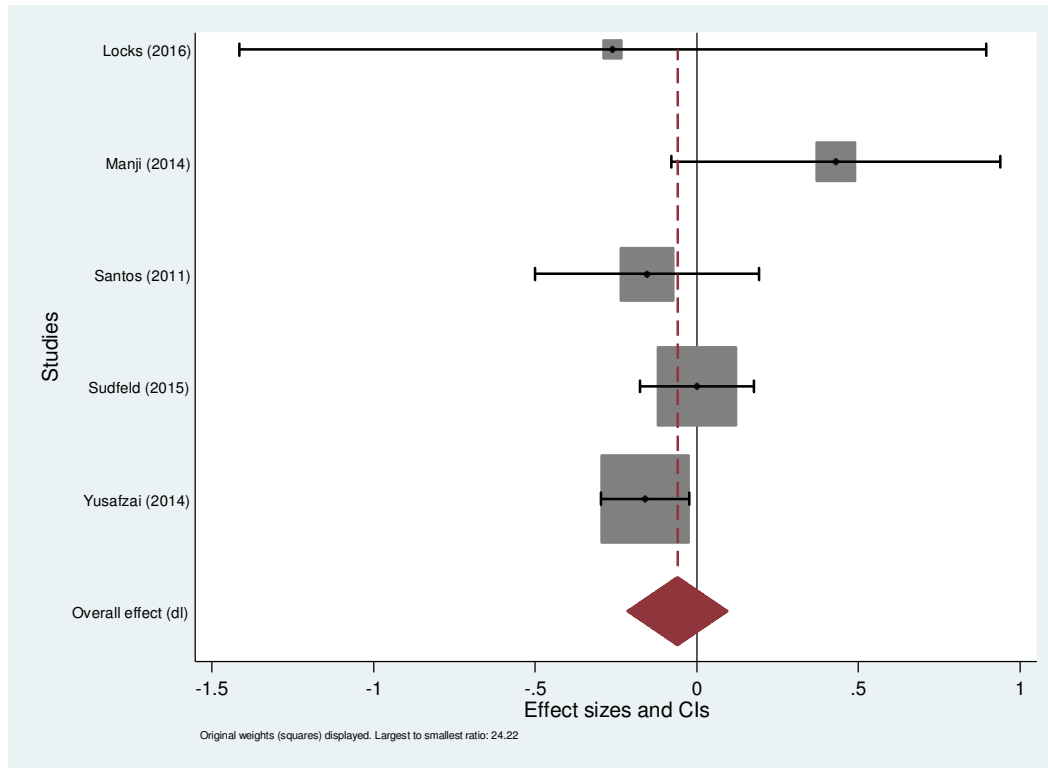

Figure 74: Association between no maternal education (reference: primary education) and language development.

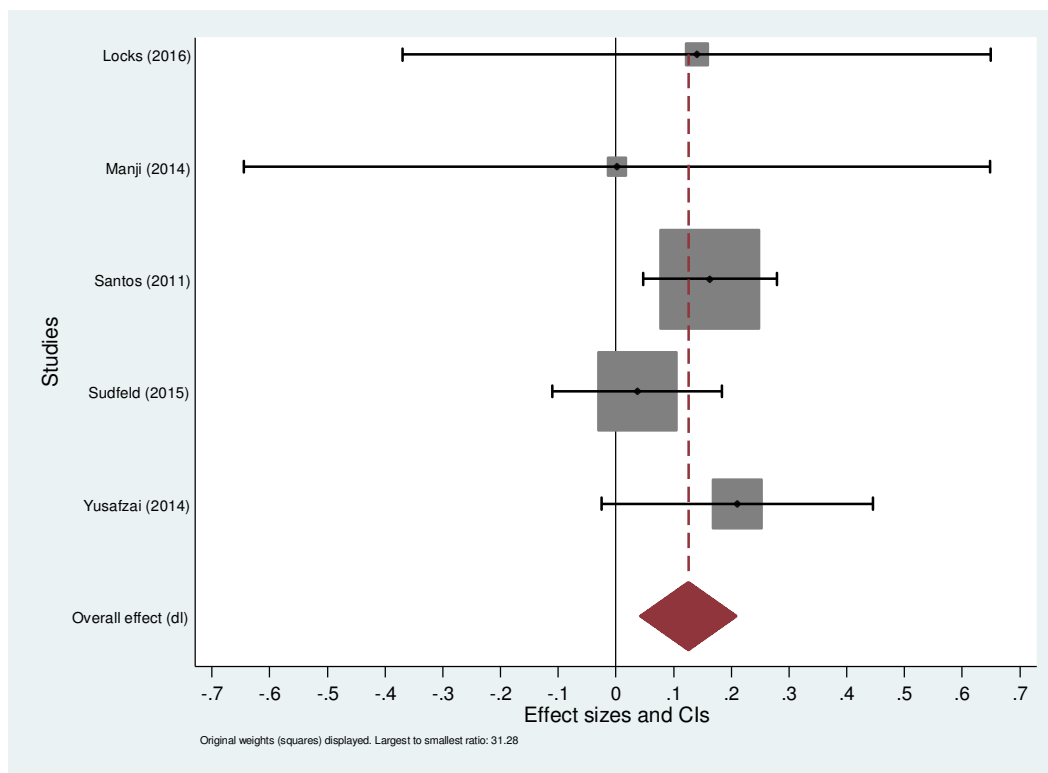

Figure 75: Association between maternal secondary education (reference: primary education) and language development.

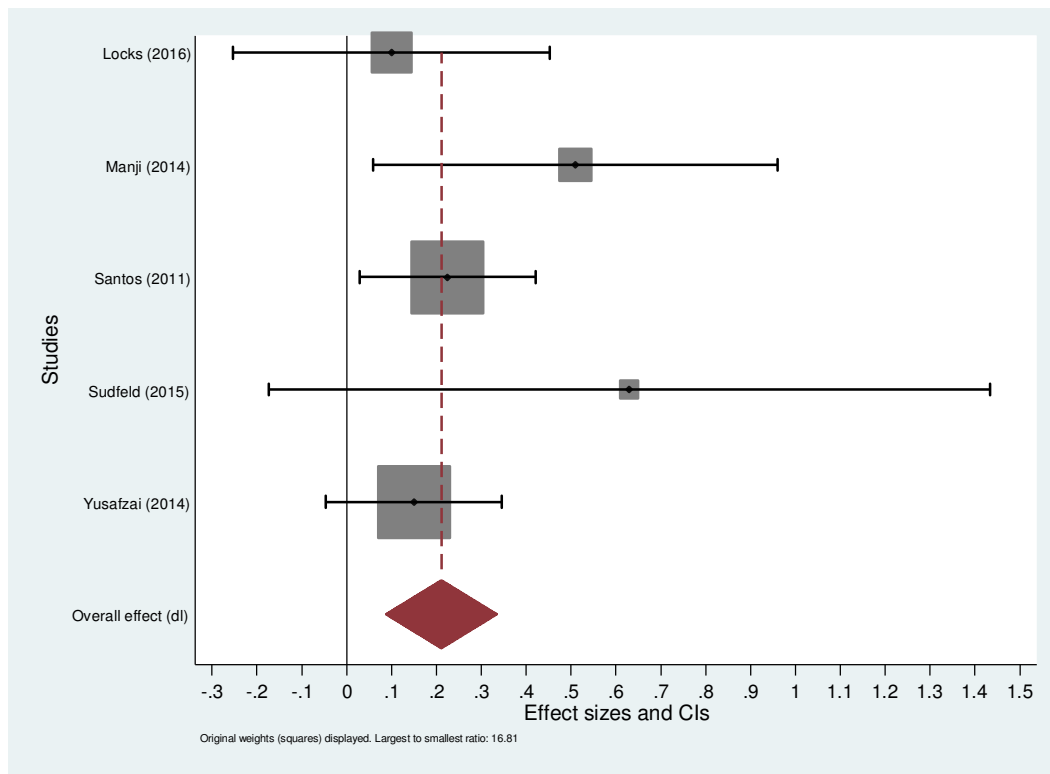

Figure 76: Association between maternal higher education (reference: primary education) and language development.

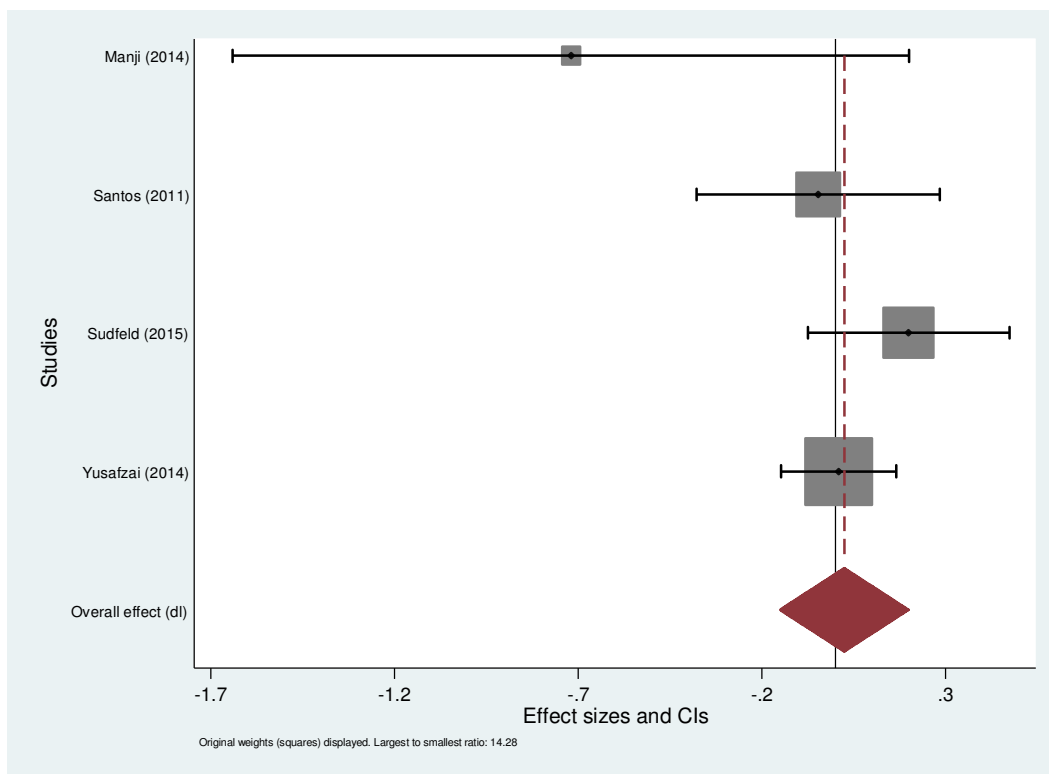

Figure 77: Association between no paternal education (reference: primary education) and language development.

Review only

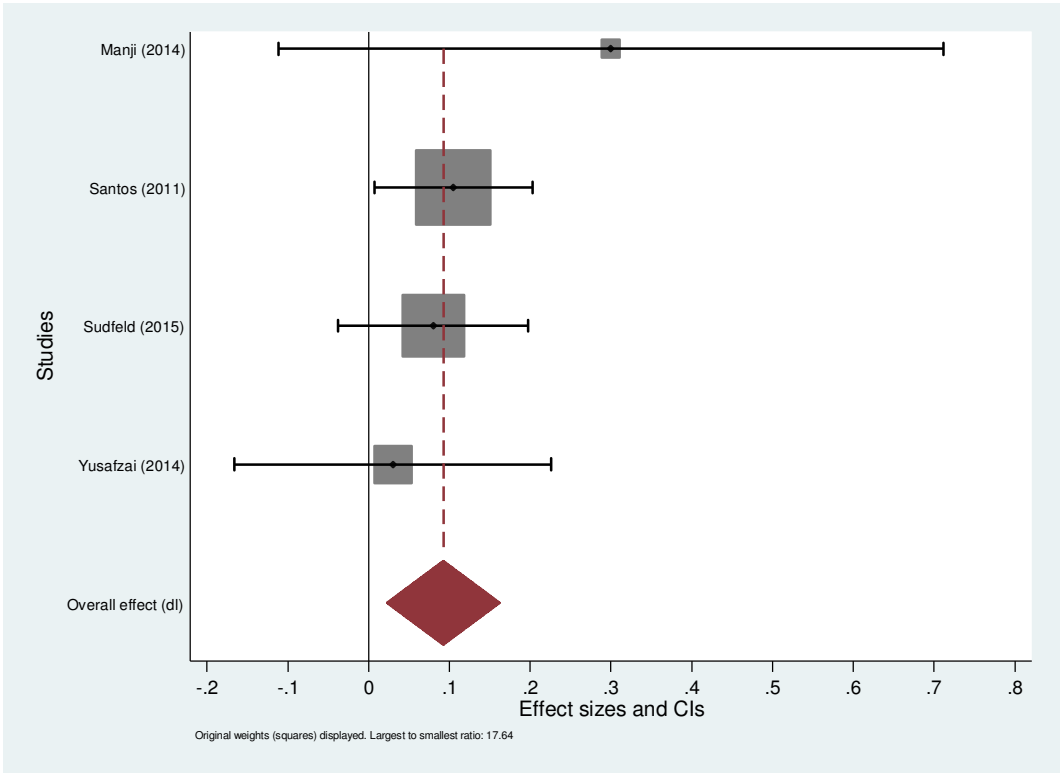

Figure 78: Association between paternal secondary education (reference: primary education) and language development.

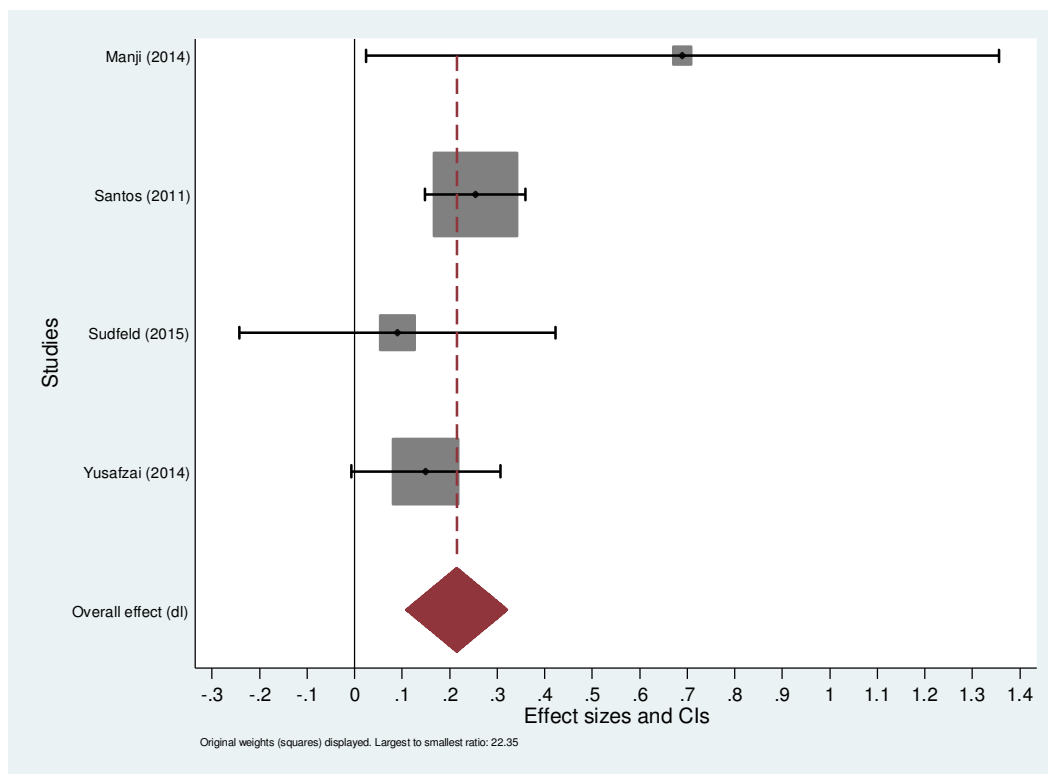

Figure 79: Association between paternal higher education (reference: primary education) and language development.



1  
2  
3  
4  
5  
6  
7  
8  
9  
10  
11  
12  
13  
14  
15  
16  
17  
18  
19  
20  
21  
22  
23  
24  
25  
26  
27  
28  
29  
30  
31  
32  
33  
34  
35  
36  
37  
38  
39  
40  
41  
42  
43  
44  
45  
46  
47  
48  
49  
50  
51  
52  
53  
54  
55  
56  
57  
58  
59  
60

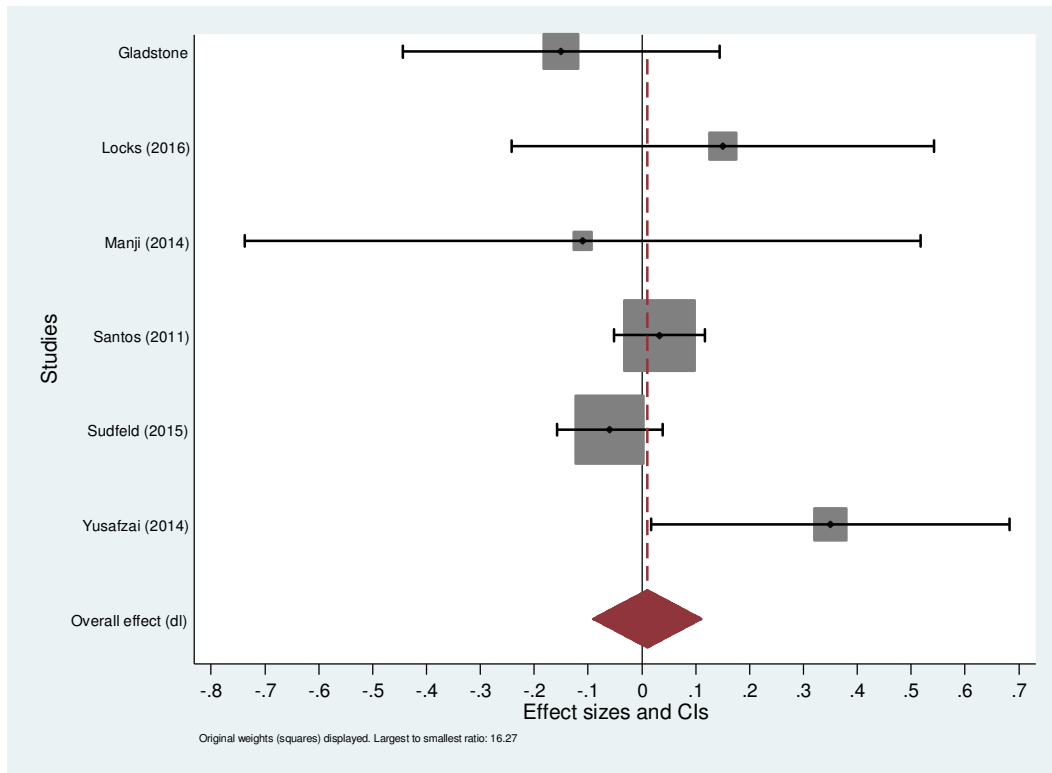

Figure 80: Association between maternal ages 15-20 (reference: ages 20-34) and language development.

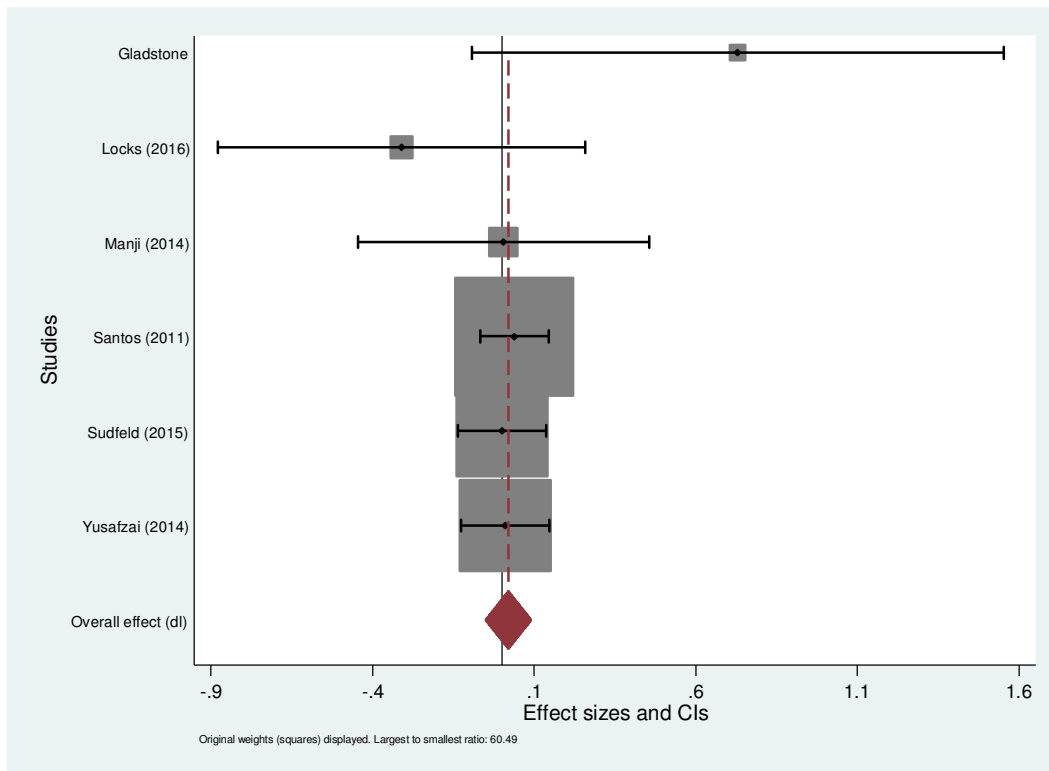

**Figure 81: Association between maternal ages >35 (reference: ages 20-34) and language development.**

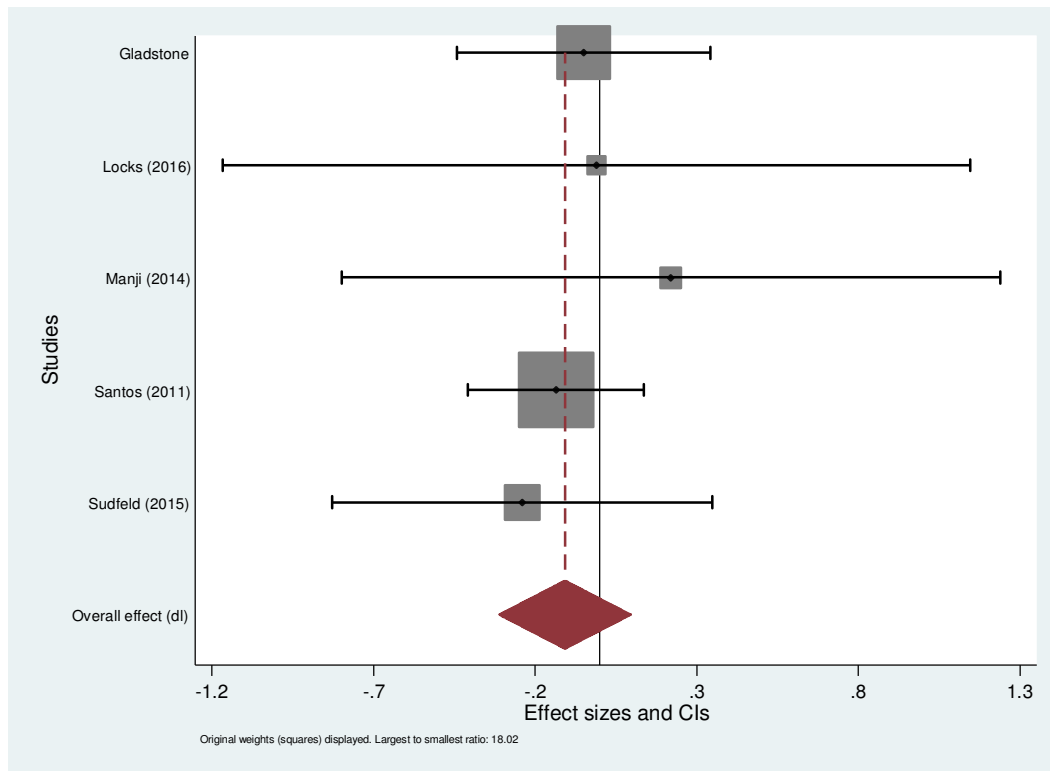

Figure 82: Association between maternal height <145 cm (reference: >155 cm) and language development.

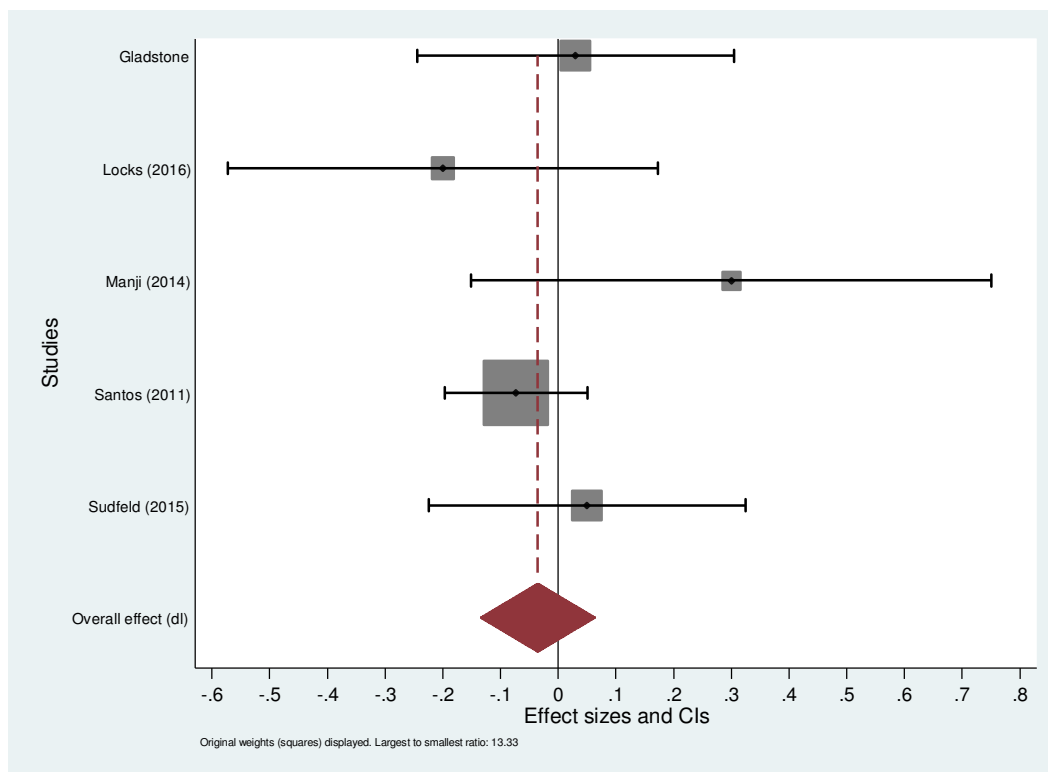

**Figure 83: Association between maternal height 145-150cm (reference: >155 cm) and language development.**

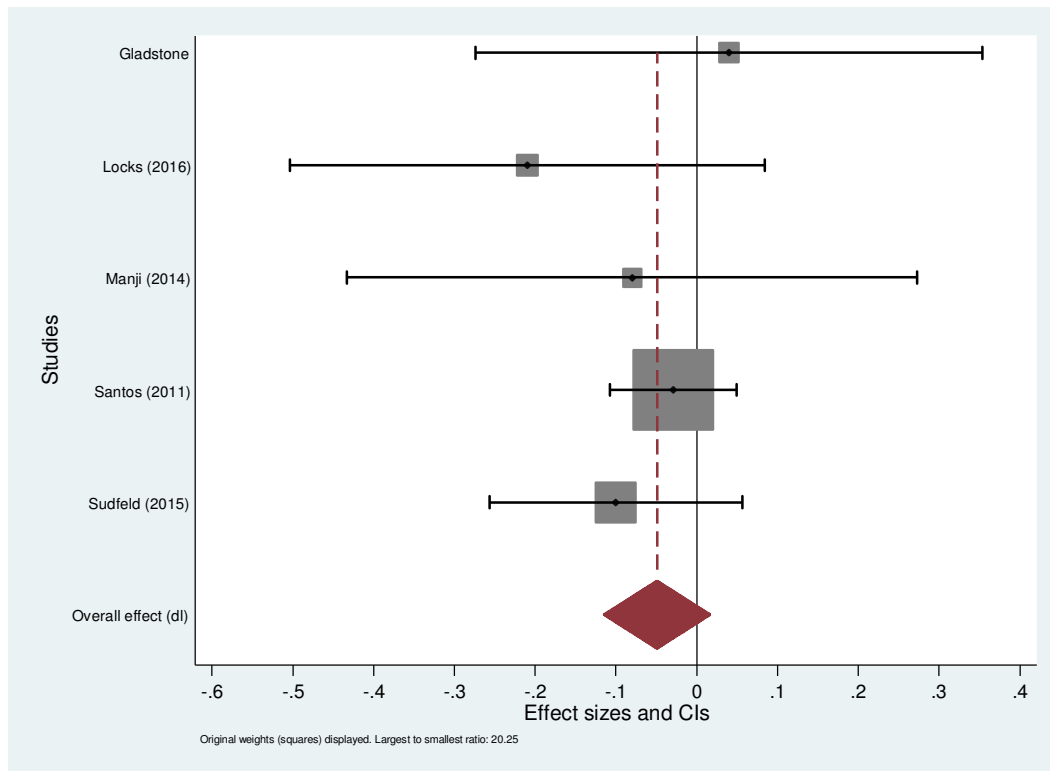

**Figure 84: Association between maternal height 150-155 cm (reference: >155 cm) and language development.**

Review only

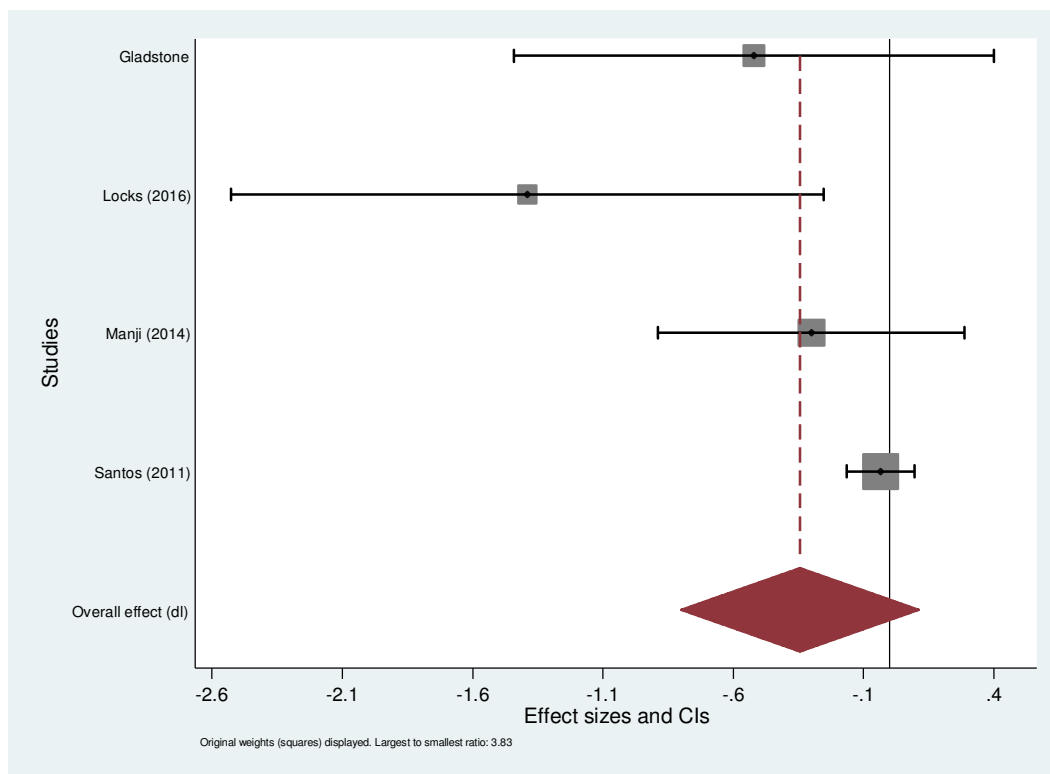

Figure 85: Association between maternal BMI 25-30 kg/m<sup>2</sup> (reference: 18.5-25) and language development.

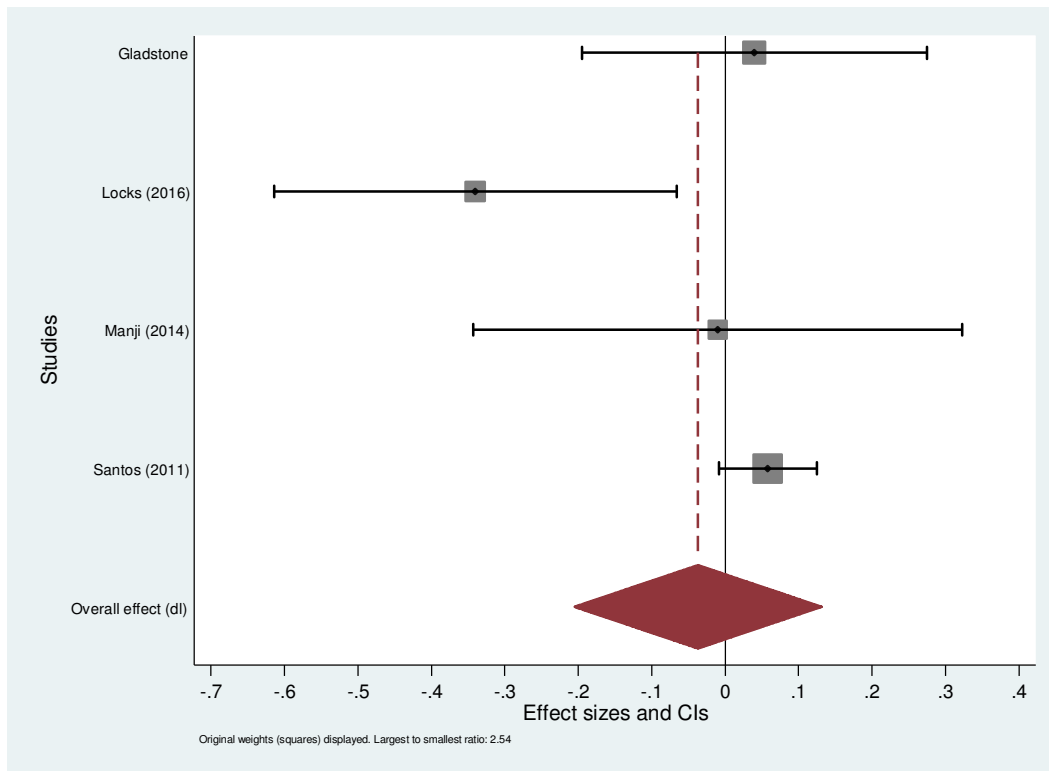

Figure 86: Association between maternal BMI >30 kg/m<sup>2</sup> (reference: 18.5-25) and language development.

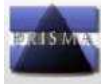

# PRISMA 2009 Checklist

| Section/topic                      | #  | Checklist item                                                                                                                                                                                                                                                                                              | Reported on page # |
|------------------------------------|----|-------------------------------------------------------------------------------------------------------------------------------------------------------------------------------------------------------------------------------------------------------------------------------------------------------------|--------------------|
| <b>TITLE</b>                       |    |                                                                                                                                                                                                                                                                                                             |                    |
| Title                              | 1  | Identify the report as a systematic review, meta-analysis, or both.                                                                                                                                                                                                                                         | No                 |
| <b>ABSTRACT</b>                    |    |                                                                                                                                                                                                                                                                                                             |                    |
| Structured summary                 | 2  | Provide a structured summary including, as applicable: background; objectives; data sources; study eligibility criteria, participants, and interventions; study appraisal and synthesis methods; results; limitations; conclusions and implications of key findings; systematic review registration number. | 5                  |
| <b>INTRODUCTION</b>                |    |                                                                                                                                                                                                                                                                                                             |                    |
| Rationale                          | 3  | Describe the rationale for the review in the context of what is already known.                                                                                                                                                                                                                              | 6                  |
| Objectives                         | 4  | Provide an explicit statement of questions being addressed with reference to participants, interventions, comparisons, outcomes, and study design (PICOS).                                                                                                                                                  | 6-7                |
| <b>METHODS</b>                     |    |                                                                                                                                                                                                                                                                                                             |                    |
| Protocol and registration          | 5  | Indicate if a review protocol exists, if and where it can be accessed (e.g., Web address), and, if available, provide registration information including registration numbers.                                                                                                                              | yes                |
| Eligibility criteria               | 6  | Specify study characteristics (e.g., PICOS, length of follow-up) and report characteristics (e.g., years considered, language, publication status) used as criteria for eligibility, giving rationale.                                                                                                      | 8                  |
| Information sources                | 7  | Describe all information sources (e.g., databases with dates of coverage, contact with study authors to identify additional studies) in the search and date last searched.                                                                                                                                  | 8                  |
| Search                             | 8  | Present full electronic search strategy for at least one database, including any limits used, such that it could be repeated.                                                                                                                                                                               | Appendix 1         |
| Study selection                    | 9  | State the process for selecting studies (i.e., screening, eligibility, included in systematic review, and, if applicable, included in the meta-analysis).                                                                                                                                                   | 8 & 10             |
| Data collection process            | 10 | Describe method of data extraction from reports (e.g., piloted forms, independently, in duplicate) and any processes for obtaining and confirming data from investigators.                                                                                                                                  | 8                  |
| Data items                         | 11 | List and define all variables for which data were sought (e.g., PICOS, funding sources) and any assumptions and simplifications made.                                                                                                                                                                       | 9                  |
| Risk of bias in individual studies | 12 | Describe methods used for assessing risk of bias of individual studies (including specification of whether this was done at the study or outcome level), and how this information is to be used in any data synthesis.                                                                                      | N/A <sup>a</sup>   |
| Summary measures                   | 13 | State the principal summary measures (e.g., risk ratio, difference in means).                                                                                                                                                                                                                               | 10                 |
| Synthesis of results               | 14 | Describe the methods of handling data and combining results of studies, if done, including measures of consistency (e.g., $I^2$ ) for each meta-analysis.                                                                                                                                                   | 10                 |



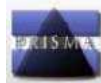

# PRISMA 2009 Checklist

Page 1 of 2

| Section/topic                 | #  | Checklist item                                                                                                                                                                                           | Reported on page # |
|-------------------------------|----|----------------------------------------------------------------------------------------------------------------------------------------------------------------------------------------------------------|--------------------|
| Risk of bias across studies   | 15 | Specify any assessment of risk of bias that may affect the cumulative evidence (e.g., publication bias, selective reporting within studies).                                                             | N/A <sup>b</sup>   |
| Additional analyses           | 16 | Describe methods of additional analyses (e.g., sensitivity or subgroup analyses, meta-regression), if done, indicating which were pre-specified.                                                         | 10                 |
| <b>RESULTS</b>                |    |                                                                                                                                                                                                          |                    |
| Study selection               | 17 | Give numbers of studies screened, assessed for eligibility, and included in the review, with reasons for exclusions at each stage, ideally with a flow diagram.                                          | Figure 1           |
| Study characteristics         | 18 | For each study, present characteristics for which data were extracted (e.g., study size, PICOS, follow-up period) and provide the citations.                                                             | Table 1            |
| Risk of bias within studies   | 19 | Present data on risk of bias of each study and, if available, any outcome level assessment (see item 12).                                                                                                | N/A <sup>b</sup>   |
| Results of individual studies | 20 | For all outcomes considered (benefits or harms), present, for each study: (a) simple summary data for each intervention group (b) effect estimates and confidence intervals, ideally with a forest plot. | Appendix 2         |
| Synthesis of results          | 21 | Present results of each meta-analysis done, including confidence intervals and measures of consistency.                                                                                                  | Tables 2 and 3     |
| Risk of bias across studies   | 22 | Present results of any assessment of risk of bias across studies (see Item 15).                                                                                                                          | N/A <sup>b</sup>   |
| Additional analysis           | 23 | Give results of additional analyses, if done (e.g., sensitivity or subgroup analyses, meta-regression [see Item 16]).                                                                                    | 11-13              |
| <b>DISCUSSION</b>             |    |                                                                                                                                                                                                          |                    |
| Summary of evidence           | 24 | Summarize the main findings including the strength of evidence for each main outcome; consider their relevance to key groups (e.g., healthcare providers, users, and policy makers).                     | 14-17              |
| Limitations                   | 25 | Discuss limitations at study and outcome level (e.g., risk of bias), and at review-level (e.g., incomplete retrieval of identified research, reporting bias).                                            | 18                 |
| Conclusions                   | 26 | Provide a general interpretation of the results in the context of other evidence, and implications for future research.                                                                                  | 18 & 19            |
| <b>FUNDING</b>                |    |                                                                                                                                                                                                          |                    |
| Funding                       | 27 | Describe sources of funding for the systematic review and other support (e.g., supply of data); role of funders for the systematic review.                                                               | 3                  |

- a. Same analyses were conducted in all individual studies by the authors and then estimates from individual studies were combined in pooled estimates. Therefore, assessment of quality of individual studies were not done.
- b. Selection of studies were not based on published literature only, a large number of the studies were unpublished

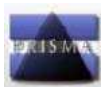

# PRISMA 2009 Checklist

From: Moher D, Liberati A, Tetzlaff J, Altman DG, The PRISMA Group (2009). Preferred Reporting Items for Systematic Reviews and Meta-Analyses: The PRISMA Statement. PLoS Med 6(7): e1000097. doi:10.1371/journal.pmed1000097

For more information, visit: [www.prisma-statement.org](http://www.prisma-statement.org).

Page 2 of 2

For peer review only

1  
2  
3  
4  
5  
6  
7  
8  
9  
10  
11  
12  
13  
14  
15  
16  
17  
18  
19  
20  
21  
22  
23  
24  
25  
26  
27  
28  
29  
30  
31  
32  
33  
34  
35  
36  
37  
38  
39  
40  
41  
42  
43  
44  
45  
46  
47

# BMJ Open

## Early life risk factors of motor, cognitive, and language development: a pooled analysis of studies from low-and middle-income countries

|                               |                                                                                                                                                                                                                                                                                                                                                                                                                                                                                                                                                                                                                                                                                                                                                                                                                                                                                                                                                                                                                                                                                                                                                                                                                                                                                                                                                                                                                                                                                                                                                                                                                                                                                                                                                                                                                                                                                                                                                                                                                                                                                                                                                                                                                                                                                                                                  |
|-------------------------------|----------------------------------------------------------------------------------------------------------------------------------------------------------------------------------------------------------------------------------------------------------------------------------------------------------------------------------------------------------------------------------------------------------------------------------------------------------------------------------------------------------------------------------------------------------------------------------------------------------------------------------------------------------------------------------------------------------------------------------------------------------------------------------------------------------------------------------------------------------------------------------------------------------------------------------------------------------------------------------------------------------------------------------------------------------------------------------------------------------------------------------------------------------------------------------------------------------------------------------------------------------------------------------------------------------------------------------------------------------------------------------------------------------------------------------------------------------------------------------------------------------------------------------------------------------------------------------------------------------------------------------------------------------------------------------------------------------------------------------------------------------------------------------------------------------------------------------------------------------------------------------------------------------------------------------------------------------------------------------------------------------------------------------------------------------------------------------------------------------------------------------------------------------------------------------------------------------------------------------------------------------------------------------------------------------------------------------|
| Journal:                      | <i>BMJ Open</i>                                                                                                                                                                                                                                                                                                                                                                                                                                                                                                                                                                                                                                                                                                                                                                                                                                                                                                                                                                                                                                                                                                                                                                                                                                                                                                                                                                                                                                                                                                                                                                                                                                                                                                                                                                                                                                                                                                                                                                                                                                                                                                                                                                                                                                                                                                                  |
| Manuscript ID                 | bmjopen-2018-026449.R2                                                                                                                                                                                                                                                                                                                                                                                                                                                                                                                                                                                                                                                                                                                                                                                                                                                                                                                                                                                                                                                                                                                                                                                                                                                                                                                                                                                                                                                                                                                                                                                                                                                                                                                                                                                                                                                                                                                                                                                                                                                                                                                                                                                                                                                                                                           |
| Article Type:                 | Research                                                                                                                                                                                                                                                                                                                                                                                                                                                                                                                                                                                                                                                                                                                                                                                                                                                                                                                                                                                                                                                                                                                                                                                                                                                                                                                                                                                                                                                                                                                                                                                                                                                                                                                                                                                                                                                                                                                                                                                                                                                                                                                                                                                                                                                                                                                         |
| Date Submitted by the Author: | 15-Aug-2019                                                                                                                                                                                                                                                                                                                                                                                                                                                                                                                                                                                                                                                                                                                                                                                                                                                                                                                                                                                                                                                                                                                                                                                                                                                                                                                                                                                                                                                                                                                                                                                                                                                                                                                                                                                                                                                                                                                                                                                                                                                                                                                                                                                                                                                                                                                      |
| Complete List of Authors:     | <p>Sania, Ayesha; Columbia University Medical Center, Neurology Sudfeld, CR; Harvard University T H Chan School of Public Health, Departments of Global Health and Population<br/> Danaei, Goodarz; Harvard School of Public Health, Global Health and Population<br/> Fink, Günther ; Schweizerisches Tropen- und Public Health-Institut, Household Economics and Health System Research Unit<br/> McCoy, D; Harvard Graduate School of Education<br/> Zhu, Zhaozhong; Harvard University T H Chan School of Public Health<br/> Fawzi, Mary C; Harvard Medical School, Department of Global Health and Social Medicine<br/> Akman, Mehmet; Marmara University School of Medicine,<br/> Arifeen, Shams E.; ICDDR B, Maternal and Child Health Division (MCHD)<br/> Barros, Aluisio; Federal University of Pelotas, Pelotas, Brazil<br/> Bellinger, David; Harvard Medical School<br/> Black, Maureen; University of Maryland School of Medicine,<br/> Bogale, Alemtsehay; The Nature's Bounty Co<br/> Braun, Joseph M; Brown University School of Public Health<br/> van den Broek, Nynke; Liverpool School of Tropical Medicine, aternal and Newborn Health; Liverpool School of Tropical Medicine<br/> Carrara, Verena; Shoklo Malaria Research Unit<br/> Duazo, Paulita; University of San Carlos<br/> Duggan, Christopher; Children's Hospital Boston<br/> Fernald, Lia; University of California, Berkeley, School of Public Health<br/> Gladstone, Melissa; University of Liverpool Institute of Translational Medicine, Women and Children's Health<br/> Hamadani, Jena; International Centre for Diarrhoeal Disease Research<br/> Handal, Alexis; University of New Mexico<br/> Harlow, Siobán; University of Michigan School of Public Health<br/> Hidrobo, Melissa; International Food Policy Research Institute<br/> Kuzawa, Chris ; Northwestern University, Department of Anthropology<br/> Kvestad, Ingrid; Uni Health, Uni Research, Regional Centre for Child and Youth Mental Health and Child Welfare<br/> Locks, Lindsey; Harvard University T H Chan School of Public Health, Nutrition<br/> Manji, Karim; Muhibili University of Health and Allied Sciences, Department of Pediatrics and Child Health<br/> Masanja, Honorati; Ifakara Health Institute, P.O Box 78373, Dar es Salaam, Tanzania, Health</p> |

|                                    |                                                                                                                                                                                                                                                                                                                                                                                                                                                                                                                                                                                                                                                                                                                                                                                                                                                                                                                                                                                                                                                                                                                                                                                                                                                                                                                                                                                                                                                                               |
|------------------------------------|-------------------------------------------------------------------------------------------------------------------------------------------------------------------------------------------------------------------------------------------------------------------------------------------------------------------------------------------------------------------------------------------------------------------------------------------------------------------------------------------------------------------------------------------------------------------------------------------------------------------------------------------------------------------------------------------------------------------------------------------------------------------------------------------------------------------------------------------------------------------------------------------------------------------------------------------------------------------------------------------------------------------------------------------------------------------------------------------------------------------------------------------------------------------------------------------------------------------------------------------------------------------------------------------------------------------------------------------------------------------------------------------------------------------------------------------------------------------------------|
|                                    | Matijasevich, Alicia; Universidade de Sao Paulo Faculdade de Medicina<br>McDonald, Christine; UCSF Benioff Children's Hospital Oakland<br>McGready, Rose; Shoklo Malaria Research Unit, Mahidol-Oxford Tropical<br>Medicine Research Unit, Faculty of Tropical Medicine, Mahidol University;<br>Centre for Tropical Medicine and Global Health, Nuffield Department of<br>Medicine, University of Oxford<br>Rizvi, Arjumand; Aga Khan Medical University, Pediatrics and Child<br>Health<br>Santos, Darci; Universidade Federal da Bahia<br>Santos, Leticia ; Universidade Federal da Bahia<br>Save, Dilsad ; Marmara Universitesi Tip Fakultesi<br>Shapiro, Roger; Harvard University T H Chan School of Public Health,<br>Department of Immunology and Infectious Disease<br>Stoecker, Barbara; Oklahoma State University College of Human<br>Environmental Sciences, Department of Nutritional Sciences<br>Strand, Tor A. ; Sykehuset Innlandet Helseforetak, Research<br>Taneja, Sunita; Centre for Health Research and Development, Society<br>for Applied Studies<br>Tellez-Rojo, Martha-Maria; Instituto Nacional de Perinatologia<br>Tofail, Fahmida; International Centre for Diarrhoeal Disease Research,<br>Centre for Nutrition & Food Security<br>Yousafzai, Aisha; Harvard University T H Chan School of Public Health<br>Ezzati, Majid; Imperial College London School of Public Health<br>Fawzi, Wafaie.; Harvard University T H Chan School of Public Health |
| <b>Primary Subject<br>Heading</b>: | Global health                                                                                                                                                                                                                                                                                                                                                                                                                                                                                                                                                                                                                                                                                                                                                                                                                                                                                                                                                                                                                                                                                                                                                                                                                                                                                                                                                                                                                                                                 |
| Secondary Subject Heading:         | Epidemiology, Paediatrics, Public health                                                                                                                                                                                                                                                                                                                                                                                                                                                                                                                                                                                                                                                                                                                                                                                                                                                                                                                                                                                                                                                                                                                                                                                                                                                                                                                                                                                                                                      |
| Keywords:                          | Community child health < PAEDIATRICS, Developmental neurology &<br>neurodisability < PAEDIATRICS, PUBLIC HEALTH                                                                                                                                                                                                                                                                                                                                                                                                                                                                                                                                                                                                                                                                                                                                                                                                                                                                                                                                                                                                                                                                                                                                                                                                                                                                                                                                                               |
|                                    |                                                                                                                                                                                                                                                                                                                                                                                                                                                                                                                                                                                                                                                                                                                                                                                                                                                                                                                                                                                                                                                                                                                                                                                                                                                                                                                                                                                                                                                                               |

SCHOLARONE™  
Manuscripts

## Early life risk factors of motor, cognitive, and language development: a pooled analysis of studies from low-and middle-income countries

Ayesha Sania<sup>1</sup>(M.B.B.S, Sc.D), Christopher Sudfeld<sup>2</sup>(Sc.D), Goodarz Danaei<sup>2,3</sup>(Sc.D), Günther Fink<sup>4</sup>(Ph.D), Dana Charles McCoy<sup>5</sup>(Ph.D), Zhaozhong Zhu<sup>6</sup>(Sc.D), Mary C. Smith Fawzi<sup>7</sup>(Sc.D), Mehmet Akman<sup>8</sup>(MD, MPH), Shams Arifeen<sup>9</sup>(M.B.B.S, Dr.PH), Aluisio J. D. Barros<sup>10</sup>(MD, Ph.D), David Bellinger<sup>6,11</sup>(Ph.D), Maureen Black<sup>12</sup>(Ph.D), Alemtsehay Bogale<sup>13</sup>(Ph.D), Joseph Braun<sup>14</sup>(Ph.D), Nynke van den Broek<sup>15</sup>(Ph.D, FRCOG), Verena Ilona Carrara<sup>16</sup>(MD, Ph.D), Paulita Duazo<sup>17</sup>(BS), Christopher P. Duggan<sup>2,18,19</sup>(MD, MPH), Lia Fernald<sup>20</sup>(Ph.D, MBA), Melissa Gladstone<sup>21</sup>(MD, MRCP), Jena Hamadani<sup>9</sup>(Ph.D), Alexis J. Handal<sup>22</sup>(Ph.D., MPH), Siobán Harlow<sup>23</sup>(Ph.D.), Melissa Hidrobo<sup>24</sup>(Ph.D), Christopher W. Kuzawa<sup>25</sup>(Ph.D), Ingrid Kvestad<sup>26</sup>(Ph.D), Lindsey Locks<sup>18</sup>(Sc.D), Karim Manji<sup>27</sup>(MD, MPH), Honorati Masanja<sup>28</sup>(Ph.D), Alicia Matijasevich<sup>29</sup>(MD, Ph.D), Christine McDonald<sup>30</sup>(Sc.D), Rose McGready<sup>31</sup>(Ph.D), Arjumand Rizvi<sup>32</sup>(MPhil), Darci Santos<sup>33</sup> (Ph.D), Leticia Santos<sup>33</sup>(Ph.D), Dilsad Save<sup>34</sup>(MD, MPH), Roger Shapiro<sup>35</sup>(MD, MPH), Barbara J. Stoecker<sup>36</sup>(Ph.D), Tor A. Strand<sup>37,38</sup>(MD, Ph.D), Sunita Taneja<sup>39</sup>(Ph.D), Martha-Maria Tellez-Rojo<sup>40</sup>(Ph.D), Fahmida Tofail<sup>41</sup>(M.B.B.S, Ph.D), Aisha K.Yousafzai<sup>2</sup>(Ph.D), Majid Ezzati<sup>42</sup>(Ph.D), Wafaie Fawzi<sup>2</sup>(M.B.B.S., Dr.PH)

### Affiliations:

<sup>1</sup>ICAP, Columbia University, Mailman School of Public Health, 722 W 168th St, New York, NY 10032, USA

<sup>2</sup>Department of Global Health and Population, Harvard T. H. Chan School of Public Health, 665 Huntington Ave, Boston, MA 02115, USA

<sup>3</sup>Department of Epidemiology, Harvard T. H. Chan School of Public Health, 677 Huntington Ave, Boston, MA 02115, USA

<sup>4</sup> Household Economics and Health System Research Unit, Swiss Tropical and Public Health Institute, Socinstrasse 57, 4002 Basel, Switzerland

<sup>5</sup>Harvard Graduate School of Education, Harvard University, 13 Appian Way, Cambridge, MA 02138, USA

<sup>6</sup>Department of Environmental Health, Harvard T. H. Chan School of Public Health, 665 Huntington Ave, Boston, MA 02115, USA

<sup>7</sup>Department of Global Health and Social Medicine, Harvard Medical School, 641 Huntington Ave, Boston, MA 02115, USA

<sup>8</sup>Department of Family Medicine, Marmara University Faculty of Medicine, Pendik, Istanbul, Turkey

<sup>9</sup>Maternal and Child Health Division, icddr,b, Dhaka, Bangladesh

<sup>10</sup>International Center for Equity in Health, Federal University of Pelotas, Pelotas, Brazil

<sup>11</sup>Boston Children's Hospital, 300 Longwood Ave, Boston, MA 02115, USA

<sup>12</sup>Department of Pediatrics, University of Maryland School of Medicine, 737 W. Lombard Street, Baltimore, MD 21201, USA

- 1  
2  
3 <sup>13</sup>The Nature's Bounty Co, 2100 Smithtown Avenue, Ronkonkoma, NY 11779, USA  
4 <sup>14</sup>Department of Epidemiology, Brown University School of Public Health, 121 South Main  
5 Street, Providence, RI 02912, USA  
6  
7 <sup>15</sup>Centre for Maternal and Newborn Health, Liverpool School of Tropical Medicine, University  
8 of Liverpool, Pembroke Place, Liverpool L3 5QA, UK  
9  
10 <sup>16</sup>Shoklo Malaria Research Unit, Mahidol-Oxford Tropical Medicine Research Unit, Faculty of  
11 Tropical Medicine, Mahidol University, Mae Sot, Thailand  
12  
13 <sup>17</sup>Office of Population Studies, University of San Carlos, Cebu City, Philippines  
14  
15 <sup>18</sup>Department of Nutrition, Harvard T. H. Chan School of Public Health, 665 Huntington Ave,  
16 Boston, MA 02115, USA  
17  
18 <sup>19</sup>Center for Nutrition, Boston Children's Hospital, 300 Longwood Ave, Boston, MA 02115,  
19 USA  
20  
21 <sup>20</sup>Public Health Nutrition and Community Health Sciences, University of California Berkeley  
22 School of Public Health, Berkeley, CA 94720, USA  
23  
24 <sup>21</sup>Department of Women's and Children's Health, Institute of Translational Medicine, University  
25 of Liverpool, Liverpool L8 7SS, UK  
26  
27 <sup>22</sup>College of Population Health, UNM Health Sciences Center, University of New Mexico,  
28 Albuquerque, NM 87131, USA  
29  
30 <sup>23</sup>Department of Epidemiology, School of Public Health, University of Michigan, 1415  
31 Washington Heights, Ann Arbor, MI 48109, USA  
32  
33 <sup>24</sup>Poverty, Health and Nutrition Division, International Food Policy Research Institute,  
34 Washington, DC, USA  
35  
36 <sup>25</sup>Department of Anthropology, Northwestern University, 1810 Hinman Avenue, Evanston, IL  
37 60208, USA  
38  
39 <sup>26</sup>Regional Centre for Child and Youth Mental Health and Child Welfare, Uni Research Health  
40 Department, Uni Research, Bergen, Norway  
41  
42 <sup>27</sup>Department of Paediatrics and Child Health, Muhimbili University of Health and Allied  
43 Sciences, Dar es Salaam, Tanzania  
44  
45 <sup>28</sup>Ifakara Health Institute, Tanzania  
46  
47 <sup>29</sup>Department of Preventive Medicine, School of Medicine, University of São Paulo, São Paulo,  
48 Brazil  
49  
50 <sup>30</sup>Children's Hospital Oakland Research Institute, UCSF Benioff Children's Hospital, Oakland,  
51 CA 94609, USA  
52  
53 <sup>31</sup>Mahidol University Faculty of Tropical Medicine. Shoklo Malaria Research Unit, Mahidol-  
54 Oxford Tropical Medicine Research Unit, Mae Sot, Thailand  
55  
56 <sup>32</sup>Department of Paediatrics and Child Health, Aga Khan University, Karachi, Pakistan  
57  
58 <sup>33</sup>Department of Collective Health, Institute of Collective Health, Federal University of Bahia,  
59 Salvador, Bahia, Brazil  
60  
61 <sup>34</sup>Marmara University School of Medicine, Department of Public Health, Istanbul, Turkey  
62  
63 <sup>35</sup>Department of Immunology and Infectious Disease, Harvard T. H. Chan School of Public  
64 Health, 665 Huntington Ave, Boston, MA 02115, USA  
65  
66 <sup>36</sup>Department of Nutritional Sciences, College of Human Environmental Sciences, Oklahoma  
67 State University, Stillwater, OK 74078, USA

<sup>37</sup>Department of Laboratory Medicine, Sykehuset Innlandet, Lillehammer, Norway

<sup>38</sup>Centre for International Health, University of Bergen, Bergen, Norway

<sup>39</sup>Center for Health Research and Development, Society for Applied Studies, New Delhi, India

<sup>40</sup>Division of Research on Public Health, National Institute of Perinatology, Mexico City, Mexico

<sup>41</sup>Nutrition and Clinical Services Division, icddr,b, Dhaka, Bangladesh

<sup>42</sup> School of Public Health, Imperial College London, London W2 1PG, UK

**Corresponding author:** Ayesha Sania,

Department of Psychiatry,

Columbia University Medical Center\*, 1051 Riverside Drive, New York, NY 10032, USA.

Email: ays328@mail.harvard.edu

\*Current affiliation

**Short title:** Risk factors of child development in LMIC

**Financial Disclosure:** The authors have no financial relationships relevant to this article to disclose.

**Role of funding source:**

This study was supported by Grand Challenges Canada under the Saving Brains program (grant # 0073-03) to Harvard T. H. Chan School of Public Health. Ayesha Sania was supported by National Institute of Allergy & Infectious Diseases of the National Institutes of Health under award number T32AI114398. The funding source was not involved in the design, conduct, analysis, interpretation, and writing up of the results, nor the decision to submit it for publication. The authors are independent from the study sponsors.

**Potential Conflicts of Interest:** The authors have no conflicts of interest relevant to this article to disclose

**Ethics committee approval:** The pooled study was approved by the Harvard T.H. Chan School of Public Health (IRB16-0256).

**Abbreviations:**

AGA= Appropriate for gestational age

BSID=Bayley Scales of Infant and Toddler Development

IUGR= intra-uterine growth restriction

LBW= Low birth weight, <2500 grams

LMIC= Low-and-middle income countries

LMP= last menstrual period

ECD=Early childhood development

SDGs=Sustainable Development Goals

SMDs=standardized mean differences

SGA=Small-for-gestational age

**Data availability:**

Data included in the study may be available upon request. This study contains deidentified data from 21 studies. Of them, 14 investigators have shared their data with researchers at Harvard School of Public Health and seven shared results of analyses. Therefore, permission from investigators of individual studies needs to be obtained before data sharing. All forest plots of the meta-analyses of each risk factors have been uploaded as supplementary document and will be publicly available.

**Word Count:**

Abstract: 293

Manuscript: 3553

**Authors' contributions:**

Ayesha Sania conceptualized the study, conducted the literature review, data analysis and drafted the manuscript. Christopher Sudfeld, and Wafaie Fawzi conceptualized the study and drafted the manuscript. Goodarz Danaei, Günther Fink, Dana Charles McCoy, Mary C. Smith Fawzi and Majid Ezzati provided critical input in the study design, interpretation of results and reviewed the manuscript. Zhaozhong Zhu participated in literature review and data analysis for the study. Mehmet Akman, Shams Arifeen, Aluísio J. D. Barros, David Bellinger, Maureen Black, Alemtsehay Bogale, Joseph Braun, Nynke van den Broek, Verena Ilona Carrara, Paulita Duazo, Christopher P. Duggan, Lia Fernald, Melissa Gladstone, Jena Hamadani, Alexis J. Handal, Siobán Harlow, Melissa Hidrobo, Christopher W. Kuzawa, Ingrid Kvestad, Lindsey Locks, Karim Manji, Honorati Masanja, Alicia Matijasevich, Christine McDonald, Rose McGready, Arjumand Rizvi, Darci Santos, Leticia Santos, Dilsad Save, Roger Shapiro, Barbara J. Stoecker, Tor A. Strand, Sunita Taneja, Martha-Maria Tellez-Rojo, Fahmida Tofail, and Aisha K.Yousafzai contributed data to the study, analyzed data and reviewed the manuscript. All authors had full access to their respective study data and to all statistical reports and tables of the pooled analyses and can take responsibility for the integrity of the data and accuracy of data



1  
2  
3 analyses. The corresponding author attests that all listed authors meet authorship criteria and that  
4  
5 no others meeting the criteria have been omitted.  
6  
7  
8  
9  
10  
11  
12  
13  
14  
15  
16  
17  
18  
19  
20  
21  
22  
23  
24  
25  
26  
27  
28  
29  
30  
31  
32  
33  
34  
35  
36  
37  
38  
39  
40  
41  
42  
43  
44  
45  
46  
47  
48  
49  
50  
51  
52  
53  
54  
55  
56  
57  
58  
59  
60

For peer review only

**Abstract:**

**Objective:** To determine the magnitude of relationships of early life factors with child development in LMICs.

**Design:** Meta-analyses of standardized mean differences (SMD) estimated from published and unpublished data.

**Data sources:** We searched Medline, bibliographies of key articles and reviews, and grey literature to identify studies from LMICs that collected data on early life exposures and child development. The most recent search was done on November 4, 2014. We then invited the first authors of the publications and investigators of unpublished studies to participate in the study.

**Eligibility criteria for selecting studies:** Studies that assessed at least one domain of child development in at least 100 children under 7 years of age and collected at least one early life factor of interest were included in the study.

**Analyses:** Linear regression models were used to assess SMDs in child development by parental and child factors within each study. We then produced pooled estimates across studies using random effects meta-analyses.

**Results:** We retrieved data from 21 studies including 20,882 children across 13 LMICs, to assess the associations of exposure to 14 major risk factors with child development. Children of mothers with secondary schooling had 0.14 SD (95% Confidence Interval, CI: 0.05, 0.25) higher cognitive scores compared to children whose mothers had primary education. Preterm birth was associated with 0.14 SD (-0.24, -0.05) and 0.23 SD (-0.42, -0.03) reductions in cognitive and motor scores, respectively. Maternal short stature, anemia in infancy, and lack of access to clean water and sanitation had significant negative associations with cognitive and motor development with effects ranging from -0.18 to -0.10 SDs.

**Conclusions:** Differential parental, environmental, and nutritional factors contribute to disparities in child development across LMICs. Targeting these factors from pre-pregnancy through childhood may improve health and development of children.

**Funding:** Grand Challenges Canada under the Saving Brains program (grant # 0073-03), National Institute of Health (grant # T32AI114398).

**Strengths and Limitations of this study:**

- Pooling data from 21 studies, this study provides the most comprehensive analysis of early life risk factors of child development in low-and middle-income countries
- The study cohorts were selected from 13 countries across the globe
- Uniform classifications of early life exposures and statistical analyses applied across studies
- 14 major risk factors, - parental, environmental and nutritional factors are included
- Data on important risk factors such as exposure to environmental neurotoxicants, responsive parenting behaviors, and child stimulation were not available

For peer review only

## Introduction:

More than 250 million children under age 5 years in low-and middle-income countries (LMICs) are at risk of not attaining their full development potential.<sup>1-3</sup> The first 1000 days (from conception through 24 months of age) is critical for children's development, as the plasticity of the rapidly developing brain makes it vulnerable to harmful exposures as well as receptive to positive stimuli during this period.<sup>4,5</sup> Suboptimal development in early childhood may have long-term detrimental effects on education<sup>6</sup> and income attainment,<sup>7</sup> which in turn contribute to poverty and inequality across the lifecycle, and possibly also across generations.<sup>8</sup> Disadvantaged children with developmental deficits lose an estimated 19.8% of adult income yearly,<sup>9</sup> with an estimated global cost of US\$ 177 billion for physical growth delays alone.<sup>10</sup> In recognition of the high burden and cost associated with early life disadvantage, the 2030 Sustainable Development Goals (SDGs) directly target early childhood development under SDG 4,<sup>11</sup> which calls for ensuring access to quality early childhood development care and pre-primary education for all children.

The relative importance of exposures to nutritional, socioeconomic and environmental risk factors in early life on different domains of child development in LMICs is poorly understood. Studies systematically reviewing the evidence linking early life risk factors to child outcomes primarily focused on growth (e.g., stunting),<sup>9,12</sup> identifying iodine deficiency, iron deficiency anemia, intrauterine growth restriction, maternal depression, exposure to violence, HIV infection as risk factors, and cognitive stimulation, maternal education, breastfeeding as protective factors.<sup>13,14</sup> However, the independent pathways from these risks to cognitive, motor and language development are not fully elucidated yet.<sup>15,16</sup> Consequently, priority risk factors and

1  
2  
3 interventions for improving cognitive, language, and motor development may differ from those  
4  
5 designed to improve physical development in LMICs.  
6

7  
8 To determine the magnitude of the relationships linking early life exposures with child  
9  
10 development in LMICs, we pooled data from 21 studies conducted in LMICs. We then examined  
11  
12 the associations of early life risk factors on cognitive, motor and language development among  
13  
14 children aged less than 7 years across studies. These pooled observational estimates are intended  
15  
16 to inform the design of individual and packaged intervention studies to promote early child  
17  
18 development in LMICs.  
19  
20  
21  
22  
23  
24  
25  
26  
27  
28  
29  
30  
31  
32  
33  
34  
35  
36  
37  
38  
39  
40  
41  
42  
43  
44  
45  
46  
47  
48  
49  
50  
51  
52  
53  
54  
55  
56  
57  
58  
59  
60

## Methods

### *Study identification:*

We searched Medline, bibliographies of key articles and reviews, and grey literature to identify datasets from low-income and middle-income countries (LMICs) that collected data on early life exposures and child development. Search terms included a list of risk factors, terms related to motor, cognitive, language and socioemotional development, and a list of low and middle income countries (list of search terms, appendix 1). The most recent search was done on November 4, 2014. We also identified additional datasets via communication with researchers of published studies that were not retrieved in our search. The primary criterion for inclusion of the datasets was the assessment of at least one domain of child development (cognitive, motor, language and socioemotional) using a standard child development assessment instrument in at least 100 children before 7 years of age, as well as the collection of at least one early life factor of interest as part of the study.

Following identification of the potential datasets, we contacted 50 first authors of the publications and investigators of unpublished studies, of whom 33 (66%) responded to participate in the present study (figure 1). We asked researchers to complete a survey that included questions about child development assessment tools used, age of developmental assessment and details on the early life factors measured in their study. Following the survey, 10 investigators declined to participate, 2 studies were excluded as the eligible sample size was less than 100 and 1 study was excluded as development was assessed after age 7 years. The investigators then shared results of pre-defined analyses on their data or shared data with researchers at the Harvard T.H. Chan School of Public Health to complete the analyses of individual studies and the meta-analyses.

### *Early life factors*

We created a list of early life risk factors based on the review of the current literature<sup>13 14</sup>. These risk factors are represented in the ‘Good Health’ and ‘Adequate Nutrition’ components of nurturing care framework for early childhood development proposed by the WHO<sup>17</sup>. We enquired about the availability of data on a list of risk factors in the preliminary survey sent to the investigators. Based on the survey responses, we then selected 14 early life factors that were available in at least four datasets to include in the pooled analyses. Following the standard definitions of categories used in published studies and the survey responses on how individual studies recorded data on each risk factors, we used uniform categorization of the risk factors applicable to all datasets. Risk factors were grouped into parental factors: father’s education and mother’s education (categories for each variable: none <1 year; primary 1 - <6 years; secondary 6-<10 years; higher  $\geq 10$  years), maternal age (<15 years, 15-<20 years, 20-<35 years;  $\geq 35$  years), maternal height (<145 cm, 145-<150 cm, 150-<155 cm, >155 cm) maternal body mass index (BMI; <18.5 kg/m<sup>2</sup>, 18.5-<25 kg/m<sup>2</sup>, 25-<30 kg/m<sup>2</sup>,  $\geq 30$  kg/m<sup>2</sup>), hemoglobin level during pregnancy (normal  $\geq 110$  g/L; mild anemia 100-109 g/L; moderate anemia 70-99 g/L) and child factors: birth weight (low birth weight <2500g; moderate low 2000-2500g; very low birth weight <2000g), preterm birth (preterm <37 weeks; late preterm 34-37 weeks; early preterm <34 weeks), small-for-gestational-age (SGA; <10 percentile; moderate SGA 3-<10 percentile; severe SGA <3 percentile) as determined by Alexander and Oken standards, exclusive breastfeeding until 6 months of age, hemoglobin levels in infancy (normal  $\geq 110$  g/L; mild anemia 100-109 g/L; moderate anemia 70-99 g/L), access to clean water (yes, no), access to sanitation (yes, no) and diarrhea preceding the 6 months before development assessment (yes, no). Details on the definition and categories of the risk factors are included in appendix 2. We also enquired about

1  
2  
3 data on birth spacing, maternal HIV infection, malaria, intimate partner violence and depression,  
4  
5 but a limited number of studies had data on these factors.  
6  
7  
8  
9

### 10 ***Outcomes:***

11  
12 We included cognitive, motor and language outcomes in the analyses, socioemotional outcomes  
13  
14 were not measured in a sufficient number of studies. If a study measured child development on  
15  
16 multiple occasions, we included the measurement obtained at the age closest to 24 months. Since  
17  
18 different tools were used for development assessment across studies, all development scores  
19  
20 were standardized (z-scored) to ensure comparability between the measurements in different  
21  
22 studies.  
23  
24  
25  
26  
27

### 28 ***Analyses of individual studies:***

29  
30 Within each study, linear regression models were used to assess standardized mean differences  
31  
32 (SMDs) in cognitive, motor, and language scores for the selected risk factors. Multivariable  
33  
34 models were adjusted for child's age and sex, maternal education and a measure of  
35  
36 socioeconomic status (e.g. household income or wealth index). Maternal education was adjusted  
37  
38 as a confounder in all models except for the model that estimated the effects of maternal  
39  
40 education. If a study was a randomized trial, intervention assignment was also included in the  
41  
42 adjusted model. In addition, estimates for preterm birth and gestation-specific birth weight  
43  
44 category (SGA and appropriate-for-gestational-age) were adjusted for each other. The missing  
45  
46 indicator method was used for covariates when <10% of the data were missing; if more than 10%  
47  
48 were missing the covariate was excluded from the analyses.  
49  
50  
51  
52  
53  
54  
55  
56  
57  
58  
59  
60



***Meta-analysis:***

Meta-analysis for a given risk factor was conducted if estimates from at least four studies were available. To account for the variation in tools used for measuring development we only pooled the means and standard errors of the standardized outcomes scores. As multivariable adjustment substantially changed the effect estimates, we used the adjusted effect estimates for meta-analysis. Given that heterogeneous effects seemed likely across the large variety of contexts studied, random effects meta-analysis was conducted using the DerSimonian and Laird method.<sup>18</sup> Heterogeneity was assessed using  $I^2$  statistics. All analyses were conducted using the metaan commands in Stata 12.0 (StataCorp, College Station, TX)

***Ethical consideration:***

The pooled study was approved by the Harvard T.H. Chan School of Public Health (IRB16-0256).

***Patient and Public Involvement:***

Patients and or public were not involved.

## Results:

Table 1 shows the characteristics of the studies included in the analyses. We included 21 data sets with developmental measurements on 20,882 children of which 8 were from Asia,<sup>19-26</sup> 7 were from sub-Saharan Africa,<sup>27-33</sup> 5 were from Latin America and 1 from Europe.<sup>34-39</sup> The majority of studies (n=18), including 12 randomized trials,<sup>19-23 26 27 30-33 39</sup> followed up the participants prospectively. The Bayley Scales of Infant and Toddler Development (BSID) was used to assess child development in most of the studies with, BSID-III administered in 5 studies,<sup>24 27 31-33</sup> BSID-II in 5 studies,<sup>19-22 30</sup> and BSID I in 1 study.<sup>39</sup> The Ages and Stages questionnaire was used in 2 studies,<sup>23 37</sup> and a few studies used local adaptations of standard tools.<sup>29 36</sup> The majority of the studies had data on both motor and cognitive development,<sup>19-25 27-39</sup> 1 study had data on motor development only<sup>26</sup> and 6 studies provided data on language development.<sup>29 31-34</sup> Development was assessed before age 2 years in most studies,<sup>19-27 29-35 38 39</sup> except for 3 studies that assessed development at ages between 3-6 years.<sup>28 36 37</sup>

### *Parental factors:*

Pooled estimates for the association of parental factors with child cognitive, motor, and language development are presented in Table 2. Higher attained maternal education was associated with improved cognitive, motor, and language development scores. Children whose mothers attended or completed secondary school had 0.14 SD (95% CI: 0.05, 0.25), 0.12 SD (95% CI: 0.06, 0.18), and 0.13 SD (95% CI: 0.04, 0.21) higher cognitive, motor and language scores, respectively, as compared to children whose mothers only had primary school education. Compared to children of mothers with primary education, children of mothers with  $\geq$  ten years of education scored 0.36 SD (95% CI: 0.19, 0.48), 0.26 SD (95% CI: 0.14, 0.38) and 0.21 SD (95% CI 0.09, 0.33) higher

1  
2  
3 in cognitive, motor and language scores, respectively. Children of mothers with no formal  
4 schooling scored lowest in cognitive, motor and language scores. There was a significant  
5  
6 positive association between father's education and cognitive and motor development after  
7  
8 adjusting for maternal education, although the magnitude of the effect sizes was smaller than for  
9  
10 those of maternal education. We found no significant relationships between maternal age at birth  
11  
12 and cognitive, motor, or language development.  
13  
14  
15

16  
17  
18  
19 Children of mothers with short stature (height <155 cm) tended to have lower cognitive, motor,  
20  
21 and language scores as compared with a maternal height >155cm. Children whose mothers were  
22  
23 <145cm scored 0.10 SD (95% CI -0.20, -0.004), 0.11 SD (95% CI: -0.19, -0.03), and 0.11 SD  
24  
25 (95% CI: -0.31, 0.09) lower on cognitive, motor, and language development, respectively. Low  
26  
27 maternal BMI (<18.5 kg/m<sup>2</sup>) was significantly associated with lower cognitive development  
28  
29 scores (SD: -0.10; 95% CI -0.19, -0.02), but not motor or language development. There was no  
30  
31 significant association of maternal hemoglobin with child cognition.  
32  
33  
34  
35  
36  
37

### 38 ***Child factors:***

39  
40 Pooled estimates for the association of child factors with development are presented in Table 3.  
41  
42 Compared to children born with normal birth weight, children born with low birth weight  
43  
44 (<2500g) had significantly poorer cognitive and motor scores. Children with birthweights  
45  
46 <2000g had on average 0.27 SD (95% CI: -0.49, -0.07) lower cognitive, 0.26 SD (95% CI: -0.40,  
47  
48 -0.12) lower motor and 0.28 SD (95% CI: -0.60, 0.05) lower language scores, compared with  
49  
50 normal birthweight children (≥2500 g). Compared to term and appropriate for gestational age  
51  
52 (AGA) infants, preterm-AGA infants had 0.14 SD (95% CI: -0.24, -0.05) and 0.23 SD (95% CI:  
53  
54  
55  
56  
57  
58  
59  
60

1  
2  
3 -0.42, -0.03) lower cognitive and motor scores, respectively. Term-SGA infants had poorer  
4  
5 developmental scores in some studies, but the pooled effect estimates for term-SGA, adjusted for  
6  
7 preterm birth, were not statistically significant.  
8  
9

10  
11  
12 Anemia in infancy was significantly and negatively associated with both motor and cognitive  
13  
14 development scores. Combined effect sizes of moderate anemia were -0.18 SD (95% CI -0.27, -  
15  
16 0.09) for motor and -0.11 SD (95% CI -0.12, - 0.10) for cognitive scores. Compared to children  
17  
18 residing in households with access to clean water, children without access had 0.10 SD (95% CI:  
19  
20 -0.12, -0.09) lower cognitive and 0.07 SD (95% CI: -0.16, 0.01) lower motor and 0.15 SD (95%  
21  
22 CI: -0.35, -0.05) lower language scores. Children without access to clean sanitation had 0.13 SD  
23  
24 (95% CI: -0.18, -0.07) lower cognitive and 0.10 SD (95% CI: -0.19, -0.01) lower motor scores.  
25  
26  
27 In the pooled analyses, exclusive breastfeeding until 6 months of age and diarrhea during the  
28  
29 preceding 6-month of development assessment did not have significant associations with either  
30  
31 cognitive or motor development.  
32  
33  
34

35  
36 Figures 2 and 3 present effect sizes of all risk factors included in the analyses. Forests plots of  
37  
38 metanalysis of individual risk factors are included in appendix 2, Figures 1-86.  
39  
40  
41  
42  
43  
44  
45  
46  
47  
48  
49  
50  
51  
52  
53  
54  
55  
56  
57  
58  
59  
60

### Discussion:

This pooled analysis of development assessment of 20,882 children from 21 LMIC studies determined that low maternal and paternal education, short maternal stature, low birth weight, preterm birth, anemia in infancy, and lack of access to clean water and sanitation were associated with lower child development scores among children < 7 years of age. We did not find significant associations of maternal anemia, fetal growth restriction, exclusive breastfeeding, or childhood diarrhea with development scores.

We observed a dose-response relationship between parental education and child development. While a large body of literature supports the consistent role of maternal education in promoting children's language and cognitive developments, evidence on the role of paternal education is more limited.<sup>35 40 41</sup> Recent reports suggest advanced language and cognitive development among children of more educated fathers that persisted after adjustment for family income and mothers' education.<sup>42</sup> Maternal education is associated with more warm, responsive, and stimulating home environments, which in turn are predictive of more positive developmental outcomes for children.<sup>43</sup> High maternal education is also linked with protective factors like good feeding and hygiene practices and frequent utilization of antenatal care and child immunization.<sup>44 45</sup> In addition, low maternal education is associated with known risk factors of poor child development such as malnutrition in children, and depression and stress in mothers.<sup>46 47</sup> Although prior work suggests that less educated mothers tend to be less receptive to early childhood development (ECD) messages, research also shows that their children may benefit more from ECD interventions.<sup>48</sup> Therefore, adopting a 2-generational intervention approach to empower parents and improve parenting capacity are likely to generate long-term benefits for child development.

1  
2  
3 Due to the availability of maternal education data, low maternal education can serve as a simple  
4 risk marker to target children in need of ECD intervention.<sup>49</sup>  
5  
6  
7  
8  
9

10 We found significant negative associations of preterm birth with cognitive and motor  
11 development but not with language development. Meta-analyses of studies conducted in  
12 developed countries reported lower IQ scores and cognitive functioning,<sup>50-52</sup> along with deficits  
13 in motor<sup>53</sup>, language<sup>54</sup>, and visual-spatial abilities<sup>55</sup> in preterm infants. Reduction of the  
14 intrauterine period interrupts the trajectory of neurodevelopmental processes such as synapse  
15 formation and myelination, which often leads to neurocognitive deficits.<sup>56</sup> Although most  
16 preterm infants catch up in physical growth<sup>57</sup>, this deficit in neurocognitive development often  
17 persists into childhood and adolescence.<sup>58 59</sup> Given the high incidence of preterm delivery in  
18 LMIC<sup>60</sup> and the increased survival of preterm infants with medical advances, the burden of the  
19 developmental deficits caused by preterm birth in LMIC may be increasing. There are currently  
20 few interventions to prevent preterm birth<sup>61</sup>; however, a variety of psychosocial interventions to  
21 alleviate the adverse neurodevelopmental effects of preterm birth implemented at different points  
22 in early childhood have shown modest short-term benefits.<sup>62</sup>  
23  
24  
25  
26  
27  
28  
29  
30  
31  
32  
33  
34  
35  
36  
37  
38  
39  
40  
41

42 We found that fetal growth restriction, assessed via SGA, was not significantly associated with  
43 child development. This agrees with several reports from developed countries<sup>63-65</sup> whereas others  
44 have reported adverse effects of SGA on cognitive and motor functioning<sup>32 66 67</sup>. These disparate  
45 findings could be caused by different definitions of SGA and/or timing of the developmental  
46 assessment. Most studies from LMICs used LBW (as marker of SGA), which is also caused by  
47 prematurity, a major risk predictor of child development. There is some evidence that with  
48  
49  
50  
51  
52  
53  
54  
55  
56  
57  
58  
59  
60

1  
2  
3 adequate nutrition, the developmental deficit in SGA infants is often compensated with age,  
4  
5 although the gap in physical growth remains<sup>68</sup>. This finding underscores the potentially  
6  
7 differential roles and separate causal mechanisms of effects of early life risk factors for physical  
8  
9 and mental development. It is important to note that the effect size for SGA may be biased  
10  
11 downwards considering the heterogeneity in outcome and the measurement error due to the use  
12  
13 of last menstrual period (LMP) date for the estimation of gestational age in most the studies. We  
14  
15 found significant negative associations between short maternal stature (<145 cm) and low BMI  
16  
17 (<18.5 kg/m<sup>2</sup>)<sup>69</sup> on cognitive function, which may indicate the role of chronic malnutrition of  
18  
19 mothers over their life course on pregnancy health and development of fetus. These are also  
20  
21 known risk factors of SGA,<sup>69</sup> suggesting that adverse effects of fetal growth restriction on child  
22  
23 development are possible. Further research is needed to quantify the effects of fetal growth  
24  
25 restriction on children's development and evaluate the effects of interventions to alleviate the  
26  
27 negative impacts of SGA on development.  
28  
29  
30  
31  
32  
33  
34

35 We found an adverse role of anemia in infancy with motor and cognitive development. Prior  
36  
37 studies reported significant effects of anemia on cognitive, motor and socioemotional  
38  
39 development that persisted into middle childhood during longitudinal follow-up<sup>70</sup>. Worldwide,  
40  
41 the predominant cause of anemia for infants and children is iron deficiency<sup>71</sup>, which can interfere  
42  
43 with myelination, synapse formation and protein expression during sensitive periods of  
44  
45 neurodevelopment<sup>72</sup>. Meta-analyses of randomized trials of infant iron supplementation have not  
46  
47 established an effect on child development; however statistical power to detect effect sizes of <  
48  
49 0.2 SD as our analysis predicts is limited due to few trials with large enough sample sizes.<sup>73 74</sup> In  
50  
51 our pooled analyses, maternal anemia during pregnancy, an important determinant of anemia in  
52  
53  
54  
55  
56  
57  
58  
59  
60

1  
2  
3 infancy<sup>75</sup>, was not significantly associated with children's development. We also did not find a  
4  
5 significant association between exclusive breastfeeding until 6 months of age and children's  
6  
7 development. Nevertheless, few studies included in our pooled analyses had a sufficient number  
8  
9 of infants who were exclusively breastfed until six months to allow for a well-powered analysis.  
10  
11 Because of the multidimensional benefits of breastfeeding from infection prevention to fostering  
12  
13 mother-infant bonding and infant attachment, significant positive effects of exclusive  
14  
15 breastfeeding on child development are plausible. Meta-analyses of studies of effects of  
16  
17 breastfeeding on children's development reported significant increases in intelligence and  
18  
19 cognitive scores<sup>76 77</sup>; however some studies have attributed these associations entirely to the  
20  
21 presence of confounding by socioeconomic status and stimulation at home.<sup>78</sup>  
22  
23  
24  
25  
26  
27

28  
29 This study is among the first to report on the associations between lack of access to safe water  
30  
31 and sanitation and child cognitive development. The burden of developmental deficit attributed  
32  
33 to these risk factors is likely very high as a large proportion of the population in LMICs reside in  
34  
35 unhygienic environments with limited access to safe water. The effects of poor sanitation and  
36  
37 unsafe water on child cognitive development are potentially mediated through childhood anemia,  
38  
39 inflammation and undernutrition resulting from frequent enteric infections<sup>79</sup>. However, in the  
40  
41 pooled analyses, we did not find any significant adverse associations between diarrhea and  
42  
43 development, which is different from previously published evidence<sup>23 80 81</sup>. One potential  
44  
45 explanation for the lack of association found in this study may be measurement error: diarrhea is  
46  
47 inherently complex and hard to measure; variations in the definitions of episodes as well as  
48  
49 parental inability to correctly report diarrhea may have led to the failure to detect potential  
50  
51 effects of diarrhea on cognitive, motor and language development in this study.  
52  
53  
54  
55  
56  
57  
58  
59  
60



1  
2  
3 The strengths of this pooled study include the global coverage of the cohorts, the large sample  
4 size, and uniform classifications of early life exposures and statistical analyses across studies.  
5  
6 Nevertheless, there are also several limitations, including the lack of data on exposure to  
7  
8 environmental neurotoxicants, maternal depression, responsive parenting behaviors, and child  
9  
10 stimulation and early education. A recent meta-analysis determined that the potential effect of  
11  
12 responsive stimulation on cognitive development at 2 years of age was +0.42SD (95% CI: 0.36,  
13  
14 0.48)<sup>82</sup>, which is larger than all risk factors examined in our analysis. Thus, comprehensive  
15  
16 packages of environmental, nutrition, and stimulation interventions may produce larger effect  
17  
18 sizes than interventions targeting single risks. In addition, due to the observational nature of the  
19  
20 studies included in this analysis, we are unable to determine a causal relationship between  
21  
22 parental and child factors with child development. Although we have adjusted for major  
23  
24 confounders the potential for residual confounding remains. Another limitation is that we did not  
25  
26 perform any risk of bias assessments for observational studies. Nevertheless, each study adjusted  
27  
28 for the same set of factors in the pooled analyses and thereby likely minimized differences in  
29  
30 control of confounding between studies. Last, there was moderate to high levels of heterogeneity,  
31  
32 as indicated by the  $I^2$  values, in some of our pooled estimates. The magnitude of the relationship  
33  
34 for maternal education, prematurity, birthweight, SGA, and access to water and sanitation  
35  
36 appeared to vary by study cohort. As a result, cultural and other contextual factors may be  
37  
38 important in determining the strength of the relationship between health and nutrition exposures  
39  
40 with child development outcomes. Accordingly, future intervention studies should be conducted  
41  
42 among diverse study populations as their effect may importantly differ by setting.  
43  
44  
45  
46  
47  
48  
49  
50  
51  
52  
53  
54  
55  
56  
57  
58  
59  
60

1  
2  
3 In summary, in a pooled study of 21 studies in LMICs, we determined that multiple risk factors  
4 classically associated with child morbidity and mortality also appear to have negative  
5 associations with cognitive, motor, and language development. As a result, our study suggests  
6 that interventions that span pre-pregnancy through early and middle childhood may be necessary  
7 to provide optimal child development in LMICs. Future research should focus on determining  
8 the effectiveness of, and delivery strategies for comprehensive intervention packages to promote  
9 child development.  
10  
11  
12  
13  
14  
15  
16  
17  
18  
19  
20  
21  
22  
23  
24  
25  
26  
27  
28  
29  
30  
31  
32  
33  
34  
35  
36  
37  
38  
39  
40  
41  
42  
43  
44  
45  
46  
47  
48  
49  
50  
51  
52  
53  
54  
55  
56  
57  
58  
59  
60

For peer review only

1  
2  
3  
4  
5 **Key Words:**  
6

7 Motor development  
8 cognitive development  
9 Language development  
10 Early life risk factors  
11 Preterm  
12 SGA  
13 Maternal education  
14 Paternal education  
15 Maternal short stature  
16 Maternal anemia  
17 anemia in infancy,  
18 Access to clean water  
19 Access to sanitation  
20 Breastfeeding  
21 Diarrhea  
22  
23  
24  
25  
26  
27  
28  
29

30 **Figure Legends**  
31

32 Figure 1: Flow chart of study selection  
33

34 Figure 2: Pooled estimates of association between maternal factors and development  
35

36 Figure 3: Pooled estimates of association between child factors and development  
37  
38  
39  
40  
41  
42  
43  
44  
45  
46  
47  
48  
49  
50  
51  
52  
53  
54  
55  
56  
57  
58  
59  
60

Table 1: Characteristics of the included studies

| Study                              | Setting     | Primary study design                                   | Study population                        | N (data on child development) | Child development tool used                                                                                                                         | Child age in years at assessment (mean±SD) |
|------------------------------------|-------------|--------------------------------------------------------|-----------------------------------------|-------------------------------|-----------------------------------------------------------------------------------------------------------------------------------------------------|--------------------------------------------|
| <b>Asia</b>                        |             |                                                        |                                         |                               |                                                                                                                                                     |                                            |
| 1 Black (2004) <sup>19</sup>       | Bangladesh  | randomized controlled trial                            | birth cohort                            | 221                           | Bayley Scales of Infant and Toddler Development, 2nd edition (BSID-II) and the Home Observation for Measurement of the Environment (HOME) Inventory | 1.06±0.03                                  |
| 2 Tofail (2008) <sup>20</sup>      | Bangladesh  | randomized controlled trial                            | birth cohort                            | 2853 total (2116 tested)      | 2 problem-solving tests, motor index of Bayley Scales of Infant and Toddler Development, 2nd edition (BSID-II) and Wolke's behavior ratings         | 0.61±0.02                                  |
| 3 Tofail (2012) <sup>21</sup>      | Bangladesh  | randomized controlled trial                            | prospective, community-based cohort     | 249                           | Bayley Scales of Infant and Toddler Development, 2nd edition (BSID-II)                                                                              | 0.84±0.01                                  |
| 4 Taneja (2005) <sup>22</sup>      | India       | randomized placebo-controlled trial                    | Prospective, community-based cohort     | 571                           | Bayley Scales of Infant and Toddler Development, 2nd edition (BSID-II)                                                                              | 1.25±0.16                                  |
| 5 Kvestad (2015) <sup>23</sup>     | India       | randomized placebo-controlled trial                    | prospective, community-based cohort     | 422                           | Ages and Stages Questionnaire, 3 <sup>rd</sup> edition (ASQ-3)                                                                                      | 1.37±0.60                                  |
| 6 Yousafzai (2014) <sup>24</sup>   | Pakistan    | community-based cluster-randomized effectiveness trial | prospective, community-based cohort     | 1357                          | Bayley Scales of Infant and Toddler Development, 3rd edition (BSID-III)                                                                             | 11.6 ±0.83                                 |
| 7 Duazo (2010) <sup>25</sup>       | Philippines | longitudinal program evaluation                        | birth cohort                            | 4904                          | Philippines Revised Early Childhood Development Checklist (REC)                                                                                     | 1.62±0.88                                  |
| 8 McGready (2007) <sup>26</sup>    | Thailand    | randomized controlled trial                            | prospective, facility-based cohort      | 503                           | Shoklo Developmental Test                                                                                                                           | 1.62±0.02                                  |
| <b>Sub-Saharan Africa</b>          |             |                                                        |                                         |                               |                                                                                                                                                     |                                            |
| 9 Shapiro (2013) <sup>27</sup>     | Botswana    | randomized controlled trial                            | prospective, community-based cohort     | 224                           | Bayley Scales of Infant and Toddler Development, 3rd edition (BSID-III)                                                                             | 2.03±0.08                                  |
| 10 Alemtsehay (2009) <sup>28</sup> | Ethiopia    | cross-sectional study                                  | cross-sectional, community-based cohort | 100                           | Raven's Colored Progressive Matrices (CPM) and Kaufman Assessment Battery for Children-II (KABC-II)                                                 | 5.11±0.24                                  |
| 11 Gladstone (2011) <sup>29</sup>  | Malawi      | cross-sectional community-based cohort study           | community-based cohort                  | 840                           | Ten Question Questionnaire [TQQ] and Malawi Developmental Assessment Tool [MDAT]                                                                    | 1.74±0.33                                  |
| 12 McDonald (2013) <sup>30</sup>   | Tanzania    | randomized placebo-controlled trial                    | birth cohort                            | 305                           | Bayley Scales of Infant and Toddler Development, 2nd edition (BSID-II)                                                                              | 1.28±0.04                                  |
| 13 Manji (2014) <sup>31</sup>      | Tanzania    | randomized placebo-controlled trial                    | birth cohort                            | 206                           | Bayley Scales of Infant and Toddler Development, 3rd edition (BSID-III)                                                                             | 1.28±0.04                                  |
| 14 Sudfeld (2015) <sup>32</sup>    | Tanzania    | randomized placebo-controlled trial                    | birth cohort                            | 958                           | Bayley Scales of Infant and Toddler Development, 3rd edition (BSID-III)                                                                             | 2.25±0.52                                  |

|    | Study                             | Setting           | Primary study design                    | Study population                                           | N<br>(data on child<br>development) | Child development tool used                                                                                                    | Child age in<br>years at<br>assessment<br>(mean±SD) |
|----|-----------------------------------|-------------------|-----------------------------------------|------------------------------------------------------------|-------------------------------------|--------------------------------------------------------------------------------------------------------------------------------|-----------------------------------------------------|
| 15 | Locks<br>(2016) <sup>33</sup>     | Tanzania          | randomized placebo-<br>controlled trial | birth cohort                                               | 248                                 | Bayley Scales of Infant and Toddler<br>Development, 3rd edition (BSID-III)                                                     | 1.21±0.03                                           |
|    | <b>Latin America</b>              |                   |                                         |                                                            |                                     |                                                                                                                                |                                                     |
| 16 | Santos IS<br>(2011) <sup>34</sup> | Brazil            | longitudinal birth<br>cohort survey     | 2004 Pelotas birth<br>cohort                               | 3868                                | Battelle Screening Developmental<br>Inventory (BSDI)                                                                           | 1.99 ± 0.05                                         |
| 17 | Santos<br>(2008) <sup>35</sup>    | Brazil            | longitudinal birth<br>cohort survey     | Longitudinal,<br>community-based<br>cohort                 | 365                                 | Wechsler Pre-School and Primary<br>Scale of Intelligence-Revised (WPPSI-R)                                                     | 5.80±3.02                                           |
| 18 | Fernald<br>(2011) <sup>36</sup>   | Ecuador           | randomized<br>effectiveness trial       | Prospective,<br>community-based<br>cohort                  | 1265                                | MacArthur-Bates Communicative<br>Development Inventory, short form,<br>Spanish version                                         | 4.59±0.87                                           |
| 19 | Handal<br>(2008) <sup>37</sup>    | Ecuador           | cross-sectional                         | Community based,<br>selected using door-<br>to-door survey | 283                                 | Ages and Stages Questionnaire<br>(ASQ)                                                                                         | 2.46±1.46                                           |
| 20 | Braun<br>(2012) <sup>38</sup>     | Mexico            | prospective cohort study                | prospective, facility-<br>based cohort                     | 1032                                | Bayley Scales of Infant and Toddler<br>Development, 2nd edition (BSID-II)<br>McCarthy Scales of Children's Abilities<br>(MSCA) | 2.02±0.03                                           |
|    | <b>Europe</b>                     |                   |                                         |                                                            |                                     |                                                                                                                                |                                                     |
| 21 | Akman<br>(2004) <sup>39</sup>     | Europe-<br>Turkey | randomized clinical trial               | facility-based<br>hospital                                 | 108                                 | Bayley Scales of Infant and Toddler<br>Development, 1st edition (BSID-I)                                                       | 1.42±0.59                                           |

Table 2: Summary results of meta-analysis of associations of parental factors and cognitive, motor and language developments

| Risk Factor                            | Cognitive      |                                    |                 |                    | Motor          |                                    |                 |                    | Language       |                                    |                 |                    |
|----------------------------------------|----------------|------------------------------------|-----------------|--------------------|----------------|------------------------------------|-----------------|--------------------|----------------|------------------------------------|-----------------|--------------------|
|                                        | No. of studies | Adjusted <sup>1</sup> SMD (95% CI) | <i>p</i> -value | I <sup>2</sup> (%) | No. of studies | Adjusted <sup>1</sup> SMD (95% CI) | <i>p</i> -value | I <sup>2</sup> (%) | No. of studies | Adjusted <sup>1</sup> SMD (95% CI) | <i>p</i> -value | I <sup>2</sup> (%) |
| <b>Mother's education</b>              |                |                                    |                 |                    |                |                                    |                 |                    |                |                                    |                 |                    |
| No education (<1 years)                | 15             | -0.12 (-0.24, -0.008)              | 0.05            | 50.8               | 18             | -0.07 (-0.13, -0.01)               | 0.03            | 18.2               | 5              | -0.06 (-0.21, -0.09)               | 0.49            | 35.5               |
| Primary (1- <6 years)                  |                | Reference                          |                 |                    |                | Reference                          |                 |                    |                | Reference                          |                 |                    |
| Secondary (6- <10 years)               | 17             | 0.14 (0.05, 0.24)                  | < 0.01          | 59.7               | 19             | 0.12 (0.06, 0.18)                  | < 0.01          | 51.8               | 5              | 0.13 (0.04, 0.21)                  | 0.04            | 0.0                |
| Higher (≥10 years)                     | 17             | 0.36 (0.19, 0.48)                  | < 0.01          | 65.8               | 19             | 0.26 (0.14, 0.38)                  | < 0.01          | 70.6               | 5              | 0.21 (0.09, 0.33)                  | 0.03            | 0.0                |
| <b>Father's education</b>              |                |                                    |                 |                    |                |                                    |                 |                    |                |                                    |                 |                    |
| No education (<1 years)                | 13             | -0.005 (-0.08, 0.07)               | 0.91            | 0.0                | 17             | -0.08 (-0.11, -0.04)               | < 0.01          | 0.0                | 4              | 0.02 (-0.15, 0.20)                 | 0.80            | 30.0               |
| Primary (1- <6 years)                  |                | Reference                          |                 |                    |                | Reference                          |                 |                    |                | Reference                          |                 |                    |
| Secondary (6- <10 years)               | 15             | 0.06 (0.015, 0.11)                 | 0.02            | 0.0                | 17             | 0.08 (0.03, 0.13)                  | < 0.01          | 30.3               | 4              | 0.09 (0.02, 0.16)                  | 0.08            | 0.0                |
| Higher (≥10 years)                     | 15             | 0.15 (0.08, 0.21)                  | < 0.01          | 0.0                | 17             | 0.18 (0.10, 0.26)                  | < 0.01          | 42.3               | 4              | 0.22 (0.11, 0.32)                  | 0.03            | 17.9               |
| <b>Mother's age</b>                    |                |                                    |                 |                    |                |                                    |                 |                    |                |                                    |                 |                    |
| <15 years                              | 5              | -0.06 (-0.13, 0.25)                | 0.57            | 0.0                | 5              | 0.12 (-0.06, 0.30)                 | 0.25            | 0.0                | 2              | n/a                                | n/a             | n/a                |
| 15-<20 years                           | 18             | -0.007 (-0.06, 0.05)               | 0.80            | 10.7               | 20             | -0.02 (-0.11, 0.08)                | 0.75            | 83.6               | 6              | 0.01 (-0.09, 0.11)                 | 0.85            | 37.0               |
| 20-34 years                            |                | Reference                          |                 |                    |                | Reference                          |                 |                    |                | Reference                          |                 |                    |
| ≥35 years                              | 18             | -0.01 (-0.06, 0.04)                | 0.58            | 0.0                | 20             | -0.006 (-0.07, 0.05)               | 0.85            | 50.1               | 6              | 0.02 (-0.05, 0.09)                 | 0.59            | 0.0                |
| <b>Mother's height</b>                 |                |                                    |                 |                    |                |                                    |                 |                    |                |                                    |                 |                    |
| <145 cm                                | 11             | -0.10 (-0.20, -0.004)              | 0.07            | 0.0                | 13             | -0.11 (-0.19, -0.03)               | 0.02            | 21.5               | 5              | -0.11 (-0.31, 0.09)                | 0.35            | 0.0                |
| 145 -<150 cm                           | 13             | -0.11 (-0.19, -0.02)               | 0.03            | 27.1               | 15             | -0.07 (-0.16, 0.03)                | 0.17            | 71.1               | 5              | -0.06 (-0.13, 0.06)                | 0.52            | 0.0                |
| 150- <155 cm                           | 13             | -0.09 (-0.14, -0.04)               | < 0.01          | 3.3                | 15             | -0.04 (-0.09, 0.009)               | 0.14            | 31.5               | 5              | -0.05 (-0.12, 0.02)                | 0.22            | 0.0                |
| >155 cm                                |                | Reference                          |                 |                    |                | Reference                          |                 |                    |                | Reference                          |                 |                    |
| <b>Mother's BMI (kg/m<sup>2</sup>)</b> |                |                                    |                 |                    |                |                                    |                 |                    |                |                                    |                 |                    |

| Risk Factor                            | Cognitive      |                                    |                 |                    | Motor          |                                    |                 |                    | Language       |                                    |                 |                    |
|----------------------------------------|----------------|------------------------------------|-----------------|--------------------|----------------|------------------------------------|-----------------|--------------------|----------------|------------------------------------|-----------------|--------------------|
|                                        | No. of studies | Adjusted <sup>1</sup> SMD (95% CI) | <i>p</i> -value | I <sup>2</sup> (%) | No. of studies | Adjusted <sup>1</sup> SMD (95% CI) | <i>p</i> -value | I <sup>2</sup> (%) | No. of studies | Adjusted <sup>1</sup> SMD (95% CI) | <i>p</i> -value | I <sup>2</sup> (%) |
| <18.5                                  | 11             | -0.11 (-0.20, -0.02)               | 0.03            | 12.7               | 13             | -0.02 (-0.11, 0.07)                | 0.69            | 51.4               | 3              | n/a                                | n/a             | n/a                |
| 18.5 -<25                              |                | Reference                          |                 |                    |                | Reference                          |                 |                    |                | Reference                          |                 |                    |
| 25-<30                                 | 12             | 0.03 (-0.04, 0.09)                 | 0.44            | 23.3               | 14             | 0.04 (-0.03, 0.11)                 | 0.31            | 64.6               | 4              | -0.04 (-0.21, 0.13)                | 0.70            | 61.0               |
| ≥30                                    | 12             | -0.02 (-0.17, 0.14)                | 0.82            | 46.3               | 14             | -0.02 (-0.14, 0.10)                | 0.77            | 63.6               | 4              | -0.14 (-0.34, 0.06)                | 0.26            | 35.9               |
| <b>Mother's hemoglobin level (g/L)</b> |                |                                    |                 |                    |                |                                    |                 |                    |                |                                    |                 |                    |
| Normal (≥110 g/L))                     |                | Reference                          |                 |                    |                | Reference                          |                 |                    |                | Reference                          |                 |                    |
| Mild anemia (100-109 g/L)              | 4              | -0.06 (-0.15, 0.03)                | 0.28            | 0.0                | 11             | 0.06 (0.008, 0.11)                 | 0.04            | 29.7               | 1              | n/a                                | n/a             | n/a                |
| Moderate anemia (70-99 g/L)            | 4              | -0.06 (-0.19, 0.06)                | 0.39            | 0.0                | 6              | -0.01 (-0.06, 0.04)                | 0.68            | 16.3               | 1              | n/a                                | n/a             | n/a                |

<sup>1</sup>Adjusted for child's gender and age, mother's education and household wealth

Table 3: Summary results of meta-analysis of associations of child factors and cognitive, motor and language developments, standardized scores

| Risk Factor                                         | Cognitive      |                                    |                 |                    | Motor          |                                    |                 |                    | Language       |                                    |                 |                    |
|-----------------------------------------------------|----------------|------------------------------------|-----------------|--------------------|----------------|------------------------------------|-----------------|--------------------|----------------|------------------------------------|-----------------|--------------------|
|                                                     | No. of studies | Adjusted <sup>1</sup> SMD (95% CI) | <i>p</i> -value | I <sup>2</sup> (%) | No. of studies | Adjusted <sup>1</sup> SMD (95% CI) | <i>p</i> -value | I <sup>2</sup> (%) | No. of studies | Adjusted <sup>1</sup> SMD (95% CI) | <i>p</i> -value | I <sup>2</sup> (%) |
| <b>Birth weight (g)</b>                             |                |                                    |                 |                    |                |                                    |                 |                    |                |                                    |                 |                    |
| Normal ( $\geq 2500$ g)                             |                | Reference                          |                 |                    |                | Reference                          |                 |                    |                | Reference                          |                 |                    |
| Low (<2500 g)                                       | 14             | -0.13 (-0.20, -0.07)               | < 0.01          | 51.0               | 15             | -0.14 (-0.23, -0.06)               | < 0.01          | 66.5               | 5              | -0.11 (-0.22, 0.00)                | 0.12            | 74.6               |
| Moderate low (2000-2500 g)                          | 14             | -0.07 (-0.12, -0.03)               | < 0.01          | 17.2               | 15             | -0.11 (-0.20, -0.02)               | 0.03            | 64.0               | 5              | -0.05 (-0.10, 0.01)                | 0.20            | 29.6               |
| Very low (<2000 g)                                  | 14             | -0.27 (-0.49, -0.07)               | 0.02            | 74.0               | 13             | -0.26 (-0.40, -0.12)               | < 0.01          | 74.9               | 5              | -0.28 (-0.60, 0.05)                | 0.17            | 81.1               |
| <b>Gestational age (g)<sup>2</sup></b>              |                |                                    |                 |                    |                |                                    |                 |                    |                |                                    |                 |                    |
| Term ( $\geq 37$ weeks)                             |                | Reference                          |                 |                    |                | Reference                          |                 |                    |                | Reference                          |                 |                    |
| Late preterm (34-37 weeks)                          | 8              | -0.21 (-0.39, -0.04)               | 0.04            | 69.8               | 8              | -0.14 (-0.33, 0.04)                | 0.17            | 74.5               | 5              | -0.05 (-0.23, 0.13)                | 0.64            | 72.1               |
| Early preterm (<34 weeks)                           | 8              | -0.16 (-0.34, 0.31)                | 0.15            | 53.5               | 7              | -0.26 (-0.53, 0.006)               | 0.10            | 65.0               | 4              | -0.20 (-0.55, 0.15)                | 0.35            | 75.4               |
| <b>Size for gestational age<sup>3</sup></b>         |                |                                    |                 |                    |                |                                    |                 |                    |                |                                    |                 |                    |
| AGA ( $\geq 10$ percentile)                         |                | Reference                          |                 |                    |                | Reference                          |                 |                    |                | Reference                          |                 |                    |
| Moderate SGA (3-<10 percentile)                     | 8              | -0.05 (-0.11, 0.12)                | 0.16            | 0.0                | 9              | -0.01 (-0.10, 0.07)                | 0.77            | 36.6               | 4              | -0.06 (-0.18, 0.06)                | 0.40            | 29.4               |
| Severe SGA (<3 percentile)                          | 8              | -0.09 (-0.24, 0.07)                | 0.30            | 72.0               | 9              | 0.02 (-0.09, 0.12)                 | 0.78            | 37.4               | 4              | 0.03 (-0.13, 0.19)                 | 0.73            | 37.7               |
| <b>Gestational age and Size-for-gestational age</b> |                |                                    |                 |                    |                |                                    |                 |                    |                |                                    |                 |                    |
| Term-AGA                                            |                | Reference                          |                 |                    |                | Reference                          |                 |                    |                | Reference                          |                 |                    |
| Preterm-AGA                                         | 8              | -0.14 (-0.24, -0.05)               | 0.02            | 17.0               | 9              | -0.23 (-0.42, -0.03)               | 0.05            | 76.5               | 4              | -0.02 (-0.23, 0.19)                | 0.87            | 78.0               |
| Term-SGA                                            | 8              | -0.02 (-0.10, 0.06)                | 0.66            | 44.6               | 9              | -0.007 (-0.08, 0.06)               | 0.84            | 31.4               | 4              | -0.03 (-0.12, 0.06)                | 0.55            | 9.3                |
| Preterm-SGA                                         | 5              | -0.17 (-0.29, -0.05)               | 0.05            | 0.0                | 5              | -0.15 (-0.40, 0.09)                | 0.29            | 53.1               | 3              | n/a                                | n/a             | n/a                |
| <b>Exclusive breastfeeding</b>                      |                |                                    |                 |                    |                |                                    |                 |                    |                |                                    |                 |                    |
| Yes                                                 |                | Reference                          |                 |                    |                | Reference                          |                 |                    |                | Reference                          |                 |                    |
| No                                                  | 4              | -0.02 (-0.08, 0.04)                | 0.60            | 0.0                | 4              | -0.05 (-0.13, 0.04)                | 0.36            | 16.4               | 3              | n/a                                | n/a             | n/a                |



| Risk Factor                         | Cognitive      |                                    |                 |                    | Motor          |                                    |                 |                    | Language       |                                    |                 |                    |
|-------------------------------------|----------------|------------------------------------|-----------------|--------------------|----------------|------------------------------------|-----------------|--------------------|----------------|------------------------------------|-----------------|--------------------|
|                                     | No. of studies | Adjusted <sup>1</sup> SMD (95% CI) | <i>p</i> -value | I <sup>2</sup> (%) | No. of studies | Adjusted <sup>1</sup> SMD (95% CI) | <i>p</i> -value | I <sup>2</sup> (%) | No. of studies | Adjusted <sup>1</sup> SMD (95% CI) | <i>p</i> -value | I <sup>2</sup> (%) |
| <b>Child hemoglobin level (g/L)</b> |                |                                    |                 |                    |                |                                    |                 |                    |                |                                    |                 |                    |
| Normal ( $\geq 110$ g/L)            |                | Reference                          |                 |                    |                | Reference                          |                 |                    |                | Reference                          |                 |                    |
| Mild anemia (100-109 g/L)           | 9              | -0.06 (-0.13, 0.01)                | 0.14            | 27.7               | 9              | -0.03 (-0.13, 0.07)                | 0.54            | 51.2               | 3              | n/a                                | n/a             | n/a                |
| Moderate anemia (70-99 g/L)         | 9              | -0.11 (-0.12, -0.10)               | < 0.01          | 0.0                | 9              | -0.18 (-0.28, -0.09)               | < 0.01          | 49.0               | 3              | n/a                                | n/a             | n/a                |
| <b>Access to clean water</b>        |                |                                    |                 |                    |                |                                    |                 |                    |                |                                    |                 |                    |
| Yes                                 |                | Reference                          |                 |                    |                | Reference                          |                 |                    |                | Reference                          |                 |                    |
| No                                  | 8              | -0.10 (-0.12, -0.09)               | < 0.01          | 0.0                | 8              | -0.07 (-0.16, 0.01)                | 0.14            | 71.0               | 4              | -0.15 (-0.35, 0.05)                | 0.23            | 82.5               |
| <b>Access to sanitation</b>         |                |                                    |                 |                    |                |                                    |                 |                    |                |                                    |                 |                    |
| Yes                                 |                | Reference                          |                 |                    |                | Reference                          |                 |                    |                | Reference                          |                 |                    |
| No                                  | 8              | -0.13 (-0.18, -0.07)               | < 0.01          | 47.5               | 8              | -0.10 (-0.19, -0.01)               | 0.05            | 82.8               | 4              | -0.12 (-0.27, 0.03)                | 0.21            | 92.4               |
| <b>Diarrhoea</b>                    |                |                                    |                 |                    |                |                                    |                 |                    |                |                                    |                 |                    |
| Yes                                 | 5              | -0.02 (-0.16, 0.13)                | 0.84            | 66.8               | 5              | -0.02 (-0.14, 0.09)                | 0.71            | 62.8               | 2              | n/a                                | n/a             | n/a                |
| No                                  |                | Reference                          |                 |                    |                | Reference                          |                 |                    |                | Reference                          |                 |                    |

<sup>1</sup>Adjusted for child's gender and age, mother's education and household wealth

<sup>2</sup>Adjusted for small for gestational age

<sup>3</sup>Adjusted for gestational age

AGA: Appropriate for Gestational Age

SGA: Small for Gestational Age

## References

1. Black MM, Walker SP, Fernald LC, et al. Early childhood development coming of age: science through the life course. *Lancet* 2017;389(10064):77-90. doi: 10.1016/S0140-6736(16)31389-7
2. Lu C, Black MM, Richter LM. Risk of poor development in young children in low-income and middle-income countries: an estimation and analysis at the global, regional, and country level. *Lancet Glob Health* 2016;4(12):e916-e22. doi: 10.1016/S2214-109X(16)30266-2
3. McCoy DC, Peet ED, Ezzati M, et al. Early Childhood Developmental Status in Low- and Middle-Income Countries: National, Regional, and Global Prevalence Estimates Using Predictive Modeling. *PLoS Med* 2016;13(6):e1002034. doi: 10.1371/journal.pmed.1002034
4. Knudsen EI. Sensitive periods in the development of the brain and behavior. *J Cogn Neurosci* 2004;16(8):1412-25. doi: 10.1162/0898929042304796
5. Shonkoff JP, Boyce WT, McEwen BS. Neuroscience, molecular biology, and the childhood roots of health disparities: building a new framework for health promotion and disease prevention. *JAMA* 2009;301(21):2252-9. doi: 10.1001/jama.2009.754
6. Peet ED, McCoy DC, Danaei G, et al. Early Childhood Development and Schooling Attainment: Longitudinal Evidence from British, Finnish and Philippine Birth Cohorts. *PLoS One* 2015;10(9):e0137219. doi: 10.1371/journal.pone.0137219
7. Case A, Paxson C. Stature and status: Height, ability, and labor market outcomes. *J Polit Econ* 2008;116(3):499-532. doi: 10.1086/589524
8. Engle PL, Black MM, Behrman JR, et al. Strategies to avoid the loss of developmental potential in more than 200 million children in the developing world. *Lancet* 2007;369(9557):229-42. doi: 10.1016/S0140-6736(07)60112-3
9. Grantham-McGregor S, Cheung YB, Cueto S, et al. Developmental potential in the first 5 years for children in developing countries. *Lancet* 2007;369(9555):60-70. doi: 10.1016/S0140-6736(07)60032-4
10. Fink G, Peet E, Danaei G, et al. Schooling and wage income losses due to early-childhood growth faltering in developing countries: national, regional, and global estimates. *Am J Clin Nutr* 2016;104(1):104-12. doi: 10.3945/ajcn.115.123968
11. UN. The 2030 Agenda for Sustainable Development. In: United Nations, ed. New York: United Nations, 2015.
12. Danaei G, Andrews KG, Sudfeld CR, et al. Risk Factors for Childhood Stunting in 137 Developing Countries: A Comparative Risk Assessment Analysis at Global, Regional, and Country Levels. *PLoS Med* 2016;13(11):e1002164. doi: 10.1371/journal.pmed.1002164
13. Walker SP, Wachs TD, Gardner JM, et al. Child development: risk factors for adverse outcomes in developing countries. *Lancet* 2007;369(9556):145-57. doi: 10.1016/S0140-6736(07)60076-2
14. Walker SP, Wachs TD, Grantham-McGregor S, et al. Inequality in early childhood: risk and protective factors for early child development. *Lancet* 2011;378(9799):1325-38. doi: 10.1016/S0140-6736(11)60555-2
15. Prado EL, Abbeddou S, Yakes Jimenez E, et al. Effects of an intervention on infant growth and development: evidence for different mechanisms at work. *Matern Child Nutr* 2016 doi: 10.1111/mcn.12314
16. Sudfeld CR, McCoy DC, Danaei G, et al. Linear growth and child development in low- and middle-income countries: a meta-analysis. *Pediatrics* 2015;135(5):e1266-75. doi: 10.1542/peds.2014-3111
17. World Health Organization. Nurturing care for early childhood development: a framework for helping children survive and thrive to transform health and human potential 2018.
18. DerSimonian R, Laird N. Meta-analysis in clinical trials. *Control Clin Trials* 1986;7(3):177-88.

19. Black MM, Baqui AH, Zaman K, et al. Iron and zinc supplementation promote motor development and exploratory behavior among Bangladeshi infants. *Am J Clin Nutr* 2004;80(4):903-10.
20. Tofail F, Persson LA, El Arifeen S, et al. Effects of prenatal food and micronutrient supplementation on infant development: a randomized trial from the Maternal and Infant Nutrition Interventions, Matlab (MINIMat) study. *Am J Clin Nutr* 2008;87(3):704-11.
21. Tofail F, Hamadani JD, Ahmed AZ, et al. The mental development and behavior of low-birth-weight Bangladeshi infants from an urban low-income community. *Eur J Clin Nutr* 2012;66(2):237-43.
22. Taneja S, Bhandari N, Bahl R, et al. Impact of zinc supplementation on mental and psychomotor scores of children aged 12 to 18 months: a randomized, double-blind trial. *J Pediatr* 2005;146(4):506-11.
23. Kvestad I, Taneja S, Hysing M, et al. Diarrhea, stimulation and growth predict neurodevelopment in young North Indian children. *PLoS One* 2015;10(3):e0121743. doi: 10.1371/journal.pone.0121743
24. Yousafzai AK, Rasheed MA, Rizvi A, et al. Effect of integrated responsive stimulation and nutrition interventions in the Lady Health Worker programme in Pakistan on child development, growth, and health outcomes: a cluster-randomised factorial effectiveness trial. *Lancet* 2014;384(9950):1282-93. doi: 10.1016/S0140-6736(14)60455-4
25. Duazo P, Avila J, Kuzawa CW. Breastfeeding and later psychosocial development in the Philippines. *Am J Hum Biol* 2010;22(6):725-30.
26. Villegas L, McGready R, Htway M, et al. Chloroquine prophylaxis against vivax malaria in pregnancy: a randomized, double-blind, placebo-controlled trial. *Trop Med Int Health* 2007;12(2):209-18.
27. Shapiro RL, Kitch D, Ogwu A, et al. HIV transmission and 24-month survival in a randomized trial of HAART to prevent MTCT during pregnancy and breastfeeding in Botswana. *AIDS* 2013;27(12):1911-20.
28. Bogale A, Abebe Y, Stoecker BJ, et al. Iodine status and cognitive function of women and their five year-old children in rural Sidama, southern Ethiopia. *East Afr J Public Health* 2009;6(3):296-9.
29. Gladstone M, White S, Kafulafula G, et al. Post-neonatal mortality, morbidity, and developmental outcome after ultrasound-dated preterm birth in rural Malawi: a community-based cohort study. *PLoS Med* 2011;8(11):e1001121.
30. McDonald CM, Manji KP, Kupka R, et al. Stunting and wasting are associated with poorer psychomotor and mental development in HIV-exposed Tanzanian infants. *J Nutr* 2013;143(2):204-14. doi: 10.3945/jn.112.168682
31. Manji KP, McDonald CM, Kupka R, et al. Effect of multivitamin supplementation on the neurodevelopment of HIV-exposed Tanzanian infants: a randomized, double-blind, placebo-controlled clinical trial. *J Trop Pediatr* 2014;60(4):279-86. doi: 10.1093/tropej/fmu011
32. Sudfeld CR, McCoy DC, Fink G, et al. Malnutrition and Its Determinants Are Associated with Suboptimal Cognitive, Communication, and Motor Development in Tanzanian Children. *J Nutr* 2015;145(12):2705-14. doi: 10.3945/jn.115.215996
33. Locks LM, Manji KP, McDonald CM, et al. Effect of zinc and multivitamin supplementation on the growth of Tanzanian children aged 6-84 wk: a randomized, placebo-controlled, double-blind trial. *Am J Clin Nutr* 2016 doi: 10.3945/ajcn.115.120055
34. Santos IS, Barros AJ, Matijasevich A, et al. Cohort profile: the 2004 Pelotas (Brazil) birth cohort study. *Int J Epidemiol* 2011;40(6):1461-8. doi: 10.1093/ije/dyq130
35. Santos DN, Assis AM, Bastos AC, et al. Determinants of cognitive function in childhood: a cohort study in a middle income context. *BMC Public Health* 2008;8:202. doi: 10.1186/1471-2458-8-202
36. Fernald LC, Hidrobo M. Effect of Ecuador's cash transfer program (Bono de Desarrollo Humano) on child development in infants and toddlers: a randomized effectiveness trial. *Soc Sci Med* 2011;72(9):1437-46.

- 1  
2  
3 37. Handal AJ, Harlow SD, Breilh J, et al. Occupational exposure to pesticides during pregnancy and  
4 neurobehavioral development of infants and toddlers. *Epidemiology* 2008;19(6):851-9. doi:  
5 10.1097/EDE.0b013e318187cc5d  
6  
7 38. Braun JM, Hoffman E, Schwartz J, et al. Assessing windows of susceptibility to lead-induced cognitive  
8 deficits in Mexican children. *Neurotoxicology* 2012;33(5):1040-7.  
9  
10 39. Akman M, Cebeci D, Okur V, et al. The effects of iron deficiency on infants' developmental test  
11 performance. *Acta Paediatr* 2004;93(10):1391-6.  
12  
13 40. Patra K, Greene MM, Patel AL, et al. Maternal Education Level Predicts Cognitive, Language, and  
14 Motor Outcome in Preterm Infants in the Second Year of Life. *Am J Perinatol* 2016;33(8):738-44.  
15 doi: 10.1055/s-0036-1572532  
16  
17 41. Vollmer S, Bommer C, Krishna A, et al. The association of parental education with childhood  
18 undernutrition in low- and middle-income countries: comparing the role of paternal and  
19 maternal education. *Int J Epidemiol* 2016 doi: 10.1093/ije/dyw133  
20  
21 42. Pancsofar N, Vernon-Feagans L, The Family Life Project I. Fathers' Early Contributions to Children's  
22 Language Development in Families from Low-income Rural Communities. *Early Child Res Q*  
23 2010;25(4):450-63. doi: 10.1016/j.ecresq.2010.02.001  
24  
25 43. Carneiro P, Meghir C, Parey M. Maternal education, home environments, and the development of  
26 children and adolescents *Journal of the European Economic Association* 2013;11:123-60. doi:  
27 10.1111/j.1542-4774.2012.01096.x  
28  
29 44. Fein SB, Labiner-Wolfe J, Scanlon KS, et al. Selected complementary feeding practices and their  
30 association with maternal education. *Pediatrics* 2008;122 Suppl 2:S91-7. doi:  
31 10.1542/peds.2008-1315l  
32  
33 45. Simkhada B, Teijlingen ER, Porter M, et al. Factors affecting the utilization of antenatal care in  
34 developing countries: systematic review of the literature. *J Adv Nurs* 2008;61(3):244-60. doi:  
35 10.1111/j.1365-2648.2007.04532.x  
36  
37 46. Di Cesare M, Sabates R, Lewin KM. A double prevention: How maternal education can affect  
38 maternal mental health, child health and child cognitive development. *2013* 2013;4(3):14. doi:  
39 10.14301/llcs.v4i3.233 [published Online First: 2013-10-28]  
40  
41 47. Makoka D, Masibo PK. Is there a threshold level of maternal education sufficient to reduce child  
42 undernutrition? Evidence from Malawi, Tanzania and Zimbabwe. *BMC Pediatr* 2015;15:96. doi:  
43 10.1186/s12887-015-0406-8  
44  
45 48. de Souza N, Sardessai V, Joshi K, et al. The determinants of compliance with an early intervention  
46 programme for high-risk babies in India. *Child Care Health Dev* 2006;32(1):63-72. doi:  
47 10.1111/j.1365-2214.2006.00576.x  
48  
49 49. Barros AJ, Matijasevich A, Santos IS, et al. Child development in a birth cohort: effect of child  
50 stimulation is stronger in less educated mothers. *Int J Epidemiol* 2010;39(1):285-94. doi:  
51 10.1093/ije/dyp272  
52  
53 50. de Jong M, Verhoeven M, van Baar AL. School outcome, cognitive functioning, and behaviour  
54 problems in moderate and late preterm children and adults: a review. *Semin Fetal Neonatal*  
55 *Med* 2012;17(3):163-9. doi: 10.1016/j.siny.2012.02.003  
56  
57 51. McGowan JE, Alderdice FA, Holmes VA, et al. Early childhood development of late-preterm infants: a  
58 systematic review. *Pediatrics* 2011;127(6):1111-24. doi: 10.1542/peds.2010-2257  
59  
60 52. Aarnoudse-Moens CS, Weisglas-Kuperus N, van Goudoever JB, et al. Meta-analysis of  
neurobehavioral outcomes in very preterm and/or very low birth weight children. *Pediatrics*  
2009;124(2):717-28. doi: 10.1542/peds.2008-2816  
53  
54 53. de Kieviet JF, Piek JP, Aarnoudse-Moens CS, et al. Motor development in very preterm and very low-  
55 birth-weight children from birth to adolescence: a meta-analysis. *JAMA* 2009;302(20):2235-42.  
56 doi: 10.1001/jama.2009.1708  
57  
58  
59  
60

- 1  
2  
3 54. Mulder H, Pitchford NJ, Hagger MS, et al. Development of executive function and attention in  
4 preterm children: a systematic review. *Dev Neuropsychol* 2009;34(4):393-421. doi:  
5 10.1080/87565640902964524  
6  
7 55. Geldof CJ, van Wassenaer AG, de Kieviet JF, et al. Visual perception and visual-motor integration in  
8 very preterm and/or very low birth weight children: a meta-analysis. *Res Dev Disabil*  
9 2012;33(2):726-36. doi: 10.1016/j.ridd.2011.08.025  
10  
11 56. Counsell SJ, Boardman JP. Differential brain growth in the infant born preterm: current knowledge  
12 and future developments from brain imaging. *Semin Fetal Neonatal Med* 2005;10(5):403-10.  
13 doi: 10.1016/j.siny.2005.05.003  
14  
15 57. Finken MJ, Dekker FW, de Zegher F, et al. Long-term height gain of prematurely born children with  
16 neonatal growth restraint: parallelism with the growth pattern of short children born small for  
17 gestational age. *Pediatrics* 2006;118(2):640-3. doi: 10.1542/peds.2006-0103  
18  
19 58. de Kieviet JF, Zoetebier L, van Elburg RM, et al. Brain development of very preterm and very low-  
20 birthweight children in childhood and adolescence: a meta-analysis. *Dev Med Child Neurol*  
21 2012;54(4):313-23. doi: 10.1111/j.1469-8749.2011.04216.x  
22  
23 59. Mikkola K, Ritari N, Tommiska V, et al. Neurodevelopmental outcome at 5 years of age of a national  
24 cohort of extremely low birth weight infants who were born in 1996-1997. *Pediatrics*  
25 2005;116(6):1391-400. doi: 10.1542/peds.2005-0171  
26  
27 60. Blencowe H, Cousens S, Oestergaard MZ, et al. National, regional, and worldwide estimates of  
28 preterm birth rates in the year 2010 with time trends since 1990 for selected countries: a  
29 systematic analysis and implications. *Lancet* 2012;379(9832):2162-72.  
30  
31 61. Simmons LE, Rubens CE, Darmstadt GL, et al. Preventing preterm birth and neonatal mortality:  
32 exploring the epidemiology, causes, and interventions. *Semin Perinatol* 2010;34(6):408-15. doi:  
33 10.1053/j.semperi.2010.09.005  
34  
35 62. Guralnick MJ. Preventive interventions for preterm children: effectiveness and developmental  
36 mechanisms. *J Dev Behav Pediatr* 2012;33(4):352-64. doi: 10.1097/DBP.0b013e31824eaa3c  
37  
38 63. Nogel SC, Deiters L, Stemmler M, et al. Preterm small-for-gestational age children: predictive role of  
39 gestational age for mental development at the age of 2 years. *Brain Dev* 2015;37(4):394-401.  
40 doi: 10.1016/j.braindev.2014.06.012  
41  
42 64. Bickle Graz M, Tolsa JF, Fischer Fumeaux CJ. Being Small for Gestational Age: Does it Matter for the  
43 Neurodevelopment of Premature Infants? A Cohort Study. *PLoS One* 2015;10(5):e0125769. doi:  
44 10.1371/journal.pone.0125769  
45  
46 65. Tanis JC, van der Ree MH, Roze E, et al. Functional outcome of very preterm-born and small-for-  
47 gestational-age children at school age. *Pediatr Res* 2012;72(6):641-8. doi: 10.1038/pr.2012.130  
48  
49 66. Arcangeli T, Thilaganathan B, Hooper R, et al. Neurodevelopmental delay in small babies at term: a  
50 systematic review. *Ultrasound Obstet Gynecol* 2012;40(3):267-75. doi: 10.1002/uog.11112  
51  
52 67. Savchev S, Sanz-Cortes M, Cruz-Martinez R, et al. Neurodevelopmental outcome of full-term small-  
53 for-gestational-age infants with normal placental function. *Ultrasound Obstet Gynecol*  
54 2013;42(2):201-6. doi: 10.1002/uog.12391  
55  
56 68. Brandt I, Sticker EJ, Lentze MJ. Catch-up growth of head circumference of very low birth weight,  
57 small for gestational age preterm infants and mental development to adulthood. *J Pediatr*  
58 2003;142(5):463-8. doi: 10.1067/mpd.2003.149  
59  
60 69. McCowan L, Horgan RP. Risk factors for small for gestational age infants. *Best Pract Res Clin Obstet*  
61 *Gynaecol* 2009;23(6):779-93. doi: 10.1016/j.bpobgyn.2009.06.003  
62  
63 70. Lozoff B. Iron deficiency and child development. *Food Nutr Bull* 2007;28(4 Suppl):S560-71.  
64  
65 71. McLean E, Cogswell M, Egli I, et al. Worldwide prevalence of anaemia, WHO Vitamin and Mineral  
66 Nutrition Information System, 1993-2005. *Public Health Nutr* 2009;12(4):444-54. doi:  
67 10.1017/S1368980008002401

- 1  
2  
3 72. Beard JL, Felt B, Schallert T, et al. Moderate iron deficiency in infancy: biology and behavior in young  
4 rats. *Behav Brain Res* 2006;170(2):224-32. doi: 10.1016/j.bbr.2006.02.024  
5  
6 73. Pasricha SR, Hayes E, Kalumba K, et al. Effect of daily iron supplementation on health in children  
7 aged 4-23 months: a systematic review and meta-analysis of randomised controlled trials.  
8 *Lancet Glob Health* 2013;1(2):e77-86. doi: 10.1016/S2214-109X(13)70046-9  
9  
10 74. Sachdev H, Gera T, Nestel P. Effect of iron supplementation on mental and motor development in  
11 children: systematic review of randomised controlled trials. *Public Health Nutr* 2005;8(2):117-32.  
12  
13 75. Koura GK, Ouedraogo S, Le Port A, et al. Anaemia during pregnancy: impact on birth outcome and  
14 infant haemoglobin level during the first 18 months of life. *Trop Med Int Health* 2012;17(3):283-  
15 91. doi: 10.1111/j.1365-3156.2011.02932.x  
16  
17 76. Anderson JW, Johnstone BM, Remley DT. Breast-feeding and cognitive development: a meta-  
18 analysis. *Am J Clin Nutr* 1999;70(4):525-35.  
19  
20 77. Horta BL, Loret de Mola C, Victora CG. Breastfeeding and intelligence: a systematic review and meta-  
21 analysis. *Acta Paediatr* 2015;104(467):14-9. doi: 10.1111/apa.13139  
22  
23 78. Walfisch A, Sermer C, Cressman A, et al. Breast milk and cognitive development--the role of  
24 confounders: a systematic review. *BMJ Open* 2013;3(8):e003259. doi: 10.1136/bmjopen-2013-  
25 003259  
26  
27 79. Ngure FM, Reid BM, Humphrey JH, et al. Water, sanitation, and hygiene (WASH), environmental  
28 enteropathy, nutrition, and early child development: making the links. *Ann N Y Acad Sci*  
29 2014;1308:118-28. doi: 10.1111/nyas.12330  
30  
31 80. Niehaus MD, Moore SR, Patrick PD, et al. Early childhood diarrhea is associated with diminished  
32 cognitive function 4 to 7 years later in children in a northeast Brazilian shantytown. *Am J Trop*  
33 *Med Hyg* 2002;66(5):590-3.  
34  
35 81. Petri WA, Jr., Miller M, Binder HJ, et al. Enteric infections, diarrhea, and their impact on function and  
36 development. *J Clin Invest* 2008;118(4):1277-90. doi: 10.1172/JCI34005  
37  
38 82. Aboud FE, Yousafzai AK. Global health and development in early childhood. *Annu Rev Psychol*  
39 2015;66:433-57. doi: 10.1146/annurev-psych-010814-015128  
40  
41  
42  
43  
44  
45  
46  
47  
48  
49  
50  
51  
52  
53  
54  
55  
56  
57  
58  
59  
60



Figure 1: flow chart of study selection

142x187mm (300 x 300 DPI)

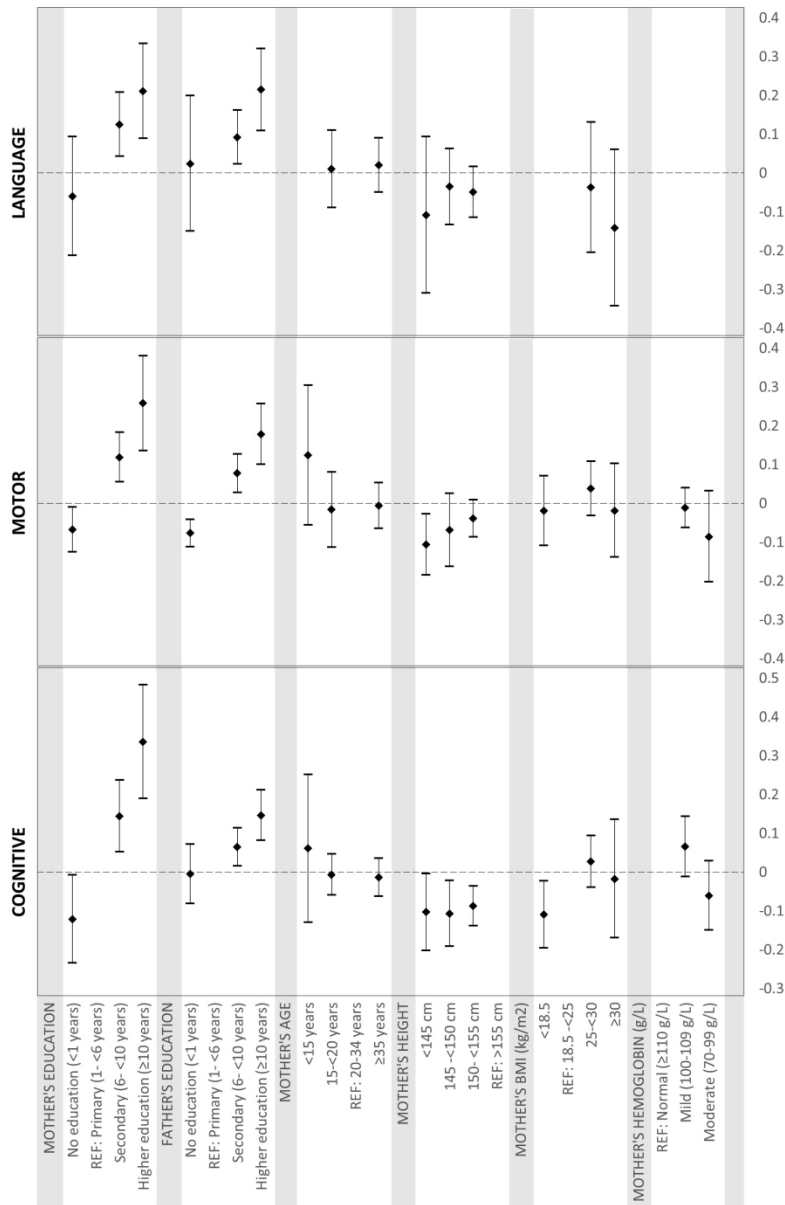

Figure 2: Pooled estimates of association between maternal factors and development

157x237mm (300 x 300 DPI)



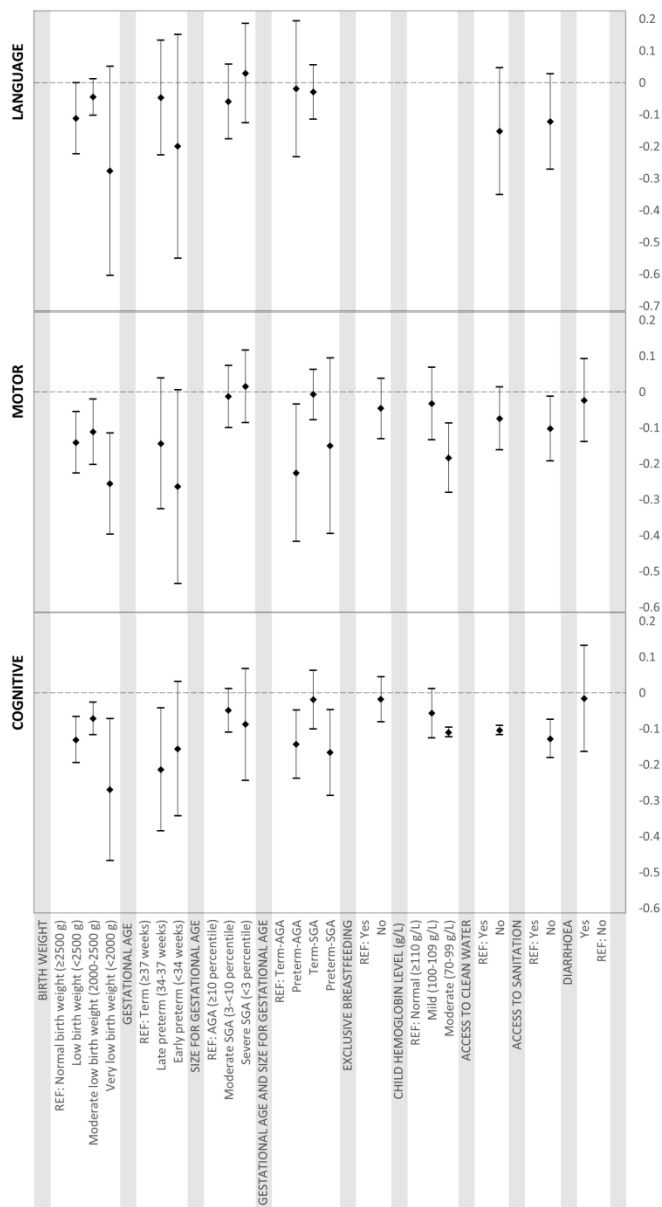

Figure 3: Pooled estimates of association between child factors and development.

157x284mm (300 x 300 DPI)

## Appendix 1: Search terms

("child"[MeSH] OR "infant"[MeSH]) AND ("child development"[MeSH] OR "cognition"[MeSH] OR "psychomotor disorders"[MeSH] OR "psychomotor performance"[MeSH] OR "motor skills"[MeSH] OR "intelligence"[MeSH] OR "IQ"[All Fields] OR "executive function"[MeSH] OR "attention"[MeSH] OR "memory"[MeSH] OR "learning"[MeSH] OR "education"[MeSH] OR "reading"[MeSH] OR "mathematics"[MeSH] OR "learning disorders"[MeSH] OR "aptitude tests"[MeSH] OR "language tests"[MeSH] OR "mental health"[MeSH] OR "child behavior"[MeSH] OR "emotional intelligence"[MeSH] OR "emotions"[MeSH] OR "temperament"[MeSH] OR "self concept"[MeSH] OR "self efficacy"[MeSH] OR "mental competency"[MeSH] OR "aggression"[MeSH]) AND ("preterm"[All Fields] OR "low birth weight"[All Fields] OR "maternal height" OR "maternal underweight" OR "malaria" OR "birth spacing" OR "Teen pregnancy" OR "anemia" or "hemoglobin" OR "HIV" OR "iron supplement" OR "iron deficiency" OR "childhood diarrhea" OR "HIV" OR "zinc" OR "iodine" OR "sanitation" OR "clean water" OR "breastfeeding" OR "hookworms" ) AND ("Armenia"[All Fields] OR "Azerbaijan"[All Fields] OR "Georgia"[All Fields] OR "Kazakhstan"[All Fields] OR "Kyrgyzstan"[All Fields] OR "Mongolia"[All Fields] OR "Tajikistan"[All Fields] OR "Turkmenistan"[All Fields] OR "Uzbekistan"[All Fields] OR "Afghanistan"[All Fields] OR "Bangladesh"[All Fields] OR "Bhutan"[All Fields] OR "India"[All Fields] OR "Nepal"[All Fields] OR "Pakistan"[All Fields] OR "Cambodia"[All Fields] OR "Indonesia"[All Fields] OR "Lao People's Democratic Republic"[All Fields] OR "Malaysia"[All Fields] OR "Maldives"[All Fields] OR "Mauritius"[All Fields] OR "Mayotte"[All Fields] OR "Myanmar"[All Fields] OR "Philippines"[All Fields] OR "Seychelles"[All Fields] OR "Sri Lanka"[All Fields] OR "Thailand"[All Fields] OR "Viet Nam"[All Fields] OR "Anguilla"[All Fields] OR "Antigua and Barbuda"[All Fields] OR "Aruba"[All Fields] OR "Bahamas"[All Fields] OR "Barbados"[All Fields] OR "Belize"[All Fields] OR "Bermuda"[All Fields] OR "British Virgin Islands"[All Fields] OR "Cayman Islands"[All Fields] OR "Cuba"[All Fields] OR "Turks and Caicos Islands"[All Fields] OR "Bolivia"[All Fields] OR "Ecuador"[All Fields] OR "Peru"[All Fields] OR "Colombia"[All Fields] OR "Costa Rica"[All Fields] OR "El Salvador"[All Fields] OR "Guatemala"[All Fields] OR "Honduras"[All Fields] OR "Mexico"[All Fields] OR "Nicaragua"[All Fields] OR "Panama"[All Fields] OR "Venezuela"[All Fields] OR "Argentina"[All Fields] OR "Chile"[All Fields] OR "Falkland Islands"[All Fields] OR "Malvinas"[All Fields] OR "Uruguay"[All Fields] OR "Brazil"[All Fields] OR "Paraguay"[All Fields] OR "Algeria"[All Fields] OR "Bahrain"[All Fields] OR "Egypt"[All Fields] OR "Iran"[All Fields] OR "Iraq"[All Fields] OR "Jordan"[All Fields] OR "Kuwait"[All Fields] OR "Lebanon"[All Fields] OR "Libyan Arab Jamahiriya"[All Fields] OR "Morocco"[All Fields] OR "Occupied Palestinian Territory"[All Fields] OR "Oman"[All Fields] OR "Qatar"[All Fields] OR "Saudi Arabia"[All Fields] OR "Syrian Arab Republic"[All Fields] OR "Tunisia"[All Fields] OR "Turkey"[All Fields] OR "United Arab Emirates"[All Fields] OR "Western Sahara"[All Fields] OR "Yemen"[All Fields] OR "American Samoa"[All Fields] OR "Cook Islands"[All Fields] OR "Fiji"[All Fields] OR "French Polynesia"[All Fields] OR "Guam"[All Fields] OR "Kiribati"[All Fields] OR "Marshall Islands"[All Fields] OR "Micronesia"[All Fields] OR "Nauru"[All Fields] OR "New Caledonia"[All Fields] OR "Niue"[All Fields] OR "Northern Mariana Islands"[All Fields] OR "Palau"[All Fields] OR "Papua New Guinea"[All Fields] OR "Pitcairn"[All Fields] OR "Samoa"[All Fields] OR "Solomon Islands"[All Fields] OR "Tokelau"[All Fields] OR "Tonga"[All Fields] OR "Tuvalu"[All Fields] OR "Vanuatu"[All Fields] OR "Wallis and Futuna Islands"[All Fields] OR "Angola"[All Fields] OR "Central African Republic"[All Fields] OR

1  
2  
3 "Congo"[All Fields] OR "Democratic Republic of the Congo"[All Fields] OR "Equatorial  
4 Guinea"[All Fields] OR "Gabon"[All Fields] OR "Burundi"[All Fields] OR "Comoros"[All  
5 Fields] OR "Djibouti"[All Fields] OR "Eritrea"[All Fields] OR "Ethiopia"[All Fields] OR  
6 "Kenya"[All Fields] OR "Madagascar"[All Fields] OR "Malawi"[All Fields] OR  
7 "Mozambique"[All Fields] OR "Rwanda"[All Fields] OR "Somalia"[All Fields] OR "Sudan"[All  
8 Fields] OR "Uganda"[All Fields] OR "United Republic of Tanzania"[All Fields] OR  
9 "Zambia"[All Fields] OR "Botswana"[All Fields] OR "Lesotho"[All Fields] OR "Namibia"[All  
10 Fields] OR "South Africa"[All Fields] OR "Swaziland"[All Fields] OR "Zimbabwe"[All Fields]  
11 OR "Benin"[All Fields] OR "Burkina Faso"[All Fields] OR "Cameroon"[All Fields] OR "Cape  
12 Verde"[All Fields] OR "Chad"[All Fields] OR "Cote d'Ivoire"[All Fields] OR "Gambia"[All  
13 Fields] OR "Ghana"[All Fields] OR "Guinea"[All Fields] OR "Guinea-Bissau"[All Fields] OR  
14 "Liberia"[All Fields] OR "Mali"[All Fields] OR "Mauritania"[All Fields] OR "Niger"[All Fields]  
15 OR "Nigeria"[All Fields] OR "Saint Helena"[All Fields] OR "Sao Tome and Principe"[All  
16 Fields] OR "Senegal"[All Fields] OR "Sierra Leone"[All Fields] OR "Togo"[All Fields]  
17  
18  
19  
20  
21  
22  
23  
24  
25  
26  
27  
28  
29  
30  
31  
32  
33  
34  
35  
36  
37  
38  
39  
40  
41  
42  
43  
44  
45  
46  
47  
48  
49  
50  
51  
52  
53  
54  
55  
56  
57  
58  
59  
60

## Appendix 2: Forest plots

|                                                                                                                                |    |
|--------------------------------------------------------------------------------------------------------------------------------|----|
| Figure 1: Association between low birth weight (LBW) and (reference: normal birth weight) and cognitive development. ....      | 7  |
| Figure 2: Association between Moderately low birth Weight (reference, normal birth weight) and cognitive development. ....     | 8  |
| Figure 3: Association between very low Birth weight (reference: normal birth weight)) and cognitive development. ....          | 9  |
| Figure 4: Association between child mild anemia (reference: no anemia) and cognitive development. ...                          | 10 |
| Figure 5: Association between child moderate anemia (reference: no anemia) and cognitive development. ....                     | 11 |
| Figure 6: Association between lack of access to clean water (reference: access to clean water) and cognitive development. .... | 12 |
| Figure 7: Association between lack of access to sanitation (reference: access to sanitation) and cognitive development. ....   | 13 |
| Figure 8: Association between preterm-AGA (reference: term-AGA) and cognitive development. ....                                | 14 |
| Figure 9: Association between term-SGA (reference: term-AGA) and cognitive development. ....                                   | 15 |
| Figure 10: Association between preterm- SGA (reference: term-AGA) and cognitive development. ....                              | 16 |
| Figure 11: Association between late preterm birth, 34-37 weeks (reference: term) and cognitive development. ....               | 17 |
| Figure 12: Association between early preterm birth, < 34 weeks (reference: term) and cognitive development. ....               | 18 |
| Figure 13: Association between moderate SGA (reference: AGA) and cognitive development. ....                                   | 19 |
| Figure 14: Association between severe SGA (reference: AGA) and cognitive development. ....                                     | 20 |
| Figure 15: Association between low birth weight (reference: normal birth weight) and motor development. ....                   | 21 |
| Figure 16: Association between moderately low birth weight (reference: normal birth weight) and motor development. ....        | 22 |
| Figure 17: Association between very low birth weight (reference: normal birth weight) and motor development. ....              | 23 |
| Figure 18: Association between child mild anemia (reference: no anemia) and motor development. ....                            | 24 |
| Figure 19: Association between child moderate anemia (reference: no anemia) and motor development. ....                        | 25 |
| Figure 20: Association between lack of access to clean water (reference: access to clean water) and motor development. ....    | 26 |
| Figure 21: Association between lack of access to sanitation (reference: access to sanitation) and motor development. ....      | 27 |
| Figure 22: Association between preterm-AGA (reference: term-AGA) and motor development. ....                                   | 28 |
| Figure 23: Association between term-SGA (reference: term-AGA) and motor development. ....                                      | 29 |
| Figure 24: Association between preterm-SGA (reference: term-AGA) and motor development. ....                                   | 30 |
| Figure 25: Association between late preterm birth, 34-37 weeks (reference: term) and motor development. ....                   | 31 |

|    |                                                                                                       |    |
|----|-------------------------------------------------------------------------------------------------------|----|
| 1  |                                                                                                       |    |
| 2  |                                                                                                       |    |
| 3  | Figure 26: Association between early preterm birth, < 34 weeks (reference: term) and motor            |    |
| 4  | development.....                                                                                      | 32 |
| 5  | Figure 27: Association between moderate SGA (reference: AGA) and motor development.....               | 33 |
| 6  | Figure 28: Association between severe SGA (reference: AGA) and motor development.....                 | 34 |
| 7  | Figure 29: Association between low birth weight (LBW) and (reference: normal birth weight) and        |    |
| 8  | language development. ....                                                                            | 35 |
| 9  | Figure 30: Association between moderately low birth weight and (reference: normal birth weight) and   |    |
| 10 | language development. ....                                                                            | 36 |
| 11 | Figure 31: Association between very low birth weight and (reference: normal birth weight) and         |    |
| 12 | language development. ....                                                                            | 37 |
| 13 | Figure 32: Association between lack of access to clean water (reference: access to clean water) and   |    |
| 14 | language development. ....                                                                            | 38 |
| 15 | Figure 33: Association between lack of access to sanitation (reference: access to sanitation) and     |    |
| 16 | language development. ....                                                                            | 39 |
| 17 | Figure 34: Association between preterm-AGA (reference: term-AGA) and language development.....        | 40 |
| 18 | Figure 35: Association between term-SGA (reference: term-AGA) and language development.....           | 41 |
| 19 | Figure 36: Association between late preterm birth, 34-37 weeks (reference: term) and language         |    |
| 20 | development.....                                                                                      | 42 |
| 21 | Figure 37: Association between early preterm birth, < 34 weeks (reference: term) and language         |    |
| 22 | development.....                                                                                      | 43 |
| 23 | Figure 38: Association between moderate SGA (reference: AGA) and language development. ....           | 44 |
| 24 | Figure 39: Association between severe SGA (reference: AGA) and language development. ....             | 45 |
| 25 | Figure 40: Association between no maternal education (reference: primary education) and cognitive     |    |
| 26 | development.....                                                                                      | 46 |
| 27 | Figure 41: Association between maternal secondary education (reference: primary education) and        |    |
| 28 | cognitive development. ....                                                                           | 47 |
| 29 | Figure 42: Association between maternal higher education (reference: primary education) and cognitive |    |
| 30 | development.....                                                                                      | 48 |
| 31 | Figure 43: Association between no paternal education (reference: primary education) and cognitive     |    |
| 32 | development.....                                                                                      | 49 |
| 33 | Figure 44: Association between paternal secondary education (reference: primary education) and        |    |
| 34 | cognitive development. ....                                                                           | 50 |
| 35 | Figure 45: Association between paternal higher education (reference: primary education) and cognitive |    |
| 36 | development.....                                                                                      | 51 |
| 37 | Figure 46: Association between maternal ages < 15 (reference: ages 20-34) and cognitive development.  |    |
| 38 | .....                                                                                                 | 52 |
| 39 | Figure 47: Association between maternal ages 15-20 (reference: ages 20-34) and cognitive              |    |
| 40 | development.....                                                                                      | 53 |
| 41 | Figure 48: Association between maternal ages >35 (reference: ages 20-34) and cognitive development.   |    |
| 42 | .....                                                                                                 | 54 |
| 43 | Figure 49: Association between maternal height < 145cm (reference: >155 cm) and cognitive             |    |
| 44 | development.....                                                                                      | 55 |
| 45 |                                                                                                       |    |
| 46 |                                                                                                       |    |
| 47 |                                                                                                       |    |
| 48 |                                                                                                       |    |
| 49 |                                                                                                       |    |
| 50 |                                                                                                       |    |
| 51 |                                                                                                       |    |
| 52 |                                                                                                       |    |
| 53 |                                                                                                       |    |
| 54 |                                                                                                       |    |
| 55 |                                                                                                       |    |
| 56 |                                                                                                       |    |
| 57 |                                                                                                       |    |
| 58 |                                                                                                       |    |
| 59 |                                                                                                       |    |
| 60 |                                                                                                       |    |

|    |                                                                                                                 |
|----|-----------------------------------------------------------------------------------------------------------------|
| 1  |                                                                                                                 |
| 2  |                                                                                                                 |
| 3  | Figure 50: Association between maternal height 145-150cm (reference: >155 cm) and cognitive                     |
| 4  | development..... 56                                                                                             |
| 5  | Figure 51: Association between maternal height 150-155 cm (reference: >155 cm) and cognitive                    |
| 6  | development..... 57                                                                                             |
| 7  | Figure 52: Association between maternal BMI <18.5 kg/m <sup>2</sup> (reference: 18.5-25) and cognitive          |
| 8  | development..... 58                                                                                             |
| 9  | Figure 53: Association between maternal BMI 25-30 kg/m <sup>2</sup> (reference: 18.5-25) and cognitive          |
| 10 | development..... 59                                                                                             |
| 11 | Figure 54: Association between maternal BMI >30 kg/m <sup>2</sup> (reference: 18.5-25) and cognitive            |
| 12 | development..... 60                                                                                             |
| 13 | Figure 55: Association between mild anemia in pregnancy (reference: no anemia) and cognitive                    |
| 14 | development..... 61                                                                                             |
| 15 | Figure 56: Association between maternal moderate anemia (reference: no anemia) and cognitive                    |
| 16 | development..... 62                                                                                             |
| 17 | Figure 57: Association between no maternal education (reference: primary education) and motor                   |
| 18 | development..... 63                                                                                             |
| 19 | Figure 58: Association between maternal secondary education (reference: primary education) and                  |
| 20 | motor development..... 64                                                                                       |
| 21 | Figure 59: Association between maternal higher education (reference: primary education) and motor               |
| 22 | development..... 65                                                                                             |
| 23 | Figure 60: Association between no paternal education (reference: primary education) and motor                   |
| 24 | development..... 66                                                                                             |
| 25 | Figure 61: Association between paternal secondary education (reference: primary education) and motor            |
| 26 | development..... 67                                                                                             |
| 27 | Figure 62: Association between paternal higher education (reference: primary education) and motor               |
| 28 | development..... 68                                                                                             |
| 29 | Figure 63: Association between maternal ages < 15 (reference: ages 20-34) and motor development. ... 69         |
| 30 | Figure 64: Association between maternal ages 15-20 (reference: ages 20-34) and motor development. 70            |
| 31 | Figure 65: Association between maternal ages >35 (reference: ages 20-34) and motor development. ... 71          |
| 32 | Figure 66: Association between maternal height <145 (reference: >155 cm) and motor development... 72            |
| 33 | Figure 67: Association between maternal height 145-150 (reference: >155 cm) and motor development.              |
| 34 | ..... 73                                                                                                        |
| 35 | Figure 68: Association between maternal height 150-155 (reference: >155 cm) and motor development.              |
| 36 | ..... 74                                                                                                        |
| 37 | Figure 69: Association between maternal BMI <18.5 kg/m <sup>2</sup> (reference: 18.5-25) and motor development. |
| 38 | ..... 75                                                                                                        |
| 39 | Figure 70: Association between maternal BMI <25-30 kg/m <sup>2</sup> (reference: 18.5-25) and motor             |
| 40 | development..... 76                                                                                             |
| 41 | Figure 71: Association between maternal BMI >30 kg/m <sup>2</sup> (reference: 18.5-25) and motor development.   |
| 42 | ..... 77                                                                                                        |
| 43 | Figure 72: Association between maternal mild anemia (reference: no anemia) and motor development                |
| 44 | ..... 78                                                                                                        |
| 45 |                                                                                                                 |
| 46 |                                                                                                                 |
| 47 |                                                                                                                 |
| 48 |                                                                                                                 |
| 49 |                                                                                                                 |
| 50 |                                                                                                                 |
| 51 |                                                                                                                 |
| 52 |                                                                                                                 |
| 53 |                                                                                                                 |
| 54 |                                                                                                                 |
| 55 |                                                                                                                 |
| 56 |                                                                                                                 |
| 57 |                                                                                                                 |
| 58 |                                                                                                                 |
| 59 |                                                                                                                 |
| 60 |                                                                                                                 |

|    |                                                                                                       |    |
|----|-------------------------------------------------------------------------------------------------------|----|
| 1  |                                                                                                       |    |
| 2  |                                                                                                       |    |
| 3  | Figure 73: Association between maternal moderate anemia (reference: no anemia) and motor              |    |
| 4  | development.....                                                                                      | 79 |
| 5  | Figure 74: Association between no maternal education (reference: primary education) and language      |    |
| 6  | development.....                                                                                      | 80 |
| 7  | Figure 75: Association between maternal secondary education (reference: primary education) and        |    |
| 8  | language development. ....                                                                            | 81 |
| 9  | Figure 76: Association between maternal higher education (reference: primary education) and language  |    |
| 10 | development.....                                                                                      | 82 |
| 11 | Figure 77: Association between no paternal education (reference: primary education) and language      |    |
| 12 | development.....                                                                                      | 83 |
| 13 | Figure 78: Association between paternal secondary education (reference: primary education) and        |    |
| 14 | language development. ....                                                                            | 84 |
| 15 | Figure 79: Association between paternal higher education (reference: primary education) and language  |    |
| 16 | development.....                                                                                      | 85 |
| 17 | Figure 80: Association between maternal ages 15-20 (reference: ages 20-34) and language development.  |    |
| 18 | .....                                                                                                 | 86 |
| 19 | Figure 81: Association between maternal ages >35 (reference: ages 20-34) and language development.    |    |
| 20 | .....                                                                                                 | 87 |
| 21 | Figure 82: Association between maternal height <145 cm (reference: >155 cm) and language              |    |
| 22 | development.....                                                                                      | 88 |
| 23 | Figure 83: Association between maternal height 145-150cm (reference: >155 cm) and language            |    |
| 24 | development.....                                                                                      | 89 |
| 25 | Figure 84: Association between maternal height 150-155 cm (reference: >155 cm) and language           |    |
| 26 | development.....                                                                                      | 90 |
| 27 | Figure 85: Association between maternal BMI 25-30 kg/m <sup>2</sup> (reference: 18.5-25) and language |    |
| 28 | development.....                                                                                      | 91 |
| 29 | Figure 86: Association between maternal BMI >30 kg/m <sup>2</sup> (reference: 18.5-25) and language   |    |
| 30 | development.....                                                                                      | 92 |
| 31 |                                                                                                       |    |
| 32 |                                                                                                       |    |
| 33 |                                                                                                       |    |
| 34 |                                                                                                       |    |
| 35 |                                                                                                       |    |
| 36 |                                                                                                       |    |
| 37 |                                                                                                       |    |
| 38 |                                                                                                       |    |
| 39 |                                                                                                       |    |
| 40 |                                                                                                       |    |
| 41 |                                                                                                       |    |
| 42 |                                                                                                       |    |
| 43 |                                                                                                       |    |
| 44 |                                                                                                       |    |
| 45 |                                                                                                       |    |
| 46 |                                                                                                       |    |
| 47 |                                                                                                       |    |
| 48 |                                                                                                       |    |
| 49 |                                                                                                       |    |
| 50 |                                                                                                       |    |
| 51 |                                                                                                       |    |
| 52 |                                                                                                       |    |
| 53 |                                                                                                       |    |
| 54 |                                                                                                       |    |
| 55 |                                                                                                       |    |
| 56 |                                                                                                       |    |
| 57 |                                                                                                       |    |
| 58 |                                                                                                       |    |
| 59 |                                                                                                       |    |
| 60 |                                                                                                       |    |

1. **Child Risk Factors on Child's Cognitive Development**



Figure 1: Association between low birth weight (LBW) and (reference: normal birth weight) and cognitive development.



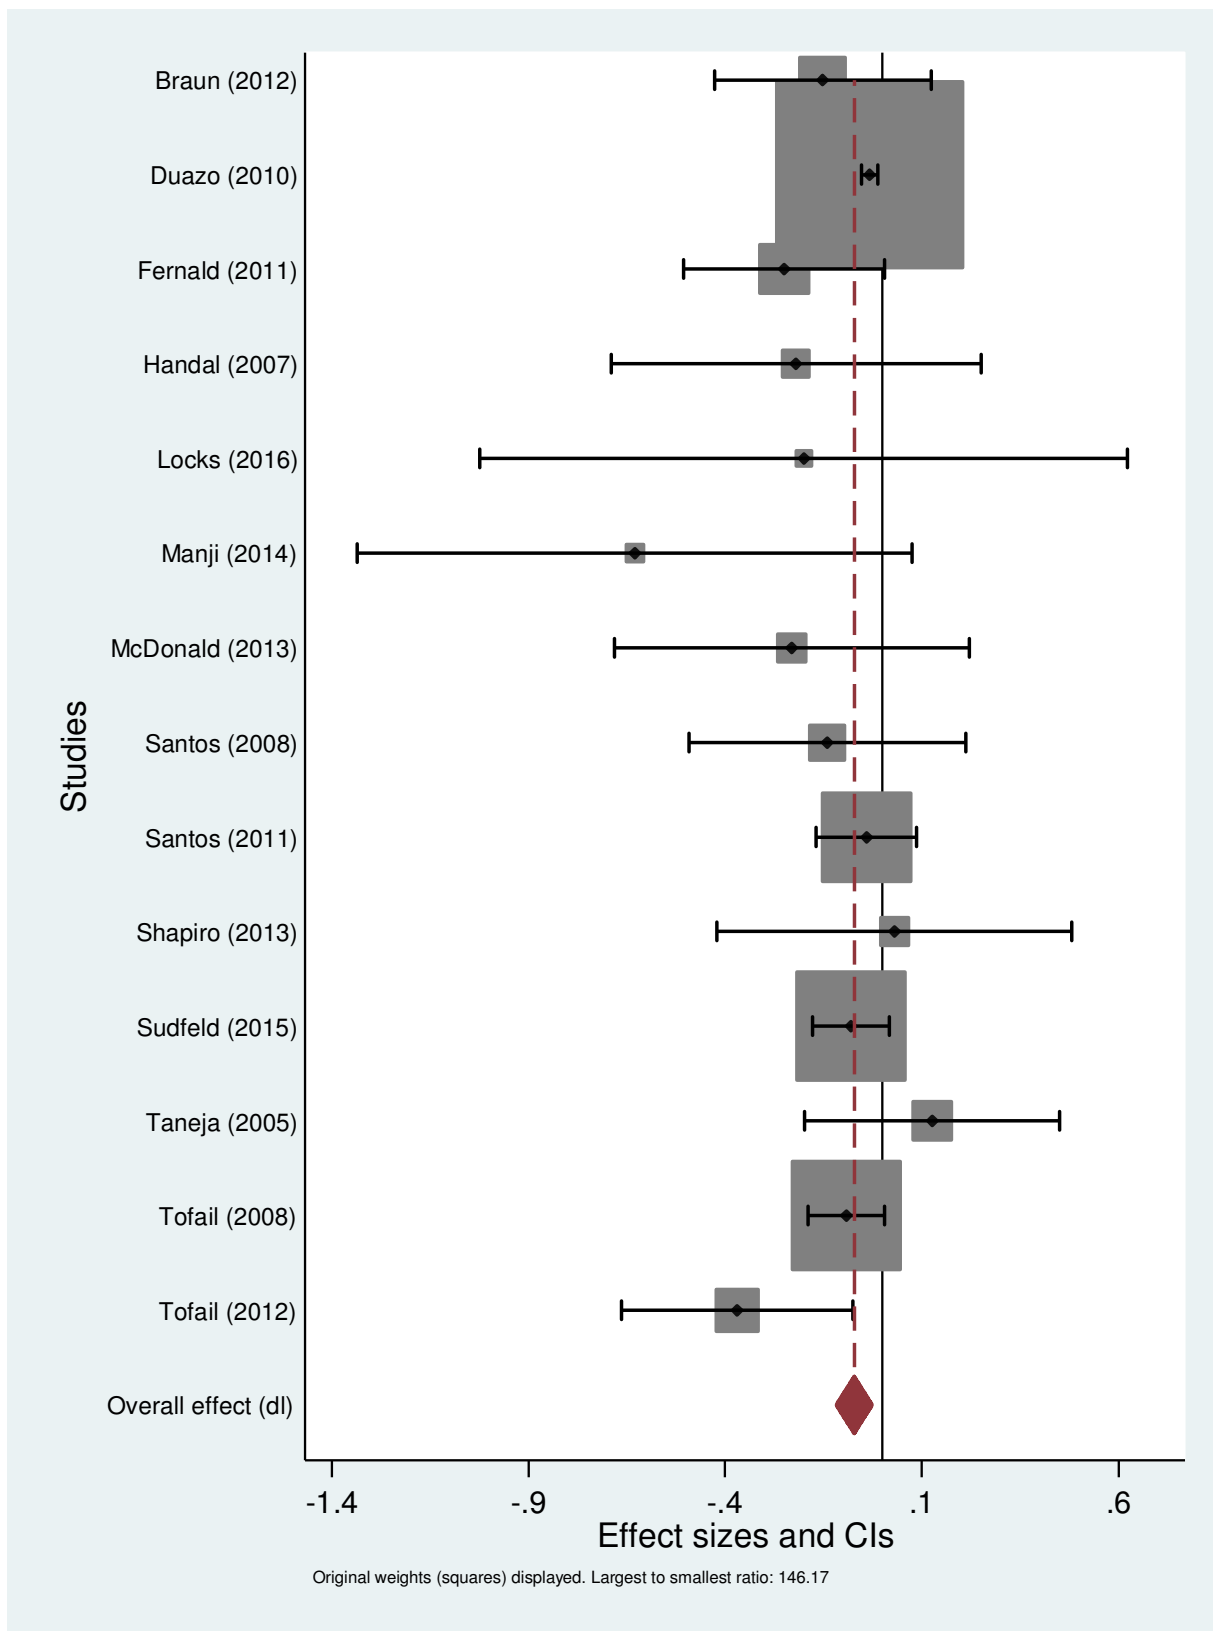

Figure 2: Association between Moderately low birth Weight (reference, normal birth weight) and cognitive development.

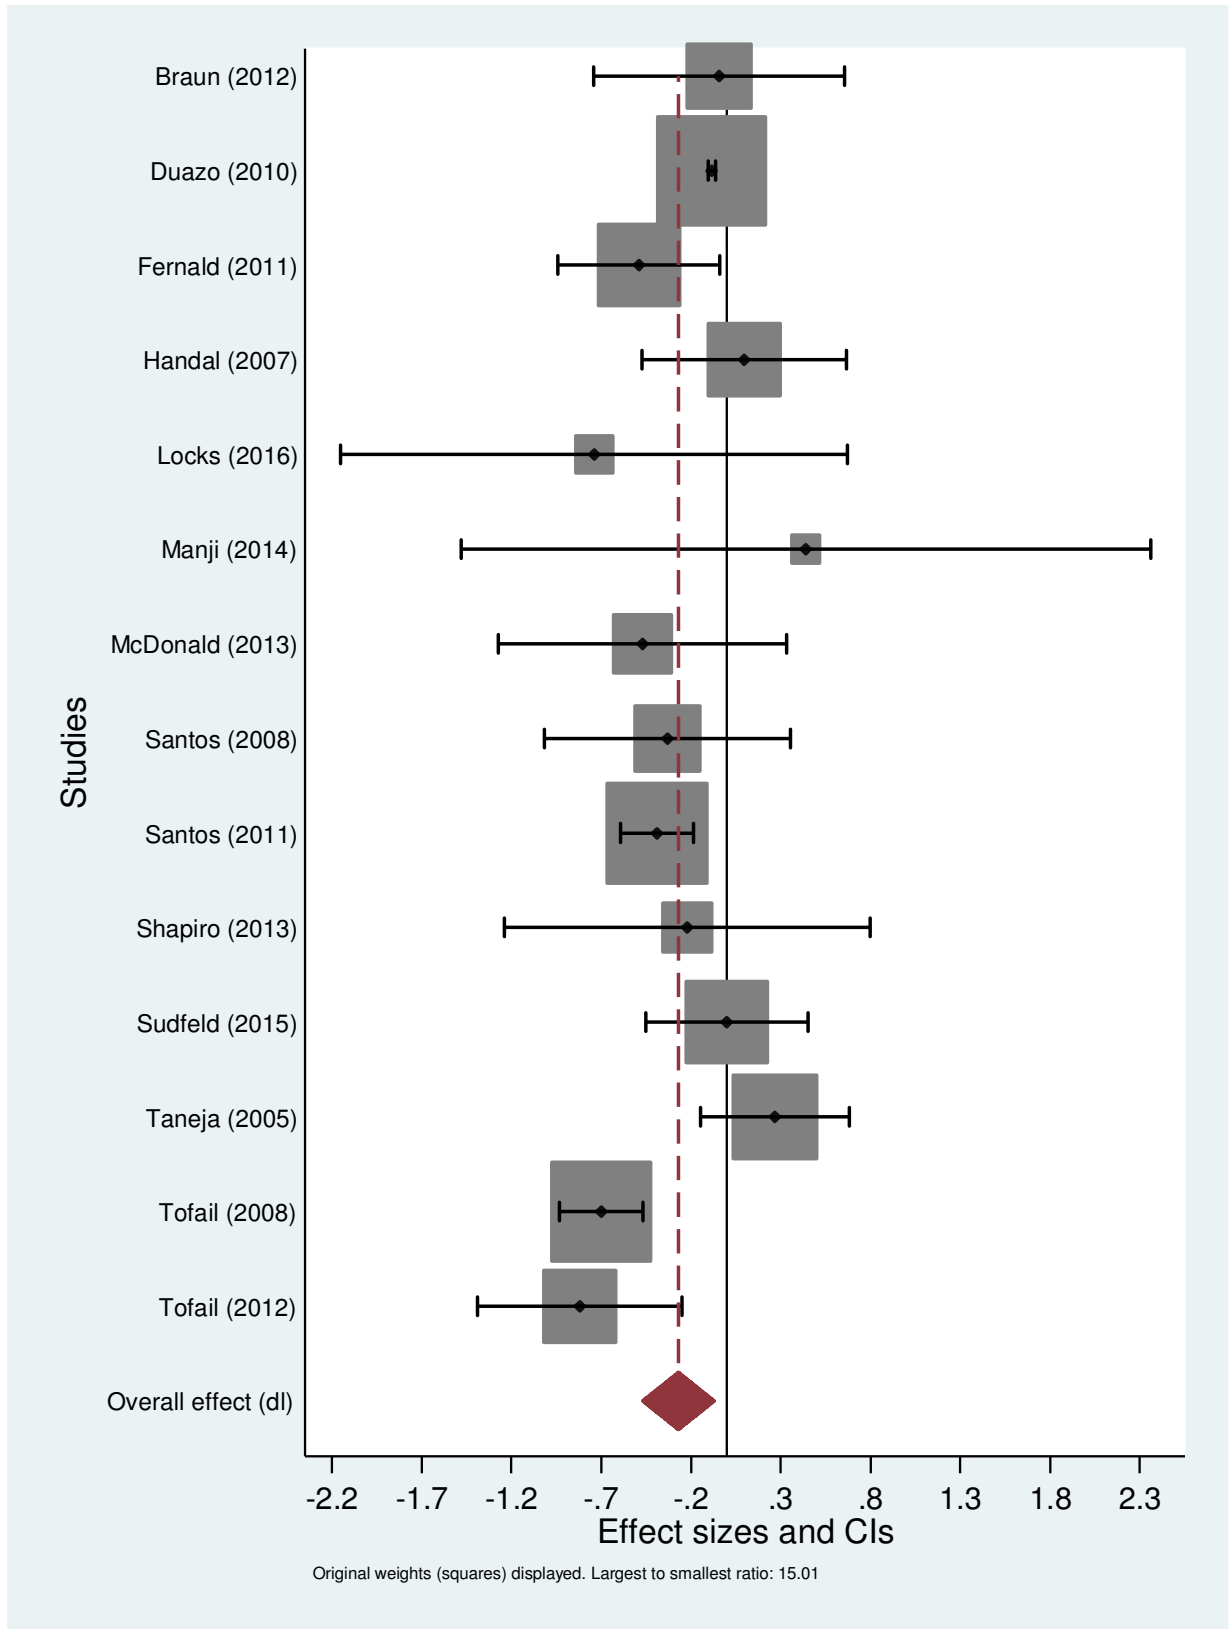

Figure 3: Association between very low Birth weight (reference: normal birth weight) and cognitive development.

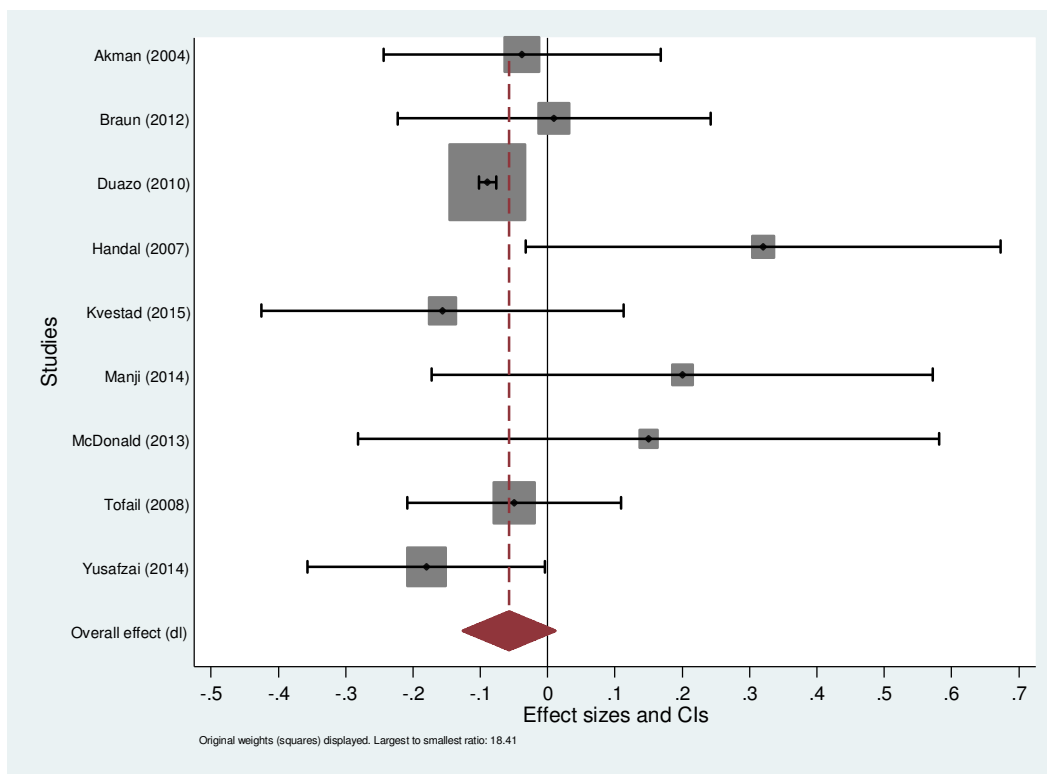

**Figure 4: Association between child mild anemia (reference: no anemia) and cognitive development.**

1  
2  
3  
4  
5  
6  
7  
8  
9  
10  
11  
12  
13  
14  
15  
16  
17  
18  
19  
20  
21  
22  
23  
24  
25  
26  
27  
28  
29  
30  
31  
32  
33  
34  
35  
36  
37  
38  
39  
40  
41  
42  
43  
44  
45  
46  
47  
48  
49  
50  
51  
52  
53  
54  
55  
56  
57  
58  
59  
60

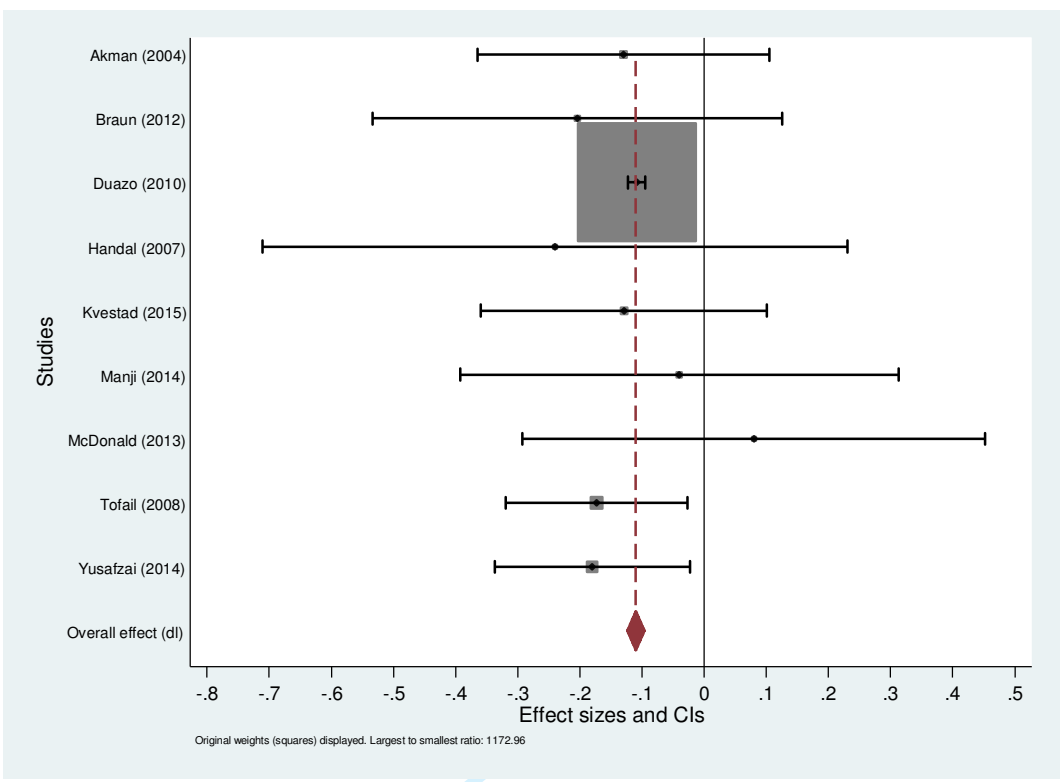

**Figure 5: Association between child moderate anemia (reference: no anemia) and cognitive development.**

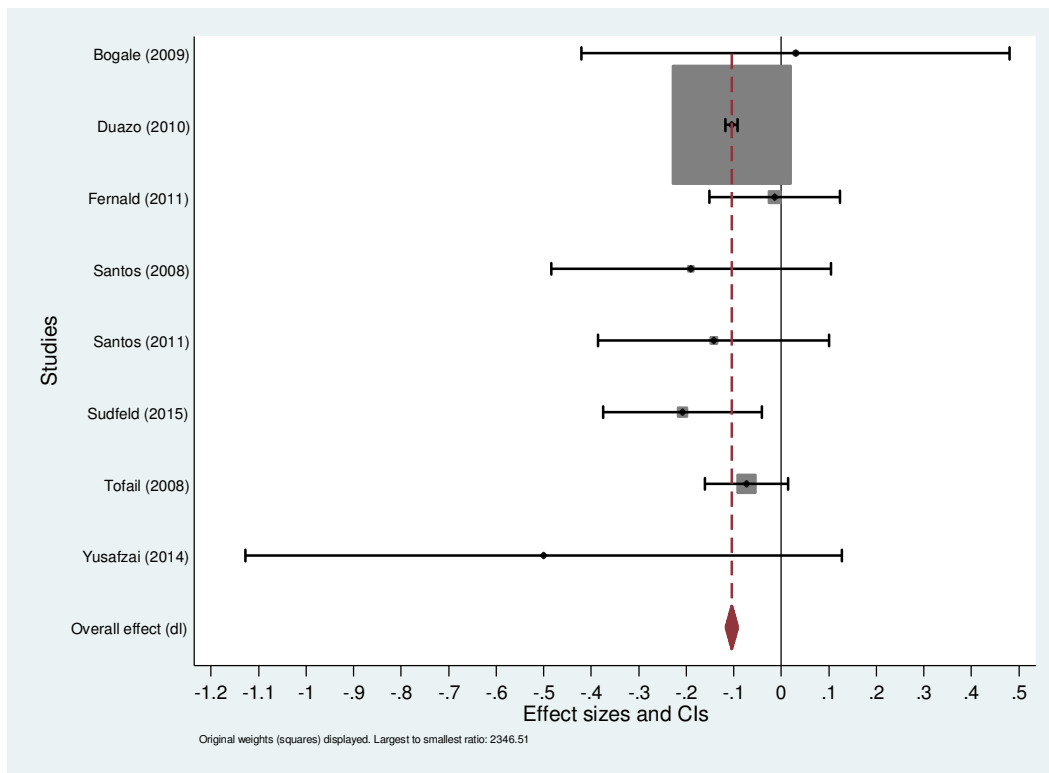

**Figure 6: Association between lack of access to clean water (reference: access to clean water) and cognitive development.**

Review only

1  
2  
3  
4  
5  
6  
7  
8  
9  
10  
11  
12  
13  
14  
15  
16  
17  
18  
19  
20  
21  
22  
23  
24  
25  
26  
27  
28  
29  
30  
31  
32  
33  
34  
35  
36  
37  
38  
39  
40  
41  
42  
43  
44  
45  
46  
47  
48  
49  
50  
51  
52  
53  
54  
55  
56  
57  
58  
59  
60

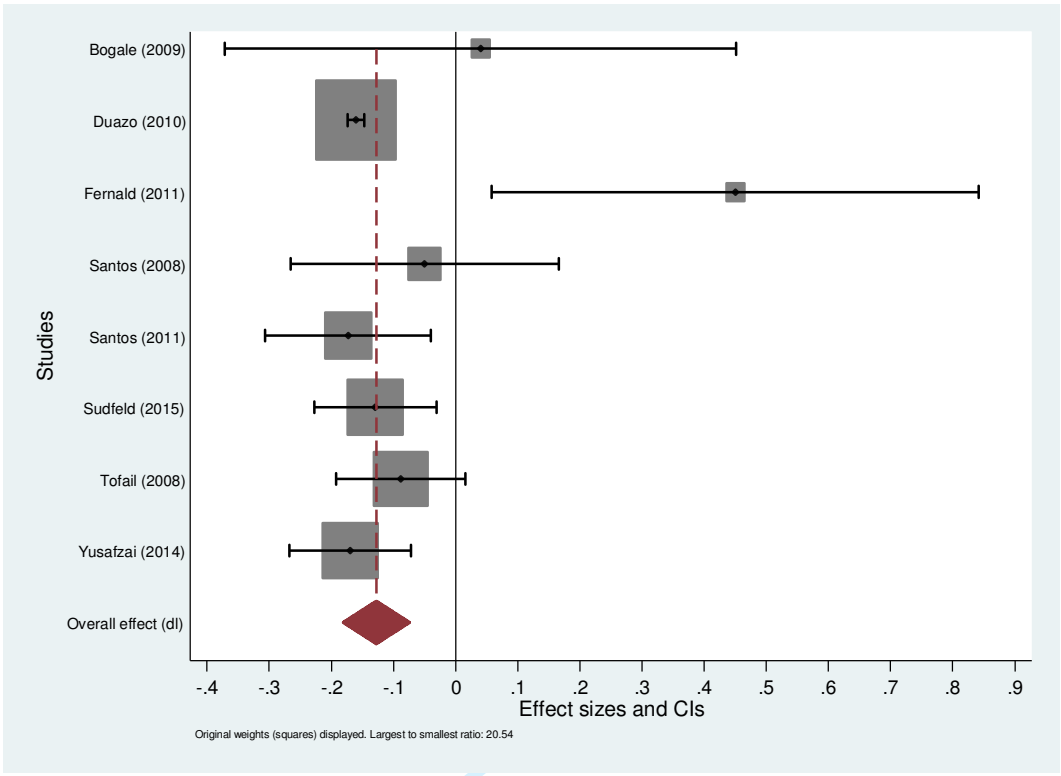

Figure 7: Association between lack of access to sanitation (reference: access to sanitation) and cognitive development.

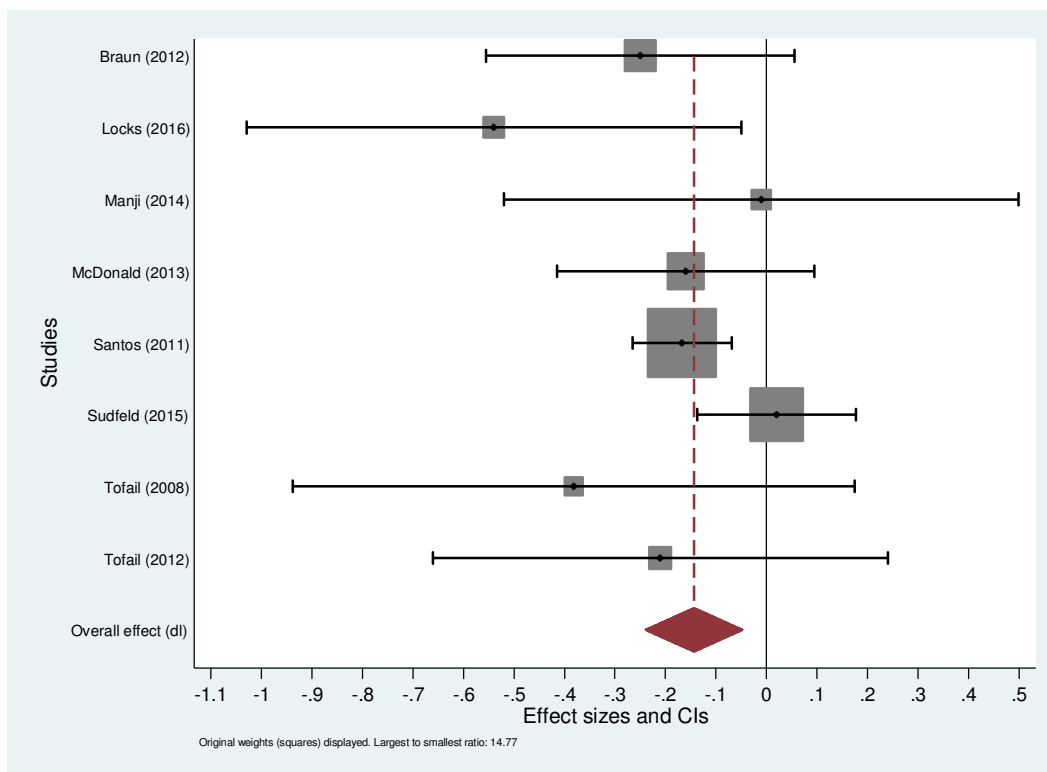

**Figure 8: Association between preterm-AGA (reference: term-AGA) and cognitive development.**

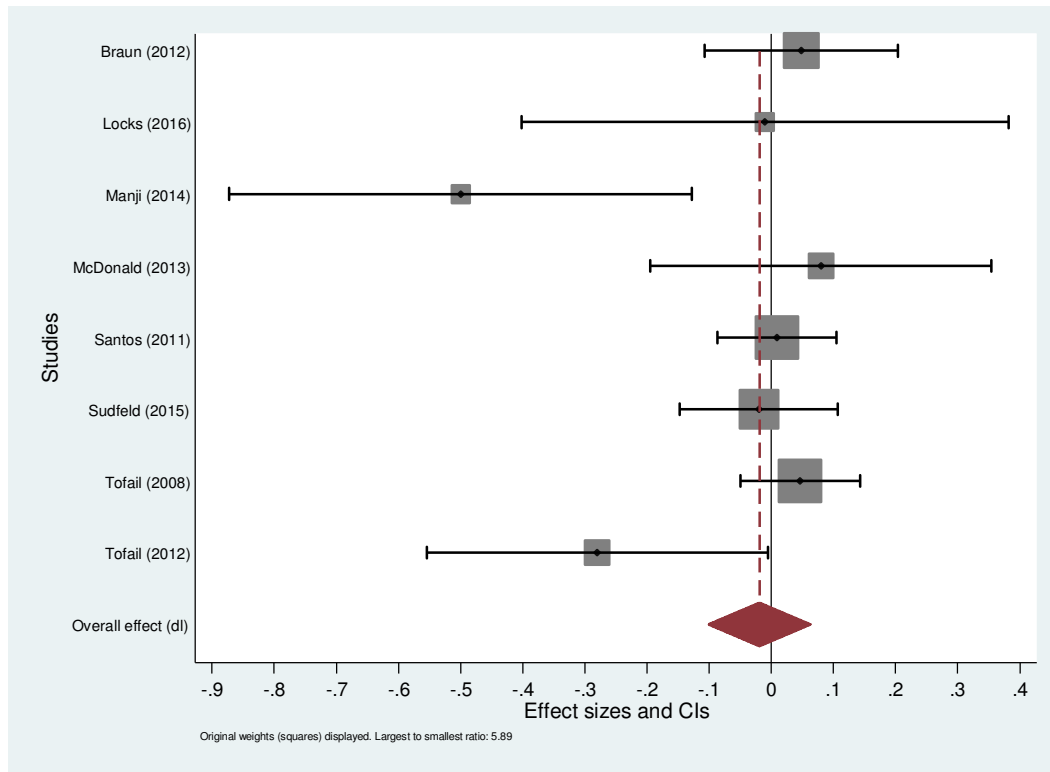

**Figure 9: Association between term-SGA (reference: term-AGA) and cognitive development.**



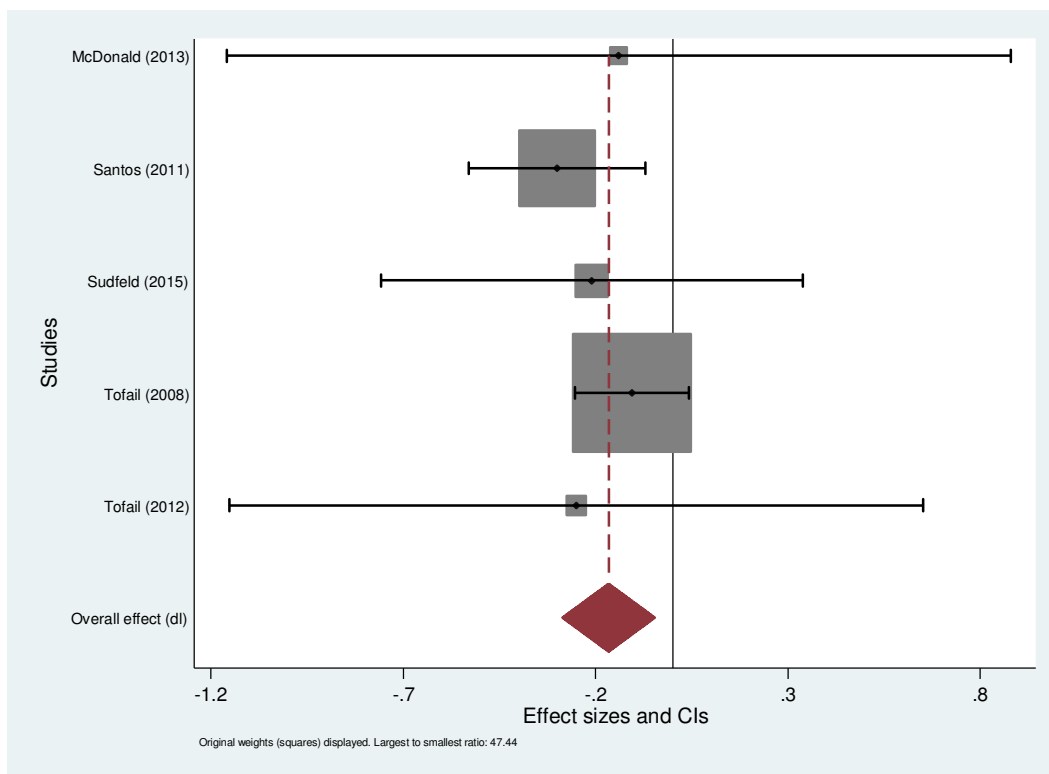

**Figure 10: Association between preterm- SGA (reference: term-AGA) and cognitive development.**

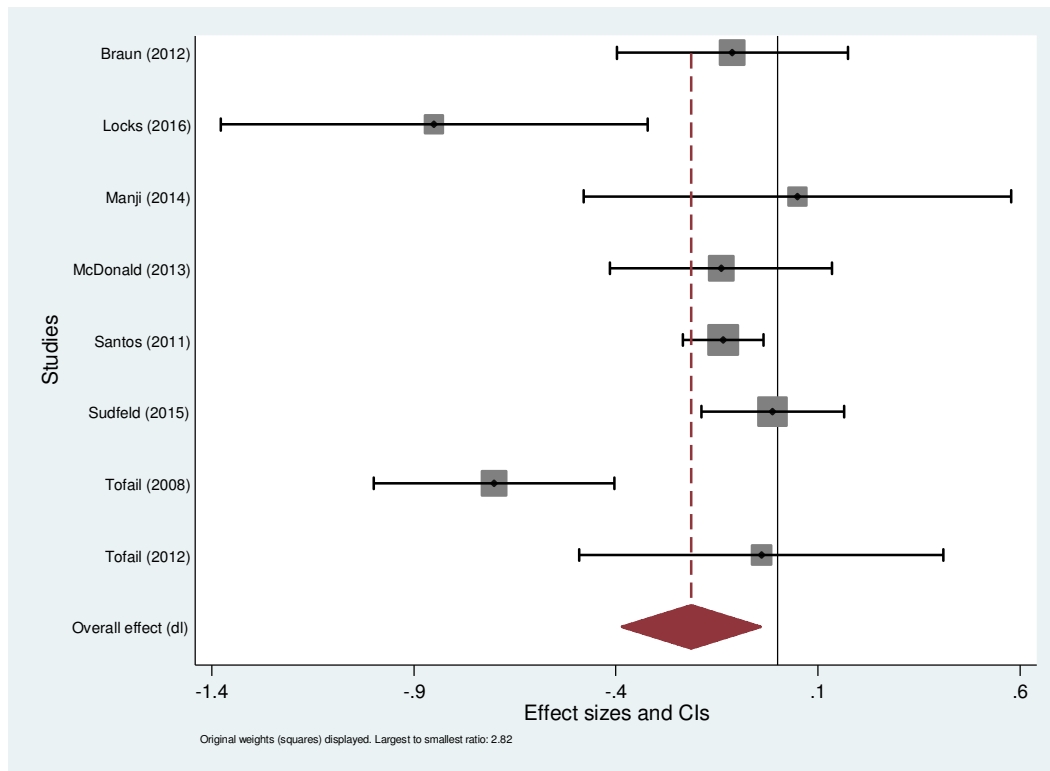

Figure 11: Association between late preterm birth, 34-37 weeks (reference: term) and cognitive development.

Review only

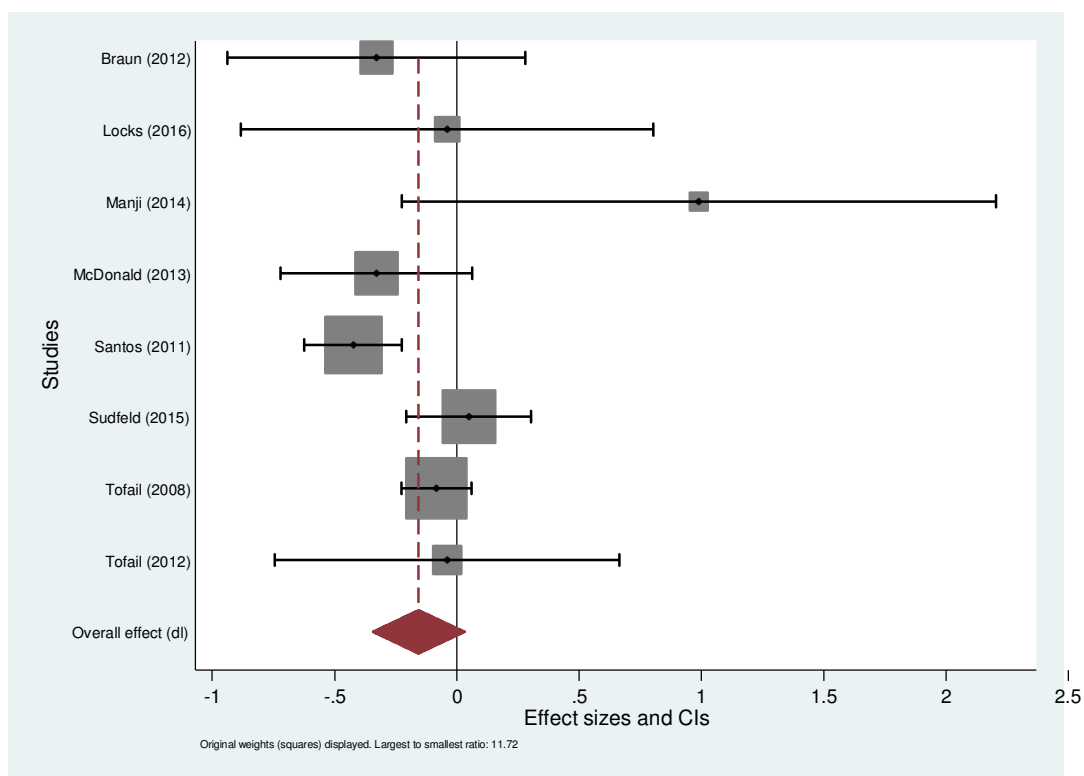

Figure 12: Association between early preterm birth, < 34 weeks (reference: term) and cognitive development.

1  
2  
3  
4  
5  
6  
7  
8  
9  
10  
11  
12  
13  
14  
15  
16  
17  
18  
19  
20  
21  
22  
23  
24  
25  
26  
27  
28  
29  
30  
31  
32  
33  
34  
35  
36  
37  
38  
39  
40  
41  
42  
43  
44  
45  
46  
47  
48  
49  
50  
51  
52  
53  
54  
55  
56  
57  
58  
59  
60

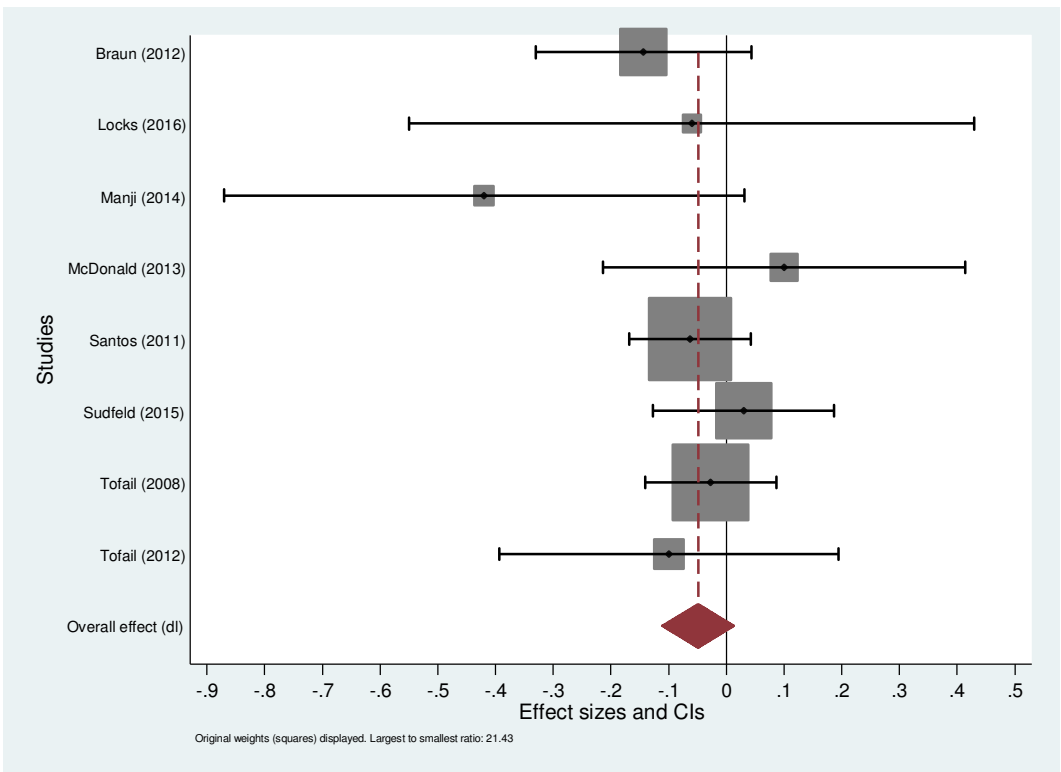

Figure 13: Association between moderate SGA (reference: AGA) and cognitive development.

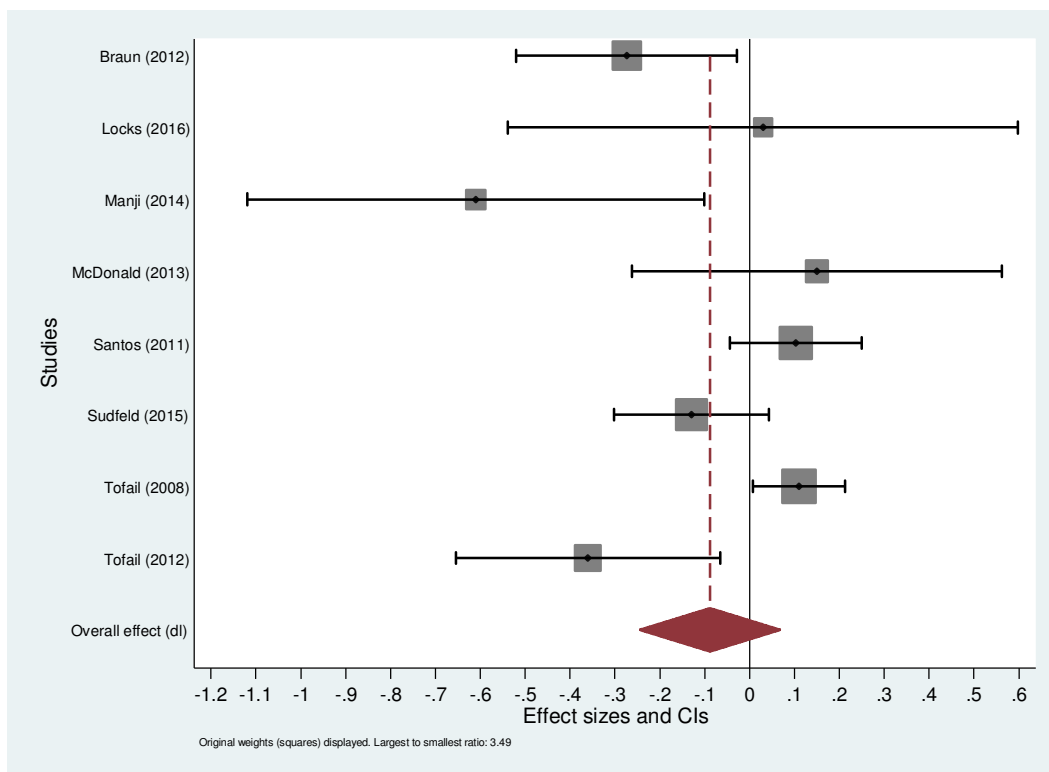

**Figure 14: Association between severe SGA (reference: AGA) and cognitive development.**

2. **Child Risk Factors on Child’s Motor Development**

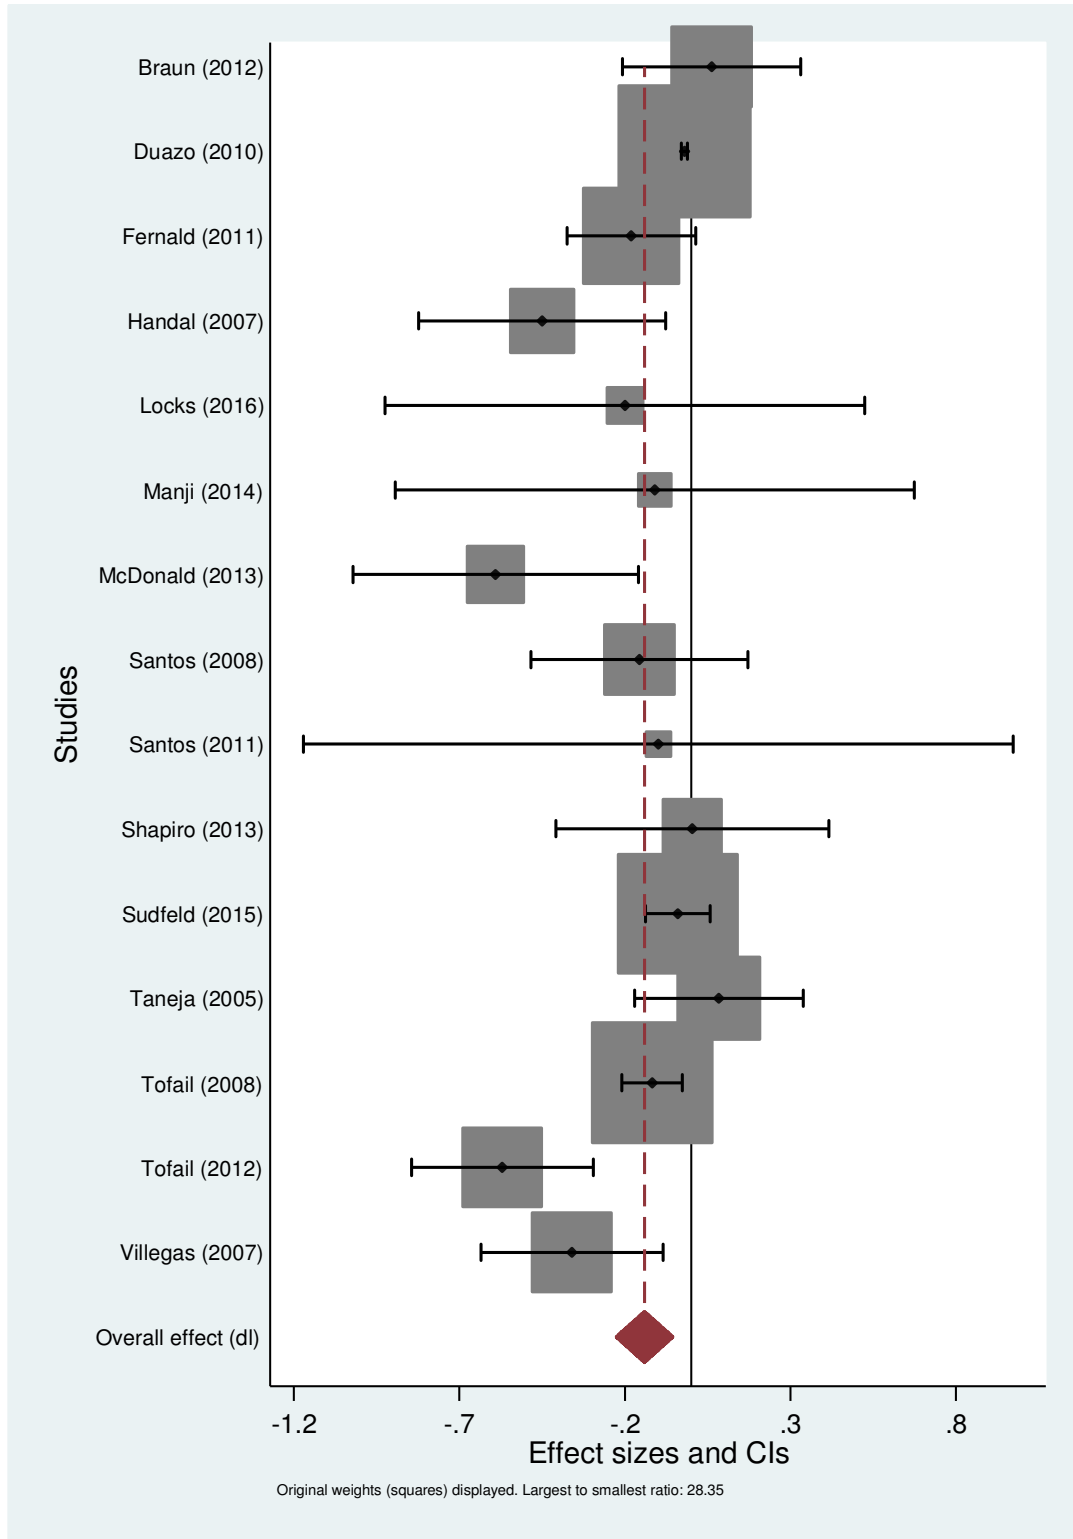

Figure 15: Association between low birth weight (reference: normal birth weight) and motor development.

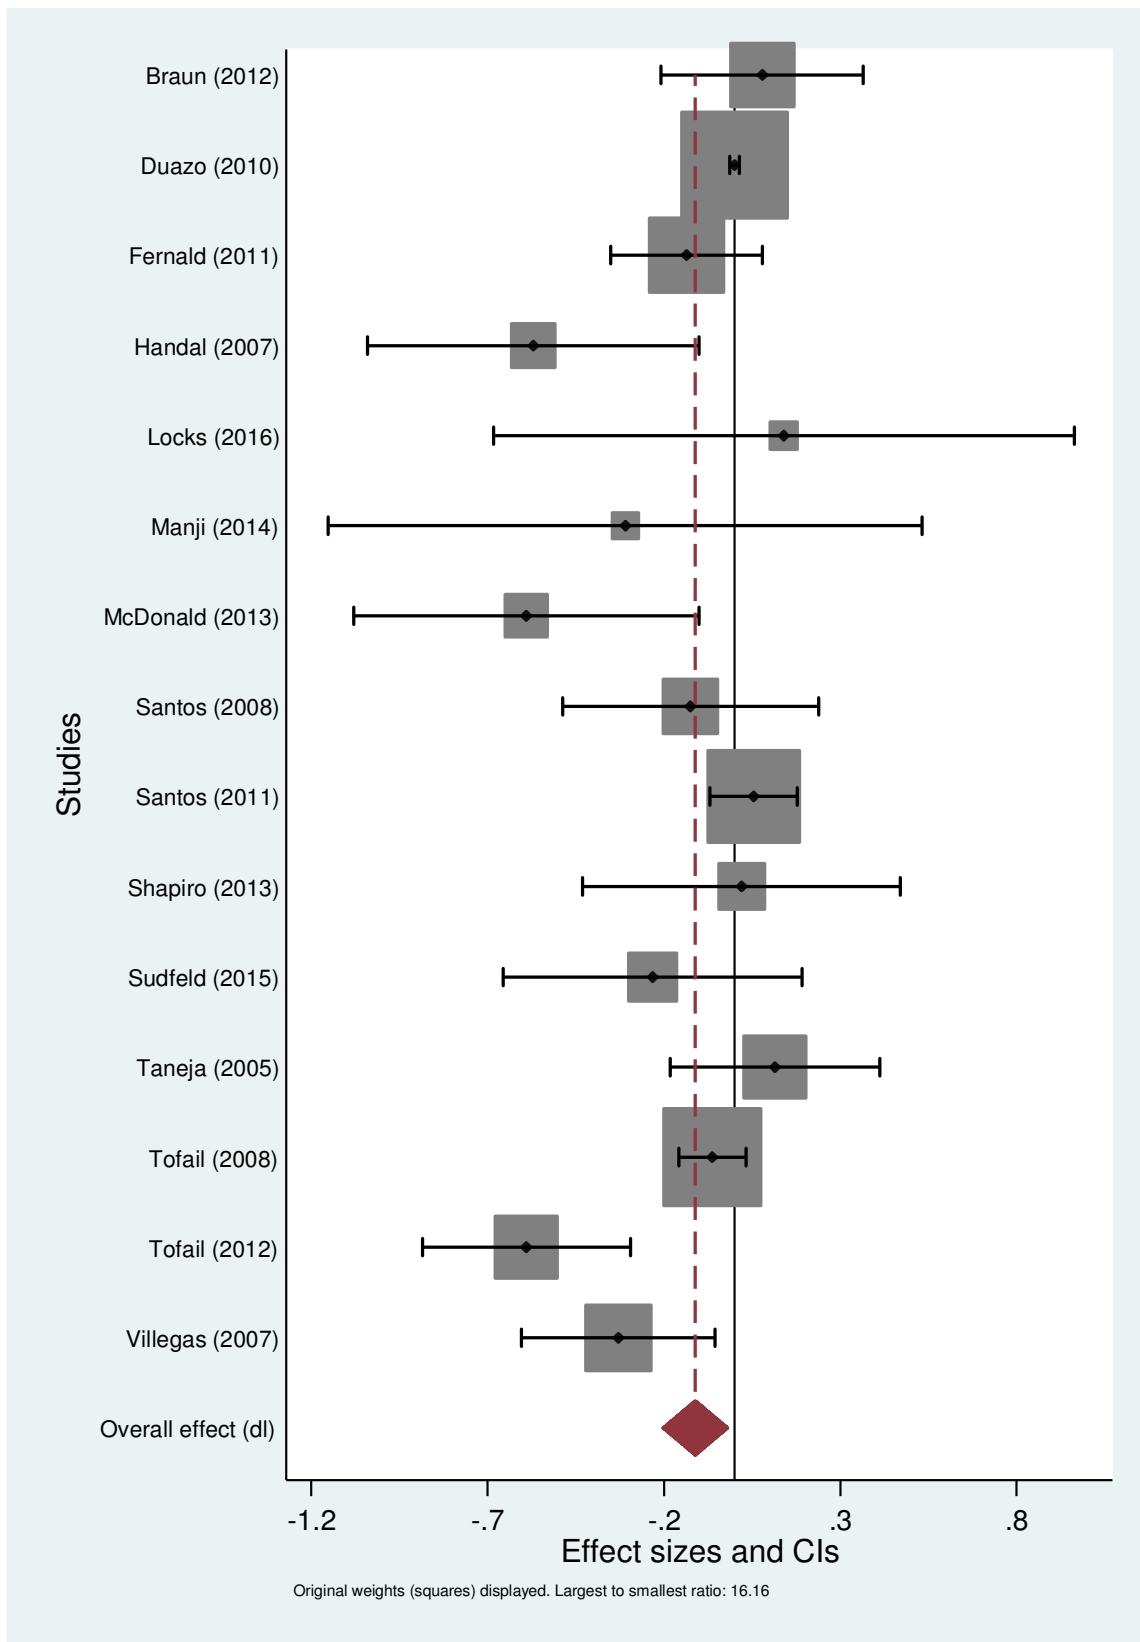

Figure 16: Association between moderately low birth weight (reference: normal birth weight) and motor development.

1  
2  
3  
4  
5  
6  
7  
8  
9  
10  
11  
12  
13  
14  
15  
16  
17  
18  
19  
20  
21  
22  
23  
24  
25  
26  
27  
28  
29  
30  
31  
32  
33  
34  
35  
36  
37  
38  
39  
40  
41  
42  
43  
44  
45  
46  
47  
48  
49  
50  
51  
52  
53  
54  
55  
56  
57  
58  
59  
60

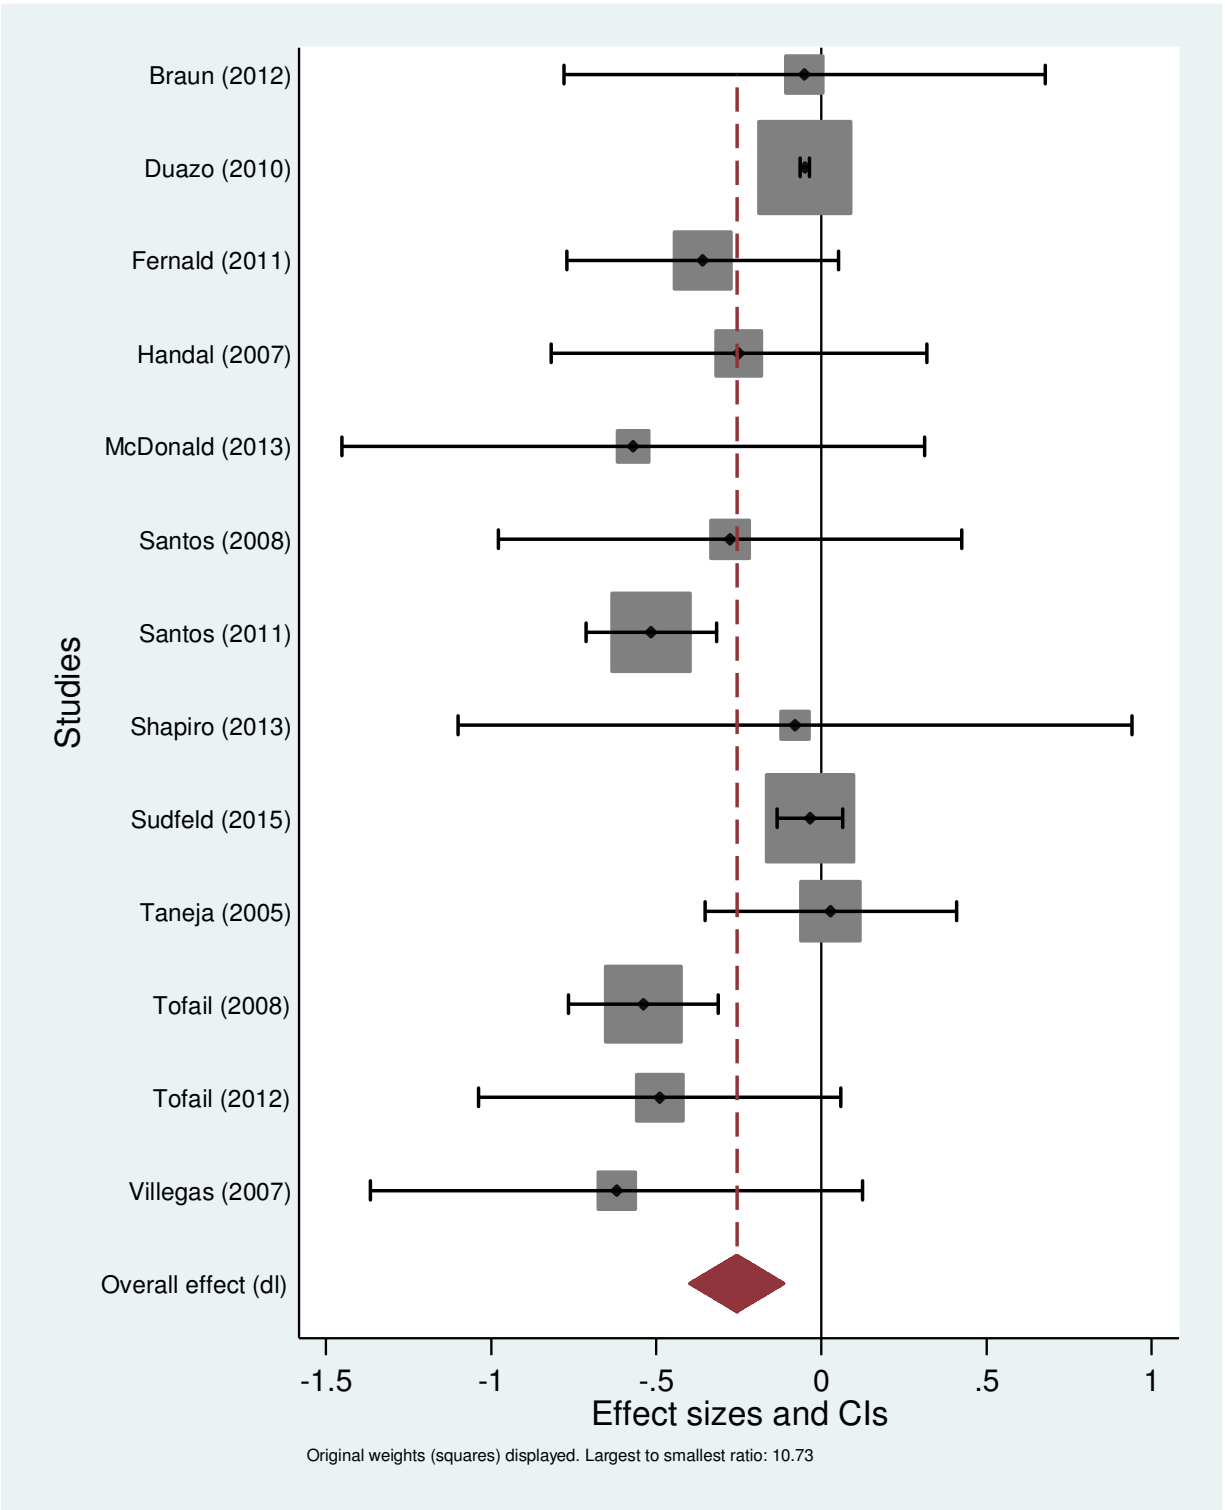

Figure 17: Association between very low birth weight (reference: normal birth weight) and motor development.



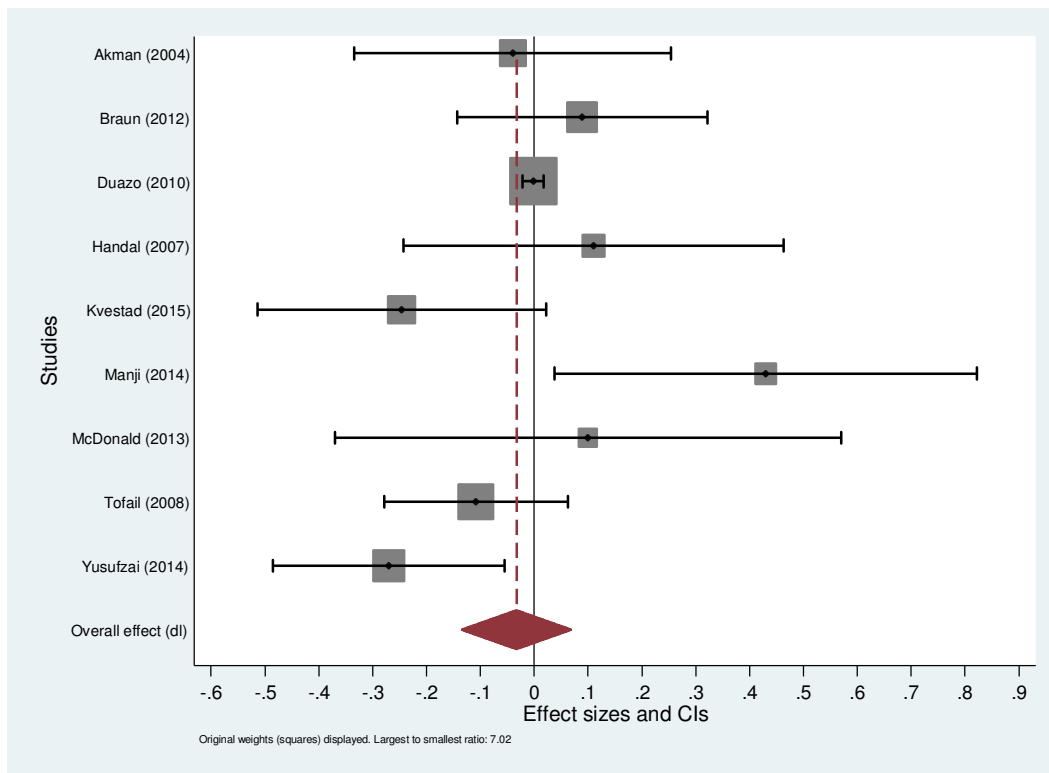

**Figure 18: Association between child mild anemia (reference: no anemia) and motor development.**

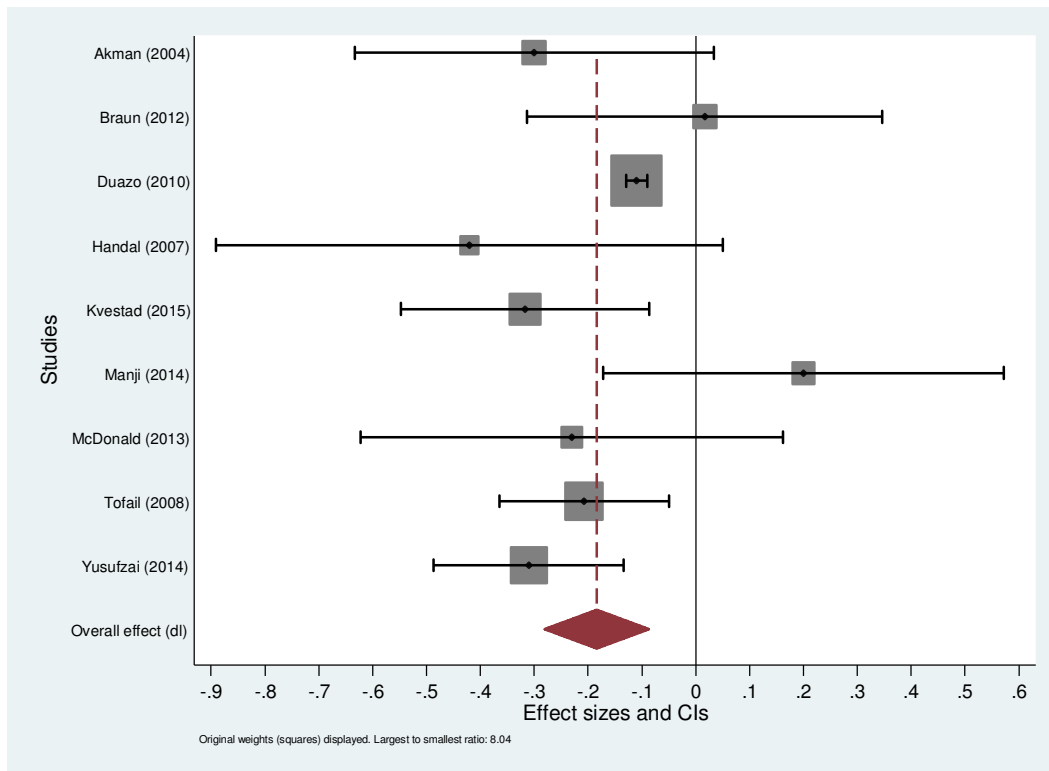

**Figure 19: Association between child moderate anemia (reference: no anemia) and motor development.**

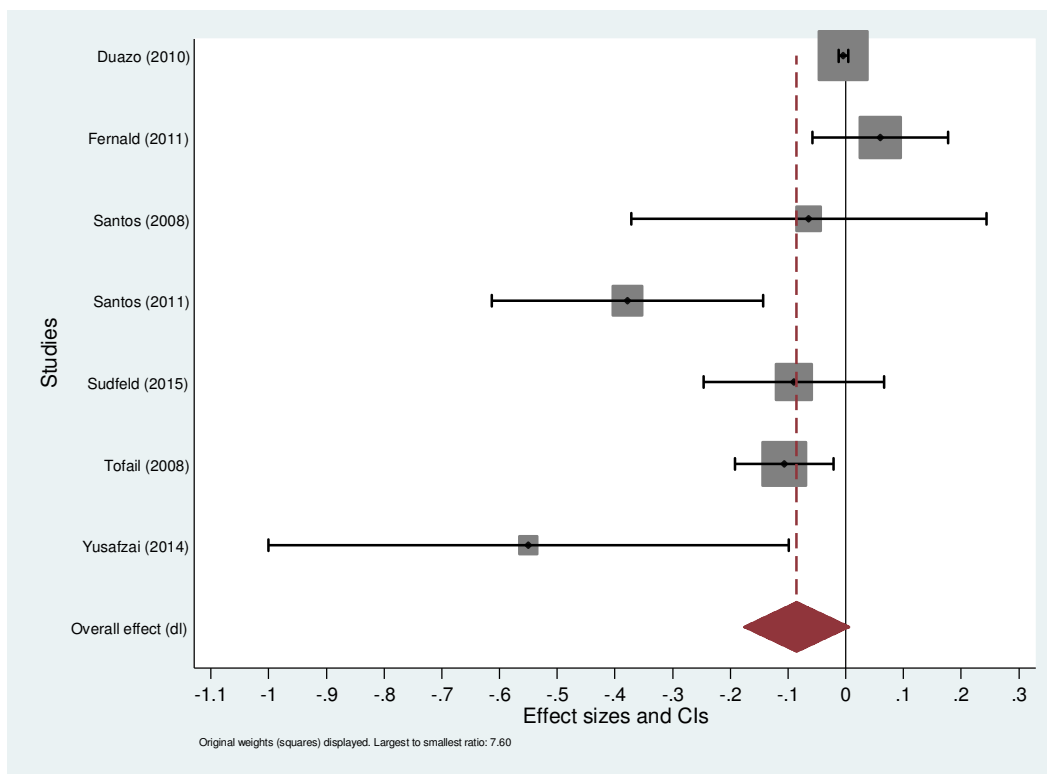

Figure 20: Association between lack of access to clean water (reference: access to clean water) and motor development.

1  
2  
3  
4  
5  
6  
7  
8  
9  
10  
11  
12  
13  
14  
15  
16  
17  
18  
19  
20  
21  
22  
23  
24  
25  
26  
27  
28  
29  
30  
31  
32  
33  
34  
35  
36  
37  
38  
39  
40  
41  
42  
43  
44  
45  
46  
47  
48  
49  
50  
51  
52  
53  
54  
55  
56  
57  
58  
59  
60

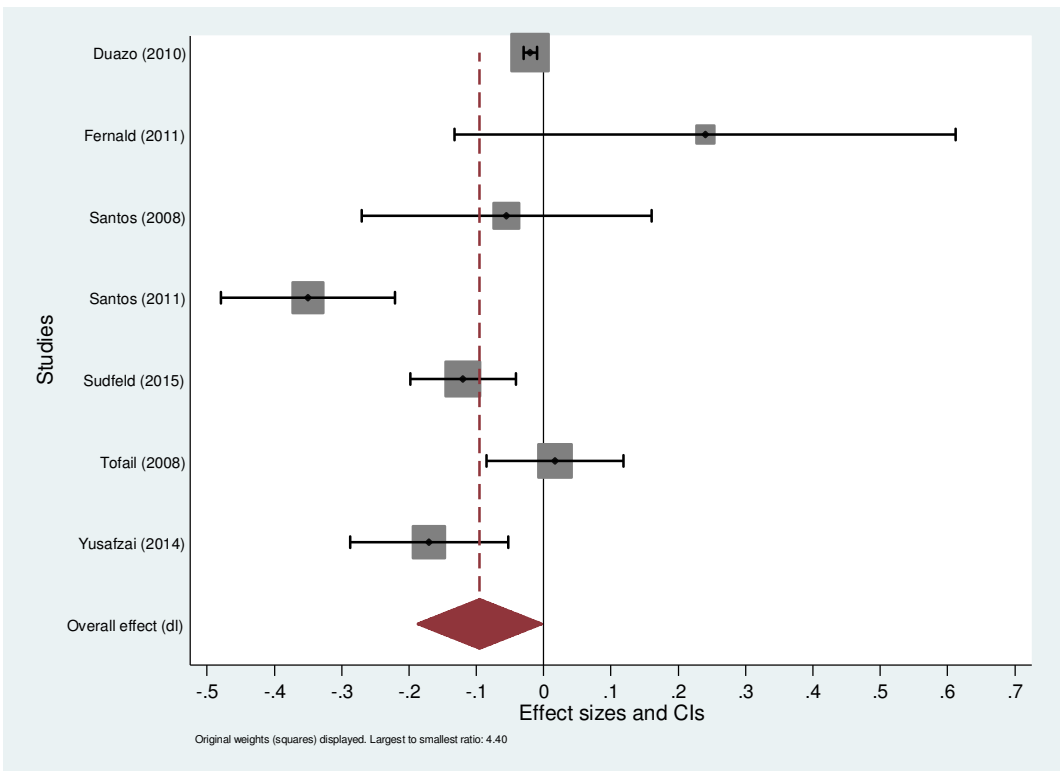

Figure 21: Association between lack of access to sanitation (reference: access to sanitation) and motor development.

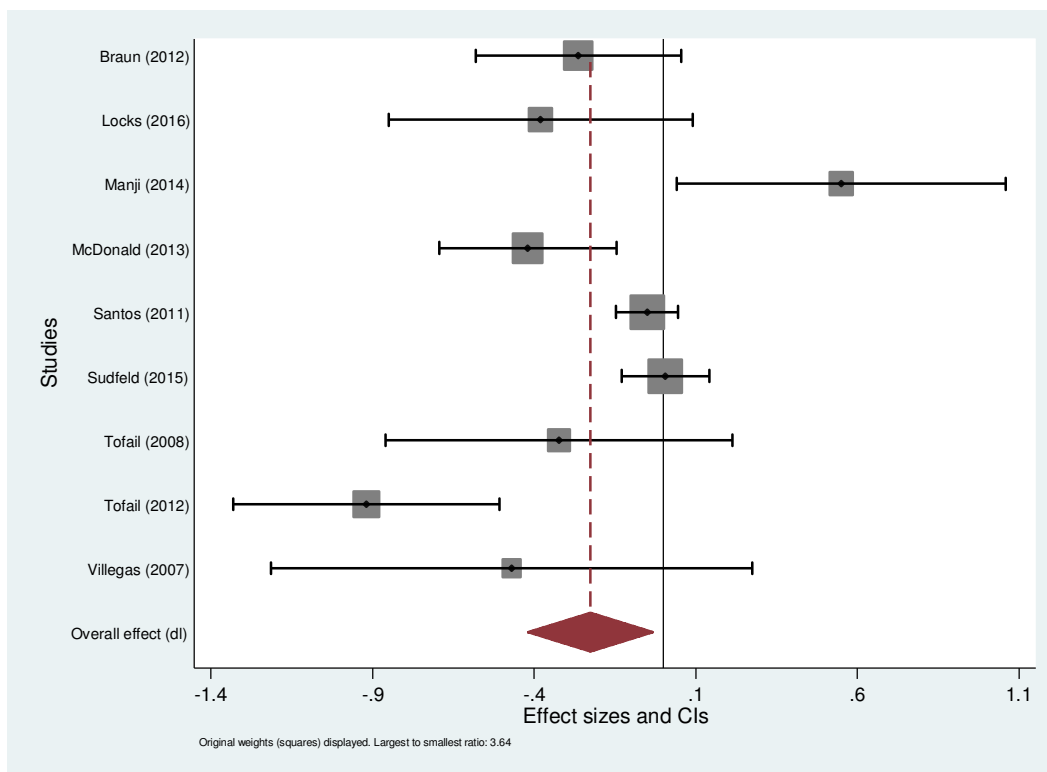

**Figure 22: Association between preterm-AGA (reference: term-AGA) and motor development.**

1  
2  
3  
4  
5  
6  
7  
8  
9  
10  
11  
12  
13  
14  
15  
16  
17  
18  
19  
20  
21  
22  
23  
24  
25  
26  
27  
28  
29  
30  
31  
32  
33  
34  
35  
36  
37  
38  
39  
40  
41  
42  
43  
44  
45  
46  
47  
48  
49  
50  
51  
52  
53  
54  
55  
56  
57  
58  
59  
60

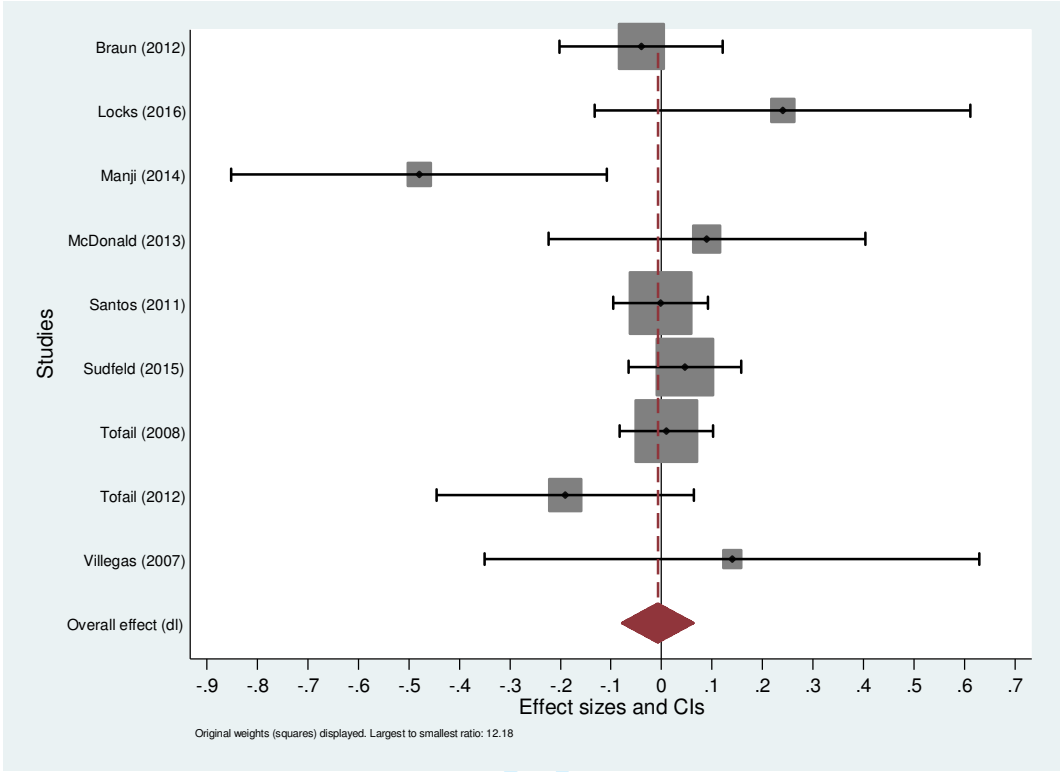

**Figure 23: Association between term-SGA (reference: term-AGA) and motor development.**

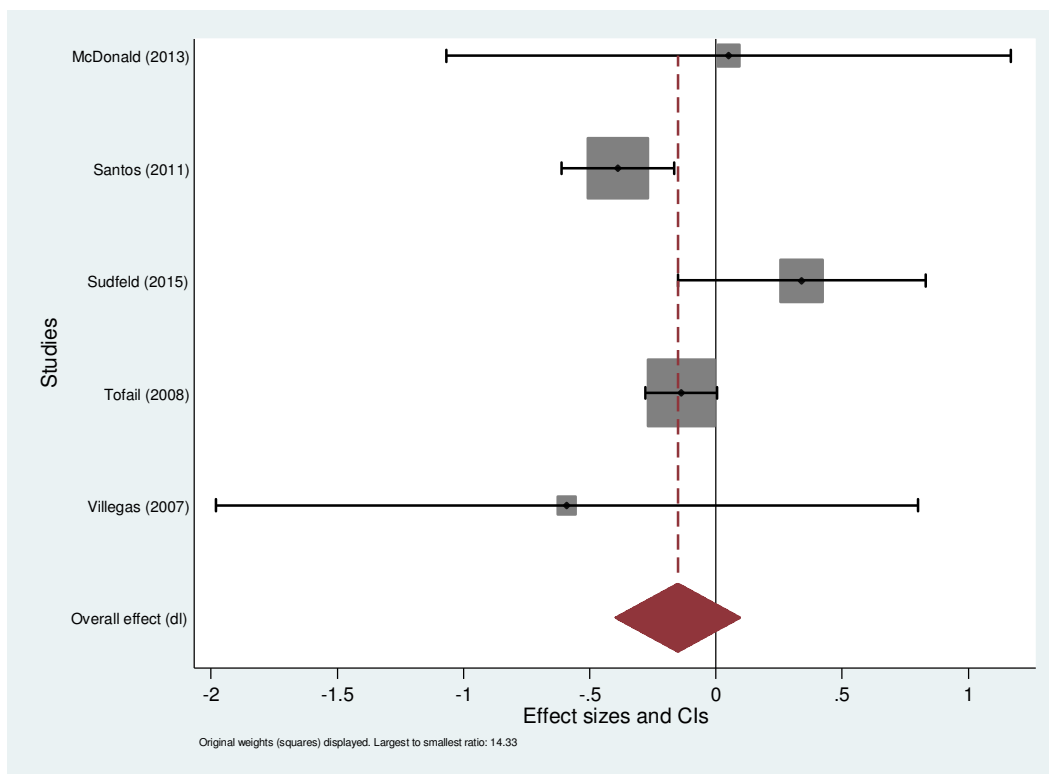

**Figure 24: Association between preterm-SGA (reference: term-AGA) and motor development.**

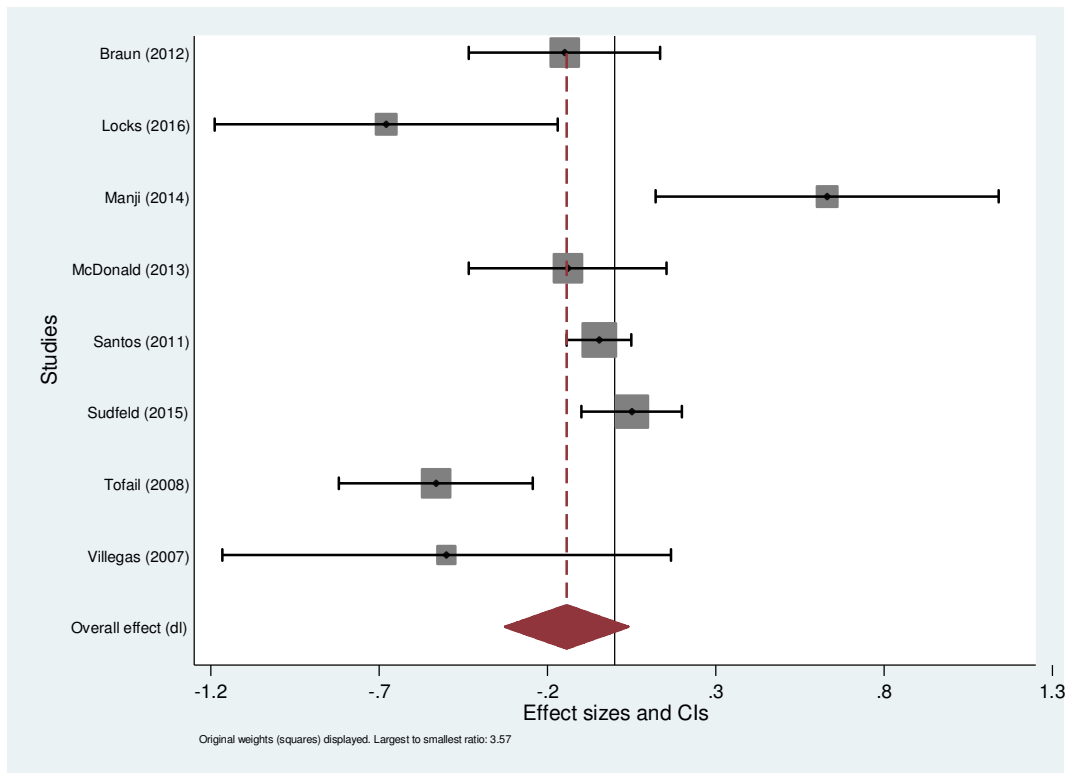

**Figure 25: Association between late preterm birth, 34-37 weeks (reference: term) and motor development.**



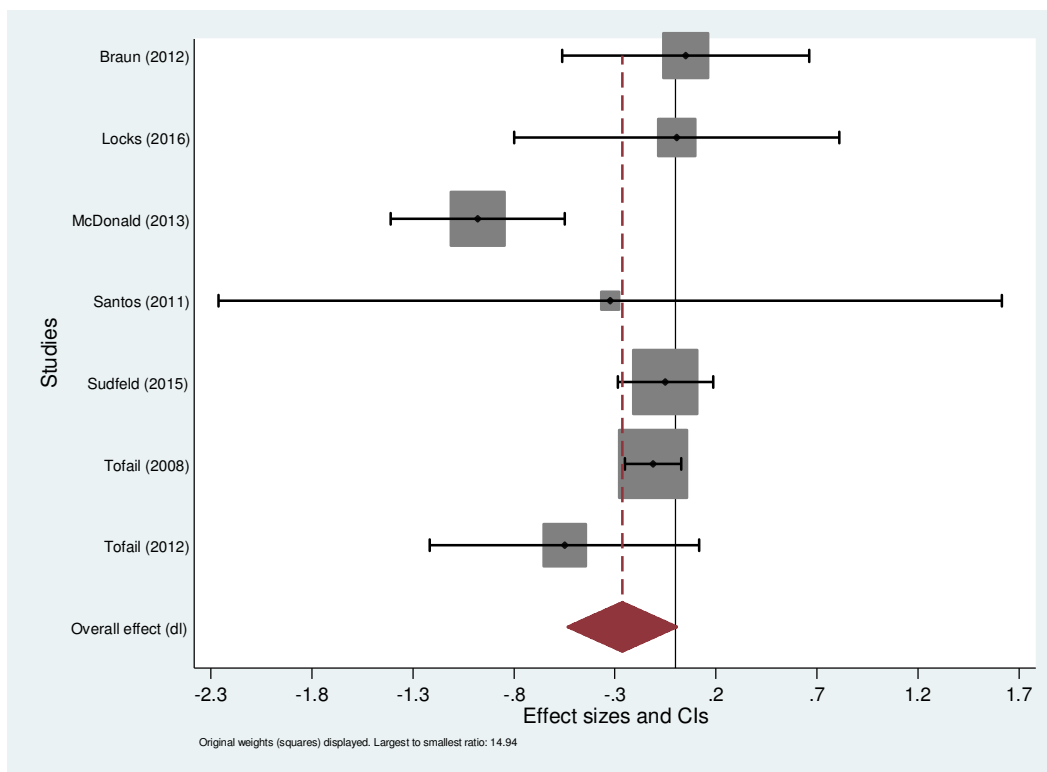

**Figure 26: Association between early preterm birth, < 34 weeks (reference: term) and motor development.**

1  
2  
3  
4  
5  
6  
7  
8  
9  
10  
11  
12  
13  
14  
15  
16  
17  
18  
19  
20  
21  
22  
23  
24  
25  
26  
27  
28  
29  
30  
31  
32  
33  
34  
35  
36  
37  
38  
39  
40  
41  
42  
43  
44  
45  
46  
47  
48  
49  
50  
51  
52  
53  
54  
55  
56  
57  
58  
59  
60

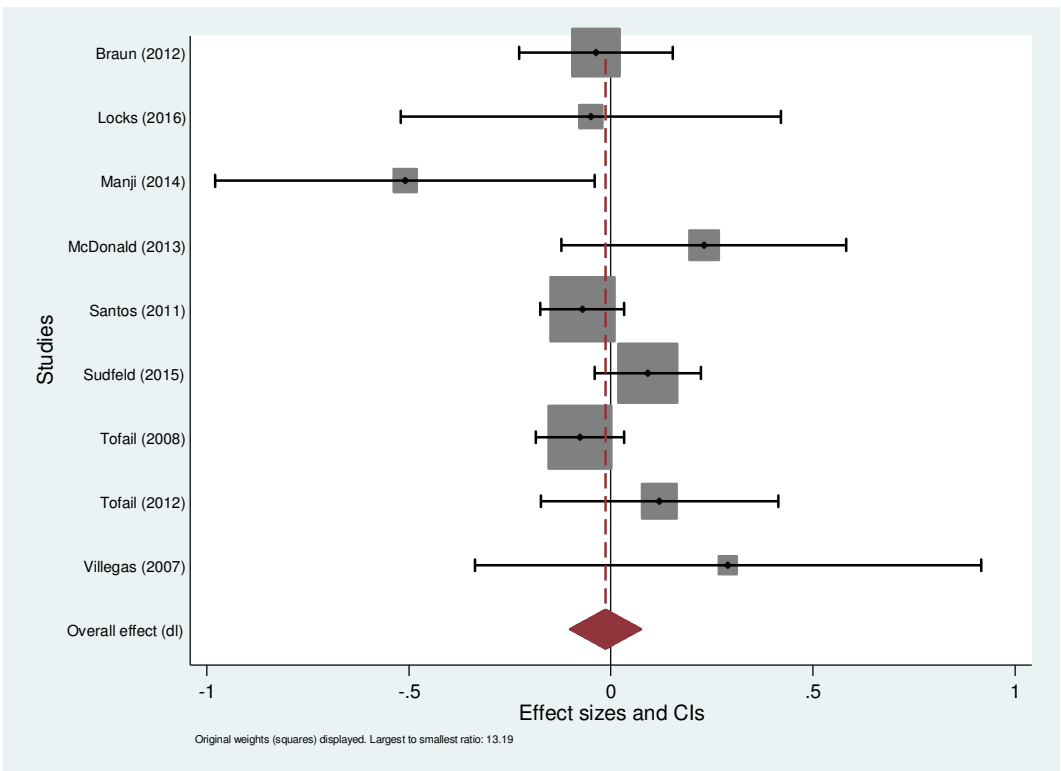

**Figure 27: Association between moderate SGA (reference: AGA) and motor development.**

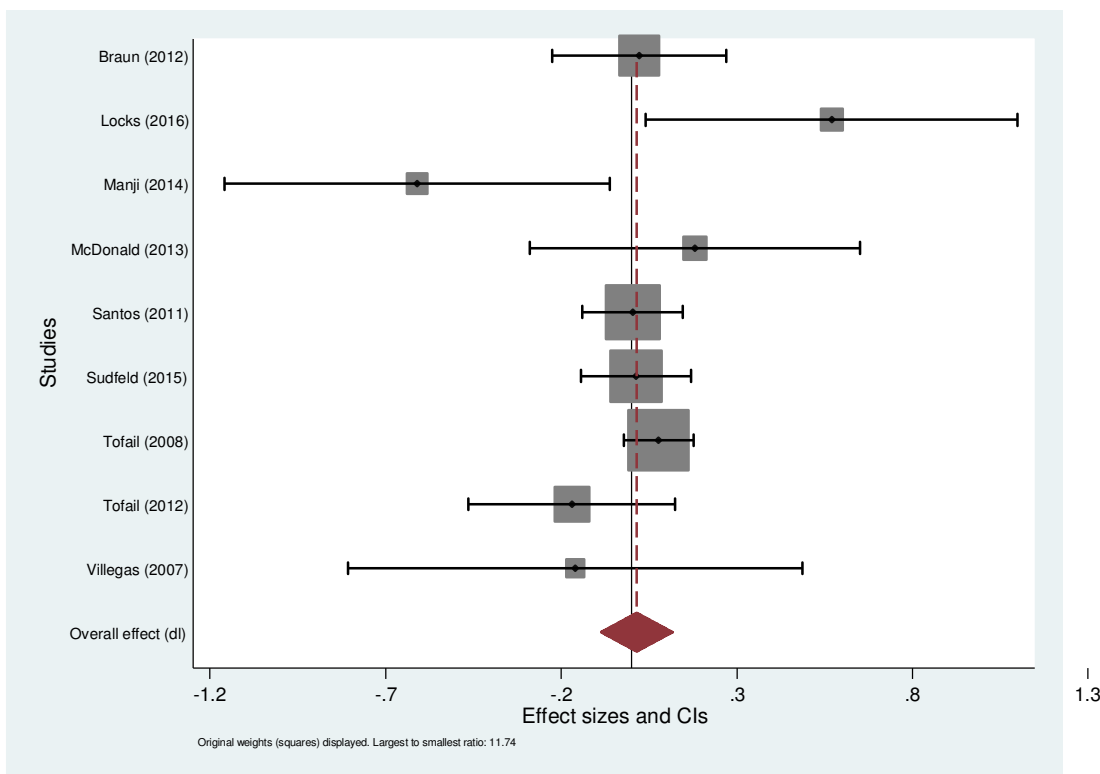

**Figure 28: Association between severe SGA (reference: AGA) and motor development.**

### 3. Child Risk Factors on Child's Language Development

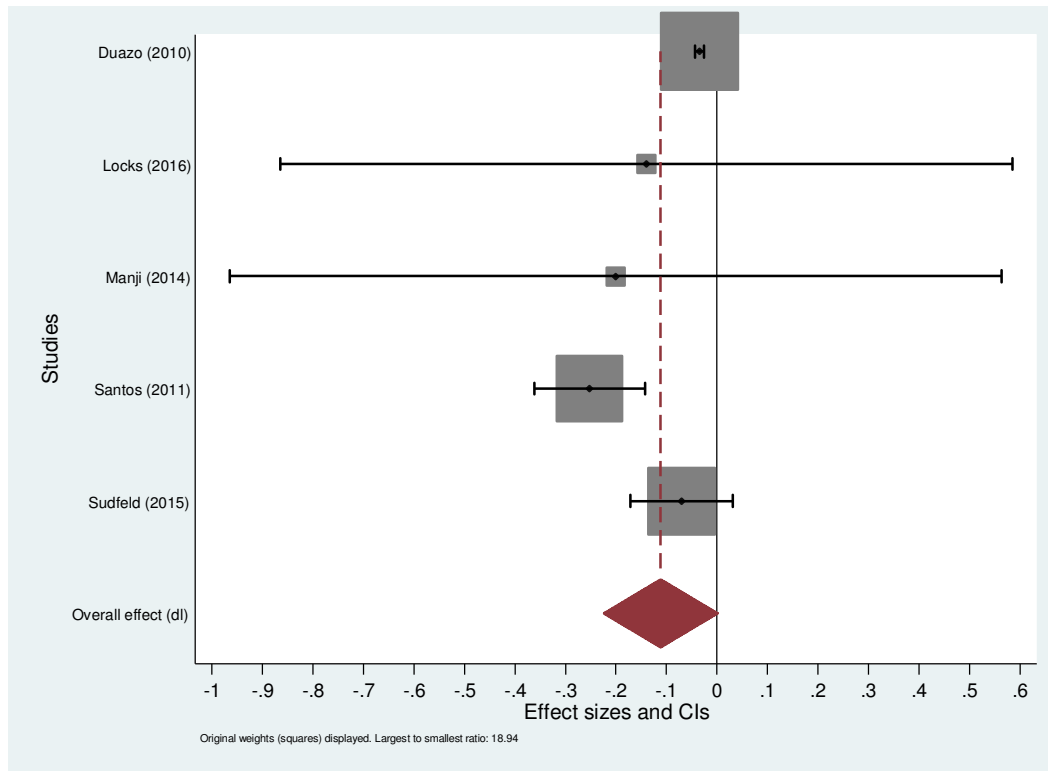

Figure 29: Association between low birth weight (LBW) and (reference: normal birth weight) and language development.

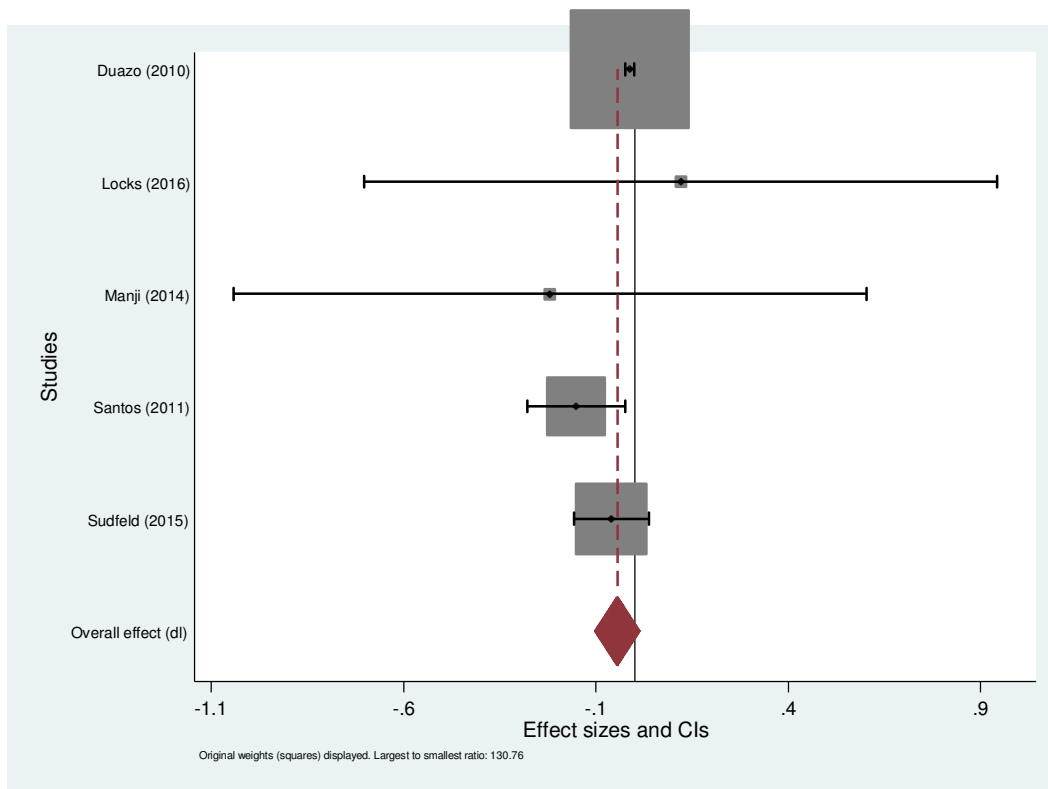

**Figure 30: Association between moderately low birth weight and (reference: normal birth weight) and language development.**

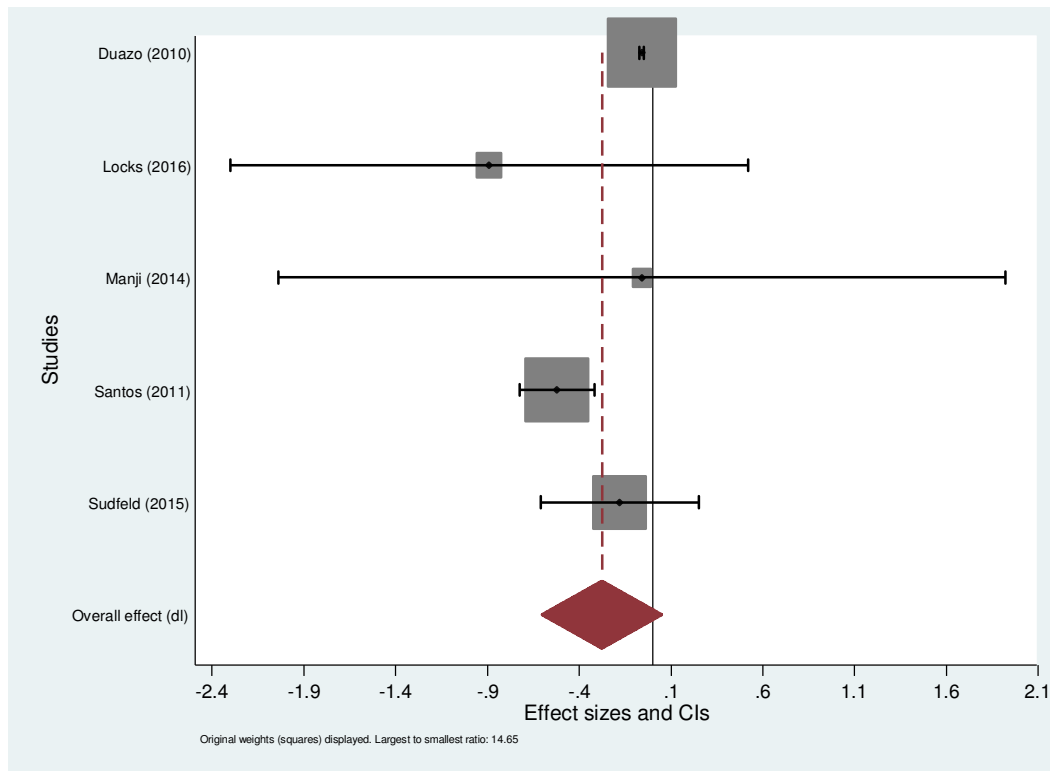

**Figure 31: Association between very low birth weight and (reference: normal birth weight) and language development.**

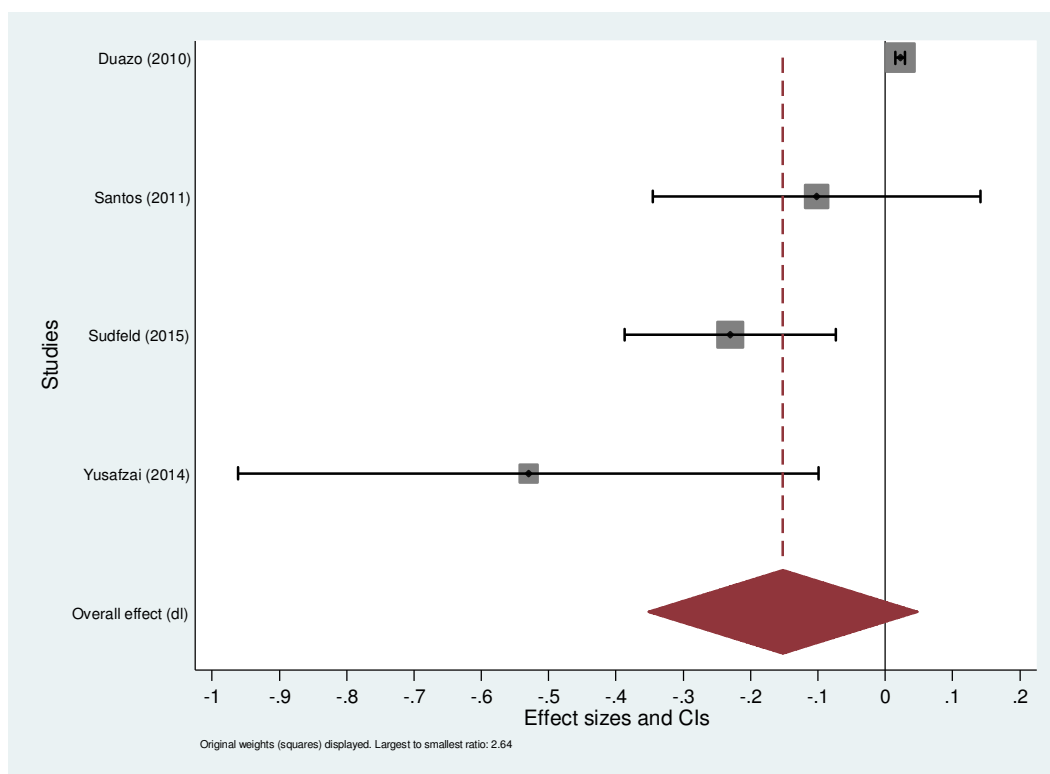

Figure 32: Association between lack of access to clean water (reference: access to clean water) and language development.

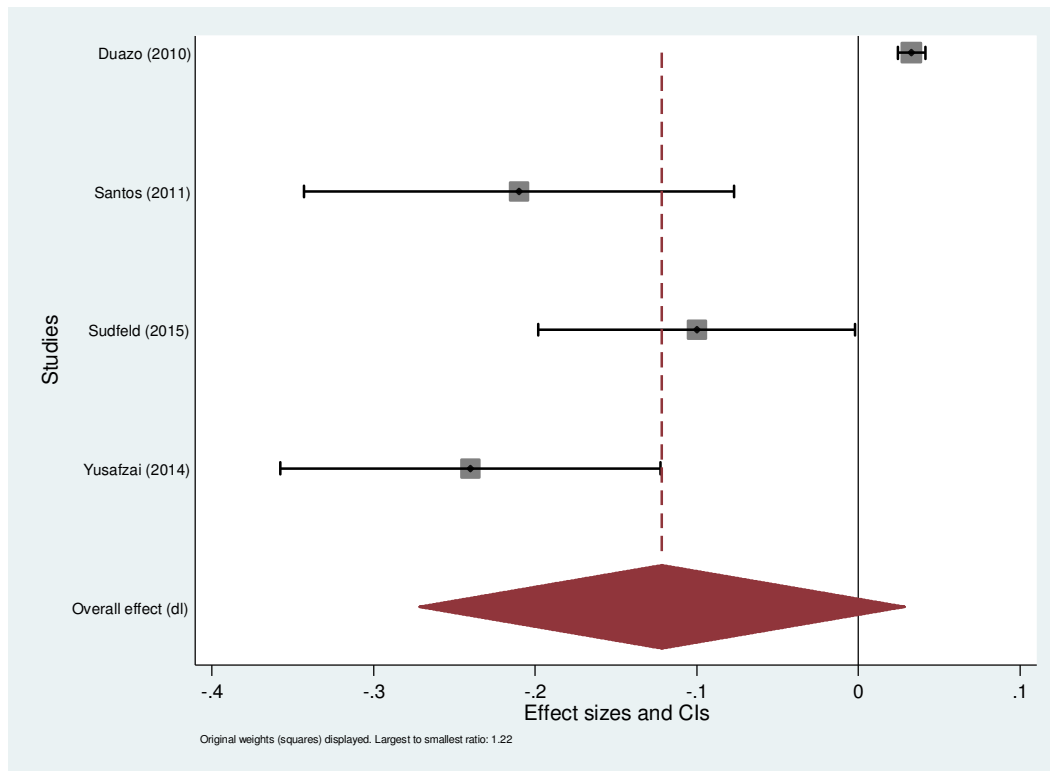

**Figure 33: Association between lack of access to sanitation (reference: access to sanitation) and language development.**



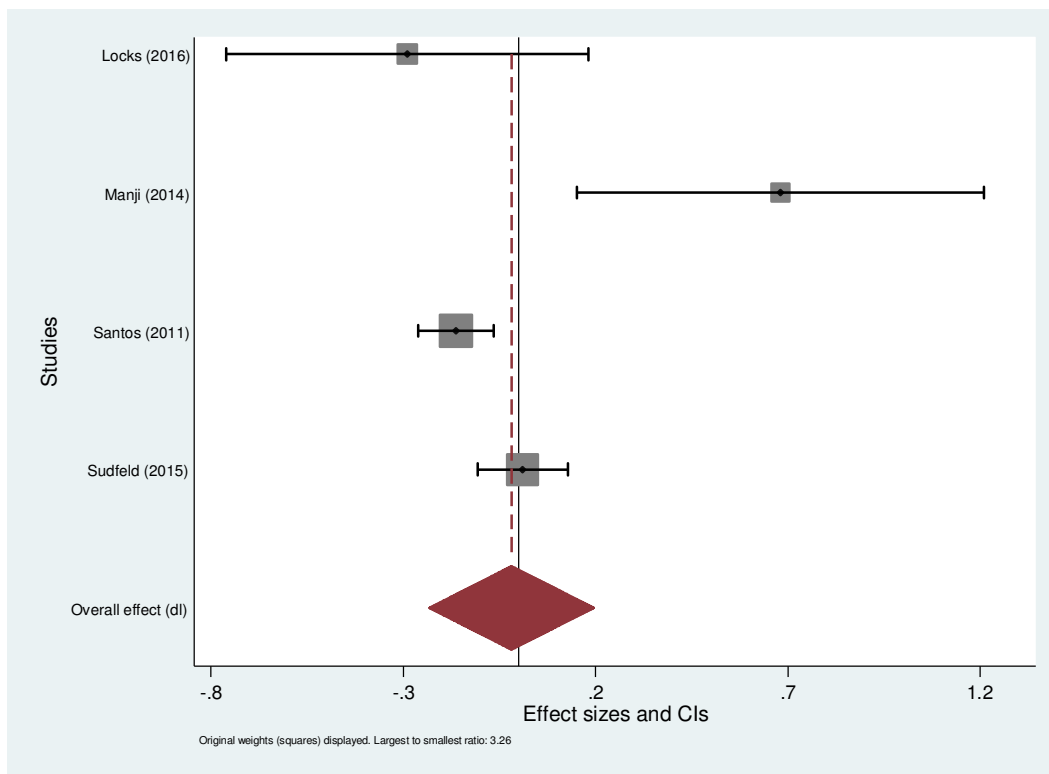

**Figure 34: Association between preterm-AGA (reference: term-AGA) and language development.**

1  
2  
3  
4  
5  
6  
7  
8  
9  
10  
11  
12  
13  
14  
15  
16  
17  
18  
19  
20  
21  
22  
23  
24  
25  
26  
27  
28  
29  
30  
31  
32  
33  
34  
35  
36  
37  
38  
39  
40  
41  
42  
43  
44  
45  
46  
47  
48  
49  
50  
51  
52  
53  
54  
55  
56  
57  
58  
59  
60

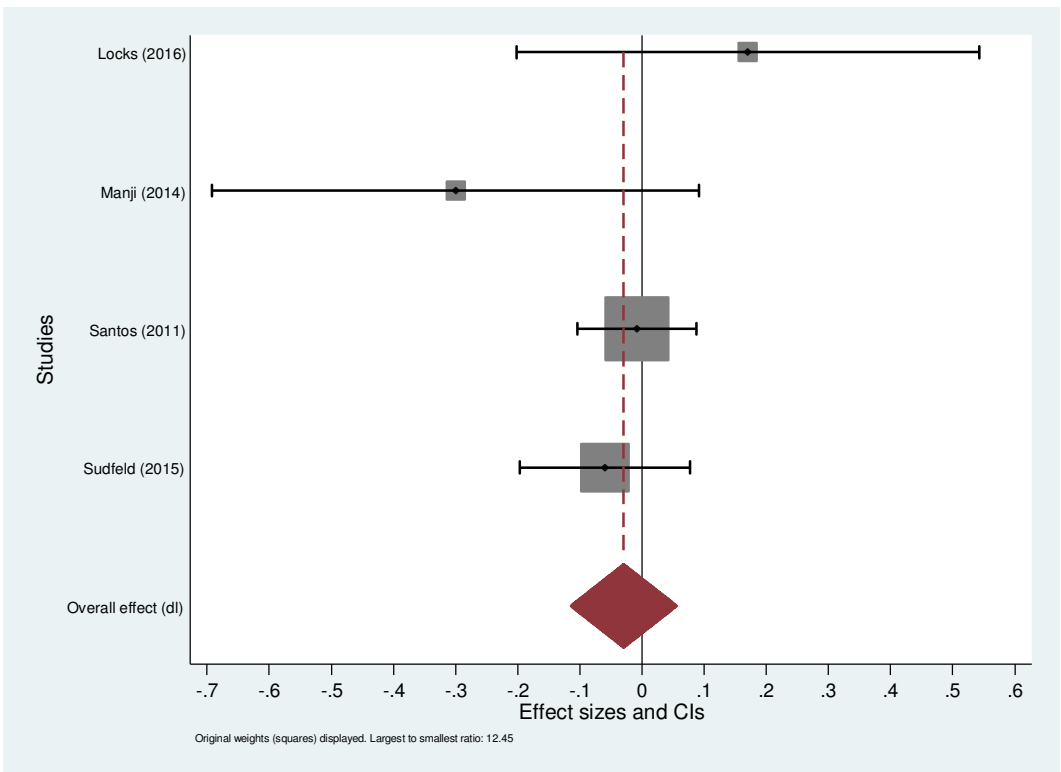

Figure 35: Association between term-SGA (reference: term-AGA) and language development.

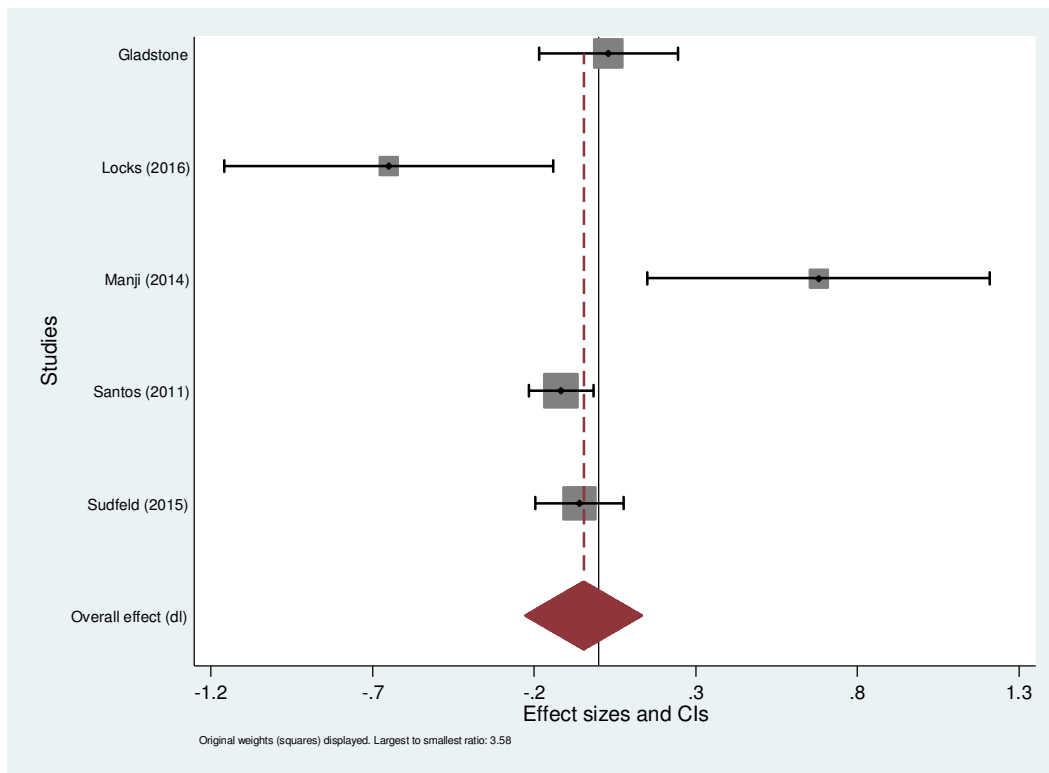

Figure 36: Association between late preterm birth, 34-37 weeks (reference: term) and language development.

1  
2  
3  
4  
5  
6  
7  
8  
9  
10  
11  
12  
13  
14  
15  
16  
17  
18  
19  
20  
21  
22  
23  
24  
25  
26  
27  
28  
29  
30  
31  
32  
33  
34  
35  
36  
37  
38  
39  
40  
41  
42  
43  
44  
45  
46  
47  
48  
49  
50  
51  
52  
53  
54  
55  
56  
57  
58  
59  
60

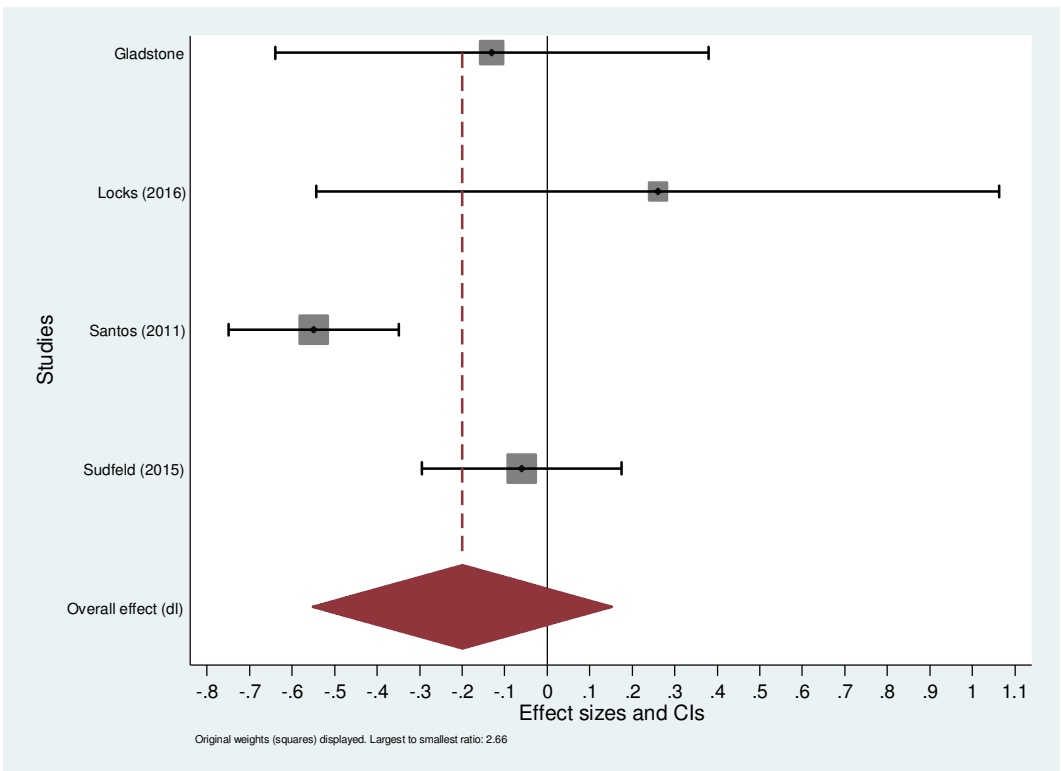

**Figure 37: Association between early preterm birth, < 34 weeks (reference: term) and language development.**

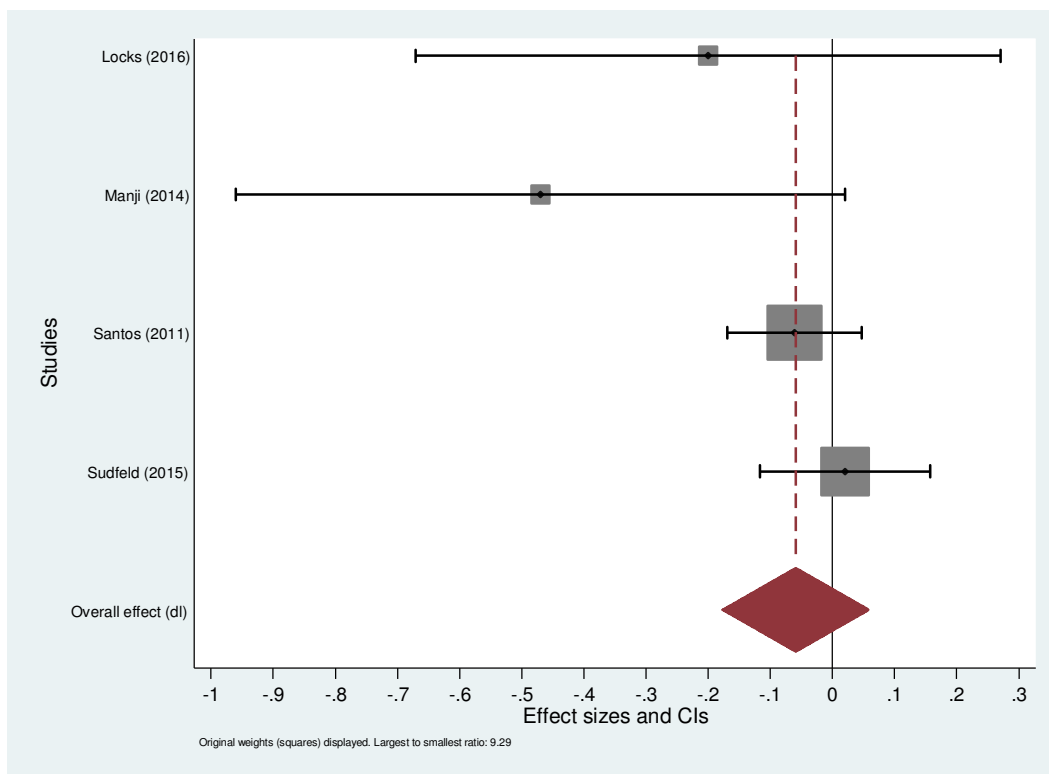

**Figure 38: Association between moderate SGA (reference: AGA) and language development.**

1  
2  
3  
4  
5  
6  
7  
8  
9  
10  
11  
12  
13  
14  
15  
16  
17  
18  
19  
20  
21  
22  
23  
24  
25  
26  
27  
28  
29  
30  
31  
32  
33  
34  
35  
36  
37  
38  
39  
40  
41  
42  
43  
44  
45  
46  
47  
48  
49  
50  
51  
52  
53  
54  
55  
56  
57  
58  
59  
60

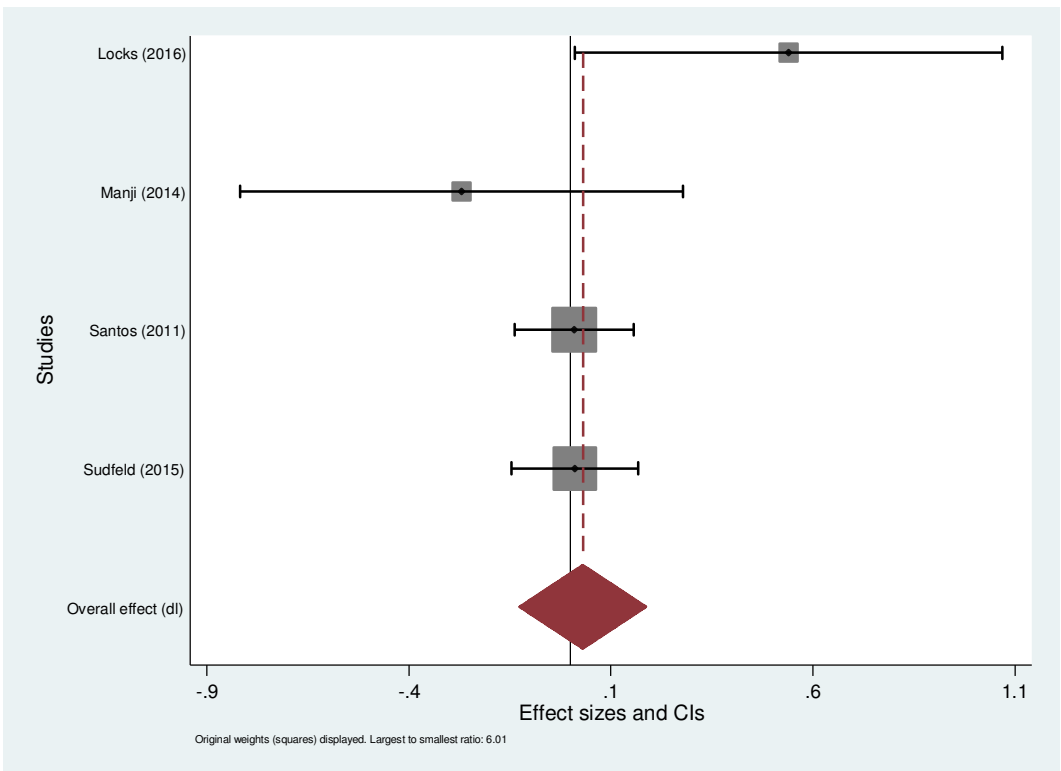

Figure 39: Association between severe SGA (reference: AGA) and language development.

4. Parental Risk Factors on Child's Cognitive Development

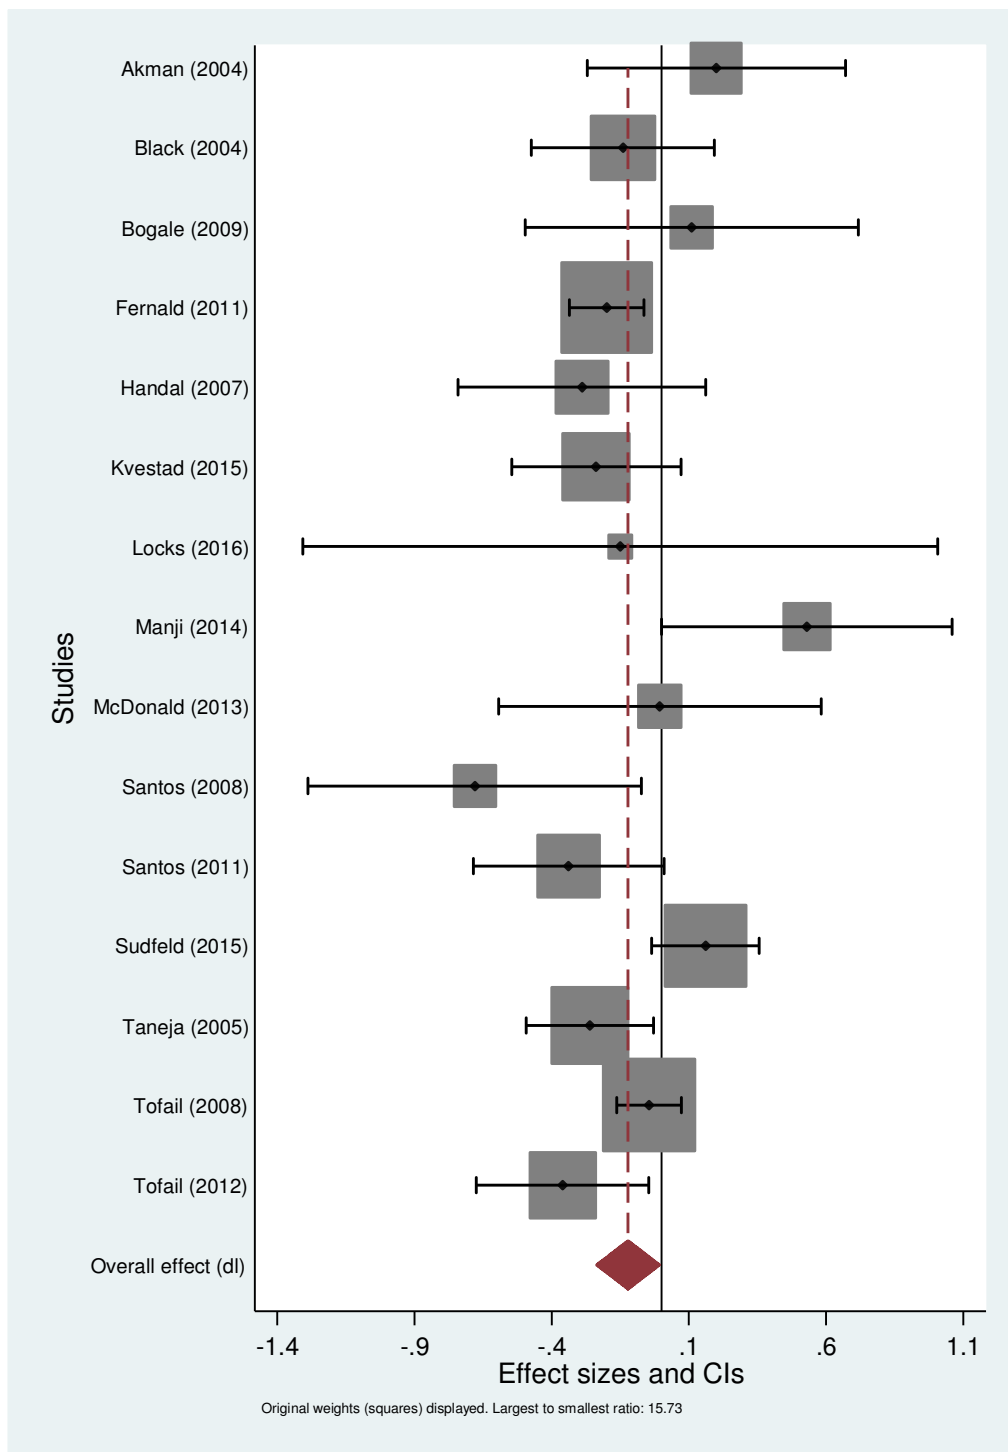

Figure 40: Association between no maternal education (reference: primary education) and cognitive development.

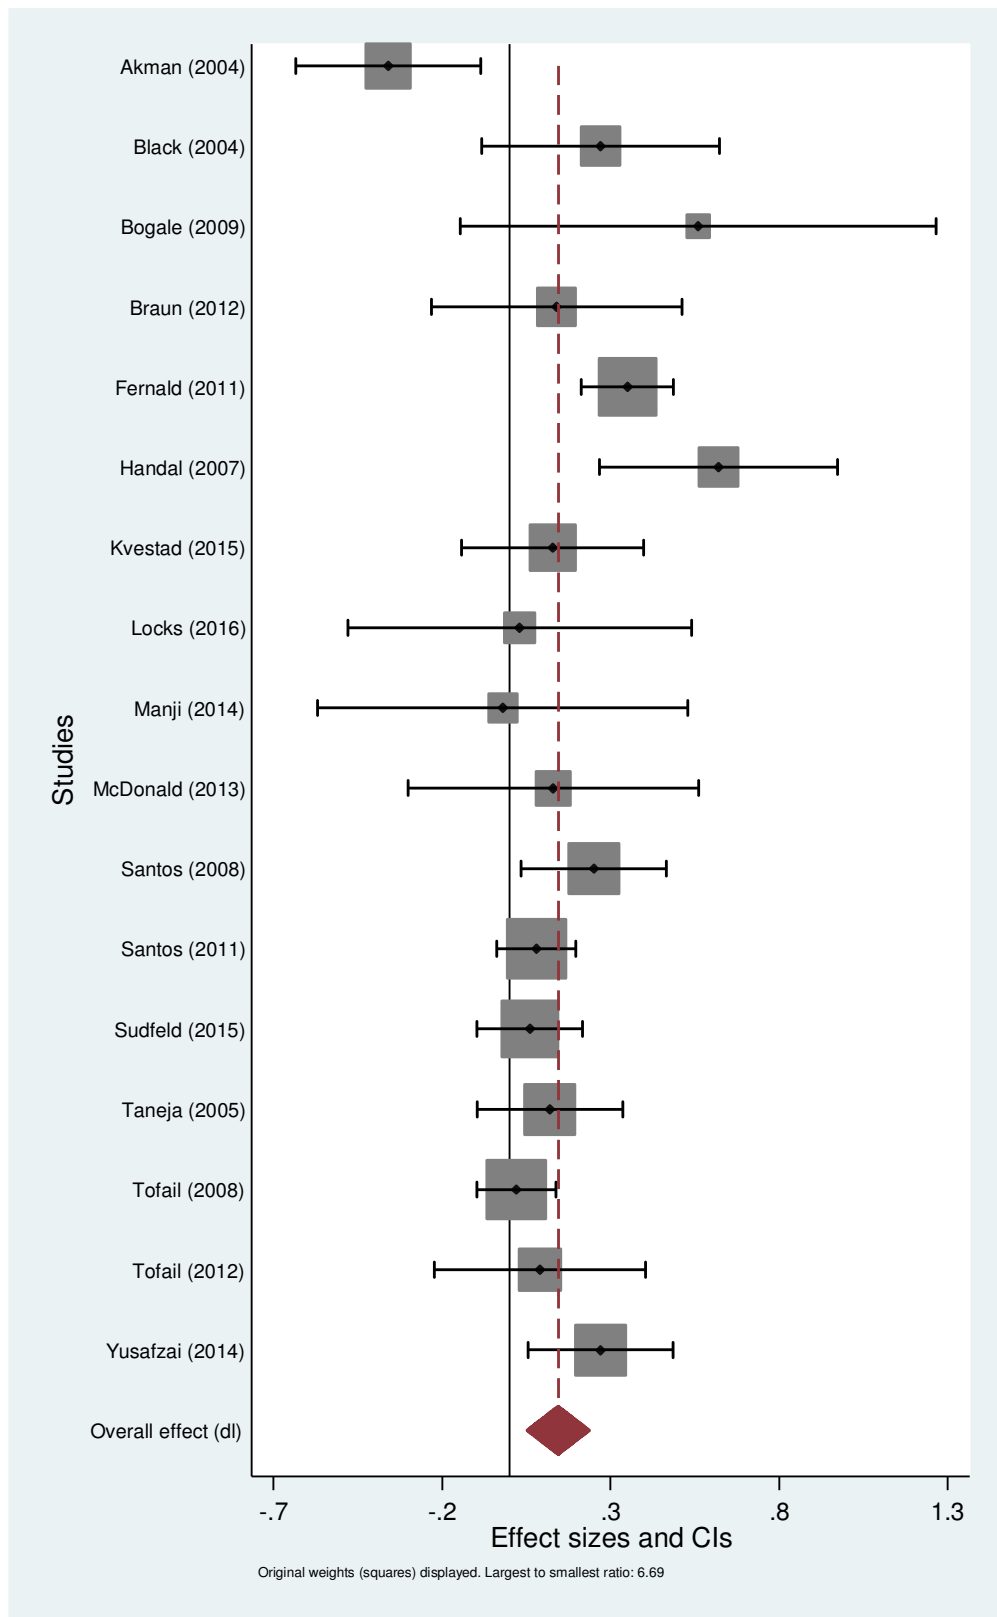

Figure 41: Association between maternal secondary education (reference: primary education) and cognitive development.



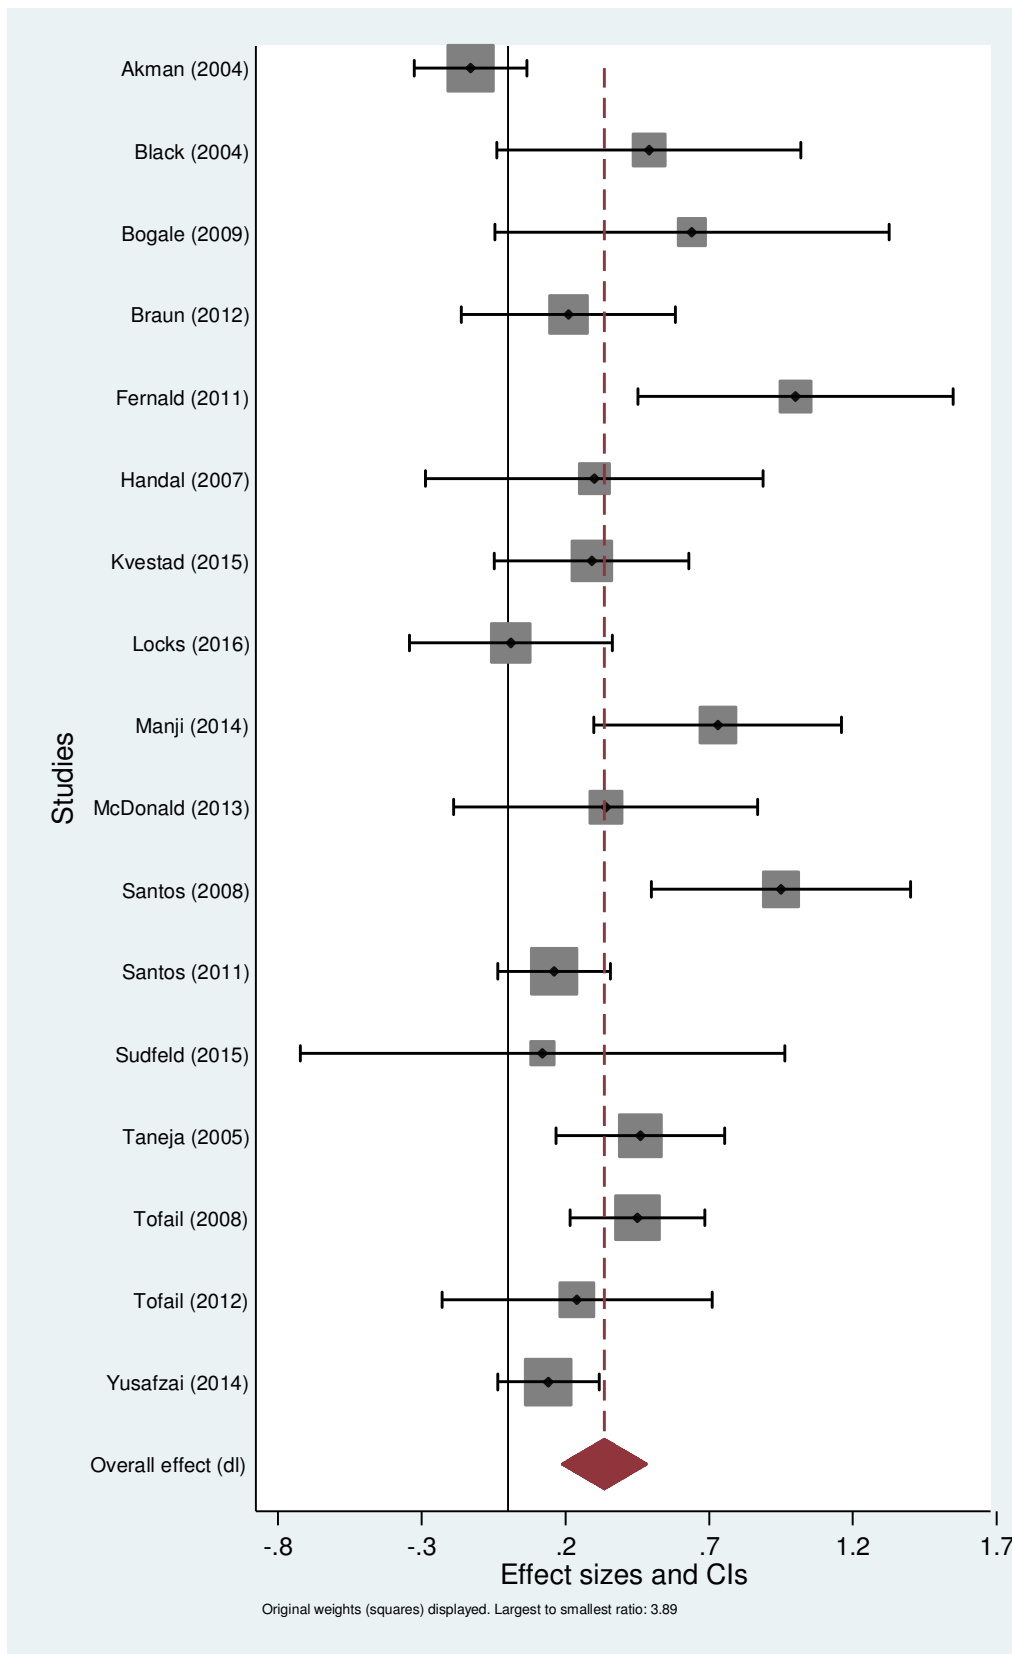

Figure 42: Association between maternal higher education (reference: primary education) and cognitive development.

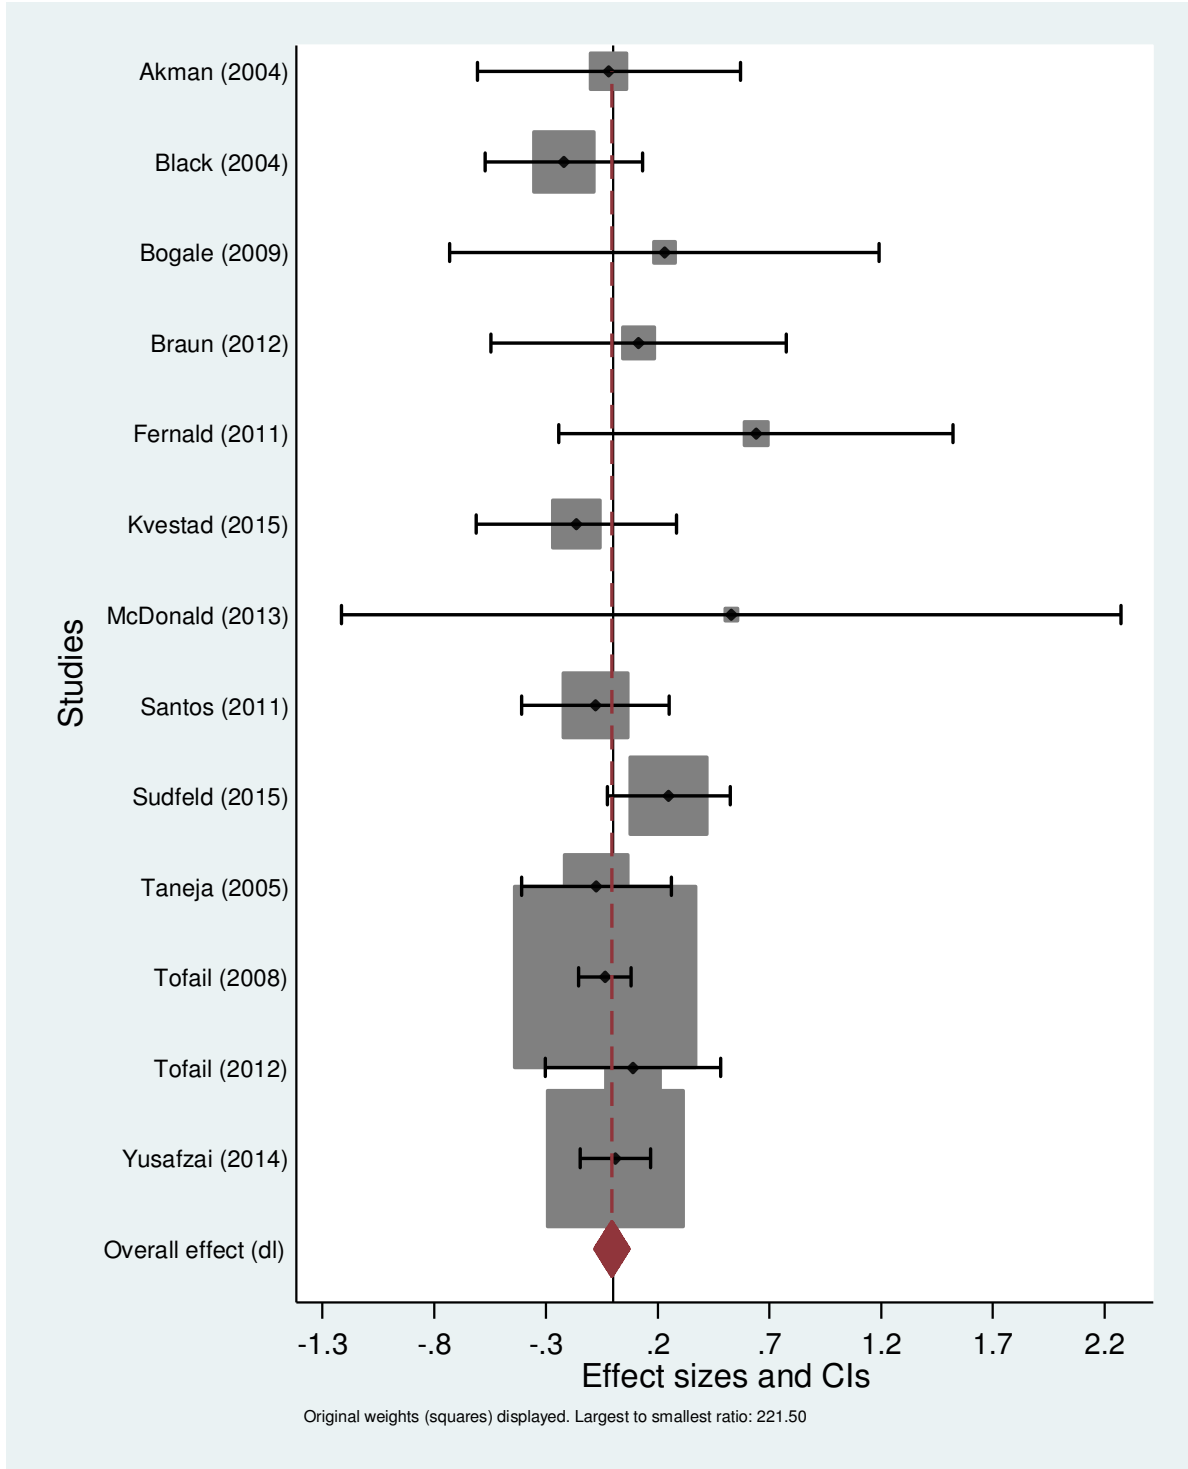

**Figure 43: Association between no paternal education (reference: primary education) and cognitive development.**

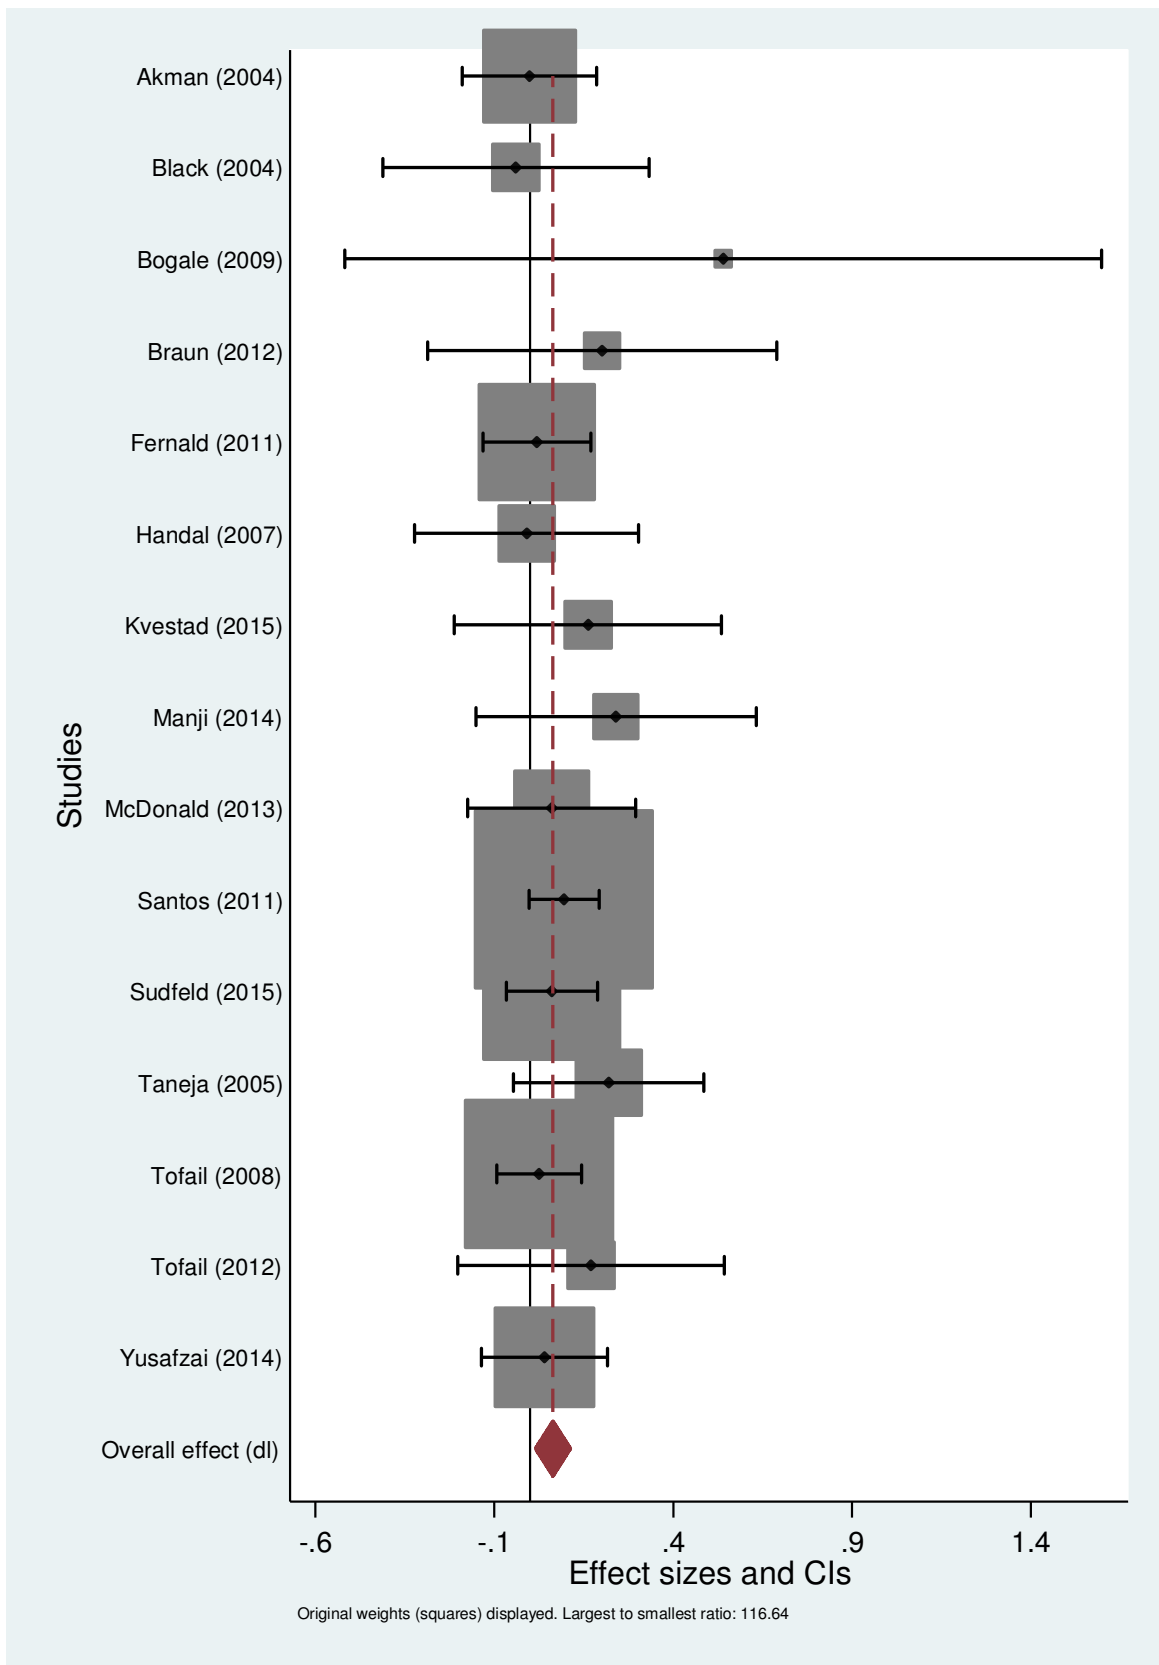

Figure 44: Association between paternal secondary education (reference: primary education) and cognitive development.

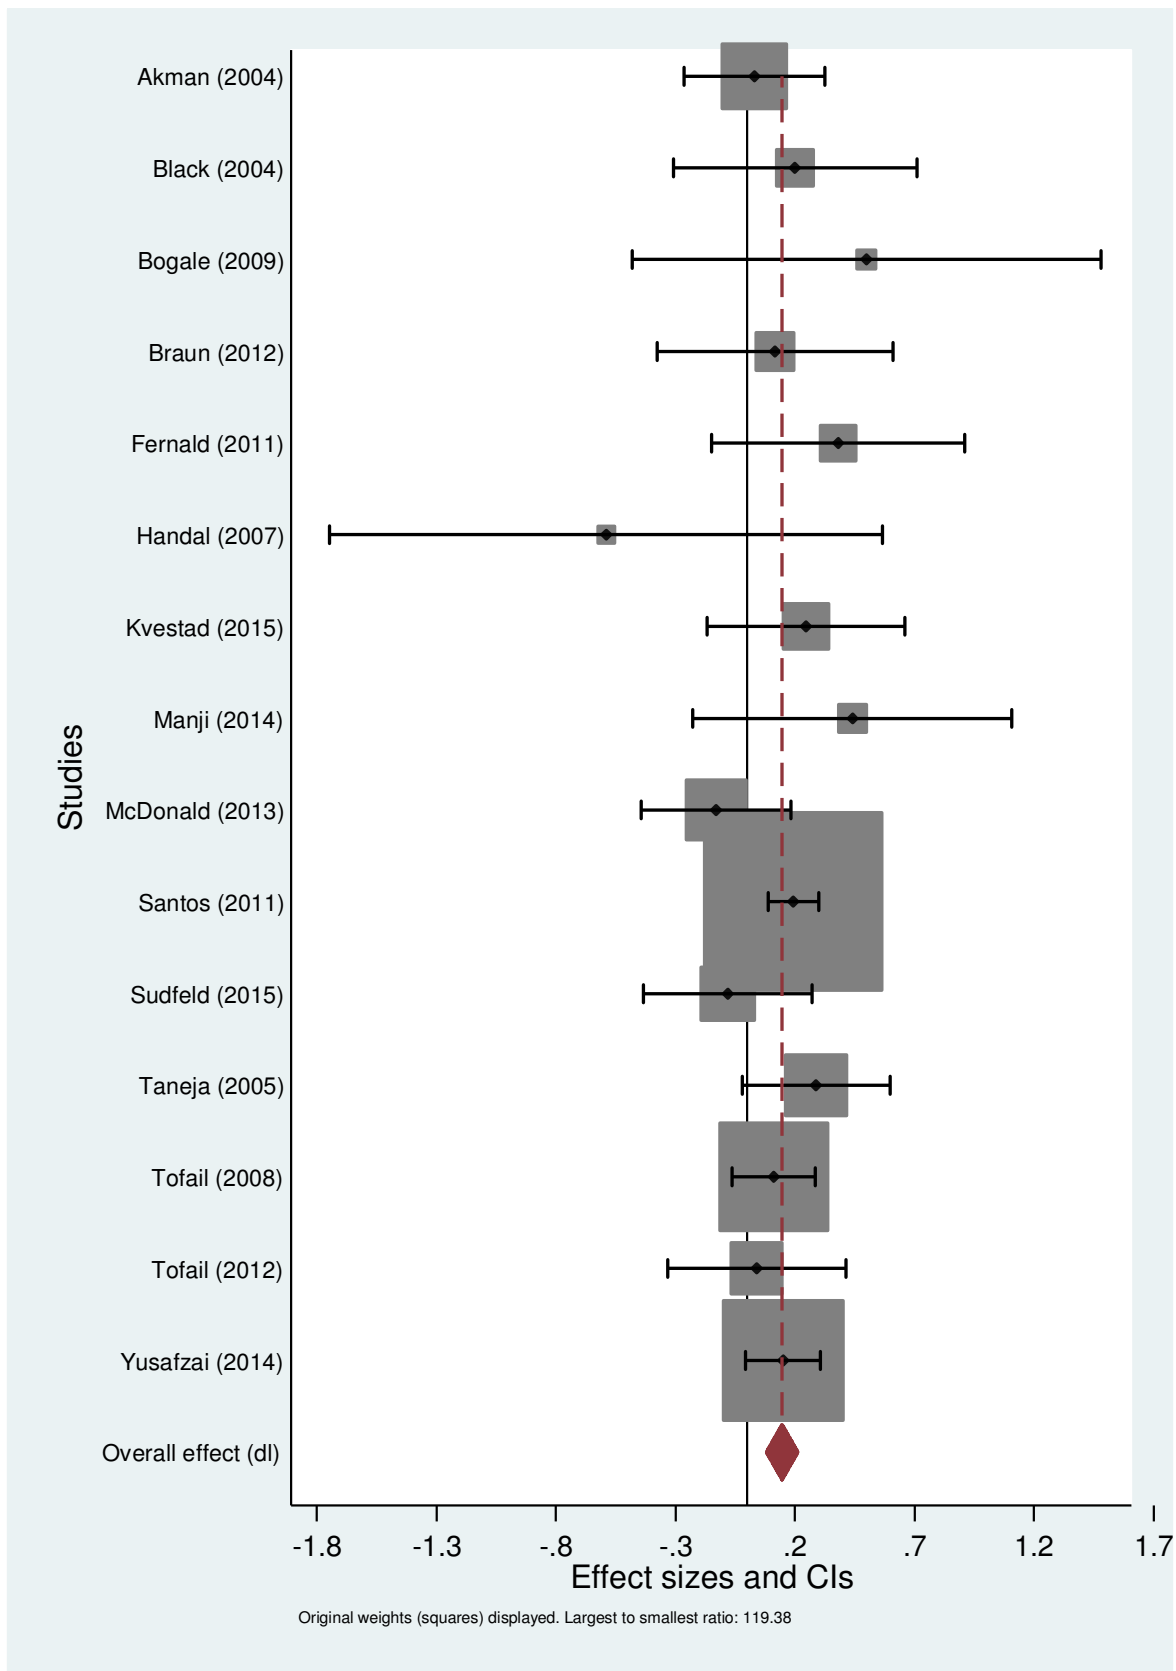

Figure 45: Association between paternal higher education (reference: primary education) and cognitive development.

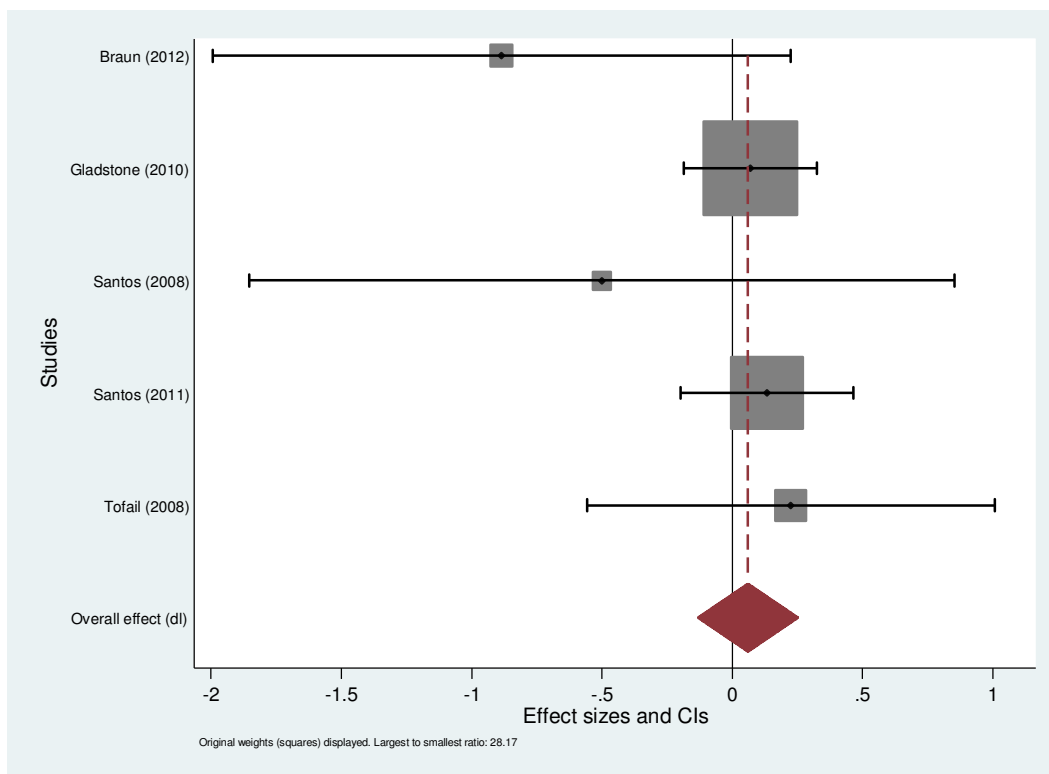

**Figure 46: Association between maternal ages < 15 (reference: ages 20-34) and cognitive development.**

1  
2  
3  
4  
5  
6  
7  
8  
9  
10  
11  
12  
13  
14  
15  
16  
17  
18  
19  
20  
21  
22  
23  
24  
25  
26  
27  
28  
29  
30  
31  
32  
33  
34  
35  
36  
37  
38  
39  
40  
41  
42  
43  
44  
45  
46  
47  
48  
49  
50  
51  
52  
53  
54  
55  
56  
57  
58  
59  
60

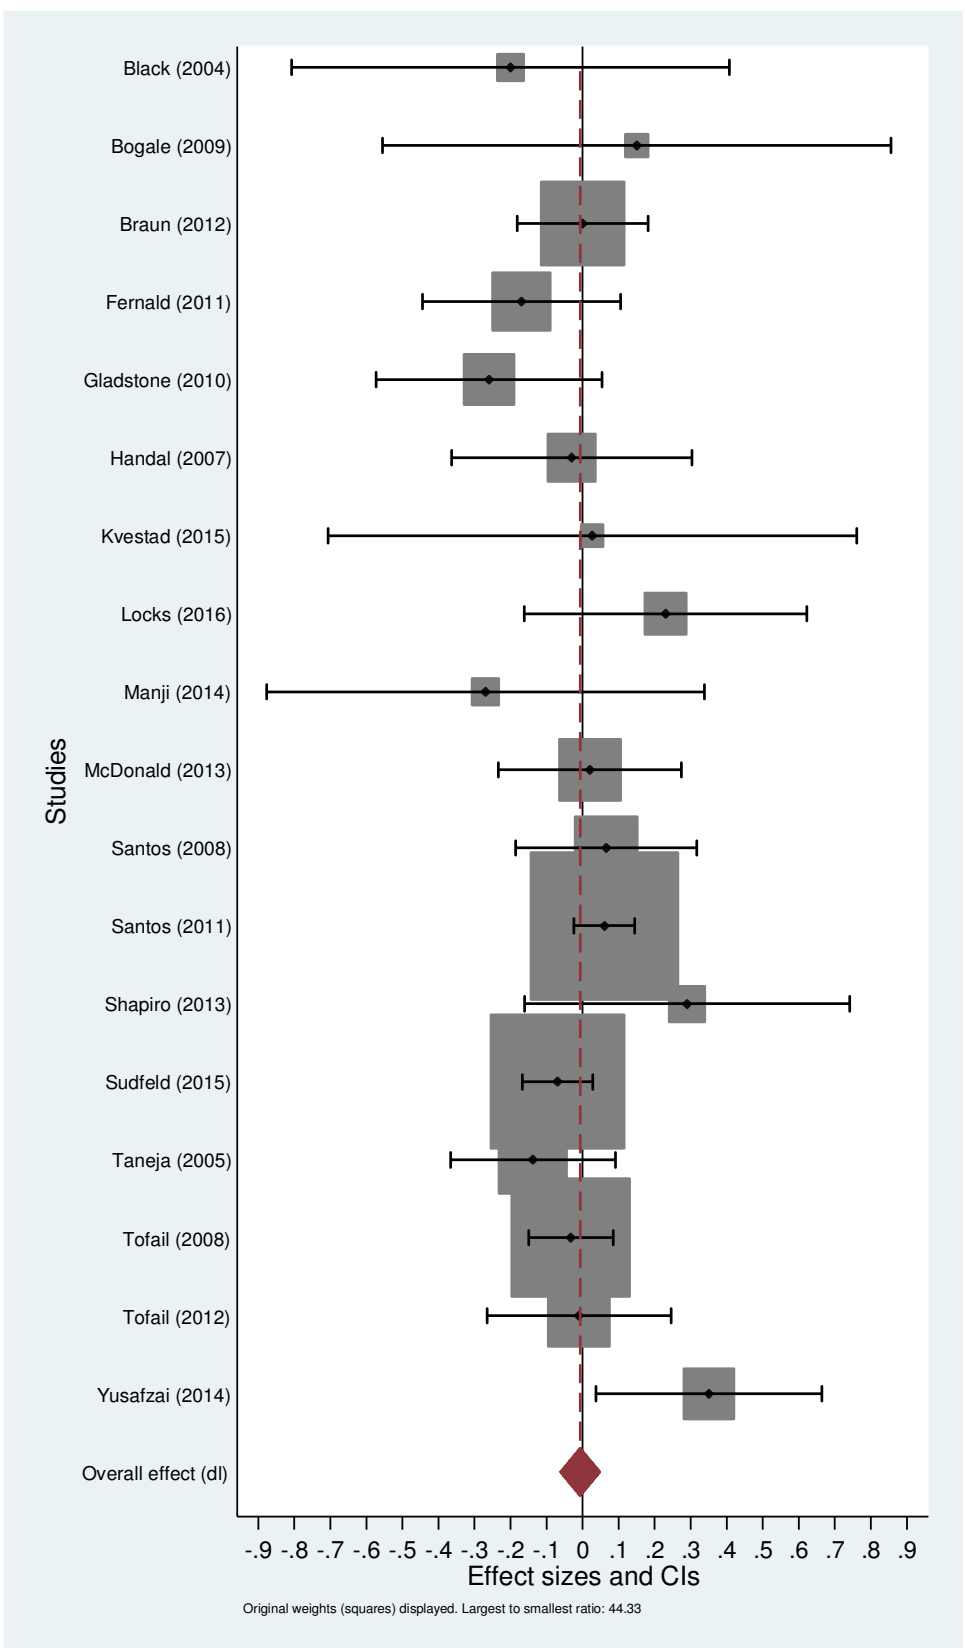

Figure 47: Association between maternal ages 15-20 (reference: ages 20-34) and cognitive development.

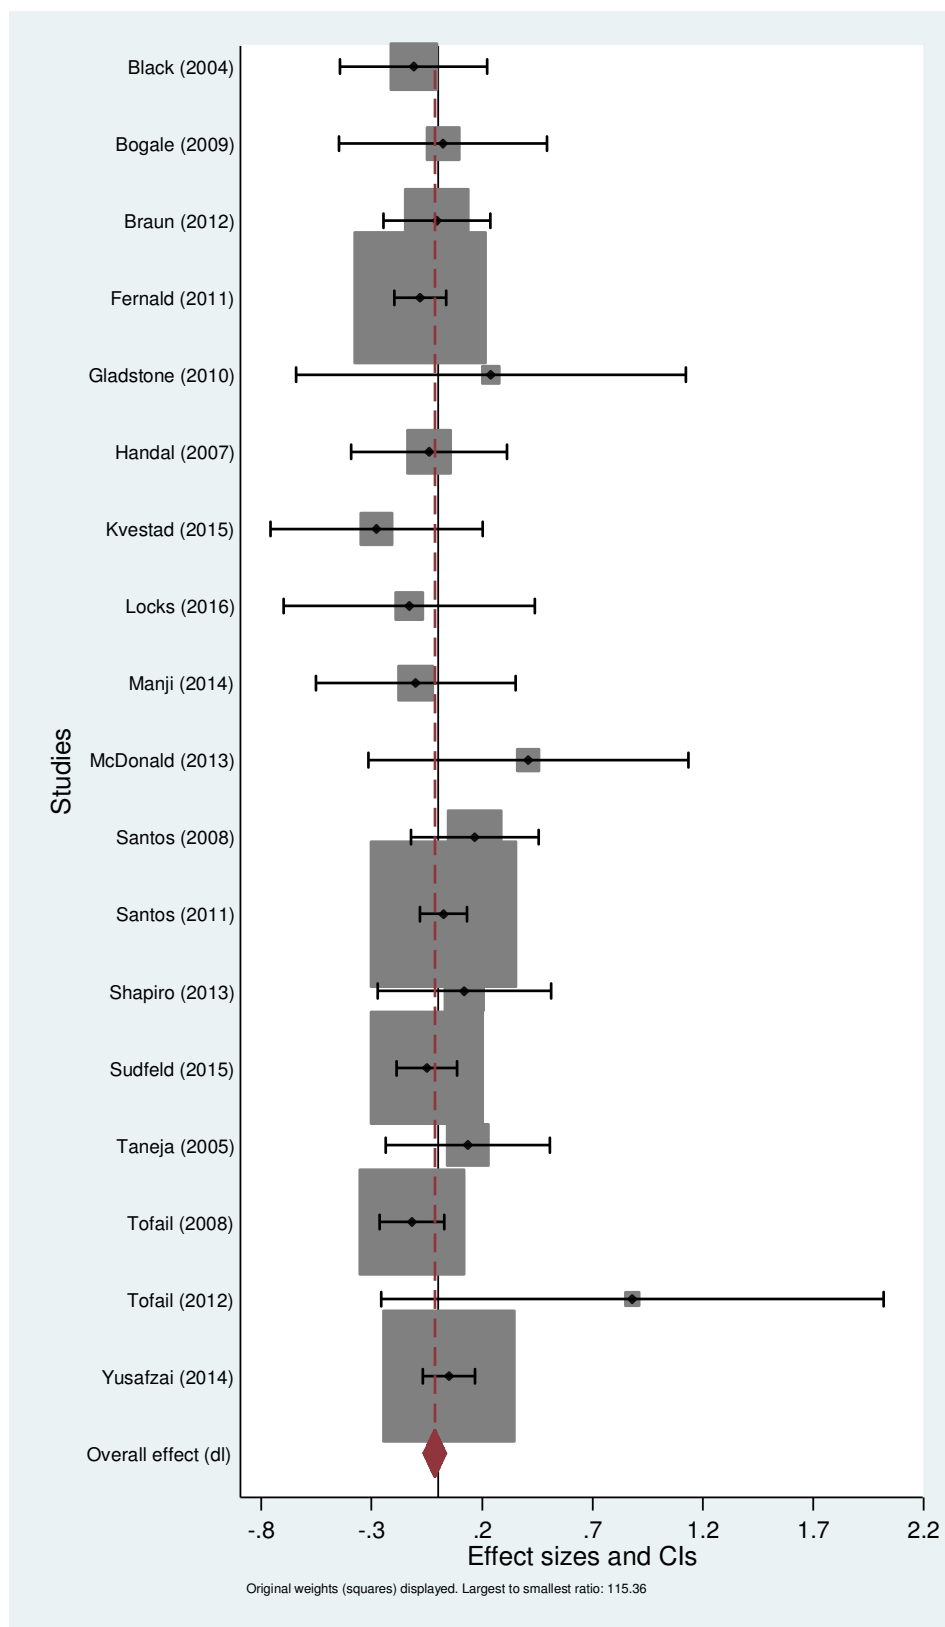

Figure 48: Association between maternal ages >35 (reference: ages 20-34) and cognitive development.

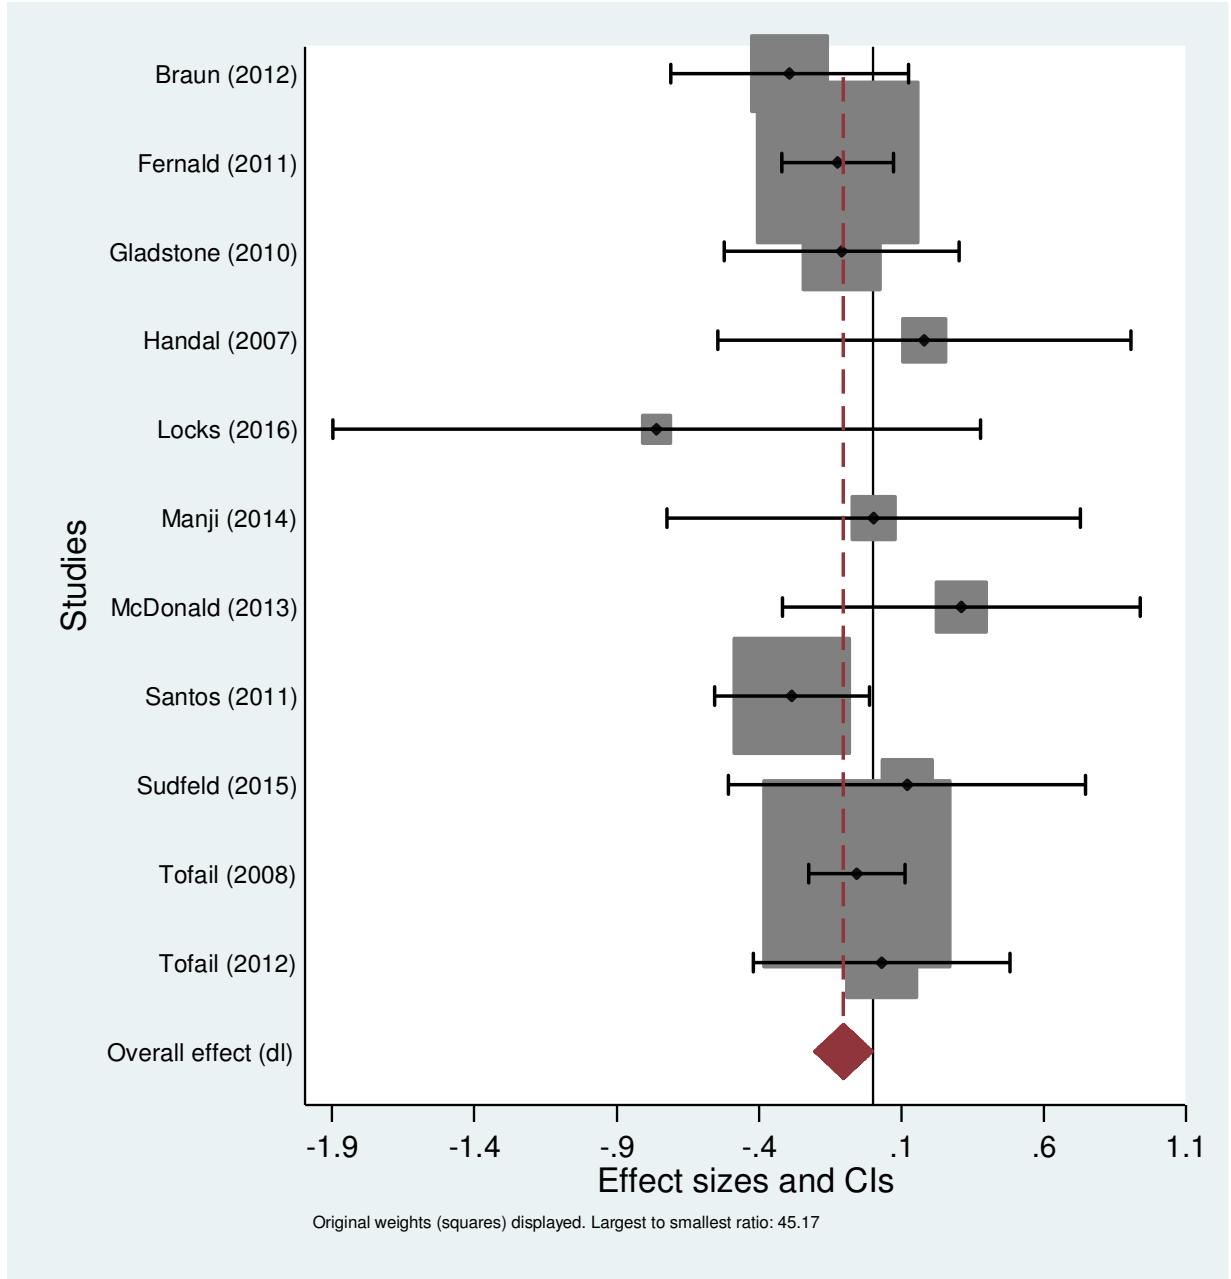

**Figure 49: Association between maternal height < 145cm (reference: >155 cm) and cognitive development.**



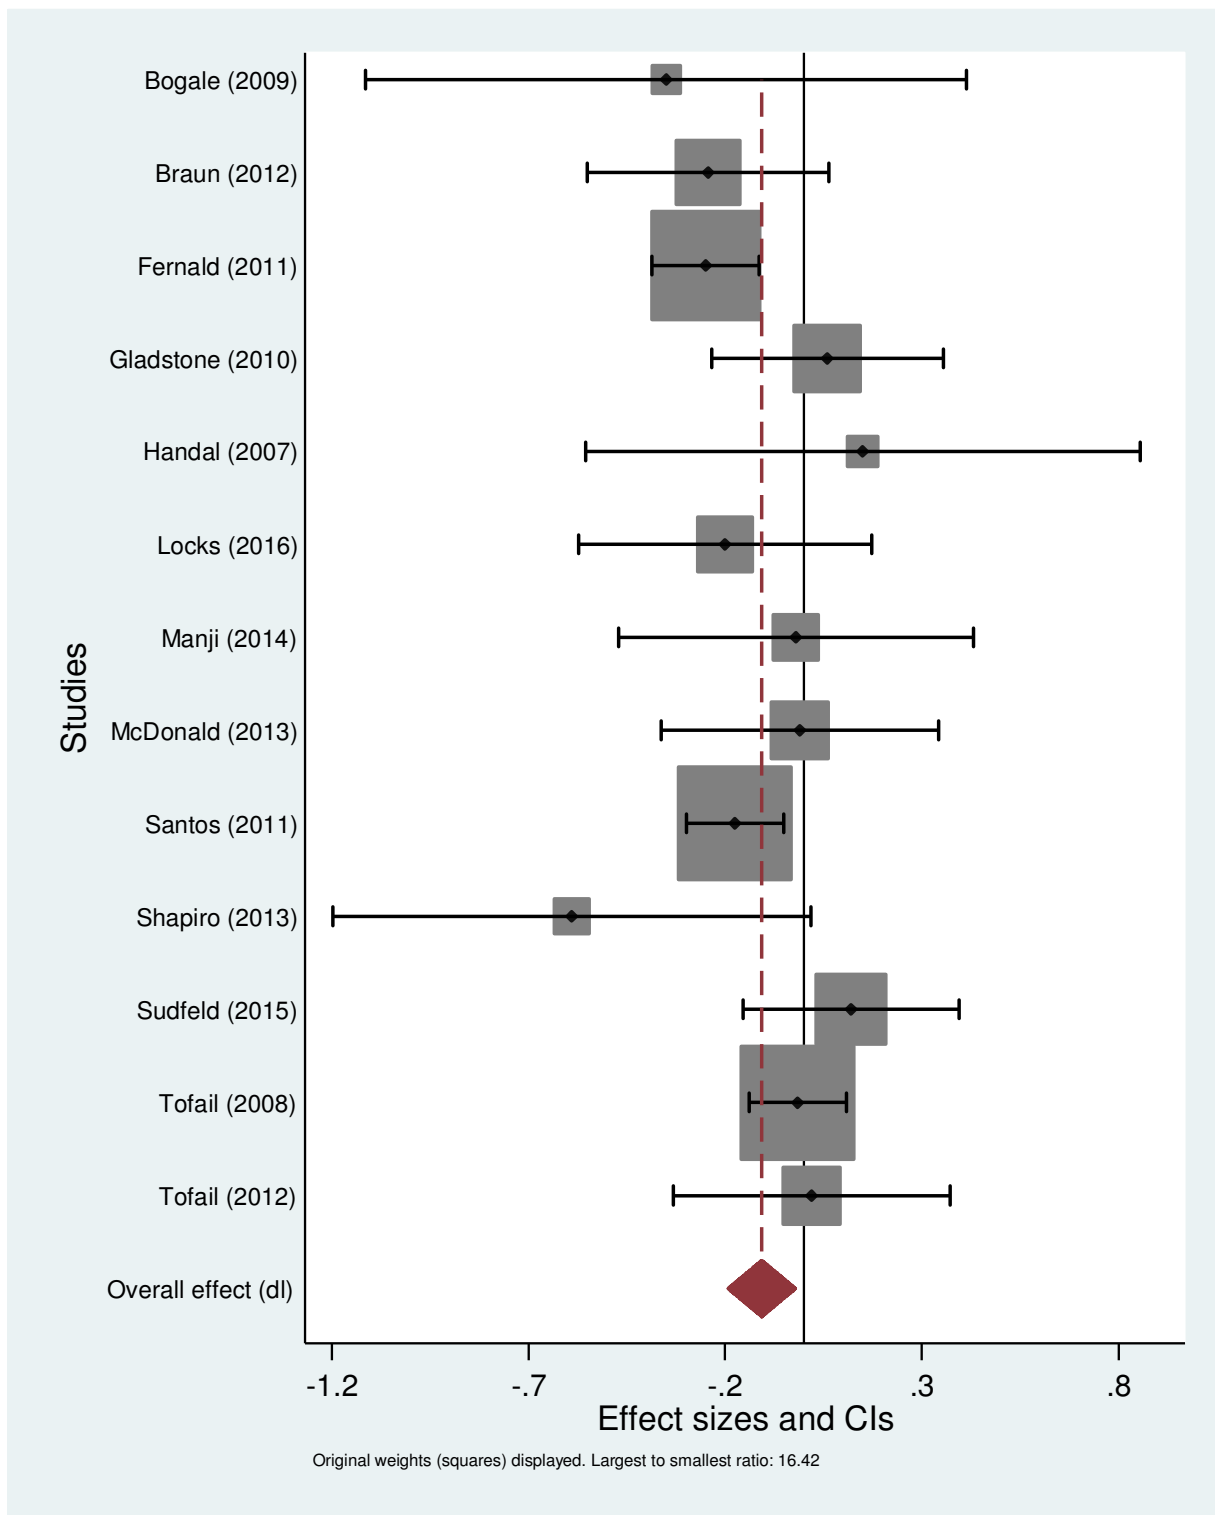

Figure 50: Association between maternal height 145-150cm (reference: >155 cm) and cognitive development.

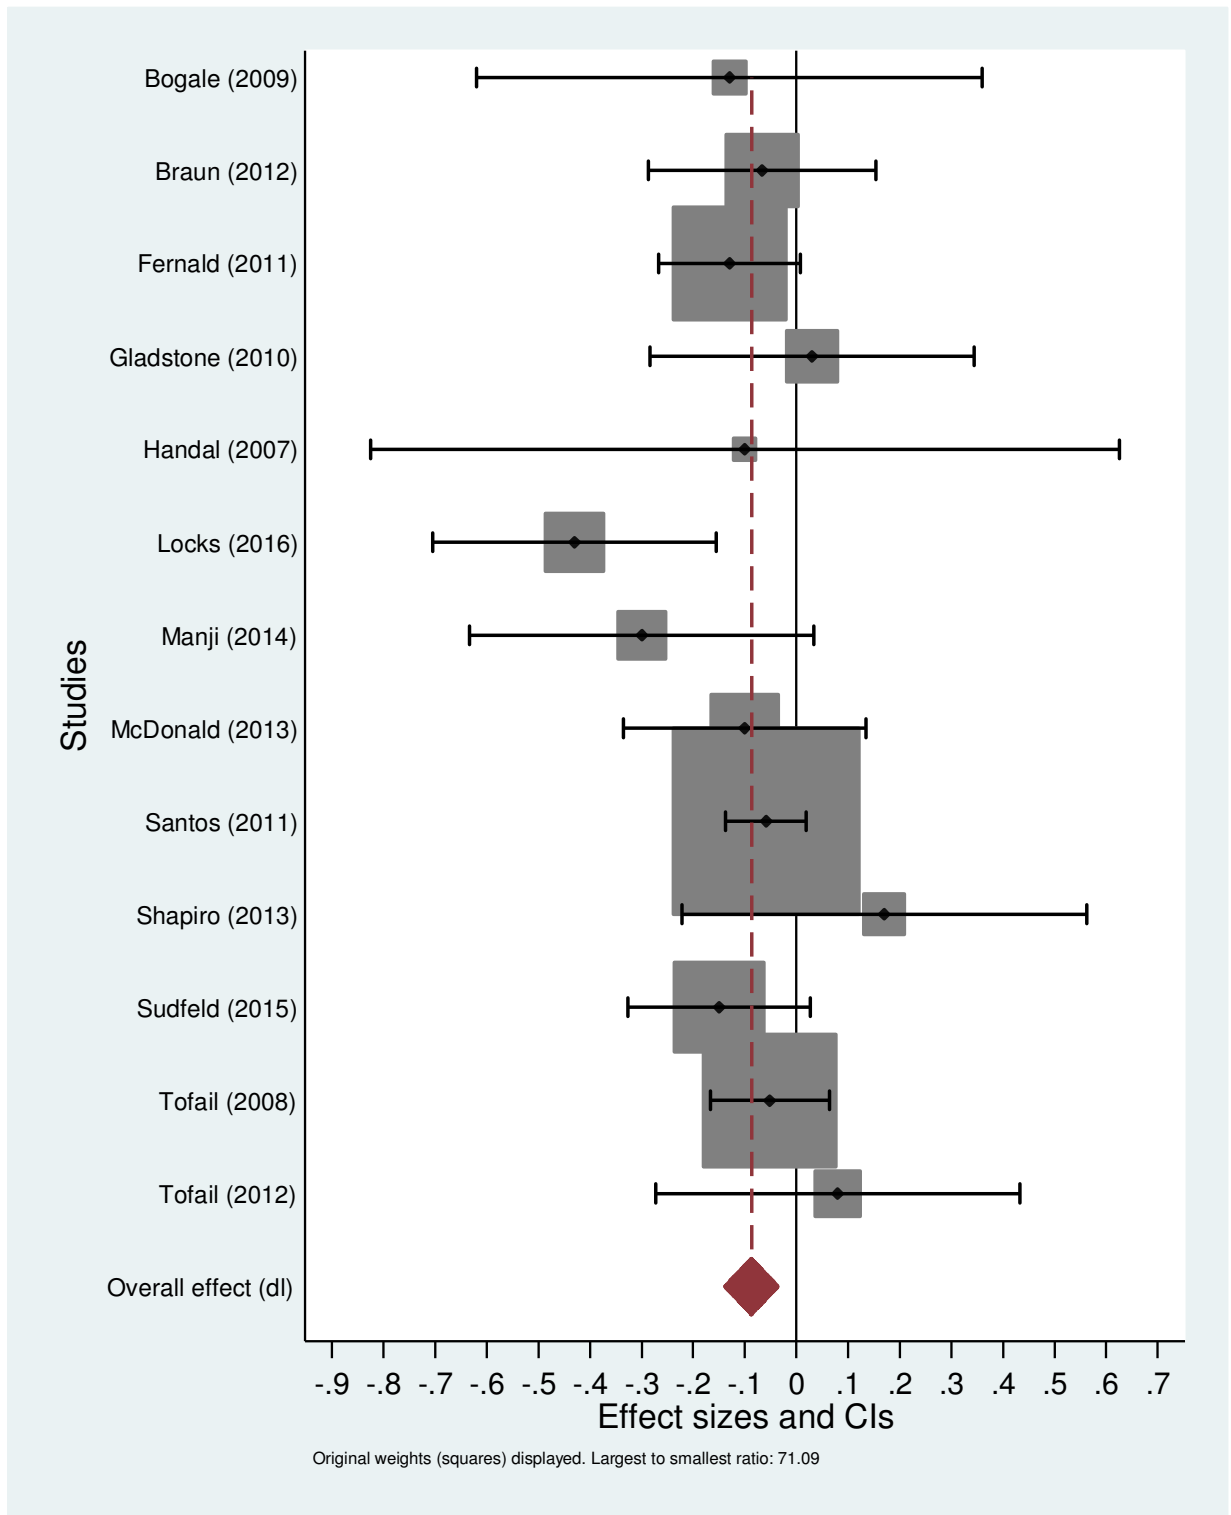

**Figure 51: Association between maternal height 150-155 cm (reference: >155 cm) and cognitive development.**

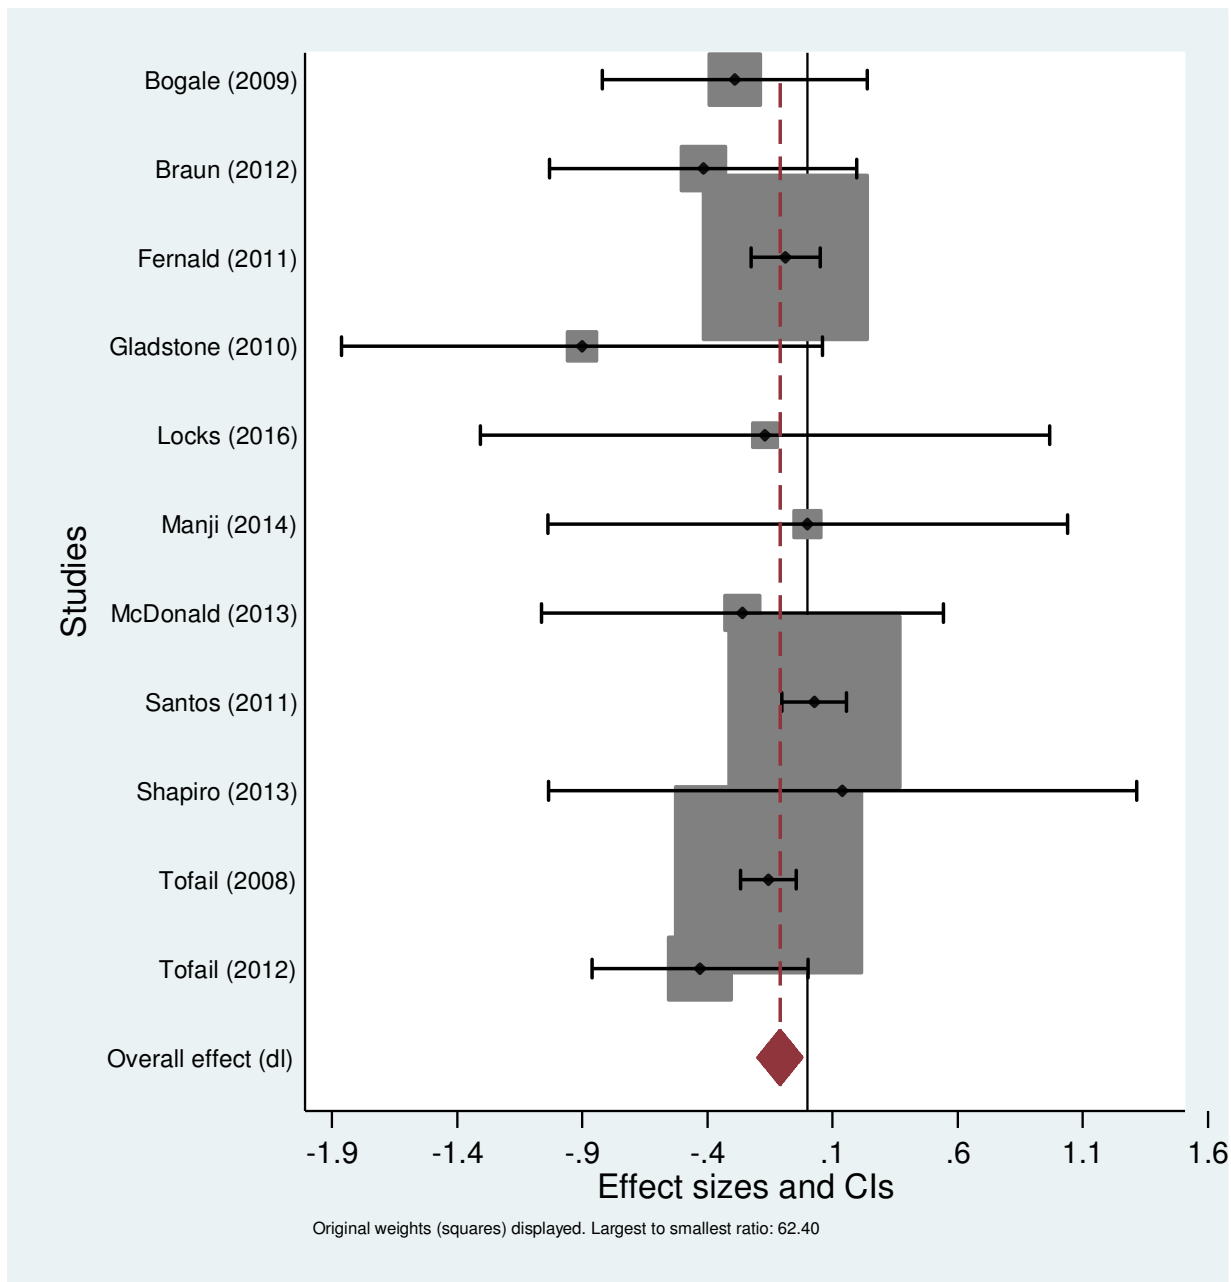

**Figure 52: Association between maternal BMI <18.5 kg/m<sup>2</sup> (reference: 18.5-25) and cognitive development.**

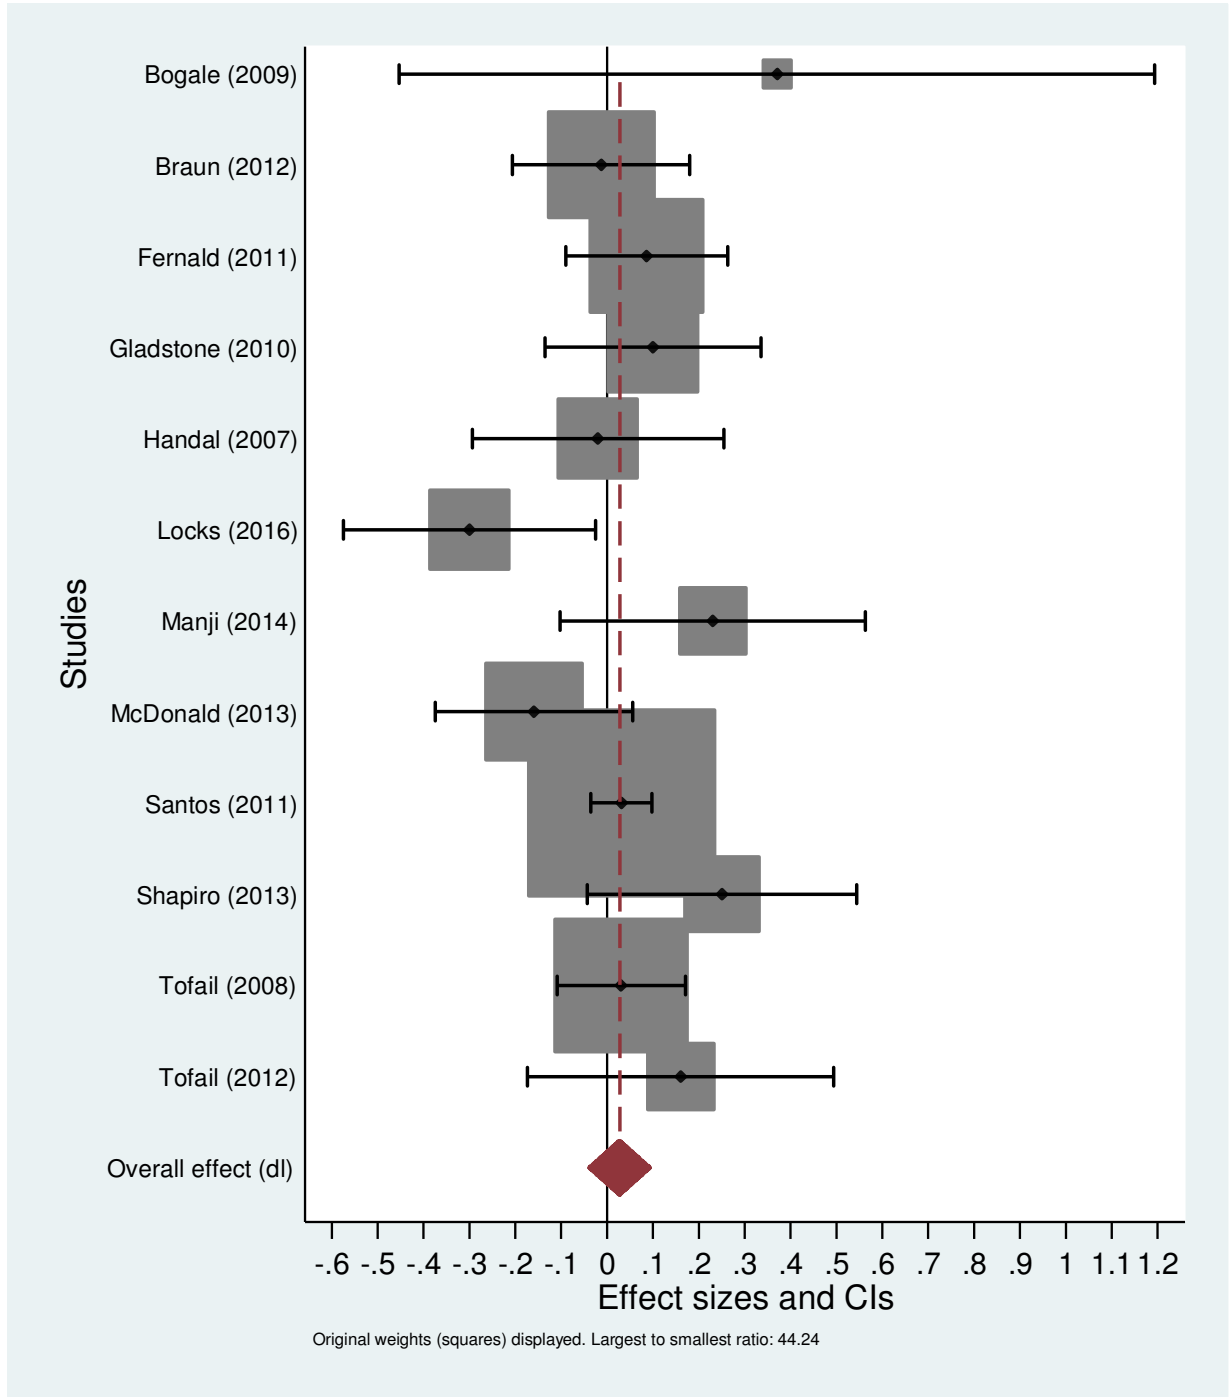

Figure 53: Association between maternal BMI 25-30 kg/m<sup>2</sup> (reference: 18.5-25) and cognitive development.



**Figure 54: Association between maternal BMI >30 kg/m<sup>2</sup> (reference: 18.5-25) and cognitive development.**

1  
2  
3  
4  
5  
6  
7  
8  
9  
10  
11  
12  
13  
14  
15  
16  
17  
18  
19  
20  
21  
22  
23  
24  
25  
26  
27  
28  
29  
30  
31  
32  
33  
34  
35  
36  
37  
38  
39  
40  
41  
42  
43  
44  
45  
46  
47  
48  
49  
50  
51  
52  
53  
54  
55  
56  
57  
58  
59  
60

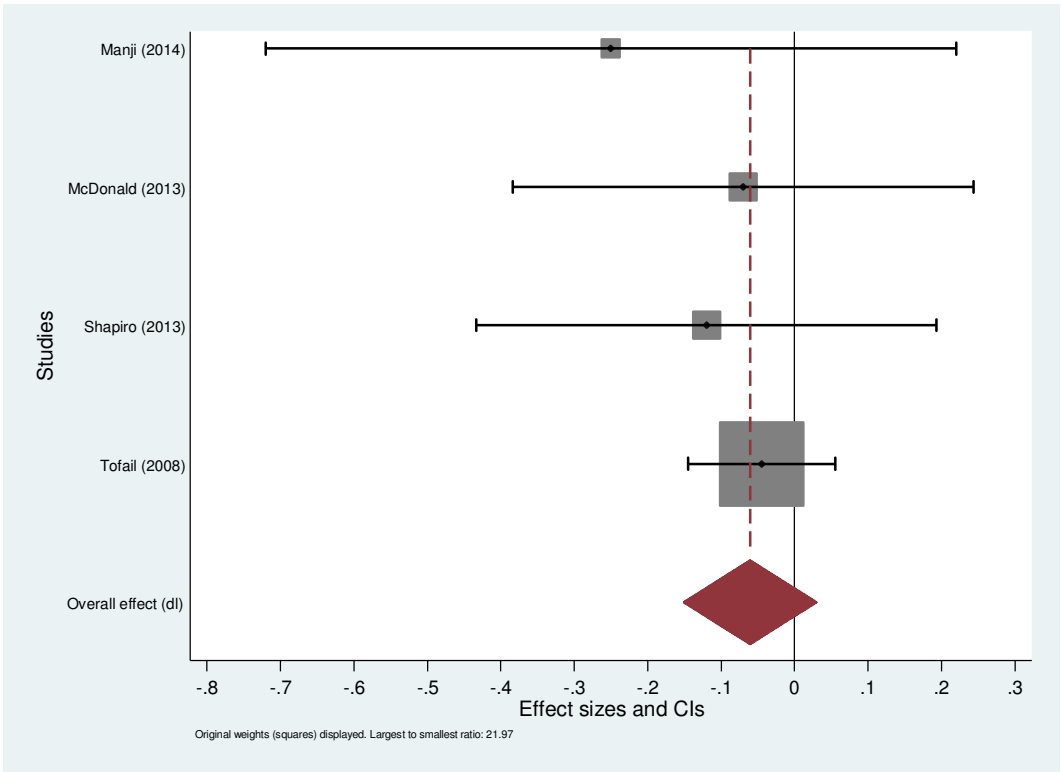

Figure 55: Association between mild anemia in pregnancy (reference: no anemia) and cognitive development.

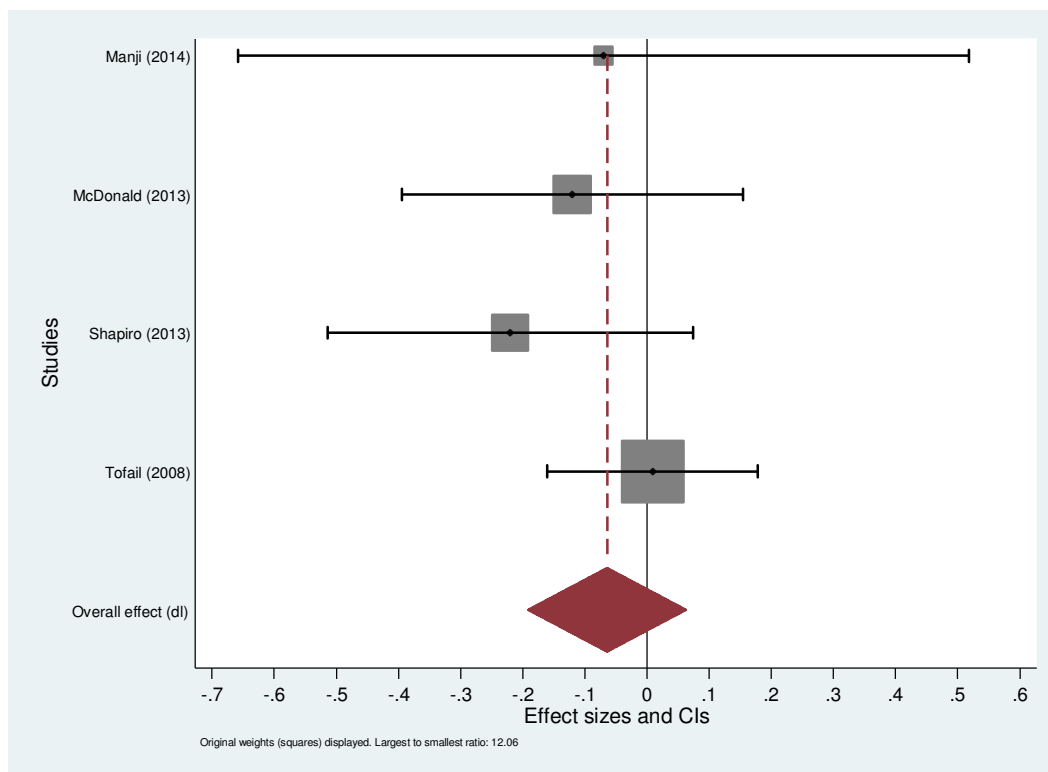

Figure 56: Association between maternal moderate anemia (reference: no anemia) and cognitive development.

### 5. Parental Risk Factors on Child's Motor Development

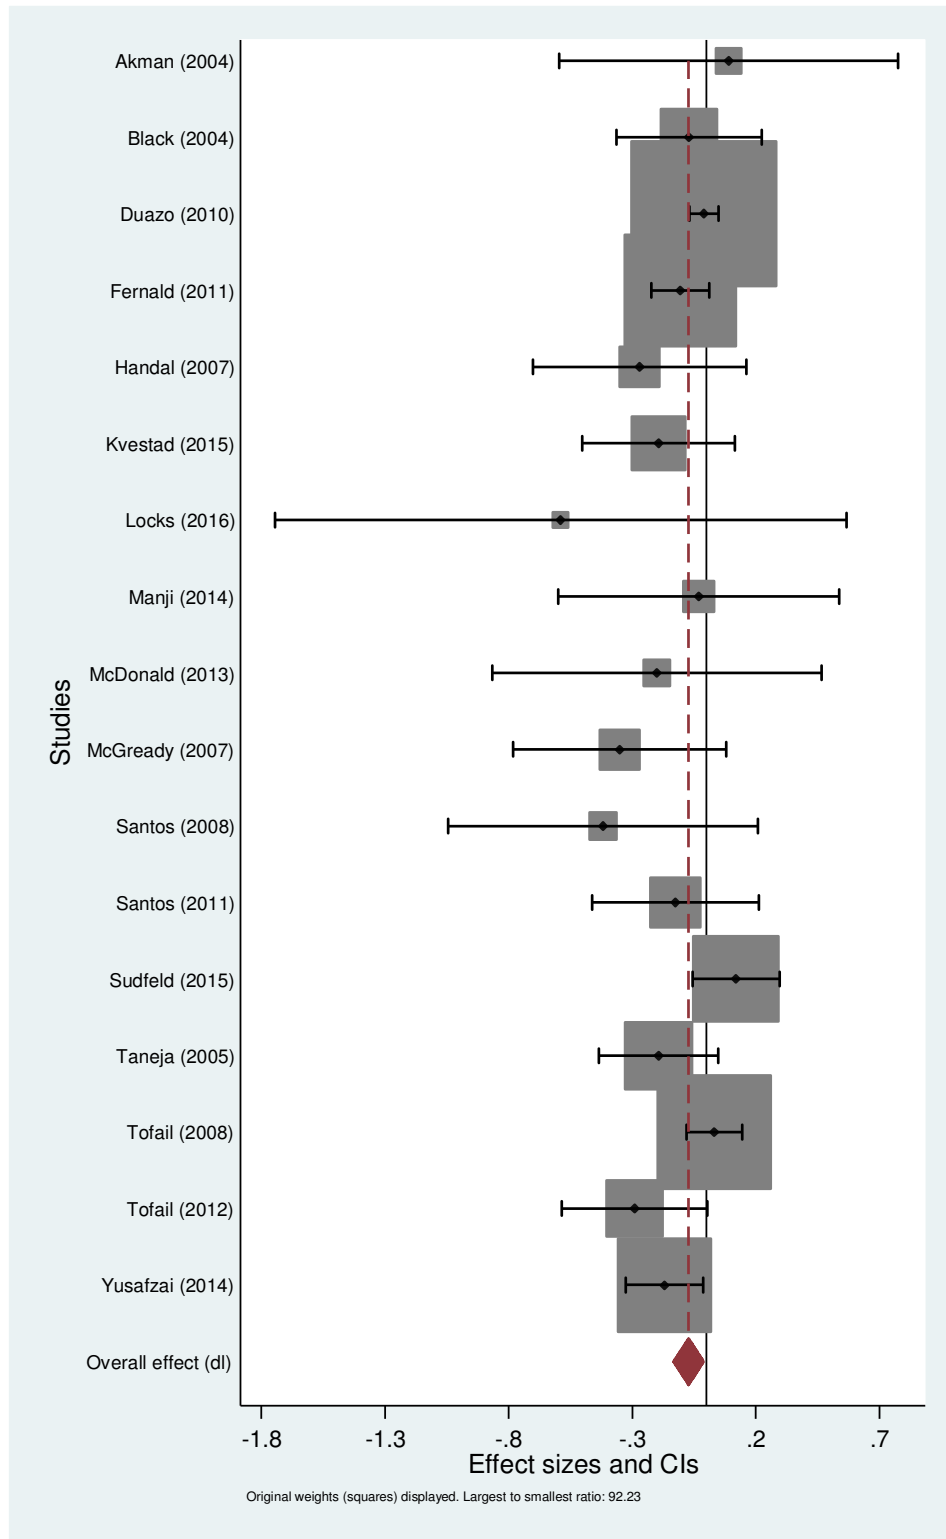

Figure 57: Association between no maternal education (reference: primary education) and motor development.



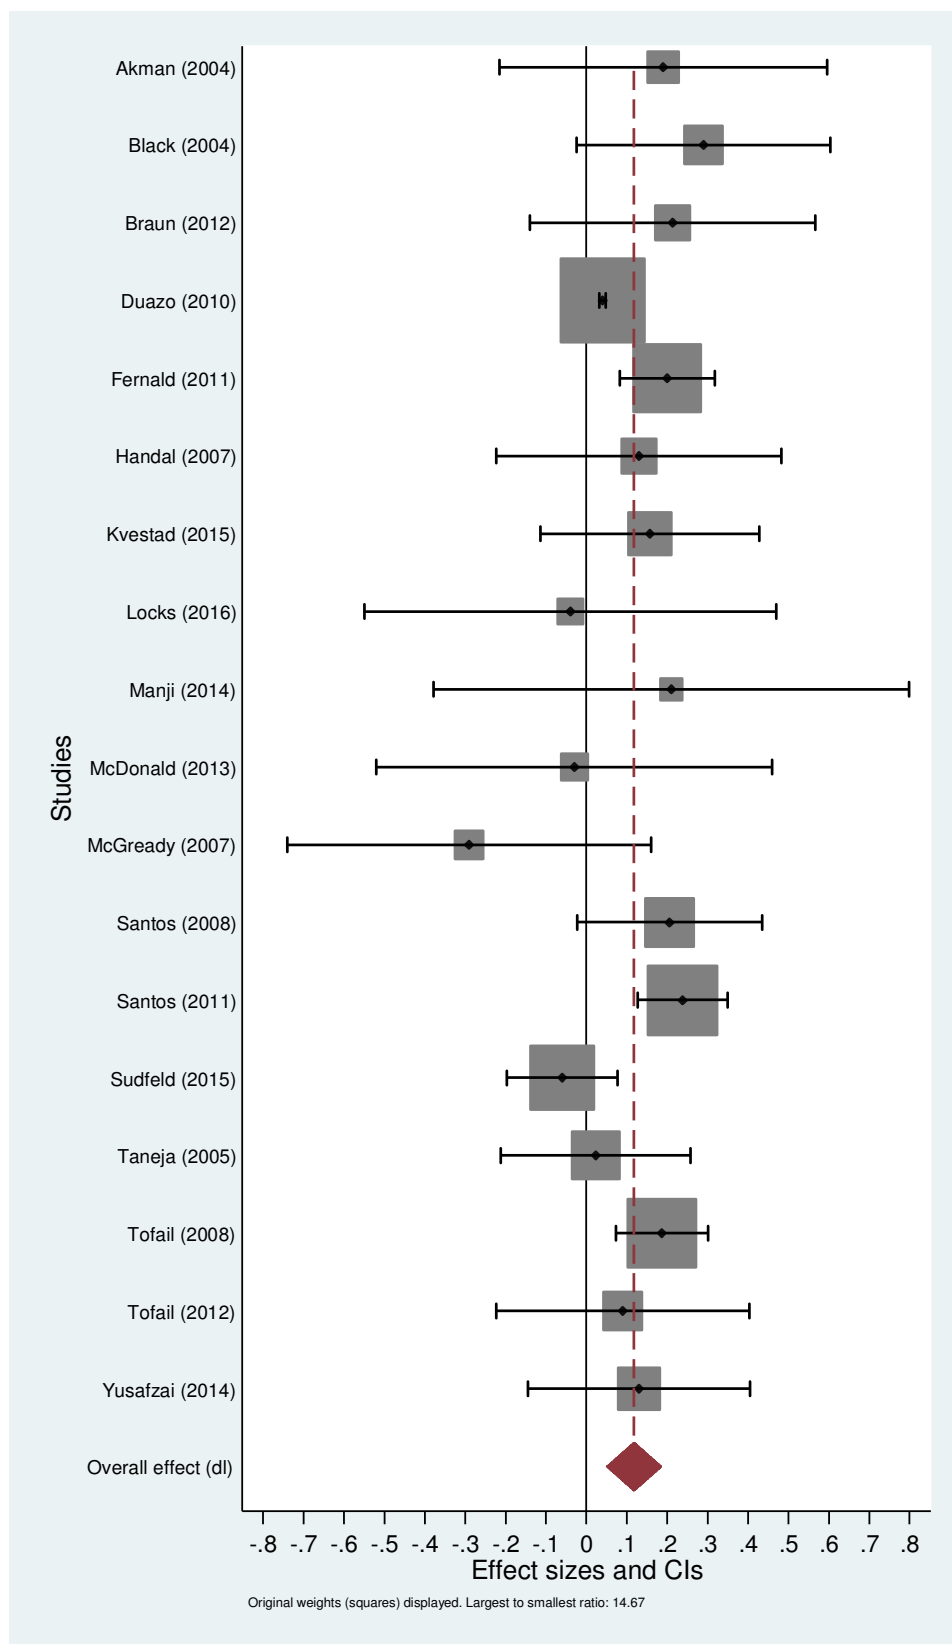

Figure 58: Association between maternal secondary education (reference: primary education) and motor development.

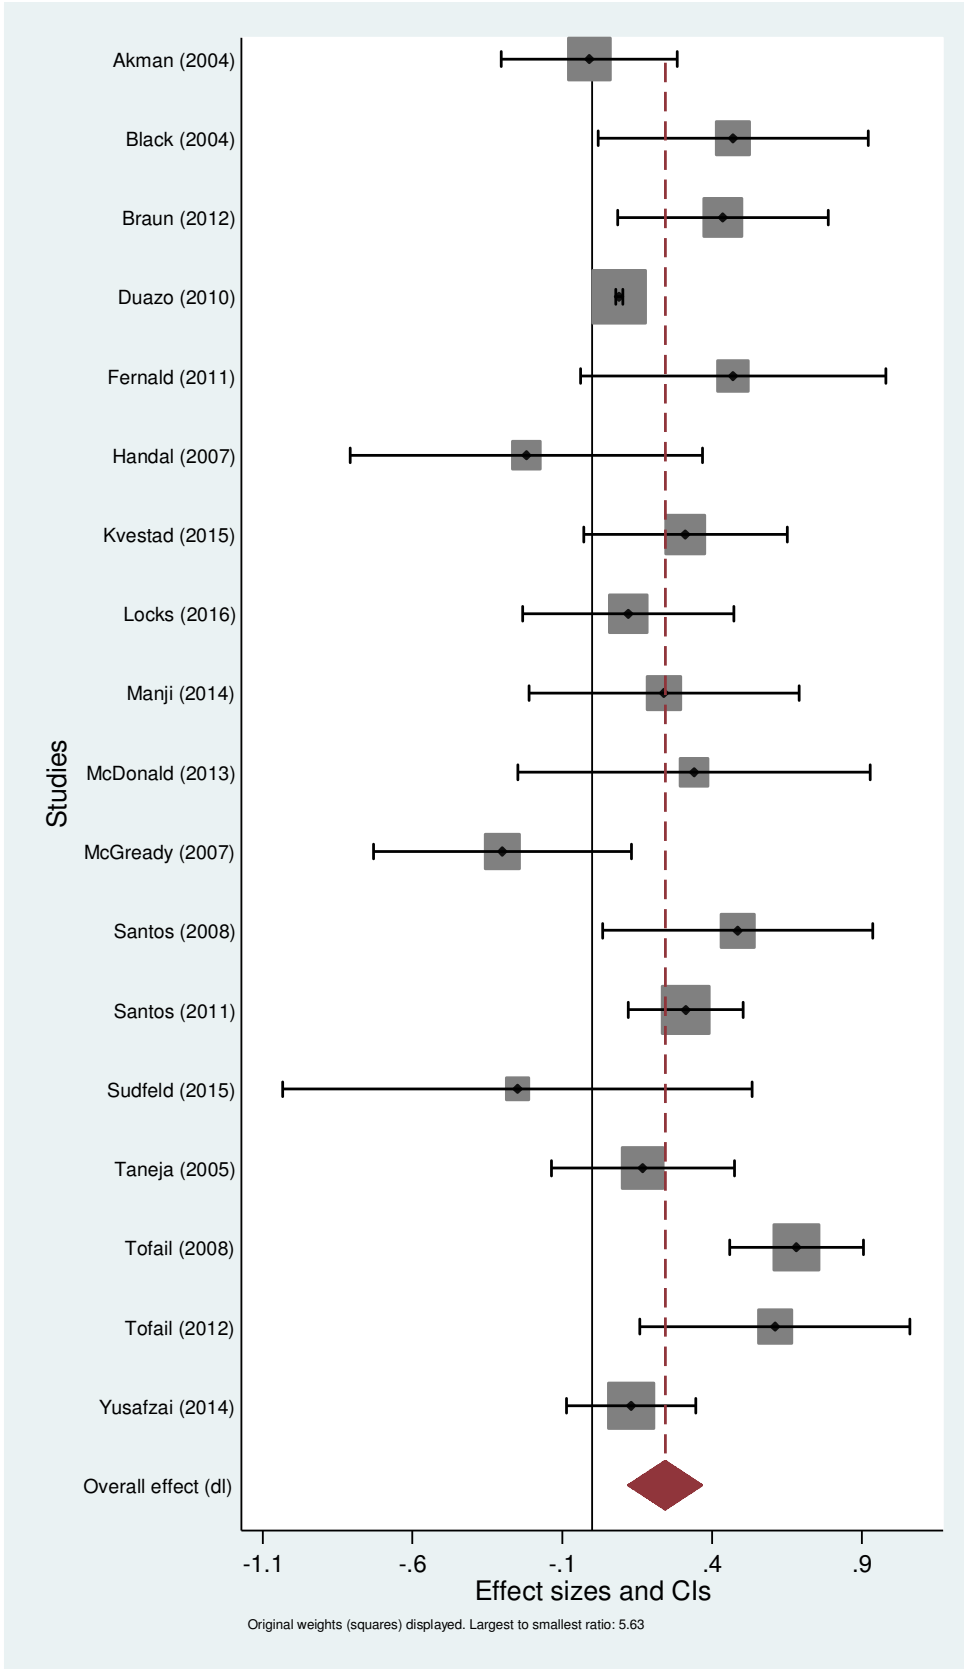

Figure 59: Association between maternal higher education (reference: primary education) and motor development.

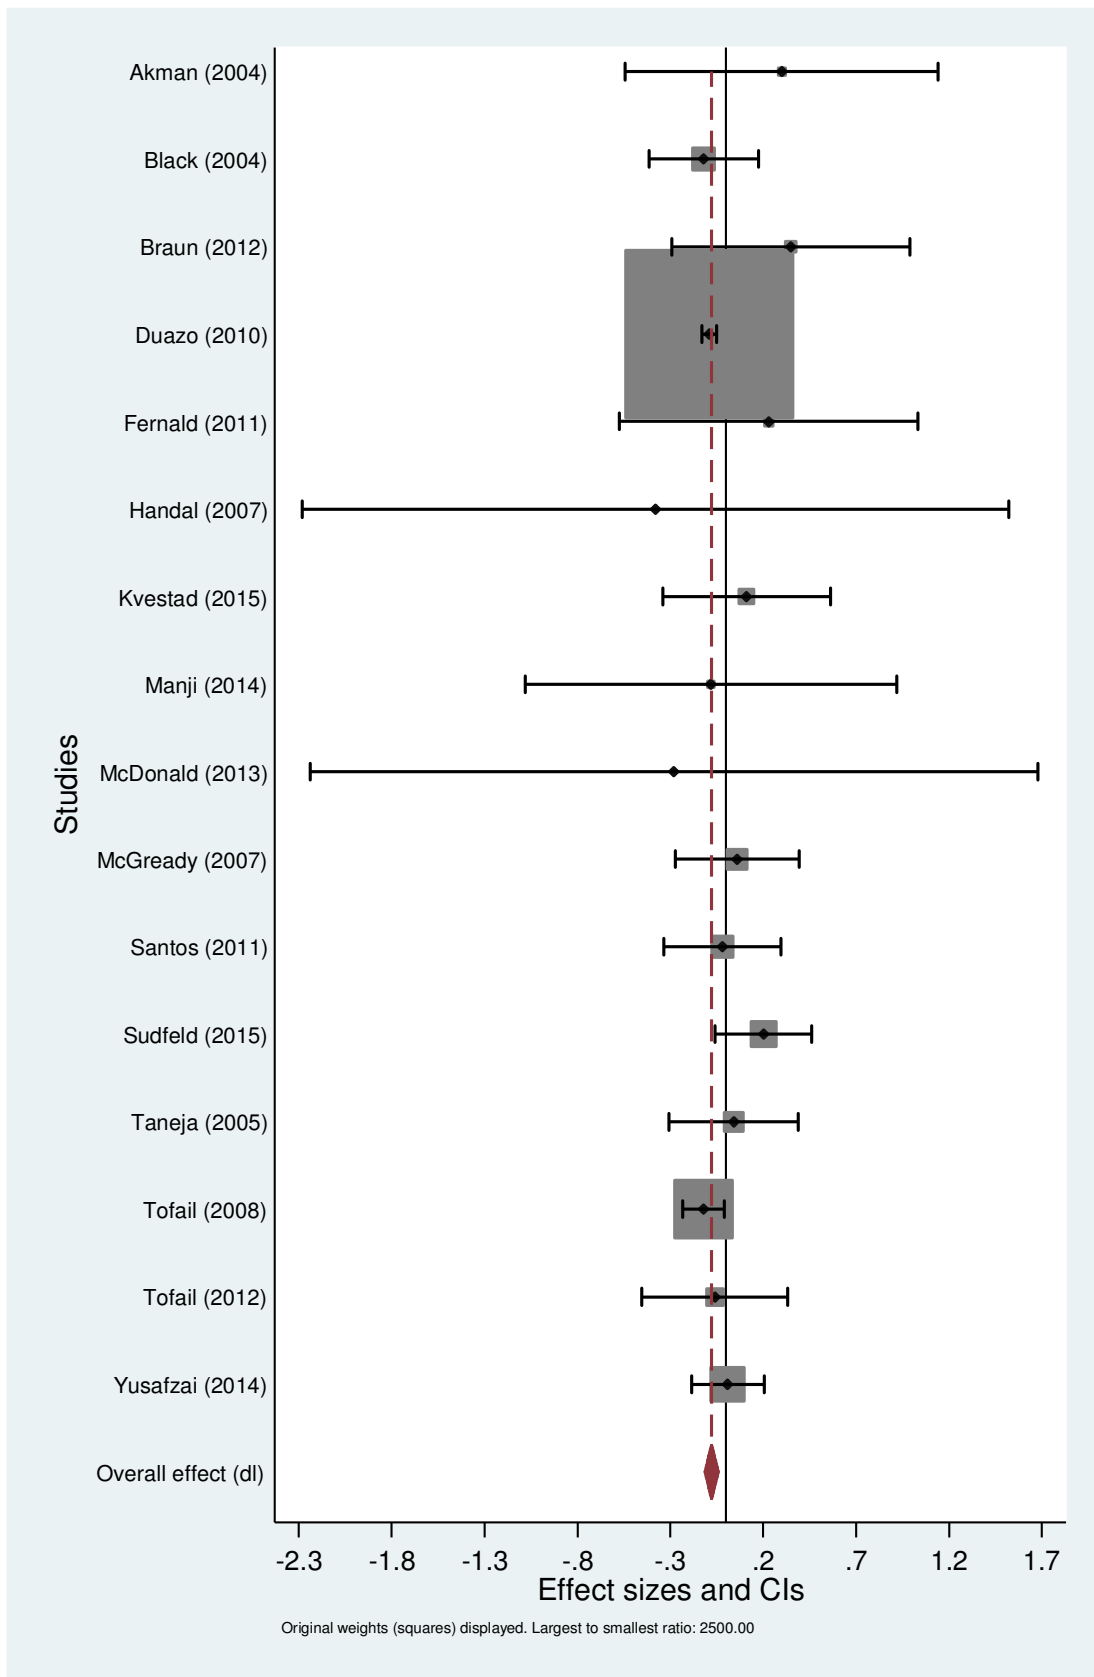

Figure 60: Association between no paternal education (reference: primary education) and motor development.

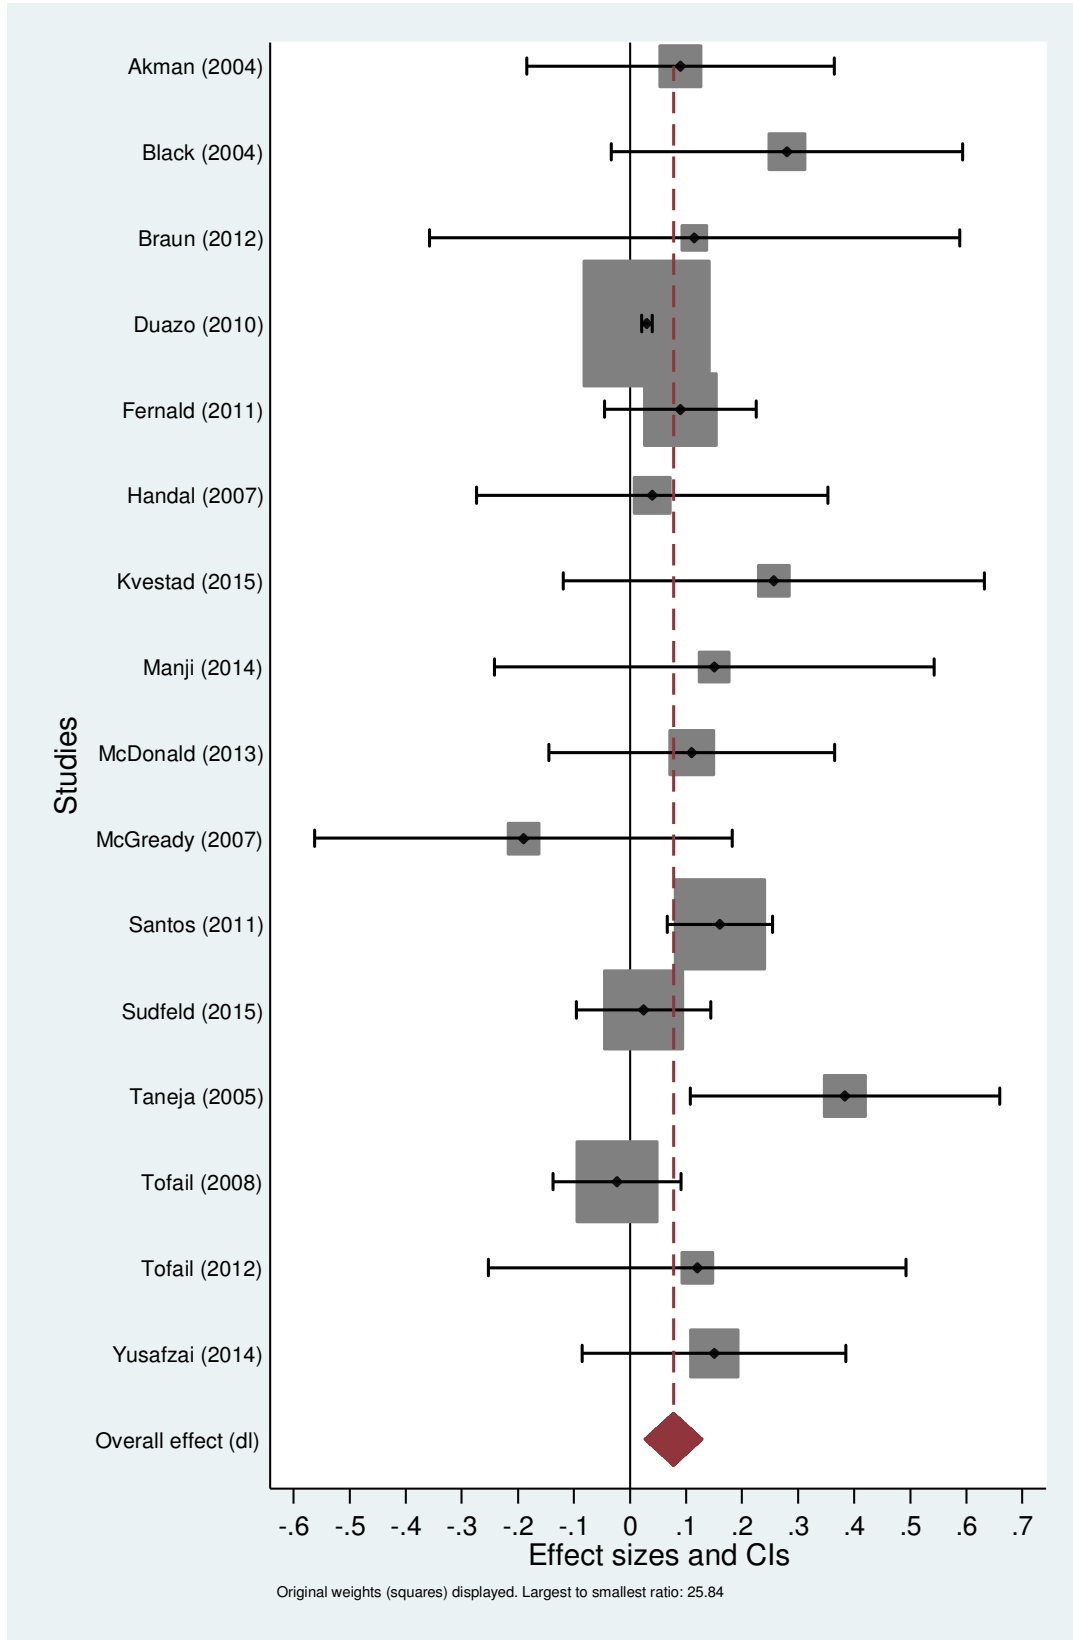

Figure 61: Association between paternal secondary education (reference: primary education) and motor development.

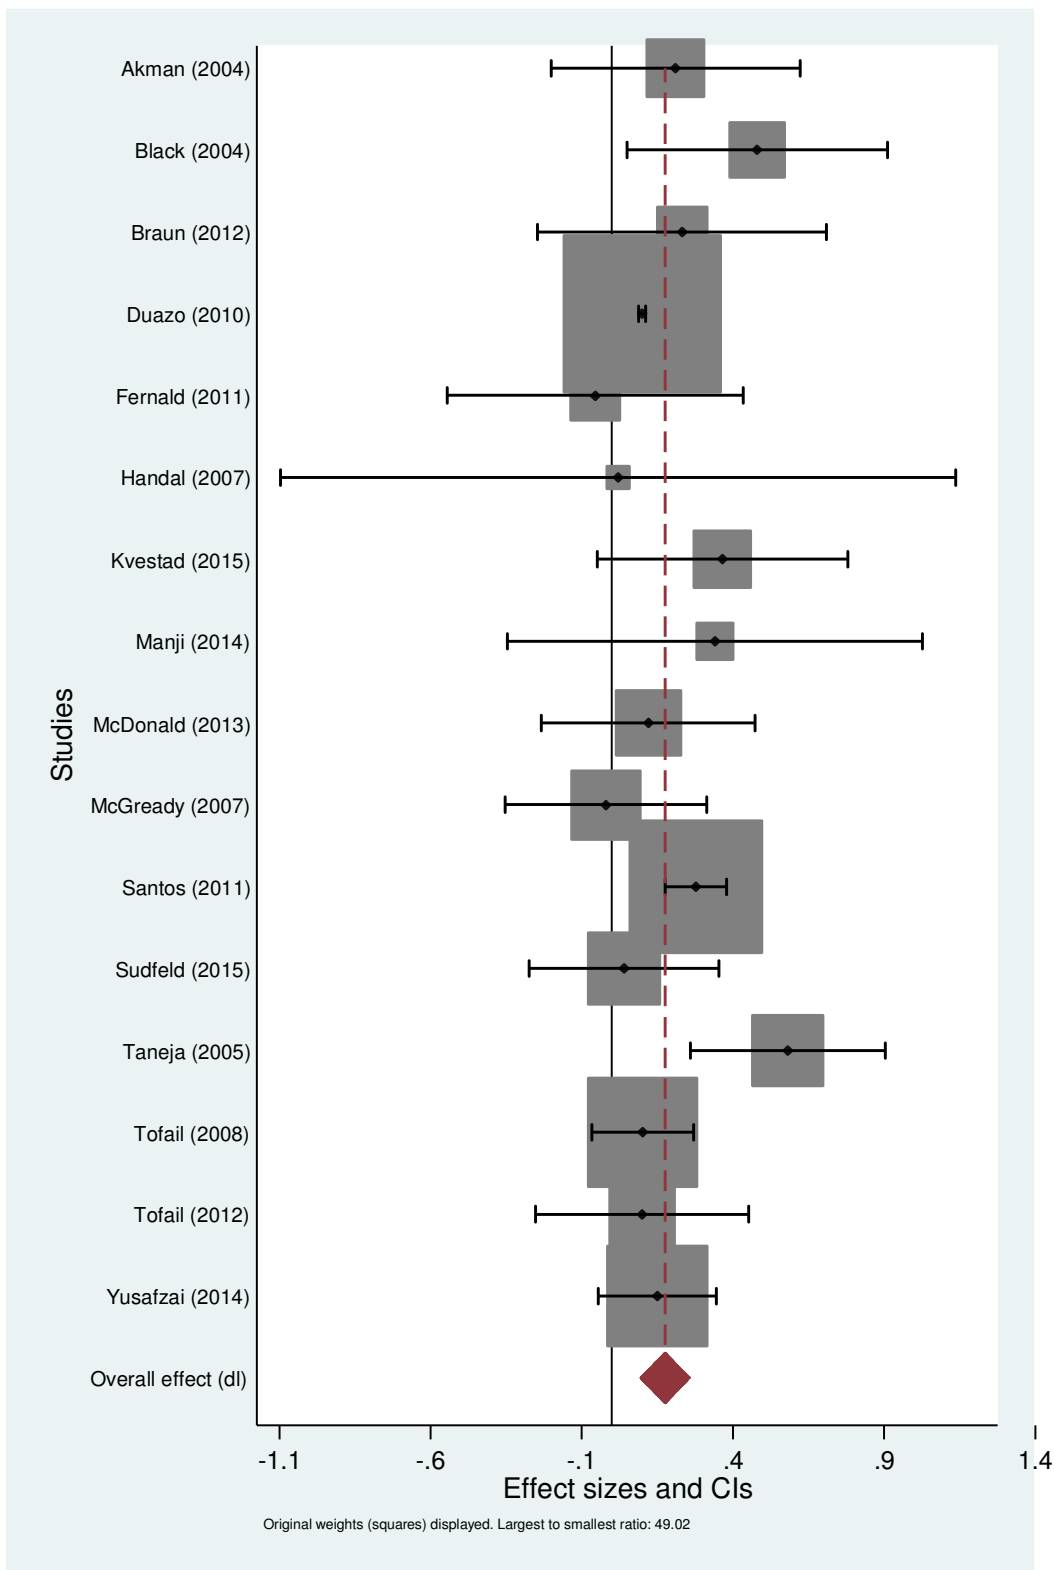

Figure 62: Association between paternal higher education (reference: primary education) and motor development.

1  
2  
3  
4  
5  
6  
7  
8  
9  
10  
11  
12  
13  
14  
15  
16  
17  
18  
19  
20  
21  
22  
23  
24  
25  
26  
27  
28  
29  
30  
31  
32  
33  
34  
35  
36  
37  
38  
39  
40  
41  
42  
43  
44  
45  
46  
47  
48  
49  
50  
51  
52  
53  
54  
55  
56  
57  
58  
59  
60

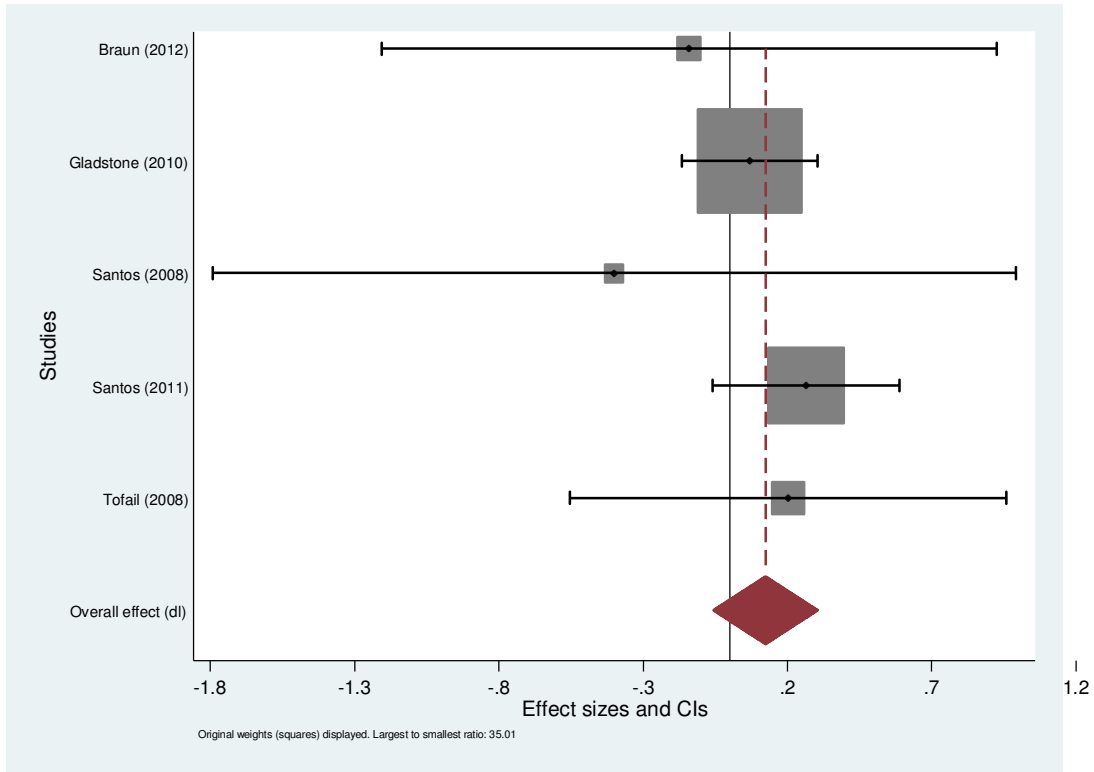

**Figure 63: Association between maternal ages < 15 (reference: ages 20-34) and motor development.**

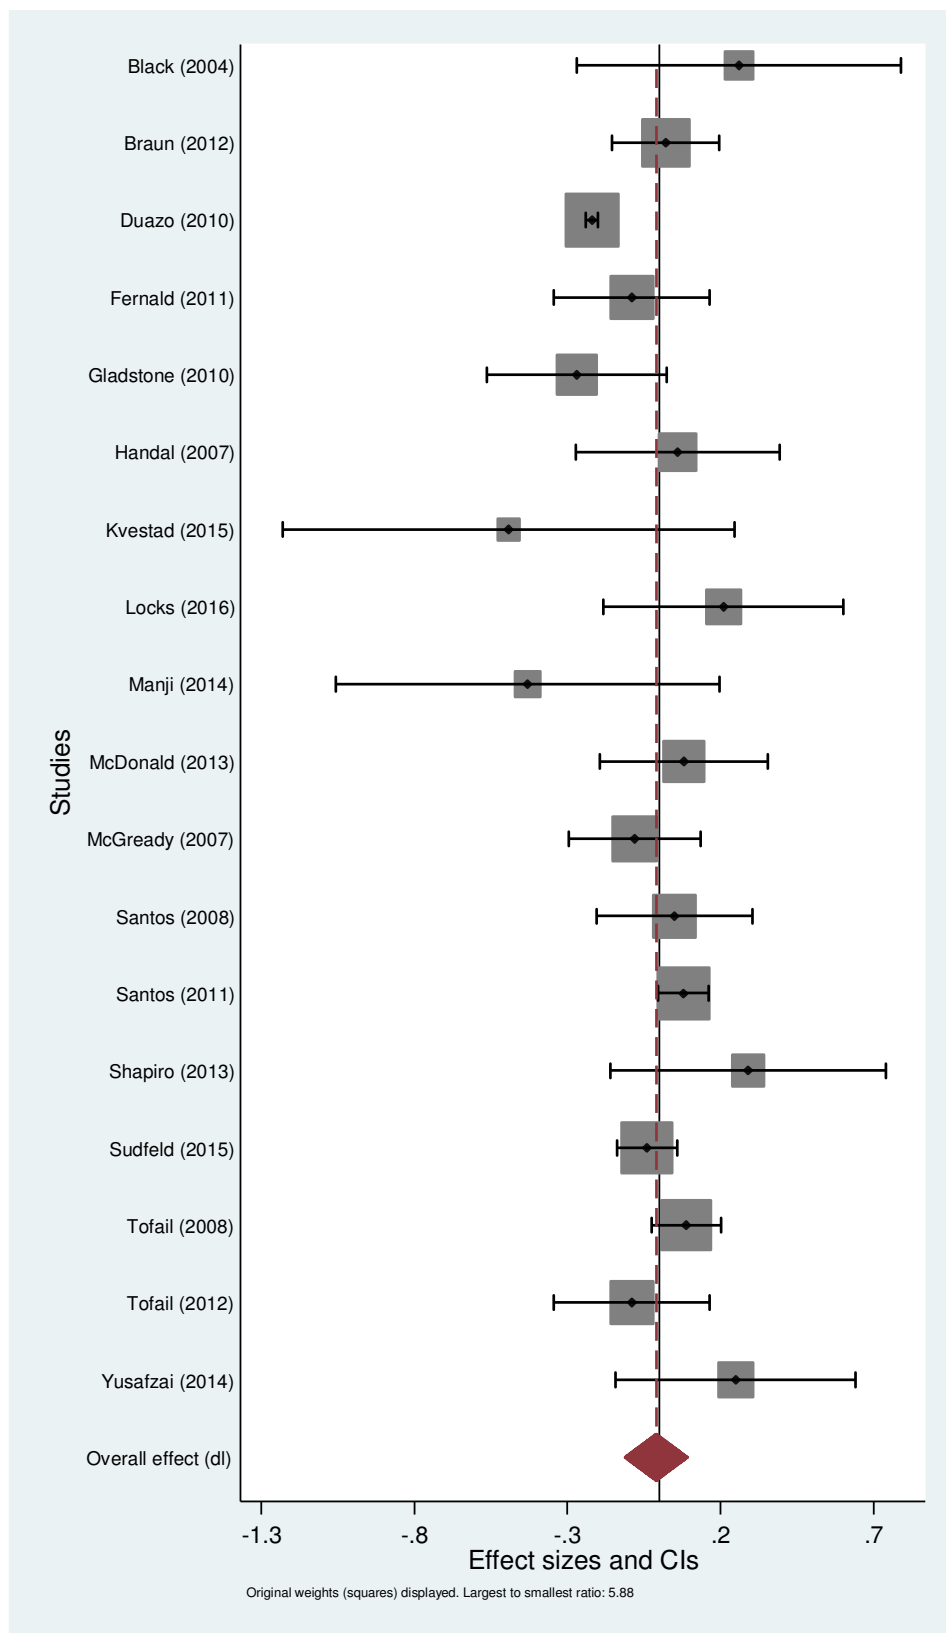

Figure 64: Association between maternal ages 15-20 (reference: ages 20-34) and motor development.

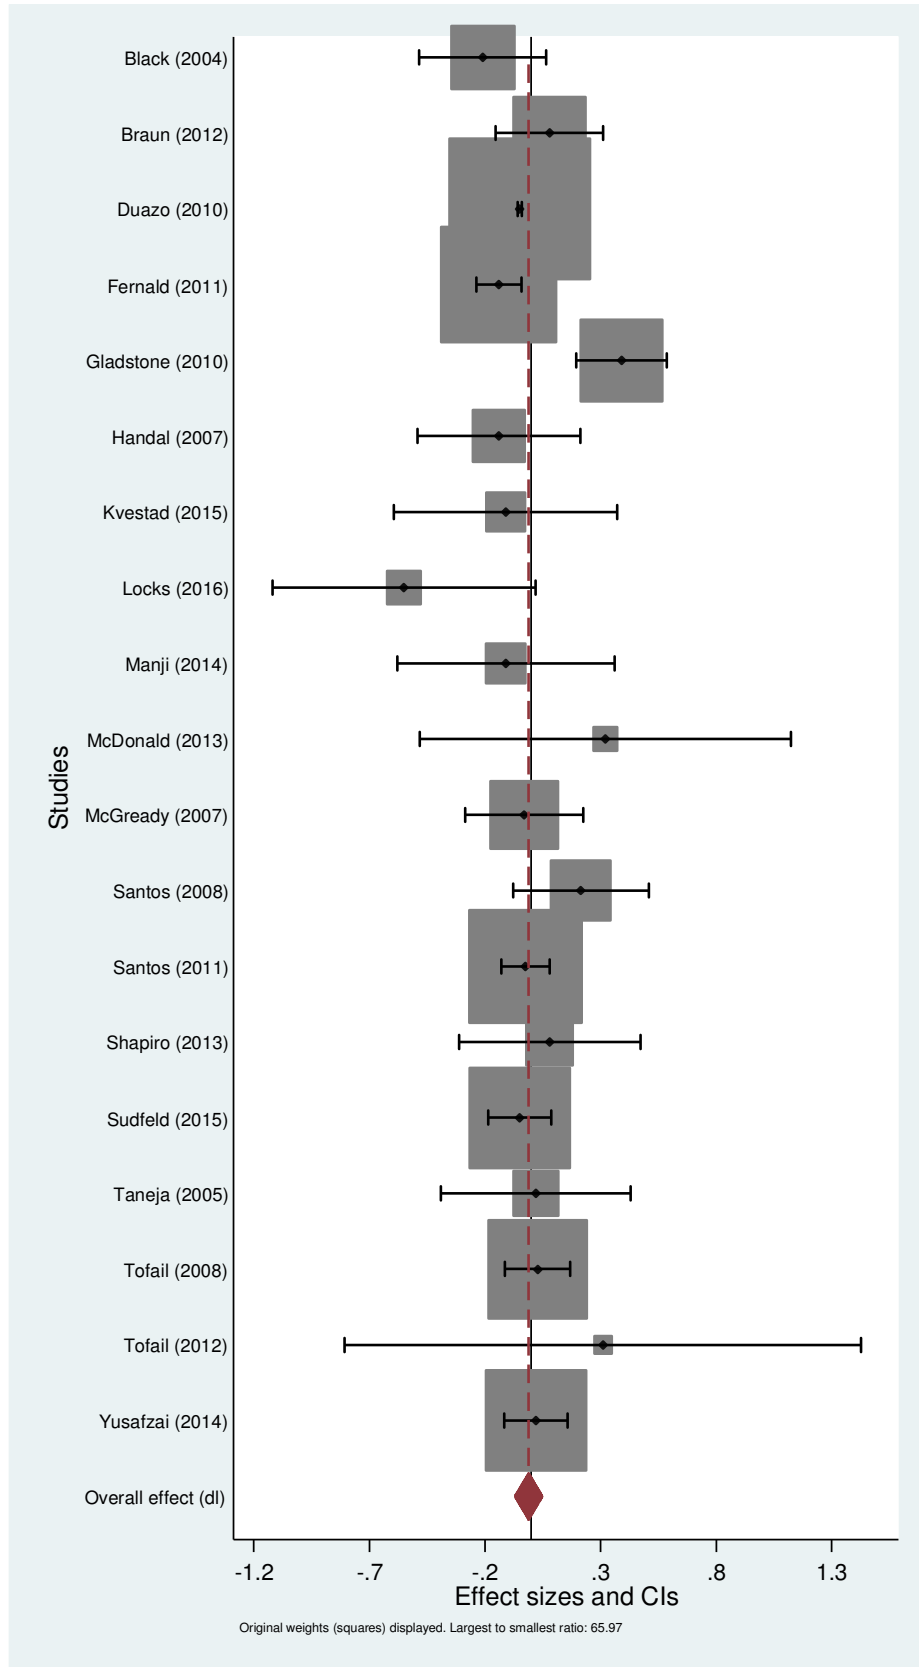

Figure 65: Association between maternal ages >35 (reference: ages 20-34) and motor development.





**Figure 66: Association between maternal height <145 (reference: >155 cm) and motor development.**

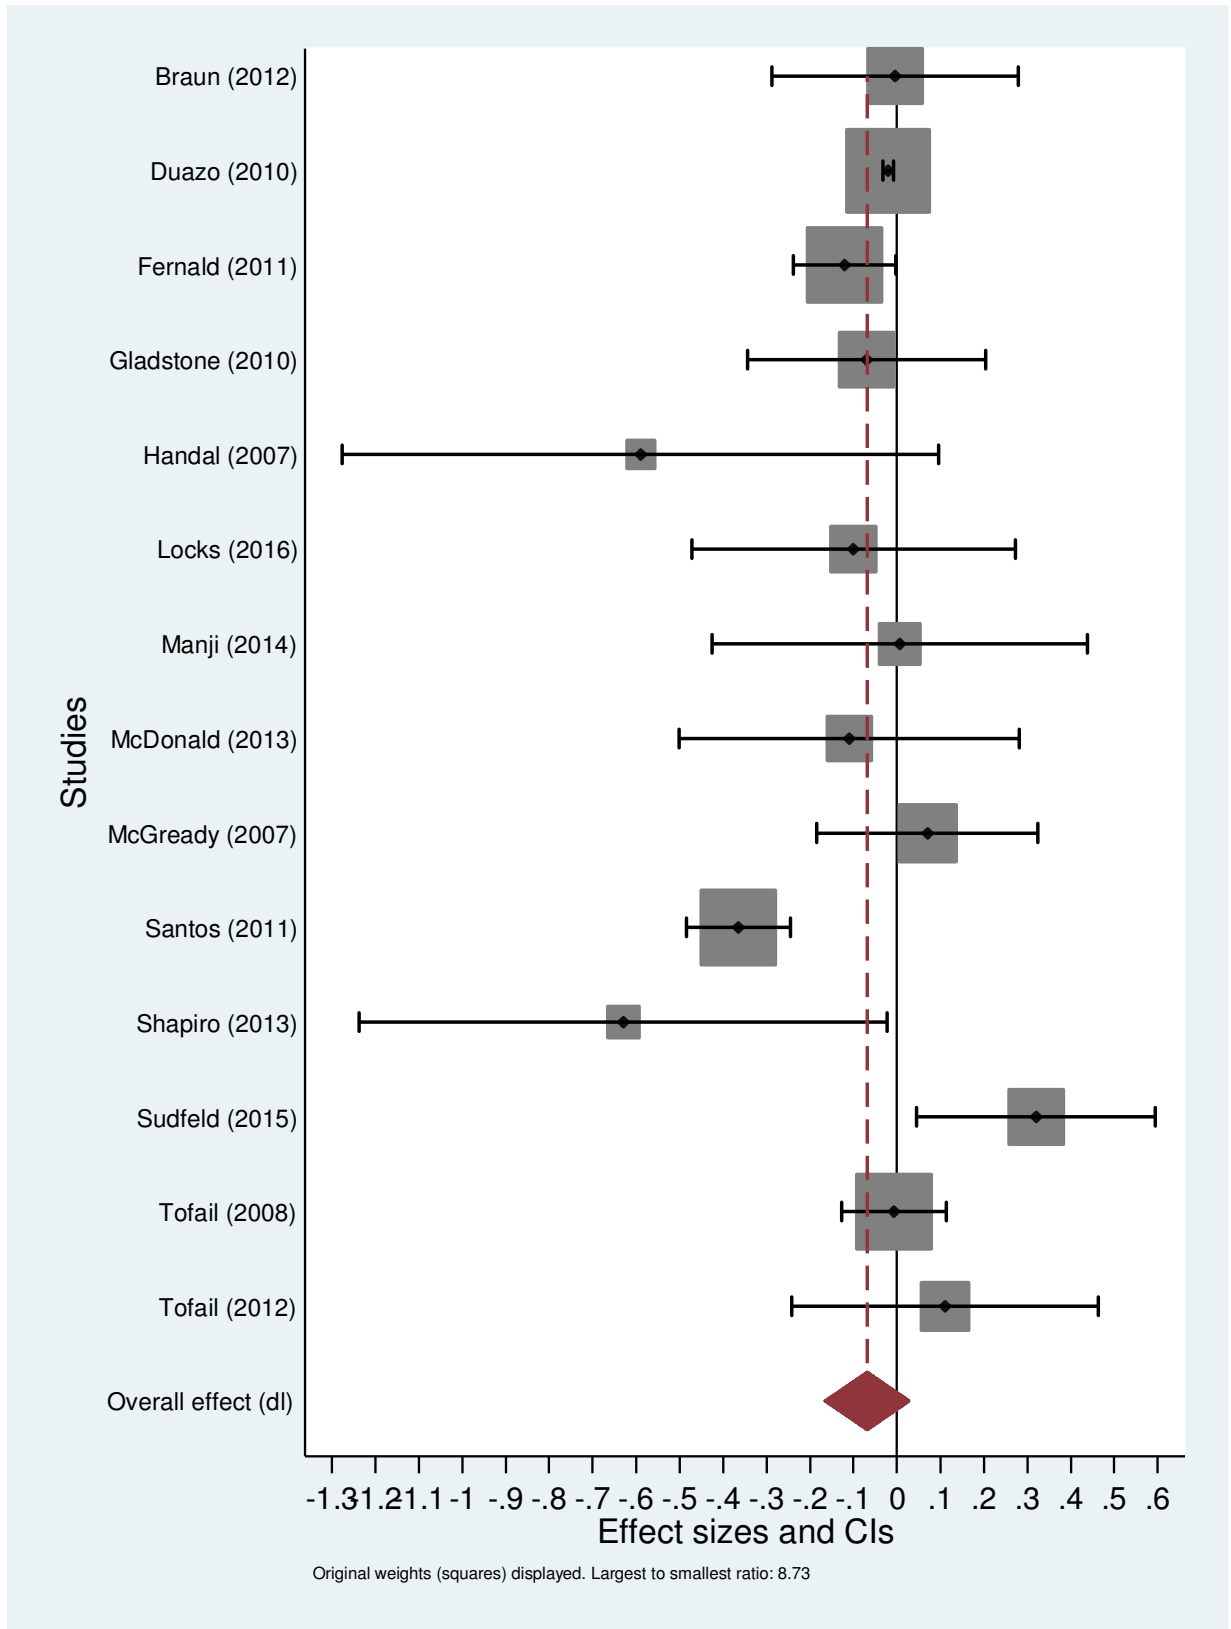

Figure 67: Association between maternal height 145-150 (reference: >155 cm) and motor development.

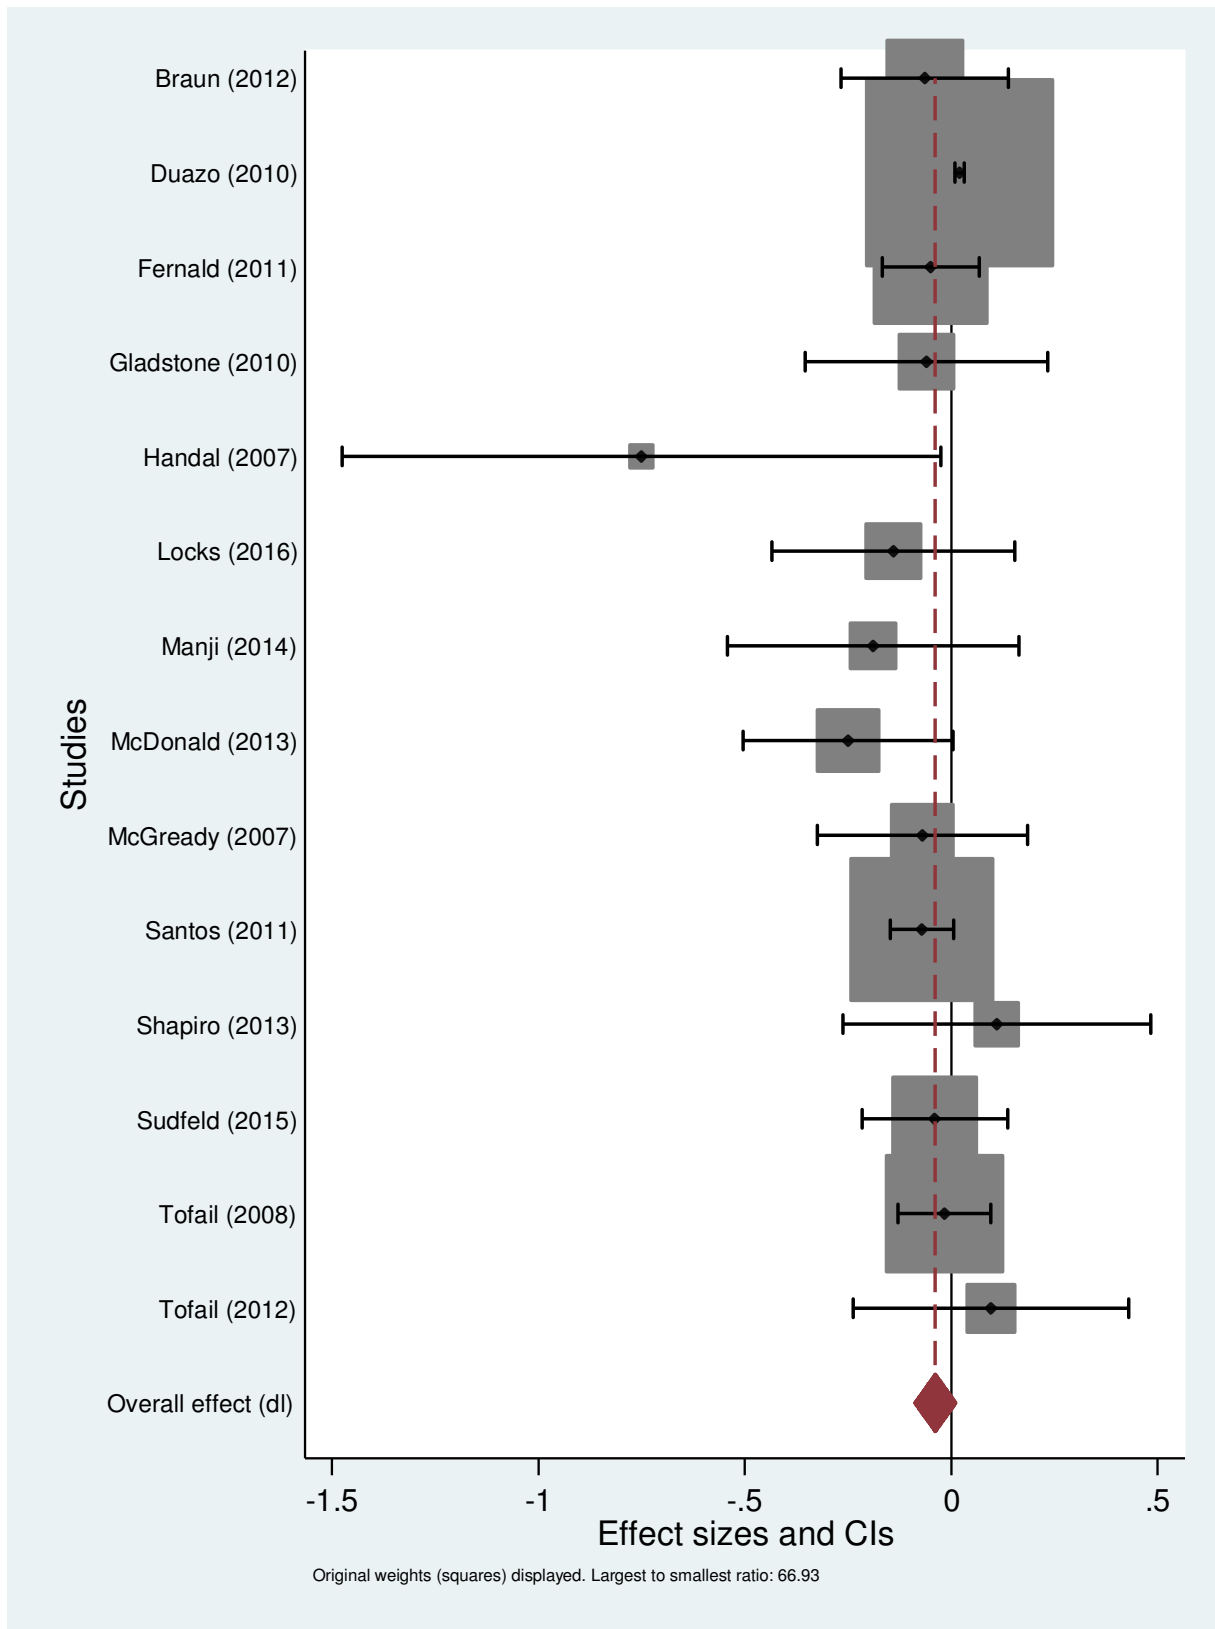

Figure 68: Association between maternal height 150-155 (reference: >155 cm) and motor development.

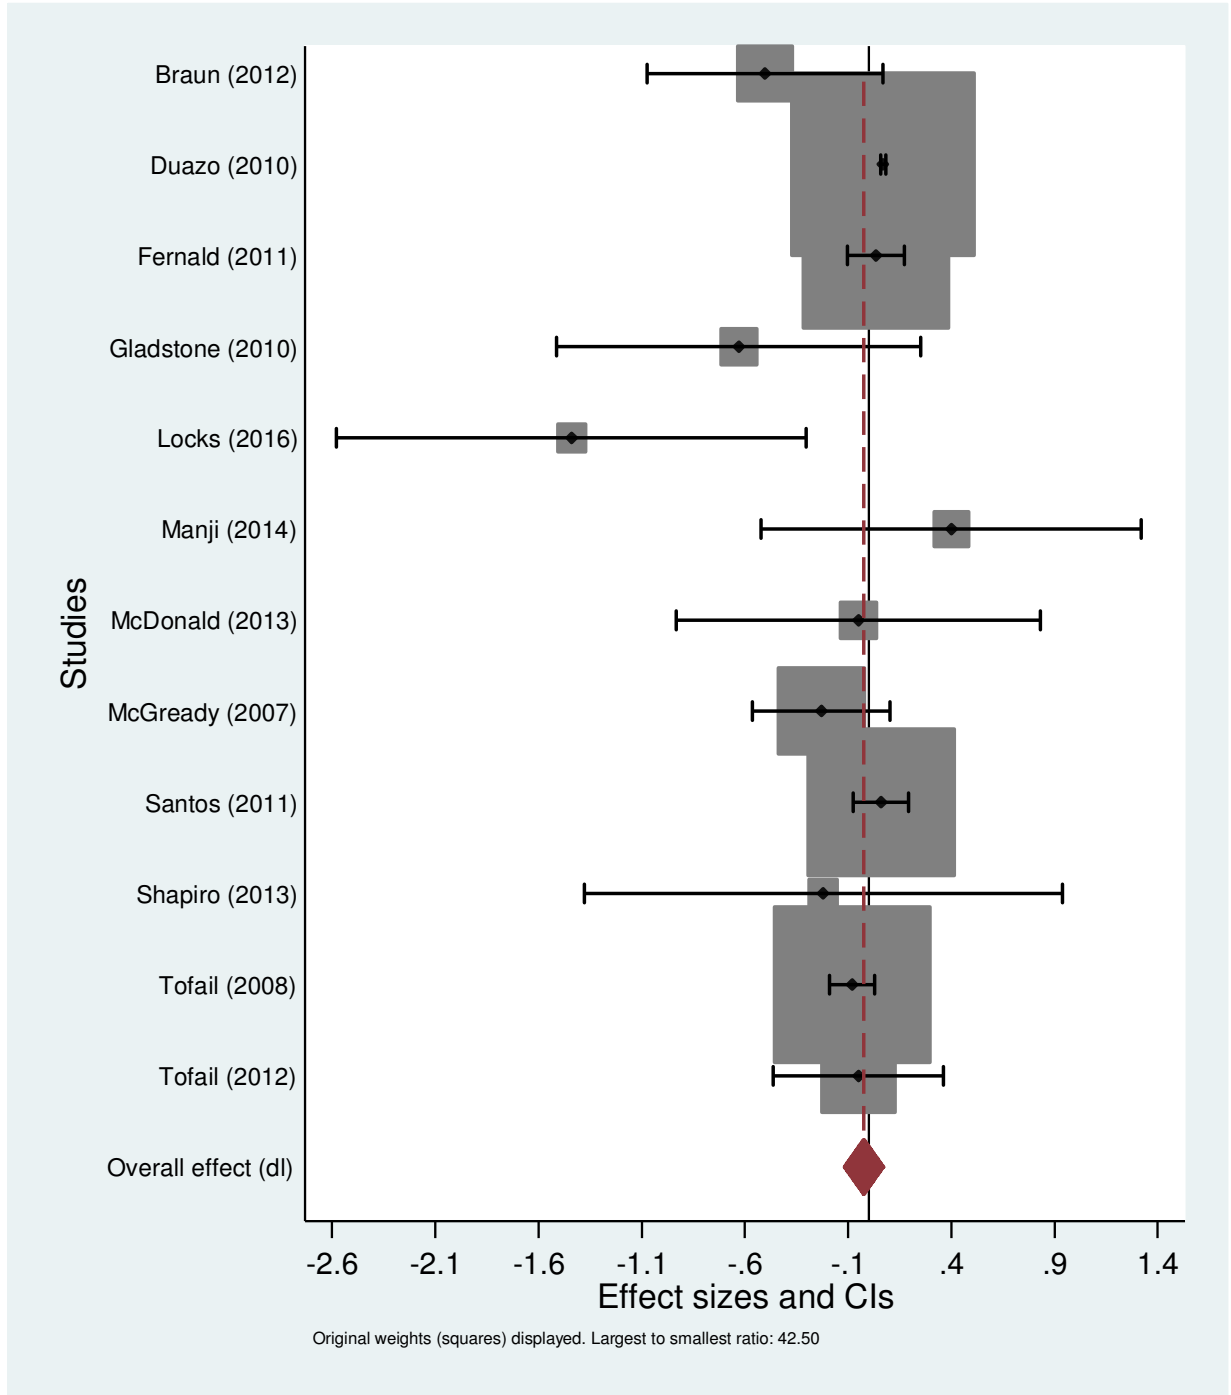

**Figure 69: Association between maternal BMI <18.5 kg/m<sup>2</sup> (reference: 18.5-25) and motor development.**

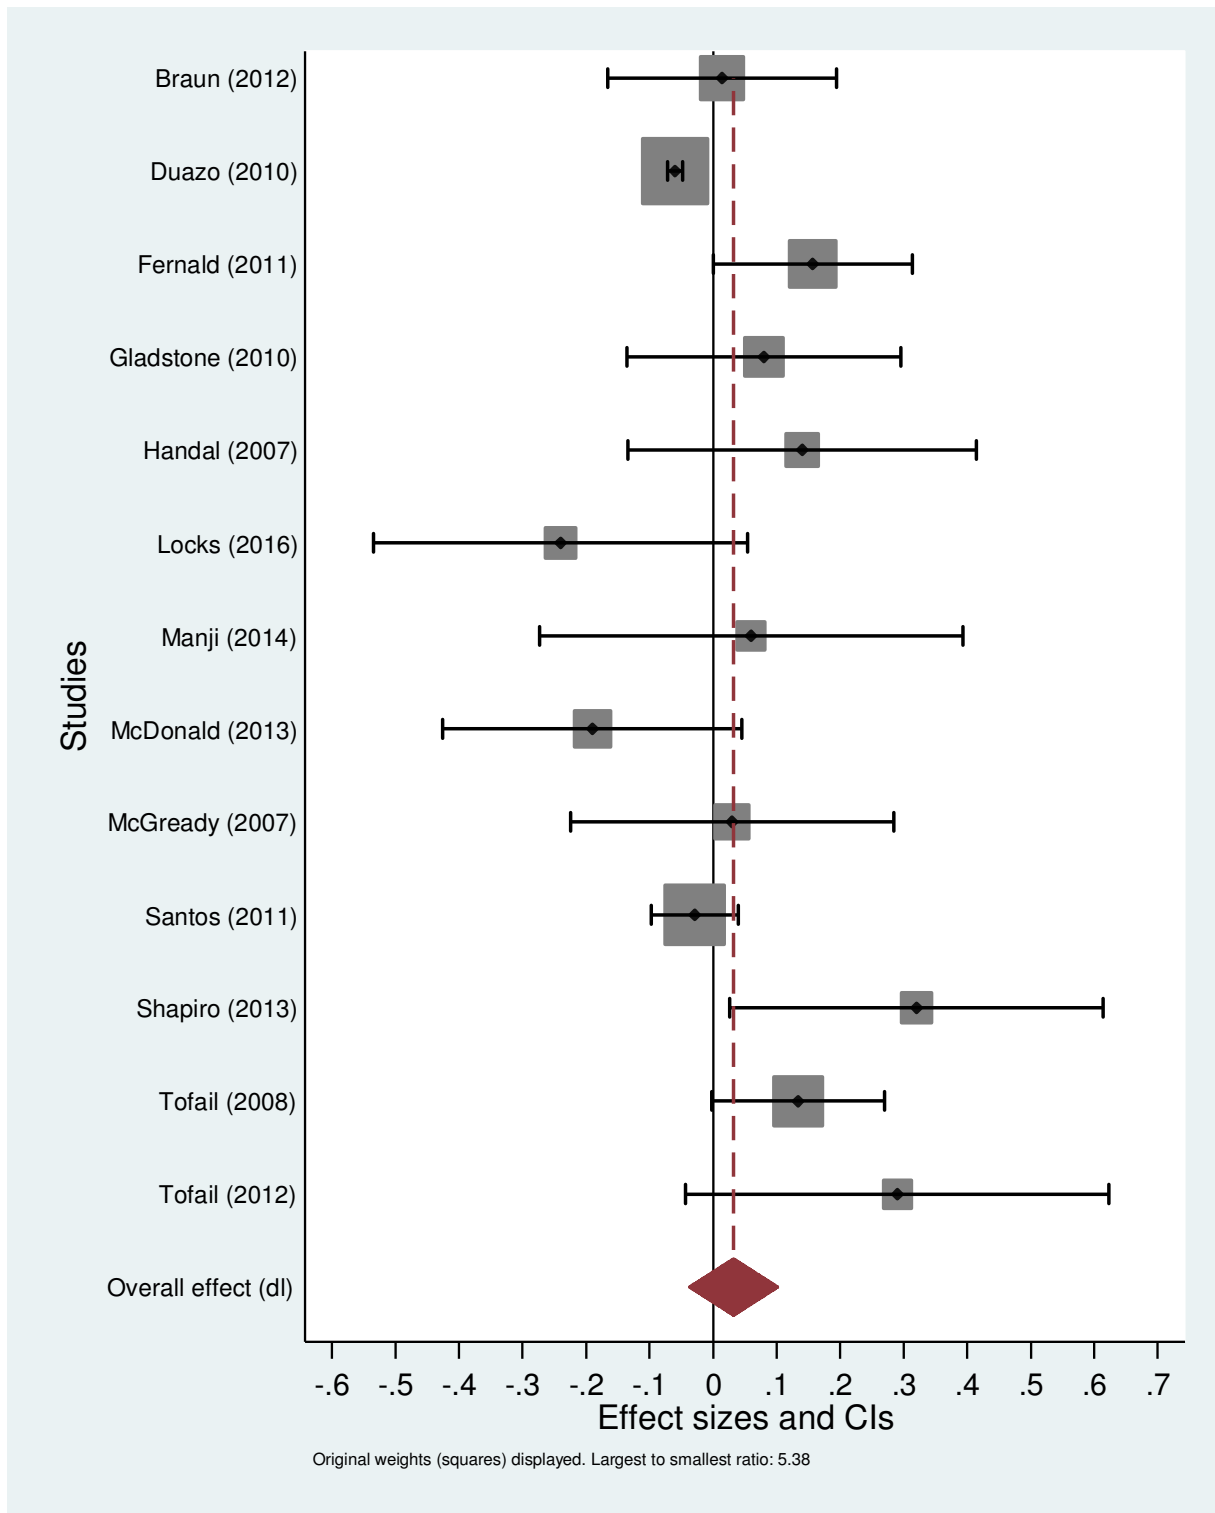

**Figure 70: Association between maternal BMI <25-30 kg/m<sup>2</sup> (reference: 18.5-25) and motor development.**

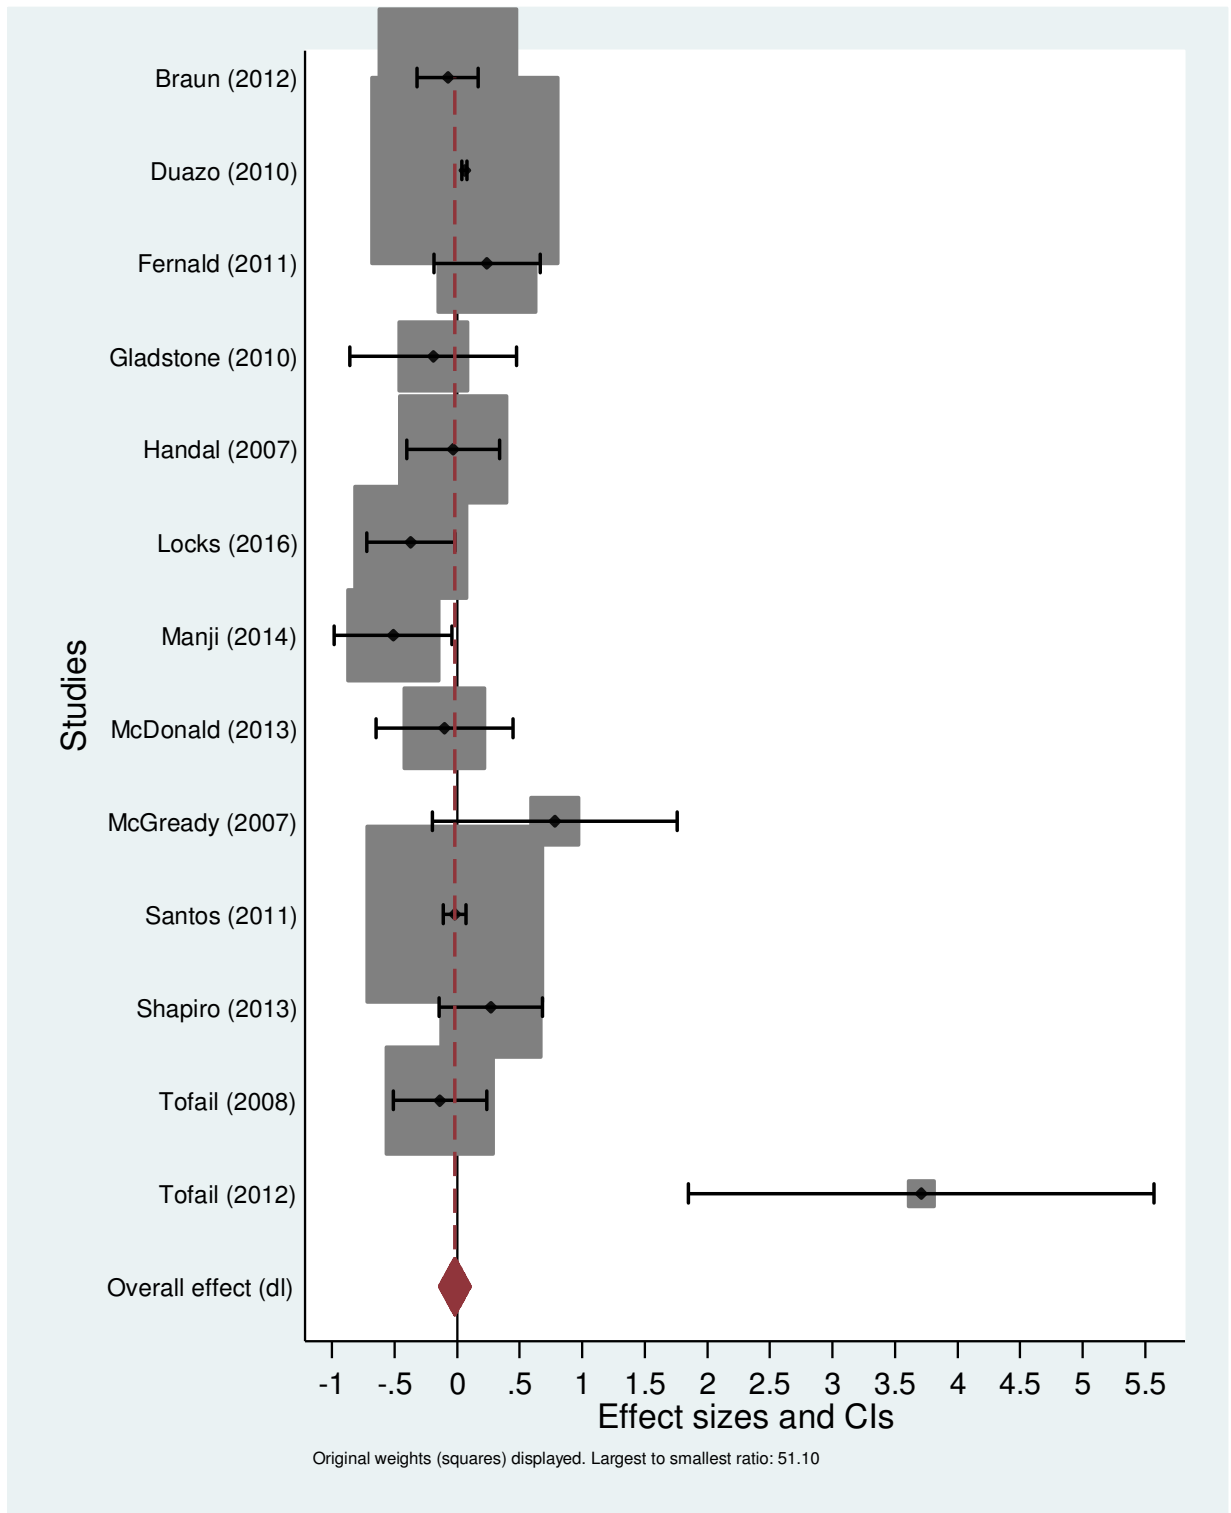

Figure 71: Association between maternal BMI >30 kg/m<sup>2</sup> (reference: 18.5-25) and motor development.

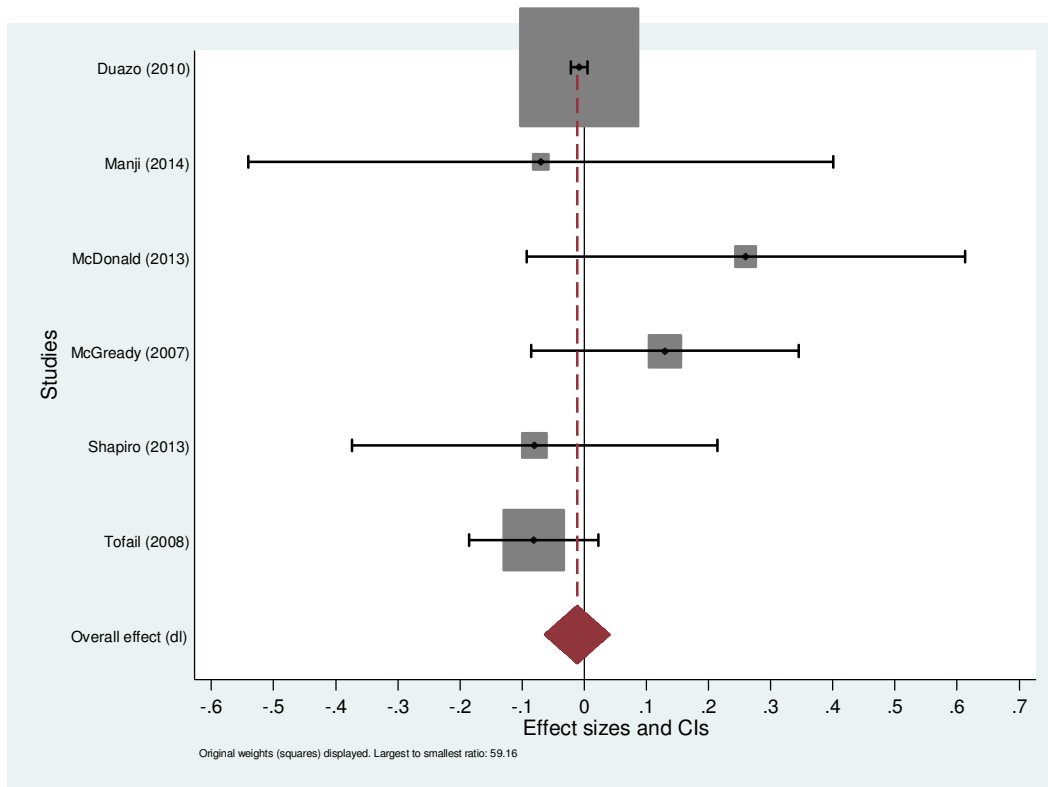

**Figure 72: Association between maternal mild anemia (reference: no anemia) and motor development.**

review only

1  
2  
3  
4  
5  
6  
7  
8  
9  
10  
11  
12  
13  
14  
15  
16  
17  
18  
19  
20  
21  
22  
23  
24  
25  
26  
27  
28  
29  
30  
31  
32  
33  
34  
35  
36  
37  
38  
39  
40  
41  
42  
43  
44  
45  
46  
47  
48  
49  
50  
51  
52  
53  
54  
55  
56  
57  
58  
59  
60

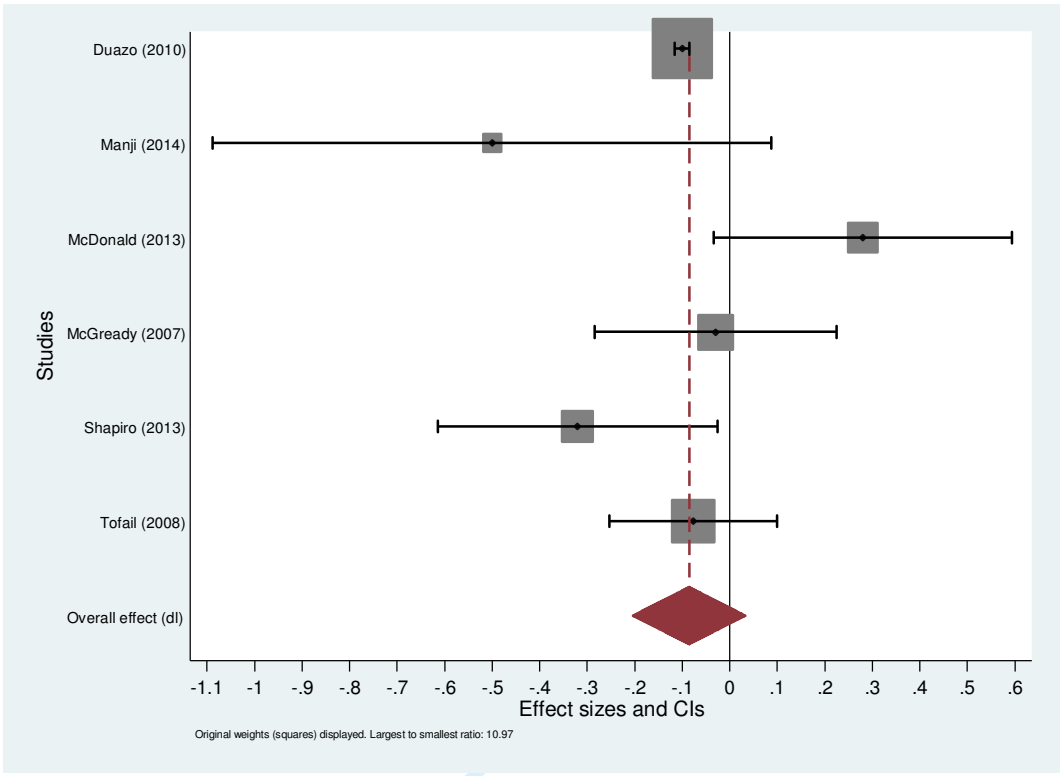

Figure 73: Association between maternal moderate anemia (reference: no anemia) and motor development.



6. Parental Risk Factors on Child's Language Development

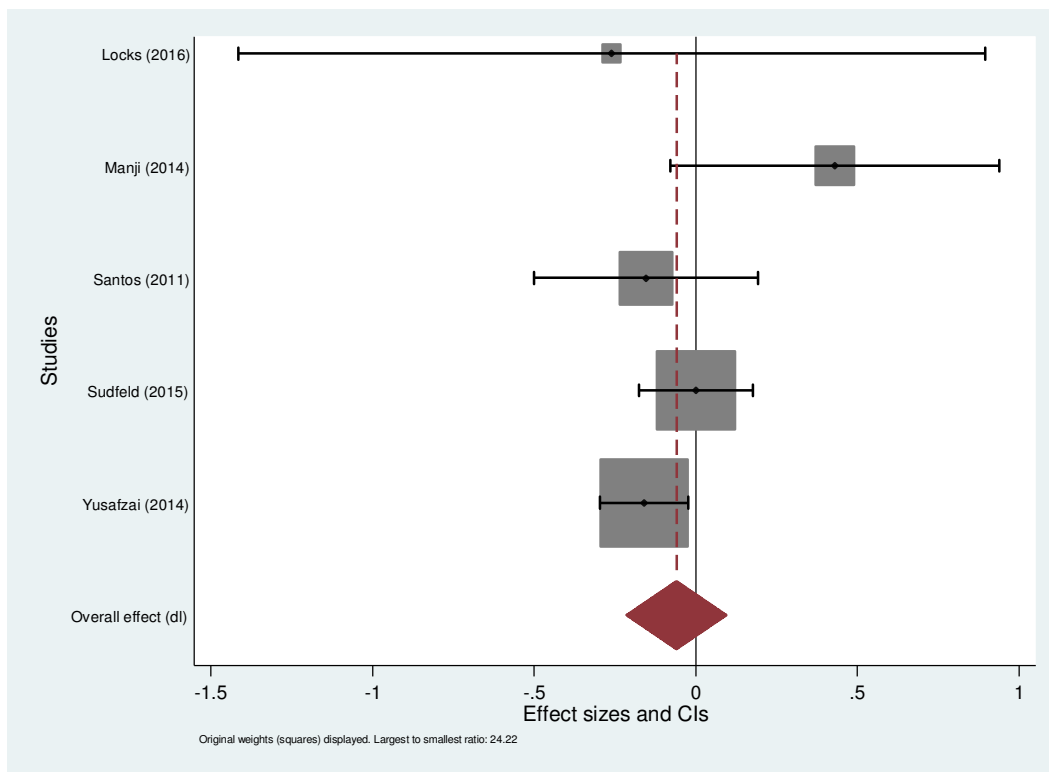

Figure 74: Association between no maternal education (reference: primary education) and language development.

1  
2  
3  
4  
5  
6  
7  
8  
9  
10  
11  
12  
13  
14  
15  
16  
17  
18  
19  
20  
21  
22  
23  
24  
25  
26  
27  
28  
29  
30  
31  
32  
33  
34  
35  
36  
37  
38  
39  
40  
41  
42  
43  
44  
45  
46  
47  
48  
49  
50  
51  
52  
53  
54  
55  
56  
57  
58  
59  
60

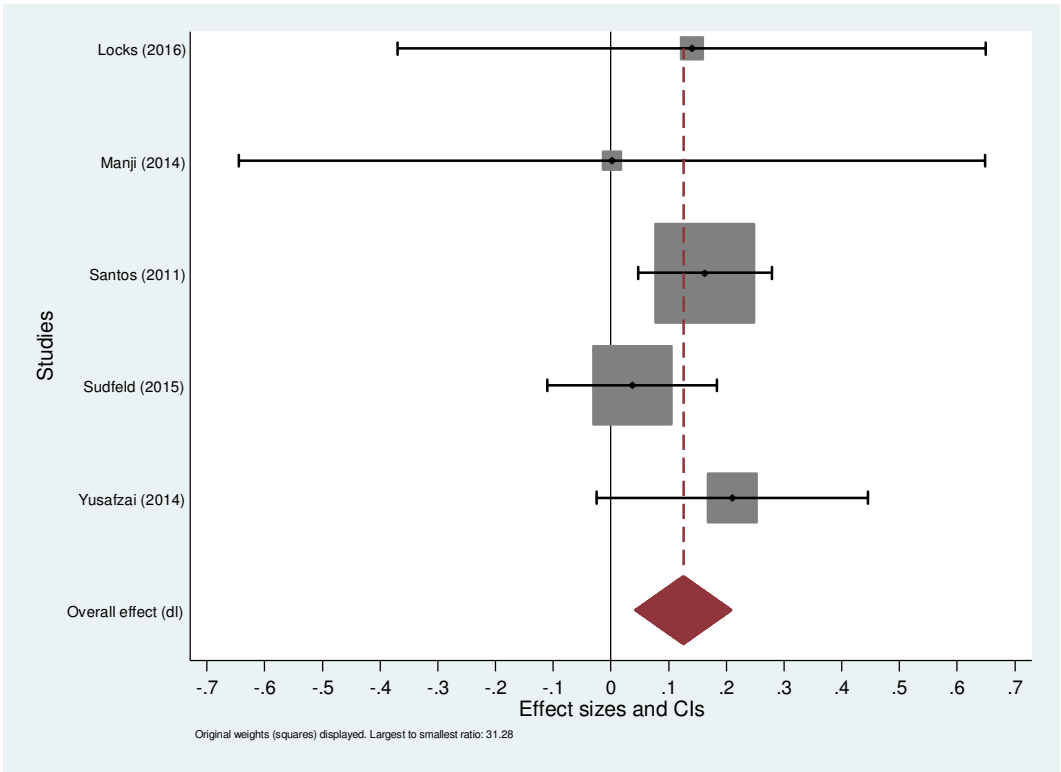

Figure 75: Association between maternal secondary education (reference: primary education) and language development.

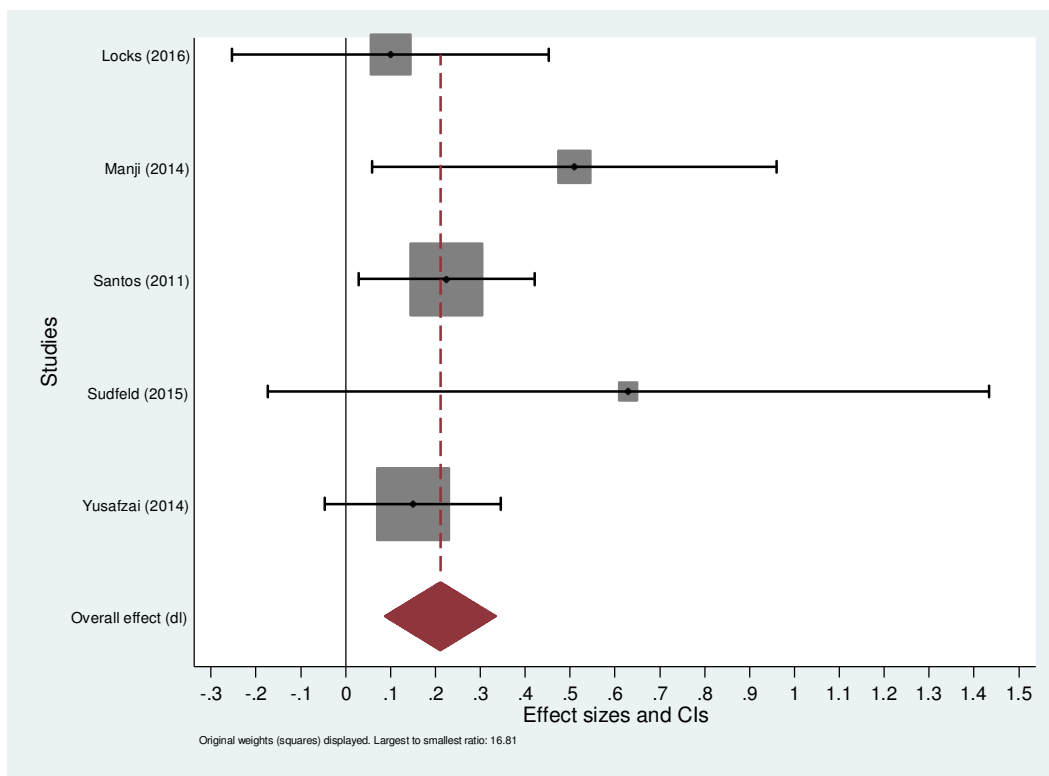

Figure 76: Association between maternal higher education (reference: primary education) and language development.

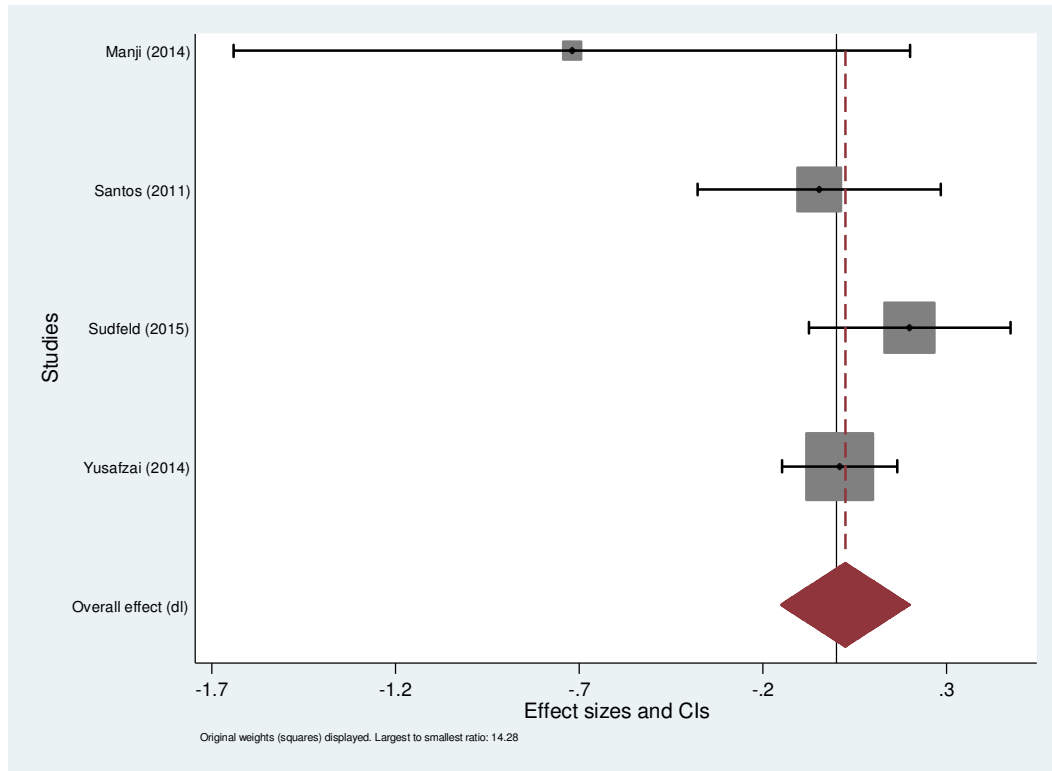

Figure 77: Association between no paternal education (reference: primary education) and language development.

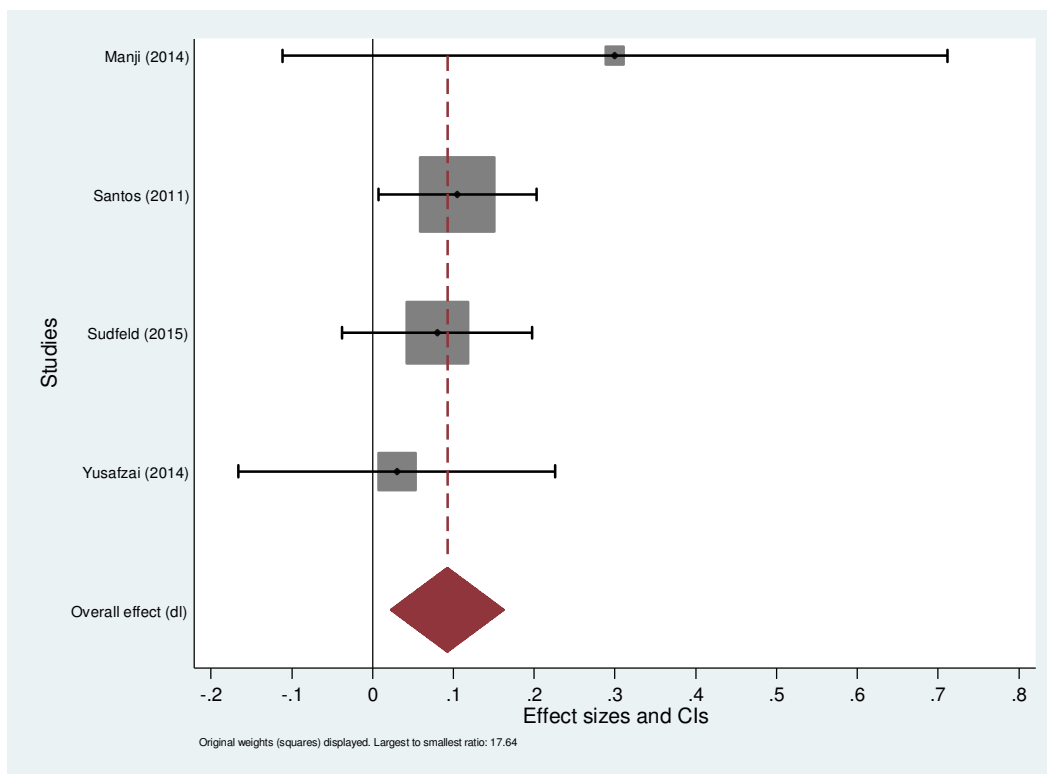

**Figure 78: Association between paternal secondary education (reference: primary education) and language development.**

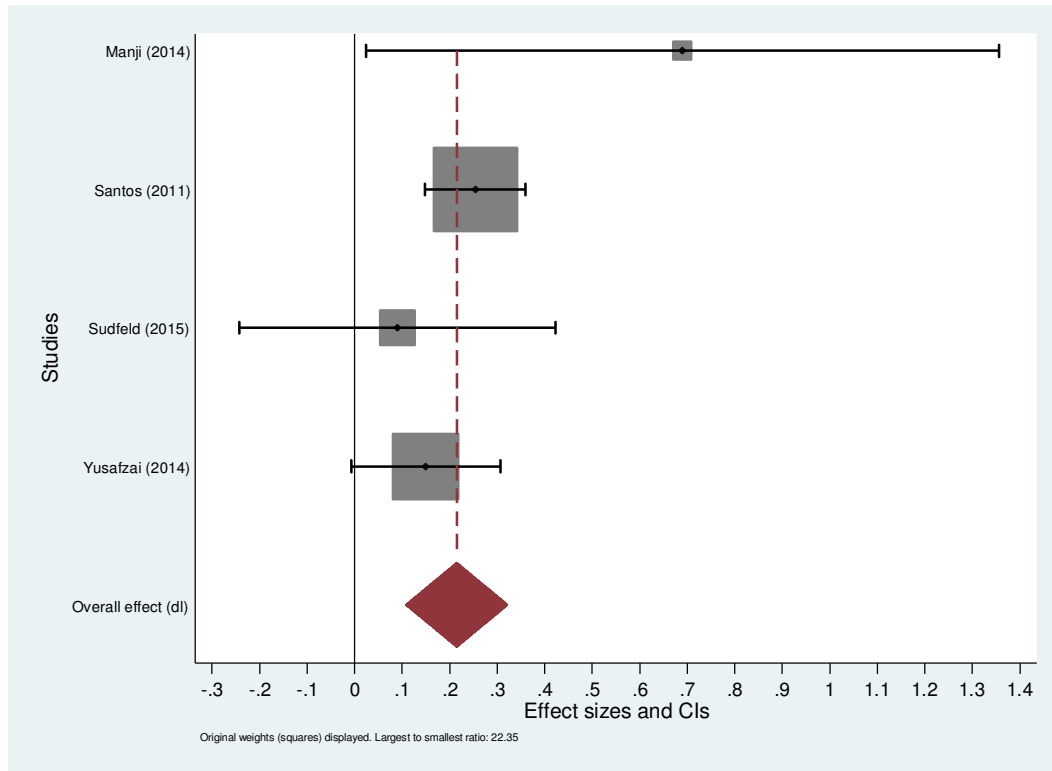

Figure 79: Association between paternal higher education (reference: primary education) and language development.

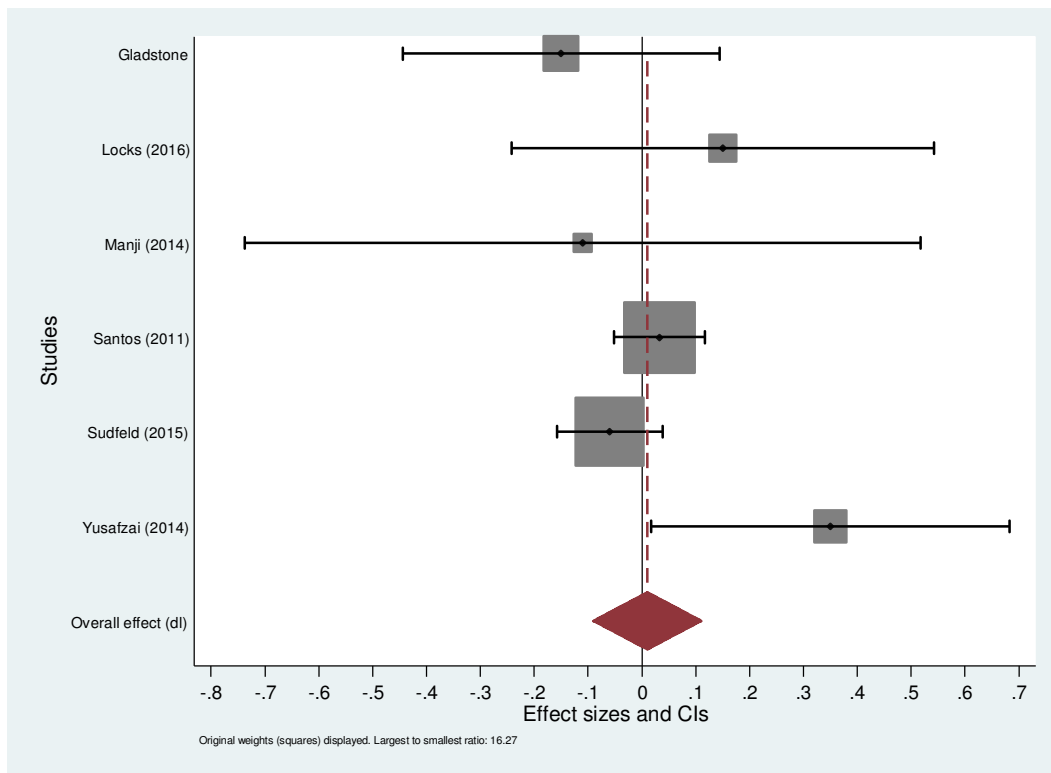

Figure 80: Association between maternal ages 15-20 (reference: ages 20-34) and language development.

1  
2  
3  
4  
5  
6  
7  
8  
9  
10  
11  
12  
13  
14  
15  
16  
17  
18  
19  
20  
21  
22  
23  
24  
25  
26  
27  
28  
29  
30  
31  
32  
33  
34  
35  
36  
37  
38  
39  
40  
41  
42  
43  
44  
45  
46  
47  
48  
49  
50  
51  
52  
53  
54  
55  
56  
57  
58  
59  
60

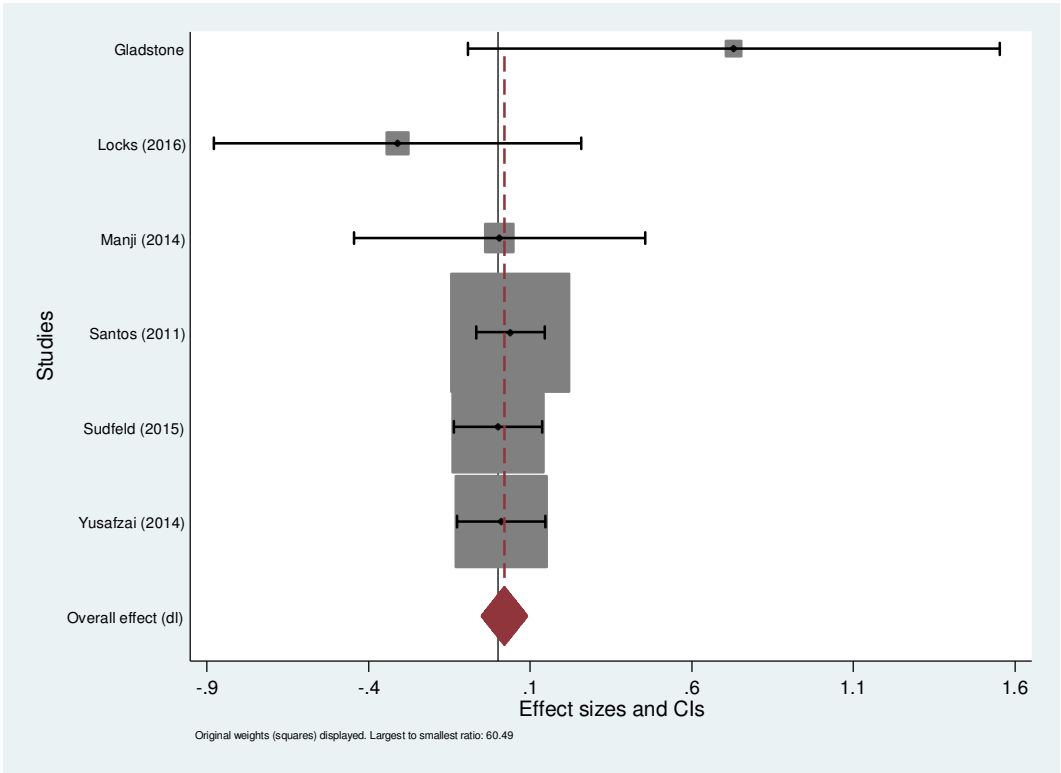

**Figure 81: Association between maternal ages >35 (reference: ages 20-34) and language development.**



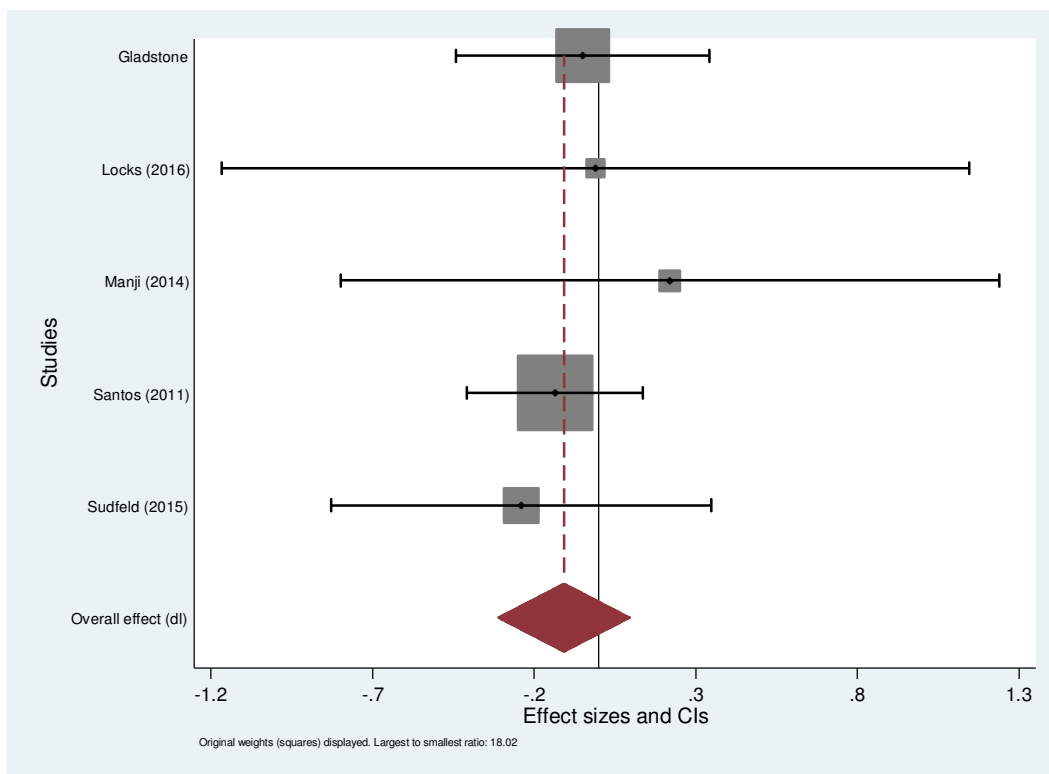

**Figure 82: Association between maternal height <145 cm (reference: >155 cm) and language development.**

1  
2  
3  
4  
5  
6  
7  
8  
9  
10  
11  
12  
13  
14  
15  
16  
17  
18  
19  
20  
21  
22  
23  
24  
25  
26  
27  
28  
29  
30  
31  
32  
33  
34  
35  
36  
37  
38  
39  
40  
41  
42  
43  
44  
45  
46  
47  
48  
49  
50  
51  
52  
53  
54  
55  
56  
57  
58  
59  
60

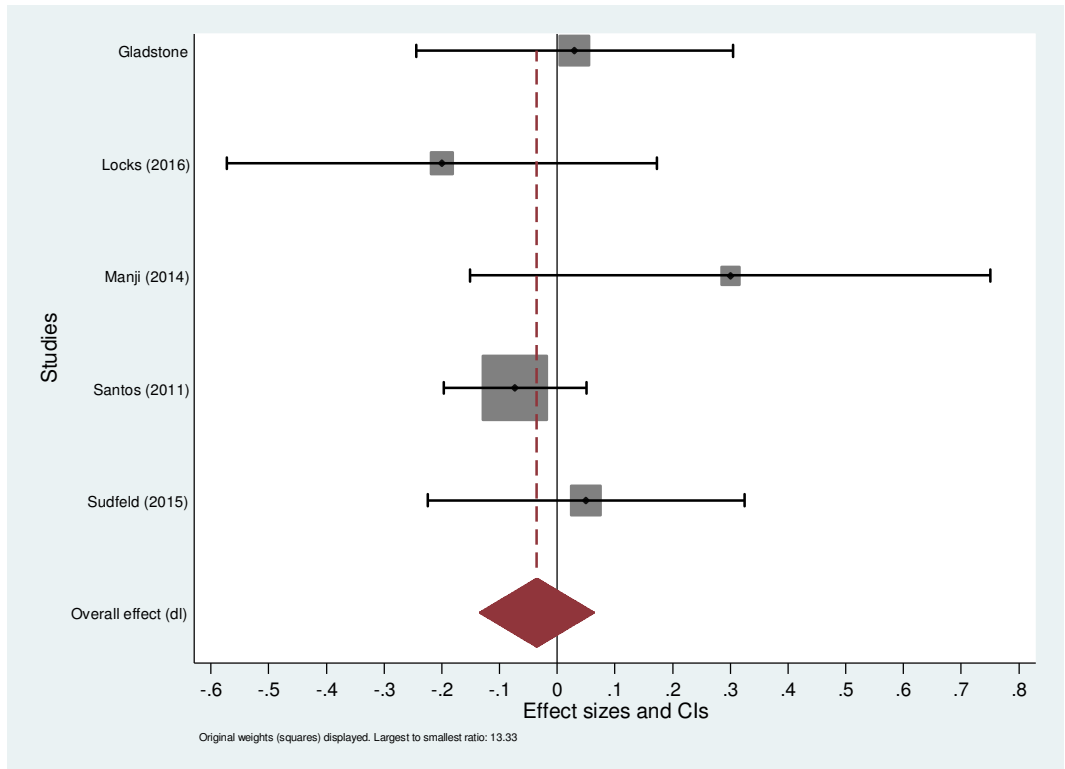

**Figure 83: Association between maternal height 145-150cm (reference: >155 cm) and language development.**

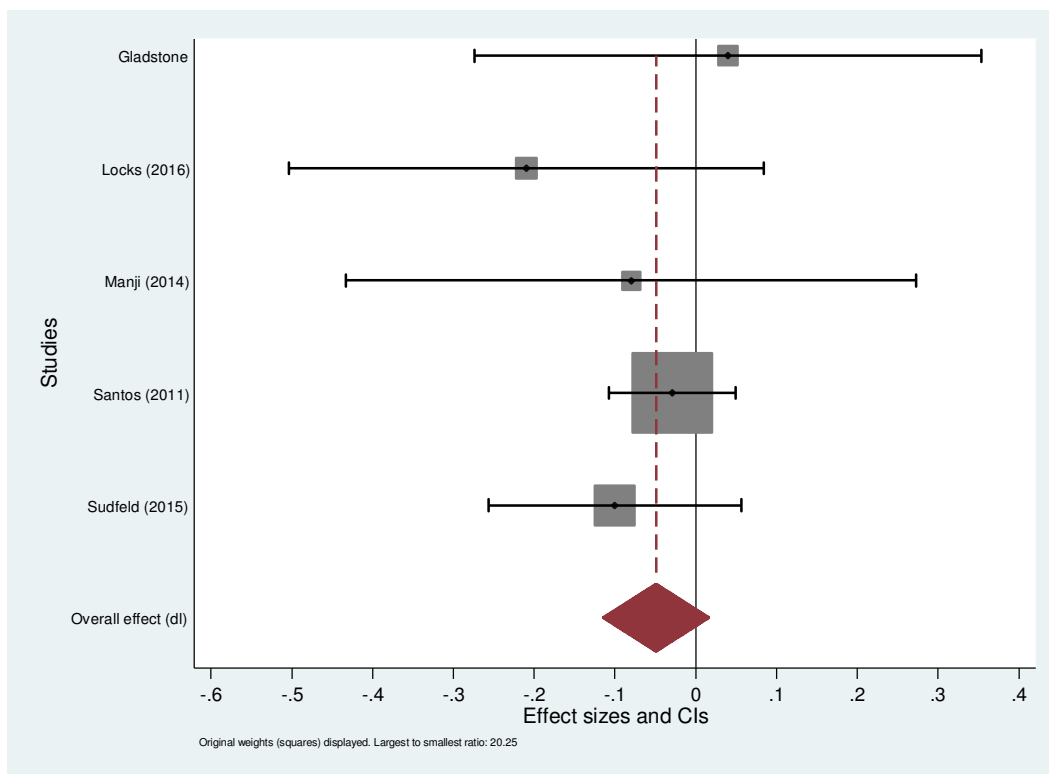

**Figure 84: Association between maternal height 150-155 cm (reference: >155 cm) and language development.**

1  
2  
3  
4  
5  
6  
7  
8  
9  
10  
11  
12  
13  
14  
15  
16  
17  
18  
19  
20  
21  
22  
23  
24  
25  
26  
27  
28  
29  
30  
31  
32  
33  
34  
35  
36  
37  
38  
39  
40  
41  
42  
43  
44  
45  
46  
47  
48  
49  
50  
51  
52  
53  
54  
55  
56  
57  
58  
59  
60

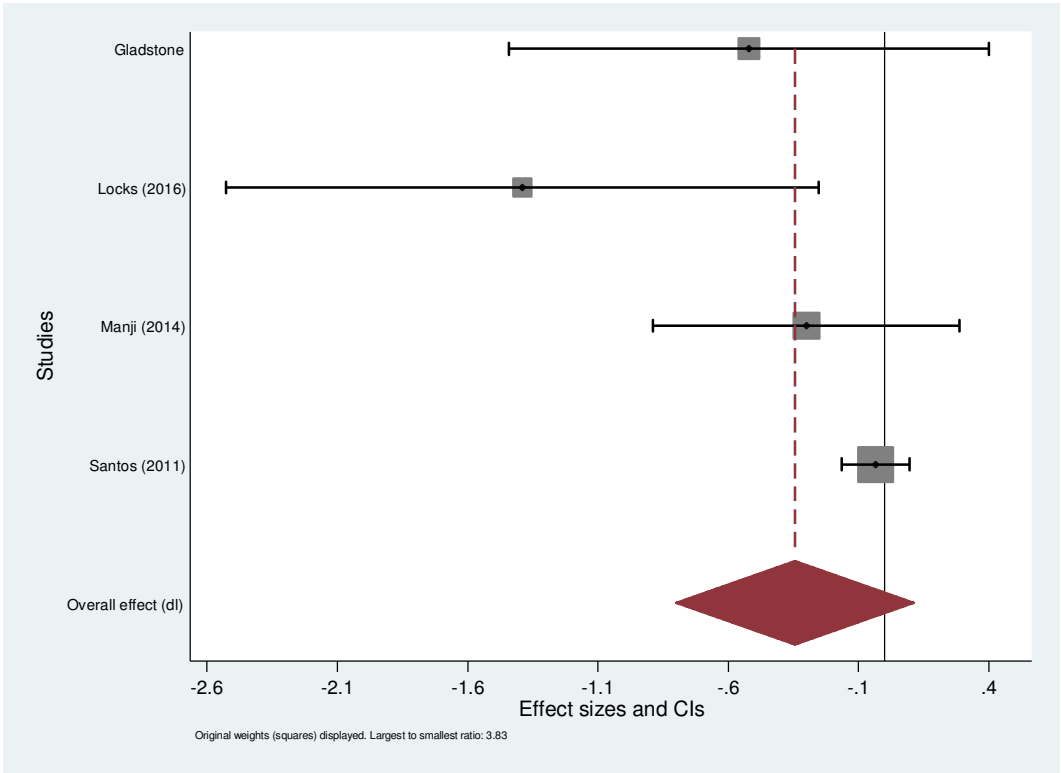

Figure 85: Association between maternal BMI 25-30 kg/m<sup>2</sup> (reference: 18.5-25) and language development.

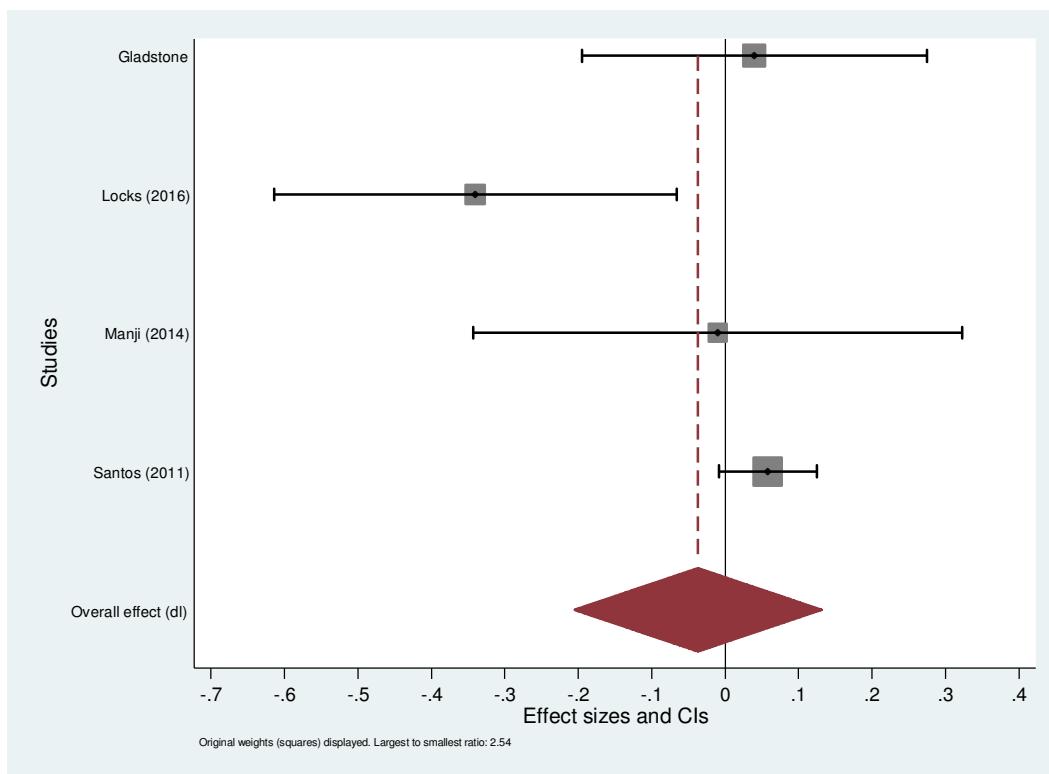

**Figure 86: Association between maternal BMI >30 kg/m<sup>2</sup> (reference: 18.5-25) and language development.**

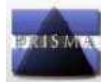

# PRISMA 2009 Checklist

| Section/topic                      | #  | Checklist item                                                                                                                                                                                                                                                                                              | Reported on page # |
|------------------------------------|----|-------------------------------------------------------------------------------------------------------------------------------------------------------------------------------------------------------------------------------------------------------------------------------------------------------------|--------------------|
| <b>TITLE</b>                       |    |                                                                                                                                                                                                                                                                                                             |                    |
| Title                              | 1  | Identify the report as a systematic review, meta-analysis, or both.                                                                                                                                                                                                                                         | No                 |
| <b>ABSTRACT</b>                    |    |                                                                                                                                                                                                                                                                                                             |                    |
| Structured summary                 | 2  | Provide a structured summary including, as applicable: background; objectives; data sources; study eligibility criteria, participants, and interventions; study appraisal and synthesis methods; results; limitations; conclusions and implications of key findings; systematic review registration number. | 5                  |
| <b>INTRODUCTION</b>                |    |                                                                                                                                                                                                                                                                                                             |                    |
| Rationale                          | 3  | Describe the rationale for the review in the context of what is already known.                                                                                                                                                                                                                              | 6                  |
| Objectives                         | 4  | Provide an explicit statement of questions being addressed with reference to participants, interventions, comparisons, outcomes, and study design (PICOS).                                                                                                                                                  | 6-7                |
| <b>METHODS</b>                     |    |                                                                                                                                                                                                                                                                                                             |                    |
| Protocol and registration          | 5  | Indicate if a review protocol exists, if and where it can be accessed (e.g., Web address), and, if available, provide registration information including registration numbers.                                                                                                                              | yes                |
| Eligibility criteria               | 6  | Specify study characteristics (e.g., PICOS, length of follow-up) and report characteristics (e.g., years considered, language, publication status) used as criteria for eligibility, giving rationale.                                                                                                      | 8                  |
| Information sources                | 7  | Describe all information sources (e.g., databases with dates of coverage, contact with study authors to identify additional studies) in the search and date last searched.                                                                                                                                  | 8                  |
| Search                             | 8  | Present full electronic search strategy for at least one database, including any limits used, such that it could be repeated.                                                                                                                                                                               | Appendix 1         |
| Study selection                    | 9  | State the process for selecting studies (i.e., screening, eligibility, included in systematic review, and, if applicable, included in the meta-analysis).                                                                                                                                                   | 8 & 10             |
| Data collection process            | 10 | Describe method of data extraction from reports (e.g., piloted forms, independently, in duplicate) and any processes for obtaining and confirming data from investigators.                                                                                                                                  | 8                  |
| Data items                         | 11 | List and define all variables for which data were sought (e.g., PICOS, funding sources) and any assumptions and simplifications made.                                                                                                                                                                       | 9                  |
| Risk of bias in individual studies | 12 | Describe methods used for assessing risk of bias of individual studies (including specification of whether this was done at the study or outcome level), and how this information is to be used in any data synthesis.                                                                                      | N/A <sup>a</sup>   |
| Summary measures                   | 13 | State the principal summary measures (e.g., risk ratio, difference in means).                                                                                                                                                                                                                               | 10                 |
| Synthesis of results               | 14 | Describe the methods of handling data and combining results of studies, if done, including measures of consistency (e.g., $I^2$ ) for each meta-analysis.                                                                                                                                                   | 10                 |



# PRISMA 2009 Checklist

Page 1 of 2

| Section/topic                 | #  | Checklist item                                                                                                                                                                                           | Reported on page # |
|-------------------------------|----|----------------------------------------------------------------------------------------------------------------------------------------------------------------------------------------------------------|--------------------|
| Risk of bias across studies   | 15 | Specify any assessment of risk of bias that may affect the cumulative evidence (e.g., publication bias, selective reporting within studies).                                                             | N/A <sup>b</sup>   |
| Additional analyses           | 16 | Describe methods of additional analyses (e.g., sensitivity or subgroup analyses, meta-regression), if done, indicating which were pre-specified.                                                         | 10                 |
| <b>RESULTS</b>                |    |                                                                                                                                                                                                          |                    |
| Study selection               | 17 | Give numbers of studies screened, assessed for eligibility, and included in the review, with reasons for exclusions at each stage, ideally with a flow diagram.                                          | Figure 1           |
| Study characteristics         | 18 | For each study, present characteristics for which data were extracted (e.g., study size, PICOS, follow-up period) and provide the citations.                                                             | Table 1            |
| Risk of bias within studies   | 19 | Present data on risk of bias of each study and, if available, any outcome level assessment (see item 12).                                                                                                | N/A <sup>b</sup>   |
| Results of individual studies | 20 | For all outcomes considered (benefits or harms), present, for each study: (a) simple summary data for each intervention group (b) effect estimates and confidence intervals, ideally with a forest plot. | Appendix 2         |
| Synthesis of results          | 21 | Present results of each meta-analysis done, including confidence intervals and measures of consistency.                                                                                                  | Tables 2 and 3     |
| Risk of bias across studies   | 22 | Present results of any assessment of risk of bias across studies (see Item 15).                                                                                                                          | N/A <sup>b</sup>   |
| Additional analysis           | 23 | Give results of additional analyses, if done (e.g., sensitivity or subgroup analyses, meta-regression [see Item 16]).                                                                                    | 11-13              |
| <b>DISCUSSION</b>             |    |                                                                                                                                                                                                          |                    |
| Summary of evidence           | 24 | Summarize the main findings including the strength of evidence for each main outcome; consider their relevance to key groups (e.g., healthcare providers, users, and policy makers).                     | 14-17              |
| Limitations                   | 25 | Discuss limitations at study and outcome level (e.g., risk of bias), and at review-level (e.g., incomplete retrieval of identified research, reporting bias).                                            | 18                 |
| Conclusions                   | 26 | Provide a general interpretation of the results in the context of other evidence, and implications for future research.                                                                                  | 18 & 19            |
| <b>FUNDING</b>                |    |                                                                                                                                                                                                          |                    |
| Funding                       | 27 | Describe sources of funding for the systematic review and other support (e.g., supply of data); role of funders for the systematic review.                                                               | 3                  |

- a. Same analyses were conducted in all individual studies by the authors and then estimates from individual studies were combined in pooled estimates. Therefore, assessment of quality of individual studies were not done.
- b. Selection of studies were not based on published literature only, a large number of the studies were unpublished

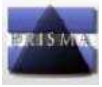

# PRISMA 2009 Checklist

1  
2  
3  
4  
5  
6  
7  
8  
9  
10  
11  
12  
13  
14  
15  
16  
17  
18  
19  
20  
21  
22  
23  
24  
25  
26  
27  
28  
29  
30  
31  
32  
33  
34  
35  
36  
37  
38  
39  
40  
41  
42  
43  
44  
45  
46  
47

*From:* Moher D, Liberati A, Tetzlaff J, Altman DG, The PRISMA Group (2009). Preferred Reporting Items for Systematic Reviews and Meta-Analyses: The PRISMA Statement. PLoS Med 6(7): e1000097. doi:10.1371/journal.pmed1000097

For more information, visit: [www.prisma-statement.org](http://www.prisma-statement.org).

Page 2 of 2

For peer review only
