# Supplementary material for: Early life risk factors of motor, cognitive and language development: a pooled analysis of studies from low/middle-income countries
Source: PubMed Central journal article supplement — BMJ Open. 2019 Oct 3;9(10):e026449. doi: 10.1136/bmjopen-2018-026449 (PMC6797384; doi:10.1136/bmjopen-2018-026449), 2019-10-03
Supplement: bmjopen-2018-026449supp001.pdf [file bmjopen-2018-026449supp001.pdf]

## Appendix 1: Search terms

("child"[MeSH] OR "infant"[MeSH]) AND ("child development"[MeSH] OR "cognition"[MeSH] OR "psychomotor disorders"[MeSH] OR "psychomotor performance"[MeSH] OR "motor skills"[MeSH] OR "intelligence"[MeSH] OR "IQ"[All Fields] OR "executive function"[MeSH] OR "attention"[MeSH] OR "memory"[MeSH] OR "learning"[MeSH] OR "education"[MeSH] OR "reading"[MeSH] OR "mathematics"[MeSH] OR "learning disorders"[MeSH] OR "aptitude tests"[MeSH] OR "language tests"[MeSH] OR "mental health"[MeSH] OR "child behavior"[MeSH] OR "emotional intelligence"[MeSH] OR "emotions"[MeSH] OR "temperament"[MeSH] OR "self concept"[MeSH] OR "self efficacy"[MeSH] OR "mental competency"[MeSH] OR "aggression"[MeSH]) AND ("preterm"[All Fields] OR "low birth weight"[All Fields] OR "maternal height" OR "maternal underweight" OR "malaria" OR "birth spacing" OR "Teen pregnancy" OR "anemia" or "hemoglobin" OR "HIV" OR "iron supplement" OR "iron deficiency" OR "childhood diarrhea" OR "HIV" OR "zinc" OR "iodine" OR "sanitation" OR "clean water" OR "breastfeeding" OR "hookworms" ) AND ("Armenia"[All Fields] OR "Azerbaijan"[All Fields] OR "Georgia"[All Fields] OR "Kazakhstan"[All Fields] OR "Kyrgyzstan"[All Fields] OR "Mongolia"[All Fields] OR "Tajikistan"[All Fields] OR "Turkmenistan"[All Fields] OR "Uzbekistan"[All Fields] OR "Afghanistan"[All Fields] OR "Bangladesh"[All Fields] OR "Bhutan"[All Fields] OR "India"[All Fields] OR "Nepal"[All Fields] OR "Pakistan"[All Fields] OR "Cambodia"[All Fields] OR "Indonesia"[All Fields] OR "Lao People's Democratic Republic"[All Fields] OR "Malaysia"[All Fields] OR "Maldives"[All Fields] OR "Mauritius"[All Fields] OR "Mayotte"[All Fields] OR "Myanmar"[All Fields] OR "Philippines"[All Fields] OR "Seychelles"[All Fields] OR "Sri Lanka"[All Fields] OR "Thailand"[All Fields] OR "Viet Nam"[All Fields] OR "Anguilla"[All Fields] OR "Antigua and Barbuda"[All Fields] OR "Aruba"[All Fields] OR "Bahamas"[All Fields] OR "Barbados"[All Fields] OR "Belize"[All Fields] OR "Bermuda"[All Fields] OR "British Virgin Islands"[All Fields] OR "Cayman Islands"[All Fields] OR "Cuba"[All Fields] OR "Turks and Caicos Islands"[All Fields] OR "Bolivia"[All Fields] OR "Ecuador"[All Fields] OR "Peru"[All Fields] OR "Colombia"[All Fields] OR "Costa Rica"[All Fields] OR "El Salvador"[All Fields] OR "Guatemala"[All Fields] OR "Honduras"[All Fields] OR "Mexico"[All Fields] OR "Nicaragua"[All Fields] OR "Panama"[All Fields] OR "Venezuela"[All Fields] OR "Argentina"[All Fields] OR "Chile"[All Fields] OR "Falkland Islands"[All Fields] OR "Malvinas"[All Fields] OR "Uruguay"[All Fields] OR "Brazil"[All Fields] OR "Paraguay"[All Fields] OR "Algeria"[All Fields] OR "Bahrain"[All Fields] OR "Egypt"[All Fields] OR "Iran"[All Fields] OR "Iraq"[All Fields] OR "Jordan"[All Fields] OR "Kuwait"[All Fields] OR "Lebanon"[All Fields] OR "Libyan Arab Jamahiriya"[All Fields] OR "Morocco"[All Fields] OR "Occupied Palestinian Territory"[All Fields] OR "Oman"[All Fields] OR "Qatar"[All Fields] OR "Saudi Arabia"[All Fields] OR "Syrian Arab Republic"[All Fields] OR "Tunisia"[All Fields] OR "Turkey"[All Fields] OR "United Arab Emirates"[All Fields] OR "Western Sahara"[All Fields] OR "Yemen"[All Fields] OR "American Samoa"[All Fields] OR "Cook Islands"[All Fields] OR "Fiji"[All Fields] OR "French Polynesia"[All Fields] OR "Guam"[All Fields] OR "Kiribati"[All Fields] OR "Marshall Islands"[All Fields] OR "Micronesia"[All Fields] OR "Nauru"[All Fields] OR "New Caledonia"[All Fields] OR "Niue"[All Fields] OR "Northern Mariana Islands"[All Fields] OR "Palau"[All Fields] OR "Papua New Guinea"[All Fields] OR "Pitcairn"[All Fields] OR "Samoa"[All Fields] OR "Solomon Islands"[All Fields] OR "Tokelau"[All Fields] OR "Tonga"[All Fields] OR "Tuvalu"[All Fields] OR "Vanuatu"[All Fields] OR "Wallis and Futuna Islands"[All Fields] OR "Angola"[All Fields] OR "Central African Republic"[All Fields] OR

"Congo"[All Fields] OR "Democratic Republic of the Congo"[All Fields] OR "Equatorial Guinea"[All Fields] OR "Gabon"[All Fields] OR "Burundi"[All Fields] OR "Comoros"[All Fields] OR "Djibouti"[All Fields] OR "Eritrea"[All Fields] OR "Ethiopia"[All Fields] OR "Kenya"[All Fields] OR "Madagascar"[All Fields] OR "Malawi"[All Fields] OR "Mozambique"[All Fields] OR "Rwanda"[All Fields] OR "Somalia"[All Fields] OR "Sudan"[All Fields] OR "Uganda"[All Fields] OR "United Republic of Tanzania"[All Fields] OR "Zambia"[All Fields] OR "Botswana"[All Fields] OR "Lesotho"[All Fields] OR "Namibia"[All Fields] OR "South Africa"[All Fields] OR "Swaziland"[All Fields] OR "Zimbabwe"[All Fields] OR "Benin"[All Fields] OR "Burkina Faso"[All Fields] OR "Cameroon"[All Fields] OR "Cape Verde"[All Fields] OR "Chad"[All Fields] OR "Cote d'Ivoire"[All Fields] OR "Gambia"[All Fields] OR "Ghana"[All Fields] OR "Guinea"[All Fields] OR "Guinea-Bissau"[All Fields] OR "Liberia"[All Fields] OR "Mali"[All Fields] OR "Mauritania"[All Fields] OR "Niger"[All Fields] OR "Nigeria"[All Fields] OR "Saint Helena"[All Fields] OR "Sao Tome and Principe"[All Fields] OR "Senegal"[All Fields] OR "Sierra Leone"[All Fields] OR "Togo"[All Fields])

## Appendix 2: Forest plots

|                                                                                                                                |    |
|--------------------------------------------------------------------------------------------------------------------------------|----|
| Figure 1: Association between low birth weight (LBW) and (reference: normal birth weight) and cognitive development. ....      | 7  |
| Figure 2: Association between Moderately low birth Weight (reference, normal birth weight) and cognitive development. ....     | 8  |
| Figure 3: Association between very low Birth weight (reference: normal birth weight)) and cognitive development.....           | 9  |
| Figure 4: Association between child mild anemia (reference: no anemia) and cognitive development. ...                          | 10 |
| Figure 5: Association between child moderate anemia (reference: no anemia) and cognitive development.....                      | 11 |
| Figure 6: Association between lack of access to clean water (reference: access to clean water) and cognitive development. .... | 12 |
| Figure 7: Association between lack of access to sanitation (reference: access to sanitation) and cognitive development.....    | 13 |
| Figure 8: Association between preterm-AGA (reference: term-AGA) and cognitive development.....                                 | 14 |
| Figure 9: Association between term-SGA (reference: term-AGA) and cognitive development.....                                    | 15 |
| Figure 10: Association between preterm- SGA (reference: term-AGA) and cognitive development. ....                              | 16 |
| Figure 11: Association between late preterm birth, 34-37 weeks (reference: term) and cognitive development.....                | 17 |
| Figure 12: Association between early preterm birth, < 34 weeks (reference: term) and cognitive development.....                | 18 |
| Figure 13: Association between moderate SGA (reference: AGA) and cognitive development. ....                                   | 19 |
| Figure 14: Association between severe SGA (reference: AGA) and cognitive development. ....                                     | 20 |
| Figure 15: Association between low birth weight (reference: normal birth weight) and motor development.....                    | 21 |
| Figure 16: Association between moderately low birth weight (reference: normal birth weight) and motor development.....         | 22 |
| Figure 17: Association between very low birth weight (reference: normal birth weight) and motor development.....               | 23 |
| Figure 18: Association between child mild anemia (reference: no anemia) and motor development.....                             | 24 |
| Figure 19: Association between child moderate anemia (reference: no anemia) and motor development. ....                        | 25 |
| Figure 20: Association between lack of access to clean water (reference: access to clean water) and motor development.....     | 26 |
| Figure 21: Association between lack of access to sanitation (reference: access to sanitation) and motor development.....       | 27 |
| Figure 22: Association between preterm-AGA (reference: term-AGA) and motor development. ....                                   | 28 |
| Figure 23: Association between term-SGA (reference: term-AGA) and motor development. ....                                      | 29 |
| Figure 24: Association between preterm-SGA (reference: term-AGA) and motor development.....                                    | 30 |
| Figure 25: Association between late preterm birth, 34-37 weeks (reference: term) and motor development.....                    | 31 |

|                                                                                                                                |    |
|--------------------------------------------------------------------------------------------------------------------------------|----|
| Figure 26: Association between early preterm birth, < 34 weeks (reference: term) and motor development.....                    | 32 |
| Figure 27: Association between moderate SGA (reference: AGA) and motor development.....                                        | 33 |
| Figure 28: Association between severe SGA (reference: AGA) and motor development.....                                          | 34 |
| Figure 29: Association between low birth weight (LBW) and (reference: normal birth weight) and language development. ....      | 35 |
| Figure 30: Association between moderately low birth weight and (reference: normal birth weight) and language development. .... | 36 |
| Figure 31: Association between very low birth weight and (reference: normal birth weight) and language development. ....       | 37 |
| Figure 32: Association between lack of access to clean water (reference: access to clean water) and language development. .... | 38 |
| Figure 33: Association between lack of access to sanitation (reference: access to sanitation) and language development. ....   | 39 |
| Figure 34: Association between preterm-AGA (reference: term-AGA) and language development.....                                 | 40 |
| Figure 35: Association between term-SGA (reference: term-AGA) and language development.....                                    | 41 |
| Figure 36: Association between late preterm birth, 34-37 weeks (reference: term) and language development.....                 | 42 |
| Figure 37: Association between early preterm birth, < 34 weeks (reference: term) and language development.....                 | 43 |
| Figure 38: Association between moderate SGA (reference: AGA) and language development. ....                                    | 44 |
| Figure 39: Association between severe SGA (reference: AGA) and language development. ....                                      | 45 |
| Figure 40: Association between no maternal education (reference: primary education) and cognitive development.....             | 46 |
| Figure 41: Association between maternal secondary education (reference: primary education) and cognitive development. ....     | 47 |
| Figure 42: Association between maternal higher education (reference: primary education) and cognitive development.....         | 48 |
| Figure 43: Association between no paternal education (reference: primary education) and cognitive development.....             | 49 |
| Figure 44: Association between paternal secondary education (reference: primary education) and cognitive development. ....     | 50 |
| Figure 45: Association between paternal higher education (reference: primary education) and cognitive development.....         | 51 |
| Figure 46: Association between maternal ages < 15 (reference: ages 20-34) and cognitive development. ....                      | 52 |
| Figure 47: Association between maternal ages 15-20 (reference: ages 20-34) and cognitive development.....                      | 53 |
| Figure 48: Association between maternal ages >35 (reference: ages 20-34) and cognitive development. ....                       | 54 |
| Figure 49: Association between maternal height < 145cm (reference: >155 cm) and cognitive development.....                     | 55 |

|                                                                                                                         |    |
|-------------------------------------------------------------------------------------------------------------------------|----|
| Figure 50: Association between maternal height 145-150cm (reference: >155 cm) and cognitive development.....            | 56 |
| Figure 51: Association between maternal height 150-155 cm (reference: >155 cm) and cognitive development.....           | 57 |
| Figure 52: Association between maternal BMI <18.5 kg/m <sup>2</sup> (reference: 18.5-25) and cognitive development..... | 58 |
| Figure 53: Association between maternal BMI 25-30 kg/m <sup>2</sup> (reference: 18.5-25) and cognitive development..... | 59 |
| Figure 54: Association between maternal BMI >30 kg/m <sup>2</sup> (reference: 18.5-25) and cognitive development.....   | 60 |
| Figure 55: Association between mild anemia in pregnancy (reference: no anemia) and cognitive development.....           | 61 |
| Figure 56: Association between maternal moderate anemia (reference: no anemia) and cognitive development.....           | 62 |
| Figure 57: Association between no maternal education (reference: primary education) and motor development.....          | 63 |
| Figure 58: Association between maternal secondary education (reference: primary education) and motor development.....   | 64 |
| Figure 59: Association between maternal higher education (reference: primary education) and motor development.....      | 65 |
| Figure 60: Association between no paternal education (reference: primary education) and motor development.....          | 66 |
| Figure 61: Association between paternal secondary education (reference: primary education) and motor development.....   | 67 |
| Figure 62: Association between paternal higher education (reference: primary education) and motor development.....      | 68 |
| Figure 63: Association between maternal ages < 15 (reference: ages 20-34) and motor development. ...                    | 69 |
| Figure 64: Association between maternal ages 15-20 (reference: ages 20-34) and motor development. ...                   | 70 |
| Figure 65: Association between maternal ages >35 (reference: ages 20-34) and motor development. ...                     | 71 |
| Figure 66: Association between maternal height <145 (reference: >155 cm) and motor development... ..                    | 72 |
| Figure 67: Association between maternal height 145-150 (reference: >155 cm) and motor development. ....                 | 73 |
| Figure 68: Association between maternal height 150-155 (reference: >155 cm) and motor development. ....                 | 74 |
| Figure 69: Association between maternal BMI <18.5 kg/m <sup>2</sup> (reference: 18.5-25) and motor development. ....    | 75 |
| Figure 70: Association between maternal BMI <25-30 kg/m <sup>2</sup> (reference: 18.5-25) and motor development.....    | 76 |
| Figure 71: Association between maternal BMI >30 kg/m <sup>2</sup> (reference: 18.5-25) and motor development. ....      | 77 |
| Figure 72: Association between maternal mild anemia (reference: no anemia) and motor development .....                  | 78 |

|                                                                                                                           |    |
|---------------------------------------------------------------------------------------------------------------------------|----|
| Figure 73: Association between maternal moderate anemia (reference: no anemia) and motor development.....                 | 79 |
| Figure 74: Association between no maternal education (reference: primary education) and language development.....         | 80 |
| Figure 75: Association between maternal secondary education (reference: primary education) and language development. .... | 81 |
| Figure 76: Association between maternal higher education (reference: primary education) and language development.....     | 82 |
| Figure 77: Association between no paternal education (reference: primary education) and language development.....         | 83 |
| Figure 78: Association between paternal secondary education (reference: primary education) and language development. .... | 84 |
| Figure 79: Association between paternal higher education (reference: primary education) and language development.....     | 85 |
| Figure 80: Association between maternal ages 15-20 (reference: ages 20-34) and language development. ....                 | 86 |
| Figure 81: Association between maternal ages >35 (reference: ages 20-34) and language development. ....                   | 87 |
| Figure 82: Association between maternal height <145 cm (reference: >155 cm) and language development.....                 | 88 |
| Figure 83: Association between maternal height 145-150cm (reference: >155 cm) and language development.....               | 89 |
| Figure 84: Association between maternal height 150-155 cm (reference: >155 cm) and language development.....              | 90 |
| Figure 85: Association between maternal BMI 25-30 kg/m <sup>2</sup> (reference: 18.5-25) and language development.....    | 91 |
| Figure 86: Association between maternal BMI >30 kg/m <sup>2</sup> (reference: 18.5-25) and language development.....      | 92 |

### 1. Child Risk Factors on Child's Cognitive Development

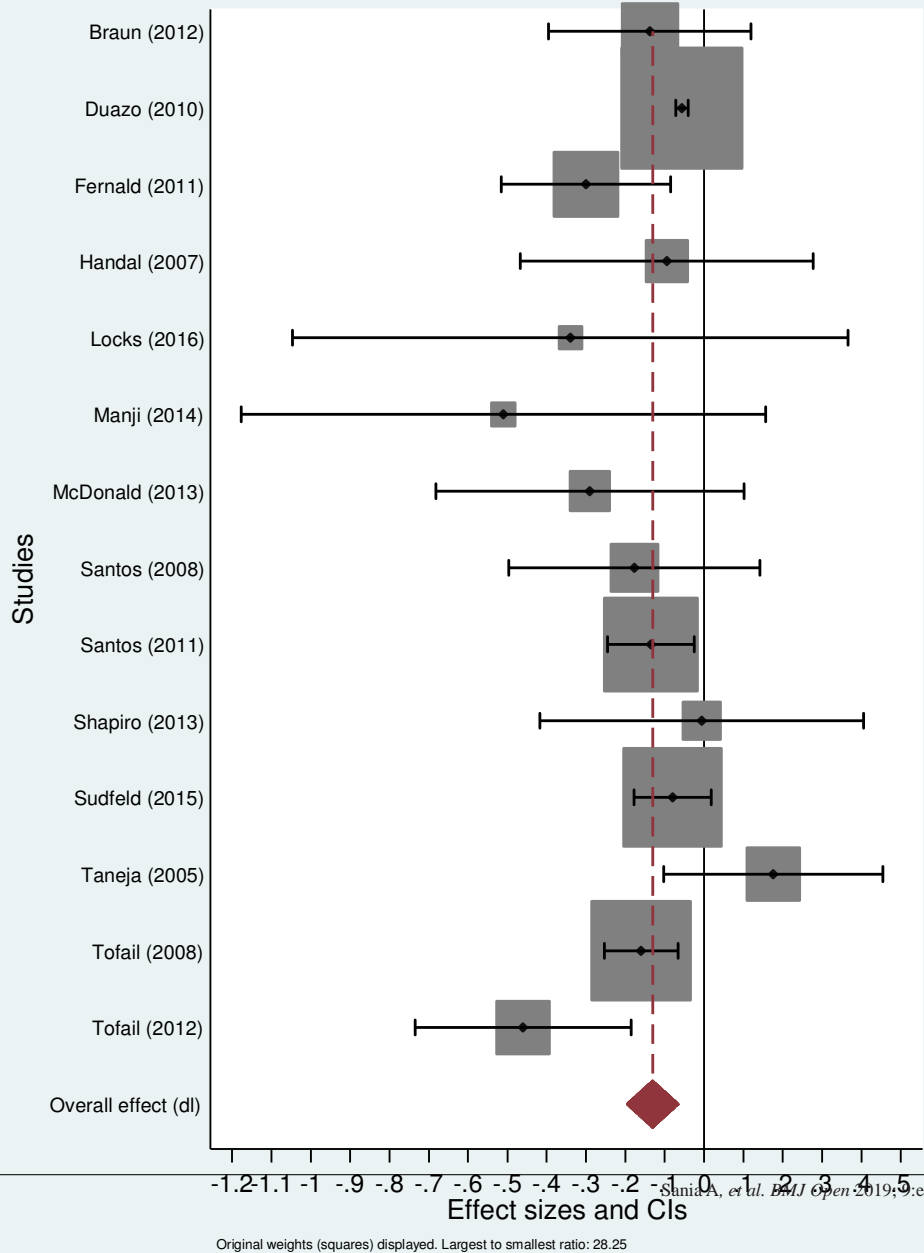

Figure 1: Association between low birth weight (LBW) and (reference: normal birth weight) and cognitive development.

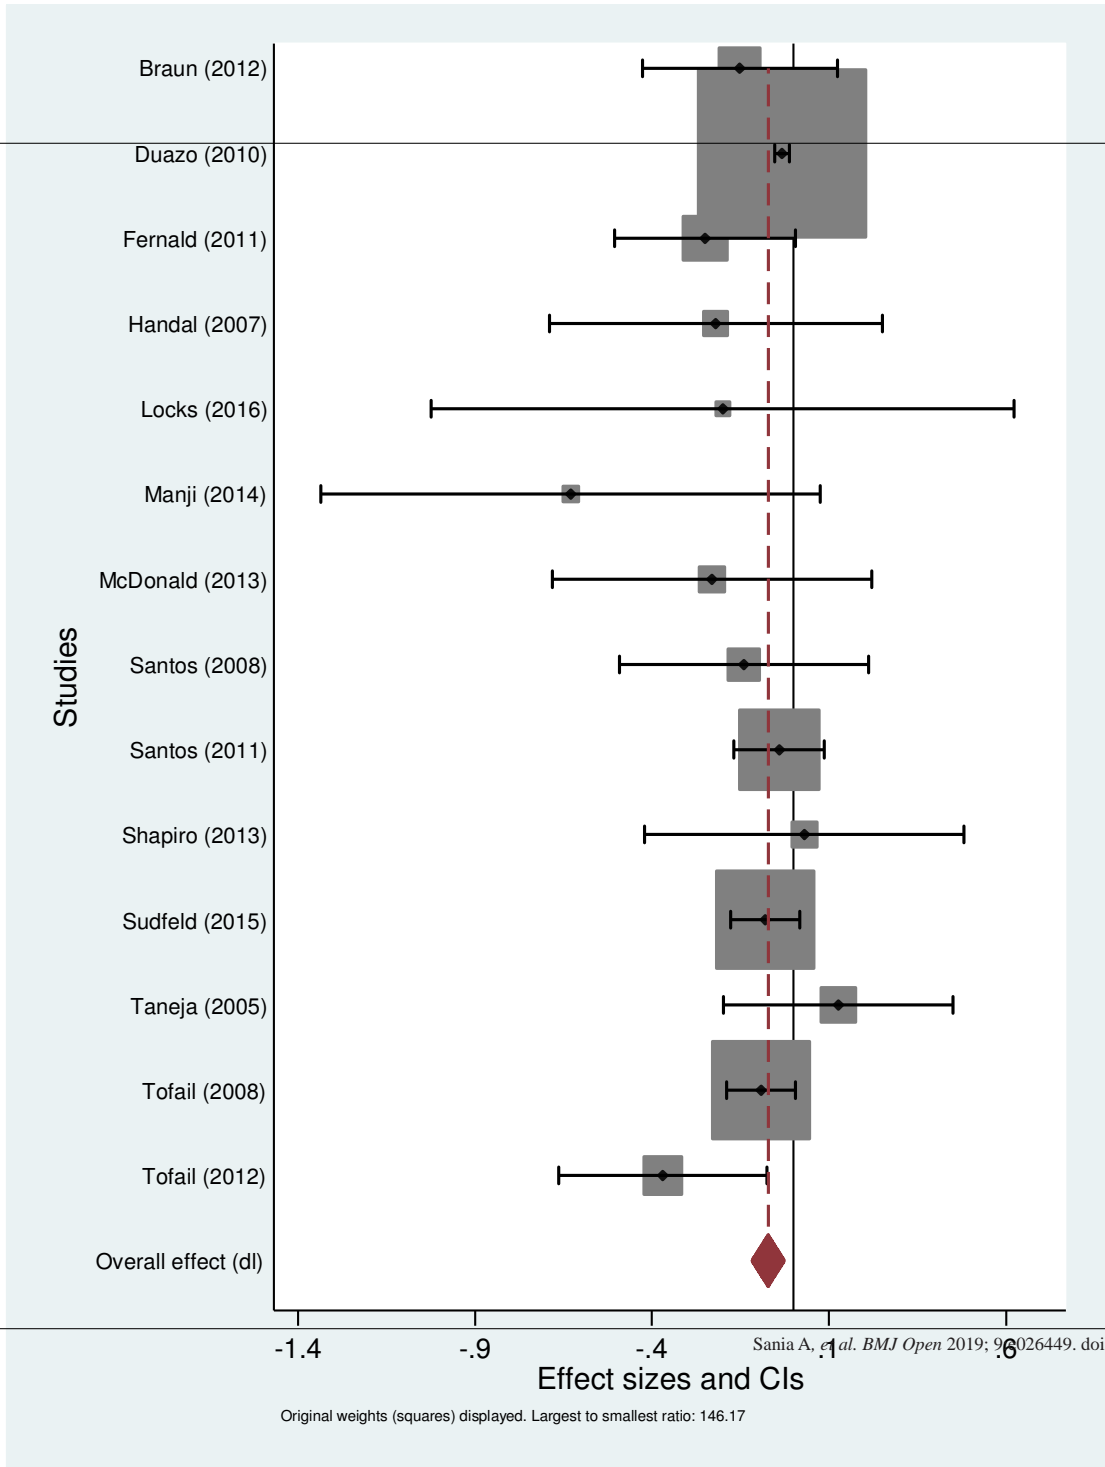

Sania A, et al. *BMJ Open* 2019; 9:e026449. doi: 10.1136/bmjopen-2018-026449

Figure 2: Association between Moderately low birth Weight (reference, normal birth weight) and cognitive development.



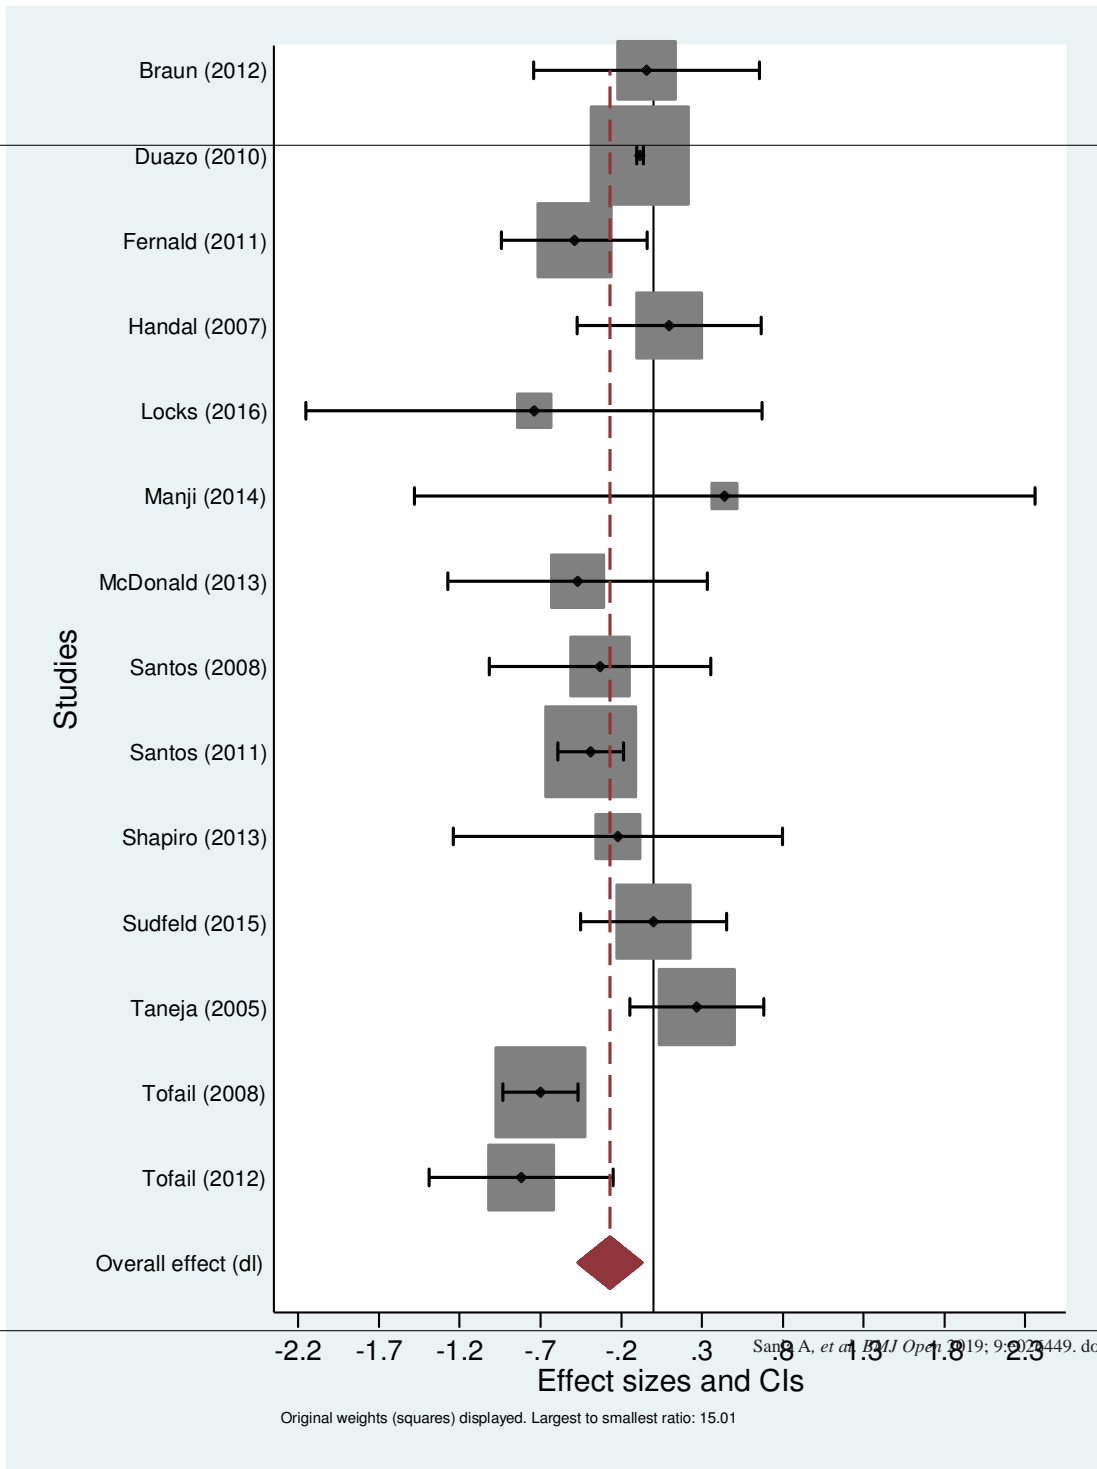

Figure 3: Association between very low Birth weight (reference: normal birth weight) and cognitive development.

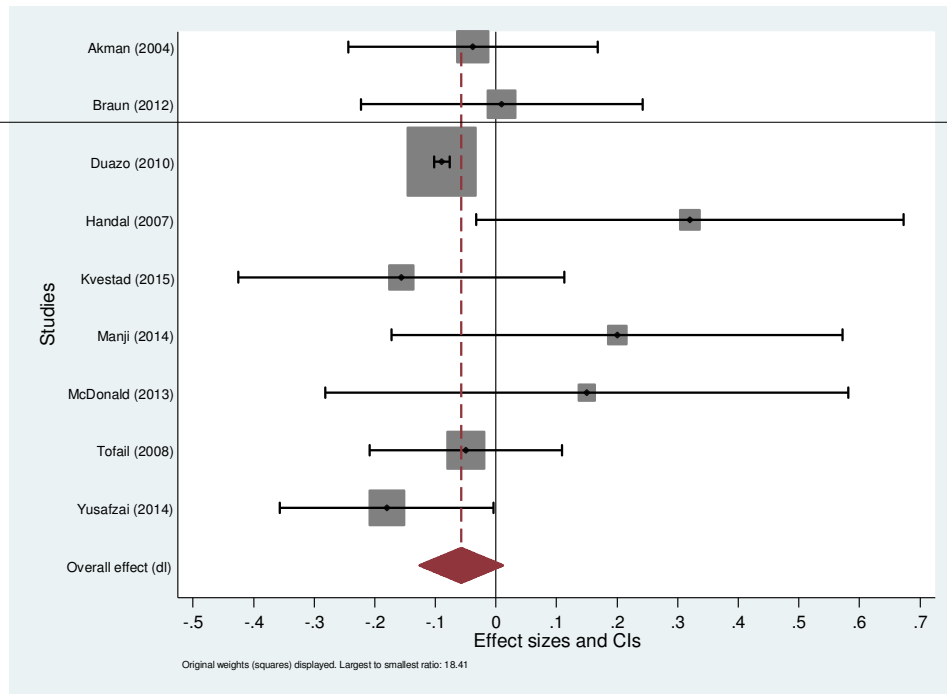

**Figure 4: Association between child mild anemia (reference: no anemia) and cognitive development.**

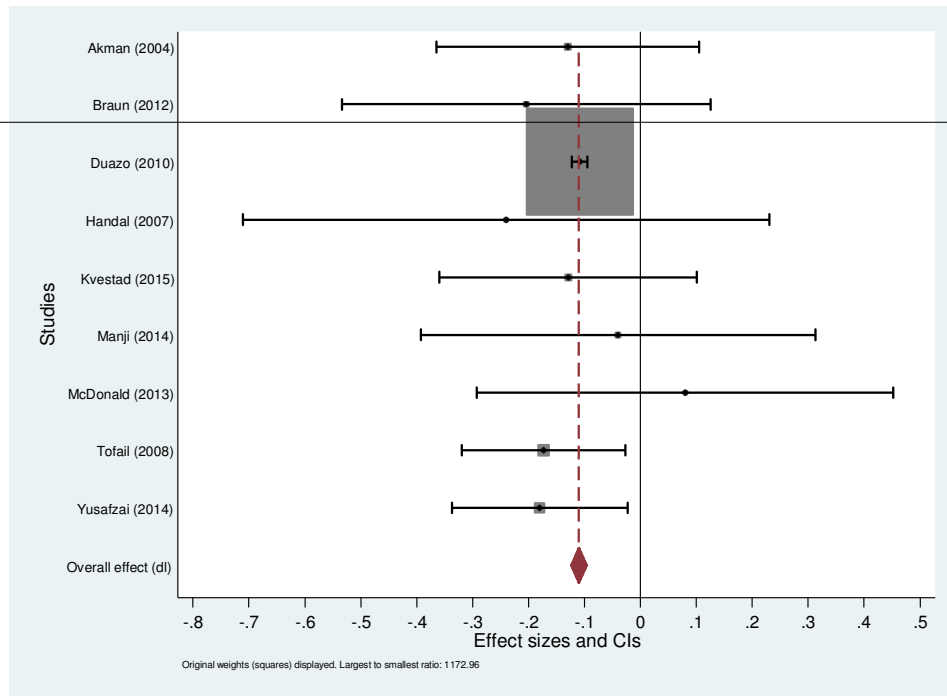

Figure 5: Association between child moderate anemia (reference: no anemia) and cognitive development.

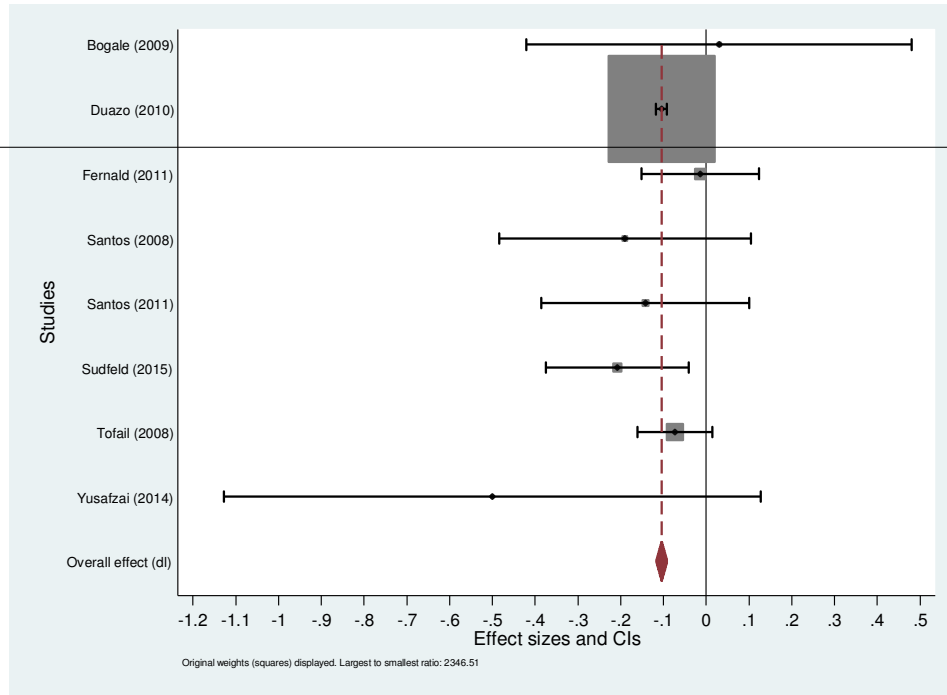

Figure 6: Association between lack of access to clean water (reference: access to clean water) and cognitive development.

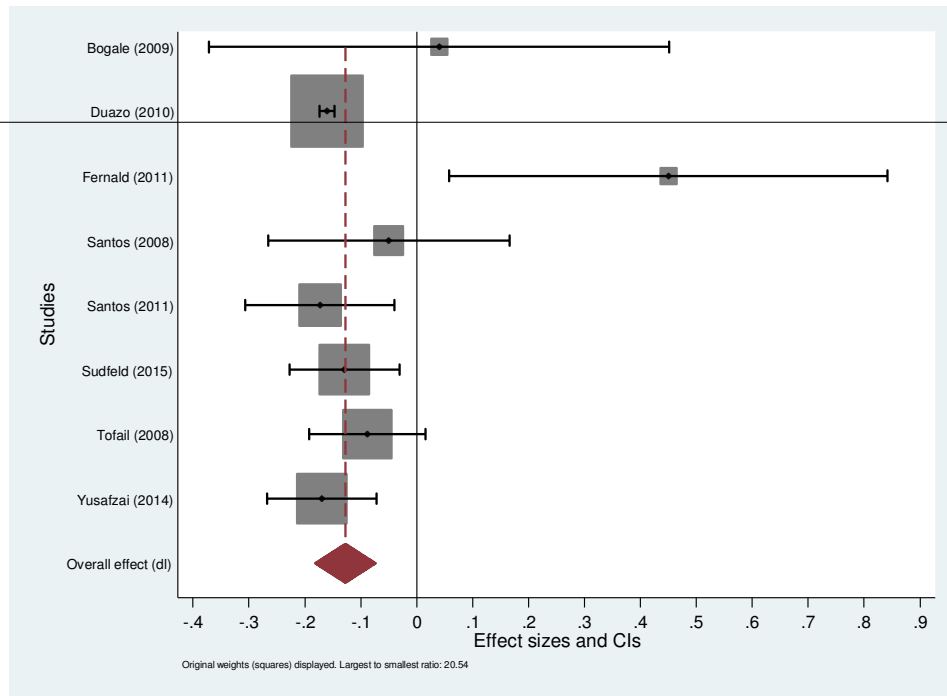

**Figure 7: Association between lack of access to sanitation (reference: access to sanitation) and cognitive development.**

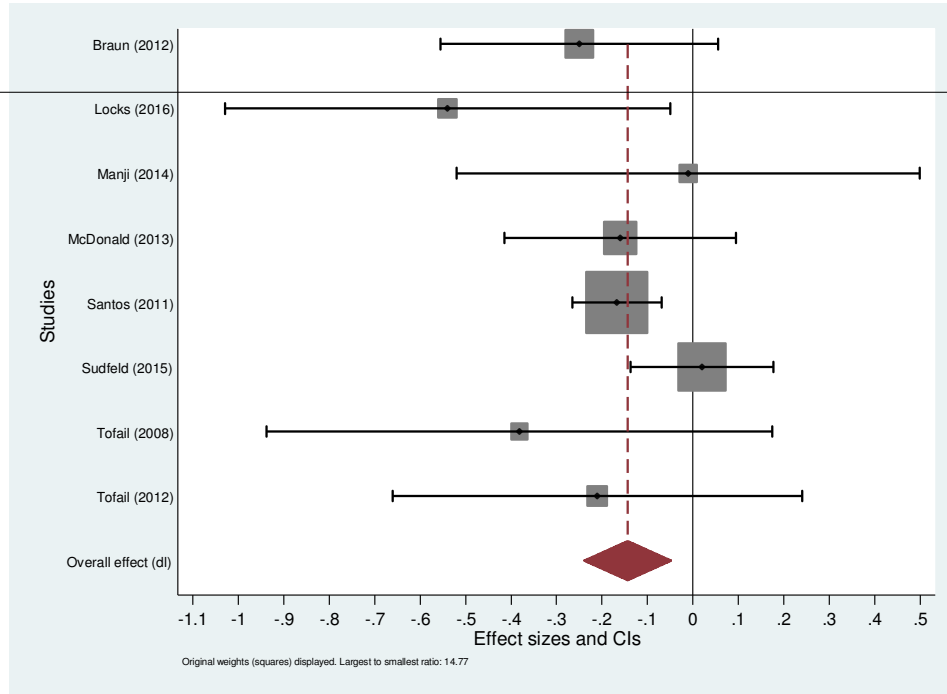

Figure 8: Association between preterm-AGA (reference: term-AGA) and cognitive development.

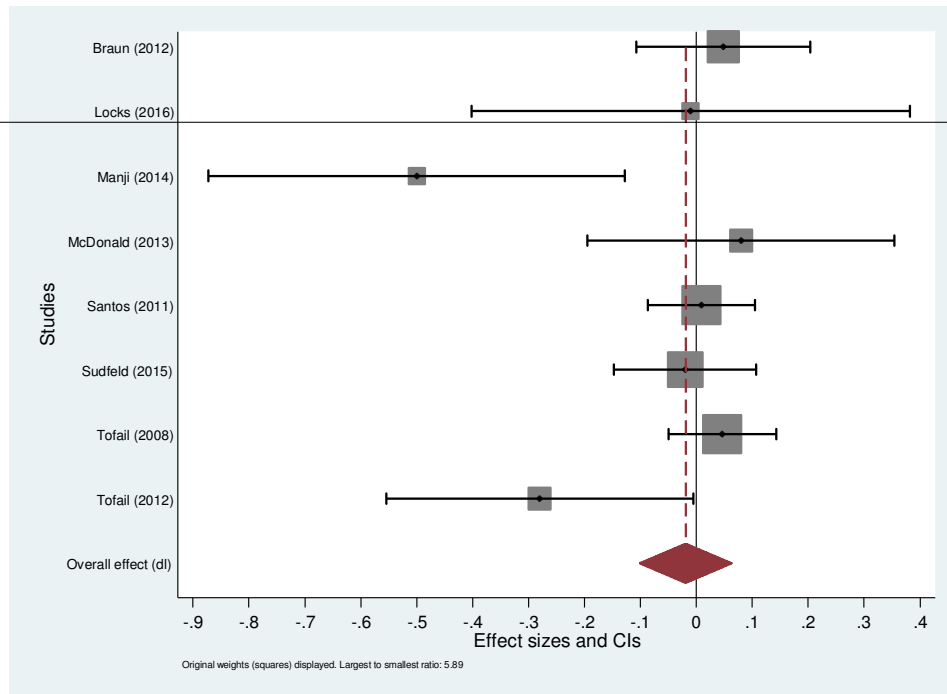

**Figure 9: Association between term-SGA (reference: term-AGA) and cognitive development.**

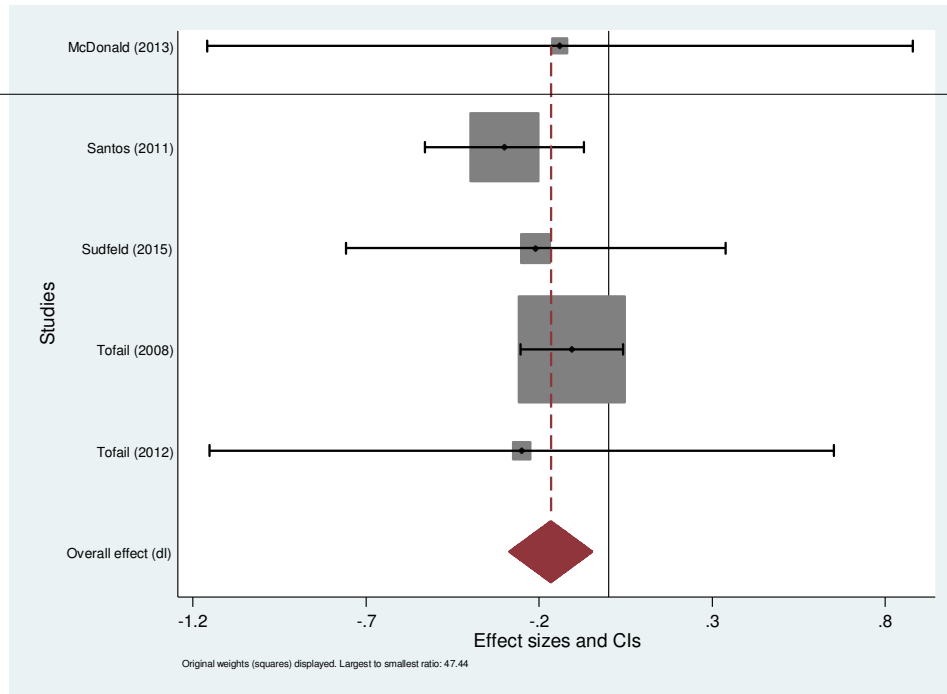

Figure 10: Association between preterm-SGA (reference: term-AGA) and cognitive development.



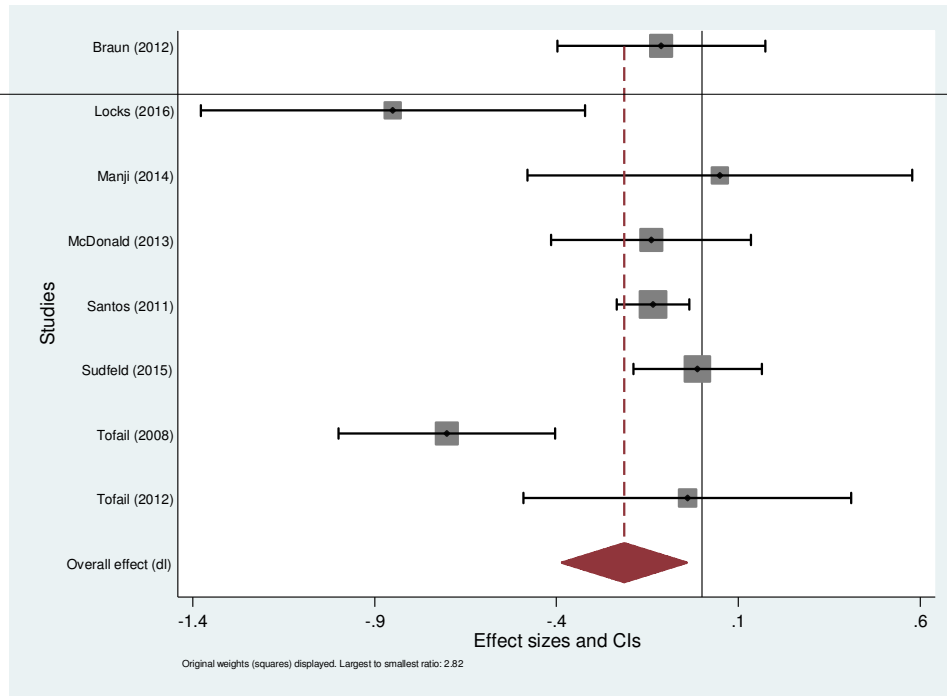

Figure 11: Association between late preterm birth, 34-37 weeks (reference: term) and cognitive development.

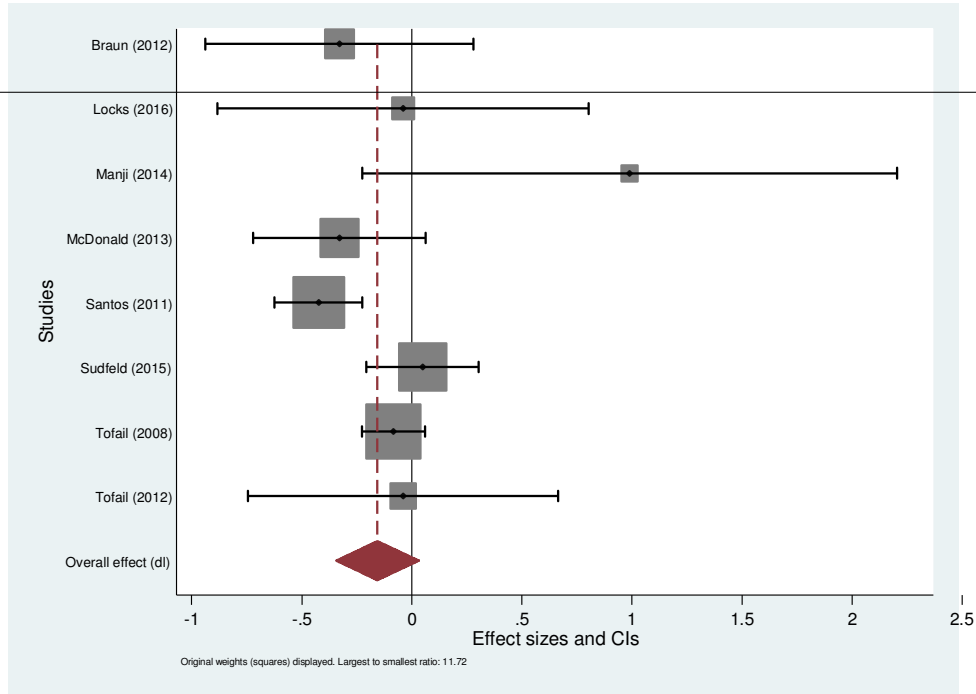

Figure 12: Association between early preterm birth, < 34 weeks (reference: term) and cognitive development.

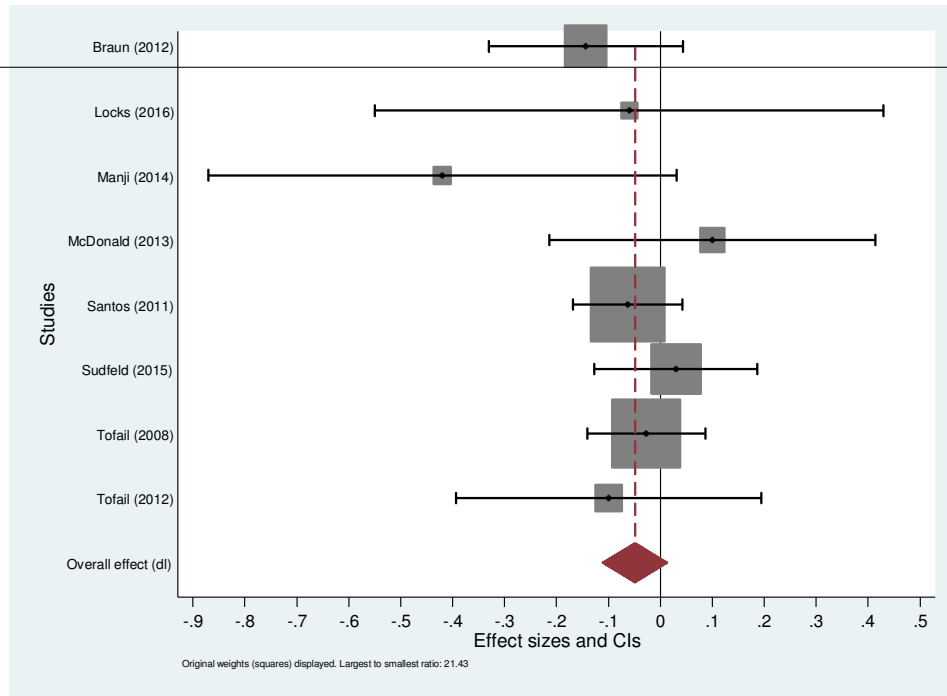

Figure 13: Association between moderate SGA (reference: AGA) and cognitive development.

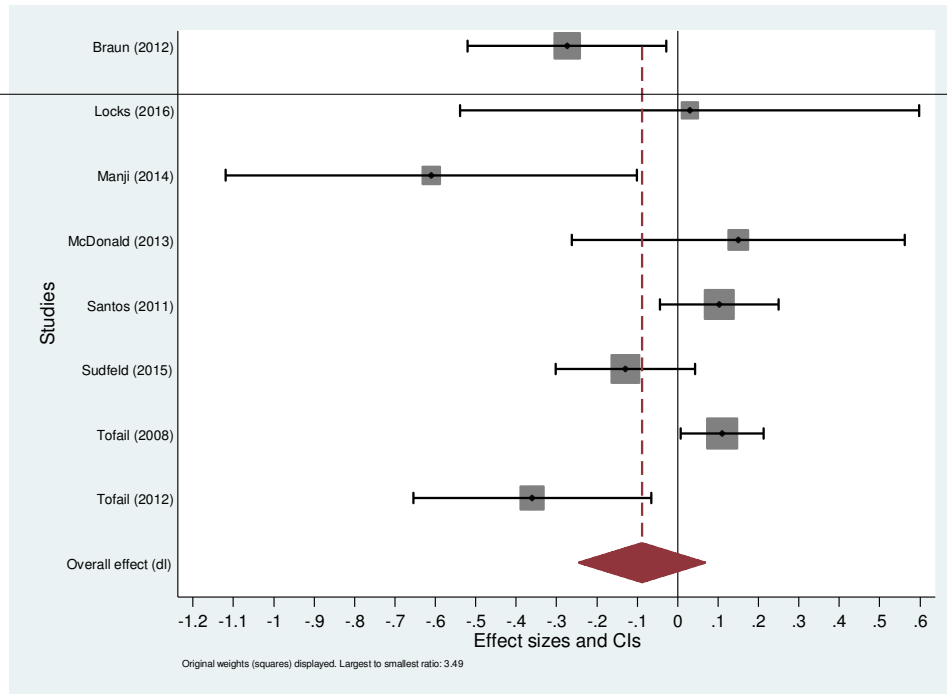

**Figure 14: Association between severe SGA (reference: AGA) and cognitive development.**

## 2. Child Risk Factors on Child's Motor Development

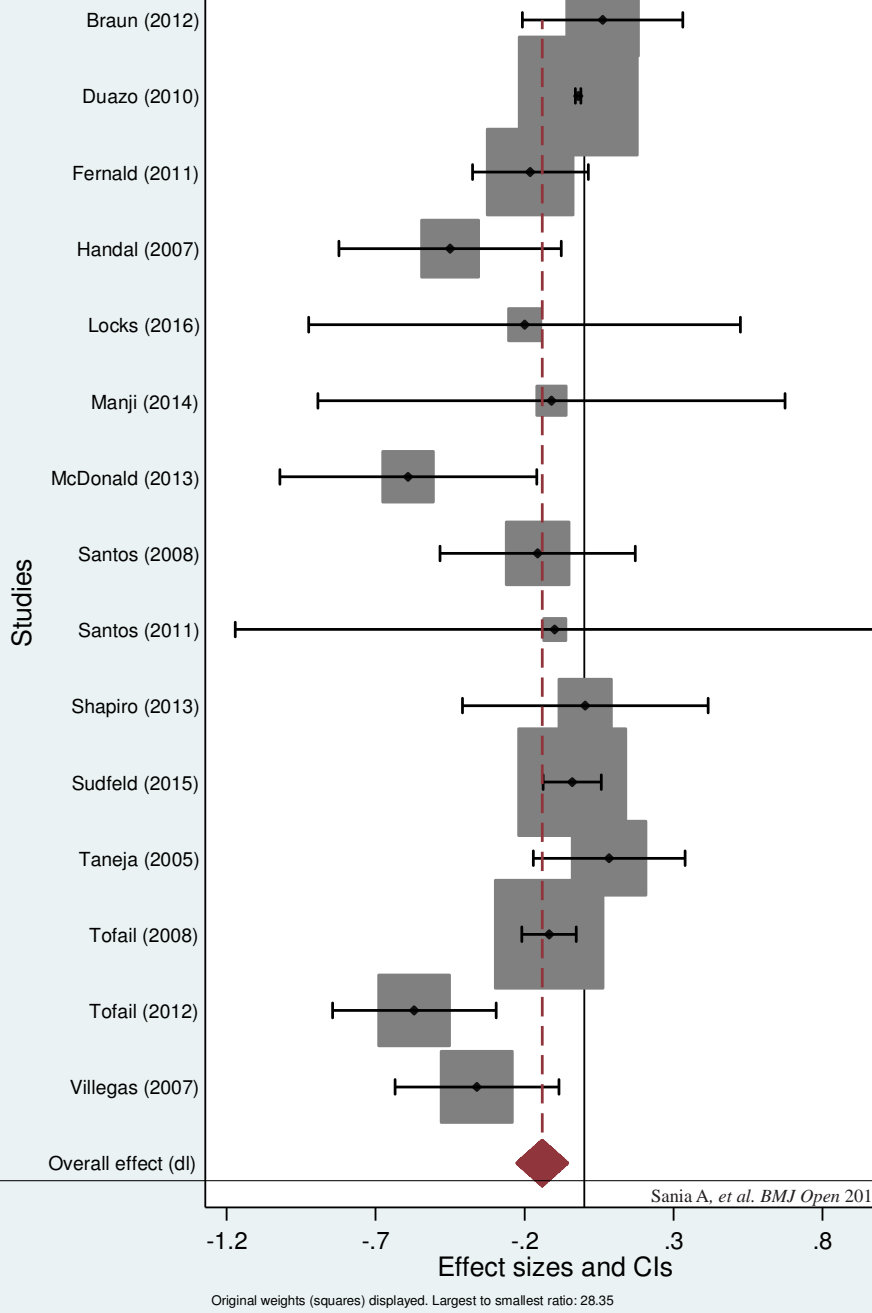

Sania A, et al. *BMJ Open* 2019; 9:e026449. doi: 10.1136/bmjopen-2018-026449

Figure 15: Association between low birth weight (reference: normal birth weight) and motor development.

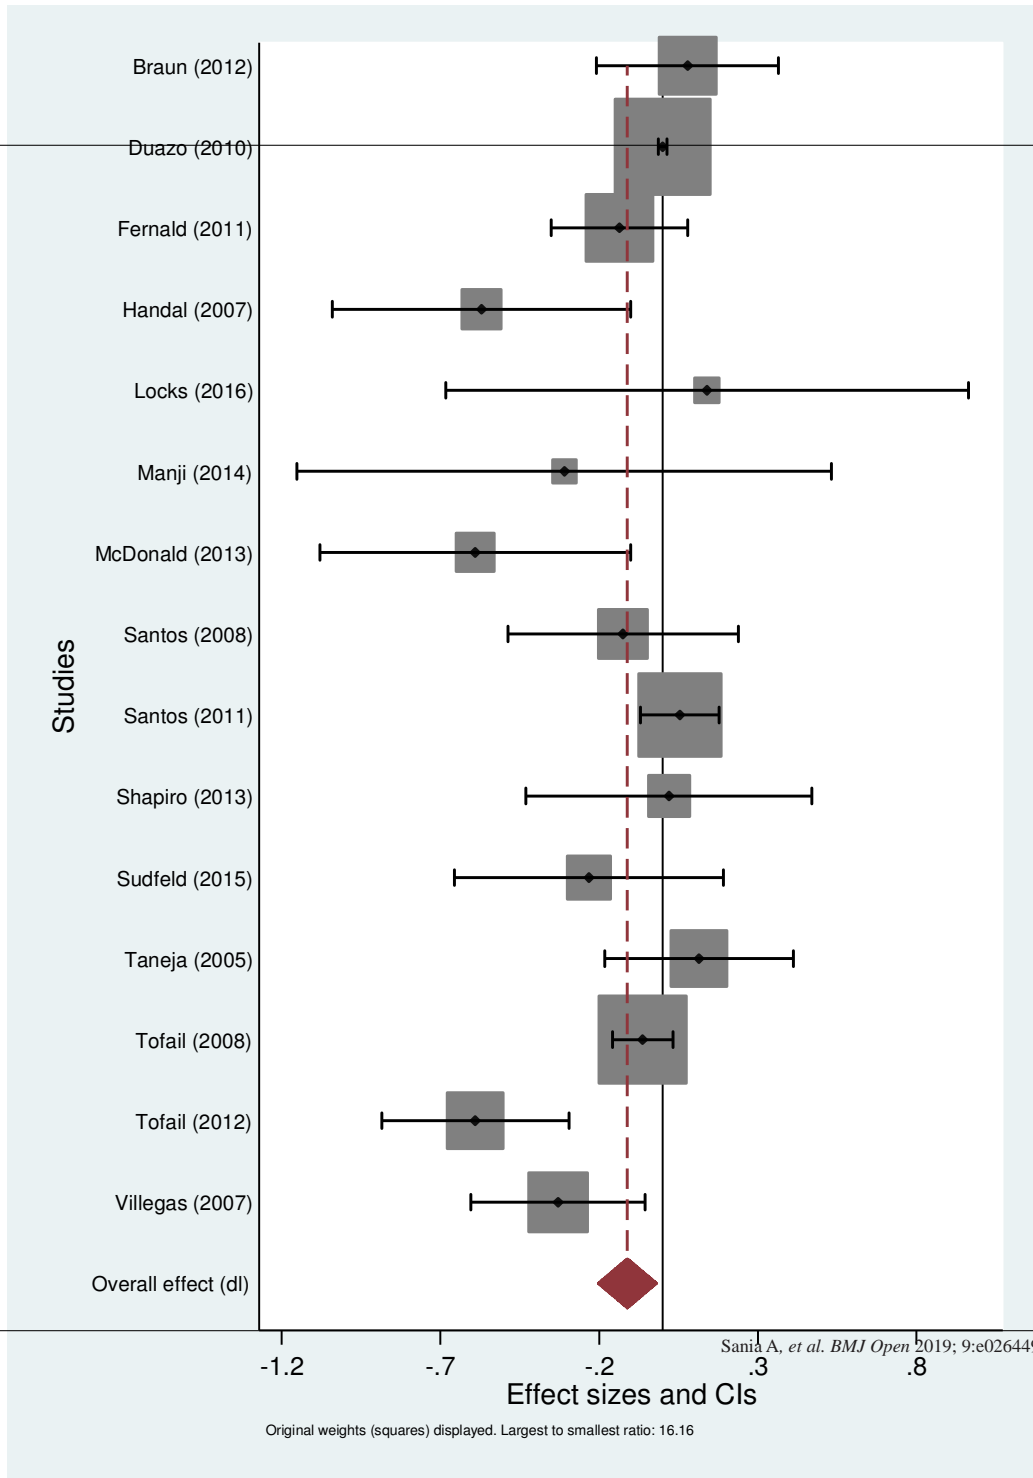

Figure 16: Association between moderately low birth weight (reference: normal birth weight) and motor development.

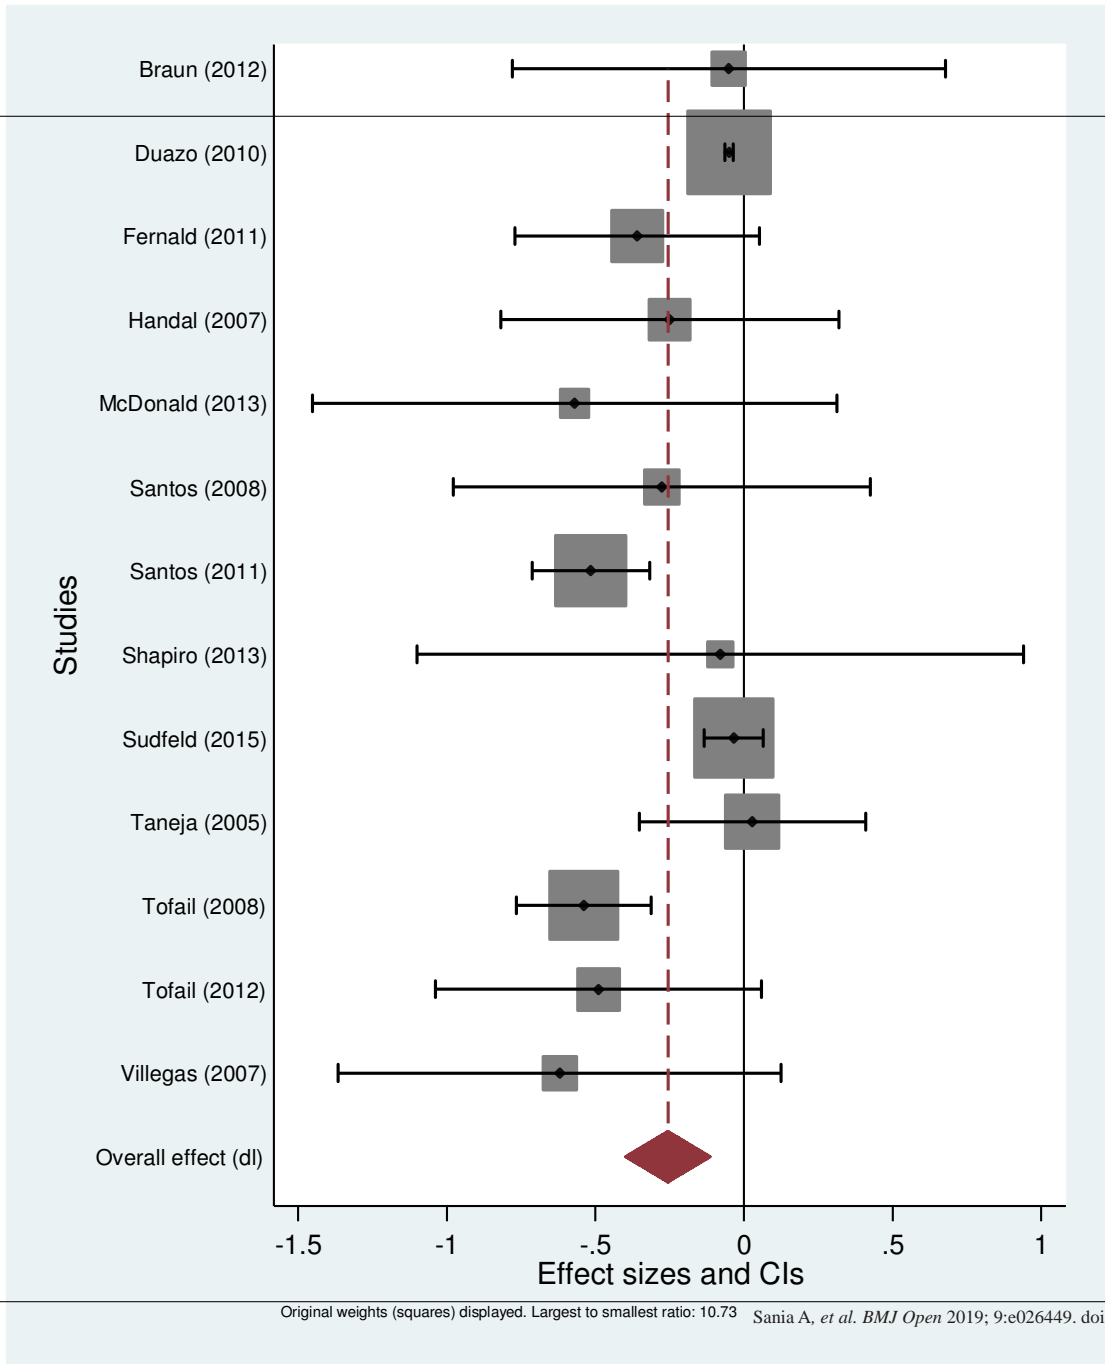

Figure 17: Association between very low birth weight (reference: normal birth weight) and motor development.

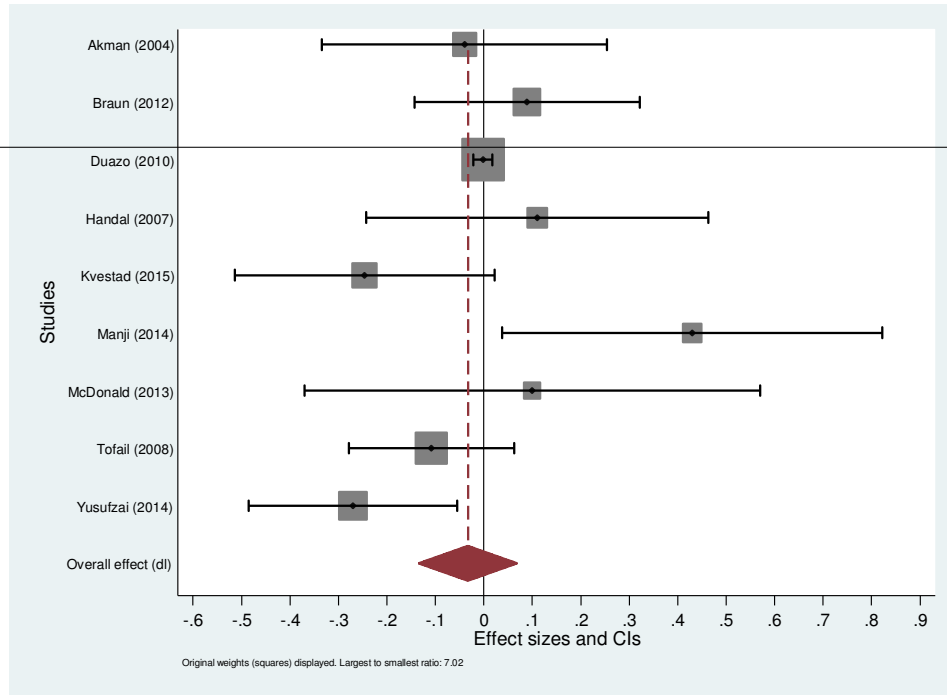

Figure 18: Association between child mild anemia (reference: no anemia) and motor development.



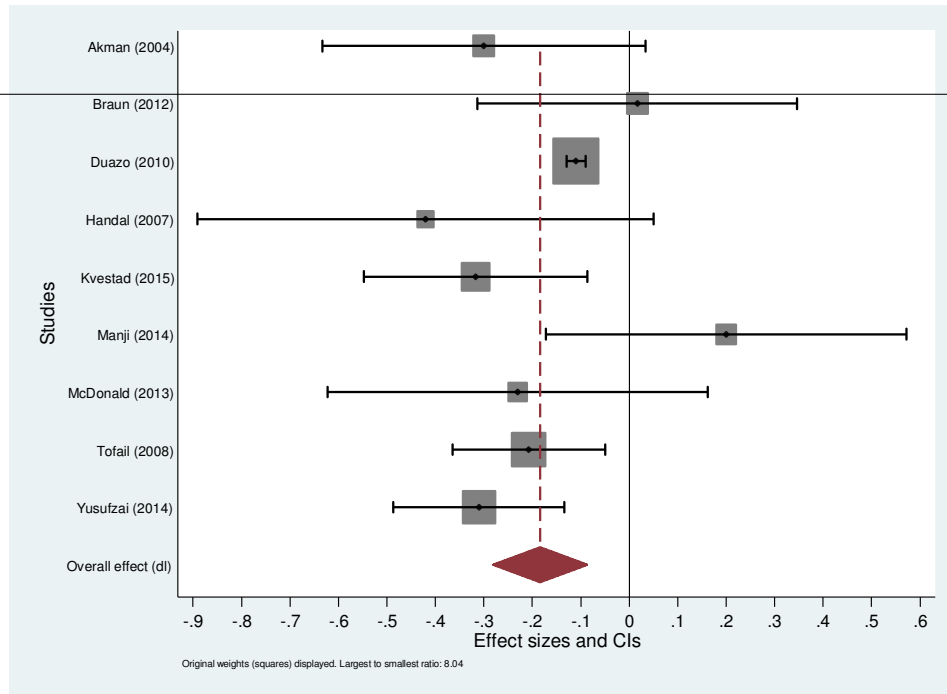

**Figure 19: Association between child moderate anemia (reference: no anemia) and motor development.**

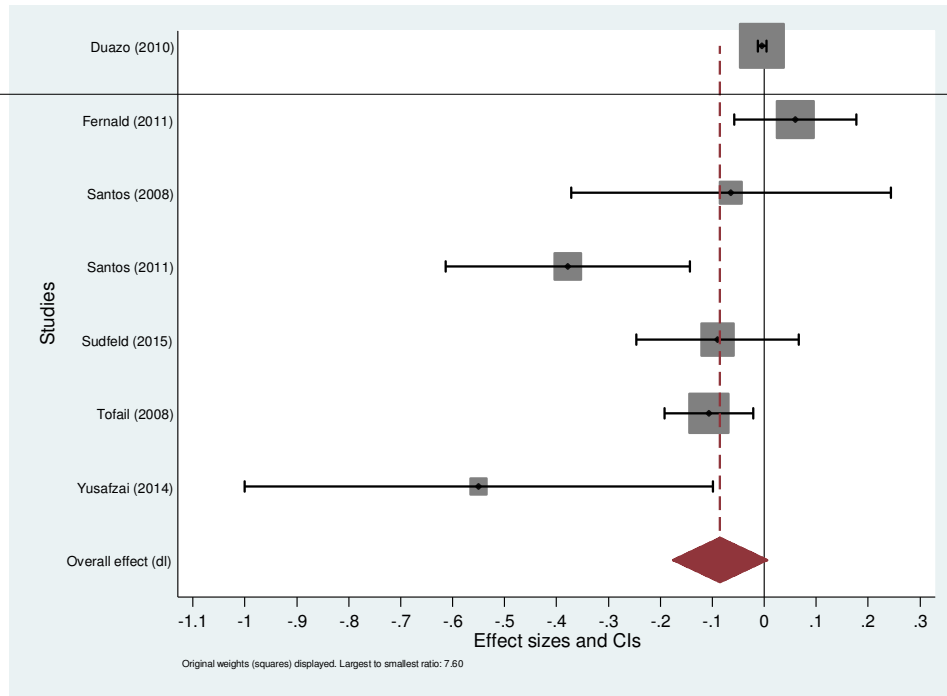

Figure 20: Association between lack of access to clean water (reference: access to clean water) and motor development.

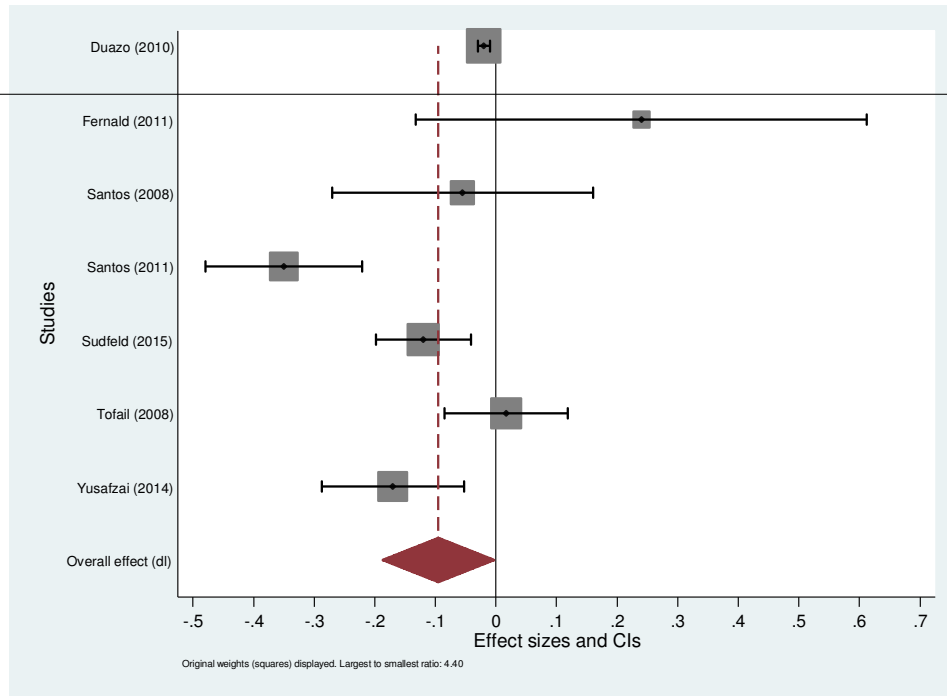

Figure 21: Association between lack of access to sanitation (reference: access to sanitation) and motor development.

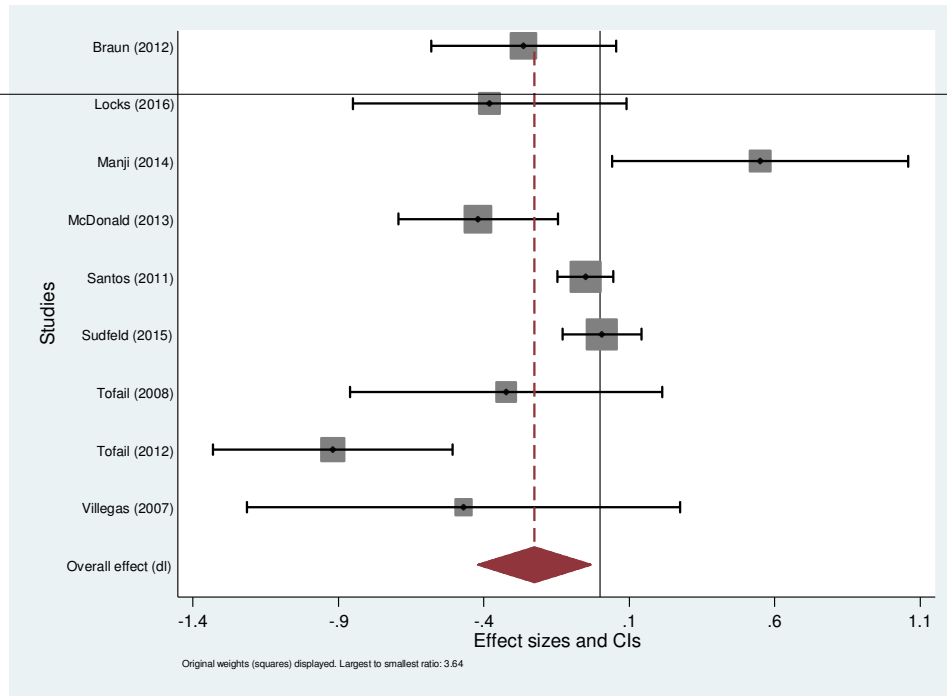

**Figure 22: Association between preterm-AGA (reference: term-AGA) and motor development.**

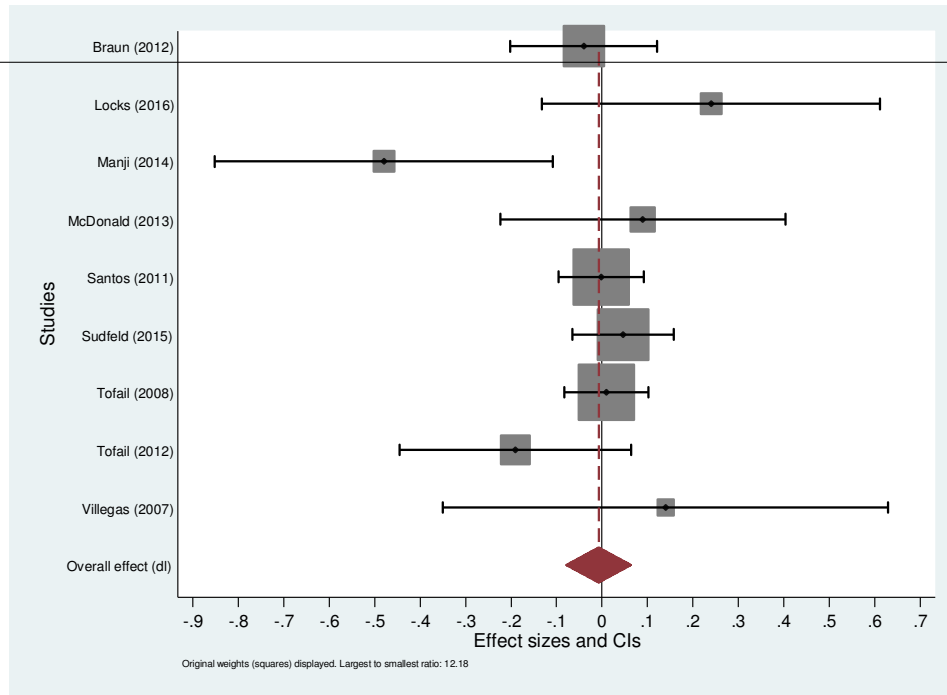

**Figure 23: Association between term-SGA (reference: term-AGA) and motor development.**

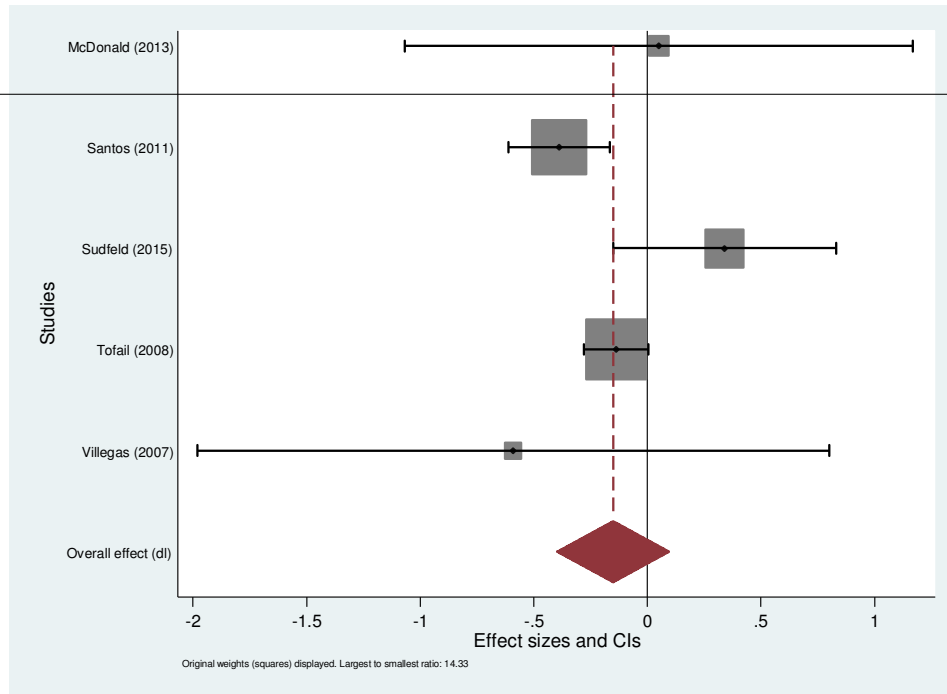

Figure 24: Association between preterm-SGA (reference: term-AGA) and motor development.

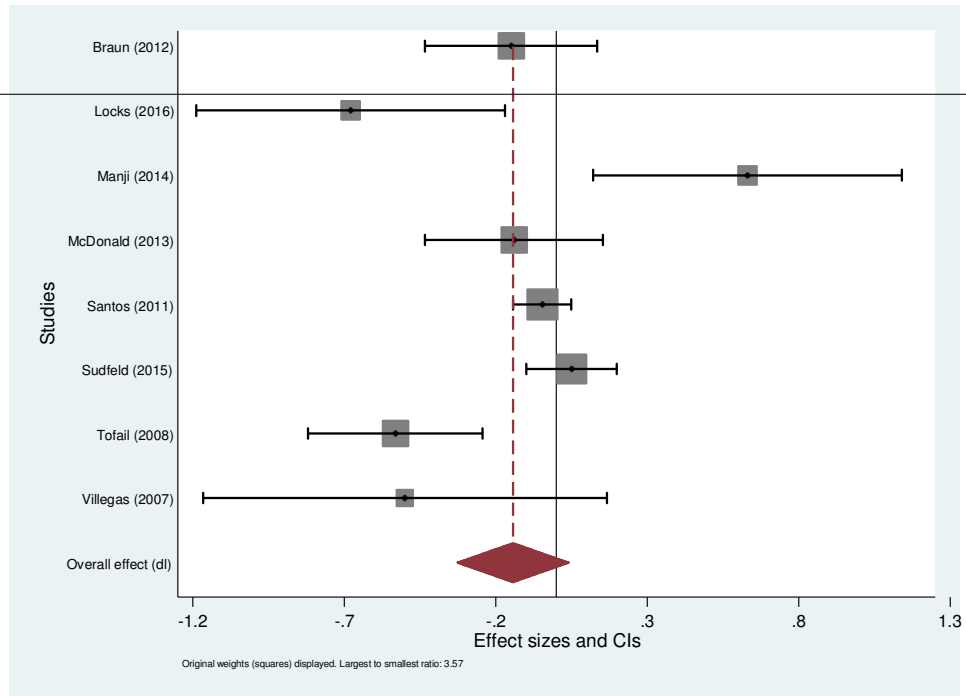

Figure 25: Association between late preterm birth, 34-37 weeks (reference: term) and motor development.

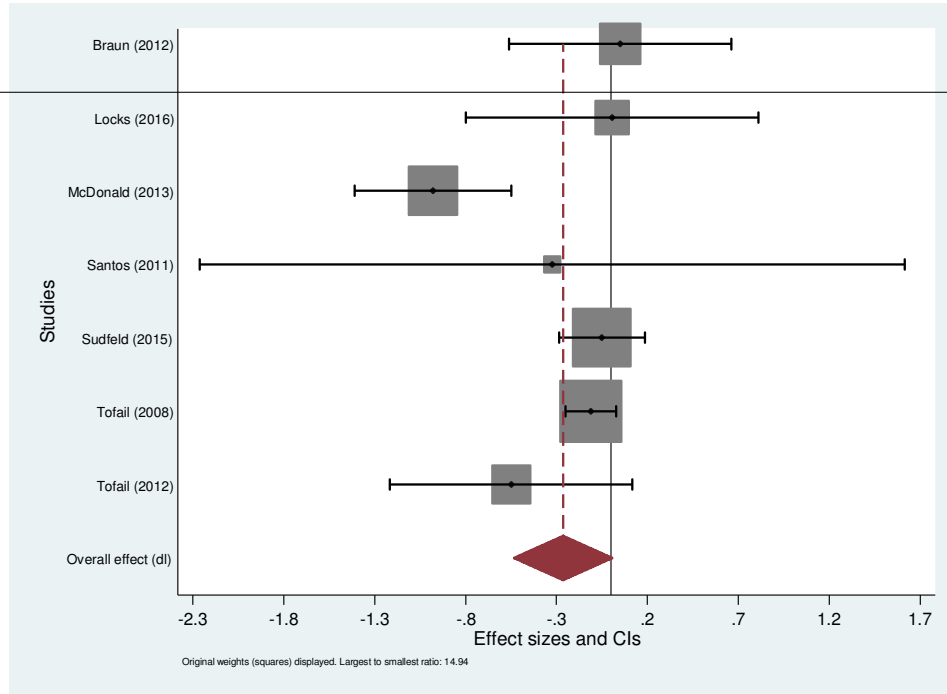

Figure 26: Association between early preterm birth, < 34 weeks (reference: term) and motor development.



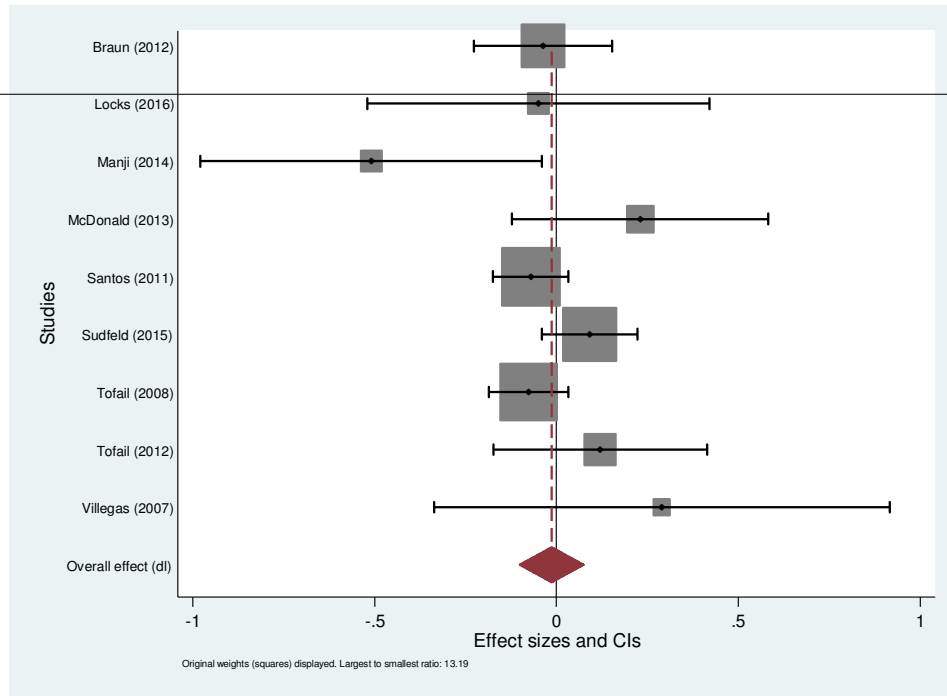

**Figure 27: Association between moderate SGA (reference: AGA) and motor development.**

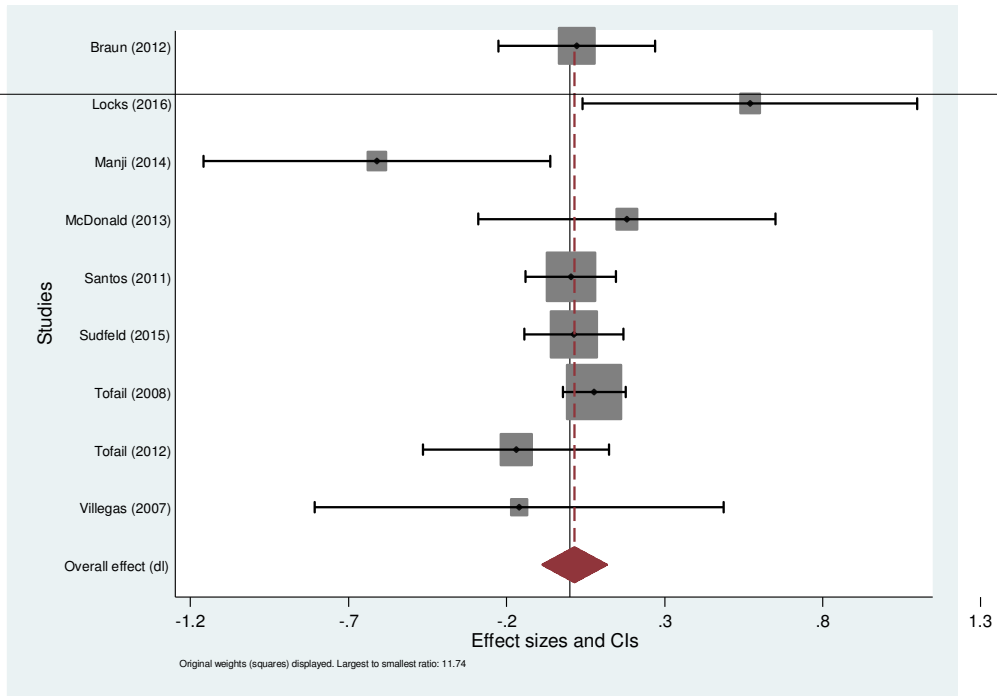

Figure 28: Association between severe SGA (reference: AGA) and motor development.

### 3. Child Risk Factors on Child's Language Development

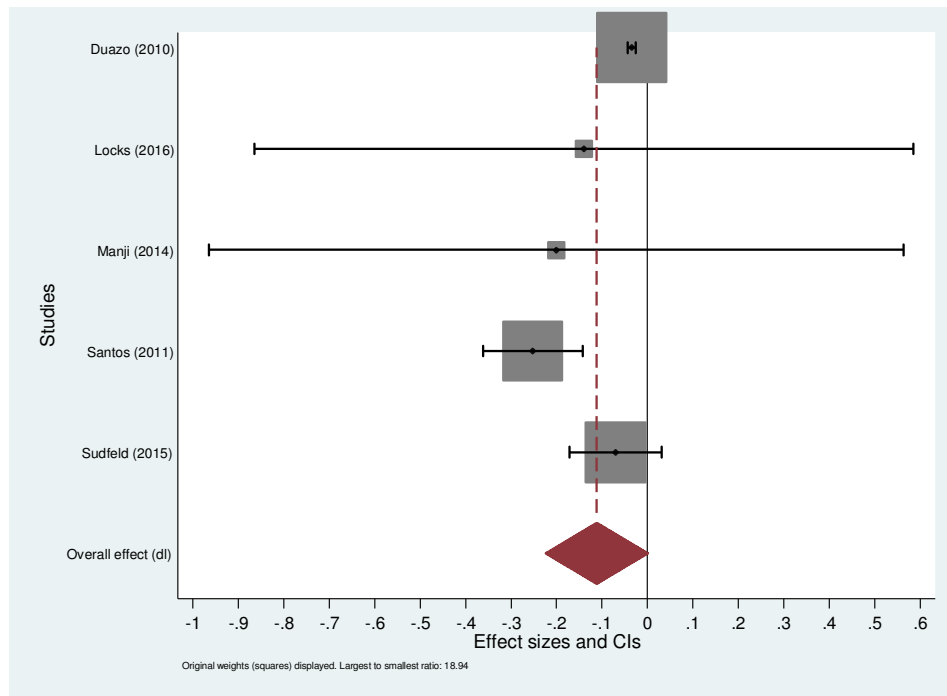

**Figure 29: Association between low birth weight (LBW) and (reference: normal birth weight) and language development.**

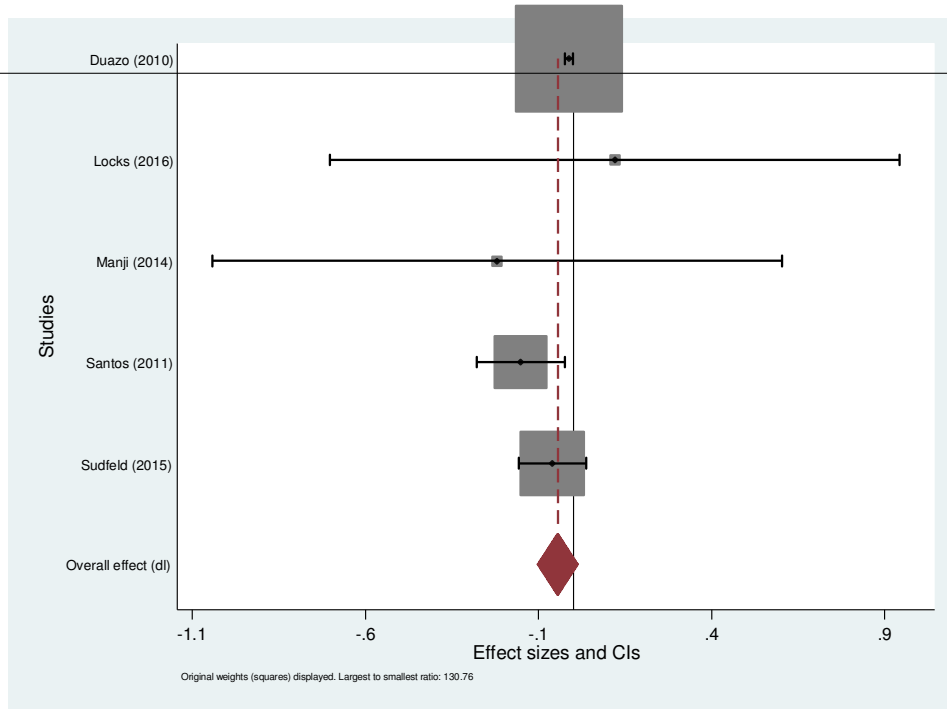

**Figure 30: Association between moderately low birth weight and (reference: normal birth weight) and language development.**

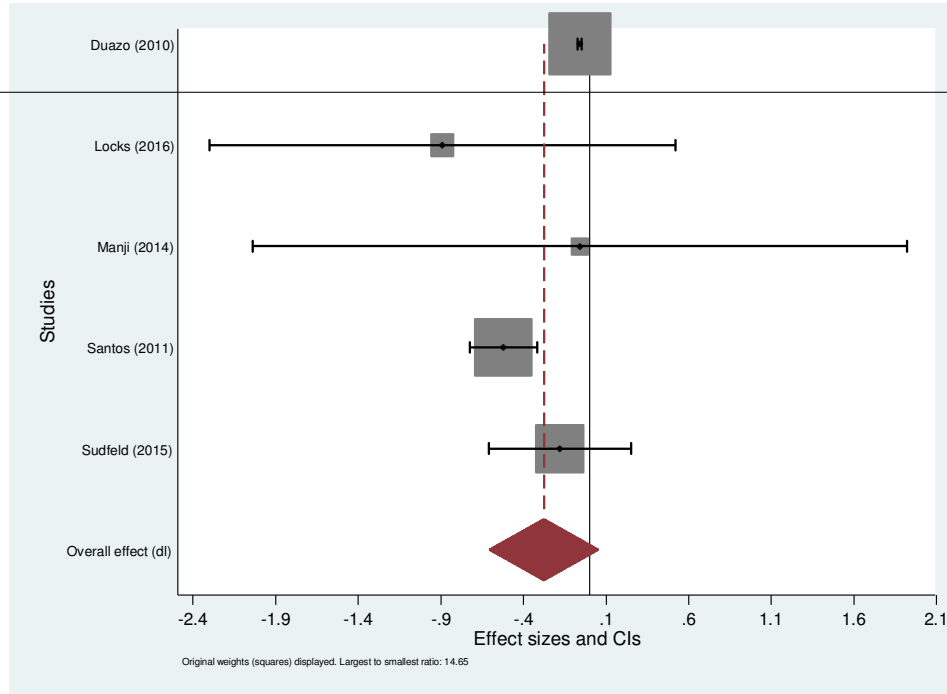

Figure 31: Association between very low birth weight and (reference: normal birth weight) and language development.

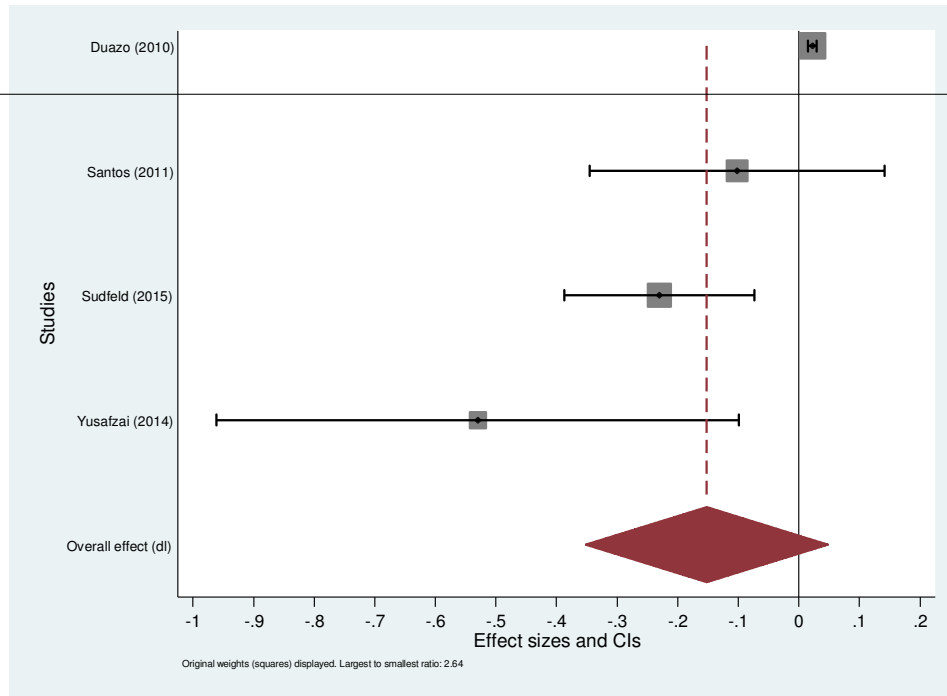

**Figure 32: Association between lack of access to clean water (reference: access to clean water) and language development.**

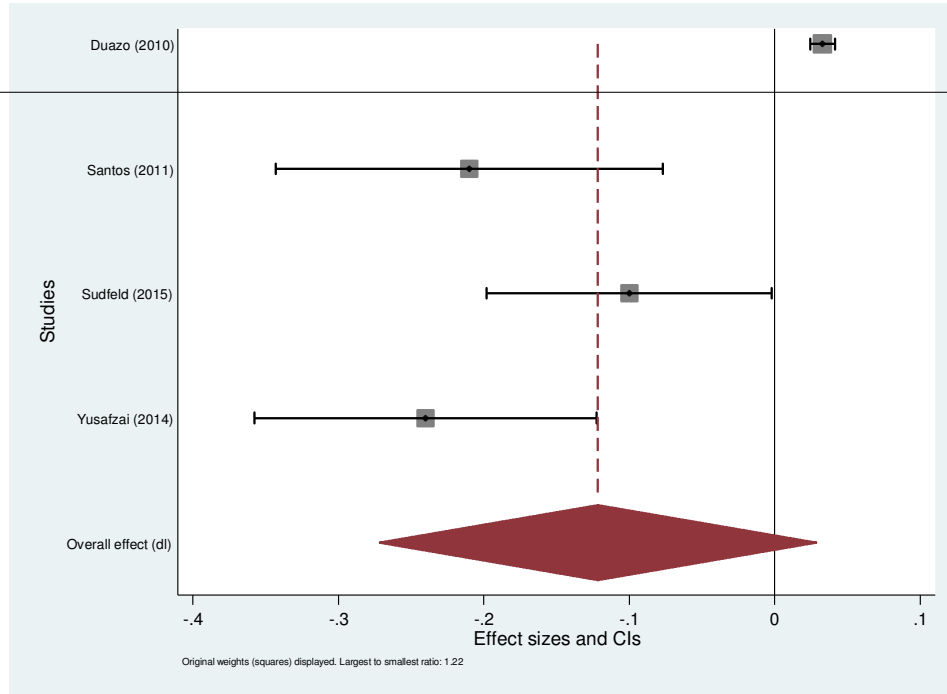

Figure 33: Association between lack of access to sanitation (reference: access to sanitation) and language development.

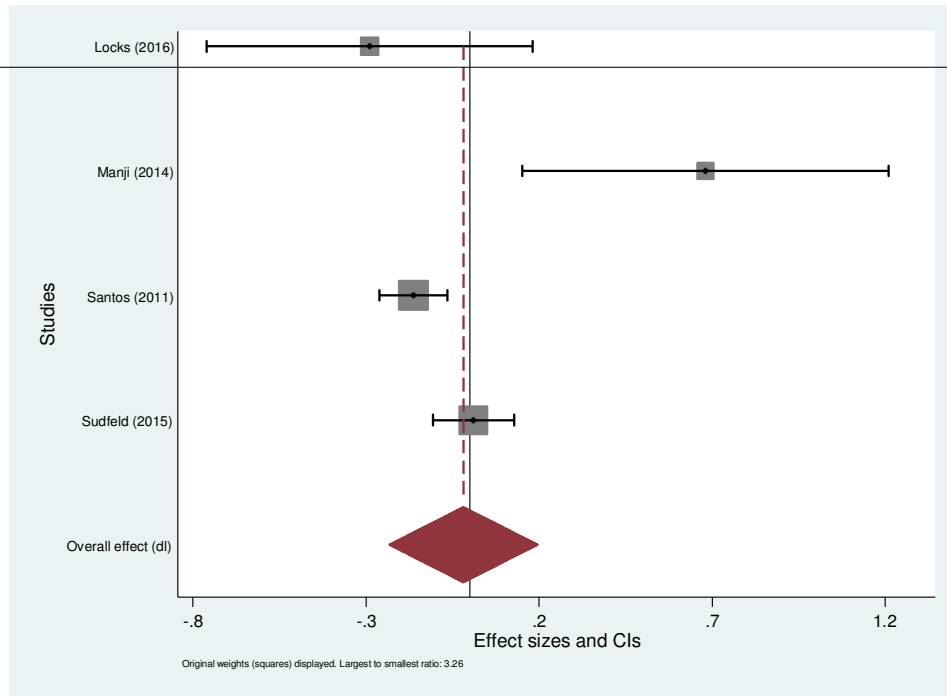

Figure 34: Association between preterm-AGA (reference: term-AGA) and language development.



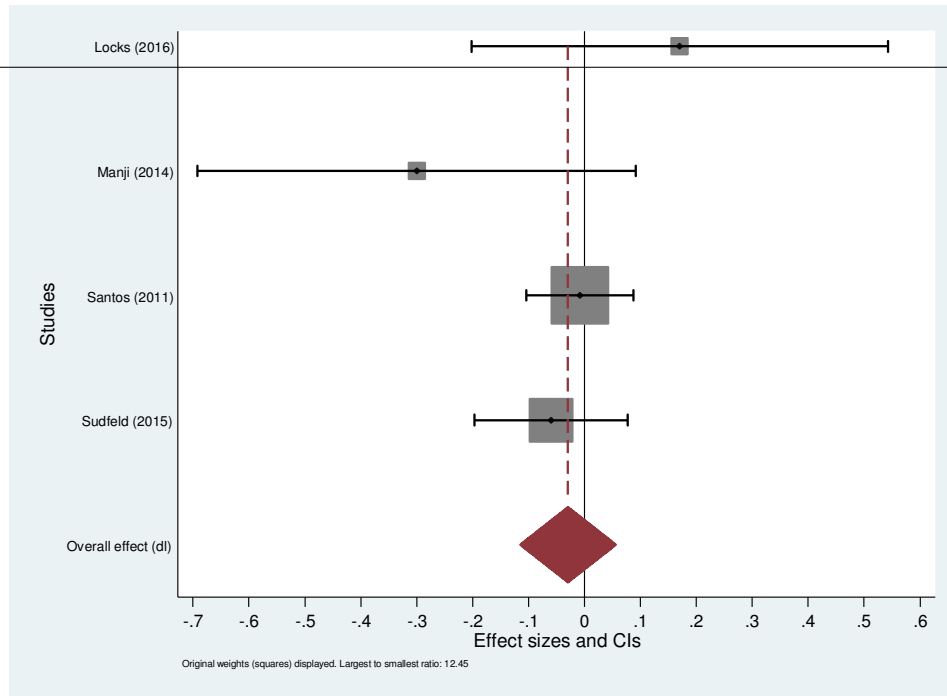

Figure 35: Association between term-SGA (reference: term-AGA) and language development.

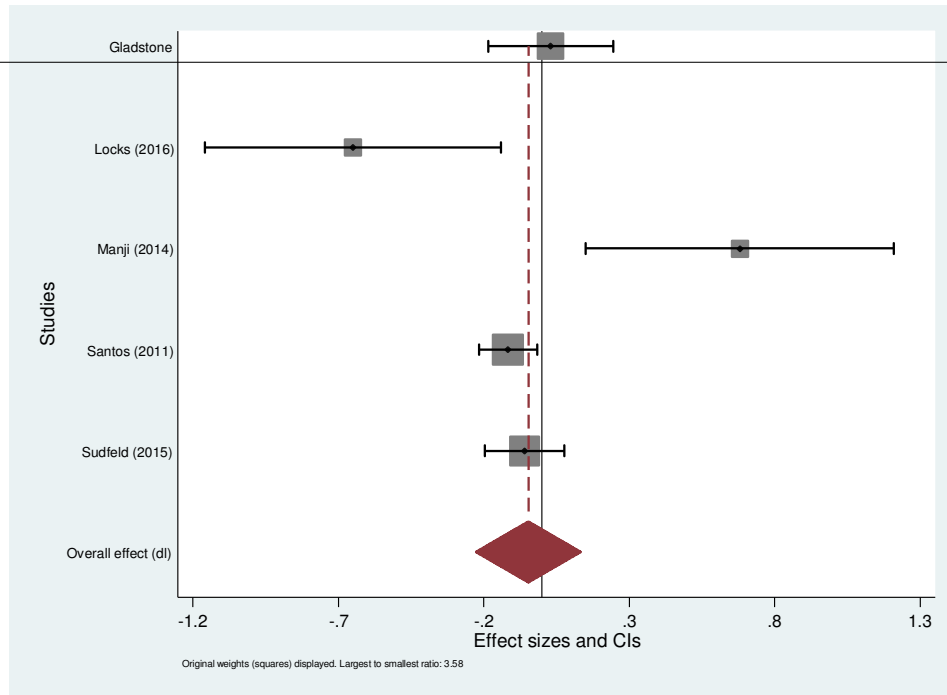

**Figure 36: Association between late preterm birth, 34-37 weeks (reference: term) and language development.**

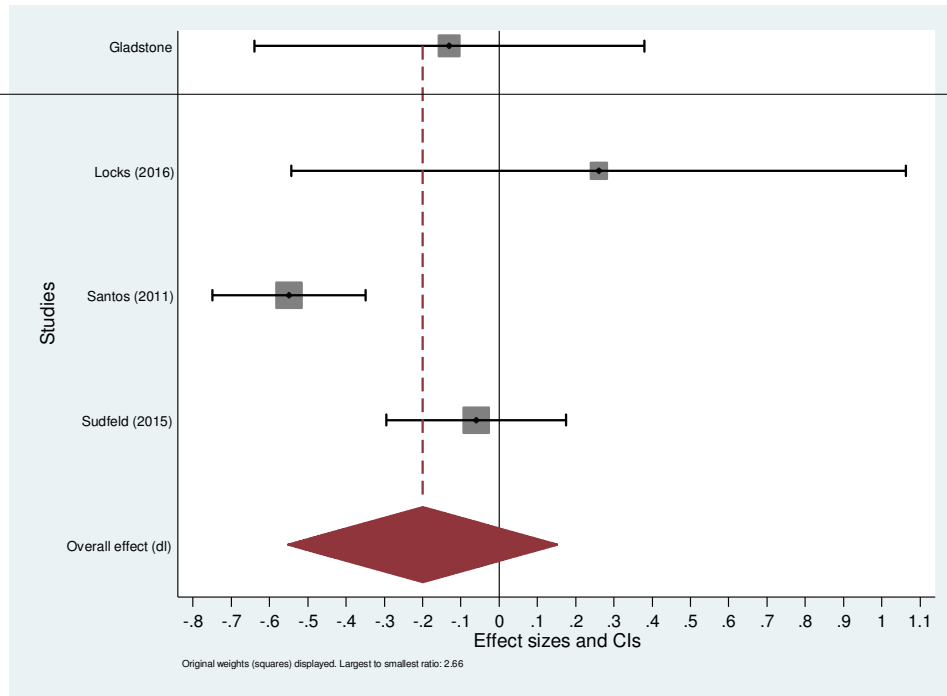

**Figure 37: Association between early preterm birth, < 34 weeks (reference: term) and language development.**

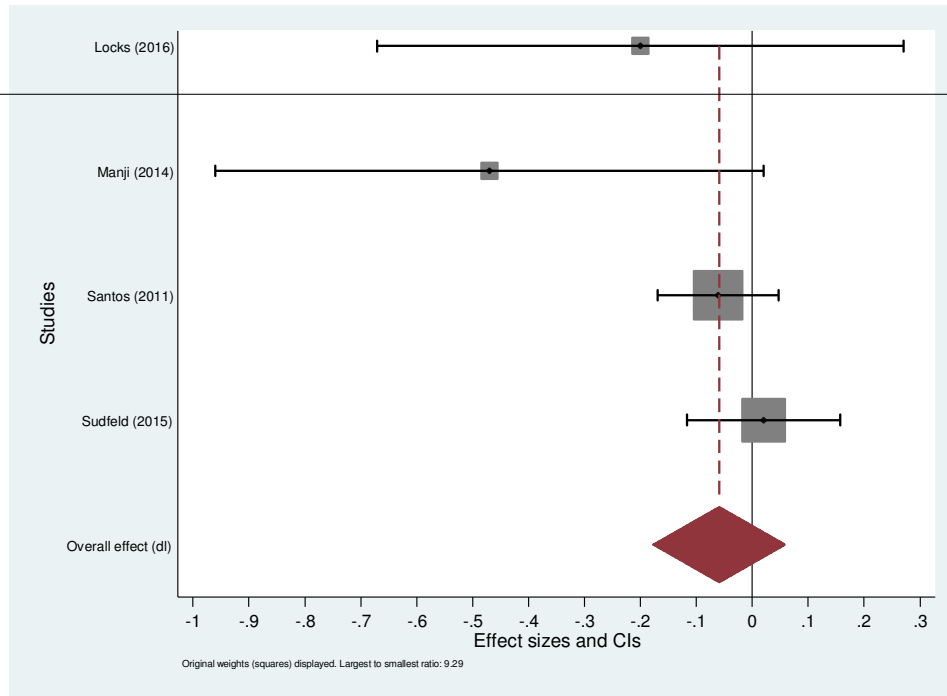

**Figure 38: Association between moderate SGA (reference: AGA) and language development.**

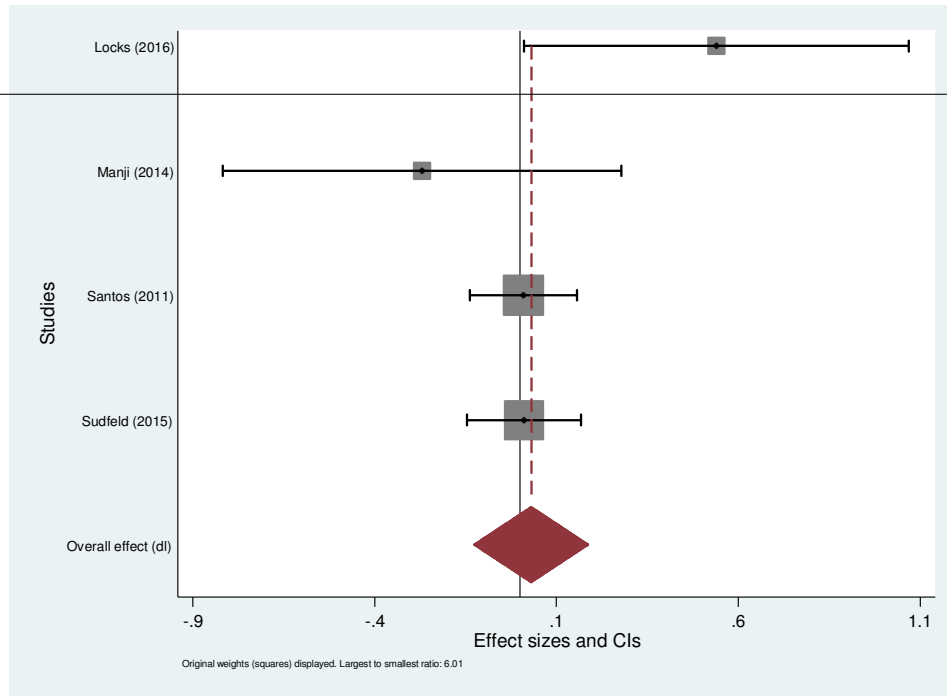

**Figure 39: Association between severe SGA (reference: AGA) and language development.**

#### 4. Parental Risk Factors on Child's Cognitive Development

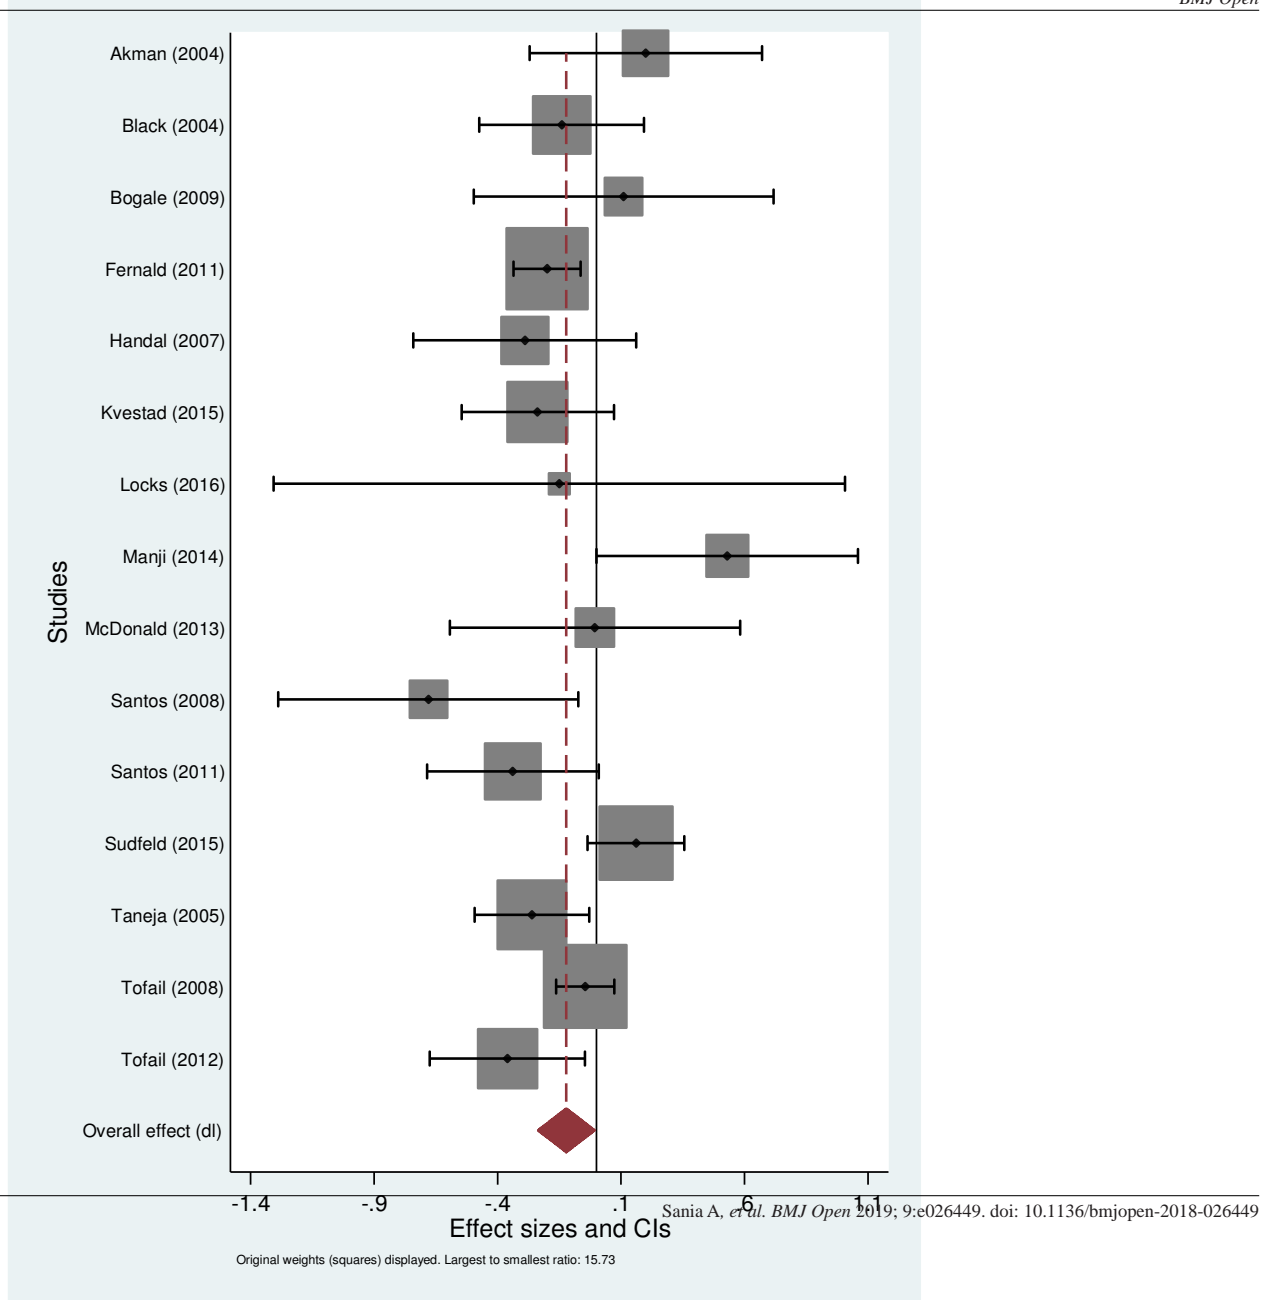

Figure 40: Association between no maternal education (reference: primary education) and cognitive development.

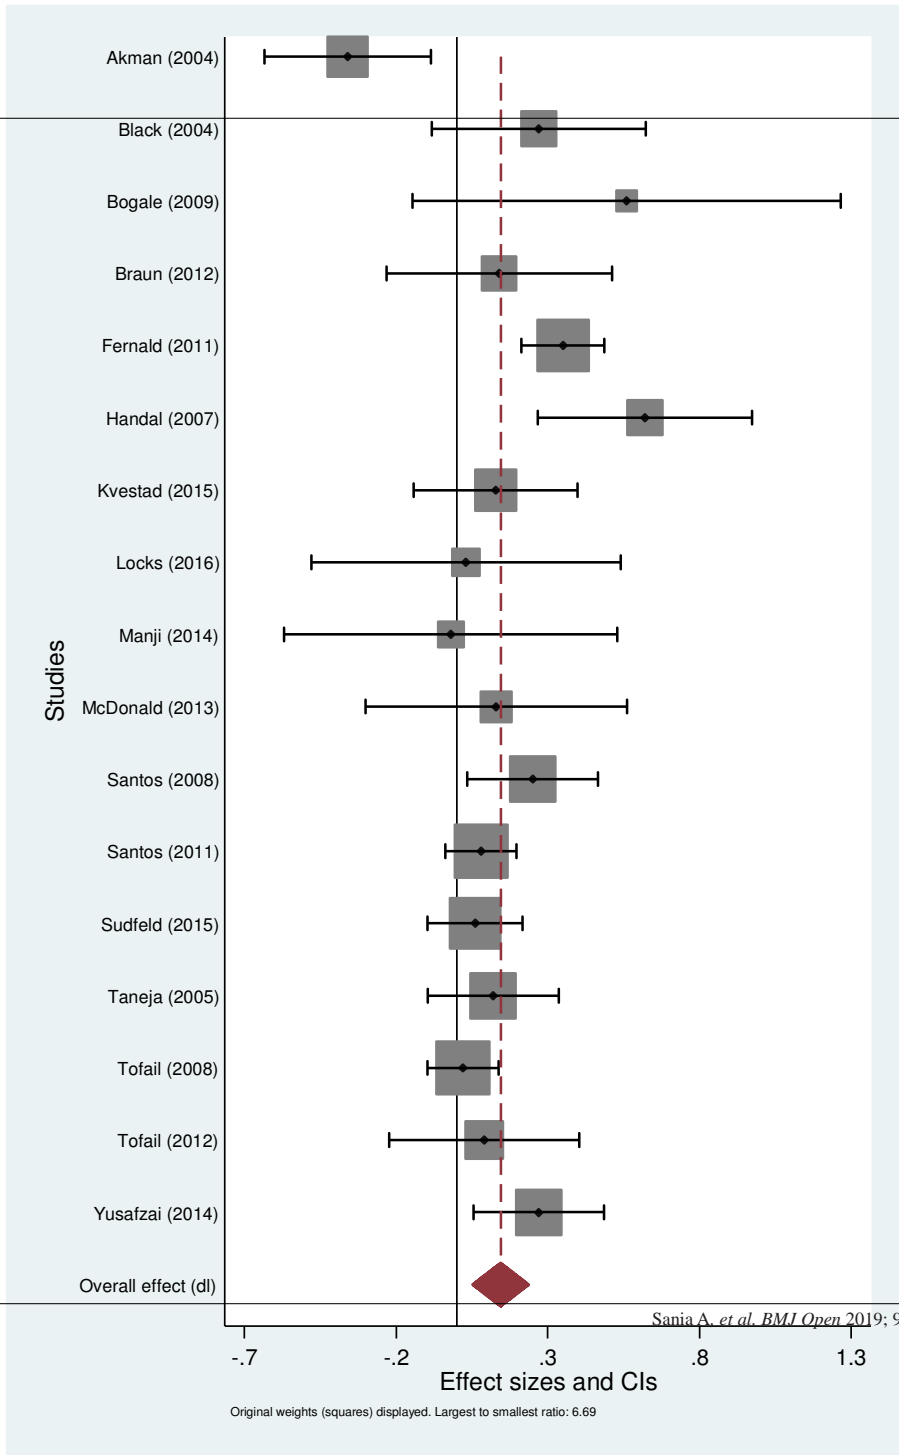

Figure 41: Association between maternal secondary education (reference: primary education) and cognitive development.

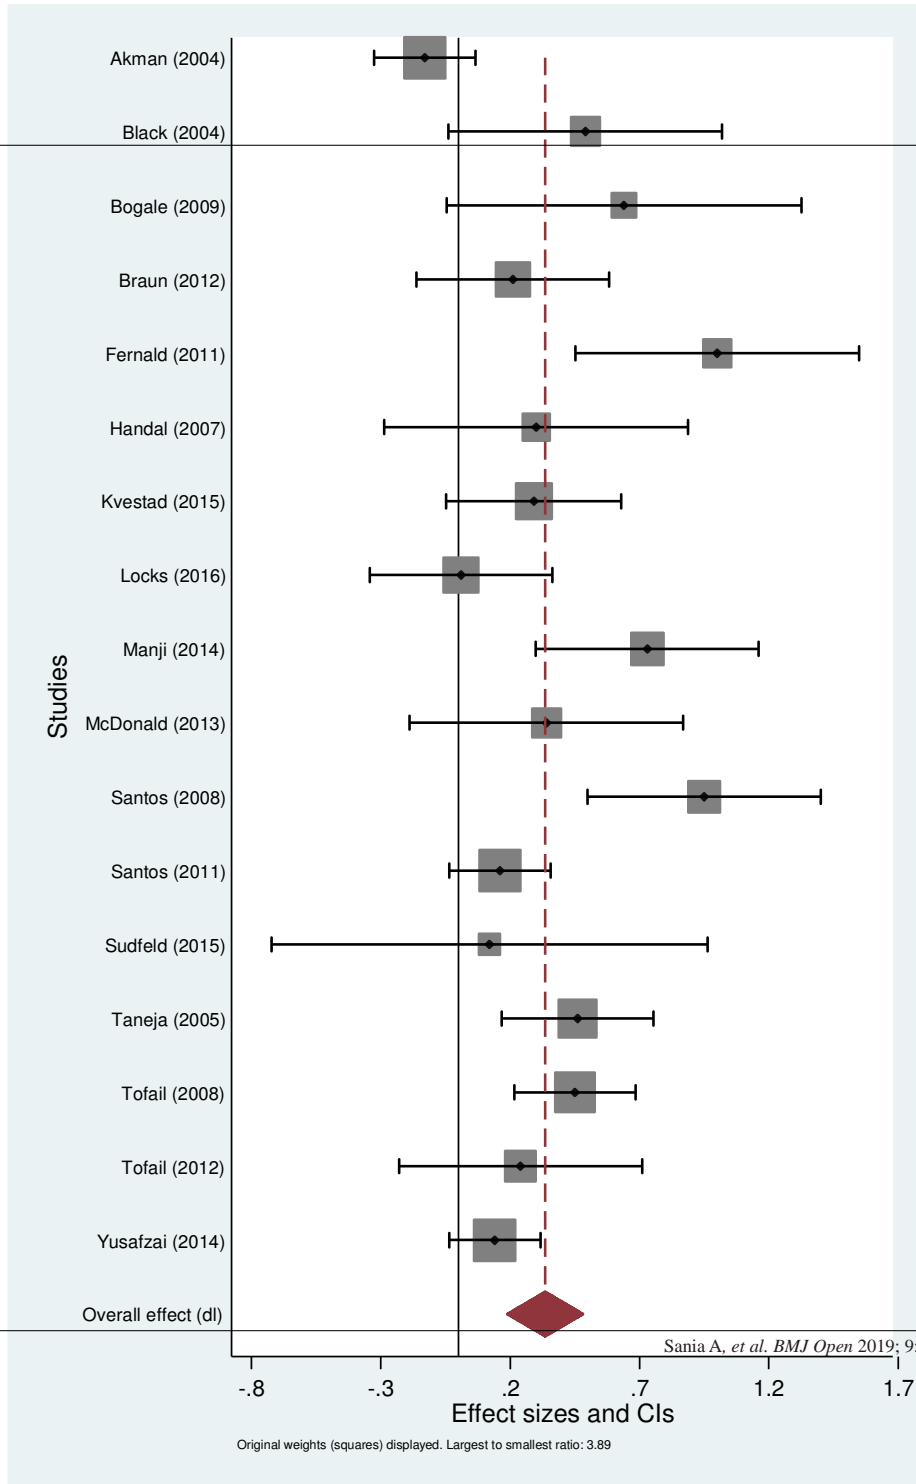

Sania A, et al. *BMJ Open* 2019; 9:e026449. doi: 10.1136/bmjopen-2018-026449

Figure 42: Association between maternal higher education (reference: primary education) and cognitive development.



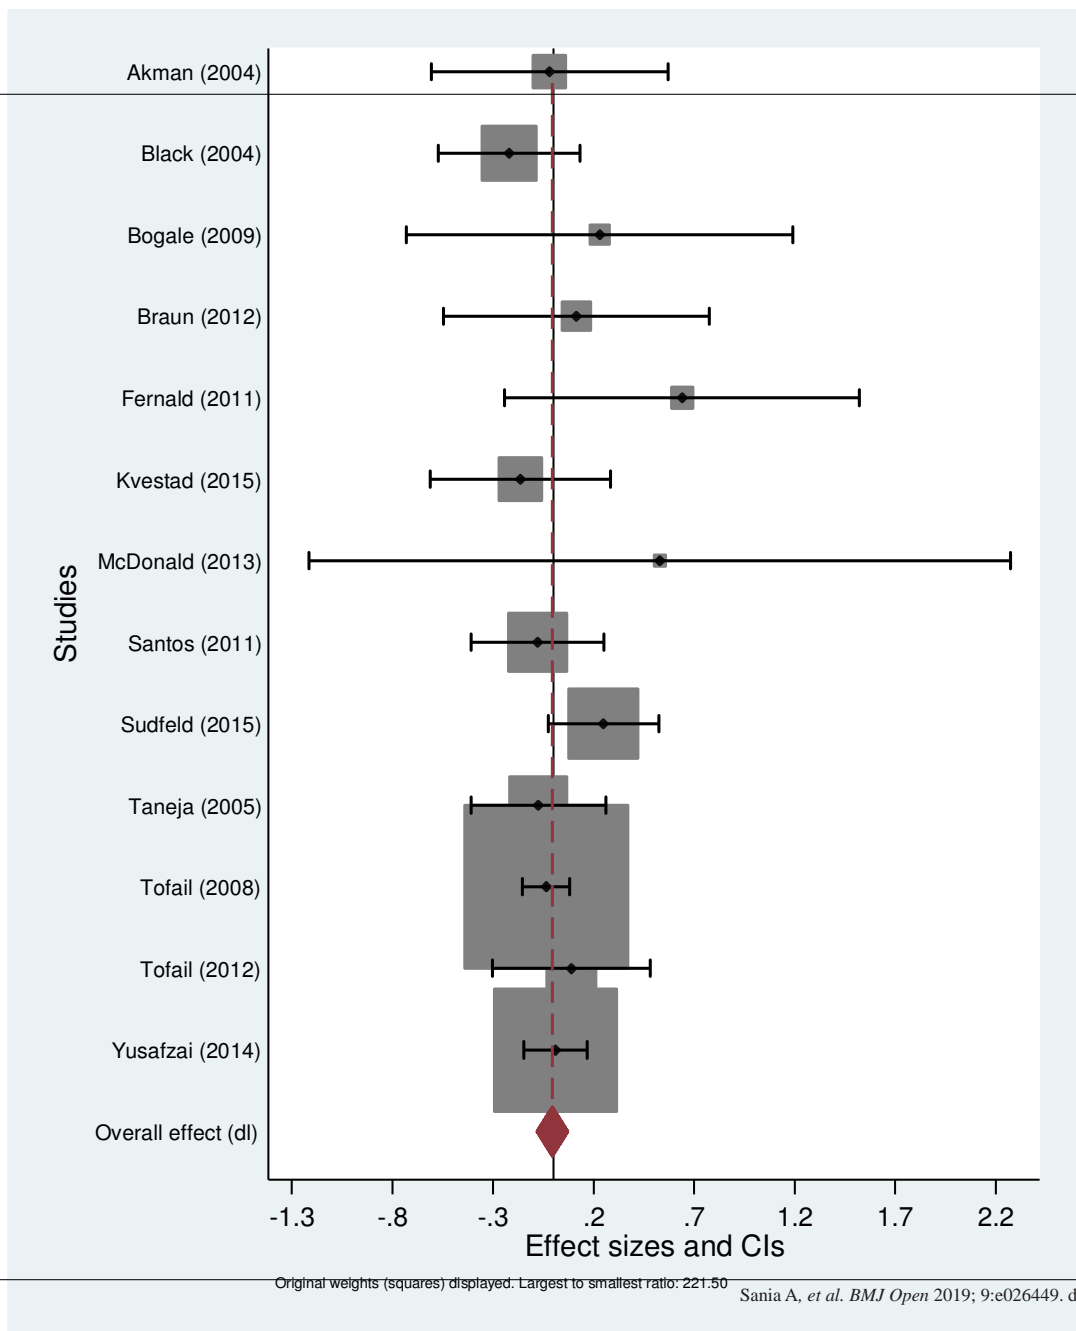

Figure 43: Association between no paternal education (reference: primary education) and cognitive development.

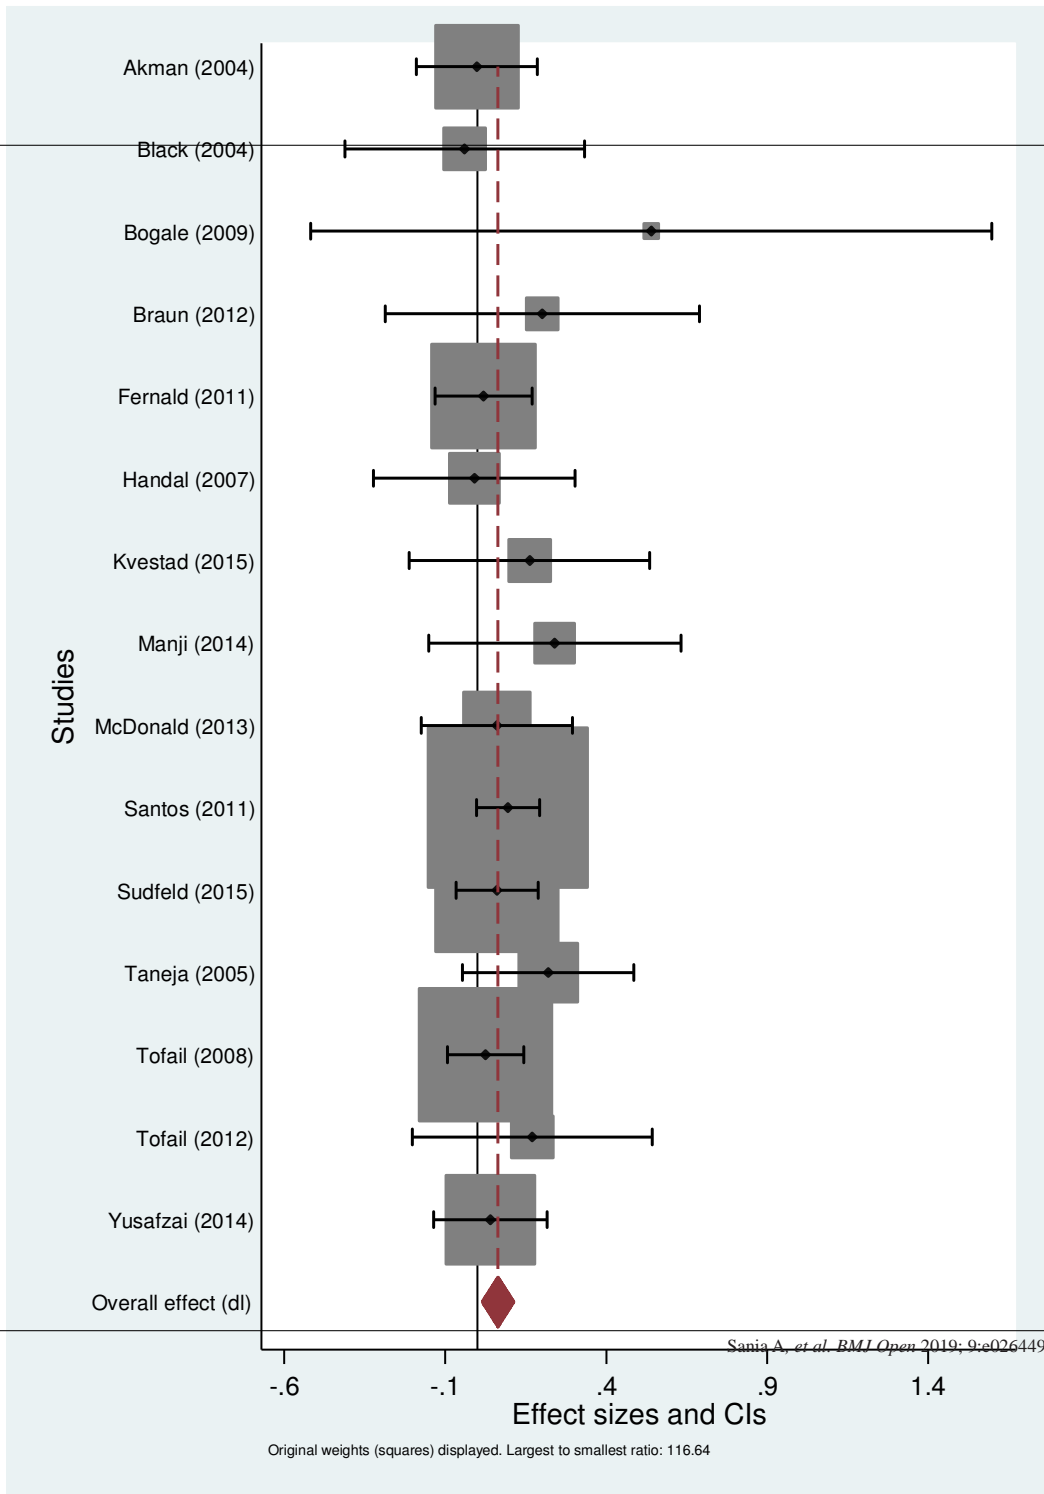

Sanja A, et al. *BMJ Open* 2019; 9:e026449. doi: 10.1136/bmjopen-2018-026449

Figure 44: Association between paternal secondary education (reference: primary education) and cognitive development.

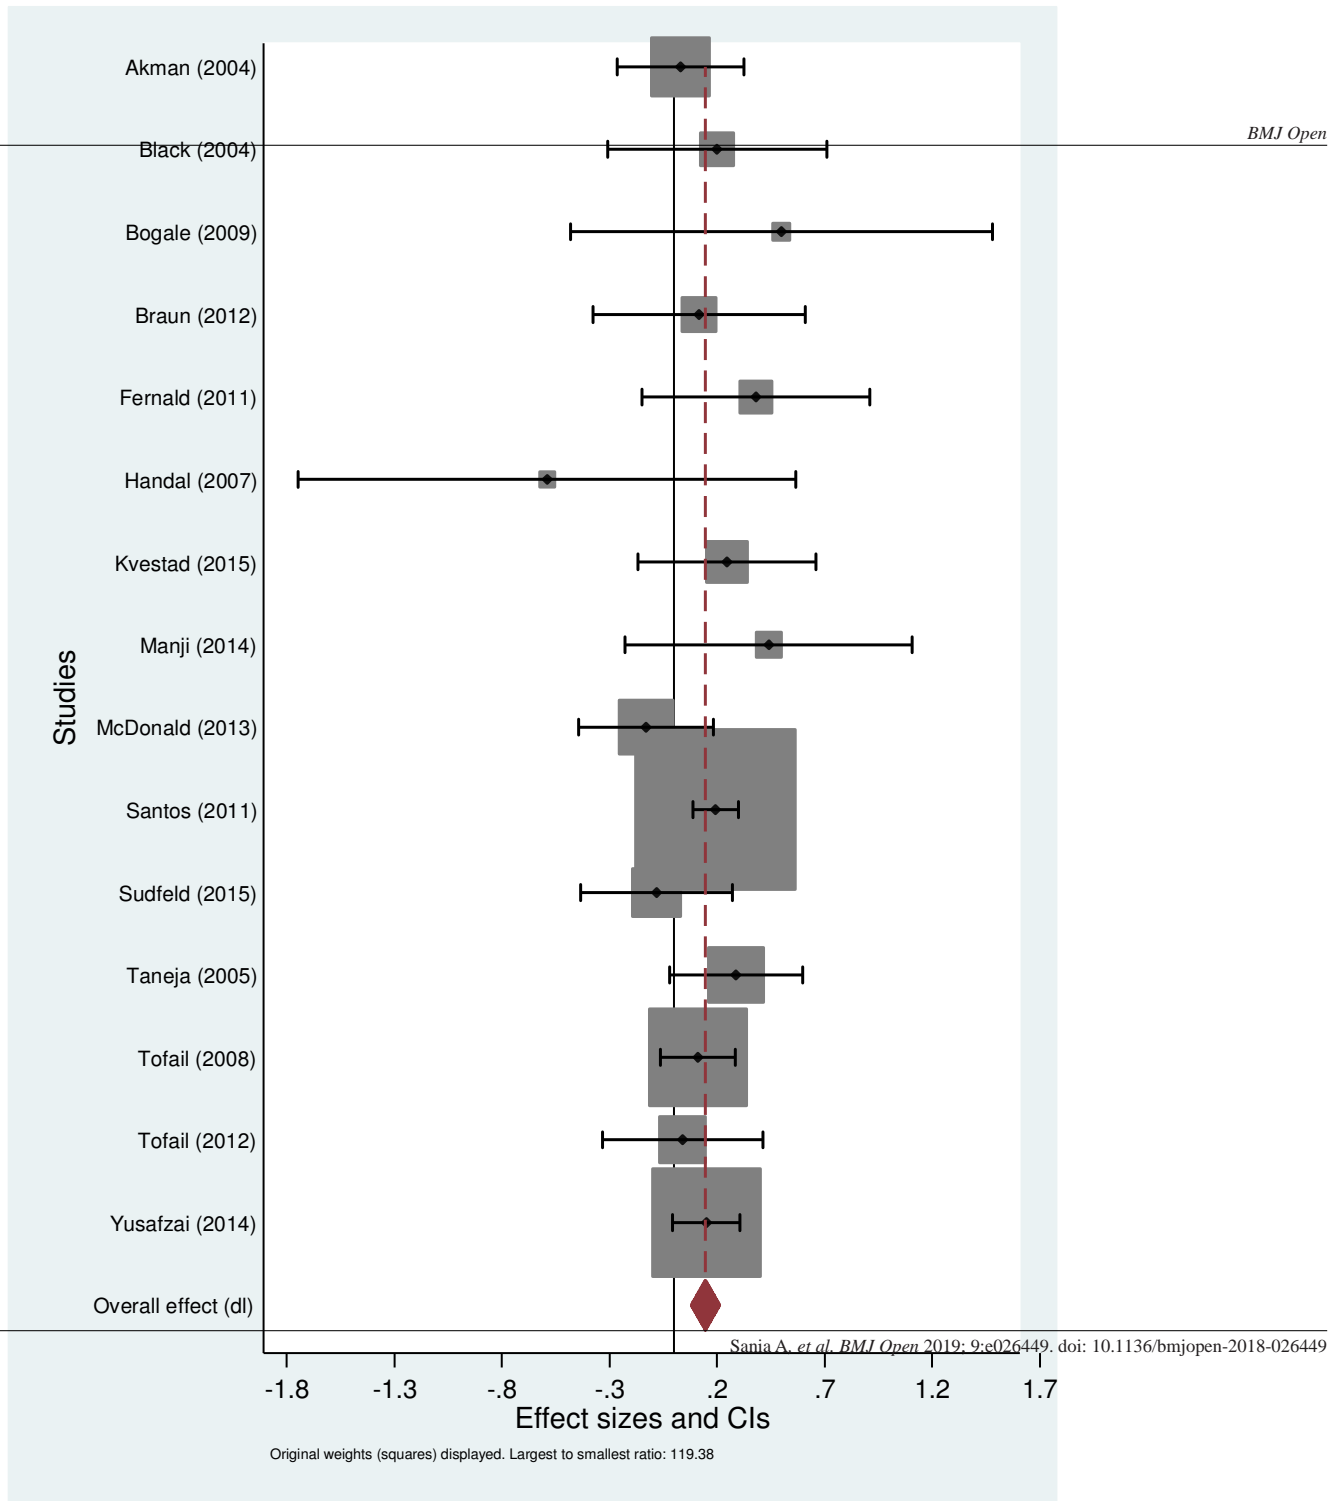

Figure 45: Association between paternal higher education (reference: primary education) and cognitive development.

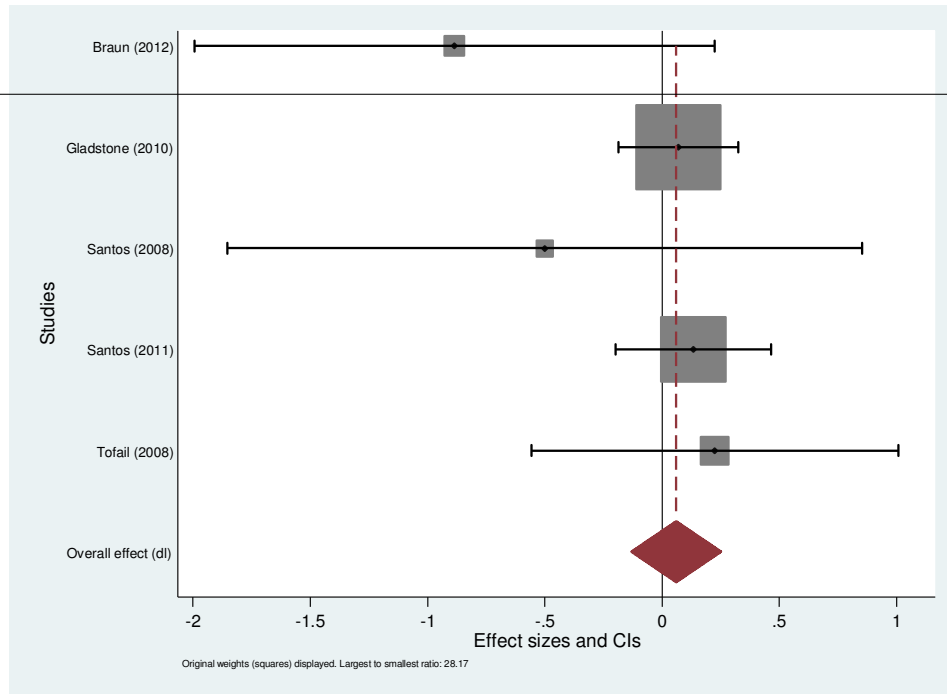

**Figure 46: Association between maternal ages < 15 (reference: ages 20-34) and cognitive development.**

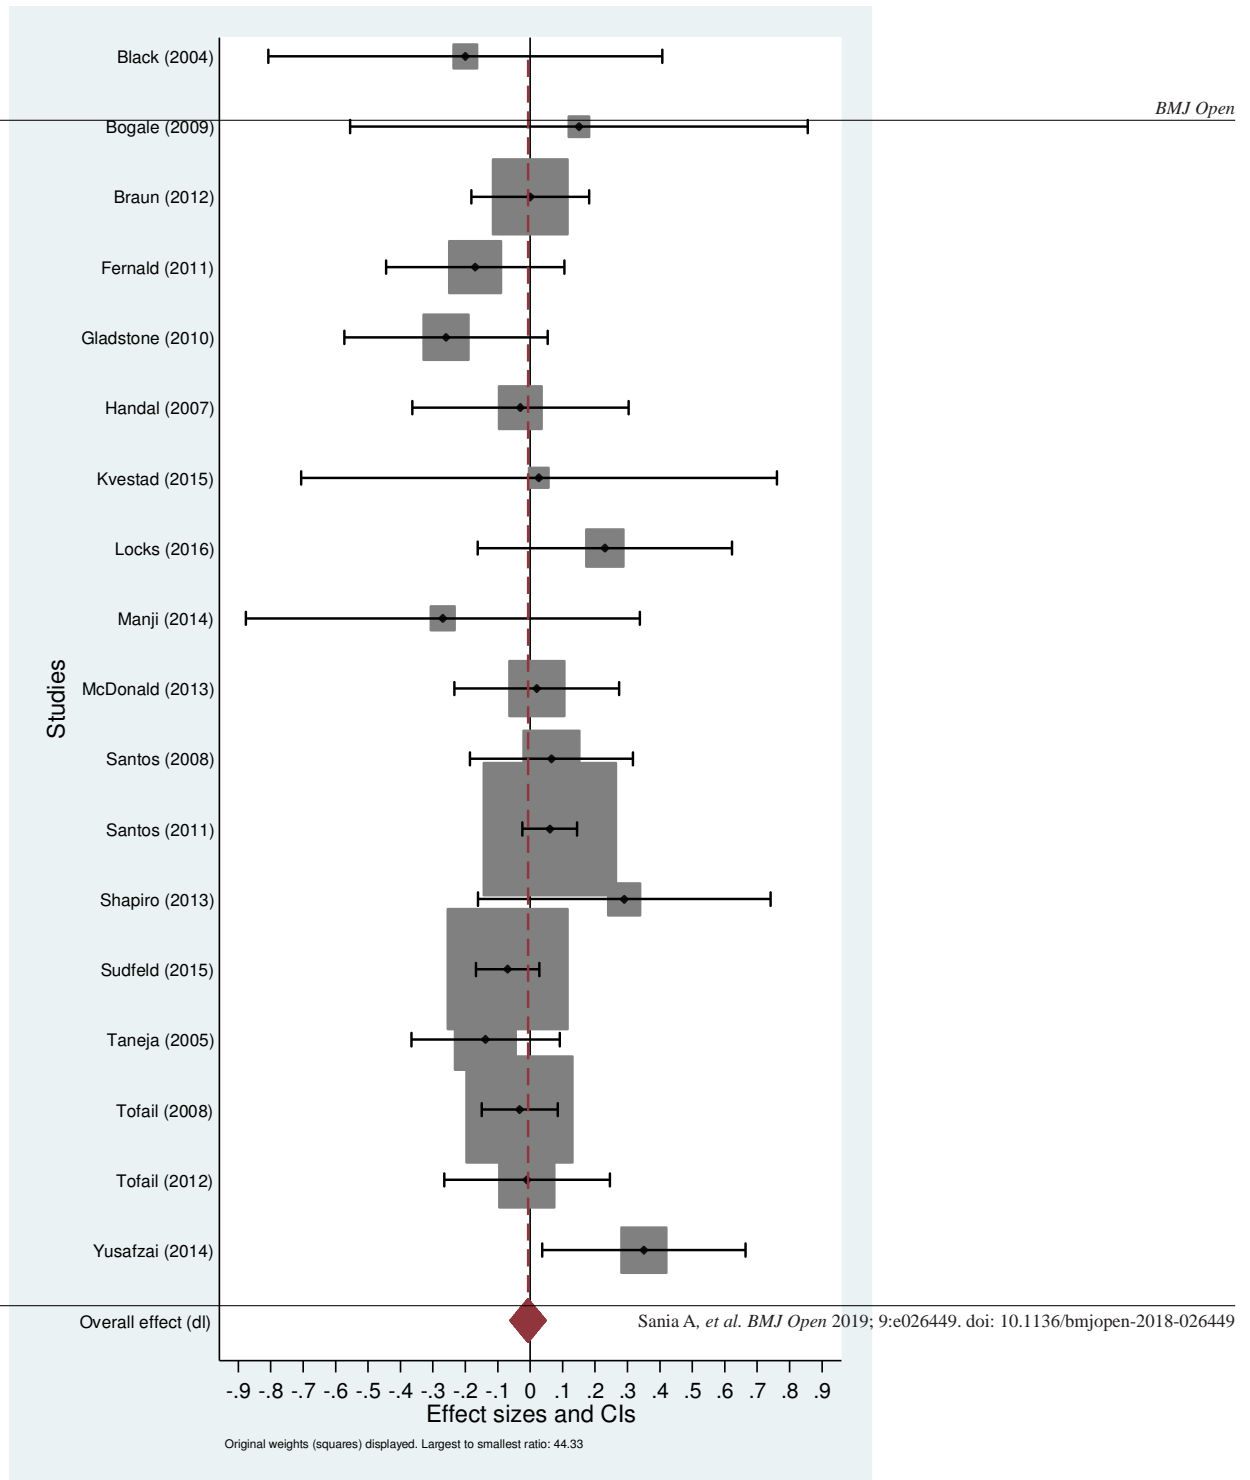

Figure 47: Association between maternal ages 15-20 (reference: ages 20-34) and cognitive development.

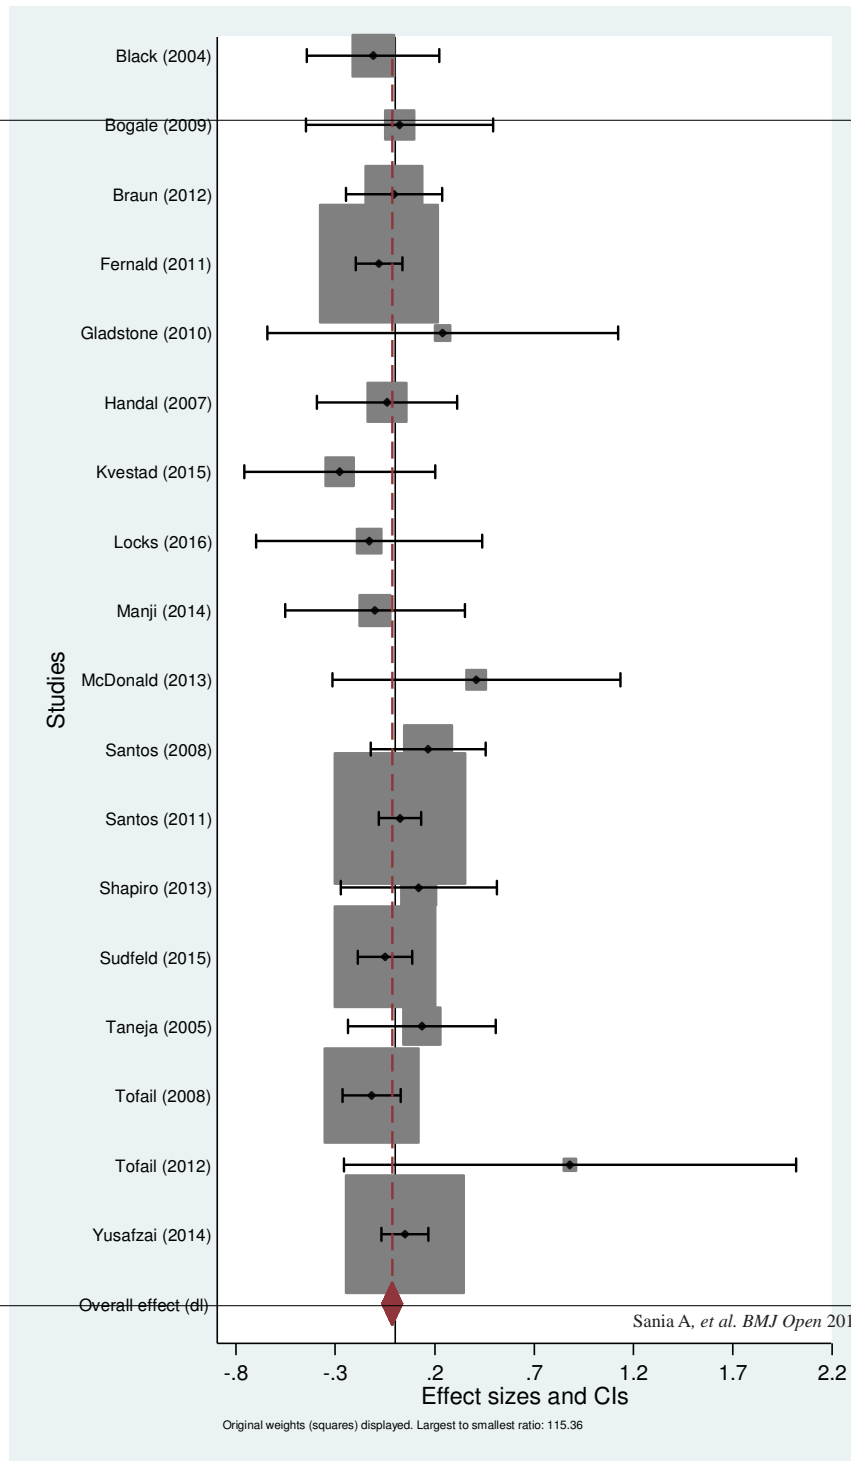

Figure 48: Association between maternal ages >35 (reference: ages 20-34) and cognitive development.

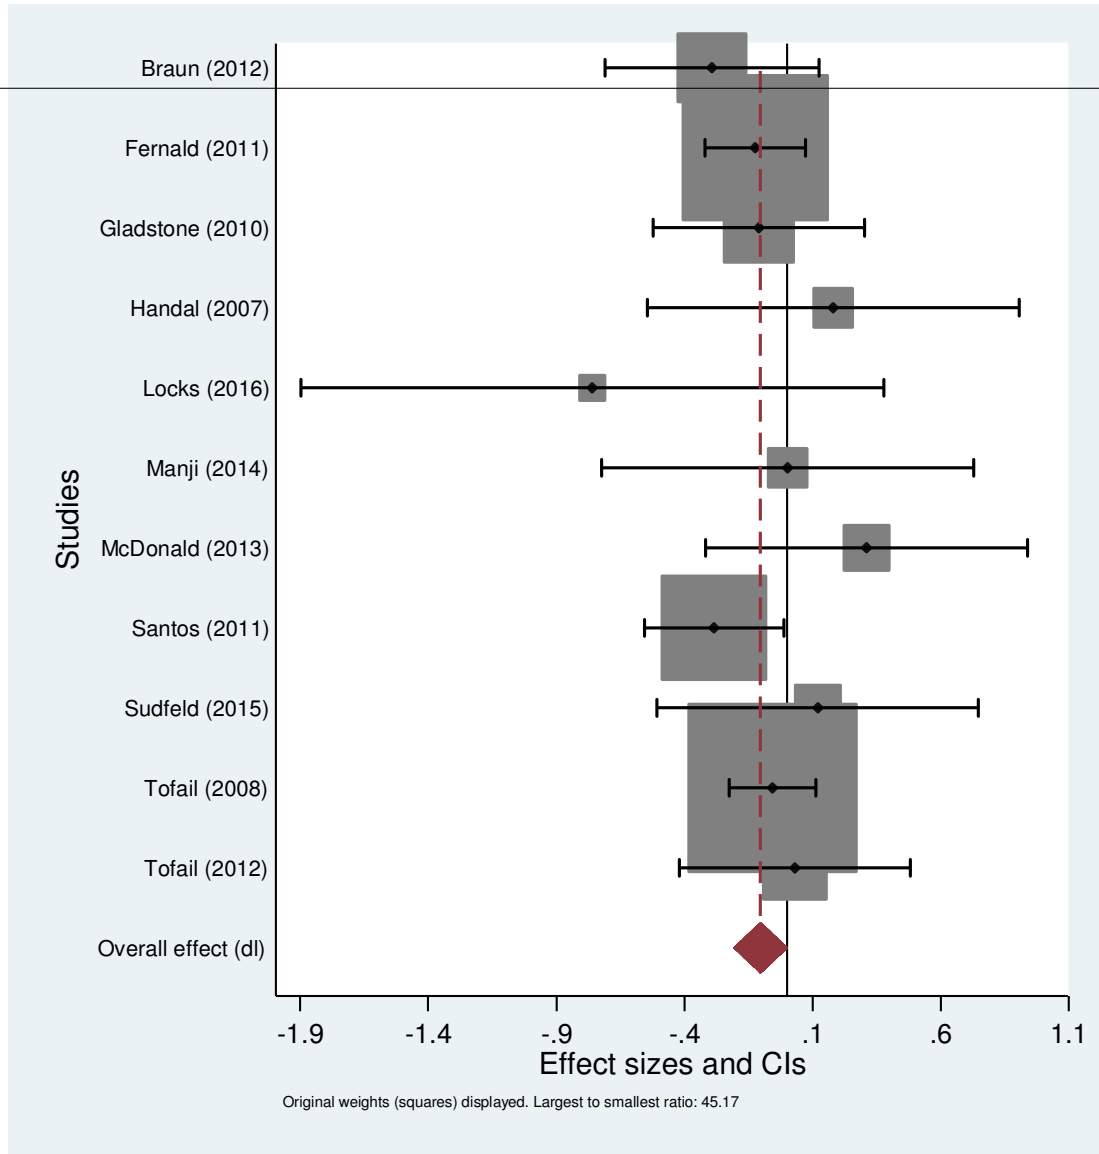

**Figure 49: Association between maternal height < 145cm (reference: >155 cm) and cognitive development.**

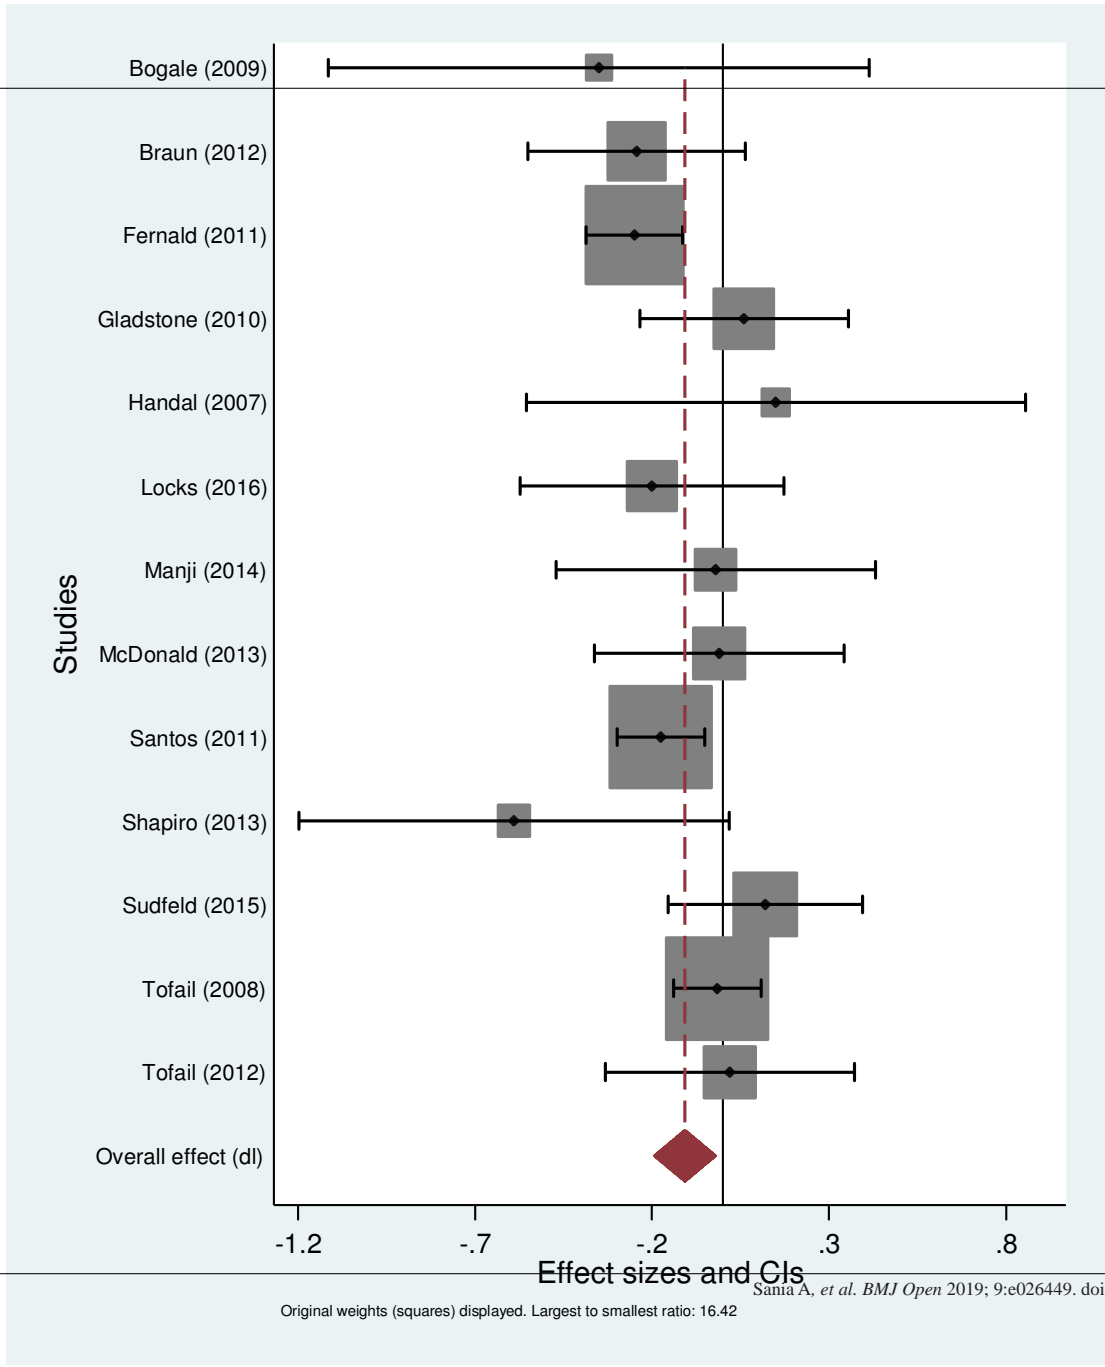

Figure 50: Association between maternal height 145-150cm (reference: >155 cm) and cognitive development.



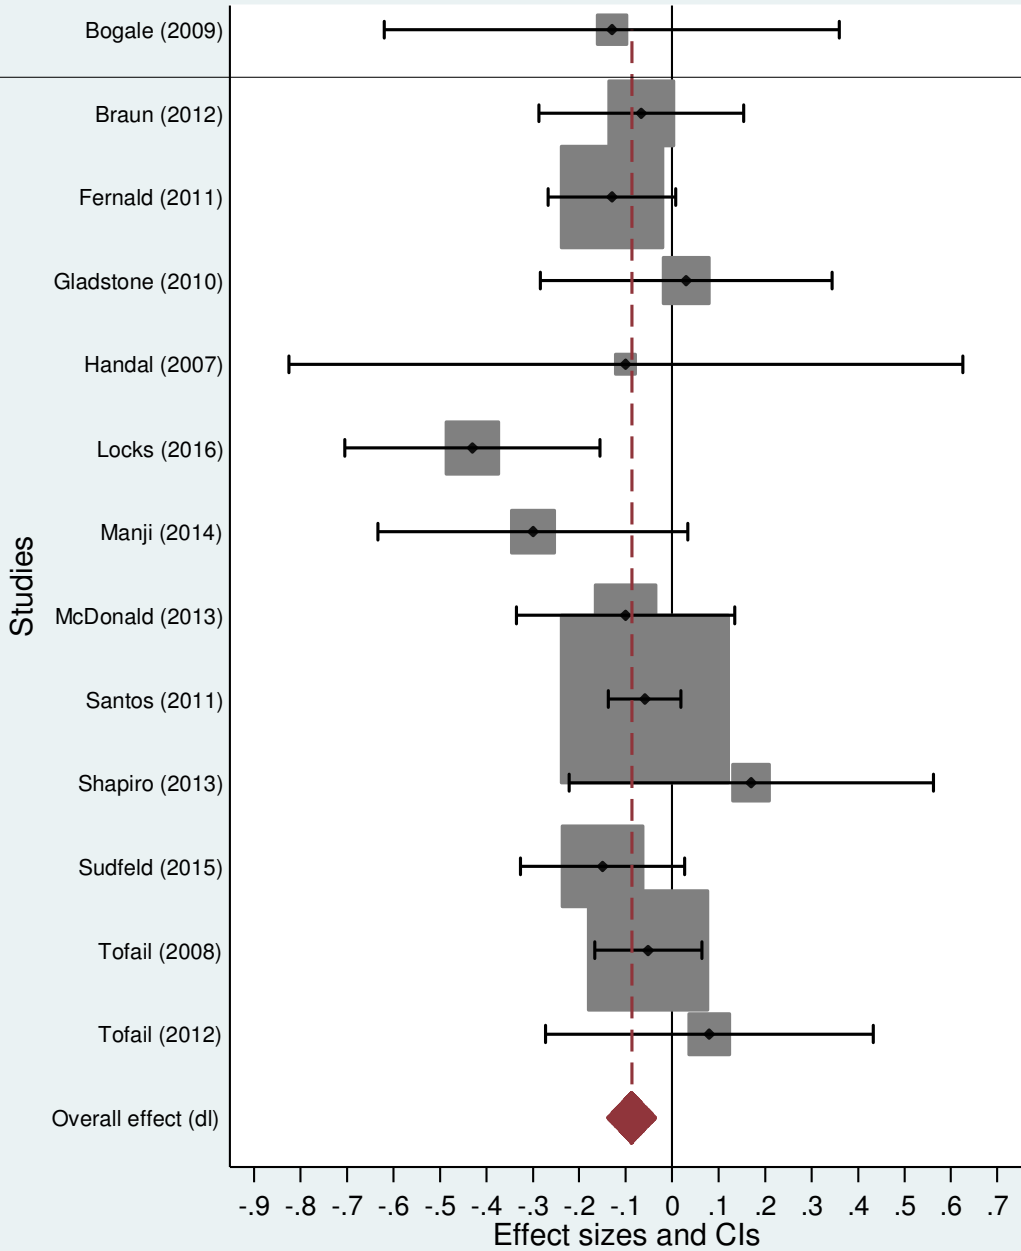

Original weights (squares) displayed. Largest to smallest ratio: 71.09 Sania A, et al. *BMJ Open* 2019; 9:e026449. doi: 10.1136/bmjopen-2018-026449

Figure 51: Association between maternal height 150-155 cm (reference: >155 cm) and cognitive development.

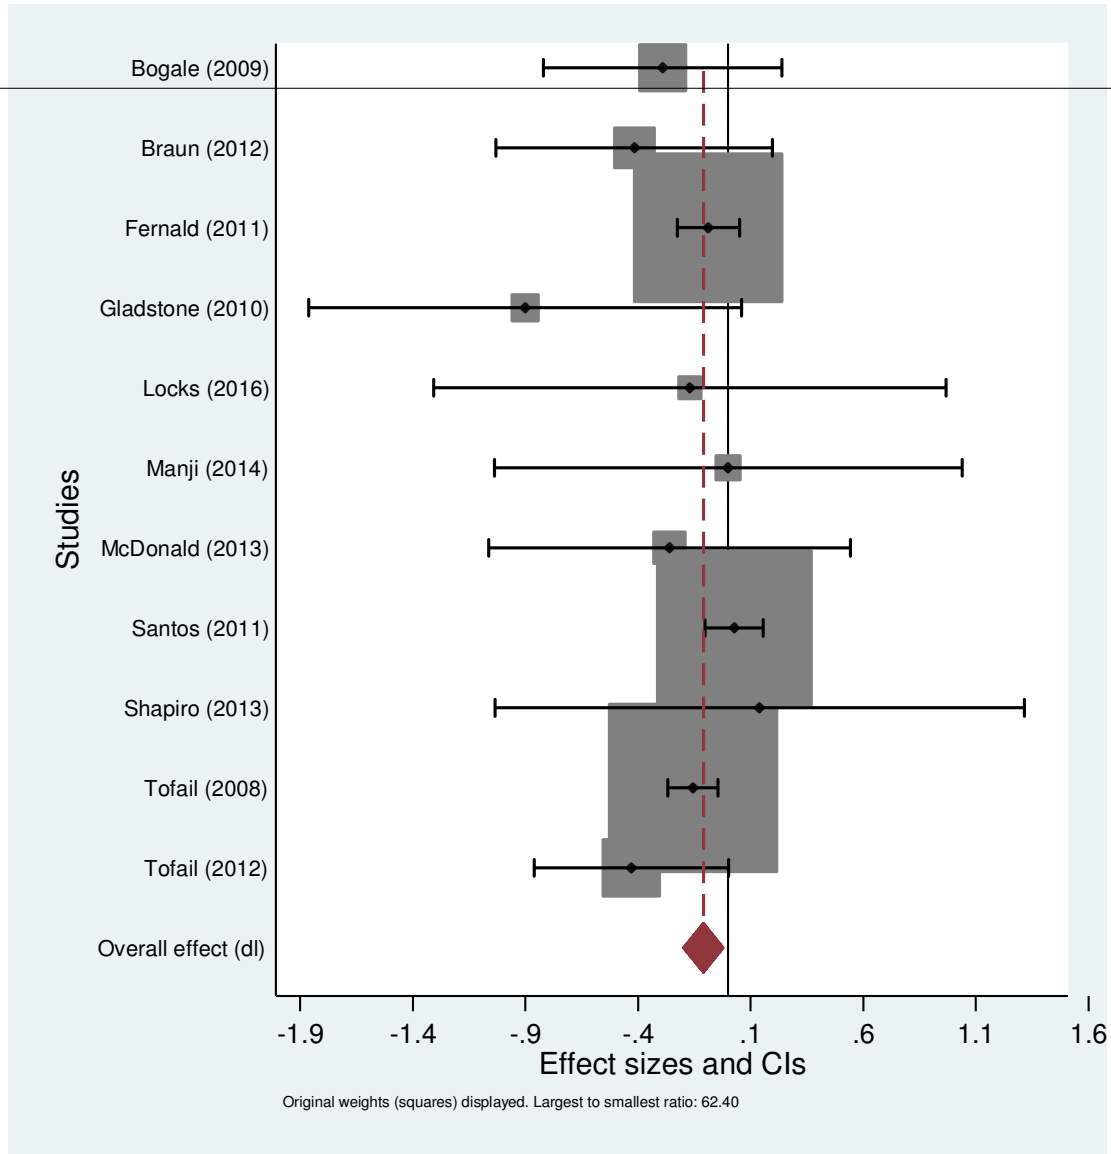

**Figure 52: Association between maternal BMI <18.5 kg/m<sup>2</sup> (reference: 18.5-25) and cognitive development.**

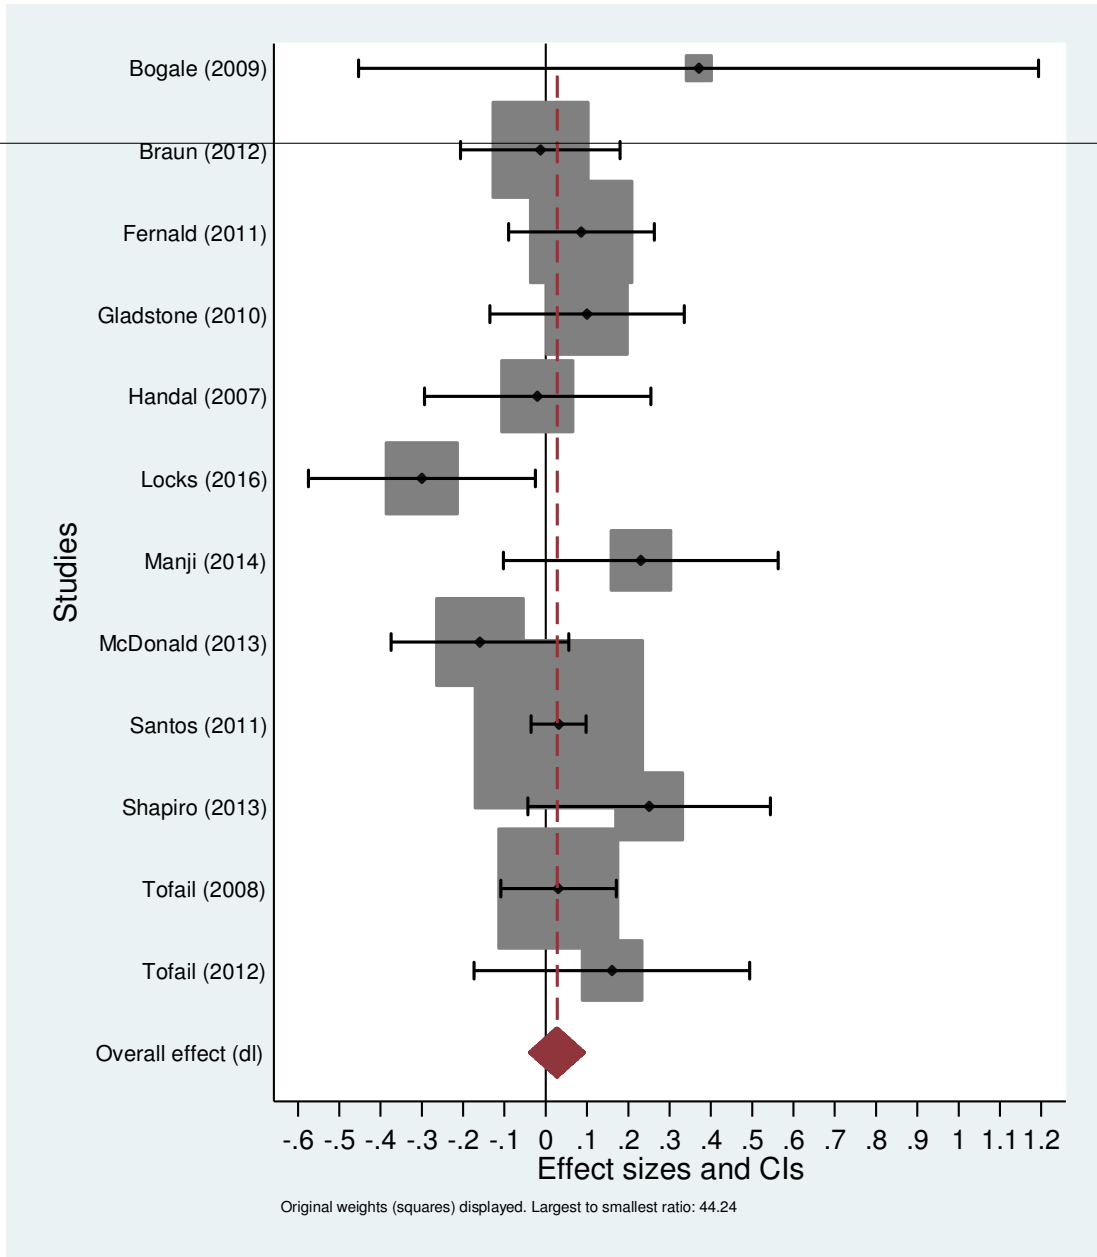

**Figure 53: Association between maternal BMI 25-30 kg/m<sup>2</sup> (reference: 18.5-25) and cognitive development.**

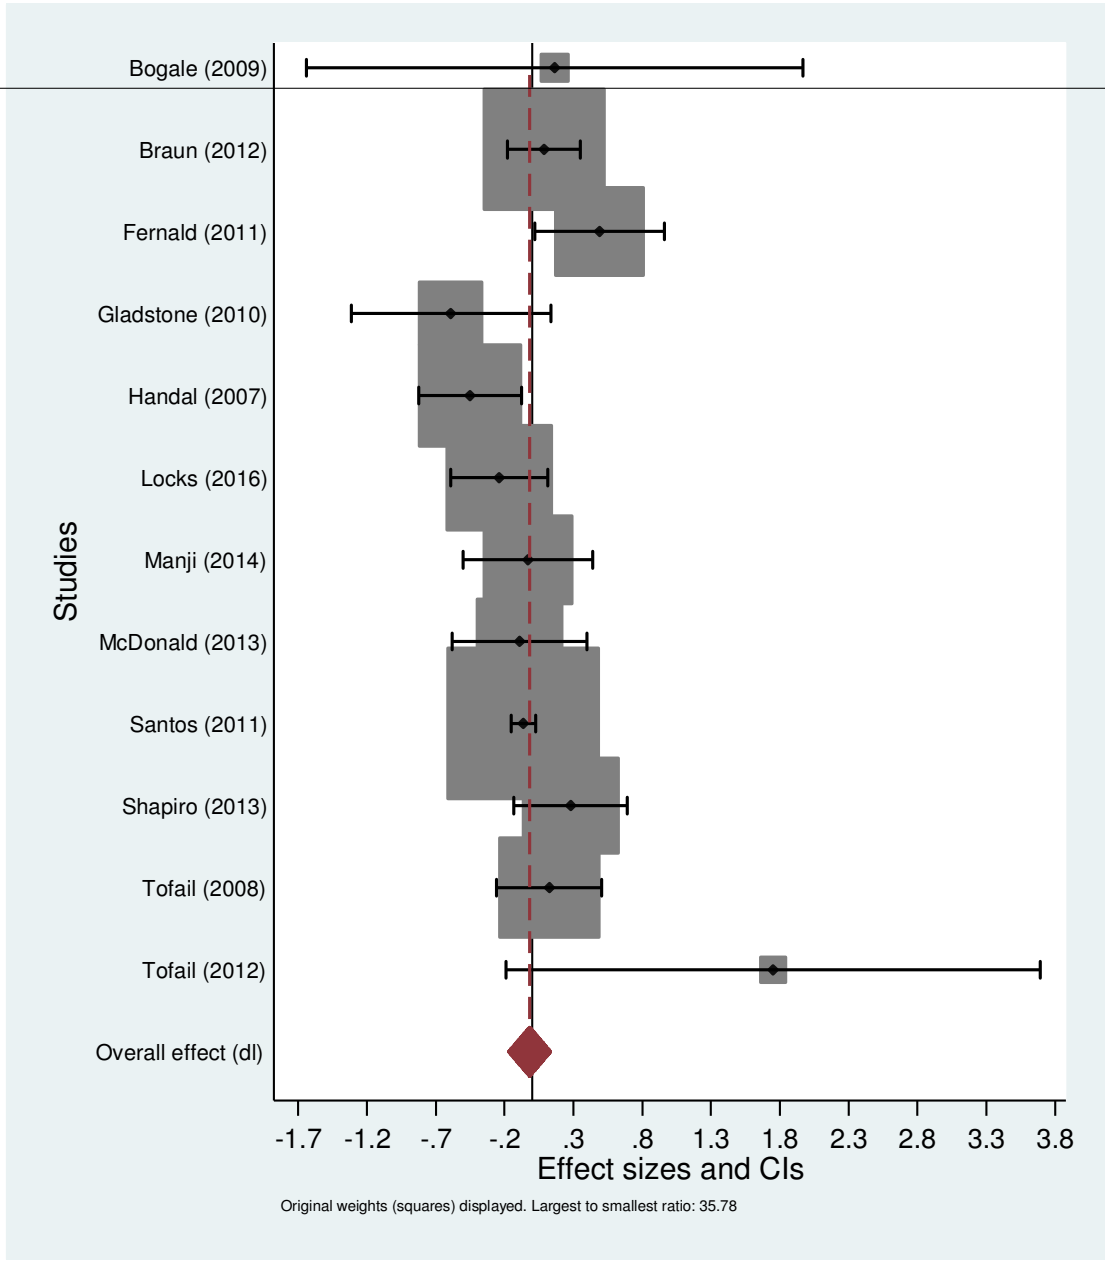

Figure 54: Association between maternal BMI >30 kg/m<sup>2</sup> (reference: 18.5-25) and cognitive development. doi: 10.1136/bmjopen-2018-026449

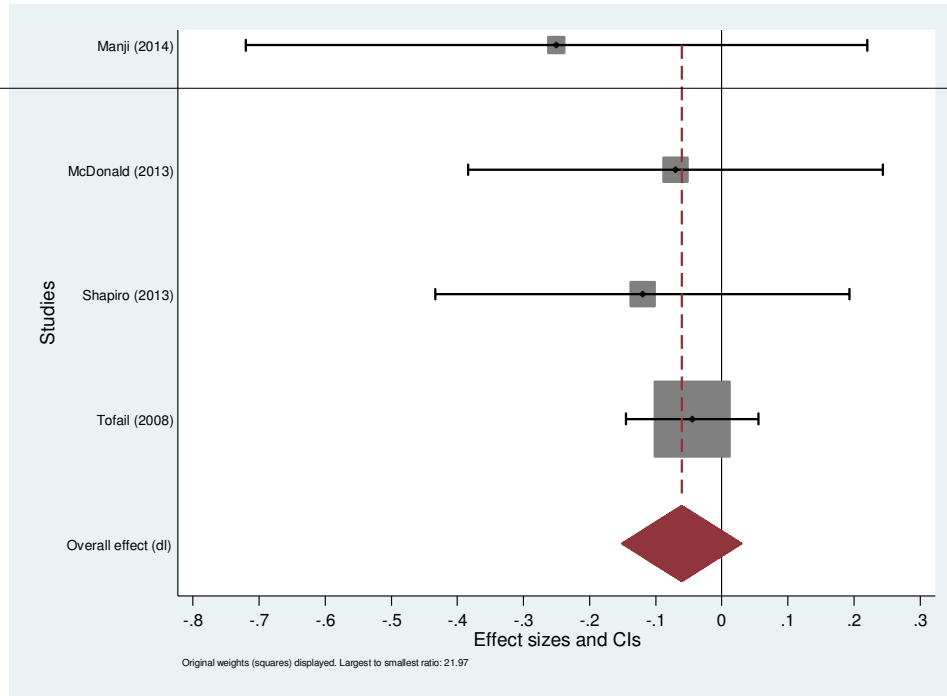

**Figure 55: Association between mild anemia in pregnancy (reference: no anemia) and cognitive development.**

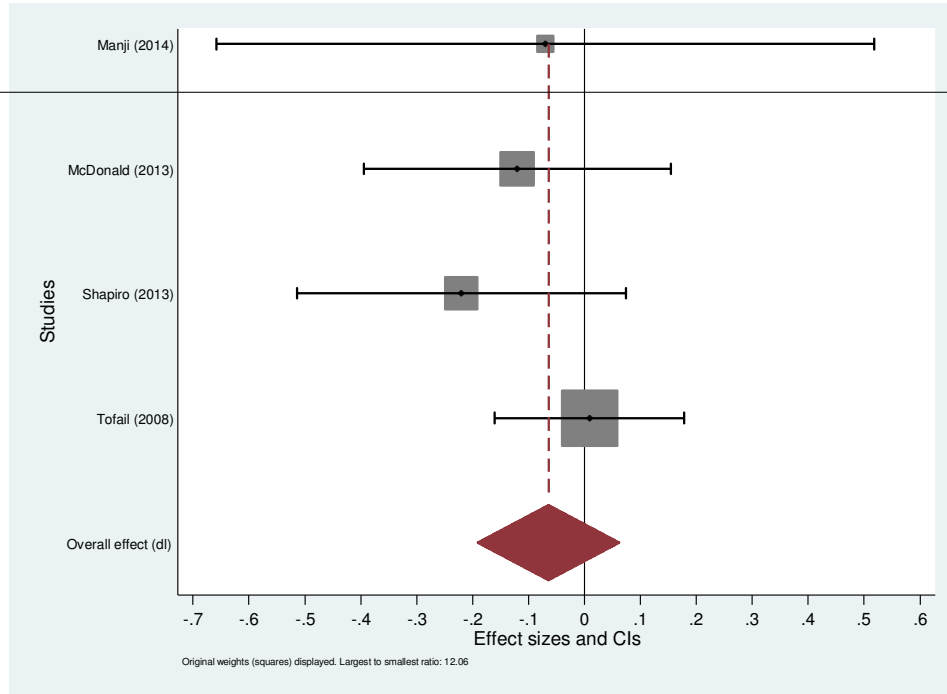

**Figure 56: Association between maternal moderate anemia (reference: no anemia) and cognitive development.**

## 5. Parental Risk Factors on Child's Motor Development

Supplementary material

BMJ Open

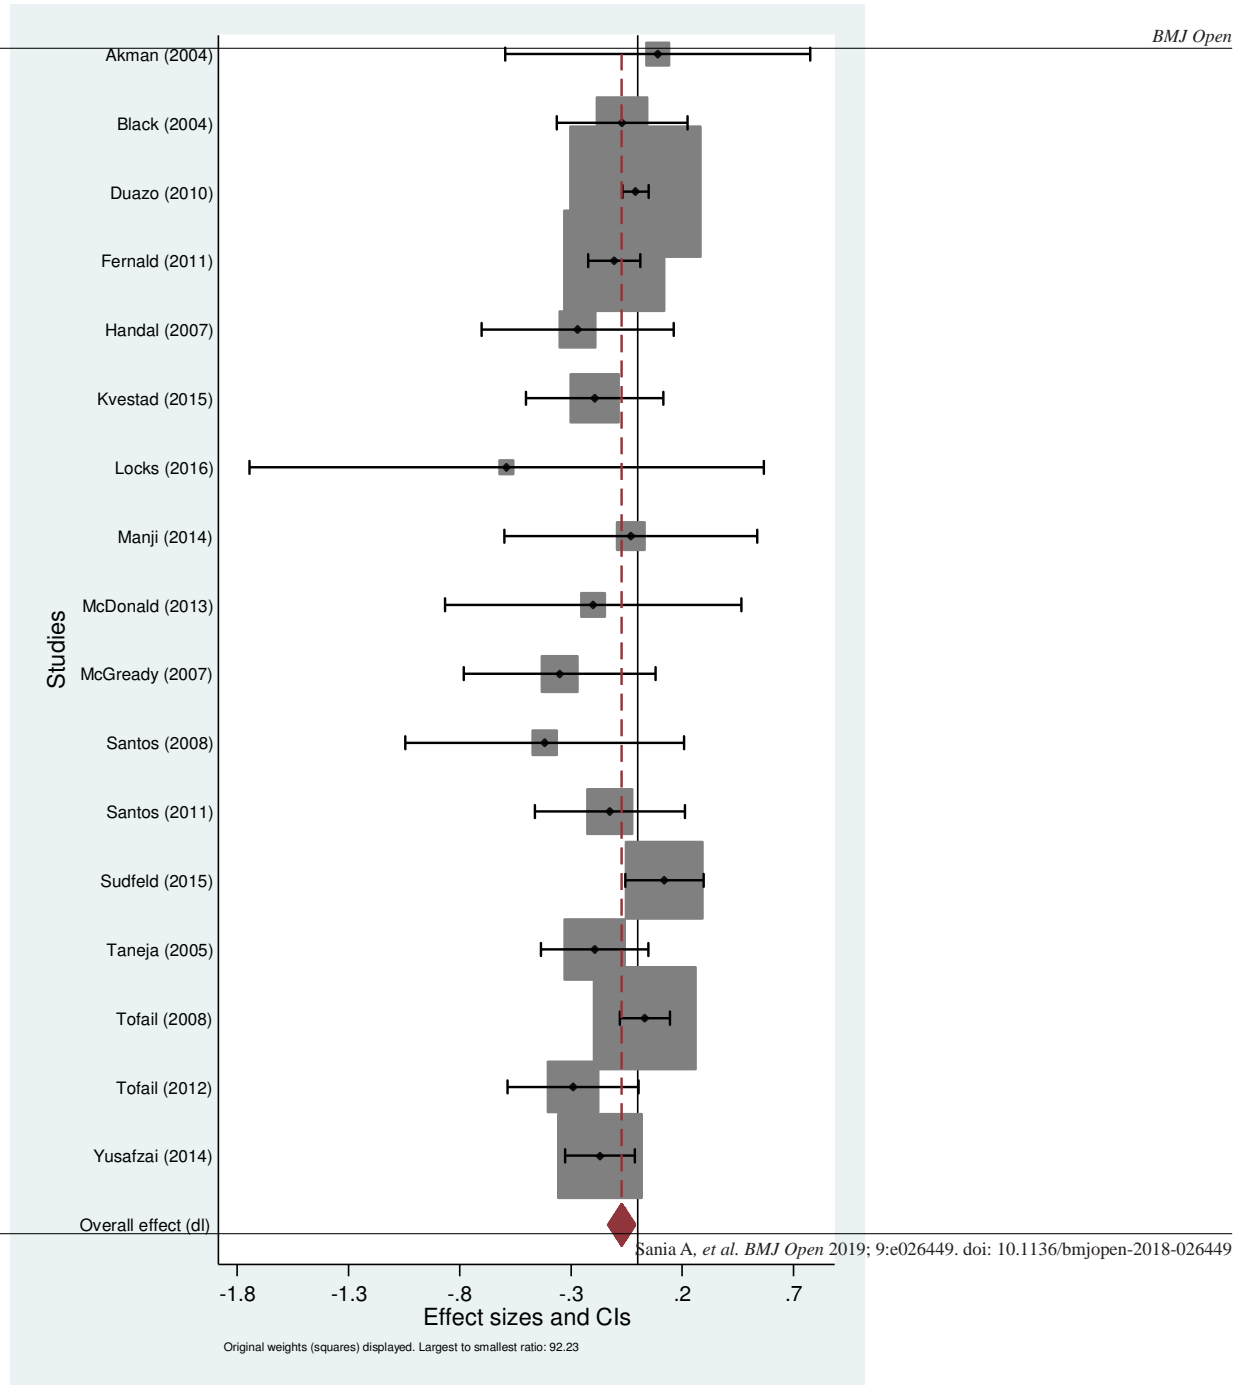

Figure 57: Association between no maternal education (reference: primary education) and motor development.

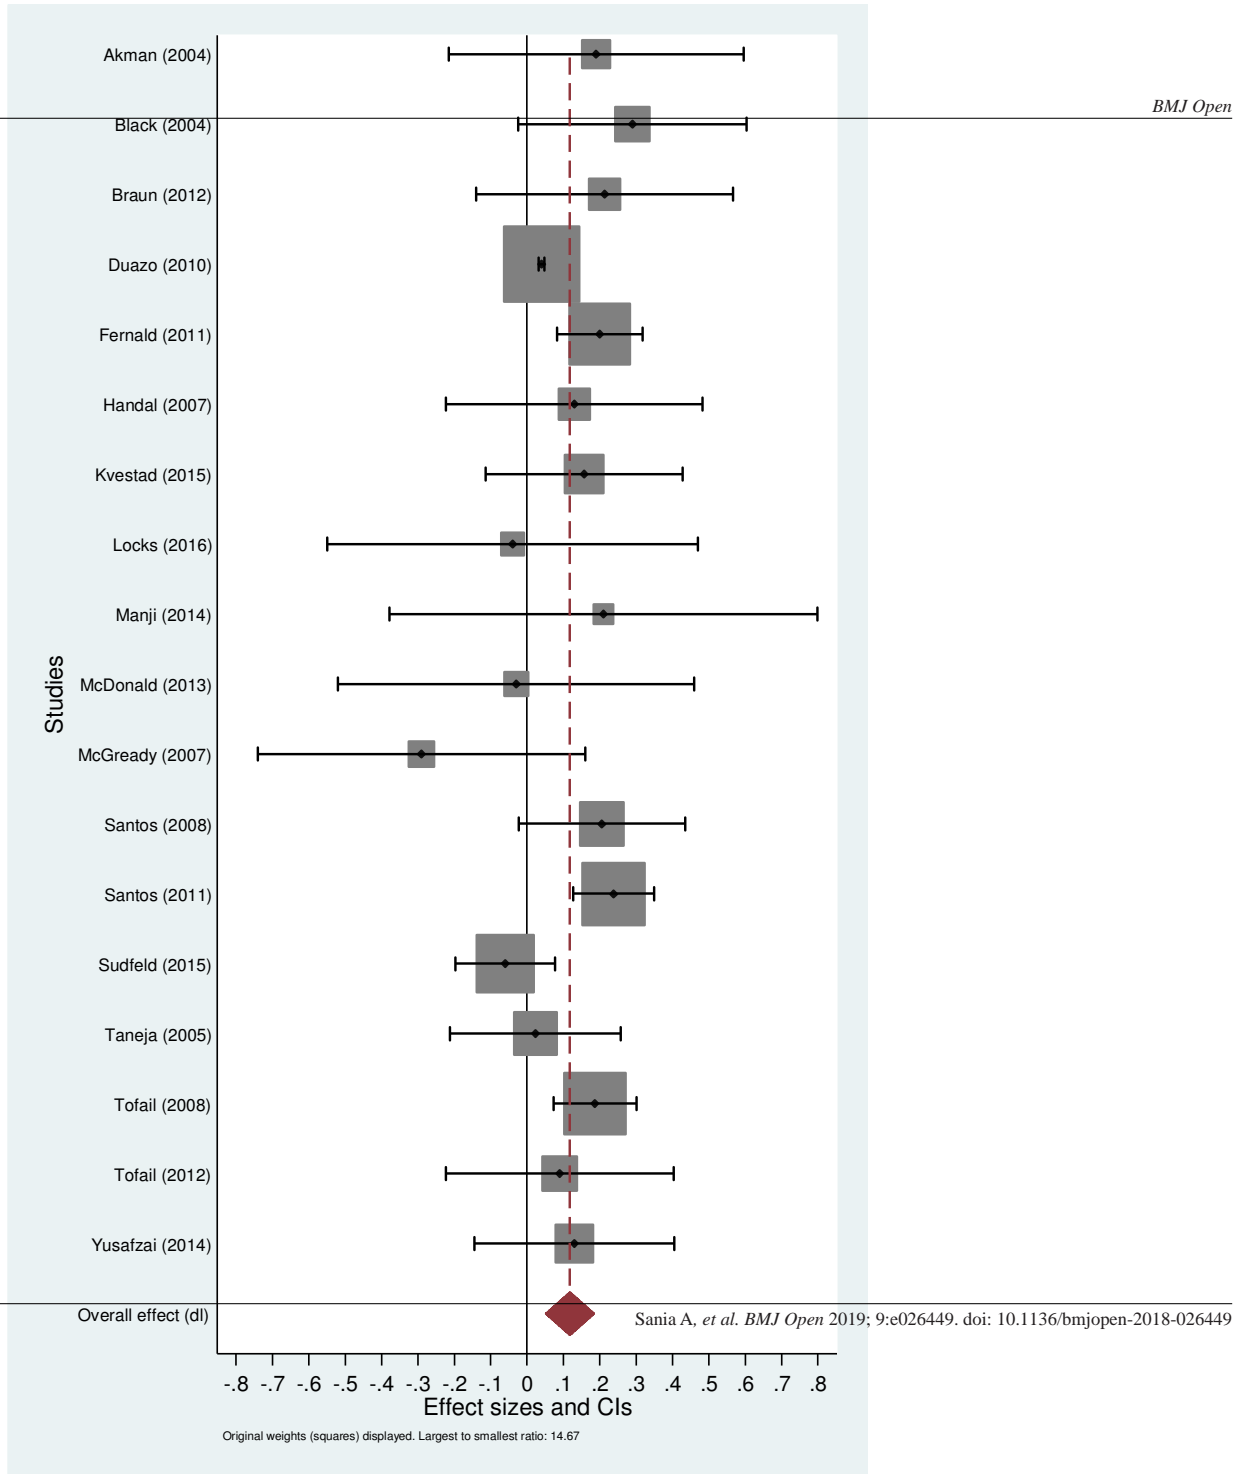

Figure 58: Association between maternal secondary education (reference: primary education) and motor development.



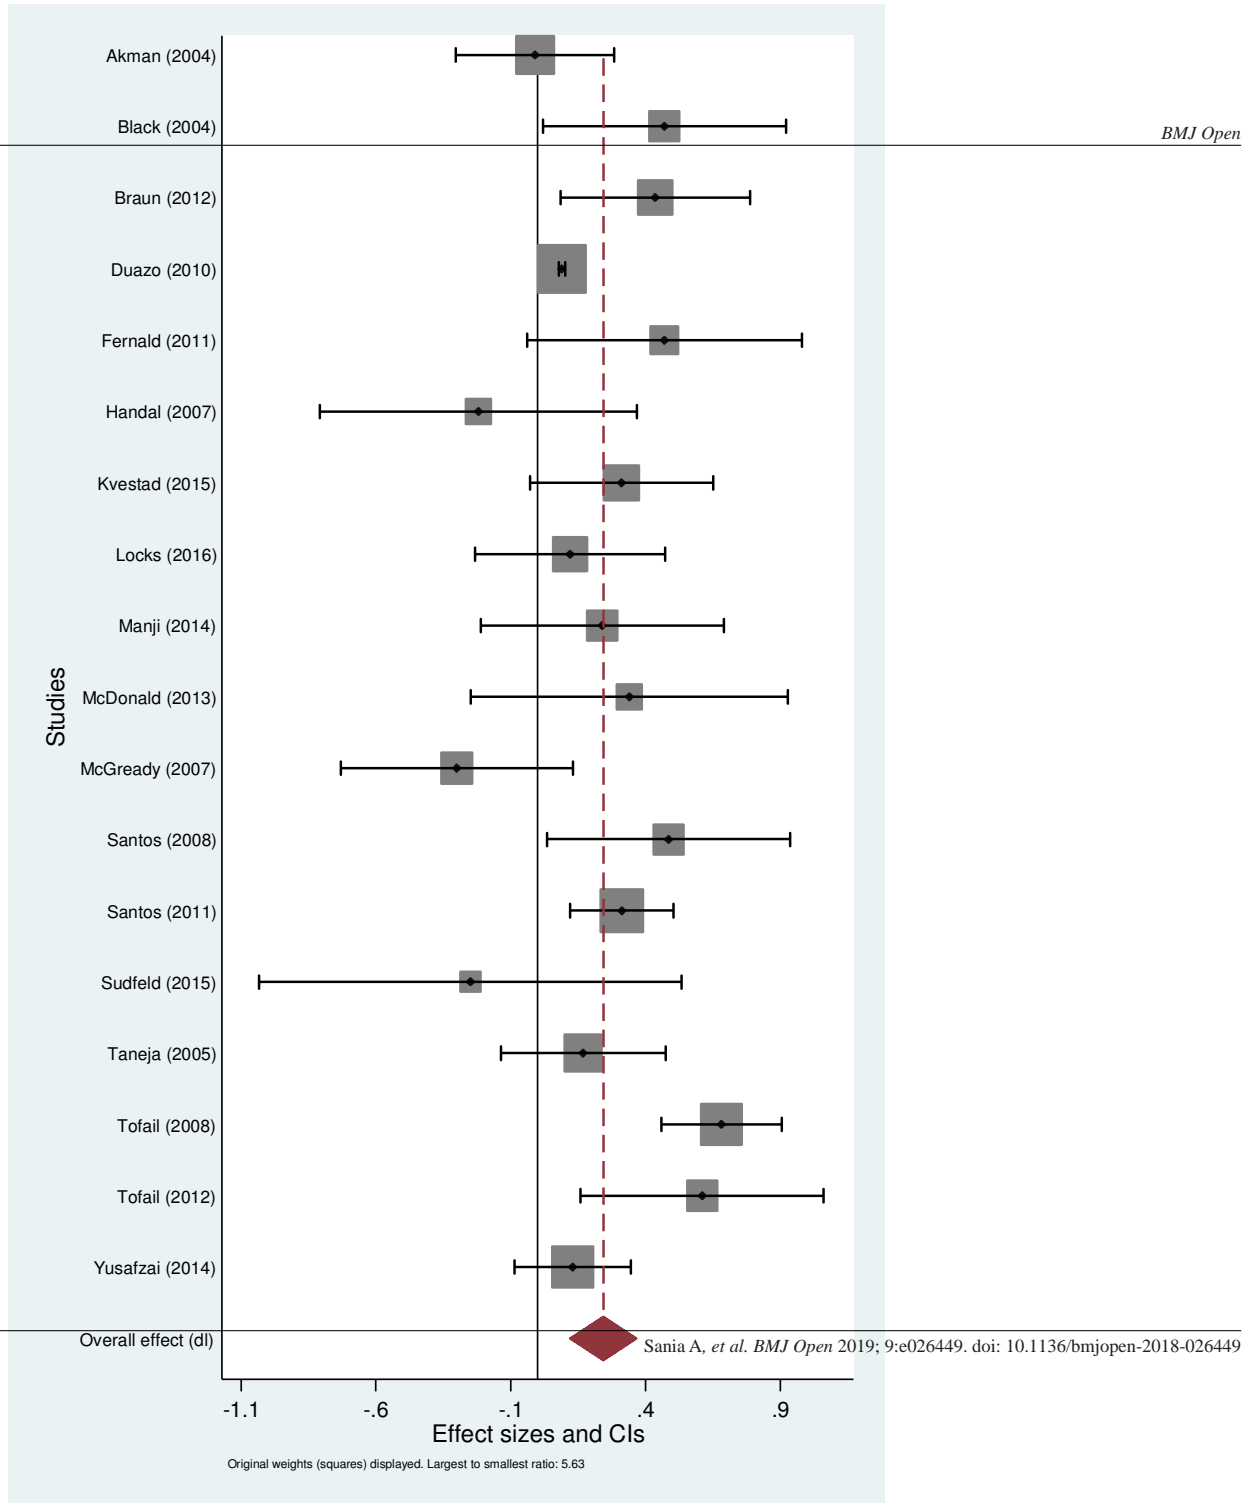

Figure 59: Association between maternal higher education (reference: primary education) and motor development.

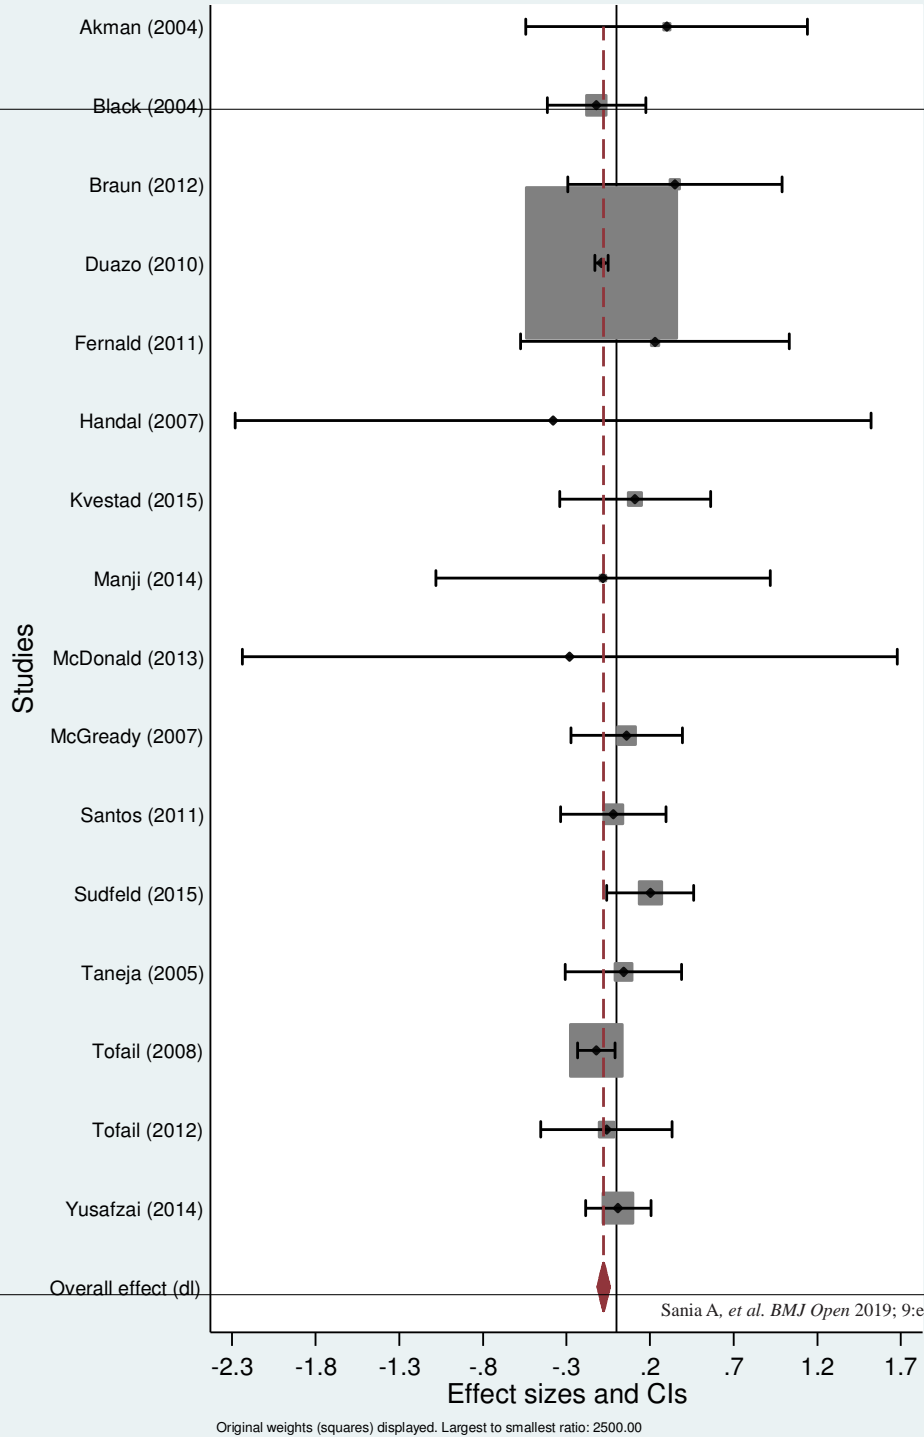

Sania A, et al. *BMJ Open* 2019; 9:e026449. doi: 10.1136/bmjopen-2018-026449

Figure 60: Association between no paternal education (reference: primary education) and motor development.

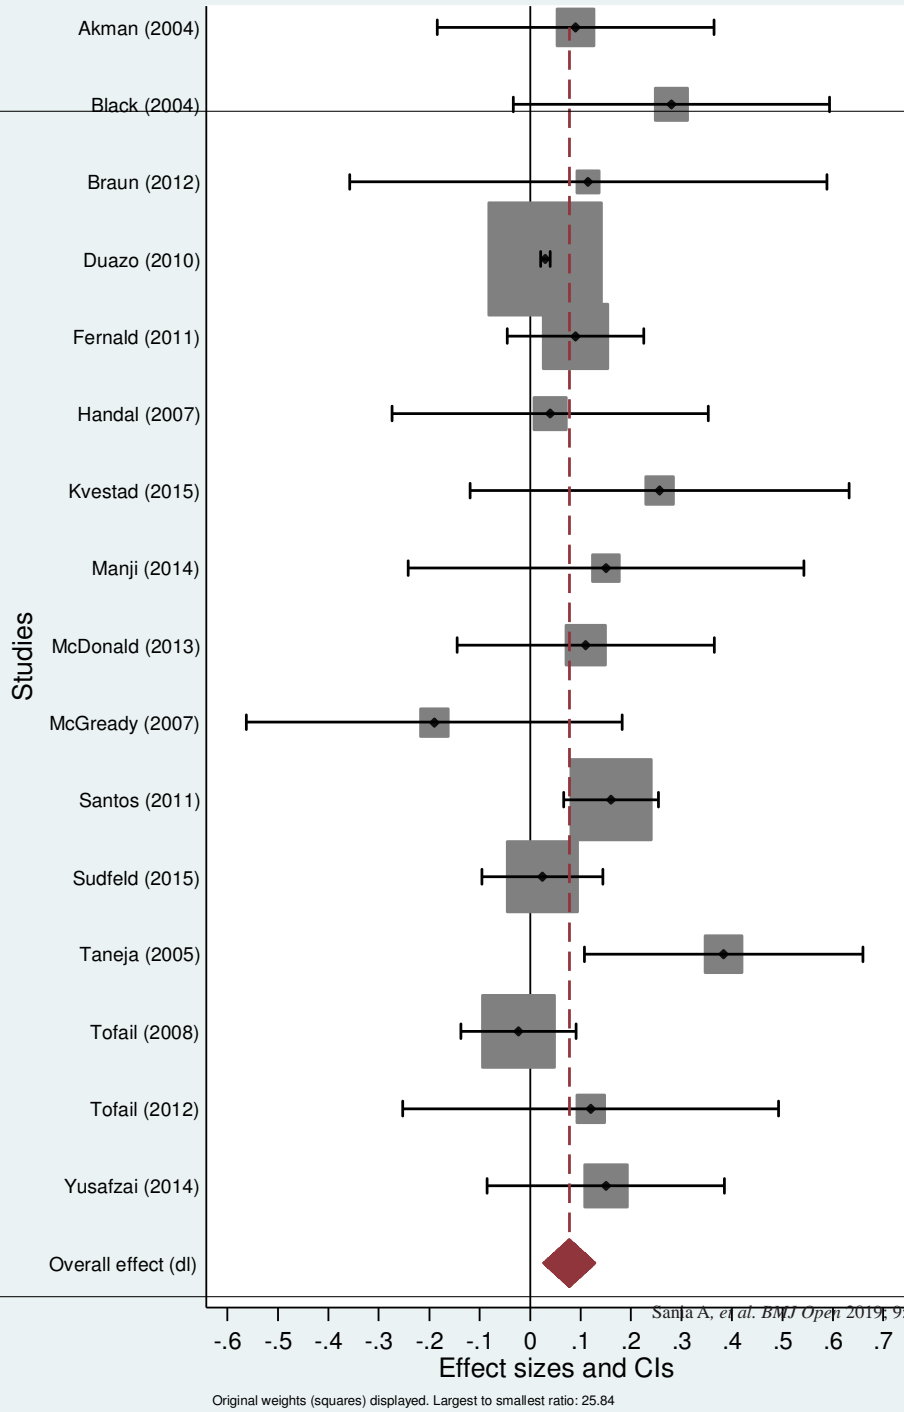

Figure 61: Association between paternal secondary education (reference: primary education) and motor development.

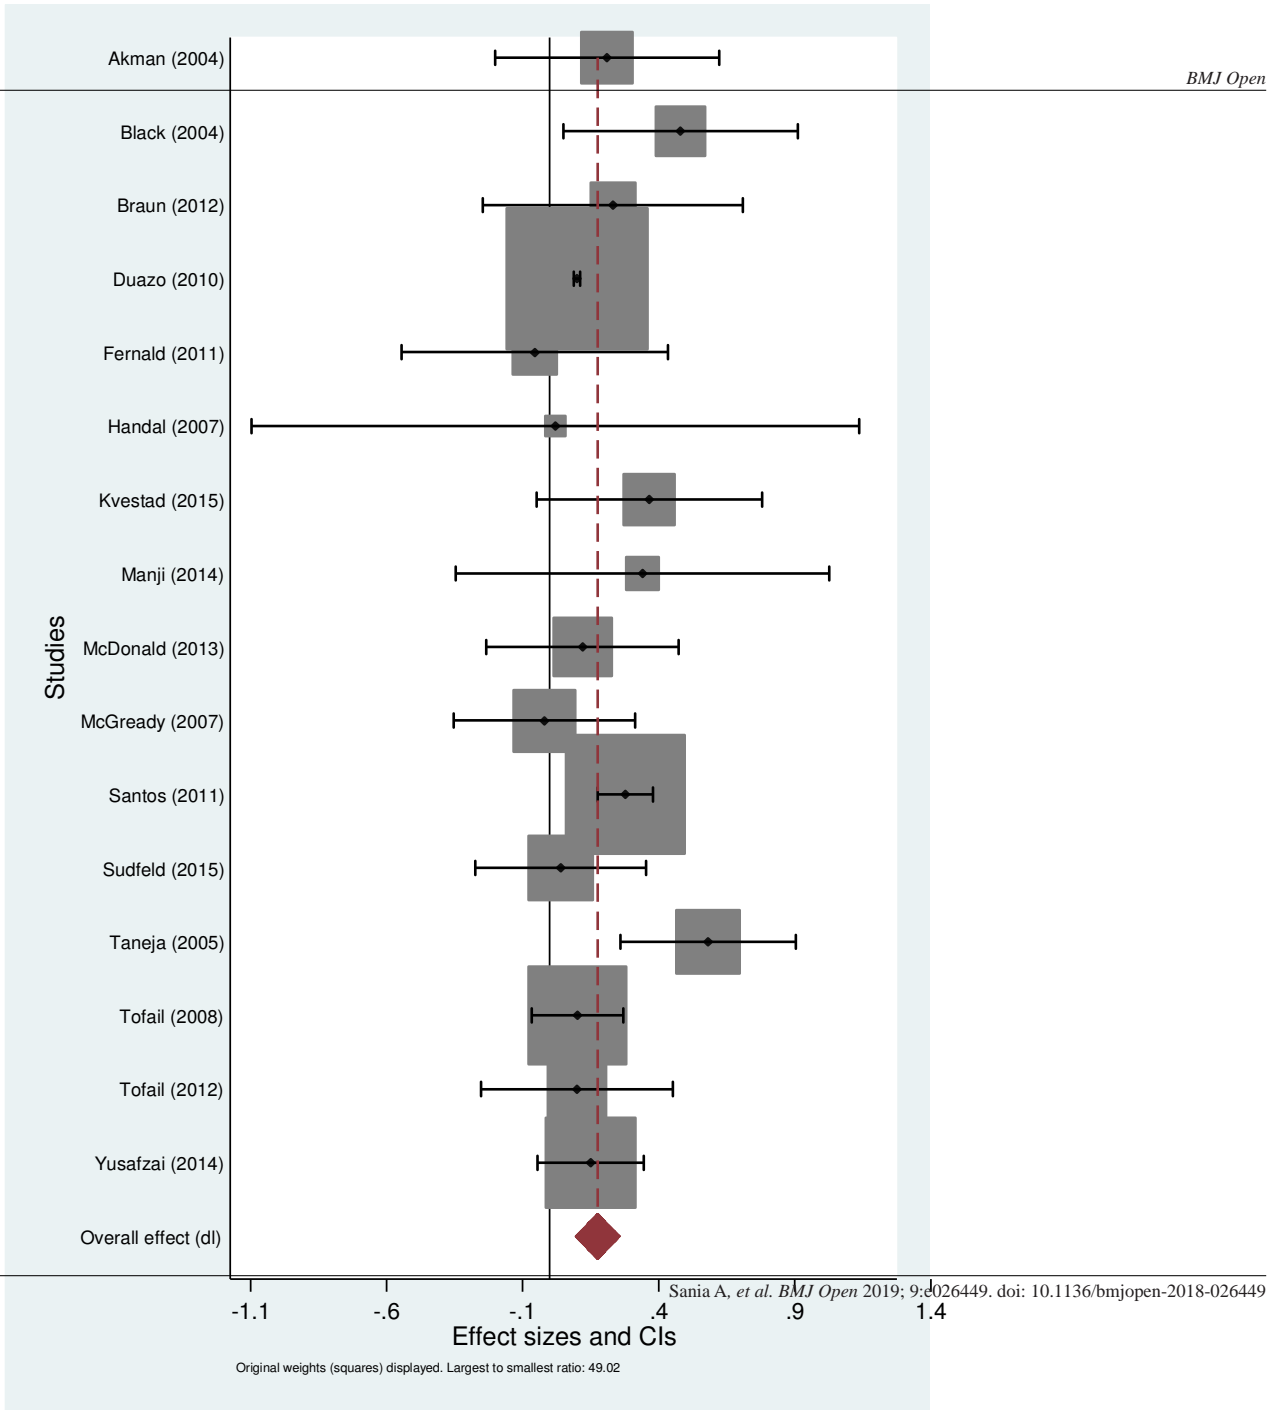

Figure 62: Association between paternal higher education (reference: primary education) and motor development.

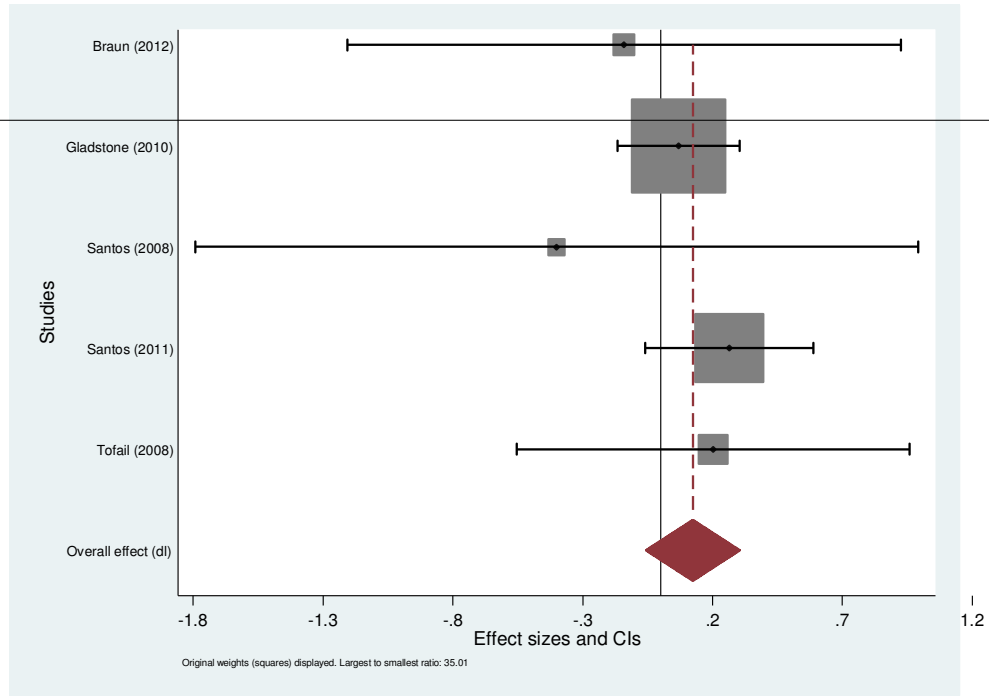

**Figure 63: Association between maternal ages < 15 (reference: ages 20-34) and motor development.**

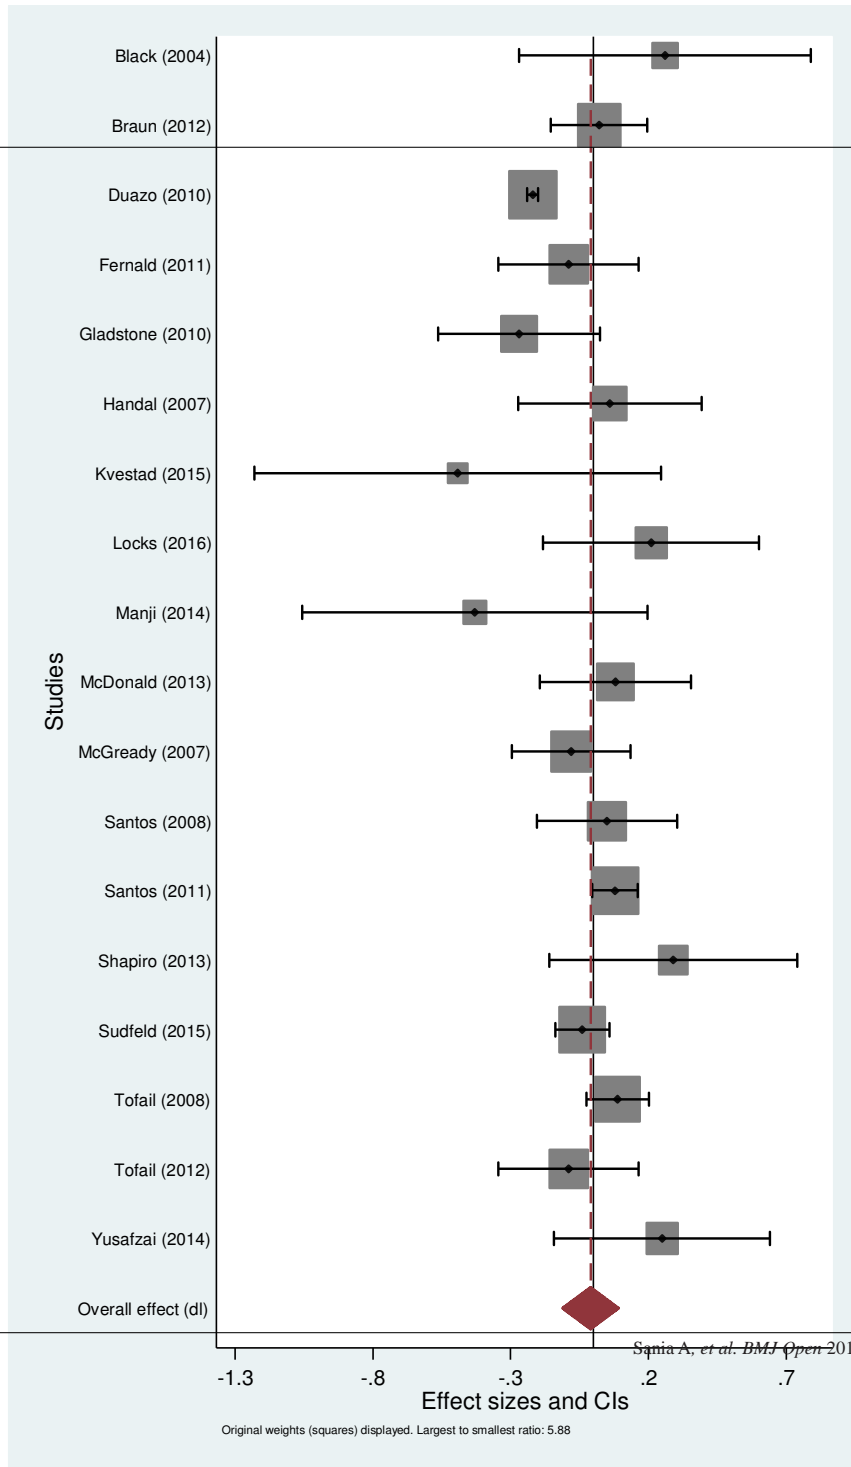

Figure 64: Association between maternal ages 15-20 (reference: ages 20-34) and motor development.

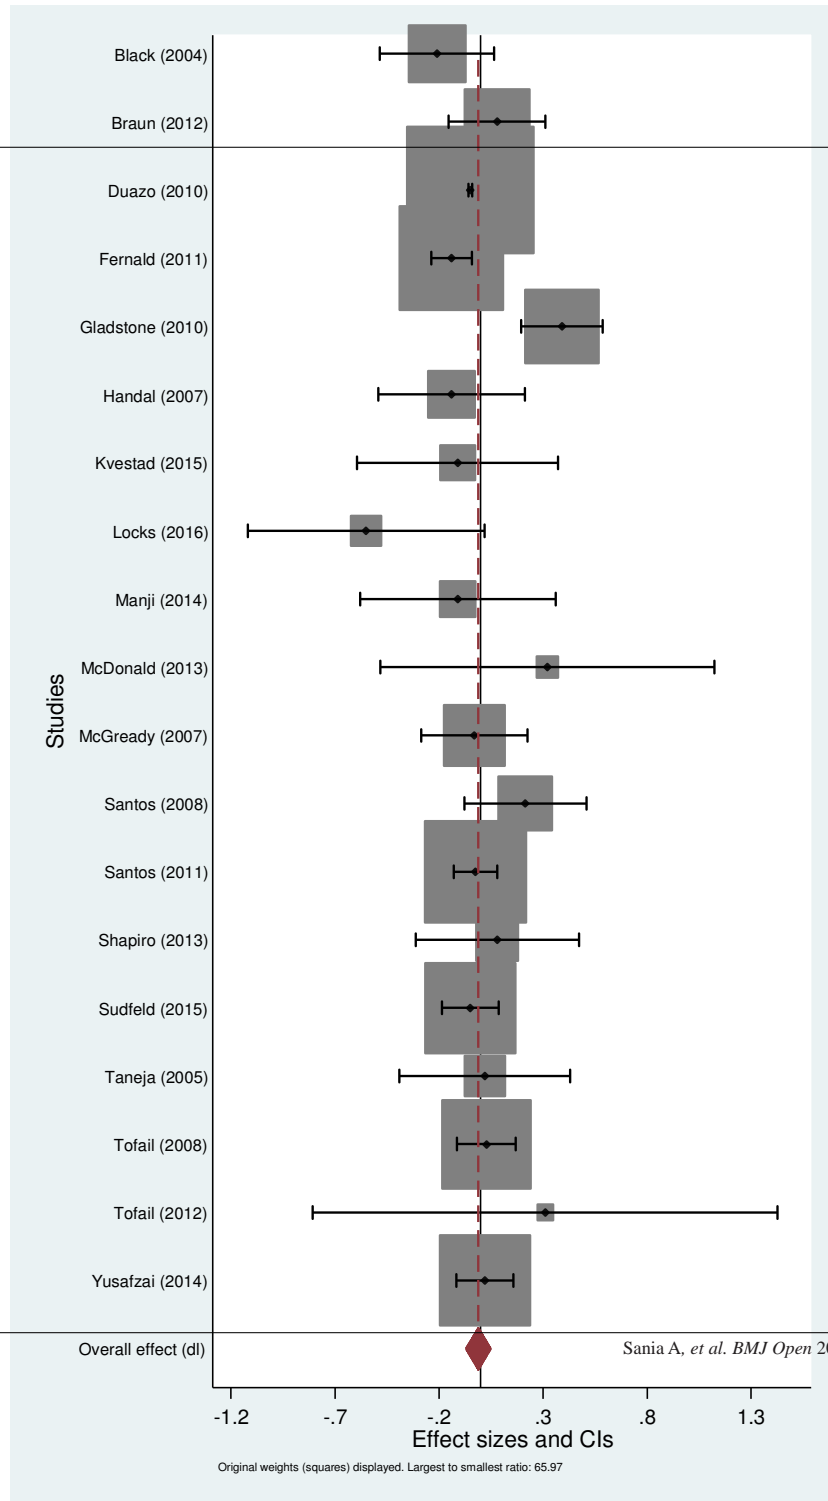

Figure 65: Association between maternal ages >35 (reference: ages 20-34) and motor development.

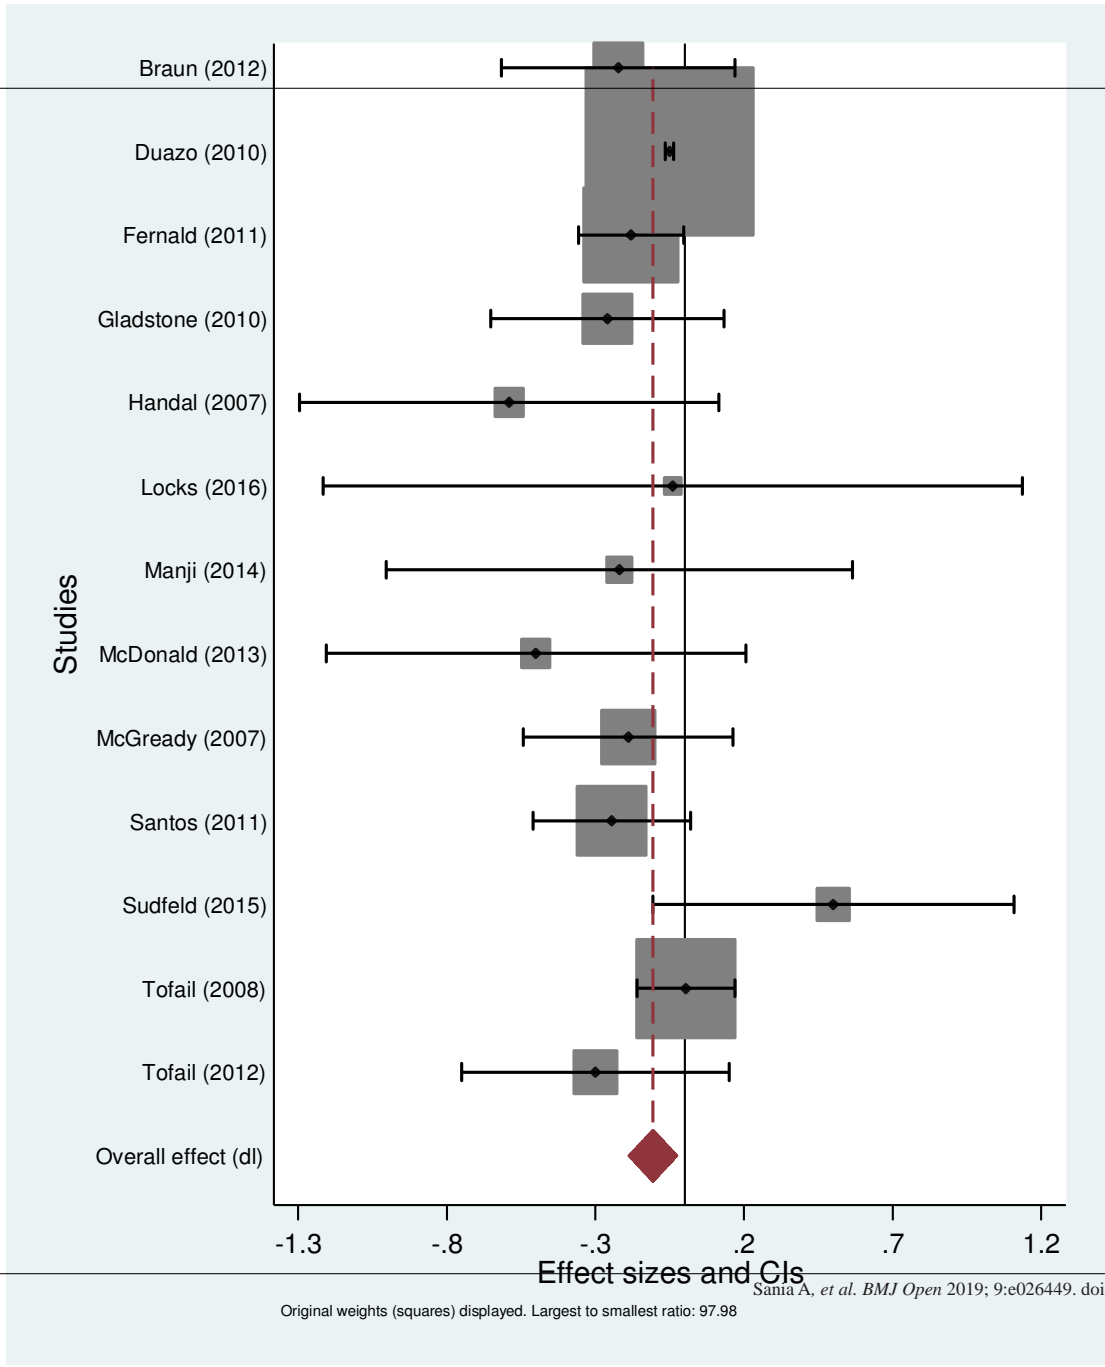

Figure 66: Association between maternal height <145 (reference: >155 cm) and motor development.



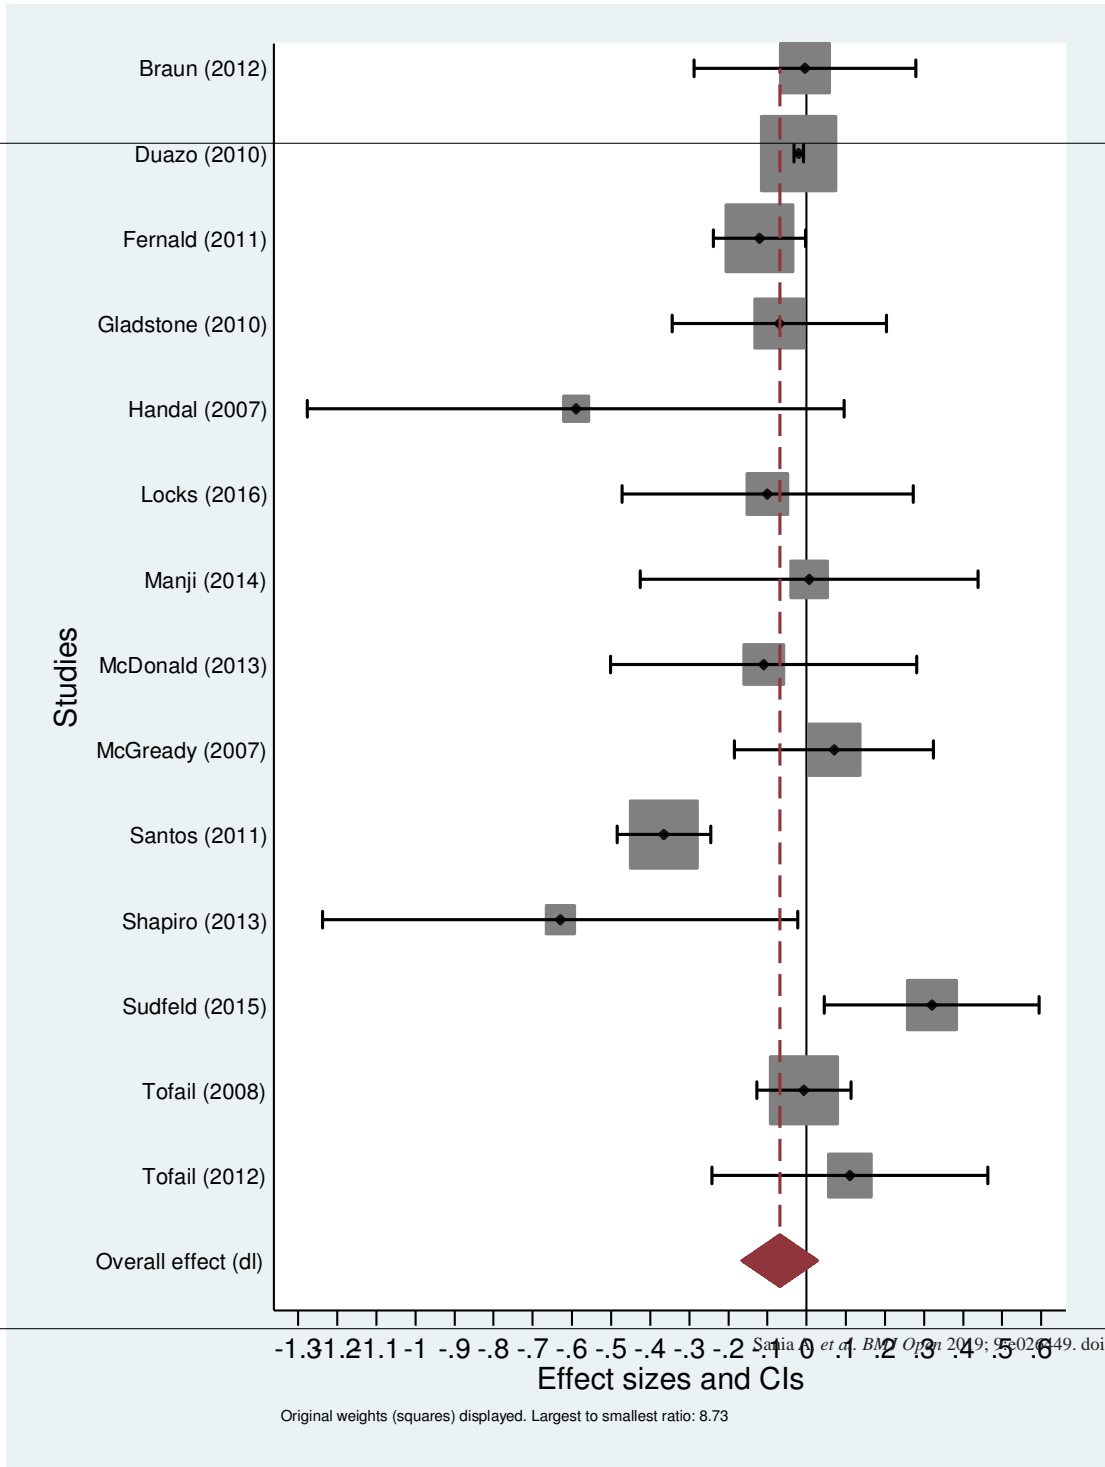

Figure 67: Association between maternal height 145-150 (reference: >155 cm) and motor development.

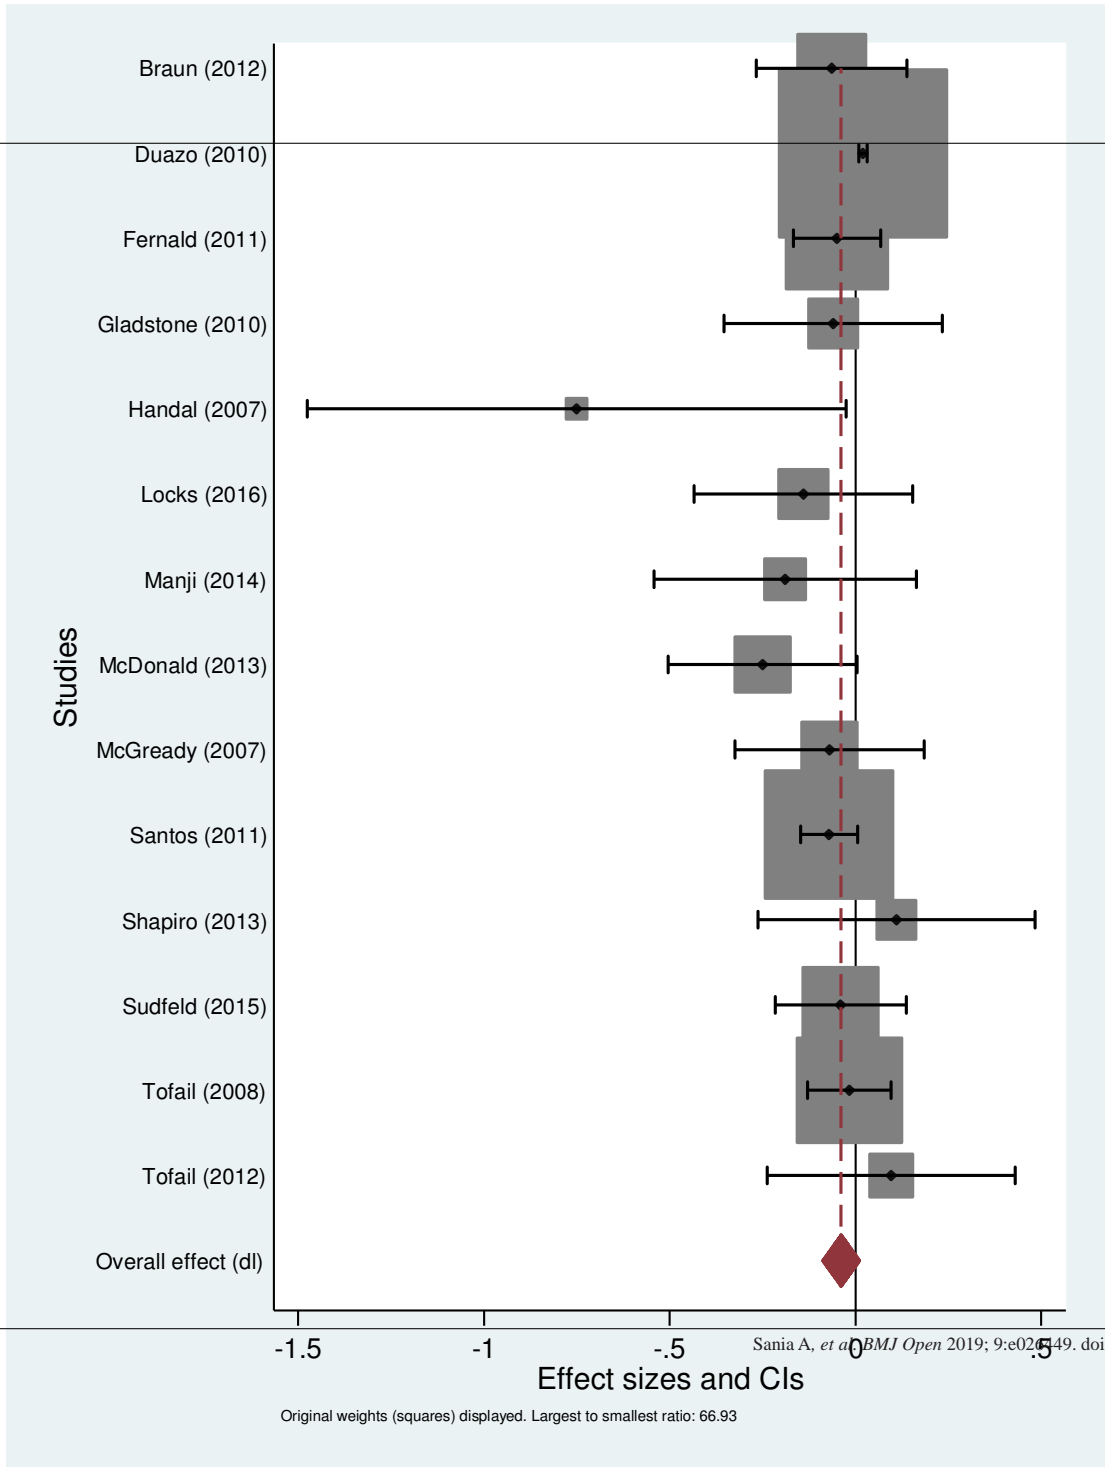

Figure 68: Association between maternal height 150-155 (reference: >155 cm) and motor development.

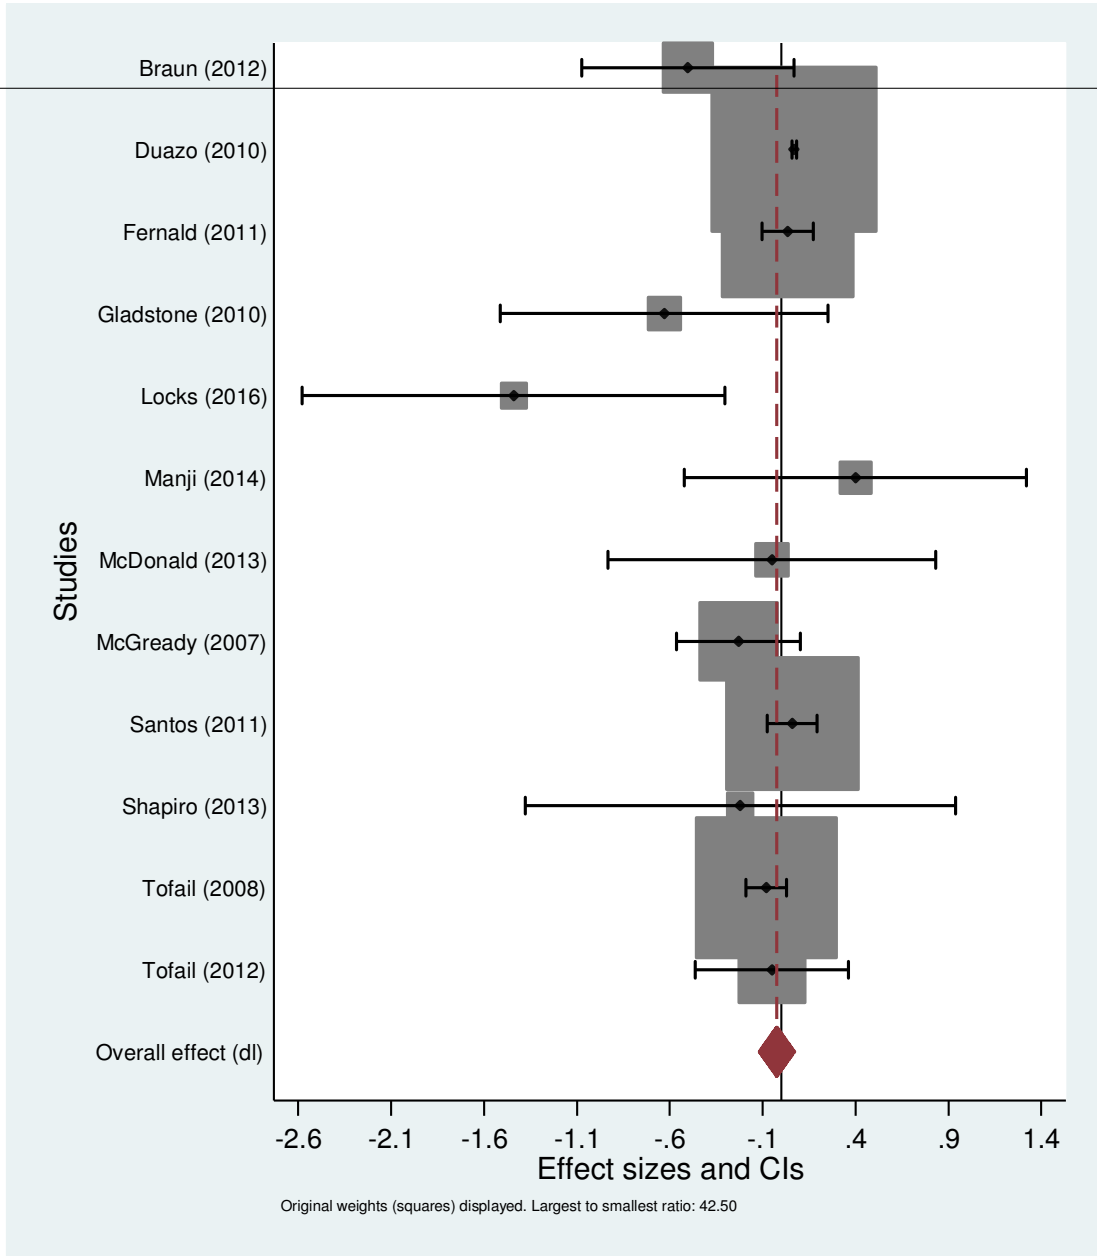

Figure 69: Association between maternal BMI <18.5 kg/m<sup>2</sup> (reference: 18.5-25) and motor development. doi: 10.1136/bmjopen-2018-026449

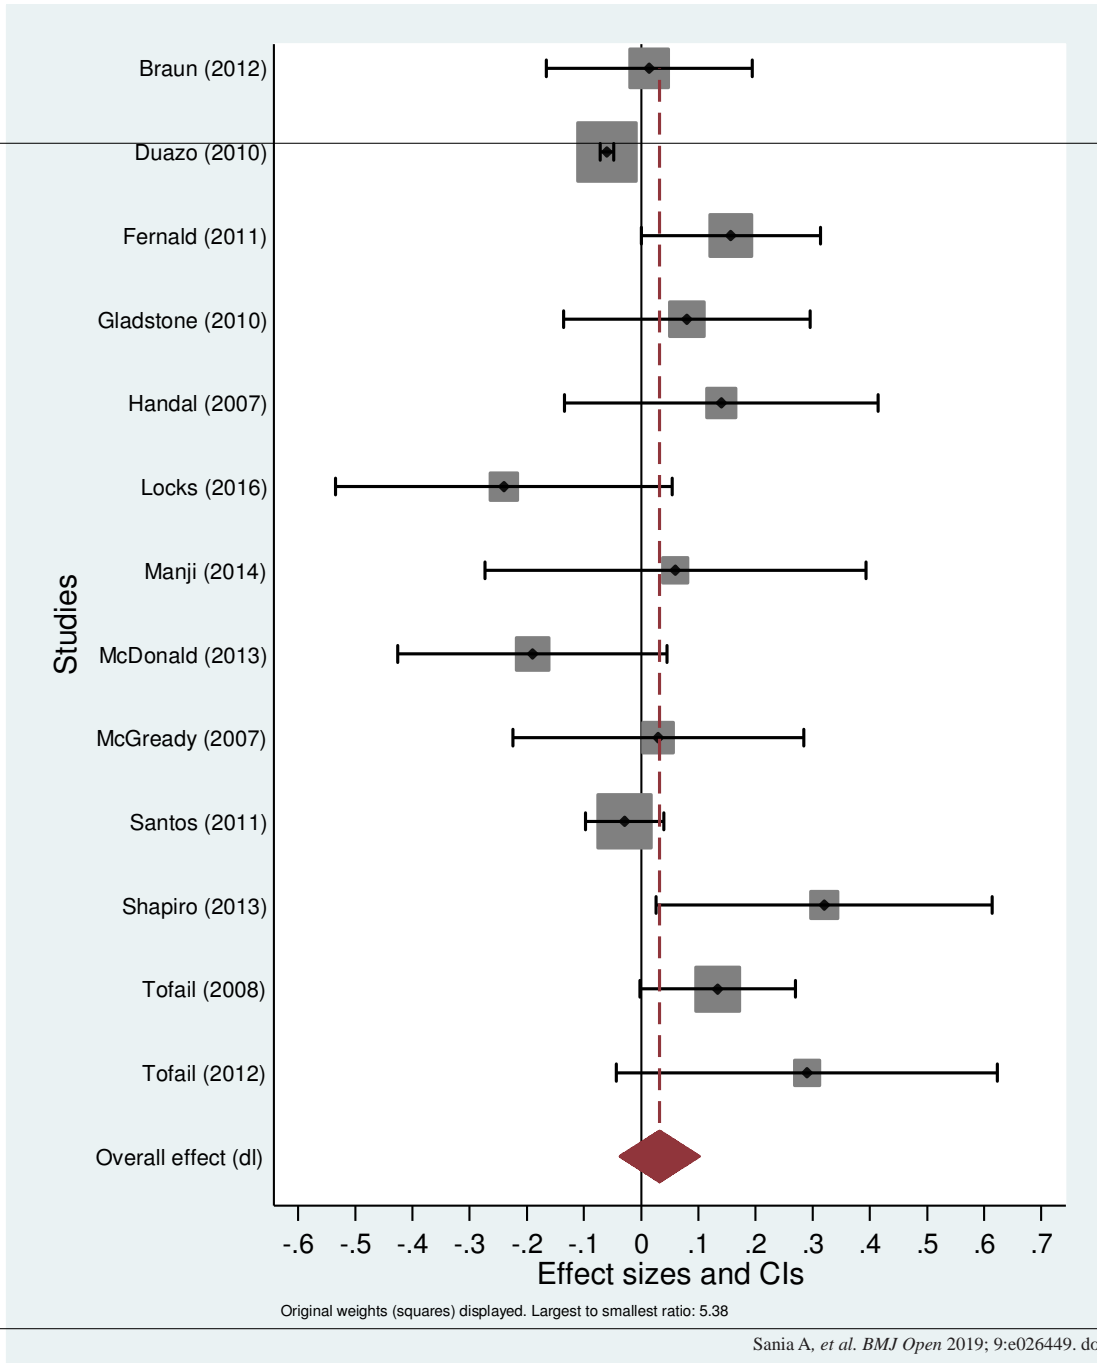

**Figure 70: Association between maternal BMI <25-30 kg/m<sup>2</sup> (reference: 18.5-25) and motor development.**

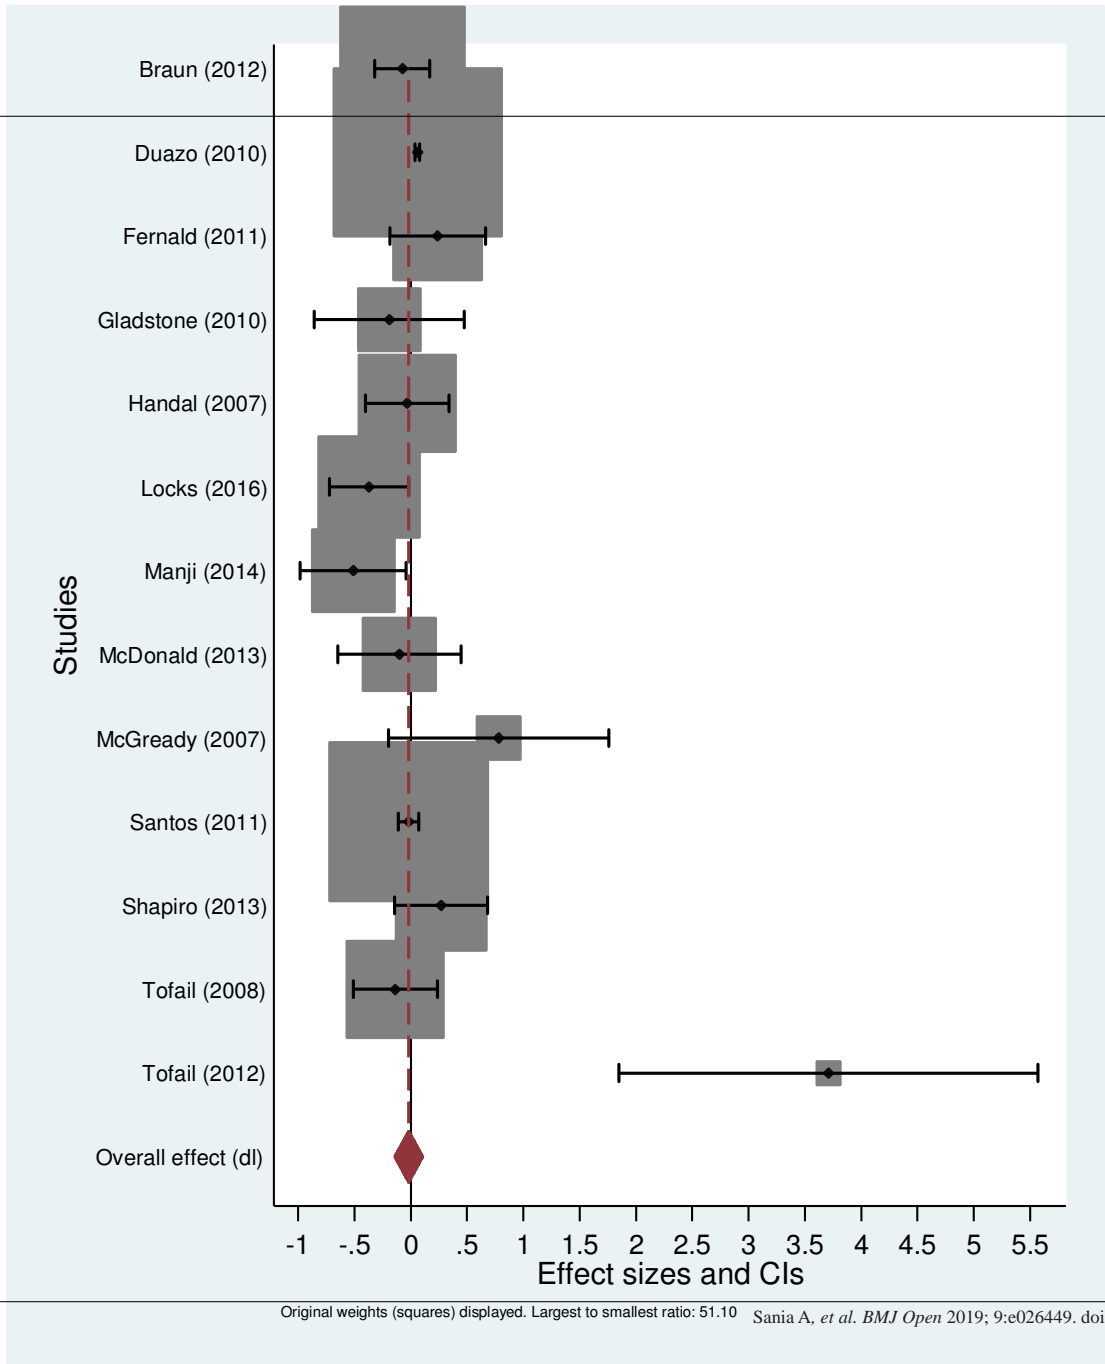

Figure 71: Association between maternal BMI >30 kg/m<sup>2</sup> (reference: 18.5-25) and motor development.

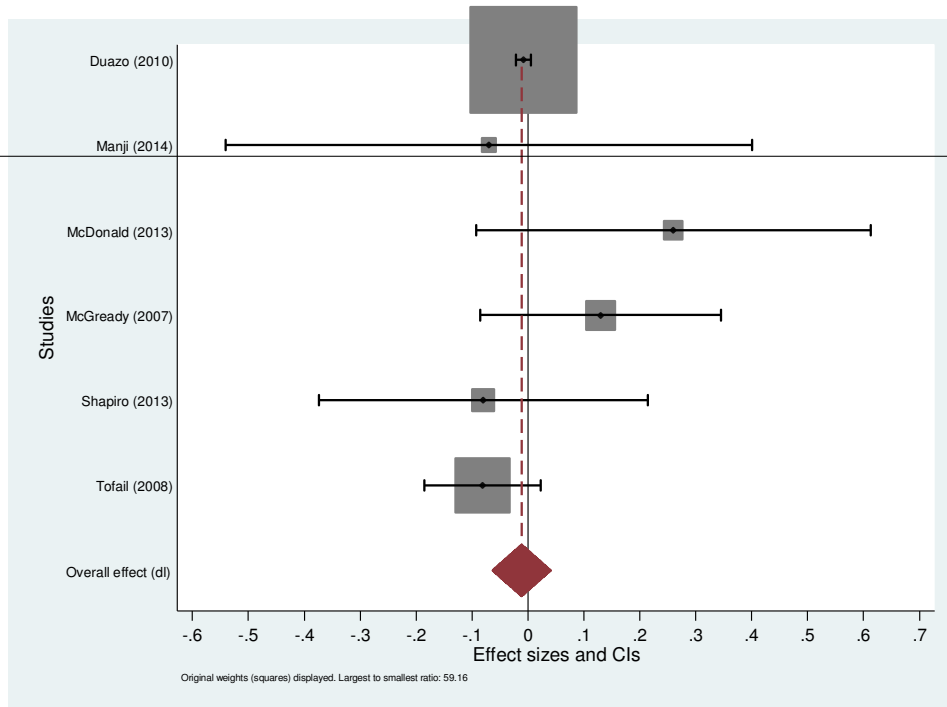

**Figure 72: Association between maternal mild anemia (reference: no anemia) and motor development.**

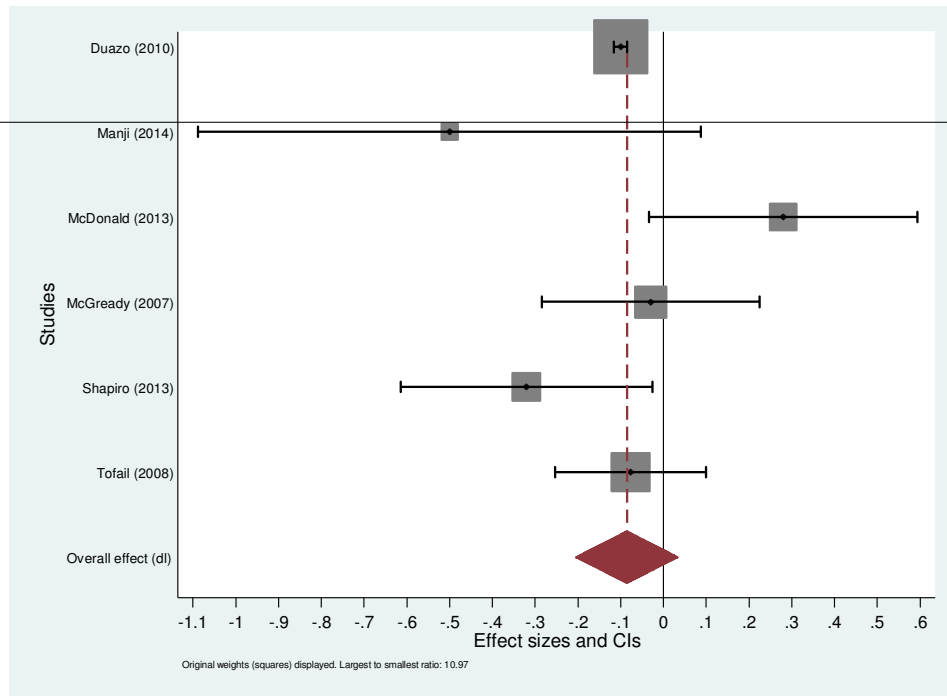

**Figure 73: Association between maternal moderate anemia (reference: no anemia) and motor development.**

## 6. Parental Risk Factors on Child's Language Development

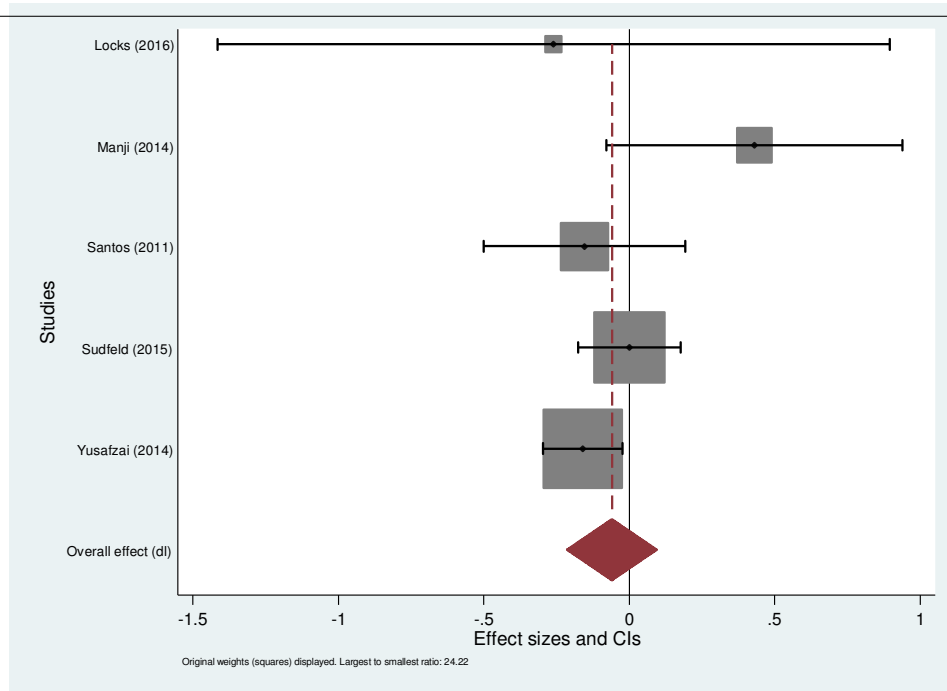

Figure 74: Association between no maternal education (reference: primary education) and language development.



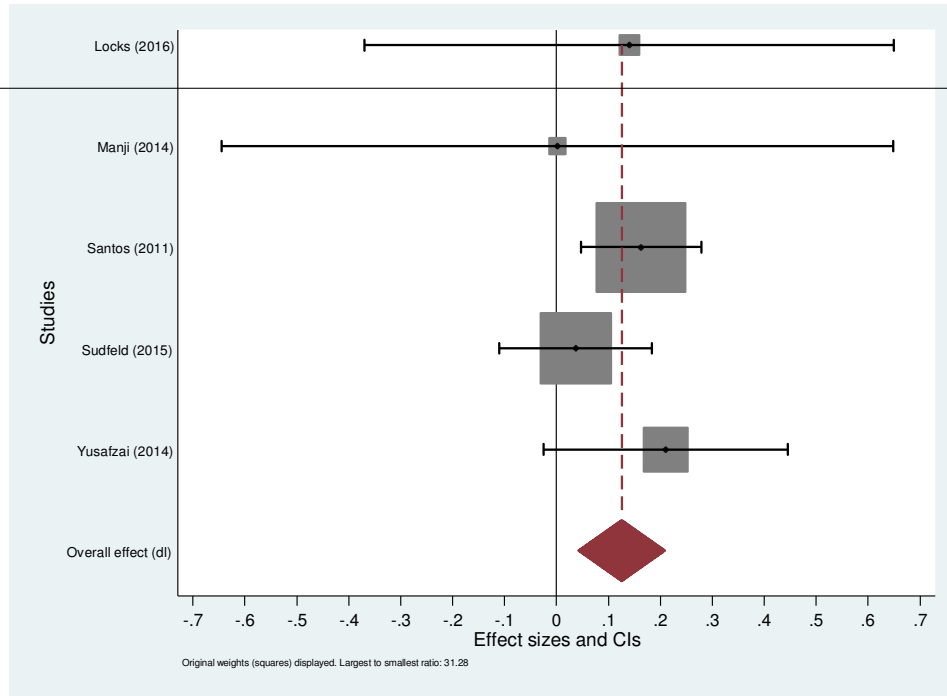

Figure 75: Association between maternal secondary education (reference: primary education) and language development.

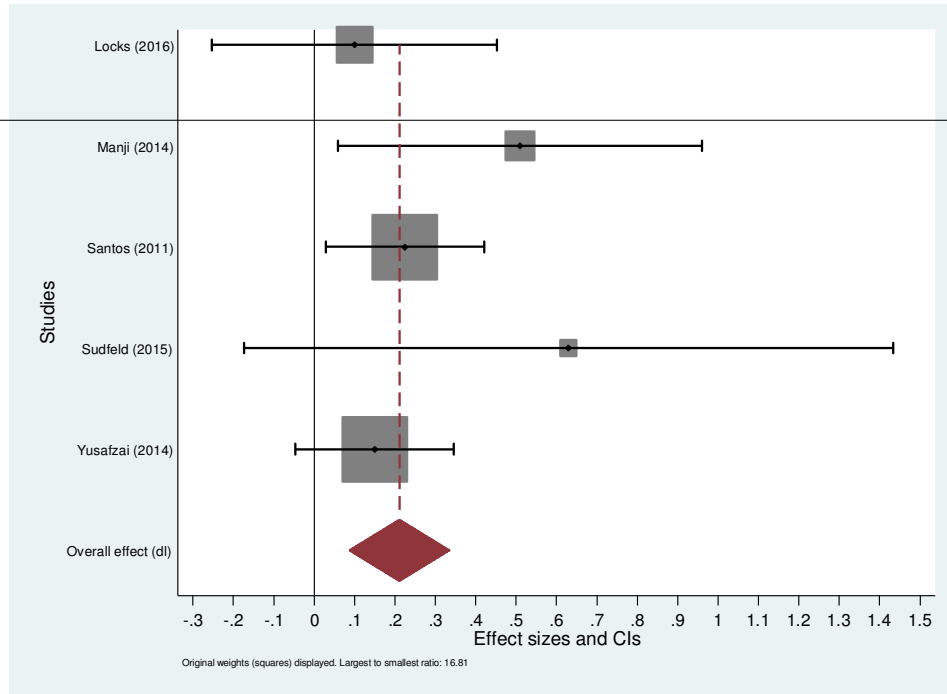

**Figure 76: Association between maternal higher education (reference: primary education) and language development.**

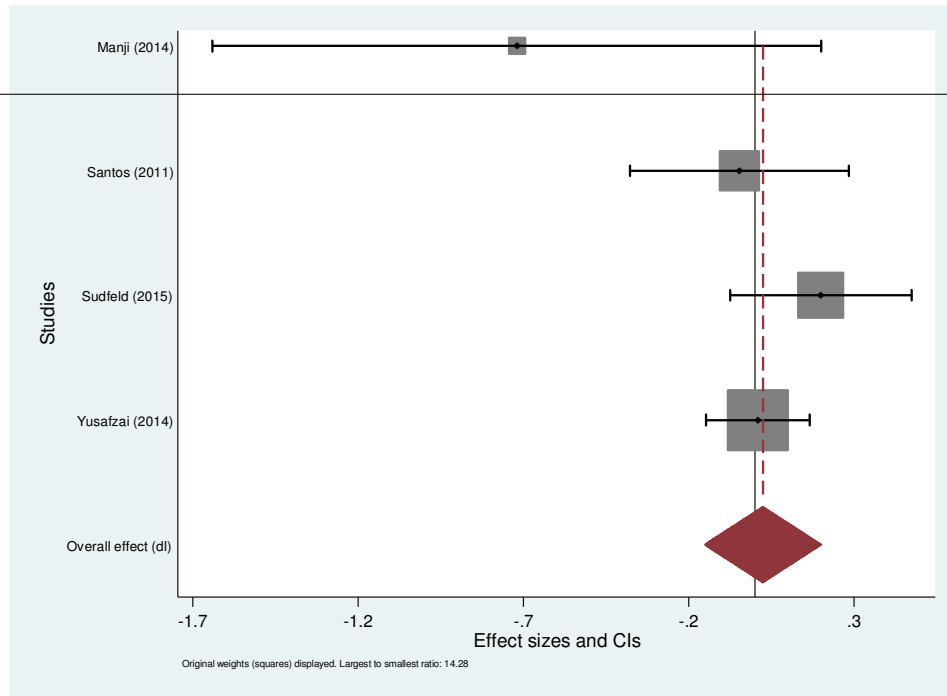

**Figure 77: Association between no paternal education (reference: primary education) and language development.**

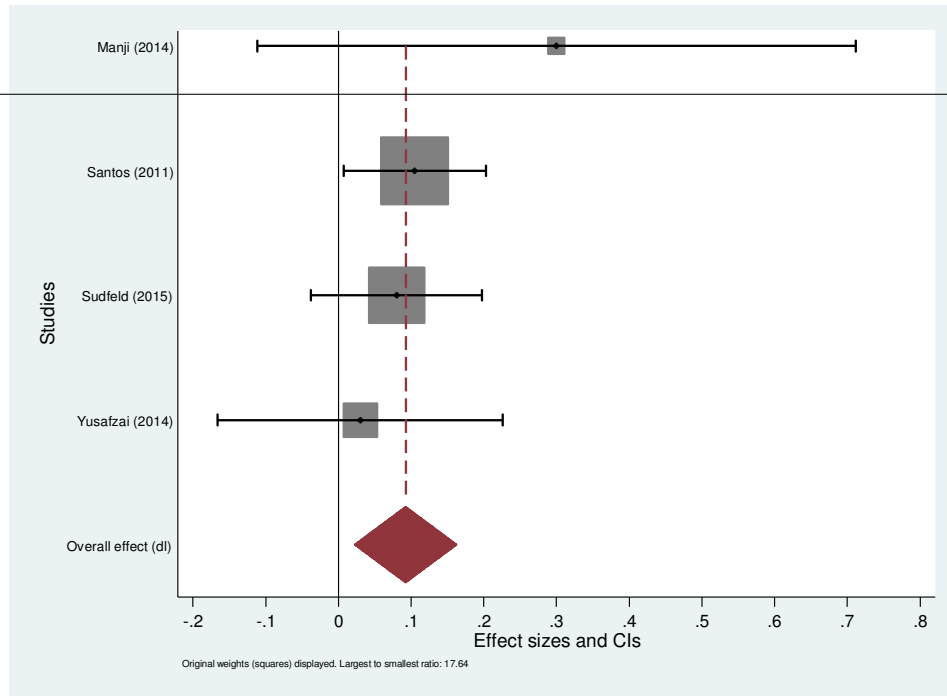

Figure 78: Association between paternal secondary education (reference: primary education) and language development.

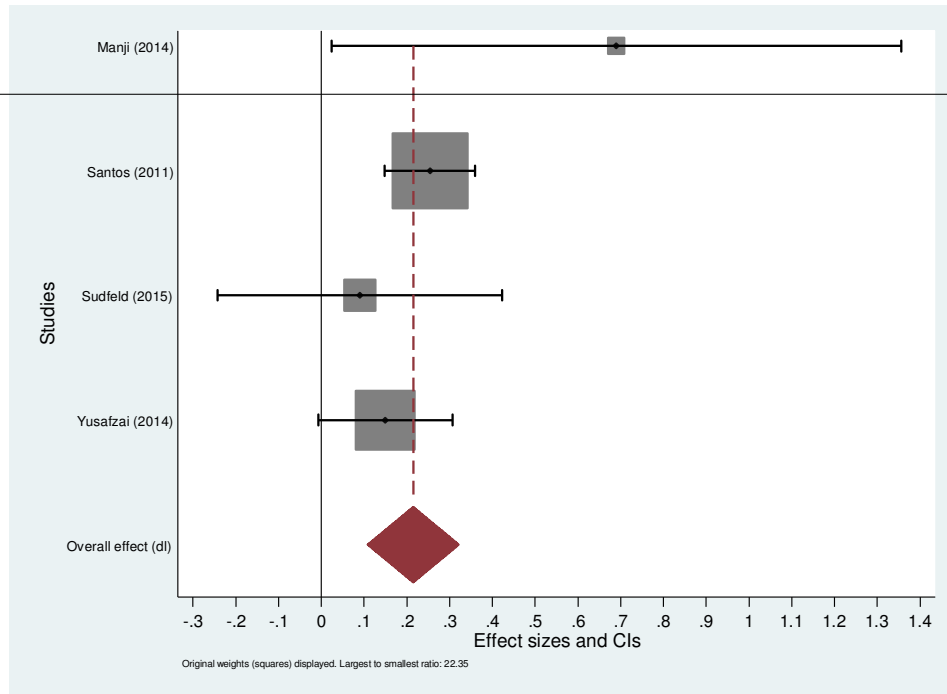

**Figure 79: Association between paternal higher education (reference: primary education) and language development.**

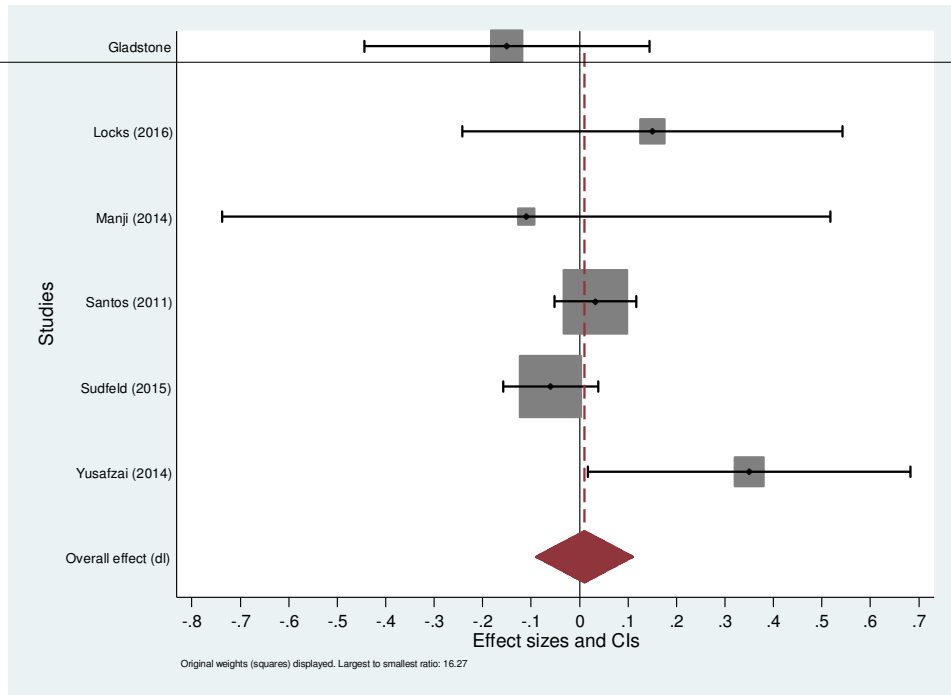

Figure 80: Association between maternal ages 15-20 (reference: ages 20-34) and language development.

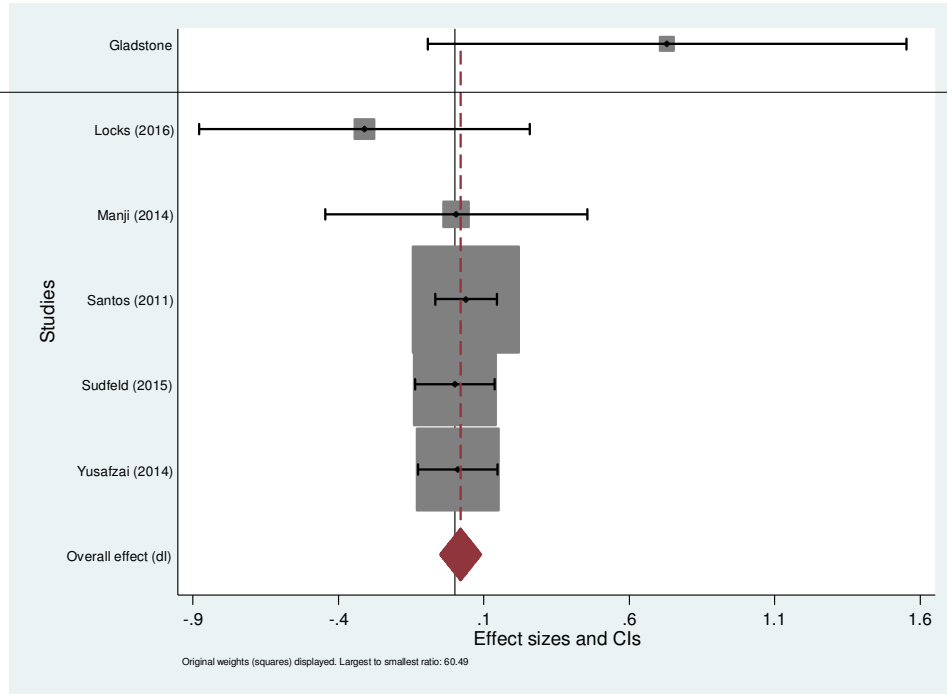

**Figure 81: Association between maternal ages >35 (reference: ages 20-34) and language development.**

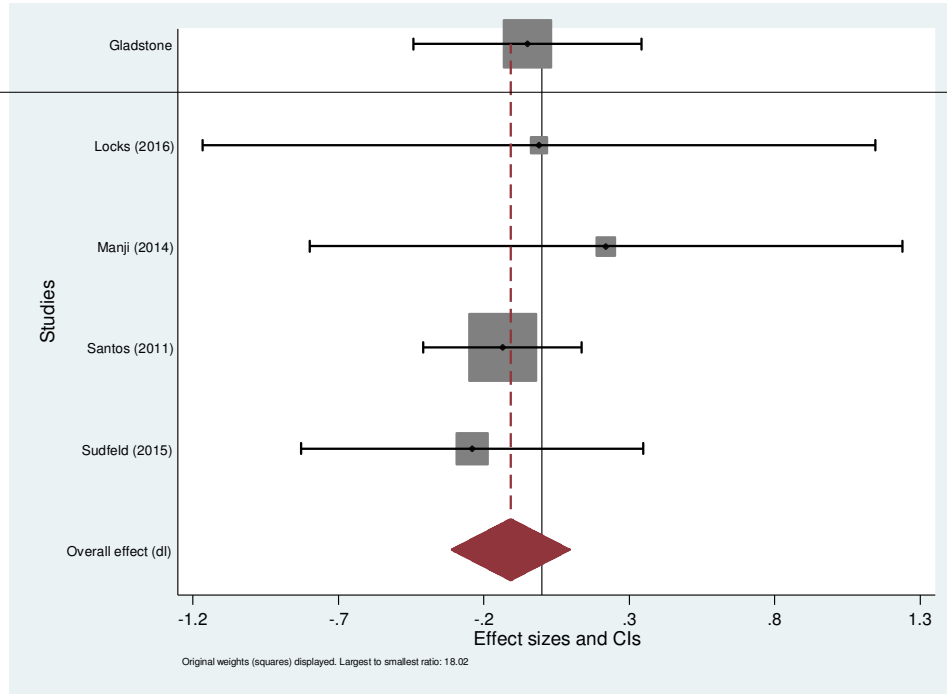

Figure 82: Association between maternal height <145 cm (reference: >155 cm) and language development.



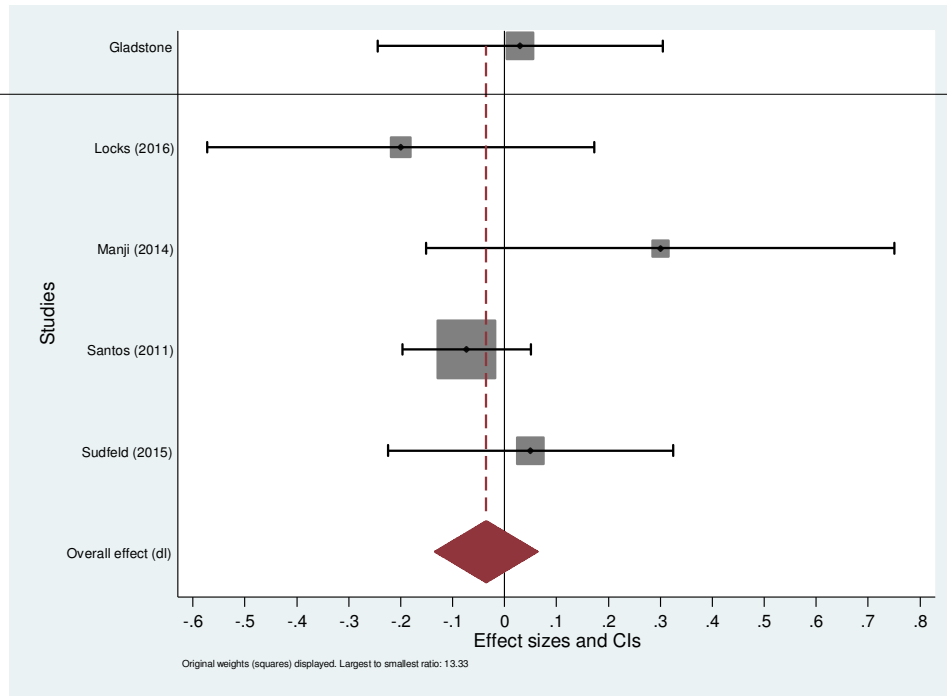

Figure 83: Association between maternal height 145-150cm (reference: >155 cm) and language development.

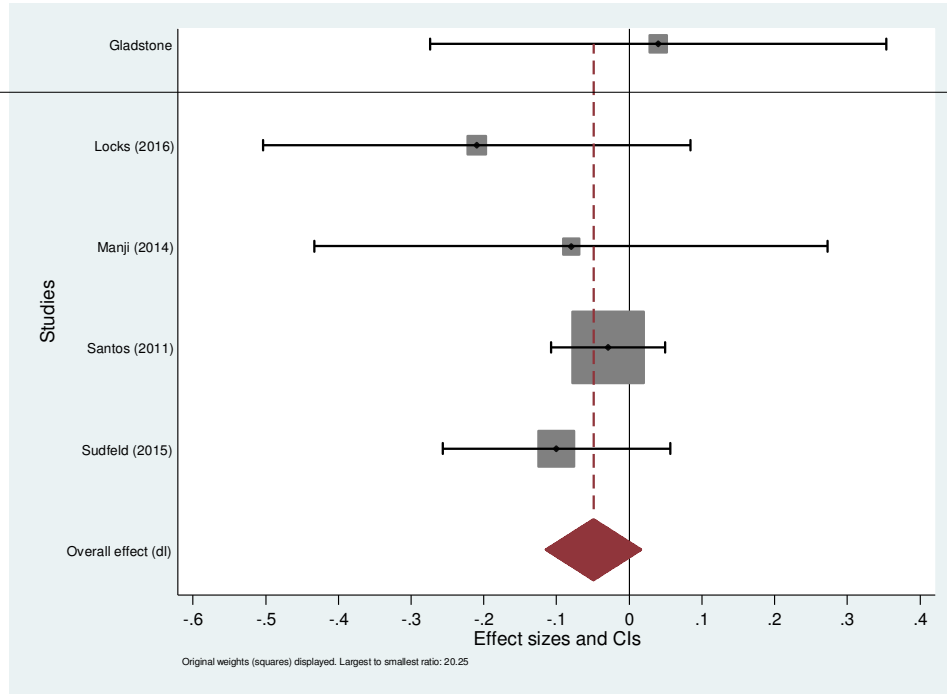

**Figure 84: Association between maternal height 150-155 cm (reference: >155 cm) and language development.**

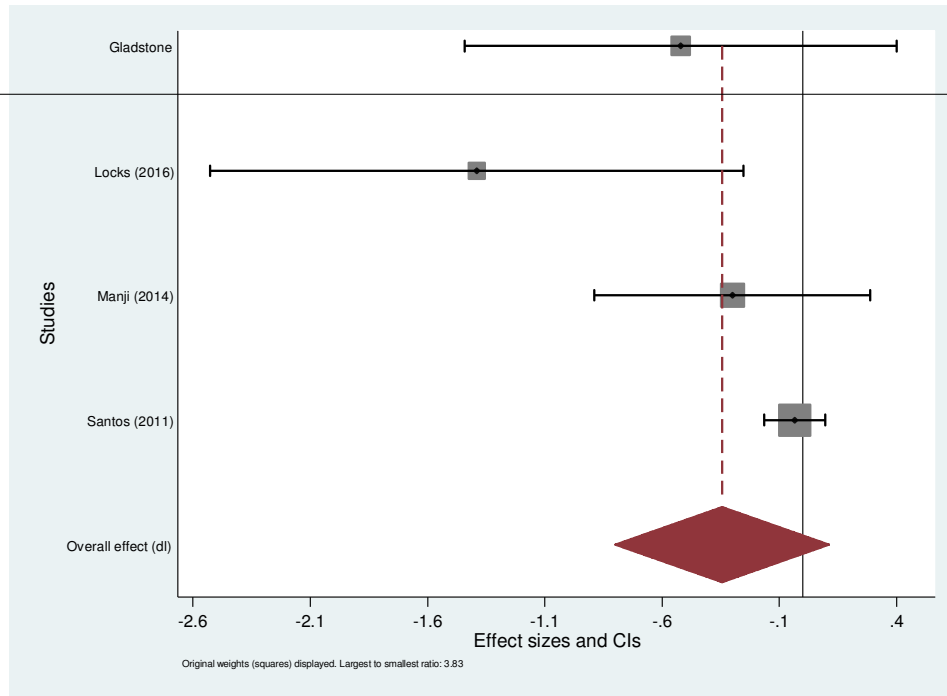

Figure 85: Association between maternal BMI 25-30 kg/m<sup>2</sup> (reference: 18.5-25) and language development.

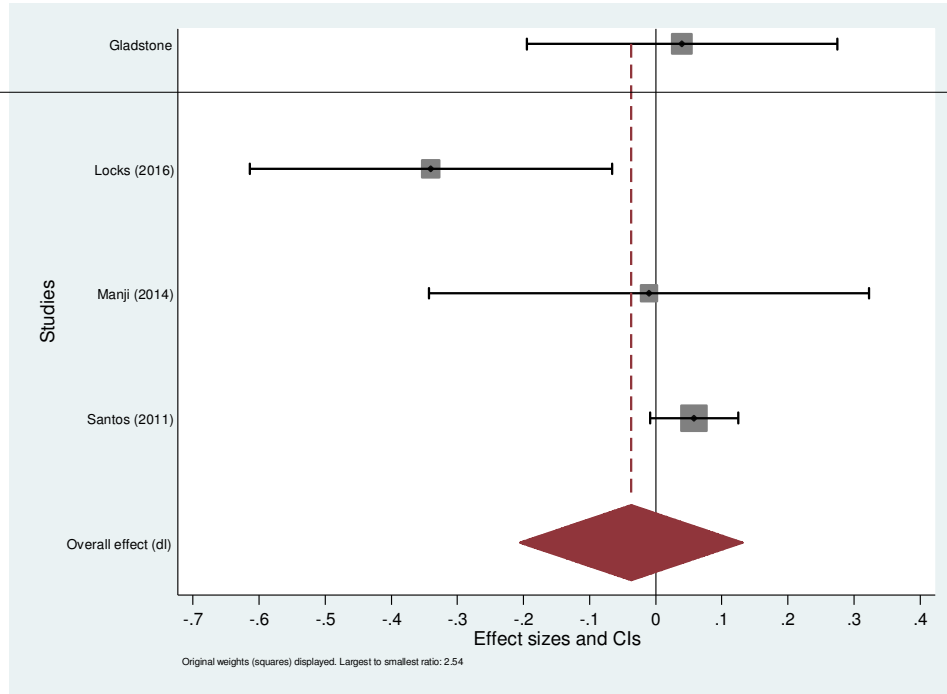

Figure 86: Association between maternal BMI >30 kg/m<sup>2</sup> (reference: 18.5-25) and language development.
